# Supplementary material for: Morita–Baylis–Hillman reaction: how do optimal enzyme active sites compare with organocatalysts
Source: Royal Society of Chemistry journal article supplement (doi:10.1039/d2cy00929c), 2022-06-21
Supplement: d2cy00929c1.pdf [file d2cy00929c1.pdf]

## Supporting Information

### **Morita-Baylis-Hillman Reaction: How Do Optimal Enzyme Active Sites Compare With Organocatalysts**

**Tuğçe Ütnier, and Nihan Çelebi-Ölçüm**

*Department of Chemical Engineering, Yeditepe University, 26 Ağustos Yerleşimi, İstanbul, 34755 Turkey*

Correspondence to: Nihan Çelebi-Ölçüm (E-mail: [nihan.celebi@yeditepe.edu.tr](mailto:nihan.celebi@yeditepe.edu.tr))

#### **Table of Contents**

|                                                                         |      |
|-------------------------------------------------------------------------|------|
| OVERLAY OF KEY STATIONARY POINTS ALONG THE REACTION PATHWAY .....       | S2   |
| COORDINATES AND PROPERTIES OF OPTIMIZED STATIONARY POINTS .....         | S3   |
| POTENTIAL ENERGY SURFACE SCAN RESULTS FOR C-C BOND FORMATION STEP ..... | S190 |

**OVERLAY OF KEY STATIONARY POINTS ALONG THE REACTION PATHWAY**

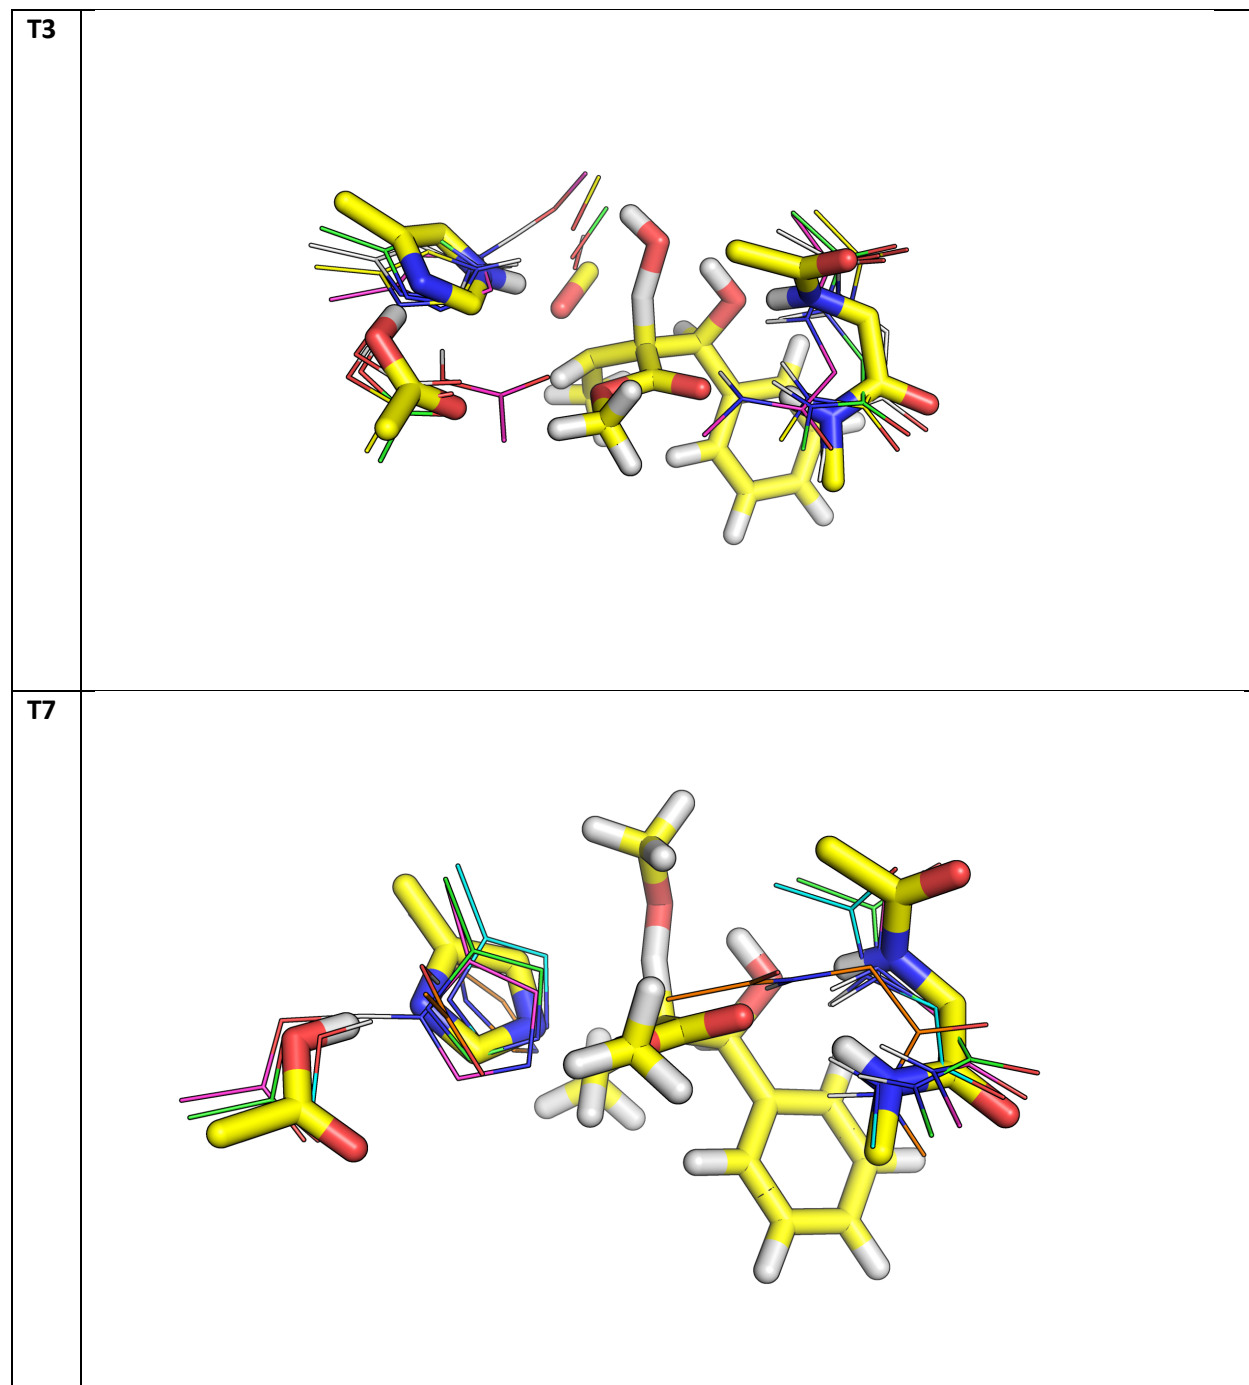

## COORDINATES AND PROPERTIES OF OPTIMIZED STATIONARY POINTS

Optimized Molecular Properties for **Methyl Acrylate**

|                                          |                                                                                                                                                                                                                                                                                                                                                                                                                                                                                                                                                                                                                                                                                                                                                                                                                                                                                                                                                                                                                                                                                                                                                                  |          |          |          |         |   |          |          |          |   |          |          |         |   |          |          |          |   |         |          |         |   |         |          |         |   |          |          |          |   |          |         |          |   |         |          |         |   |          |         |         |   |         |         |          |   |         |          |         |   |         |         |          |   |         |         |         |   |         |          |          |
|------------------------------------------|------------------------------------------------------------------------------------------------------------------------------------------------------------------------------------------------------------------------------------------------------------------------------------------------------------------------------------------------------------------------------------------------------------------------------------------------------------------------------------------------------------------------------------------------------------------------------------------------------------------------------------------------------------------------------------------------------------------------------------------------------------------------------------------------------------------------------------------------------------------------------------------------------------------------------------------------------------------------------------------------------------------------------------------------------------------------------------------------------------------------------------------------------------------|----------|----------|----------|---------|---|----------|----------|----------|---|----------|----------|---------|---|----------|----------|----------|---|---------|----------|---------|---|---------|----------|---------|---|----------|----------|----------|---|----------|---------|----------|---|---------|----------|---------|---|----------|---------|---------|---|---------|---------|----------|---|---------|----------|---------|---|---------|---------|----------|---|---------|---------|---------|---|---------|----------|----------|
| Number of (-)<br>Vibrational Frequencies | 0                                                                                                                                                                                                                                                                                                                                                                                                                                                                                                                                                                                                                                                                                                                                                                                                                                                                                                                                                                                                                                                                                                                                                                |          |          |          |         |   |          |          |          |   |          |          |         |   |          |          |          |   |         |          |         |   |         |          |         |   |          |          |          |   |          |         |          |   |         |          |         |   |          |         |         |   |         |         |          |   |         |          |         |   |         |         |          |   |         |         |         |   |         |          |          |
| Absolute Energies<br>(Hartrees)          | <p><b>B3LYP/6-31G(d)</b></p> <p>There are 1 positive frequencies below 100 cm<sup>-1</sup>.</p> <p>Zero-point correction: 0.124102 hartree<br/>         Enthalpy correction: 0.133228 hartree<br/>         Free Energy correction: 0.091358 hartree<br/>         Quasiharmonic Free Energy correction: 0.091479 hartree</p> <p>SCF Energy: -345.788392 hartree<br/>         SCF Energy + ZPVE: -345.664290 hartree<br/>         Enthalpy: -345.655164 hartree<br/>         Free Energy: -345.697034 hartree</p> <p>Free Energy with quasiharmonic correction: -345.696913 hartree (correction: 0.08 kcal/mol)</p> <p><b>B3LYP-D3/6-311+G(d,p)</b></p> <p>SCF Done: E(RB3LYP) = -345.902768366 A.U.</p>                                                                                                                                                                                                                                                                                                                                                                                                                                                           |          |          |          |         |   |          |          |          |   |          |          |         |   |          |          |          |   |         |          |         |   |         |          |         |   |          |          |          |   |          |         |          |   |         |          |         |   |          |         |         |   |         |         |          |   |         |          |         |   |         |         |          |   |         |         |         |   |         |          |          |
| Cartesian Coordinates                    | <p>15</p> <p>spD3-substrate.out Energy: -217057.2625030</p> <table> <tr><td>H</td><td>-2.94777</td><td>-0.43494</td><td>0.89106</td></tr> <tr><td>H</td><td>-2.69654</td><td>-1.97114</td><td>-0.00264</td></tr> <tr><td>C</td><td>-2.51214</td><td>-0.89607</td><td>0.00023</td></tr> <tr><td>O</td><td>-1.08594</td><td>-0.74955</td><td>-0.00094</td></tr> <tr><td>H</td><td>1.26132</td><td>-1.40978</td><td>0.00209</td></tr> <tr><td>H</td><td>3.59931</td><td>-0.79183</td><td>0.87954</td></tr> <tr><td>H</td><td>-2.94981</td><td>-0.42969</td><td>-0.88682</td></tr> <tr><td>C</td><td>-0.63970</td><td>0.53251</td><td>-0.00024</td></tr> <tr><td>C</td><td>1.67815</td><td>-0.40417</td><td>0.00058</td></tr> <tr><td>O</td><td>-1.38409</td><td>1.49408</td><td>0.00081</td></tr> <tr><td>C</td><td>0.83493</td><td>0.63663</td><td>-0.00094</td></tr> <tr><td>C</td><td>3.17121</td><td>-0.29214</td><td>0.00024</td></tr> <tr><td>H</td><td>1.19775</td><td>1.66130</td><td>-0.00215</td></tr> <tr><td>H</td><td>3.50269</td><td>0.75086</td><td>0.00026</td></tr> <tr><td>H</td><td>3.59868</td><td>-0.79145</td><td>-0.87962</td></tr> </table> | H        | -2.94777 | -0.43494 | 0.89106 | H | -2.69654 | -1.97114 | -0.00264 | C | -2.51214 | -0.89607 | 0.00023 | O | -1.08594 | -0.74955 | -0.00094 | H | 1.26132 | -1.40978 | 0.00209 | H | 3.59931 | -0.79183 | 0.87954 | H | -2.94981 | -0.42969 | -0.88682 | C | -0.63970 | 0.53251 | -0.00024 | C | 1.67815 | -0.40417 | 0.00058 | O | -1.38409 | 1.49408 | 0.00081 | C | 0.83493 | 0.63663 | -0.00094 | C | 3.17121 | -0.29214 | 0.00024 | H | 1.19775 | 1.66130 | -0.00215 | H | 3.50269 | 0.75086 | 0.00026 | H | 3.59868 | -0.79145 | -0.87962 |
| H                                        | -2.94777                                                                                                                                                                                                                                                                                                                                                                                                                                                                                                                                                                                                                                                                                                                                                                                                                                                                                                                                                                                                                                                                                                                                                         | -0.43494 | 0.89106  |          |         |   |          |          |          |   |          |          |         |   |          |          |          |   |         |          |         |   |         |          |         |   |          |          |          |   |          |         |          |   |         |          |         |   |          |         |         |   |         |         |          |   |         |          |         |   |         |         |          |   |         |         |         |   |         |          |          |
| H                                        | -2.69654                                                                                                                                                                                                                                                                                                                                                                                                                                                                                                                                                                                                                                                                                                                                                                                                                                                                                                                                                                                                                                                                                                                                                         | -1.97114 | -0.00264 |          |         |   |          |          |          |   |          |          |         |   |          |          |          |   |         |          |         |   |         |          |         |   |          |          |          |   |          |         |          |   |         |          |         |   |          |         |         |   |         |         |          |   |         |          |         |   |         |         |          |   |         |         |         |   |         |          |          |
| C                                        | -2.51214                                                                                                                                                                                                                                                                                                                                                                                                                                                                                                                                                                                                                                                                                                                                                                                                                                                                                                                                                                                                                                                                                                                                                         | -0.89607 | 0.00023  |          |         |   |          |          |          |   |          |          |         |   |          |          |          |   |         |          |         |   |         |          |         |   |          |          |          |   |          |         |          |   |         |          |         |   |          |         |         |   |         |         |          |   |         |          |         |   |         |         |          |   |         |         |         |   |         |          |          |
| O                                        | -1.08594                                                                                                                                                                                                                                                                                                                                                                                                                                                                                                                                                                                                                                                                                                                                                                                                                                                                                                                                                                                                                                                                                                                                                         | -0.74955 | -0.00094 |          |         |   |          |          |          |   |          |          |         |   |          |          |          |   |         |          |         |   |         |          |         |   |          |          |          |   |          |         |          |   |         |          |         |   |          |         |         |   |         |         |          |   |         |          |         |   |         |         |          |   |         |         |         |   |         |          |          |
| H                                        | 1.26132                                                                                                                                                                                                                                                                                                                                                                                                                                                                                                                                                                                                                                                                                                                                                                                                                                                                                                                                                                                                                                                                                                                                                          | -1.40978 | 0.00209  |          |         |   |          |          |          |   |          |          |         |   |          |          |          |   |         |          |         |   |         |          |         |   |          |          |          |   |          |         |          |   |         |          |         |   |          |         |         |   |         |         |          |   |         |          |         |   |         |         |          |   |         |         |         |   |         |          |          |
| H                                        | 3.59931                                                                                                                                                                                                                                                                                                                                                                                                                                                                                                                                                                                                                                                                                                                                                                                                                                                                                                                                                                                                                                                                                                                                                          | -0.79183 | 0.87954  |          |         |   |          |          |          |   |          |          |         |   |          |          |          |   |         |          |         |   |         |          |         |   |          |          |          |   |          |         |          |   |         |          |         |   |          |         |         |   |         |         |          |   |         |          |         |   |         |         |          |   |         |         |         |   |         |          |          |
| H                                        | -2.94981                                                                                                                                                                                                                                                                                                                                                                                                                                                                                                                                                                                                                                                                                                                                                                                                                                                                                                                                                                                                                                                                                                                                                         | -0.42969 | -0.88682 |          |         |   |          |          |          |   |          |          |         |   |          |          |          |   |         |          |         |   |         |          |         |   |          |          |          |   |          |         |          |   |         |          |         |   |          |         |         |   |         |         |          |   |         |          |         |   |         |         |          |   |         |         |         |   |         |          |          |
| C                                        | -0.63970                                                                                                                                                                                                                                                                                                                                                                                                                                                                                                                                                                                                                                                                                                                                                                                                                                                                                                                                                                                                                                                                                                                                                         | 0.53251  | -0.00024 |          |         |   |          |          |          |   |          |          |         |   |          |          |          |   |         |          |         |   |         |          |         |   |          |          |          |   |          |         |          |   |         |          |         |   |          |         |         |   |         |         |          |   |         |          |         |   |         |         |          |   |         |         |         |   |         |          |          |
| C                                        | 1.67815                                                                                                                                                                                                                                                                                                                                                                                                                                                                                                                                                                                                                                                                                                                                                                                                                                                                                                                                                                                                                                                                                                                                                          | -0.40417 | 0.00058  |          |         |   |          |          |          |   |          |          |         |   |          |          |          |   |         |          |         |   |         |          |         |   |          |          |          |   |          |         |          |   |         |          |         |   |          |         |         |   |         |         |          |   |         |          |         |   |         |         |          |   |         |         |         |   |         |          |          |
| O                                        | -1.38409                                                                                                                                                                                                                                                                                                                                                                                                                                                                                                                                                                                                                                                                                                                                                                                                                                                                                                                                                                                                                                                                                                                                                         | 1.49408  | 0.00081  |          |         |   |          |          |          |   |          |          |         |   |          |          |          |   |         |          |         |   |         |          |         |   |          |          |          |   |          |         |          |   |         |          |         |   |          |         |         |   |         |         |          |   |         |          |         |   |         |         |          |   |         |         |         |   |         |          |          |
| C                                        | 0.83493                                                                                                                                                                                                                                                                                                                                                                                                                                                                                                                                                                                                                                                                                                                                                                                                                                                                                                                                                                                                                                                                                                                                                          | 0.63663  | -0.00094 |          |         |   |          |          |          |   |          |          |         |   |          |          |          |   |         |          |         |   |         |          |         |   |          |          |          |   |          |         |          |   |         |          |         |   |          |         |         |   |         |         |          |   |         |          |         |   |         |         |          |   |         |         |         |   |         |          |          |
| C                                        | 3.17121                                                                                                                                                                                                                                                                                                                                                                                                                                                                                                                                                                                                                                                                                                                                                                                                                                                                                                                                                                                                                                                                                                                                                          | -0.29214 | 0.00024  |          |         |   |          |          |          |   |          |          |         |   |          |          |          |   |         |          |         |   |         |          |         |   |          |          |          |   |          |         |          |   |         |          |         |   |          |         |         |   |         |         |          |   |         |          |         |   |         |         |          |   |         |         |         |   |         |          |          |
| H                                        | 1.19775                                                                                                                                                                                                                                                                                                                                                                                                                                                                                                                                                                                                                                                                                                                                                                                                                                                                                                                                                                                                                                                                                                                                                          | 1.66130  | -0.00215 |          |         |   |          |          |          |   |          |          |         |   |          |          |          |   |         |          |         |   |         |          |         |   |          |          |          |   |          |         |          |   |         |          |         |   |          |         |         |   |         |         |          |   |         |          |         |   |         |         |          |   |         |         |         |   |         |          |          |
| H                                        | 3.50269                                                                                                                                                                                                                                                                                                                                                                                                                                                                                                                                                                                                                                                                                                                                                                                                                                                                                                                                                                                                                                                                                                                                                          | 0.75086  | 0.00026  |          |         |   |          |          |          |   |          |          |         |   |          |          |          |   |         |          |         |   |         |          |         |   |          |          |          |   |          |         |          |   |         |          |         |   |          |         |         |   |         |         |          |   |         |          |         |   |         |         |          |   |         |         |         |   |         |          |          |
| H                                        | 3.59868                                                                                                                                                                                                                                                                                                                                                                                                                                                                                                                                                                                                                                                                                                                                                                                                                                                                                                                                                                                                                                                                                                                                                          | -0.79145 | -0.87962 |          |         |   |          |          |          |   |          |          |         |   |          |          |          |   |         |          |         |   |         |          |         |   |          |          |          |   |          |         |          |   |         |          |         |   |          |         |         |   |         |         |          |   |         |          |         |   |         |         |          |   |         |         |         |   |         |          |          |

Optimized Molecular Properties for **Methyl Acrylate•DiGly** Complex

|                                                |                                                                                                                                                                                                                                                                                                                                                                                                                                                                                                                                                                                                                                                                                                                                                                                                                                                                                                                                                                                                                                                                                                                                                                                                                                                                                                                                                                                                                                                      |
|------------------------------------------------|------------------------------------------------------------------------------------------------------------------------------------------------------------------------------------------------------------------------------------------------------------------------------------------------------------------------------------------------------------------------------------------------------------------------------------------------------------------------------------------------------------------------------------------------------------------------------------------------------------------------------------------------------------------------------------------------------------------------------------------------------------------------------------------------------------------------------------------------------------------------------------------------------------------------------------------------------------------------------------------------------------------------------------------------------------------------------------------------------------------------------------------------------------------------------------------------------------------------------------------------------------------------------------------------------------------------------------------------------------------------------------------------------------------------------------------------------|
| Number of<br>(-)<br>Vibrational<br>Frequencies | 0                                                                                                                                                                                                                                                                                                                                                                                                                                                                                                                                                                                                                                                                                                                                                                                                                                                                                                                                                                                                                                                                                                                                                                                                                                                                                                                                                                                                                                                    |
| Absolute<br>Energies<br>(Hartrees)             | <p><b>B3LYP/6-31G(d)</b></p> <p>There are 11 positive frequencies below 100 cm<sup>-1</sup>.</p> <p>Zero-point correction: 0.284453 hartree<br/>         Enthalpy correction: 0.306280 hartree<br/>         Free Energy correction: 0.228945 hartree<br/>         Quasiharmonic Free Energy correction: 0.236897 hartree</p> <p>SCF Energy: -802.334825 hartree<br/>         SCF Energy + ZPVE: -802.050372 hartree<br/>         Enthalpy: -802.028545 hartree<br/>         Free Energy: -802.105880 hartree</p> <p>Free Energy with quasiharmonic correction: -802.097927 hartree<br/>         (correction: 4.99 kcal/mol)</p> <p><b>B3LYP-D3/6-311+G(d,p)</b></p> <p>SCF Done: E(RB3LYP) = -802.612185248 A.U.</p> <p><b>B3LYP/6-31G(d) (PCM)</b></p> <p>There are 9 positive frequencies below 100 cm<sup>-1</sup>.</p> <p>Zero-point correction: 0.284879 hartree<br/>         Enthalpy correction: 0.306331 hartree<br/>         Free Energy correction: 0.234683 hartree<br/>         Quasiharmonic Free Energy correction: 0.240670 hartree</p> <p>SCF Energy: -802.352162 hartree<br/>         SCF Energy + ZPVE: -802.067283 hartree<br/>         Enthalpy: -802.045831 hartree<br/>         Free Energy: -802.117479 hartree</p> <p>Free Energy with quasiharmonic correction: -802.111493 hartree<br/>         (correction: 3.76 kcal/mol)</p> <p><b>B3LYP-D3/6-311+G(d,p) (PCM)</b></p> <p>SCF Done: E(RB3LYP) = -802.630798909 A.U.</p> |
| Cartesian<br>Coordinates                       | <p>34<br/>         spD3-substrate-diGly.out Energy: -503646.7461779</p> <p>C -3.78175 -0.60761 1.10974<br/>         C -2.27054 0.72668 -0.35511<br/>         O -1.17874 0.88507 -0.88951<br/>         C -2.60646 -0.43404 0.48840<br/>         H -1.80499 -1.16244 0.57969<br/>         O -3.27397 1.61197 -0.49445</p>                                                                                                                                                                                                                                                                                                                                                                                                                                                                                                                                                                                                                                                                                                                                                                                                                                                                                                                                                                                                                                                                                                                              |

|                           |          |                         |          |
|---------------------------|----------|-------------------------|----------|
| C                         | -2.98204 | 2.76724                 | -1.29931 |
| H                         | -3.89525 | 3.36236                 | -1.29291 |
| H                         | -2.72399 | 2.46864                 | -2.31853 |
| H                         | -2.15057 | 3.33214                 | -0.87046 |
| H                         | -4.55063 | 0.15330                 | 0.98792  |
| C                         | -4.12379 | -1.78104                | 1.97175  |
| H                         | -4.38211 | -1.45157                | 2.98689  |
| H                         | -5.00749 | -2.30258                | 1.58078  |
| H                         | -3.29878 | -2.49633                | 2.03827  |
| C                         | 2.75595  | 0.48737                 | 1.18651  |
| O                         | 3.09568  | 0.85069                 | 2.30700  |
| C                         | 1.83347  | -0.72746                | 1.01395  |
| N                         | 1.18117  | -0.85284                | -0.27653 |
| H                         | 2.43450  | -1.63077                | 1.15799  |
| H                         | 1.10068  | -0.67933                | 1.82663  |
| H                         | 0.41026  | -0.22329                | -0.49404 |
| C                         | 1.41264  | -1.92707                | -1.10175 |
| O                         | 2.23801  | -2.79716                | -0.85293 |
| C                         | 0.57609  | -1.94996                | -2.37386 |
| H                         | 0.04693  | -2.90652                | -2.42776 |
| H                         | 1.24643  | -1.90508                | -3.23852 |
| H                         | -0.14550 | -1.13066                | -2.43488 |
| N                         | 3.16550  | 1.07722                 | 0.03133  |
| H                         | 2.82767  | 0.68099                 | -0.83450 |
| C                         | 4.09119  | 2.19191                 | 0.00508  |
| H                         | 3.66233  | 3.04991                 | -0.52647 |
| H                         | 4.29014  | 2.47356                 | 1.04047  |
| H                         | 5.03717  | 1.91633                 | -0.47746 |
| (PCM)                     |          |                         |          |
| 34                        |          |                         |          |
| spD3-opt-substrate-ox.out |          | Energy: -503658.4264264 |          |
| H                         | -4.52688 | 2.19823                 | -1.16939 |
| C                         | -3.43925 | 2.08555                 | -1.13190 |
| H                         | -2.99103 | 3.01617                 | -0.78117 |
| H                         | -3.07282 | 1.87852                 | -2.14569 |
| H                         | -1.51111 | -3.10170                | -1.94406 |
| N                         | -3.08095 | 1.02712                 | -0.20367 |
| H                         | -3.50638 | 0.10636                 | -0.30074 |
| O                         | -3.19298 | -1.90302                | -0.22179 |
| O                         | -1.30345 | 2.11058                 | 0.75271  |
| C                         | -2.01921 | 1.11143                 | 0.63158  |
| H                         | 3.74574  | -2.51357                | -0.88486 |
| C                         | -1.96305 | -2.04319                | -0.13961 |
| H                         | -2.69038 | -0.53239                | 1.88561  |
| C                         | -1.23570 | -3.14576                | -0.88608 |
| H                         | -0.14900 | -3.08059                | -0.78916 |
| C                         | -1.75772 | -0.17265                | 1.43970  |
| N                         | -1.18898 | -1.24162                | 0.62890  |
| O                         | 1.74287  | -1.36443                | 0.40728  |
| C                         | 4.27148  | -1.88340                | -0.16328 |
| H                         | -0.17212 | -1.32494                | 0.59169  |
| H                         | -1.57056 | -4.11484                | -0.50079 |
| H                         | 5.32364  | -1.79150                | -0.43156 |
| C                         | 2.44965  | -0.40238                | 0.11347  |
| H                         | 4.16676  | -2.31311                | 0.83590  |

|   |          |          |          |
|---|----------|----------|----------|
| O | 3.75143  | -0.54174 | -0.19211 |
| H | -1.05246 | 0.07467  | 2.23424  |
| H | 0.91881  | 1.11672  | 0.33964  |
| C | 1.96188  | 0.98462  | 0.06507  |
| C | 2.70811  | 2.04212  | -0.29017 |
| H | 2.32469  | 3.86390  | -1.35128 |
| H | 3.75134  | 1.88739  | -0.56028 |
| H | 1.13487  | 3.49824  | -0.07449 |
| C | 2.19342  | 3.44551  | -0.34439 |
| H | 2.76588  | 4.09154  | 0.33477  |

Optimized Molecular Properties for **Methyl Acrylate•GlySer** Complex

|                                                |                                                                                                                                                                                                                                                                                                                                                                                                                                                                                                                                                                                                                                                                                                                                                                                                                                                                                                                                                                                                                                                                                                                                                                                                                                                                                                                                                                                                                                                                                                                                                                                                                                                                                                                                                                                                                                                                                                       |          |          |         |         |   |          |         |         |   |          |         |         |   |          |          |          |   |          |          |          |   |          |          |          |   |         |          |          |   |          |         |         |   |          |         |         |   |         |          |          |   |         |         |          |   |          |         |          |   |         |          |         |   |          |          |         |   |         |          |         |   |          |         |         |   |         |         |          |   |          |         |         |   |          |         |         |   |          |          |         |   |          |          |          |   |          |          |          |   |          |          |          |   |         |         |         |   |         |         |         |
|------------------------------------------------|-------------------------------------------------------------------------------------------------------------------------------------------------------------------------------------------------------------------------------------------------------------------------------------------------------------------------------------------------------------------------------------------------------------------------------------------------------------------------------------------------------------------------------------------------------------------------------------------------------------------------------------------------------------------------------------------------------------------------------------------------------------------------------------------------------------------------------------------------------------------------------------------------------------------------------------------------------------------------------------------------------------------------------------------------------------------------------------------------------------------------------------------------------------------------------------------------------------------------------------------------------------------------------------------------------------------------------------------------------------------------------------------------------------------------------------------------------------------------------------------------------------------------------------------------------------------------------------------------------------------------------------------------------------------------------------------------------------------------------------------------------------------------------------------------------------------------------------------------------------------------------------------------------|----------|----------|---------|---------|---|----------|---------|---------|---|----------|---------|---------|---|----------|----------|----------|---|----------|----------|----------|---|----------|----------|----------|---|---------|----------|----------|---|----------|---------|---------|---|----------|---------|---------|---|---------|----------|----------|---|---------|---------|----------|---|----------|---------|----------|---|---------|----------|---------|---|----------|----------|---------|---|---------|----------|---------|---|----------|---------|---------|---|---------|---------|----------|---|----------|---------|---------|---|----------|---------|---------|---|----------|----------|---------|---|----------|----------|----------|---|----------|----------|----------|---|----------|----------|----------|---|---------|---------|---------|---|---------|---------|---------|
| Geometry                                       |                                                                                                                                                                                                                                                                                                                                                                                                                                                                                                                                                                                                                                                                                                                                                                                                                                                                                                                                                                                                                                                                                                                                                                                                                                                                                                                                                                                                                                                                                                                                                                                                                                                                                                                                                                                                                                                                                                       |          |          |         |         |   |          |         |         |   |          |         |         |   |          |          |          |   |          |          |          |   |          |          |          |   |         |          |          |   |          |         |         |   |          |         |         |   |         |          |          |   |         |         |          |   |          |         |          |   |         |          |         |   |          |          |         |   |         |          |         |   |          |         |         |   |         |         |          |   |          |         |         |   |          |         |         |   |          |          |         |   |          |          |          |   |          |          |          |   |          |          |          |   |         |         |         |   |         |         |         |
| Number of<br>(-)<br>Vibrational<br>Frequencies | 0                                                                                                                                                                                                                                                                                                                                                                                                                                                                                                                                                                                                                                                                                                                                                                                                                                                                                                                                                                                                                                                                                                                                                                                                                                                                                                                                                                                                                                                                                                                                                                                                                                                                                                                                                                                                                                                                                                     |          |          |         |         |   |          |         |         |   |          |         |         |   |          |          |          |   |          |          |          |   |          |          |          |   |         |          |          |   |          |         |         |   |          |         |         |   |         |          |          |   |         |         |          |   |          |         |          |   |         |          |         |   |          |          |         |   |         |          |         |   |          |         |         |   |         |         |          |   |          |         |         |   |          |         |         |   |          |          |         |   |          |          |          |   |          |          |          |   |          |          |          |   |         |         |         |   |         |         |         |
| Absolute<br>Energies<br>(Hartrees)             | <p><b>B3LYP/6-31G(d)</b></p> <p>There are 10 positive frequencies below 100 cm<sup>-1</sup>.</p> <p>Zero-point correction: 0.318569 hartree<br/>         Enthalpy correction: 0.342361 hartree<br/>         Free Energy correction: 0.262606 hartree<br/>         Quasiharmonic Free Energy correction: 0.269144 hartree</p> <p>SCF Energy: -916.863216 hartree<br/>         SCF Energy + ZPVE: -916.544647 hartree<br/>         Enthalpy: -916.520855 hartree<br/>         Free Energy: -916.600610 hartree</p> <p>Free Energy with quasiharmonic correction: -916.594072 hartree<br/>         (correction: 4.10 kcal/mol)</p> <p><b>B3LYP-D3/6-311+G(d,p)</b></p> <p>SCF Done: E(RB3LYP) = -917.189874295 A.U.</p>                                                                                                                                                                                                                                                                                                                                                                                                                                                                                                                                                                                                                                                                                                                                                                                                                                                                                                                                                                                                                                                                                                                                                                                  |          |          |         |         |   |          |         |         |   |          |         |         |   |          |          |          |   |          |          |          |   |          |          |          |   |         |          |          |   |          |         |         |   |          |         |         |   |         |          |          |   |         |         |          |   |          |         |          |   |         |          |         |   |          |          |         |   |         |          |         |   |          |         |         |   |         |         |          |   |          |         |         |   |          |         |         |   |          |          |         |   |          |          |          |   |          |          |          |   |          |          |          |   |         |         |         |   |         |         |         |
| Cartesian<br>Coordinates                       | <p>38<br/>         spD3-substrate-SerGly.out Energy: -575545.3309910</p> <table> <tr><td>C</td><td>-0.93359</td><td>1.25507</td><td>1.02270</td></tr> <tr><td>O</td><td>-1.68676</td><td>2.18814</td><td>0.72649</td></tr> <tr><td>N</td><td>-0.99177</td><td>0.03991</td><td>0.42025</td></tr> <tr><td>C</td><td>-1.82796</td><td>-0.22285</td><td>-0.75728</td></tr> <tr><td>C</td><td>-3.29548</td><td>-0.52858</td><td>-0.36177</td></tr> <tr><td>O</td><td>-3.77843</td><td>-1.65040</td><td>-0.49814</td></tr> <tr><td>O</td><td>0.08167</td><td>-1.16092</td><td>-1.99516</td></tr> <tr><td>N</td><td>-3.97403</td><td>0.54899</td><td>0.10969</td></tr> <tr><td>C</td><td>-5.33753</td><td>0.45417</td><td>0.59573</td></tr> <tr><td>H</td><td>0.67553</td><td>-1.43392</td><td>-1.27262</td></tr> <tr><td>C</td><td>3.80440</td><td>1.24598</td><td>-0.89994</td></tr> <tr><td>H</td><td>-1.81177</td><td>0.68549</td><td>-1.37164</td></tr> <tr><td>C</td><td>2.73787</td><td>-0.70684</td><td>0.20963</td></tr> <tr><td>H</td><td>-0.27646</td><td>-0.64120</td><td>0.64757</td></tr> <tr><td>O</td><td>1.77646</td><td>-1.46530</td><td>0.33973</td></tr> <tr><td>H</td><td>-5.38652</td><td>0.56763</td><td>1.68664</td></tr> <tr><td>C</td><td>2.77267</td><td>0.39971</td><td>-0.76013</td></tr> <tr><td>H</td><td>-3.43147</td><td>1.39585</td><td>0.27318</td></tr> <tr><td>H</td><td>-5.96604</td><td>1.22608</td><td>0.13721</td></tr> <tr><td>H</td><td>-5.72139</td><td>-0.53071</td><td>0.32550</td></tr> <tr><td>C</td><td>-1.25250</td><td>-1.39257</td><td>-1.56769</td></tr> <tr><td>H</td><td>-1.33886</td><td>-2.31821</td><td>-0.98464</td></tr> <tr><td>H</td><td>-1.86922</td><td>-1.52361</td><td>-2.46034</td></tr> <tr><td>C</td><td>0.13012</td><td>1.41475</td><td>2.09692</td></tr> <tr><td>H</td><td>0.60427</td><td>0.47077</td><td>2.38043</td></tr> </table> | C        | -0.93359 | 1.25507 | 1.02270 | O | -1.68676 | 2.18814 | 0.72649 | N | -0.99177 | 0.03991 | 0.42025 | C | -1.82796 | -0.22285 | -0.75728 | C | -3.29548 | -0.52858 | -0.36177 | O | -3.77843 | -1.65040 | -0.49814 | O | 0.08167 | -1.16092 | -1.99516 | N | -3.97403 | 0.54899 | 0.10969 | C | -5.33753 | 0.45417 | 0.59573 | H | 0.67553 | -1.43392 | -1.27262 | C | 3.80440 | 1.24598 | -0.89994 | H | -1.81177 | 0.68549 | -1.37164 | C | 2.73787 | -0.70684 | 0.20963 | H | -0.27646 | -0.64120 | 0.64757 | O | 1.77646 | -1.46530 | 0.33973 | H | -5.38652 | 0.56763 | 1.68664 | C | 2.77267 | 0.39971 | -0.76013 | H | -3.43147 | 1.39585 | 0.27318 | H | -5.96604 | 1.22608 | 0.13721 | H | -5.72139 | -0.53071 | 0.32550 | C | -1.25250 | -1.39257 | -1.56769 | H | -1.33886 | -2.31821 | -0.98464 | H | -1.86922 | -1.52361 | -2.46034 | C | 0.13012 | 1.41475 | 2.09692 | H | 0.60427 | 0.47077 | 2.38043 |
| C                                              | -0.93359                                                                                                                                                                                                                                                                                                                                                                                                                                                                                                                                                                                                                                                                                                                                                                                                                                                                                                                                                                                                                                                                                                                                                                                                                                                                                                                                                                                                                                                                                                                                                                                                                                                                                                                                                                                                                                                                                              | 1.25507  | 1.02270  |         |         |   |          |         |         |   |          |         |         |   |          |          |          |   |          |          |          |   |          |          |          |   |         |          |          |   |          |         |         |   |          |         |         |   |         |          |          |   |         |         |          |   |          |         |          |   |         |          |         |   |          |          |         |   |         |          |         |   |          |         |         |   |         |         |          |   |          |         |         |   |          |         |         |   |          |          |         |   |          |          |          |   |          |          |          |   |          |          |          |   |         |         |         |   |         |         |         |
| O                                              | -1.68676                                                                                                                                                                                                                                                                                                                                                                                                                                                                                                                                                                                                                                                                                                                                                                                                                                                                                                                                                                                                                                                                                                                                                                                                                                                                                                                                                                                                                                                                                                                                                                                                                                                                                                                                                                                                                                                                                              | 2.18814  | 0.72649  |         |         |   |          |         |         |   |          |         |         |   |          |          |          |   |          |          |          |   |          |          |          |   |         |          |          |   |          |         |         |   |          |         |         |   |         |          |          |   |         |         |          |   |          |         |          |   |         |          |         |   |          |          |         |   |         |          |         |   |          |         |         |   |         |         |          |   |          |         |         |   |          |         |         |   |          |          |         |   |          |          |          |   |          |          |          |   |          |          |          |   |         |         |         |   |         |         |         |
| N                                              | -0.99177                                                                                                                                                                                                                                                                                                                                                                                                                                                                                                                                                                                                                                                                                                                                                                                                                                                                                                                                                                                                                                                                                                                                                                                                                                                                                                                                                                                                                                                                                                                                                                                                                                                                                                                                                                                                                                                                                              | 0.03991  | 0.42025  |         |         |   |          |         |         |   |          |         |         |   |          |          |          |   |          |          |          |   |          |          |          |   |         |          |          |   |          |         |         |   |          |         |         |   |         |          |          |   |         |         |          |   |          |         |          |   |         |          |         |   |          |          |         |   |         |          |         |   |          |         |         |   |         |         |          |   |          |         |         |   |          |         |         |   |          |          |         |   |          |          |          |   |          |          |          |   |          |          |          |   |         |         |         |   |         |         |         |
| C                                              | -1.82796                                                                                                                                                                                                                                                                                                                                                                                                                                                                                                                                                                                                                                                                                                                                                                                                                                                                                                                                                                                                                                                                                                                                                                                                                                                                                                                                                                                                                                                                                                                                                                                                                                                                                                                                                                                                                                                                                              | -0.22285 | -0.75728 |         |         |   |          |         |         |   |          |         |         |   |          |          |          |   |          |          |          |   |          |          |          |   |         |          |          |   |          |         |         |   |          |         |         |   |         |          |          |   |         |         |          |   |          |         |          |   |         |          |         |   |          |          |         |   |         |          |         |   |          |         |         |   |         |         |          |   |          |         |         |   |          |         |         |   |          |          |         |   |          |          |          |   |          |          |          |   |          |          |          |   |         |         |         |   |         |         |         |
| C                                              | -3.29548                                                                                                                                                                                                                                                                                                                                                                                                                                                                                                                                                                                                                                                                                                                                                                                                                                                                                                                                                                                                                                                                                                                                                                                                                                                                                                                                                                                                                                                                                                                                                                                                                                                                                                                                                                                                                                                                                              | -0.52858 | -0.36177 |         |         |   |          |         |         |   |          |         |         |   |          |          |          |   |          |          |          |   |          |          |          |   |         |          |          |   |          |         |         |   |          |         |         |   |         |          |          |   |         |         |          |   |          |         |          |   |         |          |         |   |          |          |         |   |         |          |         |   |          |         |         |   |         |         |          |   |          |         |         |   |          |         |         |   |          |          |         |   |          |          |          |   |          |          |          |   |          |          |          |   |         |         |         |   |         |         |         |
| O                                              | -3.77843                                                                                                                                                                                                                                                                                                                                                                                                                                                                                                                                                                                                                                                                                                                                                                                                                                                                                                                                                                                                                                                                                                                                                                                                                                                                                                                                                                                                                                                                                                                                                                                                                                                                                                                                                                                                                                                                                              | -1.65040 | -0.49814 |         |         |   |          |         |         |   |          |         |         |   |          |          |          |   |          |          |          |   |          |          |          |   |         |          |          |   |          |         |         |   |          |         |         |   |         |          |          |   |         |         |          |   |          |         |          |   |         |          |         |   |          |          |         |   |         |          |         |   |          |         |         |   |         |         |          |   |          |         |         |   |          |         |         |   |          |          |         |   |          |          |          |   |          |          |          |   |          |          |          |   |         |         |         |   |         |         |         |
| O                                              | 0.08167                                                                                                                                                                                                                                                                                                                                                                                                                                                                                                                                                                                                                                                                                                                                                                                                                                                                                                                                                                                                                                                                                                                                                                                                                                                                                                                                                                                                                                                                                                                                                                                                                                                                                                                                                                                                                                                                                               | -1.16092 | -1.99516 |         |         |   |          |         |         |   |          |         |         |   |          |          |          |   |          |          |          |   |          |          |          |   |         |          |          |   |          |         |         |   |          |         |         |   |         |          |          |   |         |         |          |   |          |         |          |   |         |          |         |   |          |          |         |   |         |          |         |   |          |         |         |   |         |         |          |   |          |         |         |   |          |         |         |   |          |          |         |   |          |          |          |   |          |          |          |   |          |          |          |   |         |         |         |   |         |         |         |
| N                                              | -3.97403                                                                                                                                                                                                                                                                                                                                                                                                                                                                                                                                                                                                                                                                                                                                                                                                                                                                                                                                                                                                                                                                                                                                                                                                                                                                                                                                                                                                                                                                                                                                                                                                                                                                                                                                                                                                                                                                                              | 0.54899  | 0.10969  |         |         |   |          |         |         |   |          |         |         |   |          |          |          |   |          |          |          |   |          |          |          |   |         |          |          |   |          |         |         |   |          |         |         |   |         |          |          |   |         |         |          |   |          |         |          |   |         |          |         |   |          |          |         |   |         |          |         |   |          |         |         |   |         |         |          |   |          |         |         |   |          |         |         |   |          |          |         |   |          |          |          |   |          |          |          |   |          |          |          |   |         |         |         |   |         |         |         |
| C                                              | -5.33753                                                                                                                                                                                                                                                                                                                                                                                                                                                                                                                                                                                                                                                                                                                                                                                                                                                                                                                                                                                                                                                                                                                                                                                                                                                                                                                                                                                                                                                                                                                                                                                                                                                                                                                                                                                                                                                                                              | 0.45417  | 0.59573  |         |         |   |          |         |         |   |          |         |         |   |          |          |          |   |          |          |          |   |          |          |          |   |         |          |          |   |          |         |         |   |          |         |         |   |         |          |          |   |         |         |          |   |          |         |          |   |         |          |         |   |          |          |         |   |         |          |         |   |          |         |         |   |         |         |          |   |          |         |         |   |          |         |         |   |          |          |         |   |          |          |          |   |          |          |          |   |          |          |          |   |         |         |         |   |         |         |         |
| H                                              | 0.67553                                                                                                                                                                                                                                                                                                                                                                                                                                                                                                                                                                                                                                                                                                                                                                                                                                                                                                                                                                                                                                                                                                                                                                                                                                                                                                                                                                                                                                                                                                                                                                                                                                                                                                                                                                                                                                                                                               | -1.43392 | -1.27262 |         |         |   |          |         |         |   |          |         |         |   |          |          |          |   |          |          |          |   |          |          |          |   |         |          |          |   |          |         |         |   |          |         |         |   |         |          |          |   |         |         |          |   |          |         |          |   |         |          |         |   |          |          |         |   |         |          |         |   |          |         |         |   |         |         |          |   |          |         |         |   |          |         |         |   |          |          |         |   |          |          |          |   |          |          |          |   |          |          |          |   |         |         |         |   |         |         |         |
| C                                              | 3.80440                                                                                                                                                                                                                                                                                                                                                                                                                                                                                                                                                                                                                                                                                                                                                                                                                                                                                                                                                                                                                                                                                                                                                                                                                                                                                                                                                                                                                                                                                                                                                                                                                                                                                                                                                                                                                                                                                               | 1.24598  | -0.89994 |         |         |   |          |         |         |   |          |         |         |   |          |          |          |   |          |          |          |   |          |          |          |   |         |          |          |   |          |         |         |   |          |         |         |   |         |          |          |   |         |         |          |   |          |         |          |   |         |          |         |   |          |          |         |   |         |          |         |   |          |         |         |   |         |         |          |   |          |         |         |   |          |         |         |   |          |          |         |   |          |          |          |   |          |          |          |   |          |          |          |   |         |         |         |   |         |         |         |
| H                                              | -1.81177                                                                                                                                                                                                                                                                                                                                                                                                                                                                                                                                                                                                                                                                                                                                                                                                                                                                                                                                                                                                                                                                                                                                                                                                                                                                                                                                                                                                                                                                                                                                                                                                                                                                                                                                                                                                                                                                                              | 0.68549  | -1.37164 |         |         |   |          |         |         |   |          |         |         |   |          |          |          |   |          |          |          |   |          |          |          |   |         |          |          |   |          |         |         |   |          |         |         |   |         |          |          |   |         |         |          |   |          |         |          |   |         |          |         |   |          |          |         |   |         |          |         |   |          |         |         |   |         |         |          |   |          |         |         |   |          |         |         |   |          |          |         |   |          |          |          |   |          |          |          |   |          |          |          |   |         |         |         |   |         |         |         |
| C                                              | 2.73787                                                                                                                                                                                                                                                                                                                                                                                                                                                                                                                                                                                                                                                                                                                                                                                                                                                                                                                                                                                                                                                                                                                                                                                                                                                                                                                                                                                                                                                                                                                                                                                                                                                                                                                                                                                                                                                                                               | -0.70684 | 0.20963  |         |         |   |          |         |         |   |          |         |         |   |          |          |          |   |          |          |          |   |          |          |          |   |         |          |          |   |          |         |         |   |          |         |         |   |         |          |          |   |         |         |          |   |          |         |          |   |         |          |         |   |          |          |         |   |         |          |         |   |          |         |         |   |         |         |          |   |          |         |         |   |          |         |         |   |          |          |         |   |          |          |          |   |          |          |          |   |          |          |          |   |         |         |         |   |         |         |         |
| H                                              | -0.27646                                                                                                                                                                                                                                                                                                                                                                                                                                                                                                                                                                                                                                                                                                                                                                                                                                                                                                                                                                                                                                                                                                                                                                                                                                                                                                                                                                                                                                                                                                                                                                                                                                                                                                                                                                                                                                                                                              | -0.64120 | 0.64757  |         |         |   |          |         |         |   |          |         |         |   |          |          |          |   |          |          |          |   |          |          |          |   |         |          |          |   |          |         |         |   |          |         |         |   |         |          |          |   |         |         |          |   |          |         |          |   |         |          |         |   |          |          |         |   |         |          |         |   |          |         |         |   |         |         |          |   |          |         |         |   |          |         |         |   |          |          |         |   |          |          |          |   |          |          |          |   |          |          |          |   |         |         |         |   |         |         |         |
| O                                              | 1.77646                                                                                                                                                                                                                                                                                                                                                                                                                                                                                                                                                                                                                                                                                                                                                                                                                                                                                                                                                                                                                                                                                                                                                                                                                                                                                                                                                                                                                                                                                                                                                                                                                                                                                                                                                                                                                                                                                               | -1.46530 | 0.33973  |         |         |   |          |         |         |   |          |         |         |   |          |          |          |   |          |          |          |   |          |          |          |   |         |          |          |   |          |         |         |   |          |         |         |   |         |          |          |   |         |         |          |   |          |         |          |   |         |          |         |   |          |          |         |   |         |          |         |   |          |         |         |   |         |         |          |   |          |         |         |   |          |         |         |   |          |          |         |   |          |          |          |   |          |          |          |   |          |          |          |   |         |         |         |   |         |         |         |
| H                                              | -5.38652                                                                                                                                                                                                                                                                                                                                                                                                                                                                                                                                                                                                                                                                                                                                                                                                                                                                                                                                                                                                                                                                                                                                                                                                                                                                                                                                                                                                                                                                                                                                                                                                                                                                                                                                                                                                                                                                                              | 0.56763  | 1.68664  |         |         |   |          |         |         |   |          |         |         |   |          |          |          |   |          |          |          |   |          |          |          |   |         |          |          |   |          |         |         |   |          |         |         |   |         |          |          |   |         |         |          |   |          |         |          |   |         |          |         |   |          |          |         |   |         |          |         |   |          |         |         |   |         |         |          |   |          |         |         |   |          |         |         |   |          |          |         |   |          |          |          |   |          |          |          |   |          |          |          |   |         |         |         |   |         |         |         |
| C                                              | 2.77267                                                                                                                                                                                                                                                                                                                                                                                                                                                                                                                                                                                                                                                                                                                                                                                                                                                                                                                                                                                                                                                                                                                                                                                                                                                                                                                                                                                                                                                                                                                                                                                                                                                                                                                                                                                                                                                                                               | 0.39971  | -0.76013 |         |         |   |          |         |         |   |          |         |         |   |          |          |          |   |          |          |          |   |          |          |          |   |         |          |          |   |          |         |         |   |          |         |         |   |         |          |          |   |         |         |          |   |          |         |          |   |         |          |         |   |          |          |         |   |         |          |         |   |          |         |         |   |         |         |          |   |          |         |         |   |          |         |         |   |          |          |         |   |          |          |          |   |          |          |          |   |          |          |          |   |         |         |         |   |         |         |         |
| H                                              | -3.43147                                                                                                                                                                                                                                                                                                                                                                                                                                                                                                                                                                                                                                                                                                                                                                                                                                                                                                                                                                                                                                                                                                                                                                                                                                                                                                                                                                                                                                                                                                                                                                                                                                                                                                                                                                                                                                                                                              | 1.39585  | 0.27318  |         |         |   |          |         |         |   |          |         |         |   |          |          |          |   |          |          |          |   |          |          |          |   |         |          |          |   |          |         |         |   |          |         |         |   |         |          |          |   |         |         |          |   |          |         |          |   |         |          |         |   |          |          |         |   |         |          |         |   |          |         |         |   |         |         |          |   |          |         |         |   |          |         |         |   |          |          |         |   |          |          |          |   |          |          |          |   |          |          |          |   |         |         |         |   |         |         |         |
| H                                              | -5.96604                                                                                                                                                                                                                                                                                                                                                                                                                                                                                                                                                                                                                                                                                                                                                                                                                                                                                                                                                                                                                                                                                                                                                                                                                                                                                                                                                                                                                                                                                                                                                                                                                                                                                                                                                                                                                                                                                              | 1.22608  | 0.13721  |         |         |   |          |         |         |   |          |         |         |   |          |          |          |   |          |          |          |   |          |          |          |   |         |          |          |   |          |         |         |   |          |         |         |   |         |          |          |   |         |         |          |   |          |         |          |   |         |          |         |   |          |          |         |   |         |          |         |   |          |         |         |   |         |         |          |   |          |         |         |   |          |         |         |   |          |          |         |   |          |          |          |   |          |          |          |   |          |          |          |   |         |         |         |   |         |         |         |
| H                                              | -5.72139                                                                                                                                                                                                                                                                                                                                                                                                                                                                                                                                                                                                                                                                                                                                                                                                                                                                                                                                                                                                                                                                                                                                                                                                                                                                                                                                                                                                                                                                                                                                                                                                                                                                                                                                                                                                                                                                                              | -0.53071 | 0.32550  |         |         |   |          |         |         |   |          |         |         |   |          |          |          |   |          |          |          |   |          |          |          |   |         |          |          |   |          |         |         |   |          |         |         |   |         |          |          |   |         |         |          |   |          |         |          |   |         |          |         |   |          |          |         |   |         |          |         |   |          |         |         |   |         |         |          |   |          |         |         |   |          |         |         |   |          |          |         |   |          |          |          |   |          |          |          |   |          |          |          |   |         |         |         |   |         |         |         |
| C                                              | -1.25250                                                                                                                                                                                                                                                                                                                                                                                                                                                                                                                                                                                                                                                                                                                                                                                                                                                                                                                                                                                                                                                                                                                                                                                                                                                                                                                                                                                                                                                                                                                                                                                                                                                                                                                                                                                                                                                                                              | -1.39257 | -1.56769 |         |         |   |          |         |         |   |          |         |         |   |          |          |          |   |          |          |          |   |          |          |          |   |         |          |          |   |          |         |         |   |          |         |         |   |         |          |          |   |         |         |          |   |          |         |          |   |         |          |         |   |          |          |         |   |         |          |         |   |          |         |         |   |         |         |          |   |          |         |         |   |          |         |         |   |          |          |         |   |          |          |          |   |          |          |          |   |          |          |          |   |         |         |         |   |         |         |         |
| H                                              | -1.33886                                                                                                                                                                                                                                                                                                                                                                                                                                                                                                                                                                                                                                                                                                                                                                                                                                                                                                                                                                                                                                                                                                                                                                                                                                                                                                                                                                                                                                                                                                                                                                                                                                                                                                                                                                                                                                                                                              | -2.31821 | -0.98464 |         |         |   |          |         |         |   |          |         |         |   |          |          |          |   |          |          |          |   |          |          |          |   |         |          |          |   |          |         |         |   |          |         |         |   |         |          |          |   |         |         |          |   |          |         |          |   |         |          |         |   |          |          |         |   |         |          |         |   |          |         |         |   |         |         |          |   |          |         |         |   |          |         |         |   |          |          |         |   |          |          |          |   |          |          |          |   |          |          |          |   |         |         |         |   |         |         |         |
| H                                              | -1.86922                                                                                                                                                                                                                                                                                                                                                                                                                                                                                                                                                                                                                                                                                                                                                                                                                                                                                                                                                                                                                                                                                                                                                                                                                                                                                                                                                                                                                                                                                                                                                                                                                                                                                                                                                                                                                                                                                              | -1.52361 | -2.46034 |         |         |   |          |         |         |   |          |         |         |   |          |          |          |   |          |          |          |   |          |          |          |   |         |          |          |   |          |         |         |   |          |         |         |   |         |          |          |   |         |         |          |   |          |         |          |   |         |          |         |   |          |          |         |   |         |          |         |   |          |         |         |   |         |         |          |   |          |         |         |   |          |         |         |   |          |          |         |   |          |          |          |   |          |          |          |   |          |          |          |   |         |         |         |   |         |         |         |
| C                                              | 0.13012                                                                                                                                                                                                                                                                                                                                                                                                                                                                                                                                                                                                                                                                                                                                                                                                                                                                                                                                                                                                                                                                                                                                                                                                                                                                                                                                                                                                                                                                                                                                                                                                                                                                                                                                                                                                                                                                                               | 1.41475  | 2.09692  |         |         |   |          |         |         |   |          |         |         |   |          |          |          |   |          |          |          |   |          |          |          |   |         |          |          |   |          |         |         |   |          |         |         |   |         |          |          |   |         |         |          |   |          |         |          |   |         |          |         |   |          |          |         |   |         |          |         |   |          |         |         |   |         |         |          |   |          |         |         |   |          |         |         |   |          |          |         |   |          |          |          |   |          |          |          |   |          |          |          |   |         |         |         |   |         |         |         |
| H                                              | 0.60427                                                                                                                                                                                                                                                                                                                                                                                                                                                                                                                                                                                                                                                                                                                                                                                                                                                                                                                                                                                                                                                                                                                                                                                                                                                                                                                                                                                                                                                                                                                                                                                                                                                                                                                                                                                                                                                                                               | 0.47077  | 2.38043  |         |         |   |          |         |         |   |          |         |         |   |          |          |          |   |          |          |          |   |          |          |          |   |         |          |          |   |          |         |         |   |          |         |         |   |         |          |          |   |         |         |          |   |          |         |          |   |         |          |         |   |          |          |         |   |         |          |         |   |          |         |         |   |         |         |          |   |          |         |         |   |          |         |         |   |          |          |         |   |          |          |          |   |          |          |          |   |          |          |          |   |         |         |         |   |         |         |         |

|   |          |          |          |
|---|----------|----------|----------|
| H | -0.32577 | 1.87122  | 2.97958  |
| H | 0.90119  | 2.10198  | 1.73191  |
| O | 3.84641  | -0.83122 | 0.95603  |
| C | 3.85284  | -1.91195 | 1.90600  |
| C | 3.84942  | 2.37153  | -1.88322 |
| H | 3.98989  | 3.33041  | -1.36662 |
| H | 2.93675  | 2.42865  | -2.48308 |
| H | 4.70640  | 2.25637  | -2.56023 |
| H | 4.67718  | 1.11638  | -0.26203 |
| H | 4.83239  | -1.87125 | 2.38207  |
| H | 3.06025  | -1.77648 | 2.64646  |
| H | 3.70866  | -2.86831 | 1.39786  |
| H | 1.87914  | 0.47769  | -1.37418 |



Optimized Molecular Properties for **Methyl Acrylate•Ser•Asn** Complex

|                                                |                                                                                                                                                                                                                                                                                                                                                                                                                                                                                                                                                                                                                                                                                                                                                                                                                                                                                                                                                                                                                                                                                                                                                                                                                                                                                                                                                                                                                                                                                                                                                                                                                                                                                                                                                                                                                                                                                                                                                                                                                                                |          |          |         |          |   |          |          |          |   |          |         |          |   |          |          |         |   |          |          |         |   |         |          |          |   |         |         |         |   |          |         |          |   |         |         |         |   |         |          |          |   |          |          |         |   |          |          |         |   |          |          |         |   |          |         |          |   |          |         |          |   |          |         |         |   |          |         |          |   |         |         |         |   |         |         |         |   |         |          |          |   |         |          |          |   |         |          |          |   |         |          |          |   |         |         |          |   |         |         |         |   |         |         |         |   |         |         |         |
|------------------------------------------------|------------------------------------------------------------------------------------------------------------------------------------------------------------------------------------------------------------------------------------------------------------------------------------------------------------------------------------------------------------------------------------------------------------------------------------------------------------------------------------------------------------------------------------------------------------------------------------------------------------------------------------------------------------------------------------------------------------------------------------------------------------------------------------------------------------------------------------------------------------------------------------------------------------------------------------------------------------------------------------------------------------------------------------------------------------------------------------------------------------------------------------------------------------------------------------------------------------------------------------------------------------------------------------------------------------------------------------------------------------------------------------------------------------------------------------------------------------------------------------------------------------------------------------------------------------------------------------------------------------------------------------------------------------------------------------------------------------------------------------------------------------------------------------------------------------------------------------------------------------------------------------------------------------------------------------------------------------------------------------------------------------------------------------------------|----------|----------|---------|----------|---|----------|----------|----------|---|----------|---------|----------|---|----------|----------|---------|---|----------|----------|---------|---|---------|----------|----------|---|---------|---------|---------|---|----------|---------|----------|---|---------|---------|---------|---|---------|----------|----------|---|----------|----------|---------|---|----------|----------|---------|---|----------|----------|---------|---|----------|---------|----------|---|----------|---------|----------|---|----------|---------|---------|---|----------|---------|----------|---|---------|---------|---------|---|---------|---------|---------|---|---------|----------|----------|---|---------|----------|----------|---|---------|----------|----------|---|---------|----------|----------|---|---------|---------|----------|---|---------|---------|---------|---|---------|---------|---------|---|---------|---------|---------|
| Number of<br>(-)<br>Vibrational<br>Frequencies | 0                                                                                                                                                                                                                                                                                                                                                                                                                                                                                                                                                                                                                                                                                                                                                                                                                                                                                                                                                                                                                                                                                                                                                                                                                                                                                                                                                                                                                                                                                                                                                                                                                                                                                                                                                                                                                                                                                                                                                                                                                                              |          |          |         |          |   |          |          |          |   |          |         |          |   |          |          |         |   |          |          |         |   |         |          |          |   |         |         |         |   |          |         |          |   |         |         |         |   |         |          |          |   |          |          |         |   |          |          |         |   |          |          |         |   |          |         |          |   |          |         |          |   |          |         |         |   |          |         |          |   |         |         |         |   |         |         |         |   |         |          |          |   |         |          |          |   |         |          |          |   |         |          |          |   |         |         |          |   |         |         |         |   |         |         |         |   |         |         |         |
| Absolute<br>Energies<br>(Hartrees)             | <p><b>B3LYP/6-31G(d)</b></p> <p>There are 10 positive frequencies below 100 cm<sup>-1</sup>.</p> <p>Zero-point correction: 0.253473 hartree<br/>         Enthalpy correction: 0.274110 hartree<br/>         Free Energy correction: 0.198394 hartree<br/>         Quasiharmonic Free Energy correction: 0.207379 hartree</p> <p>SCF Energy: -670.739356 hartree<br/>         SCF Energy + ZPVE: -670.485883 hartree<br/>         Enthalpy: -670.465246 hartree<br/>         Free Energy: -670.540962 hartree</p> <p>Free Energy with quasiharmonic correction: -670.531977 hartree<br/>         (correction: 5.64 kcal/mol)</p> <p><b>B3LYP-D3/6-311+G(d,p)</b></p> <p>SCF Done: E(RB3LYP) = -670.984678740 A.U.</p>                                                                                                                                                                                                                                                                                                                                                                                                                                                                                                                                                                                                                                                                                                                                                                                                                                                                                                                                                                                                                                                                                                                                                                                                                                                                                                                           |          |          |         |          |   |          |          |          |   |          |         |          |   |          |          |         |   |          |          |         |   |         |          |          |   |         |         |         |   |          |         |          |   |         |         |         |   |         |          |          |   |          |          |         |   |          |          |         |   |          |          |         |   |          |         |          |   |          |         |          |   |          |         |         |   |          |         |          |   |         |         |         |   |         |         |         |   |         |          |          |   |         |          |          |   |         |          |          |   |         |          |          |   |         |         |          |   |         |         |         |   |         |         |         |   |         |         |         |
| Cartesian<br>Coordinates                       | <p>30<br/>         spD3-substrate-SerAsn-A.out Energy: -421049.2394633</p> <table> <tr><td>C</td><td>-3.61223</td><td>0.24751</td><td>-0.69166</td></tr> <tr><td>O</td><td>-4.37833</td><td>-0.67010</td><td>-0.95702</td></tr> <tr><td>N</td><td>-2.29614</td><td>0.05653</td><td>-0.39578</td></tr> <tr><td>O</td><td>-0.47532</td><td>-2.04843</td><td>0.65016</td></tr> <tr><td>H</td><td>-0.15733</td><td>-1.18231</td><td>0.97609</td></tr> <tr><td>C</td><td>3.46953</td><td>-0.35319</td><td>-0.94920</td></tr> <tr><td>C</td><td>1.64530</td><td>0.67100</td><td>0.39404</td></tr> <tr><td>H</td><td>-1.70995</td><td>0.80321</td><td>-0.05289</td></tr> <tr><td>O</td><td>0.57454</td><td>0.57019</td><td>0.98968</td></tr> <tr><td>C</td><td>2.29572</td><td>-0.44808</td><td>-0.30735</td></tr> <tr><td>C</td><td>-0.92019</td><td>-2.82080</td><td>1.75714</td></tr> <tr><td>H</td><td>-0.11371</td><td>-3.00861</td><td>2.48163</td></tr> <tr><td>H</td><td>-1.26064</td><td>-3.78251</td><td>1.36424</td></tr> <tr><td>C</td><td>-4.08146</td><td>1.70048</td><td>-0.68308</td></tr> <tr><td>H</td><td>-3.27132</td><td>2.42701</td><td>-0.56144</td></tr> <tr><td>H</td><td>-4.80227</td><td>1.83614</td><td>0.13038</td></tr> <tr><td>H</td><td>-4.60683</td><td>1.90488</td><td>-1.62030</td></tr> <tr><td>O</td><td>2.32101</td><td>1.83176</td><td>0.33496</td></tr> <tr><td>C</td><td>1.72094</td><td>2.94696</td><td>1.01467</td></tr> <tr><td>C</td><td>4.13485</td><td>-1.48250</td><td>-1.66951</td></tr> <tr><td>H</td><td>4.28679</td><td>-1.22862</td><td>-2.72707</td></tr> <tr><td>H</td><td>3.54957</td><td>-2.40490</td><td>-1.61432</td></tr> <tr><td>H</td><td>5.13178</td><td>-1.67446</td><td>-1.25064</td></tr> <tr><td>H</td><td>3.98538</td><td>0.60548</td><td>-0.95700</td></tr> <tr><td>H</td><td>2.42013</td><td>3.77347</td><td>0.88776</td></tr> <tr><td>H</td><td>0.75371</td><td>3.19264</td><td>0.56824</td></tr> <tr><td>H</td><td>1.57906</td><td>2.71995</td><td>2.07415</td></tr> </table> | C        | -3.61223 | 0.24751 | -0.69166 | O | -4.37833 | -0.67010 | -0.95702 | N | -2.29614 | 0.05653 | -0.39578 | O | -0.47532 | -2.04843 | 0.65016 | H | -0.15733 | -1.18231 | 0.97609 | C | 3.46953 | -0.35319 | -0.94920 | C | 1.64530 | 0.67100 | 0.39404 | H | -1.70995 | 0.80321 | -0.05289 | O | 0.57454 | 0.57019 | 0.98968 | C | 2.29572 | -0.44808 | -0.30735 | C | -0.92019 | -2.82080 | 1.75714 | H | -0.11371 | -3.00861 | 2.48163 | H | -1.26064 | -3.78251 | 1.36424 | C | -4.08146 | 1.70048 | -0.68308 | H | -3.27132 | 2.42701 | -0.56144 | H | -4.80227 | 1.83614 | 0.13038 | H | -4.60683 | 1.90488 | -1.62030 | O | 2.32101 | 1.83176 | 0.33496 | C | 1.72094 | 2.94696 | 1.01467 | C | 4.13485 | -1.48250 | -1.66951 | H | 4.28679 | -1.22862 | -2.72707 | H | 3.54957 | -2.40490 | -1.61432 | H | 5.13178 | -1.67446 | -1.25064 | H | 3.98538 | 0.60548 | -0.95700 | H | 2.42013 | 3.77347 | 0.88776 | H | 0.75371 | 3.19264 | 0.56824 | H | 1.57906 | 2.71995 | 2.07415 |
| C                                              | -3.61223                                                                                                                                                                                                                                                                                                                                                                                                                                                                                                                                                                                                                                                                                                                                                                                                                                                                                                                                                                                                                                                                                                                                                                                                                                                                                                                                                                                                                                                                                                                                                                                                                                                                                                                                                                                                                                                                                                                                                                                                                                       | 0.24751  | -0.69166 |         |          |   |          |          |          |   |          |         |          |   |          |          |         |   |          |          |         |   |         |          |          |   |         |         |         |   |          |         |          |   |         |         |         |   |         |          |          |   |          |          |         |   |          |          |         |   |          |          |         |   |          |         |          |   |          |         |          |   |          |         |         |   |          |         |          |   |         |         |         |   |         |         |         |   |         |          |          |   |         |          |          |   |         |          |          |   |         |          |          |   |         |         |          |   |         |         |         |   |         |         |         |   |         |         |         |
| O                                              | -4.37833                                                                                                                                                                                                                                                                                                                                                                                                                                                                                                                                                                                                                                                                                                                                                                                                                                                                                                                                                                                                                                                                                                                                                                                                                                                                                                                                                                                                                                                                                                                                                                                                                                                                                                                                                                                                                                                                                                                                                                                                                                       | -0.67010 | -0.95702 |         |          |   |          |          |          |   |          |         |          |   |          |          |         |   |          |          |         |   |         |          |          |   |         |         |         |   |          |         |          |   |         |         |         |   |         |          |          |   |          |          |         |   |          |          |         |   |          |          |         |   |          |         |          |   |          |         |          |   |          |         |         |   |          |         |          |   |         |         |         |   |         |         |         |   |         |          |          |   |         |          |          |   |         |          |          |   |         |          |          |   |         |         |          |   |         |         |         |   |         |         |         |   |         |         |         |
| N                                              | -2.29614                                                                                                                                                                                                                                                                                                                                                                                                                                                                                                                                                                                                                                                                                                                                                                                                                                                                                                                                                                                                                                                                                                                                                                                                                                                                                                                                                                                                                                                                                                                                                                                                                                                                                                                                                                                                                                                                                                                                                                                                                                       | 0.05653  | -0.39578 |         |          |   |          |          |          |   |          |         |          |   |          |          |         |   |          |          |         |   |         |          |          |   |         |         |         |   |          |         |          |   |         |         |         |   |         |          |          |   |          |          |         |   |          |          |         |   |          |          |         |   |          |         |          |   |          |         |          |   |          |         |         |   |          |         |          |   |         |         |         |   |         |         |         |   |         |          |          |   |         |          |          |   |         |          |          |   |         |          |          |   |         |         |          |   |         |         |         |   |         |         |         |   |         |         |         |
| O                                              | -0.47532                                                                                                                                                                                                                                                                                                                                                                                                                                                                                                                                                                                                                                                                                                                                                                                                                                                                                                                                                                                                                                                                                                                                                                                                                                                                                                                                                                                                                                                                                                                                                                                                                                                                                                                                                                                                                                                                                                                                                                                                                                       | -2.04843 | 0.65016  |         |          |   |          |          |          |   |          |         |          |   |          |          |         |   |          |          |         |   |         |          |          |   |         |         |         |   |          |         |          |   |         |         |         |   |         |          |          |   |          |          |         |   |          |          |         |   |          |          |         |   |          |         |          |   |          |         |          |   |          |         |         |   |          |         |          |   |         |         |         |   |         |         |         |   |         |          |          |   |         |          |          |   |         |          |          |   |         |          |          |   |         |         |          |   |         |         |         |   |         |         |         |   |         |         |         |
| H                                              | -0.15733                                                                                                                                                                                                                                                                                                                                                                                                                                                                                                                                                                                                                                                                                                                                                                                                                                                                                                                                                                                                                                                                                                                                                                                                                                                                                                                                                                                                                                                                                                                                                                                                                                                                                                                                                                                                                                                                                                                                                                                                                                       | -1.18231 | 0.97609  |         |          |   |          |          |          |   |          |         |          |   |          |          |         |   |          |          |         |   |         |          |          |   |         |         |         |   |          |         |          |   |         |         |         |   |         |          |          |   |          |          |         |   |          |          |         |   |          |          |         |   |          |         |          |   |          |         |          |   |          |         |         |   |          |         |          |   |         |         |         |   |         |         |         |   |         |          |          |   |         |          |          |   |         |          |          |   |         |          |          |   |         |         |          |   |         |         |         |   |         |         |         |   |         |         |         |
| C                                              | 3.46953                                                                                                                                                                                                                                                                                                                                                                                                                                                                                                                                                                                                                                                                                                                                                                                                                                                                                                                                                                                                                                                                                                                                                                                                                                                                                                                                                                                                                                                                                                                                                                                                                                                                                                                                                                                                                                                                                                                                                                                                                                        | -0.35319 | -0.94920 |         |          |   |          |          |          |   |          |         |          |   |          |          |         |   |          |          |         |   |         |          |          |   |         |         |         |   |          |         |          |   |         |         |         |   |         |          |          |   |          |          |         |   |          |          |         |   |          |          |         |   |          |         |          |   |          |         |          |   |          |         |         |   |          |         |          |   |         |         |         |   |         |         |         |   |         |          |          |   |         |          |          |   |         |          |          |   |         |          |          |   |         |         |          |   |         |         |         |   |         |         |         |   |         |         |         |
| C                                              | 1.64530                                                                                                                                                                                                                                                                                                                                                                                                                                                                                                                                                                                                                                                                                                                                                                                                                                                                                                                                                                                                                                                                                                                                                                                                                                                                                                                                                                                                                                                                                                                                                                                                                                                                                                                                                                                                                                                                                                                                                                                                                                        | 0.67100  | 0.39404  |         |          |   |          |          |          |   |          |         |          |   |          |          |         |   |          |          |         |   |         |          |          |   |         |         |         |   |          |         |          |   |         |         |         |   |         |          |          |   |          |          |         |   |          |          |         |   |          |          |         |   |          |         |          |   |          |         |          |   |          |         |         |   |          |         |          |   |         |         |         |   |         |         |         |   |         |          |          |   |         |          |          |   |         |          |          |   |         |          |          |   |         |         |          |   |         |         |         |   |         |         |         |   |         |         |         |
| H                                              | -1.70995                                                                                                                                                                                                                                                                                                                                                                                                                                                                                                                                                                                                                                                                                                                                                                                                                                                                                                                                                                                                                                                                                                                                                                                                                                                                                                                                                                                                                                                                                                                                                                                                                                                                                                                                                                                                                                                                                                                                                                                                                                       | 0.80321  | -0.05289 |         |          |   |          |          |          |   |          |         |          |   |          |          |         |   |          |          |         |   |         |          |          |   |         |         |         |   |          |         |          |   |         |         |         |   |         |          |          |   |          |          |         |   |          |          |         |   |          |          |         |   |          |         |          |   |          |         |          |   |          |         |         |   |          |         |          |   |         |         |         |   |         |         |         |   |         |          |          |   |         |          |          |   |         |          |          |   |         |          |          |   |         |         |          |   |         |         |         |   |         |         |         |   |         |         |         |
| O                                              | 0.57454                                                                                                                                                                                                                                                                                                                                                                                                                                                                                                                                                                                                                                                                                                                                                                                                                                                                                                                                                                                                                                                                                                                                                                                                                                                                                                                                                                                                                                                                                                                                                                                                                                                                                                                                                                                                                                                                                                                                                                                                                                        | 0.57019  | 0.98968  |         |          |   |          |          |          |   |          |         |          |   |          |          |         |   |          |          |         |   |         |          |          |   |         |         |         |   |          |         |          |   |         |         |         |   |         |          |          |   |          |          |         |   |          |          |         |   |          |          |         |   |          |         |          |   |          |         |          |   |          |         |         |   |          |         |          |   |         |         |         |   |         |         |         |   |         |          |          |   |         |          |          |   |         |          |          |   |         |          |          |   |         |         |          |   |         |         |         |   |         |         |         |   |         |         |         |
| C                                              | 2.29572                                                                                                                                                                                                                                                                                                                                                                                                                                                                                                                                                                                                                                                                                                                                                                                                                                                                                                                                                                                                                                                                                                                                                                                                                                                                                                                                                                                                                                                                                                                                                                                                                                                                                                                                                                                                                                                                                                                                                                                                                                        | -0.44808 | -0.30735 |         |          |   |          |          |          |   |          |         |          |   |          |          |         |   |          |          |         |   |         |          |          |   |         |         |         |   |          |         |          |   |         |         |         |   |         |          |          |   |          |          |         |   |          |          |         |   |          |          |         |   |          |         |          |   |          |         |          |   |          |         |         |   |          |         |          |   |         |         |         |   |         |         |         |   |         |          |          |   |         |          |          |   |         |          |          |   |         |          |          |   |         |         |          |   |         |         |         |   |         |         |         |   |         |         |         |
| C                                              | -0.92019                                                                                                                                                                                                                                                                                                                                                                                                                                                                                                                                                                                                                                                                                                                                                                                                                                                                                                                                                                                                                                                                                                                                                                                                                                                                                                                                                                                                                                                                                                                                                                                                                                                                                                                                                                                                                                                                                                                                                                                                                                       | -2.82080 | 1.75714  |         |          |   |          |          |          |   |          |         |          |   |          |          |         |   |          |          |         |   |         |          |          |   |         |         |         |   |          |         |          |   |         |         |         |   |         |          |          |   |          |          |         |   |          |          |         |   |          |          |         |   |          |         |          |   |          |         |          |   |          |         |         |   |          |         |          |   |         |         |         |   |         |         |         |   |         |          |          |   |         |          |          |   |         |          |          |   |         |          |          |   |         |         |          |   |         |         |         |   |         |         |         |   |         |         |         |
| H                                              | -0.11371                                                                                                                                                                                                                                                                                                                                                                                                                                                                                                                                                                                                                                                                                                                                                                                                                                                                                                                                                                                                                                                                                                                                                                                                                                                                                                                                                                                                                                                                                                                                                                                                                                                                                                                                                                                                                                                                                                                                                                                                                                       | -3.00861 | 2.48163  |         |          |   |          |          |          |   |          |         |          |   |          |          |         |   |          |          |         |   |         |          |          |   |         |         |         |   |          |         |          |   |         |         |         |   |         |          |          |   |          |          |         |   |          |          |         |   |          |          |         |   |          |         |          |   |          |         |          |   |          |         |         |   |          |         |          |   |         |         |         |   |         |         |         |   |         |          |          |   |         |          |          |   |         |          |          |   |         |          |          |   |         |         |          |   |         |         |         |   |         |         |         |   |         |         |         |
| H                                              | -1.26064                                                                                                                                                                                                                                                                                                                                                                                                                                                                                                                                                                                                                                                                                                                                                                                                                                                                                                                                                                                                                                                                                                                                                                                                                                                                                                                                                                                                                                                                                                                                                                                                                                                                                                                                                                                                                                                                                                                                                                                                                                       | -3.78251 | 1.36424  |         |          |   |          |          |          |   |          |         |          |   |          |          |         |   |          |          |         |   |         |          |          |   |         |         |         |   |          |         |          |   |         |         |         |   |         |          |          |   |          |          |         |   |          |          |         |   |          |          |         |   |          |         |          |   |          |         |          |   |          |         |         |   |          |         |          |   |         |         |         |   |         |         |         |   |         |          |          |   |         |          |          |   |         |          |          |   |         |          |          |   |         |         |          |   |         |         |         |   |         |         |         |   |         |         |         |
| C                                              | -4.08146                                                                                                                                                                                                                                                                                                                                                                                                                                                                                                                                                                                                                                                                                                                                                                                                                                                                                                                                                                                                                                                                                                                                                                                                                                                                                                                                                                                                                                                                                                                                                                                                                                                                                                                                                                                                                                                                                                                                                                                                                                       | 1.70048  | -0.68308 |         |          |   |          |          |          |   |          |         |          |   |          |          |         |   |          |          |         |   |         |          |          |   |         |         |         |   |          |         |          |   |         |         |         |   |         |          |          |   |          |          |         |   |          |          |         |   |          |          |         |   |          |         |          |   |          |         |          |   |          |         |         |   |          |         |          |   |         |         |         |   |         |         |         |   |         |          |          |   |         |          |          |   |         |          |          |   |         |          |          |   |         |         |          |   |         |         |         |   |         |         |         |   |         |         |         |
| H                                              | -3.27132                                                                                                                                                                                                                                                                                                                                                                                                                                                                                                                                                                                                                                                                                                                                                                                                                                                                                                                                                                                                                                                                                                                                                                                                                                                                                                                                                                                                                                                                                                                                                                                                                                                                                                                                                                                                                                                                                                                                                                                                                                       | 2.42701  | -0.56144 |         |          |   |          |          |          |   |          |         |          |   |          |          |         |   |          |          |         |   |         |          |          |   |         |         |         |   |          |         |          |   |         |         |         |   |         |          |          |   |          |          |         |   |          |          |         |   |          |          |         |   |          |         |          |   |          |         |          |   |          |         |         |   |          |         |          |   |         |         |         |   |         |         |         |   |         |          |          |   |         |          |          |   |         |          |          |   |         |          |          |   |         |         |          |   |         |         |         |   |         |         |         |   |         |         |         |
| H                                              | -4.80227                                                                                                                                                                                                                                                                                                                                                                                                                                                                                                                                                                                                                                                                                                                                                                                                                                                                                                                                                                                                                                                                                                                                                                                                                                                                                                                                                                                                                                                                                                                                                                                                                                                                                                                                                                                                                                                                                                                                                                                                                                       | 1.83614  | 0.13038  |         |          |   |          |          |          |   |          |         |          |   |          |          |         |   |          |          |         |   |         |          |          |   |         |         |         |   |          |         |          |   |         |         |         |   |         |          |          |   |          |          |         |   |          |          |         |   |          |          |         |   |          |         |          |   |          |         |          |   |          |         |         |   |          |         |          |   |         |         |         |   |         |         |         |   |         |          |          |   |         |          |          |   |         |          |          |   |         |          |          |   |         |         |          |   |         |         |         |   |         |         |         |   |         |         |         |
| H                                              | -4.60683                                                                                                                                                                                                                                                                                                                                                                                                                                                                                                                                                                                                                                                                                                                                                                                                                                                                                                                                                                                                                                                                                                                                                                                                                                                                                                                                                                                                                                                                                                                                                                                                                                                                                                                                                                                                                                                                                                                                                                                                                                       | 1.90488  | -1.62030 |         |          |   |          |          |          |   |          |         |          |   |          |          |         |   |          |          |         |   |         |          |          |   |         |         |         |   |          |         |          |   |         |         |         |   |         |          |          |   |          |          |         |   |          |          |         |   |          |          |         |   |          |         |          |   |          |         |          |   |          |         |         |   |          |         |          |   |         |         |         |   |         |         |         |   |         |          |          |   |         |          |          |   |         |          |          |   |         |          |          |   |         |         |          |   |         |         |         |   |         |         |         |   |         |         |         |
| O                                              | 2.32101                                                                                                                                                                                                                                                                                                                                                                                                                                                                                                                                                                                                                                                                                                                                                                                                                                                                                                                                                                                                                                                                                                                                                                                                                                                                                                                                                                                                                                                                                                                                                                                                                                                                                                                                                                                                                                                                                                                                                                                                                                        | 1.83176  | 0.33496  |         |          |   |          |          |          |   |          |         |          |   |          |          |         |   |          |          |         |   |         |          |          |   |         |         |         |   |          |         |          |   |         |         |         |   |         |          |          |   |          |          |         |   |          |          |         |   |          |          |         |   |          |         |          |   |          |         |          |   |          |         |         |   |          |         |          |   |         |         |         |   |         |         |         |   |         |          |          |   |         |          |          |   |         |          |          |   |         |          |          |   |         |         |          |   |         |         |         |   |         |         |         |   |         |         |         |
| C                                              | 1.72094                                                                                                                                                                                                                                                                                                                                                                                                                                                                                                                                                                                                                                                                                                                                                                                                                                                                                                                                                                                                                                                                                                                                                                                                                                                                                                                                                                                                                                                                                                                                                                                                                                                                                                                                                                                                                                                                                                                                                                                                                                        | 2.94696  | 1.01467  |         |          |   |          |          |          |   |          |         |          |   |          |          |         |   |          |          |         |   |         |          |          |   |         |         |         |   |          |         |          |   |         |         |         |   |         |          |          |   |          |          |         |   |          |          |         |   |          |          |         |   |          |         |          |   |          |         |          |   |          |         |         |   |          |         |          |   |         |         |         |   |         |         |         |   |         |          |          |   |         |          |          |   |         |          |          |   |         |          |          |   |         |         |          |   |         |         |         |   |         |         |         |   |         |         |         |
| C                                              | 4.13485                                                                                                                                                                                                                                                                                                                                                                                                                                                                                                                                                                                                                                                                                                                                                                                                                                                                                                                                                                                                                                                                                                                                                                                                                                                                                                                                                                                                                                                                                                                                                                                                                                                                                                                                                                                                                                                                                                                                                                                                                                        | -1.48250 | -1.66951 |         |          |   |          |          |          |   |          |         |          |   |          |          |         |   |          |          |         |   |         |          |          |   |         |         |         |   |          |         |          |   |         |         |         |   |         |          |          |   |          |          |         |   |          |          |         |   |          |          |         |   |          |         |          |   |          |         |          |   |          |         |         |   |          |         |          |   |         |         |         |   |         |         |         |   |         |          |          |   |         |          |          |   |         |          |          |   |         |          |          |   |         |         |          |   |         |         |         |   |         |         |         |   |         |         |         |
| H                                              | 4.28679                                                                                                                                                                                                                                                                                                                                                                                                                                                                                                                                                                                                                                                                                                                                                                                                                                                                                                                                                                                                                                                                                                                                                                                                                                                                                                                                                                                                                                                                                                                                                                                                                                                                                                                                                                                                                                                                                                                                                                                                                                        | -1.22862 | -2.72707 |         |          |   |          |          |          |   |          |         |          |   |          |          |         |   |          |          |         |   |         |          |          |   |         |         |         |   |          |         |          |   |         |         |         |   |         |          |          |   |          |          |         |   |          |          |         |   |          |          |         |   |          |         |          |   |          |         |          |   |          |         |         |   |          |         |          |   |         |         |         |   |         |         |         |   |         |          |          |   |         |          |          |   |         |          |          |   |         |          |          |   |         |         |          |   |         |         |         |   |         |         |         |   |         |         |         |
| H                                              | 3.54957                                                                                                                                                                                                                                                                                                                                                                                                                                                                                                                                                                                                                                                                                                                                                                                                                                                                                                                                                                                                                                                                                                                                                                                                                                                                                                                                                                                                                                                                                                                                                                                                                                                                                                                                                                                                                                                                                                                                                                                                                                        | -2.40490 | -1.61432 |         |          |   |          |          |          |   |          |         |          |   |          |          |         |   |          |          |         |   |         |          |          |   |         |         |         |   |          |         |          |   |         |         |         |   |         |          |          |   |          |          |         |   |          |          |         |   |          |          |         |   |          |         |          |   |          |         |          |   |          |         |         |   |          |         |          |   |         |         |         |   |         |         |         |   |         |          |          |   |         |          |          |   |         |          |          |   |         |          |          |   |         |         |          |   |         |         |         |   |         |         |         |   |         |         |         |
| H                                              | 5.13178                                                                                                                                                                                                                                                                                                                                                                                                                                                                                                                                                                                                                                                                                                                                                                                                                                                                                                                                                                                                                                                                                                                                                                                                                                                                                                                                                                                                                                                                                                                                                                                                                                                                                                                                                                                                                                                                                                                                                                                                                                        | -1.67446 | -1.25064 |         |          |   |          |          |          |   |          |         |          |   |          |          |         |   |          |          |         |   |         |          |          |   |         |         |         |   |          |         |          |   |         |         |         |   |         |          |          |   |          |          |         |   |          |          |         |   |          |          |         |   |          |         |          |   |          |         |          |   |          |         |         |   |          |         |          |   |         |         |         |   |         |         |         |   |         |          |          |   |         |          |          |   |         |          |          |   |         |          |          |   |         |         |          |   |         |         |         |   |         |         |         |   |         |         |         |
| H                                              | 3.98538                                                                                                                                                                                                                                                                                                                                                                                                                                                                                                                                                                                                                                                                                                                                                                                                                                                                                                                                                                                                                                                                                                                                                                                                                                                                                                                                                                                                                                                                                                                                                                                                                                                                                                                                                                                                                                                                                                                                                                                                                                        | 0.60548  | -0.95700 |         |          |   |          |          |          |   |          |         |          |   |          |          |         |   |          |          |         |   |         |          |          |   |         |         |         |   |          |         |          |   |         |         |         |   |         |          |          |   |          |          |         |   |          |          |         |   |          |          |         |   |          |         |          |   |          |         |          |   |          |         |         |   |          |         |          |   |         |         |         |   |         |         |         |   |         |          |          |   |         |          |          |   |         |          |          |   |         |          |          |   |         |         |          |   |         |         |         |   |         |         |         |   |         |         |         |
| H                                              | 2.42013                                                                                                                                                                                                                                                                                                                                                                                                                                                                                                                                                                                                                                                                                                                                                                                                                                                                                                                                                                                                                                                                                                                                                                                                                                                                                                                                                                                                                                                                                                                                                                                                                                                                                                                                                                                                                                                                                                                                                                                                                                        | 3.77347  | 0.88776  |         |          |   |          |          |          |   |          |         |          |   |          |          |         |   |          |          |         |   |         |          |          |   |         |         |         |   |          |         |          |   |         |         |         |   |         |          |          |   |          |          |         |   |          |          |         |   |          |          |         |   |          |         |          |   |          |         |          |   |          |         |         |   |          |         |          |   |         |         |         |   |         |         |         |   |         |          |          |   |         |          |          |   |         |          |          |   |         |          |          |   |         |         |          |   |         |         |         |   |         |         |         |   |         |         |         |
| H                                              | 0.75371                                                                                                                                                                                                                                                                                                                                                                                                                                                                                                                                                                                                                                                                                                                                                                                                                                                                                                                                                                                                                                                                                                                                                                                                                                                                                                                                                                                                                                                                                                                                                                                                                                                                                                                                                                                                                                                                                                                                                                                                                                        | 3.19264  | 0.56824  |         |          |   |          |          |          |   |          |         |          |   |          |          |         |   |          |          |         |   |         |          |          |   |         |         |         |   |          |         |          |   |         |         |         |   |         |          |          |   |          |          |         |   |          |          |         |   |          |          |         |   |          |         |          |   |          |         |          |   |          |         |         |   |          |         |          |   |         |         |         |   |         |         |         |   |         |          |          |   |         |          |          |   |         |          |          |   |         |          |          |   |         |         |          |   |         |         |         |   |         |         |         |   |         |         |         |
| H                                              | 1.57906                                                                                                                                                                                                                                                                                                                                                                                                                                                                                                                                                                                                                                                                                                                                                                                                                                                                                                                                                                                                                                                                                                                                                                                                                                                                                                                                                                                                                                                                                                                                                                                                                                                                                                                                                                                                                                                                                                                                                                                                                                        | 2.71995  | 2.07415  |         |          |   |          |          |          |   |          |         |          |   |          |          |         |   |          |          |         |   |         |          |          |   |         |         |         |   |          |         |          |   |         |         |         |   |         |          |          |   |          |          |         |   |          |          |         |   |          |          |         |   |          |         |          |   |          |         |          |   |          |         |         |   |          |         |          |   |         |         |         |   |         |         |         |   |         |          |          |   |         |          |          |   |         |          |          |   |         |          |          |   |         |         |          |   |         |         |         |   |         |         |         |   |         |         |         |

|   |          |          |          |
|---|----------|----------|----------|
| H | -1.93537 | -0.88707 | -0.27405 |
| H | -1.76142 | -2.34683 | 2.28310  |
| H | 1.73536  | -1.37884 | -0.27002 |

Optimized Molecular Properties for **Methyl Acrylate•Arg** Complex

|                                                |                                                                                                                                                                                                                                                                                                                                                                                                                                                                                                                                                                                                                                                                                                                                                                                                                                                                                                                                                                                                                                                                                                                                                                                                                                                                                                                                                                                                                                                                                                                                                                                                                                                                                                                                                                                                                                                                                                                                                                                   |          |          |         |         |   |          |         |         |   |          |         |          |   |          |         |         |   |         |         |          |   |          |          |          |   |          |         |          |   |         |         |          |   |          |          |         |   |         |         |          |   |         |         |          |   |          |          |          |   |          |          |          |   |          |          |         |   |          |          |         |   |         |         |          |   |         |         |          |   |          |          |         |   |         |          |         |   |         |          |          |   |         |          |         |   |         |         |         |   |         |          |         |   |         |          |         |   |         |          |          |   |         |          |         |
|------------------------------------------------|-----------------------------------------------------------------------------------------------------------------------------------------------------------------------------------------------------------------------------------------------------------------------------------------------------------------------------------------------------------------------------------------------------------------------------------------------------------------------------------------------------------------------------------------------------------------------------------------------------------------------------------------------------------------------------------------------------------------------------------------------------------------------------------------------------------------------------------------------------------------------------------------------------------------------------------------------------------------------------------------------------------------------------------------------------------------------------------------------------------------------------------------------------------------------------------------------------------------------------------------------------------------------------------------------------------------------------------------------------------------------------------------------------------------------------------------------------------------------------------------------------------------------------------------------------------------------------------------------------------------------------------------------------------------------------------------------------------------------------------------------------------------------------------------------------------------------------------------------------------------------------------------------------------------------------------------------------------------------------------|----------|----------|---------|---------|---|----------|---------|---------|---|----------|---------|----------|---|----------|---------|---------|---|---------|---------|----------|---|----------|----------|----------|---|----------|---------|----------|---|---------|---------|----------|---|----------|----------|---------|---|---------|---------|----------|---|---------|---------|----------|---|----------|----------|----------|---|----------|----------|----------|---|----------|----------|---------|---|----------|----------|---------|---|---------|---------|----------|---|---------|---------|----------|---|----------|----------|---------|---|---------|----------|---------|---|---------|----------|----------|---|---------|----------|---------|---|---------|---------|---------|---|---------|----------|---------|---|---------|----------|---------|---|---------|----------|----------|---|---------|----------|---------|
| Number of<br>(-)<br>Vibrational<br>Frequencies | 0                                                                                                                                                                                                                                                                                                                                                                                                                                                                                                                                                                                                                                                                                                                                                                                                                                                                                                                                                                                                                                                                                                                                                                                                                                                                                                                                                                                                                                                                                                                                                                                                                                                                                                                                                                                                                                                                                                                                                                                 |          |          |         |         |   |          |         |         |   |          |         |          |   |          |         |         |   |         |         |          |   |          |          |          |   |          |         |          |   |         |         |          |   |          |          |         |   |         |         |          |   |         |         |          |   |          |          |          |   |          |          |          |   |          |          |         |   |          |          |         |   |         |         |          |   |         |         |          |   |          |          |         |   |         |          |         |   |         |          |          |   |         |          |         |   |         |         |         |   |         |          |         |   |         |          |         |   |         |          |          |   |         |          |         |
| Absolute<br>Energies<br>(Hartrees)             | <p><b>B3LYP/6-31G(d) (PCM)</b></p> <p>There are 5 positive frequencies below 100 cm<sup>-1</sup>.</p> <p>Zero-point correction: 0.243390 hartree<br/>         Enthalpy correction: 0.260669 hartree<br/>         Free Energy correction: 0.201000 hartree<br/>         Quasiharmonic Free Energy correction: 0.204145 hartree</p> <p>SCF Energy: -590.953635 hartree<br/>         SCF Energy + ZPVE: -590.710245 hartree<br/>         Enthalpy: -590.692966 hartree<br/>         Free Energy: -590.752635 hartree</p> <p>Free Energy with quasiharmonic correction: -590.749491 hartree<br/>         (correction: 1.97 kcal/mol)</p> <p><b>B3LYP-D3/6-311+G(d,p) (PCM)</b></p> <p>SCF Done: E(RB3LYP) = -591.158454188 A.U.</p>                                                                                                                                                                                                                                                                                                                                                                                                                                                                                                                                                                                                                                                                                                                                                                                                                                                                                                                                                                                                                                                                                                                                                                                                                                                   |          |          |         |         |   |          |         |         |   |          |         |          |   |          |         |         |   |         |         |          |   |          |          |          |   |          |         |          |   |         |         |          |   |          |          |         |   |         |         |          |   |         |         |          |   |          |          |          |   |          |          |          |   |          |          |         |   |          |          |         |   |         |         |          |   |         |         |          |   |          |          |         |   |         |          |         |   |         |          |          |   |         |          |         |   |         |         |         |   |         |          |         |   |         |          |         |   |         |          |          |   |         |          |         |
| Cartesian<br>Coordinates                       | <p>(PCM)</p> <p>28</p> <p>spD3-MA.out Energy: -370957.5276824</p> <table> <tbody> <tr><td>H</td><td>1.07848</td><td>2.85773</td><td>0.86625</td></tr> <tr><td>N</td><td>-2.29196</td><td>1.27605</td><td>0.04859</td></tr> <tr><td>H</td><td>-4.73253</td><td>0.75852</td><td>-0.03923</td></tr> <tr><td>H</td><td>-1.27572</td><td>1.34233</td><td>0.04834</td></tr> <tr><td>H</td><td>1.07345</td><td>2.82248</td><td>-0.92331</td></tr> <tr><td>H</td><td>-4.76810</td><td>-1.91216</td><td>-0.89079</td></tr> <tr><td>C</td><td>-2.84544</td><td>0.05464</td><td>-0.01396</td></tr> <tr><td>C</td><td>1.69681</td><td>2.75274</td><td>-0.02875</td></tr> <tr><td>N</td><td>-4.17631</td><td>-0.08338</td><td>0.02066</td></tr> <tr><td>H</td><td>2.47196</td><td>3.51753</td><td>-0.04469</td></tr> <tr><td>O</td><td>0.43866</td><td>0.39504</td><td>-0.04402</td></tr> <tr><td>N</td><td>-2.04671</td><td>-1.01348</td><td>-0.10688</td></tr> <tr><td>H</td><td>-1.03770</td><td>-0.86047</td><td>-0.11787</td></tr> <tr><td>C</td><td>-4.87279</td><td>-1.36677</td><td>0.05418</td></tr> <tr><td>H</td><td>-5.93126</td><td>-1.16960</td><td>0.22125</td></tr> <tr><td>O</td><td>2.40392</td><td>1.49733</td><td>-0.00502</td></tr> <tr><td>C</td><td>1.67301</td><td>0.38034</td><td>-0.01797</td></tr> <tr><td>H</td><td>-4.50074</td><td>-1.98336</td><td>0.87786</td></tr> <tr><td>C</td><td>2.45319</td><td>-0.86260</td><td>0.00146</td></tr> <tr><td>H</td><td>1.85403</td><td>-1.76870</td><td>-0.00560</td></tr> <tr><td>C</td><td>3.79488</td><td>-0.91069</td><td>0.02846</td></tr> <tr><td>H</td><td>4.34965</td><td>0.02570</td><td>0.03474</td></tr> <tr><td>C</td><td>4.60216</td><td>-2.16681</td><td>0.05136</td></tr> <tr><td>H</td><td>3.97566</td><td>-3.06330</td><td>0.04629</td></tr> <tr><td>H</td><td>5.27583</td><td>-2.20203</td><td>-0.81479</td></tr> <tr><td>H</td><td>5.24431</td><td>-2.19006</td><td>0.94150</td></tr> </tbody> </table> | H        | 1.07848  | 2.85773 | 0.86625 | N | -2.29196 | 1.27605 | 0.04859 | H | -4.73253 | 0.75852 | -0.03923 | H | -1.27572 | 1.34233 | 0.04834 | H | 1.07345 | 2.82248 | -0.92331 | H | -4.76810 | -1.91216 | -0.89079 | C | -2.84544 | 0.05464 | -0.01396 | C | 1.69681 | 2.75274 | -0.02875 | N | -4.17631 | -0.08338 | 0.02066 | H | 2.47196 | 3.51753 | -0.04469 | O | 0.43866 | 0.39504 | -0.04402 | N | -2.04671 | -1.01348 | -0.10688 | H | -1.03770 | -0.86047 | -0.11787 | C | -4.87279 | -1.36677 | 0.05418 | H | -5.93126 | -1.16960 | 0.22125 | O | 2.40392 | 1.49733 | -0.00502 | C | 1.67301 | 0.38034 | -0.01797 | H | -4.50074 | -1.98336 | 0.87786 | C | 2.45319 | -0.86260 | 0.00146 | H | 1.85403 | -1.76870 | -0.00560 | C | 3.79488 | -0.91069 | 0.02846 | H | 4.34965 | 0.02570 | 0.03474 | C | 4.60216 | -2.16681 | 0.05136 | H | 3.97566 | -3.06330 | 0.04629 | H | 5.27583 | -2.20203 | -0.81479 | H | 5.24431 | -2.19006 | 0.94150 |
| H                                              | 1.07848                                                                                                                                                                                                                                                                                                                                                                                                                                                                                                                                                                                                                                                                                                                                                                                                                                                                                                                                                                                                                                                                                                                                                                                                                                                                                                                                                                                                                                                                                                                                                                                                                                                                                                                                                                                                                                                                                                                                                                           | 2.85773  | 0.86625  |         |         |   |          |         |         |   |          |         |          |   |          |         |         |   |         |         |          |   |          |          |          |   |          |         |          |   |         |         |          |   |          |          |         |   |         |         |          |   |         |         |          |   |          |          |          |   |          |          |          |   |          |          |         |   |          |          |         |   |         |         |          |   |         |         |          |   |          |          |         |   |         |          |         |   |         |          |          |   |         |          |         |   |         |         |         |   |         |          |         |   |         |          |         |   |         |          |          |   |         |          |         |
| N                                              | -2.29196                                                                                                                                                                                                                                                                                                                                                                                                                                                                                                                                                                                                                                                                                                                                                                                                                                                                                                                                                                                                                                                                                                                                                                                                                                                                                                                                                                                                                                                                                                                                                                                                                                                                                                                                                                                                                                                                                                                                                                          | 1.27605  | 0.04859  |         |         |   |          |         |         |   |          |         |          |   |          |         |         |   |         |         |          |   |          |          |          |   |          |         |          |   |         |         |          |   |          |          |         |   |         |         |          |   |         |         |          |   |          |          |          |   |          |          |          |   |          |          |         |   |          |          |         |   |         |         |          |   |         |         |          |   |          |          |         |   |         |          |         |   |         |          |          |   |         |          |         |   |         |         |         |   |         |          |         |   |         |          |         |   |         |          |          |   |         |          |         |
| H                                              | -4.73253                                                                                                                                                                                                                                                                                                                                                                                                                                                                                                                                                                                                                                                                                                                                                                                                                                                                                                                                                                                                                                                                                                                                                                                                                                                                                                                                                                                                                                                                                                                                                                                                                                                                                                                                                                                                                                                                                                                                                                          | 0.75852  | -0.03923 |         |         |   |          |         |         |   |          |         |          |   |          |         |         |   |         |         |          |   |          |          |          |   |          |         |          |   |         |         |          |   |          |          |         |   |         |         |          |   |         |         |          |   |          |          |          |   |          |          |          |   |          |          |         |   |          |          |         |   |         |         |          |   |         |         |          |   |          |          |         |   |         |          |         |   |         |          |          |   |         |          |         |   |         |         |         |   |         |          |         |   |         |          |         |   |         |          |          |   |         |          |         |
| H                                              | -1.27572                                                                                                                                                                                                                                                                                                                                                                                                                                                                                                                                                                                                                                                                                                                                                                                                                                                                                                                                                                                                                                                                                                                                                                                                                                                                                                                                                                                                                                                                                                                                                                                                                                                                                                                                                                                                                                                                                                                                                                          | 1.34233  | 0.04834  |         |         |   |          |         |         |   |          |         |          |   |          |         |         |   |         |         |          |   |          |          |          |   |          |         |          |   |         |         |          |   |          |          |         |   |         |         |          |   |         |         |          |   |          |          |          |   |          |          |          |   |          |          |         |   |          |          |         |   |         |         |          |   |         |         |          |   |          |          |         |   |         |          |         |   |         |          |          |   |         |          |         |   |         |         |         |   |         |          |         |   |         |          |         |   |         |          |          |   |         |          |         |
| H                                              | 1.07345                                                                                                                                                                                                                                                                                                                                                                                                                                                                                                                                                                                                                                                                                                                                                                                                                                                                                                                                                                                                                                                                                                                                                                                                                                                                                                                                                                                                                                                                                                                                                                                                                                                                                                                                                                                                                                                                                                                                                                           | 2.82248  | -0.92331 |         |         |   |          |         |         |   |          |         |          |   |          |         |         |   |         |         |          |   |          |          |          |   |          |         |          |   |         |         |          |   |          |          |         |   |         |         |          |   |         |         |          |   |          |          |          |   |          |          |          |   |          |          |         |   |          |          |         |   |         |         |          |   |         |         |          |   |          |          |         |   |         |          |         |   |         |          |          |   |         |          |         |   |         |         |         |   |         |          |         |   |         |          |         |   |         |          |          |   |         |          |         |
| H                                              | -4.76810                                                                                                                                                                                                                                                                                                                                                                                                                                                                                                                                                                                                                                                                                                                                                                                                                                                                                                                                                                                                                                                                                                                                                                                                                                                                                                                                                                                                                                                                                                                                                                                                                                                                                                                                                                                                                                                                                                                                                                          | -1.91216 | -0.89079 |         |         |   |          |         |         |   |          |         |          |   |          |         |         |   |         |         |          |   |          |          |          |   |          |         |          |   |         |         |          |   |          |          |         |   |         |         |          |   |         |         |          |   |          |          |          |   |          |          |          |   |          |          |         |   |          |          |         |   |         |         |          |   |         |         |          |   |          |          |         |   |         |          |         |   |         |          |          |   |         |          |         |   |         |         |         |   |         |          |         |   |         |          |         |   |         |          |          |   |         |          |         |
| C                                              | -2.84544                                                                                                                                                                                                                                                                                                                                                                                                                                                                                                                                                                                                                                                                                                                                                                                                                                                                                                                                                                                                                                                                                                                                                                                                                                                                                                                                                                                                                                                                                                                                                                                                                                                                                                                                                                                                                                                                                                                                                                          | 0.05464  | -0.01396 |         |         |   |          |         |         |   |          |         |          |   |          |         |         |   |         |         |          |   |          |          |          |   |          |         |          |   |         |         |          |   |          |          |         |   |         |         |          |   |         |         |          |   |          |          |          |   |          |          |          |   |          |          |         |   |          |          |         |   |         |         |          |   |         |         |          |   |          |          |         |   |         |          |         |   |         |          |          |   |         |          |         |   |         |         |         |   |         |          |         |   |         |          |         |   |         |          |          |   |         |          |         |
| C                                              | 1.69681                                                                                                                                                                                                                                                                                                                                                                                                                                                                                                                                                                                                                                                                                                                                                                                                                                                                                                                                                                                                                                                                                                                                                                                                                                                                                                                                                                                                                                                                                                                                                                                                                                                                                                                                                                                                                                                                                                                                                                           | 2.75274  | -0.02875 |         |         |   |          |         |         |   |          |         |          |   |          |         |         |   |         |         |          |   |          |          |          |   |          |         |          |   |         |         |          |   |          |          |         |   |         |         |          |   |         |         |          |   |          |          |          |   |          |          |          |   |          |          |         |   |          |          |         |   |         |         |          |   |         |         |          |   |          |          |         |   |         |          |         |   |         |          |          |   |         |          |         |   |         |         |         |   |         |          |         |   |         |          |         |   |         |          |          |   |         |          |         |
| N                                              | -4.17631                                                                                                                                                                                                                                                                                                                                                                                                                                                                                                                                                                                                                                                                                                                                                                                                                                                                                                                                                                                                                                                                                                                                                                                                                                                                                                                                                                                                                                                                                                                                                                                                                                                                                                                                                                                                                                                                                                                                                                          | -0.08338 | 0.02066  |         |         |   |          |         |         |   |          |         |          |   |          |         |         |   |         |         |          |   |          |          |          |   |          |         |          |   |         |         |          |   |          |          |         |   |         |         |          |   |         |         |          |   |          |          |          |   |          |          |          |   |          |          |         |   |          |          |         |   |         |         |          |   |         |         |          |   |          |          |         |   |         |          |         |   |         |          |          |   |         |          |         |   |         |         |         |   |         |          |         |   |         |          |         |   |         |          |          |   |         |          |         |
| H                                              | 2.47196                                                                                                                                                                                                                                                                                                                                                                                                                                                                                                                                                                                                                                                                                                                                                                                                                                                                                                                                                                                                                                                                                                                                                                                                                                                                                                                                                                                                                                                                                                                                                                                                                                                                                                                                                                                                                                                                                                                                                                           | 3.51753  | -0.04469 |         |         |   |          |         |         |   |          |         |          |   |          |         |         |   |         |         |          |   |          |          |          |   |          |         |          |   |         |         |          |   |          |          |         |   |         |         |          |   |         |         |          |   |          |          |          |   |          |          |          |   |          |          |         |   |          |          |         |   |         |         |          |   |         |         |          |   |          |          |         |   |         |          |         |   |         |          |          |   |         |          |         |   |         |         |         |   |         |          |         |   |         |          |         |   |         |          |          |   |         |          |         |
| O                                              | 0.43866                                                                                                                                                                                                                                                                                                                                                                                                                                                                                                                                                                                                                                                                                                                                                                                                                                                                                                                                                                                                                                                                                                                                                                                                                                                                                                                                                                                                                                                                                                                                                                                                                                                                                                                                                                                                                                                                                                                                                                           | 0.39504  | -0.04402 |         |         |   |          |         |         |   |          |         |          |   |          |         |         |   |         |         |          |   |          |          |          |   |          |         |          |   |         |         |          |   |          |          |         |   |         |         |          |   |         |         |          |   |          |          |          |   |          |          |          |   |          |          |         |   |          |          |         |   |         |         |          |   |         |         |          |   |          |          |         |   |         |          |         |   |         |          |          |   |         |          |         |   |         |         |         |   |         |          |         |   |         |          |         |   |         |          |          |   |         |          |         |
| N                                              | -2.04671                                                                                                                                                                                                                                                                                                                                                                                                                                                                                                                                                                                                                                                                                                                                                                                                                                                                                                                                                                                                                                                                                                                                                                                                                                                                                                                                                                                                                                                                                                                                                                                                                                                                                                                                                                                                                                                                                                                                                                          | -1.01348 | -0.10688 |         |         |   |          |         |         |   |          |         |          |   |          |         |         |   |         |         |          |   |          |          |          |   |          |         |          |   |         |         |          |   |          |          |         |   |         |         |          |   |         |         |          |   |          |          |          |   |          |          |          |   |          |          |         |   |          |          |         |   |         |         |          |   |         |         |          |   |          |          |         |   |         |          |         |   |         |          |          |   |         |          |         |   |         |         |         |   |         |          |         |   |         |          |         |   |         |          |          |   |         |          |         |
| H                                              | -1.03770                                                                                                                                                                                                                                                                                                                                                                                                                                                                                                                                                                                                                                                                                                                                                                                                                                                                                                                                                                                                                                                                                                                                                                                                                                                                                                                                                                                                                                                                                                                                                                                                                                                                                                                                                                                                                                                                                                                                                                          | -0.86047 | -0.11787 |         |         |   |          |         |         |   |          |         |          |   |          |         |         |   |         |         |          |   |          |          |          |   |          |         |          |   |         |         |          |   |          |          |         |   |         |         |          |   |         |         |          |   |          |          |          |   |          |          |          |   |          |          |         |   |          |          |         |   |         |         |          |   |         |         |          |   |          |          |         |   |         |          |         |   |         |          |          |   |         |          |         |   |         |         |         |   |         |          |         |   |         |          |         |   |         |          |          |   |         |          |         |
| C                                              | -4.87279                                                                                                                                                                                                                                                                                                                                                                                                                                                                                                                                                                                                                                                                                                                                                                                                                                                                                                                                                                                                                                                                                                                                                                                                                                                                                                                                                                                                                                                                                                                                                                                                                                                                                                                                                                                                                                                                                                                                                                          | -1.36677 | 0.05418  |         |         |   |          |         |         |   |          |         |          |   |          |         |         |   |         |         |          |   |          |          |          |   |          |         |          |   |         |         |          |   |          |          |         |   |         |         |          |   |         |         |          |   |          |          |          |   |          |          |          |   |          |          |         |   |          |          |         |   |         |         |          |   |         |         |          |   |          |          |         |   |         |          |         |   |         |          |          |   |         |          |         |   |         |         |         |   |         |          |         |   |         |          |         |   |         |          |          |   |         |          |         |
| H                                              | -5.93126                                                                                                                                                                                                                                                                                                                                                                                                                                                                                                                                                                                                                                                                                                                                                                                                                                                                                                                                                                                                                                                                                                                                                                                                                                                                                                                                                                                                                                                                                                                                                                                                                                                                                                                                                                                                                                                                                                                                                                          | -1.16960 | 0.22125  |         |         |   |          |         |         |   |          |         |          |   |          |         |         |   |         |         |          |   |          |          |          |   |          |         |          |   |         |         |          |   |          |          |         |   |         |         |          |   |         |         |          |   |          |          |          |   |          |          |          |   |          |          |         |   |          |          |         |   |         |         |          |   |         |         |          |   |          |          |         |   |         |          |         |   |         |          |          |   |         |          |         |   |         |         |         |   |         |          |         |   |         |          |         |   |         |          |          |   |         |          |         |
| O                                              | 2.40392                                                                                                                                                                                                                                                                                                                                                                                                                                                                                                                                                                                                                                                                                                                                                                                                                                                                                                                                                                                                                                                                                                                                                                                                                                                                                                                                                                                                                                                                                                                                                                                                                                                                                                                                                                                                                                                                                                                                                                           | 1.49733  | -0.00502 |         |         |   |          |         |         |   |          |         |          |   |          |         |         |   |         |         |          |   |          |          |          |   |          |         |          |   |         |         |          |   |          |          |         |   |         |         |          |   |         |         |          |   |          |          |          |   |          |          |          |   |          |          |         |   |          |          |         |   |         |         |          |   |         |         |          |   |          |          |         |   |         |          |         |   |         |          |          |   |         |          |         |   |         |         |         |   |         |          |         |   |         |          |         |   |         |          |          |   |         |          |         |
| C                                              | 1.67301                                                                                                                                                                                                                                                                                                                                                                                                                                                                                                                                                                                                                                                                                                                                                                                                                                                                                                                                                                                                                                                                                                                                                                                                                                                                                                                                                                                                                                                                                                                                                                                                                                                                                                                                                                                                                                                                                                                                                                           | 0.38034  | -0.01797 |         |         |   |          |         |         |   |          |         |          |   |          |         |         |   |         |         |          |   |          |          |          |   |          |         |          |   |         |         |          |   |          |          |         |   |         |         |          |   |         |         |          |   |          |          |          |   |          |          |          |   |          |          |         |   |          |          |         |   |         |         |          |   |         |         |          |   |          |          |         |   |         |          |         |   |         |          |          |   |         |          |         |   |         |         |         |   |         |          |         |   |         |          |         |   |         |          |          |   |         |          |         |
| H                                              | -4.50074                                                                                                                                                                                                                                                                                                                                                                                                                                                                                                                                                                                                                                                                                                                                                                                                                                                                                                                                                                                                                                                                                                                                                                                                                                                                                                                                                                                                                                                                                                                                                                                                                                                                                                                                                                                                                                                                                                                                                                          | -1.98336 | 0.87786  |         |         |   |          |         |         |   |          |         |          |   |          |         |         |   |         |         |          |   |          |          |          |   |          |         |          |   |         |         |          |   |          |          |         |   |         |         |          |   |         |         |          |   |          |          |          |   |          |          |          |   |          |          |         |   |          |          |         |   |         |         |          |   |         |         |          |   |          |          |         |   |         |          |         |   |         |          |          |   |         |          |         |   |         |         |         |   |         |          |         |   |         |          |         |   |         |          |          |   |         |          |         |
| C                                              | 2.45319                                                                                                                                                                                                                                                                                                                                                                                                                                                                                                                                                                                                                                                                                                                                                                                                                                                                                                                                                                                                                                                                                                                                                                                                                                                                                                                                                                                                                                                                                                                                                                                                                                                                                                                                                                                                                                                                                                                                                                           | -0.86260 | 0.00146  |         |         |   |          |         |         |   |          |         |          |   |          |         |         |   |         |         |          |   |          |          |          |   |          |         |          |   |         |         |          |   |          |          |         |   |         |         |          |   |         |         |          |   |          |          |          |   |          |          |          |   |          |          |         |   |          |          |         |   |         |         |          |   |         |         |          |   |          |          |         |   |         |          |         |   |         |          |          |   |         |          |         |   |         |         |         |   |         |          |         |   |         |          |         |   |         |          |          |   |         |          |         |
| H                                              | 1.85403                                                                                                                                                                                                                                                                                                                                                                                                                                                                                                                                                                                                                                                                                                                                                                                                                                                                                                                                                                                                                                                                                                                                                                                                                                                                                                                                                                                                                                                                                                                                                                                                                                                                                                                                                                                                                                                                                                                                                                           | -1.76870 | -0.00560 |         |         |   |          |         |         |   |          |         |          |   |          |         |         |   |         |         |          |   |          |          |          |   |          |         |          |   |         |         |          |   |          |          |         |   |         |         |          |   |         |         |          |   |          |          |          |   |          |          |          |   |          |          |         |   |          |          |         |   |         |         |          |   |         |         |          |   |          |          |         |   |         |          |         |   |         |          |          |   |         |          |         |   |         |         |         |   |         |          |         |   |         |          |         |   |         |          |          |   |         |          |         |
| C                                              | 3.79488                                                                                                                                                                                                                                                                                                                                                                                                                                                                                                                                                                                                                                                                                                                                                                                                                                                                                                                                                                                                                                                                                                                                                                                                                                                                                                                                                                                                                                                                                                                                                                                                                                                                                                                                                                                                                                                                                                                                                                           | -0.91069 | 0.02846  |         |         |   |          |         |         |   |          |         |          |   |          |         |         |   |         |         |          |   |          |          |          |   |          |         |          |   |         |         |          |   |          |          |         |   |         |         |          |   |         |         |          |   |          |          |          |   |          |          |          |   |          |          |         |   |          |          |         |   |         |         |          |   |         |         |          |   |          |          |         |   |         |          |         |   |         |          |          |   |         |          |         |   |         |         |         |   |         |          |         |   |         |          |         |   |         |          |          |   |         |          |         |
| H                                              | 4.34965                                                                                                                                                                                                                                                                                                                                                                                                                                                                                                                                                                                                                                                                                                                                                                                                                                                                                                                                                                                                                                                                                                                                                                                                                                                                                                                                                                                                                                                                                                                                                                                                                                                                                                                                                                                                                                                                                                                                                                           | 0.02570  | 0.03474  |         |         |   |          |         |         |   |          |         |          |   |          |         |         |   |         |         |          |   |          |          |          |   |          |         |          |   |         |         |          |   |          |          |         |   |         |         |          |   |         |         |          |   |          |          |          |   |          |          |          |   |          |          |         |   |          |          |         |   |         |         |          |   |         |         |          |   |          |          |         |   |         |          |         |   |         |          |          |   |         |          |         |   |         |         |         |   |         |          |         |   |         |          |         |   |         |          |          |   |         |          |         |
| C                                              | 4.60216                                                                                                                                                                                                                                                                                                                                                                                                                                                                                                                                                                                                                                                                                                                                                                                                                                                                                                                                                                                                                                                                                                                                                                                                                                                                                                                                                                                                                                                                                                                                                                                                                                                                                                                                                                                                                                                                                                                                                                           | -2.16681 | 0.05136  |         |         |   |          |         |         |   |          |         |          |   |          |         |         |   |         |         |          |   |          |          |          |   |          |         |          |   |         |         |          |   |          |          |         |   |         |         |          |   |         |         |          |   |          |          |          |   |          |          |          |   |          |          |         |   |          |          |         |   |         |         |          |   |         |         |          |   |          |          |         |   |         |          |         |   |         |          |          |   |         |          |         |   |         |         |         |   |         |          |         |   |         |          |         |   |         |          |          |   |         |          |         |
| H                                              | 3.97566                                                                                                                                                                                                                                                                                                                                                                                                                                                                                                                                                                                                                                                                                                                                                                                                                                                                                                                                                                                                                                                                                                                                                                                                                                                                                                                                                                                                                                                                                                                                                                                                                                                                                                                                                                                                                                                                                                                                                                           | -3.06330 | 0.04629  |         |         |   |          |         |         |   |          |         |          |   |          |         |         |   |         |         |          |   |          |          |          |   |          |         |          |   |         |         |          |   |          |          |         |   |         |         |          |   |         |         |          |   |          |          |          |   |          |          |          |   |          |          |         |   |          |          |         |   |         |         |          |   |         |         |          |   |          |          |         |   |         |          |         |   |         |          |          |   |         |          |         |   |         |         |         |   |         |          |         |   |         |          |         |   |         |          |          |   |         |          |         |
| H                                              | 5.27583                                                                                                                                                                                                                                                                                                                                                                                                                                                                                                                                                                                                                                                                                                                                                                                                                                                                                                                                                                                                                                                                                                                                                                                                                                                                                                                                                                                                                                                                                                                                                                                                                                                                                                                                                                                                                                                                                                                                                                           | -2.20203 | -0.81479 |         |         |   |          |         |         |   |          |         |          |   |          |         |         |   |         |         |          |   |          |          |          |   |          |         |          |   |         |         |          |   |          |          |         |   |         |         |          |   |         |         |          |   |          |          |          |   |          |          |          |   |          |          |         |   |          |          |         |   |         |         |          |   |         |         |          |   |          |          |         |   |         |          |         |   |         |          |          |   |         |          |         |   |         |         |         |   |         |          |         |   |         |          |         |   |         |          |          |   |         |          |         |
| H                                              | 5.24431                                                                                                                                                                                                                                                                                                                                                                                                                                                                                                                                                                                                                                                                                                                                                                                                                                                                                                                                                                                                                                                                                                                                                                                                                                                                                                                                                                                                                                                                                                                                                                                                                                                                                                                                                                                                                                                                                                                                                                           | -2.19006 | 0.94150  |         |         |   |          |         |         |   |          |         |          |   |          |         |         |   |         |         |          |   |          |          |          |   |          |         |          |   |         |         |          |   |          |          |         |   |         |         |          |   |         |         |          |   |          |          |          |   |          |          |          |   |          |          |         |   |          |          |         |   |         |         |          |   |         |         |          |   |          |          |         |   |         |          |         |   |         |          |          |   |         |          |         |   |         |         |         |   |         |          |         |   |         |          |         |   |         |          |          |   |         |          |         |

|   |          |          |          |
|---|----------|----------|----------|
| H | -2.81895 | 2.05164  | 0.42331  |
| H | -2.40506 | -1.90470 | -0.41613 |

Optimized Molecular Properties for **Benzaldehyde**

|                                          |                                                                                                                                                                                                                                                                                                                                                                                                                                                                                                                                                                                                                                                                                                                                                                                                                                                                                                                                                                                                                                                                                              |          |          |         |         |   |          |         |         |   |          |         |         |   |          |          |          |   |          |          |         |   |         |         |         |   |         |          |         |   |          |          |         |   |         |         |          |   |          |         |         |   |         |          |          |   |         |          |         |   |         |         |          |   |         |          |          |
|------------------------------------------|----------------------------------------------------------------------------------------------------------------------------------------------------------------------------------------------------------------------------------------------------------------------------------------------------------------------------------------------------------------------------------------------------------------------------------------------------------------------------------------------------------------------------------------------------------------------------------------------------------------------------------------------------------------------------------------------------------------------------------------------------------------------------------------------------------------------------------------------------------------------------------------------------------------------------------------------------------------------------------------------------------------------------------------------------------------------------------------------|----------|----------|---------|---------|---|----------|---------|---------|---|----------|---------|---------|---|----------|----------|----------|---|----------|----------|---------|---|---------|---------|---------|---|---------|----------|---------|---|----------|----------|---------|---|---------|---------|----------|---|----------|---------|---------|---|---------|----------|----------|---|---------|----------|---------|---|---------|---------|----------|---|---------|----------|----------|
| Number of (-)<br>Vibrational Frequencies | 0                                                                                                                                                                                                                                                                                                                                                                                                                                                                                                                                                                                                                                                                                                                                                                                                                                                                                                                                                                                                                                                                                            |          |          |         |         |   |          |         |         |   |          |         |         |   |          |          |          |   |          |          |         |   |         |         |         |   |         |          |         |   |          |          |         |   |         |         |          |   |          |         |         |   |         |          |          |   |         |          |         |   |         |         |          |   |         |          |          |
| Absolute Energies<br>(Hartrees)          | <p><b>B3LYP/6-31G(d)</b></p> <p>There are 0 positive frequencies below 100 cm<sup>-1</sup>.</p> <p>Zero-point correction: 0.110226 hartree<br/>         Enthalpy correction: 0.117457 hartree<br/>         Free Energy correction: 0.079708 hartree<br/>         Quasiharmonic Free Energy correction: 0.079708 hartree</p> <p>SCF Energy: -345.573442 hartree<br/>         SCF Energy + ZPVE: -345.463216 hartree<br/>         Enthalpy: -345.455985 hartree<br/>         Free Energy: -345.493734 hartree</p> <p>Free Energy with quasiharmonic correction: -345.493734 hartree (correction: 0.00 kcal/mol)</p> <p><b>B3LYP-D3/6-311+G(d,p)</b></p> <p>SCF Done: E(RB3LYP) = -345.677065116 A.U.</p>                                                                                                                                                                                                                                                                                                                                                                                       |          |          |         |         |   |          |         |         |   |          |         |         |   |          |          |          |   |          |          |         |   |         |         |         |   |         |          |         |   |          |          |         |   |         |         |          |   |          |         |         |   |         |          |          |   |         |          |         |   |         |         |          |   |         |          |          |
| Cartesian Coordinates                    | <p>14<br/>         spD3-aldehyde.out Energy: -216915.6315764</p> <table> <tr><td>C</td><td>-1.99225</td><td>0.46872</td><td>0.00007</td></tr> <tr><td>C</td><td>-0.53401</td><td>0.21441</td><td>0.00006</td></tr> <tr><td>H</td><td>-2.27404</td><td>1.54570</td><td>0.00015</td></tr> <tr><td>O</td><td>-2.84766</td><td>-0.39585</td><td>-0.00012</td></tr> <tr><td>C</td><td>-0.04519</td><td>-1.10108</td><td>0.00006</td></tr> <tr><td>C</td><td>0.36117</td><td>1.29212</td><td>0.00002</td></tr> <tr><td>C</td><td>1.32635</td><td>-1.33123</td><td>0.00002</td></tr> <tr><td>H</td><td>-0.75893</td><td>-1.91939</td><td>0.00010</td></tr> <tr><td>C</td><td>1.73590</td><td>1.06063</td><td>-0.00004</td></tr> <tr><td>H</td><td>-0.02501</td><td>2.30953</td><td>0.00004</td></tr> <tr><td>C</td><td>2.21686</td><td>-0.25081</td><td>-0.00005</td></tr> <tr><td>H</td><td>1.70780</td><td>-2.34858</td><td>0.00003</td></tr> <tr><td>H</td><td>2.43024</td><td>1.89617</td><td>-0.00010</td></tr> <tr><td>H</td><td>3.28826</td><td>-0.43329</td><td>-0.00009</td></tr> </table> | C        | -1.99225 | 0.46872 | 0.00007 | C | -0.53401 | 0.21441 | 0.00006 | H | -2.27404 | 1.54570 | 0.00015 | O | -2.84766 | -0.39585 | -0.00012 | C | -0.04519 | -1.10108 | 0.00006 | C | 0.36117 | 1.29212 | 0.00002 | C | 1.32635 | -1.33123 | 0.00002 | H | -0.75893 | -1.91939 | 0.00010 | C | 1.73590 | 1.06063 | -0.00004 | H | -0.02501 | 2.30953 | 0.00004 | C | 2.21686 | -0.25081 | -0.00005 | H | 1.70780 | -2.34858 | 0.00003 | H | 2.43024 | 1.89617 | -0.00010 | H | 3.28826 | -0.43329 | -0.00009 |
| C                                        | -1.99225                                                                                                                                                                                                                                                                                                                                                                                                                                                                                                                                                                                                                                                                                                                                                                                                                                                                                                                                                                                                                                                                                     | 0.46872  | 0.00007  |         |         |   |          |         |         |   |          |         |         |   |          |          |          |   |          |          |         |   |         |         |         |   |         |          |         |   |          |          |         |   |         |         |          |   |          |         |         |   |         |          |          |   |         |          |         |   |         |         |          |   |         |          |          |
| C                                        | -0.53401                                                                                                                                                                                                                                                                                                                                                                                                                                                                                                                                                                                                                                                                                                                                                                                                                                                                                                                                                                                                                                                                                     | 0.21441  | 0.00006  |         |         |   |          |         |         |   |          |         |         |   |          |          |          |   |          |          |         |   |         |         |         |   |         |          |         |   |          |          |         |   |         |         |          |   |          |         |         |   |         |          |          |   |         |          |         |   |         |         |          |   |         |          |          |
| H                                        | -2.27404                                                                                                                                                                                                                                                                                                                                                                                                                                                                                                                                                                                                                                                                                                                                                                                                                                                                                                                                                                                                                                                                                     | 1.54570  | 0.00015  |         |         |   |          |         |         |   |          |         |         |   |          |          |          |   |          |          |         |   |         |         |         |   |         |          |         |   |          |          |         |   |         |         |          |   |          |         |         |   |         |          |          |   |         |          |         |   |         |         |          |   |         |          |          |
| O                                        | -2.84766                                                                                                                                                                                                                                                                                                                                                                                                                                                                                                                                                                                                                                                                                                                                                                                                                                                                                                                                                                                                                                                                                     | -0.39585 | -0.00012 |         |         |   |          |         |         |   |          |         |         |   |          |          |          |   |          |          |         |   |         |         |         |   |         |          |         |   |          |          |         |   |         |         |          |   |          |         |         |   |         |          |          |   |         |          |         |   |         |         |          |   |         |          |          |
| C                                        | -0.04519                                                                                                                                                                                                                                                                                                                                                                                                                                                                                                                                                                                                                                                                                                                                                                                                                                                                                                                                                                                                                                                                                     | -1.10108 | 0.00006  |         |         |   |          |         |         |   |          |         |         |   |          |          |          |   |          |          |         |   |         |         |         |   |         |          |         |   |          |          |         |   |         |         |          |   |          |         |         |   |         |          |          |   |         |          |         |   |         |         |          |   |         |          |          |
| C                                        | 0.36117                                                                                                                                                                                                                                                                                                                                                                                                                                                                                                                                                                                                                                                                                                                                                                                                                                                                                                                                                                                                                                                                                      | 1.29212  | 0.00002  |         |         |   |          |         |         |   |          |         |         |   |          |          |          |   |          |          |         |   |         |         |         |   |         |          |         |   |          |          |         |   |         |         |          |   |          |         |         |   |         |          |          |   |         |          |         |   |         |         |          |   |         |          |          |
| C                                        | 1.32635                                                                                                                                                                                                                                                                                                                                                                                                                                                                                                                                                                                                                                                                                                                                                                                                                                                                                                                                                                                                                                                                                      | -1.33123 | 0.00002  |         |         |   |          |         |         |   |          |         |         |   |          |          |          |   |          |          |         |   |         |         |         |   |         |          |         |   |          |          |         |   |         |         |          |   |          |         |         |   |         |          |          |   |         |          |         |   |         |         |          |   |         |          |          |
| H                                        | -0.75893                                                                                                                                                                                                                                                                                                                                                                                                                                                                                                                                                                                                                                                                                                                                                                                                                                                                                                                                                                                                                                                                                     | -1.91939 | 0.00010  |         |         |   |          |         |         |   |          |         |         |   |          |          |          |   |          |          |         |   |         |         |         |   |         |          |         |   |          |          |         |   |         |         |          |   |          |         |         |   |         |          |          |   |         |          |         |   |         |         |          |   |         |          |          |
| C                                        | 1.73590                                                                                                                                                                                                                                                                                                                                                                                                                                                                                                                                                                                                                                                                                                                                                                                                                                                                                                                                                                                                                                                                                      | 1.06063  | -0.00004 |         |         |   |          |         |         |   |          |         |         |   |          |          |          |   |          |          |         |   |         |         |         |   |         |          |         |   |          |          |         |   |         |         |          |   |          |         |         |   |         |          |          |   |         |          |         |   |         |         |          |   |         |          |          |
| H                                        | -0.02501                                                                                                                                                                                                                                                                                                                                                                                                                                                                                                                                                                                                                                                                                                                                                                                                                                                                                                                                                                                                                                                                                     | 2.30953  | 0.00004  |         |         |   |          |         |         |   |          |         |         |   |          |          |          |   |          |          |         |   |         |         |         |   |         |          |         |   |          |          |         |   |         |         |          |   |          |         |         |   |         |          |          |   |         |          |         |   |         |         |          |   |         |          |          |
| C                                        | 2.21686                                                                                                                                                                                                                                                                                                                                                                                                                                                                                                                                                                                                                                                                                                                                                                                                                                                                                                                                                                                                                                                                                      | -0.25081 | -0.00005 |         |         |   |          |         |         |   |          |         |         |   |          |          |          |   |          |          |         |   |         |         |         |   |         |          |         |   |          |          |         |   |         |         |          |   |          |         |         |   |         |          |          |   |         |          |         |   |         |         |          |   |         |          |          |
| H                                        | 1.70780                                                                                                                                                                                                                                                                                                                                                                                                                                                                                                                                                                                                                                                                                                                                                                                                                                                                                                                                                                                                                                                                                      | -2.34858 | 0.00003  |         |         |   |          |         |         |   |          |         |         |   |          |          |          |   |          |          |         |   |         |         |         |   |         |          |         |   |          |          |         |   |         |         |          |   |          |         |         |   |         |          |          |   |         |          |         |   |         |         |          |   |         |          |          |
| H                                        | 2.43024                                                                                                                                                                                                                                                                                                                                                                                                                                                                                                                                                                                                                                                                                                                                                                                                                                                                                                                                                                                                                                                                                      | 1.89617  | -0.00010 |         |         |   |          |         |         |   |          |         |         |   |          |          |          |   |          |          |         |   |         |         |         |   |         |          |         |   |          |          |         |   |         |         |          |   |          |         |         |   |         |          |          |   |         |          |         |   |         |         |          |   |         |          |          |
| H                                        | 3.28826                                                                                                                                                                                                                                                                                                                                                                                                                                                                                                                                                                                                                                                                                                                                                                                                                                                                                                                                                                                                                                                                                      | -0.43329 | -0.00009 |         |         |   |          |         |         |   |          |         |         |   |          |          |          |   |          |          |         |   |         |         |         |   |         |          |         |   |          |          |         |   |         |         |          |   |          |         |         |   |         |          |          |   |         |          |         |   |         |         |          |   |         |          |          |

Optimized Molecular Properties for **Benzaldehyde•H<sub>2</sub>O** Complex

|                                             |                                                                                                                                                                                                                                                                                                                                                                                                                                                                                                                                                                                                                                                                                                                                                                                                                                                                                                                                                                                                                                                                                                                                                                                                                                                                                                         |          |          |         |          |   |          |          |          |   |          |          |          |   |          |         |          |   |          |          |          |   |         |         |          |   |         |         |          |   |         |          |         |   |         |         |          |   |         |          |         |   |         |         |         |   |         |          |         |   |         |         |          |   |         |         |         |   |         |          |         |   |         |         |         |   |          |         |         |
|---------------------------------------------|---------------------------------------------------------------------------------------------------------------------------------------------------------------------------------------------------------------------------------------------------------------------------------------------------------------------------------------------------------------------------------------------------------------------------------------------------------------------------------------------------------------------------------------------------------------------------------------------------------------------------------------------------------------------------------------------------------------------------------------------------------------------------------------------------------------------------------------------------------------------------------------------------------------------------------------------------------------------------------------------------------------------------------------------------------------------------------------------------------------------------------------------------------------------------------------------------------------------------------------------------------------------------------------------------------|----------|----------|---------|----------|---|----------|----------|----------|---|----------|----------|----------|---|----------|---------|----------|---|----------|----------|----------|---|---------|---------|----------|---|---------|---------|----------|---|---------|----------|---------|---|---------|---------|----------|---|---------|----------|---------|---|---------|---------|---------|---|---------|----------|---------|---|---------|---------|----------|---|---------|---------|---------|---|---------|----------|---------|---|---------|---------|---------|---|----------|---------|---------|
| Number of (-)<br>Vibrational<br>Frequencies | 0                                                                                                                                                                                                                                                                                                                                                                                                                                                                                                                                                                                                                                                                                                                                                                                                                                                                                                                                                                                                                                                                                                                                                                                                                                                                                                       |          |          |         |          |   |          |          |          |   |          |          |          |   |          |         |          |   |          |          |          |   |         |         |          |   |         |         |          |   |         |          |         |   |         |         |          |   |         |          |         |   |         |         |         |   |         |          |         |   |         |         |          |   |         |         |         |   |         |          |         |   |         |         |         |   |          |         |         |
| Absolute<br>Energies<br>(Hartrees)          | <p><b>B3LYP/6-31G(d)</b></p> <p>There are 2 positive frequencies below 100 cm<sup>-1</sup>.</p> <p>Zero-point correction: 0.134922 hartree<br/>         Enthalpy correction: 0.145404 hartree<br/>         Free Energy correction: 0.099453 hartree<br/>         Quasiharmonic Free Energy correction: 0.100604 hartree</p> <p>SCF Energy: -421.994653 hartree<br/>         SCF Energy + ZPVE: -421.859731 hartree<br/>         Enthalpy: -421.849249 hartree<br/>         Free Energy: -421.895200 hartree</p> <p>Free Energy with quasiharmonic correction: -421.894049 hartree<br/>         (correction: 0.72 kcal/mol)</p> <p><b>B3LYP-D3/6-311+G(d,p)</b></p> <p>SCF Done: E(RB3LYP) = -422.145624441 A.U.</p>                                                                                                                                                                                                                                                                                                                                                                                                                                                                                                                                                                                     |          |          |         |          |   |          |          |          |   |          |          |          |   |          |         |          |   |          |          |          |   |         |         |          |   |         |         |          |   |         |          |         |   |         |         |          |   |         |          |         |   |         |         |         |   |         |          |         |   |         |         |          |   |         |         |         |   |         |          |         |   |         |         |         |   |          |         |         |
| Cartesian<br>Coordinates                    | <p>17<br/>         spD3-aldw.out Energy: -264900.3766336</p> <table> <tr><td>O</td><td>-4.34154</td><td>0.51018</td><td>-0.07001</td></tr> <tr><td>H</td><td>-3.72372</td><td>-0.24367</td><td>-0.13504</td></tr> <tr><td>O</td><td>-1.93998</td><td>-1.02615</td><td>-0.01792</td></tr> <tr><td>H</td><td>-1.77519</td><td>0.98337</td><td>-0.02521</td></tr> <tr><td>C</td><td>-1.26979</td><td>-0.00161</td><td>-0.01728</td></tr> <tr><td>H</td><td>0.28891</td><td>2.18195</td><td>-0.01818</td></tr> <tr><td>C</td><td>0.20305</td><td>0.02709</td><td>-0.00683</td></tr> <tr><td>H</td><td>0.40506</td><td>-2.11090</td><td>0.00391</td></tr> <tr><td>C</td><td>0.86822</td><td>1.26122</td><td>-0.00828</td></tr> <tr><td>C</td><td>0.94180</td><td>-1.16721</td><td>0.00406</td></tr> <tr><td>C</td><td>2.26122</td><td>1.30480</td><td>0.00125</td></tr> <tr><td>C</td><td>2.33120</td><td>-1.12196</td><td>0.01372</td></tr> <tr><td>H</td><td>2.77736</td><td>2.26054</td><td>-0.00051</td></tr> <tr><td>C</td><td>2.99053</td><td>0.11350</td><td>0.01237</td></tr> <tr><td>H</td><td>2.90623</td><td>-2.04365</td><td>0.02180</td></tr> <tr><td>H</td><td>4.07681</td><td>0.14562</td><td>0.01955</td></tr> <tr><td>H</td><td>-4.66070</td><td>0.45952</td><td>0.84309</td></tr> </table> | O        | -4.34154 | 0.51018 | -0.07001 | H | -3.72372 | -0.24367 | -0.13504 | O | -1.93998 | -1.02615 | -0.01792 | H | -1.77519 | 0.98337 | -0.02521 | C | -1.26979 | -0.00161 | -0.01728 | H | 0.28891 | 2.18195 | -0.01818 | C | 0.20305 | 0.02709 | -0.00683 | H | 0.40506 | -2.11090 | 0.00391 | C | 0.86822 | 1.26122 | -0.00828 | C | 0.94180 | -1.16721 | 0.00406 | C | 2.26122 | 1.30480 | 0.00125 | C | 2.33120 | -1.12196 | 0.01372 | H | 2.77736 | 2.26054 | -0.00051 | C | 2.99053 | 0.11350 | 0.01237 | H | 2.90623 | -2.04365 | 0.02180 | H | 4.07681 | 0.14562 | 0.01955 | H | -4.66070 | 0.45952 | 0.84309 |
| O                                           | -4.34154                                                                                                                                                                                                                                                                                                                                                                                                                                                                                                                                                                                                                                                                                                                                                                                                                                                                                                                                                                                                                                                                                                                                                                                                                                                                                                | 0.51018  | -0.07001 |         |          |   |          |          |          |   |          |          |          |   |          |         |          |   |          |          |          |   |         |         |          |   |         |         |          |   |         |          |         |   |         |         |          |   |         |          |         |   |         |         |         |   |         |          |         |   |         |         |          |   |         |         |         |   |         |          |         |   |         |         |         |   |          |         |         |
| H                                           | -3.72372                                                                                                                                                                                                                                                                                                                                                                                                                                                                                                                                                                                                                                                                                                                                                                                                                                                                                                                                                                                                                                                                                                                                                                                                                                                                                                | -0.24367 | -0.13504 |         |          |   |          |          |          |   |          |          |          |   |          |         |          |   |          |          |          |   |         |         |          |   |         |         |          |   |         |          |         |   |         |         |          |   |         |          |         |   |         |         |         |   |         |          |         |   |         |         |          |   |         |         |         |   |         |          |         |   |         |         |         |   |          |         |         |
| O                                           | -1.93998                                                                                                                                                                                                                                                                                                                                                                                                                                                                                                                                                                                                                                                                                                                                                                                                                                                                                                                                                                                                                                                                                                                                                                                                                                                                                                | -1.02615 | -0.01792 |         |          |   |          |          |          |   |          |          |          |   |          |         |          |   |          |          |          |   |         |         |          |   |         |         |          |   |         |          |         |   |         |         |          |   |         |          |         |   |         |         |         |   |         |          |         |   |         |         |          |   |         |         |         |   |         |          |         |   |         |         |         |   |          |         |         |
| H                                           | -1.77519                                                                                                                                                                                                                                                                                                                                                                                                                                                                                                                                                                                                                                                                                                                                                                                                                                                                                                                                                                                                                                                                                                                                                                                                                                                                                                | 0.98337  | -0.02521 |         |          |   |          |          |          |   |          |          |          |   |          |         |          |   |          |          |          |   |         |         |          |   |         |         |          |   |         |          |         |   |         |         |          |   |         |          |         |   |         |         |         |   |         |          |         |   |         |         |          |   |         |         |         |   |         |          |         |   |         |         |         |   |          |         |         |
| C                                           | -1.26979                                                                                                                                                                                                                                                                                                                                                                                                                                                                                                                                                                                                                                                                                                                                                                                                                                                                                                                                                                                                                                                                                                                                                                                                                                                                                                | -0.00161 | -0.01728 |         |          |   |          |          |          |   |          |          |          |   |          |         |          |   |          |          |          |   |         |         |          |   |         |         |          |   |         |          |         |   |         |         |          |   |         |          |         |   |         |         |         |   |         |          |         |   |         |         |          |   |         |         |         |   |         |          |         |   |         |         |         |   |          |         |         |
| H                                           | 0.28891                                                                                                                                                                                                                                                                                                                                                                                                                                                                                                                                                                                                                                                                                                                                                                                                                                                                                                                                                                                                                                                                                                                                                                                                                                                                                                 | 2.18195  | -0.01818 |         |          |   |          |          |          |   |          |          |          |   |          |         |          |   |          |          |          |   |         |         |          |   |         |         |          |   |         |          |         |   |         |         |          |   |         |          |         |   |         |         |         |   |         |          |         |   |         |         |          |   |         |         |         |   |         |          |         |   |         |         |         |   |          |         |         |
| C                                           | 0.20305                                                                                                                                                                                                                                                                                                                                                                                                                                                                                                                                                                                                                                                                                                                                                                                                                                                                                                                                                                                                                                                                                                                                                                                                                                                                                                 | 0.02709  | -0.00683 |         |          |   |          |          |          |   |          |          |          |   |          |         |          |   |          |          |          |   |         |         |          |   |         |         |          |   |         |          |         |   |         |         |          |   |         |          |         |   |         |         |         |   |         |          |         |   |         |         |          |   |         |         |         |   |         |          |         |   |         |         |         |   |          |         |         |
| H                                           | 0.40506                                                                                                                                                                                                                                                                                                                                                                                                                                                                                                                                                                                                                                                                                                                                                                                                                                                                                                                                                                                                                                                                                                                                                                                                                                                                                                 | -2.11090 | 0.00391  |         |          |   |          |          |          |   |          |          |          |   |          |         |          |   |          |          |          |   |         |         |          |   |         |         |          |   |         |          |         |   |         |         |          |   |         |          |         |   |         |         |         |   |         |          |         |   |         |         |          |   |         |         |         |   |         |          |         |   |         |         |         |   |          |         |         |
| C                                           | 0.86822                                                                                                                                                                                                                                                                                                                                                                                                                                                                                                                                                                                                                                                                                                                                                                                                                                                                                                                                                                                                                                                                                                                                                                                                                                                                                                 | 1.26122  | -0.00828 |         |          |   |          |          |          |   |          |          |          |   |          |         |          |   |          |          |          |   |         |         |          |   |         |         |          |   |         |          |         |   |         |         |          |   |         |          |         |   |         |         |         |   |         |          |         |   |         |         |          |   |         |         |         |   |         |          |         |   |         |         |         |   |          |         |         |
| C                                           | 0.94180                                                                                                                                                                                                                                                                                                                                                                                                                                                                                                                                                                                                                                                                                                                                                                                                                                                                                                                                                                                                                                                                                                                                                                                                                                                                                                 | -1.16721 | 0.00406  |         |          |   |          |          |          |   |          |          |          |   |          |         |          |   |          |          |          |   |         |         |          |   |         |         |          |   |         |          |         |   |         |         |          |   |         |          |         |   |         |         |         |   |         |          |         |   |         |         |          |   |         |         |         |   |         |          |         |   |         |         |         |   |          |         |         |
| C                                           | 2.26122                                                                                                                                                                                                                                                                                                                                                                                                                                                                                                                                                                                                                                                                                                                                                                                                                                                                                                                                                                                                                                                                                                                                                                                                                                                                                                 | 1.30480  | 0.00125  |         |          |   |          |          |          |   |          |          |          |   |          |         |          |   |          |          |          |   |         |         |          |   |         |         |          |   |         |          |         |   |         |         |          |   |         |          |         |   |         |         |         |   |         |          |         |   |         |         |          |   |         |         |         |   |         |          |         |   |         |         |         |   |          |         |         |
| C                                           | 2.33120                                                                                                                                                                                                                                                                                                                                                                                                                                                                                                                                                                                                                                                                                                                                                                                                                                                                                                                                                                                                                                                                                                                                                                                                                                                                                                 | -1.12196 | 0.01372  |         |          |   |          |          |          |   |          |          |          |   |          |         |          |   |          |          |          |   |         |         |          |   |         |         |          |   |         |          |         |   |         |         |          |   |         |          |         |   |         |         |         |   |         |          |         |   |         |         |          |   |         |         |         |   |         |          |         |   |         |         |         |   |          |         |         |
| H                                           | 2.77736                                                                                                                                                                                                                                                                                                                                                                                                                                                                                                                                                                                                                                                                                                                                                                                                                                                                                                                                                                                                                                                                                                                                                                                                                                                                                                 | 2.26054  | -0.00051 |         |          |   |          |          |          |   |          |          |          |   |          |         |          |   |          |          |          |   |         |         |          |   |         |         |          |   |         |          |         |   |         |         |          |   |         |          |         |   |         |         |         |   |         |          |         |   |         |         |          |   |         |         |         |   |         |          |         |   |         |         |         |   |          |         |         |
| C                                           | 2.99053                                                                                                                                                                                                                                                                                                                                                                                                                                                                                                                                                                                                                                                                                                                                                                                                                                                                                                                                                                                                                                                                                                                                                                                                                                                                                                 | 0.11350  | 0.01237  |         |          |   |          |          |          |   |          |          |          |   |          |         |          |   |          |          |          |   |         |         |          |   |         |         |          |   |         |          |         |   |         |         |          |   |         |          |         |   |         |         |         |   |         |          |         |   |         |         |          |   |         |         |         |   |         |          |         |   |         |         |         |   |          |         |         |
| H                                           | 2.90623                                                                                                                                                                                                                                                                                                                                                                                                                                                                                                                                                                                                                                                                                                                                                                                                                                                                                                                                                                                                                                                                                                                                                                                                                                                                                                 | -2.04365 | 0.02180  |         |          |   |          |          |          |   |          |          |          |   |          |         |          |   |          |          |          |   |         |         |          |   |         |         |          |   |         |          |         |   |         |         |          |   |         |          |         |   |         |         |         |   |         |          |         |   |         |         |          |   |         |         |         |   |         |          |         |   |         |         |         |   |          |         |         |
| H                                           | 4.07681                                                                                                                                                                                                                                                                                                                                                                                                                                                                                                                                                                                                                                                                                                                                                                                                                                                                                                                                                                                                                                                                                                                                                                                                                                                                                                 | 0.14562  | 0.01955  |         |          |   |          |          |          |   |          |          |          |   |          |         |          |   |          |          |          |   |         |         |          |   |         |         |          |   |         |          |         |   |         |         |          |   |         |          |         |   |         |         |         |   |         |          |         |   |         |         |          |   |         |         |         |   |         |          |         |   |         |         |         |   |          |         |         |
| H                                           | -4.66070                                                                                                                                                                                                                                                                                                                                                                                                                                                                                                                                                                                                                                                                                                                                                                                                                                                                                                                                                                                                                                                                                                                                                                                                                                                                                                | 0.45952  | 0.84309  |         |          |   |          |          |          |   |          |          |          |   |          |         |          |   |          |          |          |   |         |         |          |   |         |         |          |   |         |          |         |   |         |         |          |   |         |          |         |   |         |         |         |   |         |          |         |   |         |         |          |   |         |         |         |   |         |          |         |   |         |         |         |   |          |         |         |

Optimized Molecular Properties for **Benzaldehyde•MeOH** Complex

|                                                |                                                                                                                                                                                                                                                                                                                                                                                                                                                                                                                                                                                                                                                                                                                                                                                                                                                                                                                                                                                                                                                                                                                                                                                                                                                                                                                                                                                                                                                     |          |          |         |         |   |          |         |         |   |          |          |         |   |          |         |         |   |          |         |          |   |          |          |          |
|------------------------------------------------|-----------------------------------------------------------------------------------------------------------------------------------------------------------------------------------------------------------------------------------------------------------------------------------------------------------------------------------------------------------------------------------------------------------------------------------------------------------------------------------------------------------------------------------------------------------------------------------------------------------------------------------------------------------------------------------------------------------------------------------------------------------------------------------------------------------------------------------------------------------------------------------------------------------------------------------------------------------------------------------------------------------------------------------------------------------------------------------------------------------------------------------------------------------------------------------------------------------------------------------------------------------------------------------------------------------------------------------------------------------------------------------------------------------------------------------------------------|----------|----------|---------|---------|---|----------|---------|---------|---|----------|----------|---------|---|----------|---------|---------|---|----------|---------|----------|---|----------|----------|----------|
| Number of<br>(-)<br>Vibrational<br>Frequencies | 0                                                                                                                                                                                                                                                                                                                                                                                                                                                                                                                                                                                                                                                                                                                                                                                                                                                                                                                                                                                                                                                                                                                                                                                                                                                                                                                                                                                                                                                   |          |          |         |         |   |          |         |         |   |          |          |         |   |          |         |         |   |          |         |          |   |          |          |          |
| Absolute<br>Energies<br>(Hartrees)             | <p><b>B3LYP/6-31G(d)</b></p> <p>There are 4 positive frequencies below 100 cm<sup>-1</sup>.</p> <p>Zero-point correction: 0.164141 hartree<br/>         Enthalpy correction: 0.176010 hartree<br/>         Free Energy correction: 0.125227 hartree<br/>         Quasiharmonic Free Energy correction: 0.127664 hartree</p> <p>SCF Energy: -461.300068 hartree<br/>         SCF Energy + ZPVE: -461.135927 hartree<br/>         Enthalpy: -461.124058 hartree<br/>         Free Energy: -461.174841 hartree</p> <p>Free Energy with quasiharmonic correction: -461.172403 hartree<br/>         (correction: 1.53 kcal/mol)</p> <p><b>B3LYP-D3/6-311+G(d,p)</b></p> <p>SCF Done: E(RB3LYP) = -461.453760075 A.U.</p> <p><b>B3LYP/6-31G(d) (PCM)</b></p> <p>There are 4 positive frequencies below 100 cm<sup>-1</sup>.</p> <p>Zero-point correction: 0.164121 hartree<br/>         Enthalpy correction: 0.175970 hartree<br/>         Free Energy correction: 0.128449 hartree<br/>         Quasiharmonic Free Energy correction: 0.130657 hartree</p> <p>SCF Energy: -461.306922 hartree<br/>         SCF Energy + ZPVE: -461.142801 hartree<br/>         Enthalpy: -461.130952 hartree<br/>         Free Energy: -461.178473 hartree</p> <p>Free Energy with quasiharmonic correction: -461.176264 hartree<br/>         (correction: 1.39 kcal/mol)</p> <p><b>B3LYP-D3/6-311+G(d,p) (PCM)</b></p> <p>SCF Done: E(RB3LYP) = -461.461855051 A.U.</p> |          |          |         |         |   |          |         |         |   |          |          |         |   |          |         |         |   |          |         |          |   |          |          |          |
| Cartesian<br>Coordinates                       | <p>20</p> <p>spD3-aldehyde-meoh.out Energy: -289566.6039527</p> <table> <tr> <td>H</td> <td>-5.19439</td> <td>1.11498</td> <td>0.66348</td> </tr> <tr> <td>C</td> <td>-4.49841</td> <td>0.27001</td> <td>0.66656</td> </tr> <tr> <td>H</td> <td>-5.08849</td> <td>-0.65393</td> <td>0.77729</td> </tr> <tr> <td>H</td> <td>-3.85053</td> <td>0.36675</td> <td>1.55305</td> </tr> <tr> <td>O</td> <td>-3.77621</td> <td>0.31271</td> <td>-0.54913</td> </tr> <tr> <td>H</td> <td>-3.12064</td> <td>-0.41065</td> <td>-0.52644</td> </tr> </table>                                                                                                                                                                                                                                                                                                                                                                                                                                                                                                                                                                                                                                                                                                                                                                                                                                                                                                    | H        | -5.19439 | 1.11498 | 0.66348 | C | -4.49841 | 0.27001 | 0.66656 | H | -5.08849 | -0.65393 | 0.77729 | H | -3.85053 | 0.36675 | 1.55305 | O | -3.77621 | 0.31271 | -0.54913 | H | -3.12064 | -0.41065 | -0.52644 |
| H                                              | -5.19439                                                                                                                                                                                                                                                                                                                                                                                                                                                                                                                                                                                                                                                                                                                                                                                                                                                                                                                                                                                                                                                                                                                                                                                                                                                                                                                                                                                                                                            | 1.11498  | 0.66348  |         |         |   |          |         |         |   |          |          |         |   |          |         |         |   |          |         |          |   |          |          |          |
| C                                              | -4.49841                                                                                                                                                                                                                                                                                                                                                                                                                                                                                                                                                                                                                                                                                                                                                                                                                                                                                                                                                                                                                                                                                                                                                                                                                                                                                                                                                                                                                                            | 0.27001  | 0.66656  |         |         |   |          |         |         |   |          |          |         |   |          |         |         |   |          |         |          |   |          |          |          |
| H                                              | -5.08849                                                                                                                                                                                                                                                                                                                                                                                                                                                                                                                                                                                                                                                                                                                                                                                                                                                                                                                                                                                                                                                                                                                                                                                                                                                                                                                                                                                                                                            | -0.65393 | 0.77729  |         |         |   |          |         |         |   |          |          |         |   |          |         |         |   |          |         |          |   |          |          |          |
| H                                              | -3.85053                                                                                                                                                                                                                                                                                                                                                                                                                                                                                                                                                                                                                                                                                                                                                                                                                                                                                                                                                                                                                                                                                                                                                                                                                                                                                                                                                                                                                                            | 0.36675  | 1.55305  |         |         |   |          |         |         |   |          |          |         |   |          |         |         |   |          |         |          |   |          |          |          |
| O                                              | -3.77621                                                                                                                                                                                                                                                                                                                                                                                                                                                                                                                                                                                                                                                                                                                                                                                                                                                                                                                                                                                                                                                                                                                                                                                                                                                                                                                                                                                                                                            | 0.31271  | -0.54913 |         |         |   |          |         |         |   |          |          |         |   |          |         |         |   |          |         |          |   |          |          |          |
| H                                              | -3.12064                                                                                                                                                                                                                                                                                                                                                                                                                                                                                                                                                                                                                                                                                                                                                                                                                                                                                                                                                                                                                                                                                                                                                                                                                                                                                                                                                                                                                                            | -0.41065 | -0.52644 |         |         |   |          |         |         |   |          |          |         |   |          |         |         |   |          |         |          |   |          |          |          |

|                            |          |          |                 |
|----------------------------|----------|----------|-----------------|
| O                          | -1.34453 | -1.10355 | -0.25684        |
| H                          | -1.22346 | 0.90734  | -0.35680        |
| C                          | -0.70015 | -0.06238 | -0.24845        |
| H                          | 0.80183  | 2.16034  | -0.21544        |
| C                          | 0.76357  | 0.00691  | -0.10107        |
| H                          | 1.01133  | -2.12176 | 0.04001         |
| C                          | 1.39787  | 1.25727  | -0.10350        |
| C                          | 1.52431  | -1.16497 | 0.04168         |
| C                          | 2.78208  | 1.33922  | 0.03609         |
| C                          | 2.90497  | -1.08132 | 0.18074         |
| H                          | 3.27442  | 2.30741  | 0.03416         |
| C                          | 3.53340  | 0.17016  | 0.17805         |
| H                          | 3.49708  | -1.98542 | 0.29112         |
| H                          | 4.61295  | 0.23226  | 0.28672         |
| (PCM)                      |          |          |                 |
| 20                         |          |          |                 |
| spD3-opt-aldehyde-meoh.out |          | Energy:  | -289571.6836268 |
| C                          | -0.21351 | 1.80400  | -0.03358        |
| C                          | 0.76517  | 0.70606  | -0.02023        |
| O                          | -1.42142 | 1.69626  | -0.21067        |
| C                          | 0.37712  | -0.63183 | -0.21830        |
| C                          | 2.11659  | 1.01947  | 0.19811         |
| C                          | 1.33920  | -1.63621 | -0.19683        |
| C                          | 3.07592  | 0.00950  | 0.21881         |
| C                          | 2.68550  | -1.31766 | 0.02112         |
| H                          | 4.12085  | 0.25241  | 0.38721         |
| H                          | 3.43130  | -2.10770 | 0.03625         |
| H                          | 1.04524  | -2.67055 | -0.34993        |
| H                          | -0.66935 | -0.86937 | -0.38802        |
| H                          | 2.40861  | 2.05598  | 0.35054         |
| H                          | 0.21771  | 2.81037  | 0.13679         |
| O                          | -3.02503 | -0.64350 | -0.59623        |
| C                          | -3.64425 | -0.84332 | 0.66575         |
| H                          | -2.91644 | -0.89160 | 1.49002         |
| H                          | -4.37741 | -0.05684 | 0.90039         |
| H                          | -4.17381 | -1.80008 | 0.62387         |
| H                          | -2.52557 | 0.19511  | -0.54098        |



Optimized Molecular Properties for **Benzaldehyde•PhOH** Complex

|                                             |                                                                                                                                                                                                                                                                                                                                                                                                                                                                                                                                                                                                                                                                                                                                                                                                                                                                                                                                                                                                                                                                                                                                                                                                                                                                                                                                                                                                                                                                                                                                                                                                                                                                                                                                                                                                                                                                                                                                                                                                                                   |          |          |  |   |          |          |         |   |         |         |         |   |         |          |         |   |         |          |         |   |         |          |          |   |         |          |         |   |         |         |         |   |         |          |          |   |         |         |         |   |         |          |          |   |         |         |         |   |         |          |          |   |         |         |          |   |         |         |         |   |         |         |          |   |          |          |         |   |          |          |         |   |          |         |          |   |          |         |         |   |          |          |         |   |          |          |          |   |          |         |          |   |          |         |         |   |          |          |         |   |          |          |          |   |          |         |          |   |          |         |          |
|---------------------------------------------|-----------------------------------------------------------------------------------------------------------------------------------------------------------------------------------------------------------------------------------------------------------------------------------------------------------------------------------------------------------------------------------------------------------------------------------------------------------------------------------------------------------------------------------------------------------------------------------------------------------------------------------------------------------------------------------------------------------------------------------------------------------------------------------------------------------------------------------------------------------------------------------------------------------------------------------------------------------------------------------------------------------------------------------------------------------------------------------------------------------------------------------------------------------------------------------------------------------------------------------------------------------------------------------------------------------------------------------------------------------------------------------------------------------------------------------------------------------------------------------------------------------------------------------------------------------------------------------------------------------------------------------------------------------------------------------------------------------------------------------------------------------------------------------------------------------------------------------------------------------------------------------------------------------------------------------------------------------------------------------------------------------------------------------|----------|----------|--|---|----------|----------|---------|---|---------|---------|---------|---|---------|----------|---------|---|---------|----------|---------|---|---------|----------|----------|---|---------|----------|---------|---|---------|---------|---------|---|---------|----------|----------|---|---------|---------|---------|---|---------|----------|----------|---|---------|---------|---------|---|---------|----------|----------|---|---------|---------|----------|---|---------|---------|---------|---|---------|---------|----------|---|----------|----------|---------|---|----------|----------|---------|---|----------|---------|----------|---|----------|---------|---------|---|----------|----------|---------|---|----------|----------|----------|---|----------|---------|----------|---|----------|---------|---------|---|----------|----------|---------|---|----------|----------|----------|---|----------|---------|----------|---|----------|---------|----------|
| Number of (-)<br>Vibrational<br>Frequencies | 0                                                                                                                                                                                                                                                                                                                                                                                                                                                                                                                                                                                                                                                                                                                                                                                                                                                                                                                                                                                                                                                                                                                                                                                                                                                                                                                                                                                                                                                                                                                                                                                                                                                                                                                                                                                                                                                                                                                                                                                                                                 |          |          |  |   |          |          |         |   |         |         |         |   |         |          |         |   |         |          |         |   |         |          |          |   |         |          |         |   |         |         |         |   |         |          |          |   |         |         |         |   |         |          |          |   |         |         |         |   |         |          |          |   |         |         |          |   |         |         |         |   |         |         |          |   |          |          |         |   |          |          |         |   |          |         |          |   |          |         |         |   |          |          |         |   |          |          |          |   |          |         |          |   |          |         |         |   |          |          |         |   |          |          |          |   |          |         |          |   |          |         |          |
| Absolute<br>Energies<br>(Hartrees)          | <p><b>B3LYP/6-31G(d)</b></p> <p>There are 5 positive frequencies below 100 cm<sup>-1</sup>.</p> <p>Zero-point correction: 0.217093 hartree<br/>         Enthalpy correction: 0.231523 hartree<br/>         Free Energy correction: 0.172542 hartree<br/>         Quasiharmonic Free Energy correction: 0.177799 hartree</p> <p>SCF Energy: -653.053009 hartree<br/>         SCF Energy + ZPVE: -652.835916 hartree<br/>         Enthalpy: -652.821486 hartree<br/>         Free Energy: -652.880467 hartree</p> <p>Free Energy with quasiharmonic correction: -652.875210 hartree<br/>         (correction: 3.30 kcal/mol)</p> <p><b>B3LYP-D3/6-311+G(d,p)</b></p> <p>SCF Done: E(RB3LYP) = -653.256466152 A.U.</p>                                                                                                                                                                                                                                                                                                                                                                                                                                                                                                                                                                                                                                                                                                                                                                                                                                                                                                                                                                                                                                                                                                                                                                                                                                                                                                               |          |          |  |   |          |          |         |   |         |         |         |   |         |          |         |   |         |          |         |   |         |          |          |   |         |          |         |   |         |         |         |   |         |          |          |   |         |         |         |   |         |          |          |   |         |         |         |   |         |          |          |   |         |         |          |   |         |         |         |   |         |         |          |   |          |          |         |   |          |          |         |   |          |         |          |   |          |         |         |   |          |          |         |   |          |          |          |   |          |         |          |   |          |         |         |   |          |          |         |   |          |          |          |   |          |         |          |   |          |         |          |
| Cartesian<br>Coordinates                    | <p>27<br/>         spD3-aldph.out Energy: -409924.6181959</p> <table> <tr><td>O</td><td>-1.86005</td><td>-1.00035</td><td>1.24333</td></tr> <tr><td>O</td><td>0.56760</td><td>0.36379</td><td>1.27310</td></tr> <tr><td>H</td><td>0.66904</td><td>-1.23535</td><td>0.04289</td></tr> <tr><td>C</td><td>1.17863</td><td>-0.36374</td><td>0.49779</td></tr> <tr><td>H</td><td>2.59450</td><td>-1.89146</td><td>-1.19025</td></tr> <tr><td>C</td><td>2.58235</td><td>-0.16913</td><td>0.10954</td></tr> <tr><td>H</td><td>2.84576</td><td>1.58206</td><td>1.32720</td></tr> <tr><td>C</td><td>3.17785</td><td>-1.06493</td><td>-0.79057</td></tr> <tr><td>C</td><td>3.32710</td><td>0.90186</td><td>0.63146</td></tr> <tr><td>C</td><td>4.50791</td><td>-0.89395</td><td>-1.16865</td></tr> <tr><td>C</td><td>4.65376</td><td>1.07002</td><td>0.25280</td></tr> <tr><td>H</td><td>4.97042</td><td>-1.58646</td><td>-1.86581</td></tr> <tr><td>C</td><td>5.24343</td><td>0.17280</td><td>-0.64655</td></tr> <tr><td>H</td><td>5.23388</td><td>1.89626</td><td>0.65367</td></tr> <tr><td>H</td><td>6.28095</td><td>0.30753</td><td>-0.94034</td></tr> <tr><td>H</td><td>-1.11498</td><td>-0.37999</td><td>1.40034</td></tr> <tr><td>C</td><td>-2.81873</td><td>-0.39171</td><td>0.49127</td></tr> <tr><td>C</td><td>-4.85974</td><td>0.75677</td><td>-1.05516</td></tr> <tr><td>C</td><td>-2.69928</td><td>0.92908</td><td>0.03584</td></tr> <tr><td>C</td><td>-3.96295</td><td>-1.13482</td><td>0.17063</td></tr> <tr><td>C</td><td>-4.97234</td><td>-0.55935</td><td>-0.59739</td></tr> <tr><td>C</td><td>-3.71887</td><td>1.49294</td><td>-0.73227</td></tr> <tr><td>H</td><td>-1.81192</td><td>1.50534</td><td>0.28574</td></tr> <tr><td>H</td><td>-4.03975</td><td>-2.15539</td><td>0.53358</td></tr> <tr><td>H</td><td>-5.85605</td><td>-1.14481</td><td>-0.83945</td></tr> <tr><td>H</td><td>-3.61634</td><td>2.51857</td><td>-1.07869</td></tr> <tr><td>H</td><td>-5.65054</td><td>1.20111</td><td>-1.65278</td></tr> </table> |          |          |  | O | -1.86005 | -1.00035 | 1.24333 | O | 0.56760 | 0.36379 | 1.27310 | H | 0.66904 | -1.23535 | 0.04289 | C | 1.17863 | -0.36374 | 0.49779 | H | 2.59450 | -1.89146 | -1.19025 | C | 2.58235 | -0.16913 | 0.10954 | H | 2.84576 | 1.58206 | 1.32720 | C | 3.17785 | -1.06493 | -0.79057 | C | 3.32710 | 0.90186 | 0.63146 | C | 4.50791 | -0.89395 | -1.16865 | C | 4.65376 | 1.07002 | 0.25280 | H | 4.97042 | -1.58646 | -1.86581 | C | 5.24343 | 0.17280 | -0.64655 | H | 5.23388 | 1.89626 | 0.65367 | H | 6.28095 | 0.30753 | -0.94034 | H | -1.11498 | -0.37999 | 1.40034 | C | -2.81873 | -0.39171 | 0.49127 | C | -4.85974 | 0.75677 | -1.05516 | C | -2.69928 | 0.92908 | 0.03584 | C | -3.96295 | -1.13482 | 0.17063 | C | -4.97234 | -0.55935 | -0.59739 | C | -3.71887 | 1.49294 | -0.73227 | H | -1.81192 | 1.50534 | 0.28574 | H | -4.03975 | -2.15539 | 0.53358 | H | -5.85605 | -1.14481 | -0.83945 | H | -3.61634 | 2.51857 | -1.07869 | H | -5.65054 | 1.20111 | -1.65278 |
| O                                           | -1.86005                                                                                                                                                                                                                                                                                                                                                                                                                                                                                                                                                                                                                                                                                                                                                                                                                                                                                                                                                                                                                                                                                                                                                                                                                                                                                                                                                                                                                                                                                                                                                                                                                                                                                                                                                                                                                                                                                                                                                                                                                          | -1.00035 | 1.24333  |  |   |          |          |         |   |         |         |         |   |         |          |         |   |         |          |         |   |         |          |          |   |         |          |         |   |         |         |         |   |         |          |          |   |         |         |         |   |         |          |          |   |         |         |         |   |         |          |          |   |         |         |          |   |         |         |         |   |         |         |          |   |          |          |         |   |          |          |         |   |          |         |          |   |          |         |         |   |          |          |         |   |          |          |          |   |          |         |          |   |          |         |         |   |          |          |         |   |          |          |          |   |          |         |          |   |          |         |          |
| O                                           | 0.56760                                                                                                                                                                                                                                                                                                                                                                                                                                                                                                                                                                                                                                                                                                                                                                                                                                                                                                                                                                                                                                                                                                                                                                                                                                                                                                                                                                                                                                                                                                                                                                                                                                                                                                                                                                                                                                                                                                                                                                                                                           | 0.36379  | 1.27310  |  |   |          |          |         |   |         |         |         |   |         |          |         |   |         |          |         |   |         |          |          |   |         |          |         |   |         |         |         |   |         |          |          |   |         |         |         |   |         |          |          |   |         |         |         |   |         |          |          |   |         |         |          |   |         |         |         |   |         |         |          |   |          |          |         |   |          |          |         |   |          |         |          |   |          |         |         |   |          |          |         |   |          |          |          |   |          |         |          |   |          |         |         |   |          |          |         |   |          |          |          |   |          |         |          |   |          |         |          |
| H                                           | 0.66904                                                                                                                                                                                                                                                                                                                                                                                                                                                                                                                                                                                                                                                                                                                                                                                                                                                                                                                                                                                                                                                                                                                                                                                                                                                                                                                                                                                                                                                                                                                                                                                                                                                                                                                                                                                                                                                                                                                                                                                                                           | -1.23535 | 0.04289  |  |   |          |          |         |   |         |         |         |   |         |          |         |   |         |          |         |   |         |          |          |   |         |          |         |   |         |         |         |   |         |          |          |   |         |         |         |   |         |          |          |   |         |         |         |   |         |          |          |   |         |         |          |   |         |         |         |   |         |         |          |   |          |          |         |   |          |          |         |   |          |         |          |   |          |         |         |   |          |          |         |   |          |          |          |   |          |         |          |   |          |         |         |   |          |          |         |   |          |          |          |   |          |         |          |   |          |         |          |
| C                                           | 1.17863                                                                                                                                                                                                                                                                                                                                                                                                                                                                                                                                                                                                                                                                                                                                                                                                                                                                                                                                                                                                                                                                                                                                                                                                                                                                                                                                                                                                                                                                                                                                                                                                                                                                                                                                                                                                                                                                                                                                                                                                                           | -0.36374 | 0.49779  |  |   |          |          |         |   |         |         |         |   |         |          |         |   |         |          |         |   |         |          |          |   |         |          |         |   |         |         |         |   |         |          |          |   |         |         |         |   |         |          |          |   |         |         |         |   |         |          |          |   |         |         |          |   |         |         |         |   |         |         |          |   |          |          |         |   |          |          |         |   |          |         |          |   |          |         |         |   |          |          |         |   |          |          |          |   |          |         |          |   |          |         |         |   |          |          |         |   |          |          |          |   |          |         |          |   |          |         |          |
| H                                           | 2.59450                                                                                                                                                                                                                                                                                                                                                                                                                                                                                                                                                                                                                                                                                                                                                                                                                                                                                                                                                                                                                                                                                                                                                                                                                                                                                                                                                                                                                                                                                                                                                                                                                                                                                                                                                                                                                                                                                                                                                                                                                           | -1.89146 | -1.19025 |  |   |          |          |         |   |         |         |         |   |         |          |         |   |         |          |         |   |         |          |          |   |         |          |         |   |         |         |         |   |         |          |          |   |         |         |         |   |         |          |          |   |         |         |         |   |         |          |          |   |         |         |          |   |         |         |         |   |         |         |          |   |          |          |         |   |          |          |         |   |          |         |          |   |          |         |         |   |          |          |         |   |          |          |          |   |          |         |          |   |          |         |         |   |          |          |         |   |          |          |          |   |          |         |          |   |          |         |          |
| C                                           | 2.58235                                                                                                                                                                                                                                                                                                                                                                                                                                                                                                                                                                                                                                                                                                                                                                                                                                                                                                                                                                                                                                                                                                                                                                                                                                                                                                                                                                                                                                                                                                                                                                                                                                                                                                                                                                                                                                                                                                                                                                                                                           | -0.16913 | 0.10954  |  |   |          |          |         |   |         |         |         |   |         |          |         |   |         |          |         |   |         |          |          |   |         |          |         |   |         |         |         |   |         |          |          |   |         |         |         |   |         |          |          |   |         |         |         |   |         |          |          |   |         |         |          |   |         |         |         |   |         |         |          |   |          |          |         |   |          |          |         |   |          |         |          |   |          |         |         |   |          |          |         |   |          |          |          |   |          |         |          |   |          |         |         |   |          |          |         |   |          |          |          |   |          |         |          |   |          |         |          |
| H                                           | 2.84576                                                                                                                                                                                                                                                                                                                                                                                                                                                                                                                                                                                                                                                                                                                                                                                                                                                                                                                                                                                                                                                                                                                                                                                                                                                                                                                                                                                                                                                                                                                                                                                                                                                                                                                                                                                                                                                                                                                                                                                                                           | 1.58206  | 1.32720  |  |   |          |          |         |   |         |         |         |   |         |          |         |   |         |          |         |   |         |          |          |   |         |          |         |   |         |         |         |   |         |          |          |   |         |         |         |   |         |          |          |   |         |         |         |   |         |          |          |   |         |         |          |   |         |         |         |   |         |         |          |   |          |          |         |   |          |          |         |   |          |         |          |   |          |         |         |   |          |          |         |   |          |          |          |   |          |         |          |   |          |         |         |   |          |          |         |   |          |          |          |   |          |         |          |   |          |         |          |
| C                                           | 3.17785                                                                                                                                                                                                                                                                                                                                                                                                                                                                                                                                                                                                                                                                                                                                                                                                                                                                                                                                                                                                                                                                                                                                                                                                                                                                                                                                                                                                                                                                                                                                                                                                                                                                                                                                                                                                                                                                                                                                                                                                                           | -1.06493 | -0.79057 |  |   |          |          |         |   |         |         |         |   |         |          |         |   |         |          |         |   |         |          |          |   |         |          |         |   |         |         |         |   |         |          |          |   |         |         |         |   |         |          |          |   |         |         |         |   |         |          |          |   |         |         |          |   |         |         |         |   |         |         |          |   |          |          |         |   |          |          |         |   |          |         |          |   |          |         |         |   |          |          |         |   |          |          |          |   |          |         |          |   |          |         |         |   |          |          |         |   |          |          |          |   |          |         |          |   |          |         |          |
| C                                           | 3.32710                                                                                                                                                                                                                                                                                                                                                                                                                                                                                                                                                                                                                                                                                                                                                                                                                                                                                                                                                                                                                                                                                                                                                                                                                                                                                                                                                                                                                                                                                                                                                                                                                                                                                                                                                                                                                                                                                                                                                                                                                           | 0.90186  | 0.63146  |  |   |          |          |         |   |         |         |         |   |         |          |         |   |         |          |         |   |         |          |          |   |         |          |         |   |         |         |         |   |         |          |          |   |         |         |         |   |         |          |          |   |         |         |         |   |         |          |          |   |         |         |          |   |         |         |         |   |         |         |          |   |          |          |         |   |          |          |         |   |          |         |          |   |          |         |         |   |          |          |         |   |          |          |          |   |          |         |          |   |          |         |         |   |          |          |         |   |          |          |          |   |          |         |          |   |          |         |          |
| C                                           | 4.50791                                                                                                                                                                                                                                                                                                                                                                                                                                                                                                                                                                                                                                                                                                                                                                                                                                                                                                                                                                                                                                                                                                                                                                                                                                                                                                                                                                                                                                                                                                                                                                                                                                                                                                                                                                                                                                                                                                                                                                                                                           | -0.89395 | -1.16865 |  |   |          |          |         |   |         |         |         |   |         |          |         |   |         |          |         |   |         |          |          |   |         |          |         |   |         |         |         |   |         |          |          |   |         |         |         |   |         |          |          |   |         |         |         |   |         |          |          |   |         |         |          |   |         |         |         |   |         |         |          |   |          |          |         |   |          |          |         |   |          |         |          |   |          |         |         |   |          |          |         |   |          |          |          |   |          |         |          |   |          |         |         |   |          |          |         |   |          |          |          |   |          |         |          |   |          |         |          |
| C                                           | 4.65376                                                                                                                                                                                                                                                                                                                                                                                                                                                                                                                                                                                                                                                                                                                                                                                                                                                                                                                                                                                                                                                                                                                                                                                                                                                                                                                                                                                                                                                                                                                                                                                                                                                                                                                                                                                                                                                                                                                                                                                                                           | 1.07002  | 0.25280  |  |   |          |          |         |   |         |         |         |   |         |          |         |   |         |          |         |   |         |          |          |   |         |          |         |   |         |         |         |   |         |          |          |   |         |         |         |   |         |          |          |   |         |         |         |   |         |          |          |   |         |         |          |   |         |         |         |   |         |         |          |   |          |          |         |   |          |          |         |   |          |         |          |   |          |         |         |   |          |          |         |   |          |          |          |   |          |         |          |   |          |         |         |   |          |          |         |   |          |          |          |   |          |         |          |   |          |         |          |
| H                                           | 4.97042                                                                                                                                                                                                                                                                                                                                                                                                                                                                                                                                                                                                                                                                                                                                                                                                                                                                                                                                                                                                                                                                                                                                                                                                                                                                                                                                                                                                                                                                                                                                                                                                                                                                                                                                                                                                                                                                                                                                                                                                                           | -1.58646 | -1.86581 |  |   |          |          |         |   |         |         |         |   |         |          |         |   |         |          |         |   |         |          |          |   |         |          |         |   |         |         |         |   |         |          |          |   |         |         |         |   |         |          |          |   |         |         |         |   |         |          |          |   |         |         |          |   |         |         |         |   |         |         |          |   |          |          |         |   |          |          |         |   |          |         |          |   |          |         |         |   |          |          |         |   |          |          |          |   |          |         |          |   |          |         |         |   |          |          |         |   |          |          |          |   |          |         |          |   |          |         |          |
| C                                           | 5.24343                                                                                                                                                                                                                                                                                                                                                                                                                                                                                                                                                                                                                                                                                                                                                                                                                                                                                                                                                                                                                                                                                                                                                                                                                                                                                                                                                                                                                                                                                                                                                                                                                                                                                                                                                                                                                                                                                                                                                                                                                           | 0.17280  | -0.64655 |  |   |          |          |         |   |         |         |         |   |         |          |         |   |         |          |         |   |         |          |          |   |         |          |         |   |         |         |         |   |         |          |          |   |         |         |         |   |         |          |          |   |         |         |         |   |         |          |          |   |         |         |          |   |         |         |         |   |         |         |          |   |          |          |         |   |          |          |         |   |          |         |          |   |          |         |         |   |          |          |         |   |          |          |          |   |          |         |          |   |          |         |         |   |          |          |         |   |          |          |          |   |          |         |          |   |          |         |          |
| H                                           | 5.23388                                                                                                                                                                                                                                                                                                                                                                                                                                                                                                                                                                                                                                                                                                                                                                                                                                                                                                                                                                                                                                                                                                                                                                                                                                                                                                                                                                                                                                                                                                                                                                                                                                                                                                                                                                                                                                                                                                                                                                                                                           | 1.89626  | 0.65367  |  |   |          |          |         |   |         |         |         |   |         |          |         |   |         |          |         |   |         |          |          |   |         |          |         |   |         |         |         |   |         |          |          |   |         |         |         |   |         |          |          |   |         |         |         |   |         |          |          |   |         |         |          |   |         |         |         |   |         |         |          |   |          |          |         |   |          |          |         |   |          |         |          |   |          |         |         |   |          |          |         |   |          |          |          |   |          |         |          |   |          |         |         |   |          |          |         |   |          |          |          |   |          |         |          |   |          |         |          |
| H                                           | 6.28095                                                                                                                                                                                                                                                                                                                                                                                                                                                                                                                                                                                                                                                                                                                                                                                                                                                                                                                                                                                                                                                                                                                                                                                                                                                                                                                                                                                                                                                                                                                                                                                                                                                                                                                                                                                                                                                                                                                                                                                                                           | 0.30753  | -0.94034 |  |   |          |          |         |   |         |         |         |   |         |          |         |   |         |          |         |   |         |          |          |   |         |          |         |   |         |         |         |   |         |          |          |   |         |         |         |   |         |          |          |   |         |         |         |   |         |          |          |   |         |         |          |   |         |         |         |   |         |         |          |   |          |          |         |   |          |          |         |   |          |         |          |   |          |         |         |   |          |          |         |   |          |          |          |   |          |         |          |   |          |         |         |   |          |          |         |   |          |          |          |   |          |         |          |   |          |         |          |
| H                                           | -1.11498                                                                                                                                                                                                                                                                                                                                                                                                                                                                                                                                                                                                                                                                                                                                                                                                                                                                                                                                                                                                                                                                                                                                                                                                                                                                                                                                                                                                                                                                                                                                                                                                                                                                                                                                                                                                                                                                                                                                                                                                                          | -0.37999 | 1.40034  |  |   |          |          |         |   |         |         |         |   |         |          |         |   |         |          |         |   |         |          |          |   |         |          |         |   |         |         |         |   |         |          |          |   |         |         |         |   |         |          |          |   |         |         |         |   |         |          |          |   |         |         |          |   |         |         |         |   |         |         |          |   |          |          |         |   |          |          |         |   |          |         |          |   |          |         |         |   |          |          |         |   |          |          |          |   |          |         |          |   |          |         |         |   |          |          |         |   |          |          |          |   |          |         |          |   |          |         |          |
| C                                           | -2.81873                                                                                                                                                                                                                                                                                                                                                                                                                                                                                                                                                                                                                                                                                                                                                                                                                                                                                                                                                                                                                                                                                                                                                                                                                                                                                                                                                                                                                                                                                                                                                                                                                                                                                                                                                                                                                                                                                                                                                                                                                          | -0.39171 | 0.49127  |  |   |          |          |         |   |         |         |         |   |         |          |         |   |         |          |         |   |         |          |          |   |         |          |         |   |         |         |         |   |         |          |          |   |         |         |         |   |         |          |          |   |         |         |         |   |         |          |          |   |         |         |          |   |         |         |         |   |         |         |          |   |          |          |         |   |          |          |         |   |          |         |          |   |          |         |         |   |          |          |         |   |          |          |          |   |          |         |          |   |          |         |         |   |          |          |         |   |          |          |          |   |          |         |          |   |          |         |          |
| C                                           | -4.85974                                                                                                                                                                                                                                                                                                                                                                                                                                                                                                                                                                                                                                                                                                                                                                                                                                                                                                                                                                                                                                                                                                                                                                                                                                                                                                                                                                                                                                                                                                                                                                                                                                                                                                                                                                                                                                                                                                                                                                                                                          | 0.75677  | -1.05516 |  |   |          |          |         |   |         |         |         |   |         |          |         |   |         |          |         |   |         |          |          |   |         |          |         |   |         |         |         |   |         |          |          |   |         |         |         |   |         |          |          |   |         |         |         |   |         |          |          |   |         |         |          |   |         |         |         |   |         |         |          |   |          |          |         |   |          |          |         |   |          |         |          |   |          |         |         |   |          |          |         |   |          |          |          |   |          |         |          |   |          |         |         |   |          |          |         |   |          |          |          |   |          |         |          |   |          |         |          |
| C                                           | -2.69928                                                                                                                                                                                                                                                                                                                                                                                                                                                                                                                                                                                                                                                                                                                                                                                                                                                                                                                                                                                                                                                                                                                                                                                                                                                                                                                                                                                                                                                                                                                                                                                                                                                                                                                                                                                                                                                                                                                                                                                                                          | 0.92908  | 0.03584  |  |   |          |          |         |   |         |         |         |   |         |          |         |   |         |          |         |   |         |          |          |   |         |          |         |   |         |         |         |   |         |          |          |   |         |         |         |   |         |          |          |   |         |         |         |   |         |          |          |   |         |         |          |   |         |         |         |   |         |         |          |   |          |          |         |   |          |          |         |   |          |         |          |   |          |         |         |   |          |          |         |   |          |          |          |   |          |         |          |   |          |         |         |   |          |          |         |   |          |          |          |   |          |         |          |   |          |         |          |
| C                                           | -3.96295                                                                                                                                                                                                                                                                                                                                                                                                                                                                                                                                                                                                                                                                                                                                                                                                                                                                                                                                                                                                                                                                                                                                                                                                                                                                                                                                                                                                                                                                                                                                                                                                                                                                                                                                                                                                                                                                                                                                                                                                                          | -1.13482 | 0.17063  |  |   |          |          |         |   |         |         |         |   |         |          |         |   |         |          |         |   |         |          |          |   |         |          |         |   |         |         |         |   |         |          |          |   |         |         |         |   |         |          |          |   |         |         |         |   |         |          |          |   |         |         |          |   |         |         |         |   |         |         |          |   |          |          |         |   |          |          |         |   |          |         |          |   |          |         |         |   |          |          |         |   |          |          |          |   |          |         |          |   |          |         |         |   |          |          |         |   |          |          |          |   |          |         |          |   |          |         |          |
| C                                           | -4.97234                                                                                                                                                                                                                                                                                                                                                                                                                                                                                                                                                                                                                                                                                                                                                                                                                                                                                                                                                                                                                                                                                                                                                                                                                                                                                                                                                                                                                                                                                                                                                                                                                                                                                                                                                                                                                                                                                                                                                                                                                          | -0.55935 | -0.59739 |  |   |          |          |         |   |         |         |         |   |         |          |         |   |         |          |         |   |         |          |          |   |         |          |         |   |         |         |         |   |         |          |          |   |         |         |         |   |         |          |          |   |         |         |         |   |         |          |          |   |         |         |          |   |         |         |         |   |         |         |          |   |          |          |         |   |          |          |         |   |          |         |          |   |          |         |         |   |          |          |         |   |          |          |          |   |          |         |          |   |          |         |         |   |          |          |         |   |          |          |          |   |          |         |          |   |          |         |          |
| C                                           | -3.71887                                                                                                                                                                                                                                                                                                                                                                                                                                                                                                                                                                                                                                                                                                                                                                                                                                                                                                                                                                                                                                                                                                                                                                                                                                                                                                                                                                                                                                                                                                                                                                                                                                                                                                                                                                                                                                                                                                                                                                                                                          | 1.49294  | -0.73227 |  |   |          |          |         |   |         |         |         |   |         |          |         |   |         |          |         |   |         |          |          |   |         |          |         |   |         |         |         |   |         |          |          |   |         |         |         |   |         |          |          |   |         |         |         |   |         |          |          |   |         |         |          |   |         |         |         |   |         |         |          |   |          |          |         |   |          |          |         |   |          |         |          |   |          |         |         |   |          |          |         |   |          |          |          |   |          |         |          |   |          |         |         |   |          |          |         |   |          |          |          |   |          |         |          |   |          |         |          |
| H                                           | -1.81192                                                                                                                                                                                                                                                                                                                                                                                                                                                                                                                                                                                                                                                                                                                                                                                                                                                                                                                                                                                                                                                                                                                                                                                                                                                                                                                                                                                                                                                                                                                                                                                                                                                                                                                                                                                                                                                                                                                                                                                                                          | 1.50534  | 0.28574  |  |   |          |          |         |   |         |         |         |   |         |          |         |   |         |          |         |   |         |          |          |   |         |          |         |   |         |         |         |   |         |          |          |   |         |         |         |   |         |          |          |   |         |         |         |   |         |          |          |   |         |         |          |   |         |         |         |   |         |         |          |   |          |          |         |   |          |          |         |   |          |         |          |   |          |         |         |   |          |          |         |   |          |          |          |   |          |         |          |   |          |         |         |   |          |          |         |   |          |          |          |   |          |         |          |   |          |         |          |
| H                                           | -4.03975                                                                                                                                                                                                                                                                                                                                                                                                                                                                                                                                                                                                                                                                                                                                                                                                                                                                                                                                                                                                                                                                                                                                                                                                                                                                                                                                                                                                                                                                                                                                                                                                                                                                                                                                                                                                                                                                                                                                                                                                                          | -2.15539 | 0.53358  |  |   |          |          |         |   |         |         |         |   |         |          |         |   |         |          |         |   |         |          |          |   |         |          |         |   |         |         |         |   |         |          |          |   |         |         |         |   |         |          |          |   |         |         |         |   |         |          |          |   |         |         |          |   |         |         |         |   |         |         |          |   |          |          |         |   |          |          |         |   |          |         |          |   |          |         |         |   |          |          |         |   |          |          |          |   |          |         |          |   |          |         |         |   |          |          |         |   |          |          |          |   |          |         |          |   |          |         |          |
| H                                           | -5.85605                                                                                                                                                                                                                                                                                                                                                                                                                                                                                                                                                                                                                                                                                                                                                                                                                                                                                                                                                                                                                                                                                                                                                                                                                                                                                                                                                                                                                                                                                                                                                                                                                                                                                                                                                                                                                                                                                                                                                                                                                          | -1.14481 | -0.83945 |  |   |          |          |         |   |         |         |         |   |         |          |         |   |         |          |         |   |         |          |          |   |         |          |         |   |         |         |         |   |         |          |          |   |         |         |         |   |         |          |          |   |         |         |         |   |         |          |          |   |         |         |          |   |         |         |         |   |         |         |          |   |          |          |         |   |          |          |         |   |          |         |          |   |          |         |         |   |          |          |         |   |          |          |          |   |          |         |          |   |          |         |         |   |          |          |         |   |          |          |          |   |          |         |          |   |          |         |          |
| H                                           | -3.61634                                                                                                                                                                                                                                                                                                                                                                                                                                                                                                                                                                                                                                                                                                                                                                                                                                                                                                                                                                                                                                                                                                                                                                                                                                                                                                                                                                                                                                                                                                                                                                                                                                                                                                                                                                                                                                                                                                                                                                                                                          | 2.51857  | -1.07869 |  |   |          |          |         |   |         |         |         |   |         |          |         |   |         |          |         |   |         |          |          |   |         |          |         |   |         |         |         |   |         |          |          |   |         |         |         |   |         |          |          |   |         |         |         |   |         |          |          |   |         |         |          |   |         |         |         |   |         |         |          |   |          |          |         |   |          |          |         |   |          |         |          |   |          |         |         |   |          |          |         |   |          |          |          |   |          |         |          |   |          |         |         |   |          |          |         |   |          |          |          |   |          |         |          |   |          |         |          |
| H                                           | -5.65054                                                                                                                                                                                                                                                                                                                                                                                                                                                                                                                                                                                                                                                                                                                                                                                                                                                                                                                                                                                                                                                                                                                                                                                                                                                                                                                                                                                                                                                                                                                                                                                                                                                                                                                                                                                                                                                                                                                                                                                                                          | 1.20111  | -1.65278 |  |   |          |          |         |   |         |         |         |   |         |          |         |   |         |          |         |   |         |          |          |   |         |          |         |   |         |         |         |   |         |          |          |   |         |         |         |   |         |          |          |   |         |         |         |   |         |          |          |   |         |         |          |   |         |         |         |   |         |         |          |   |          |          |         |   |          |          |         |   |          |         |          |   |          |         |         |   |          |          |         |   |          |          |          |   |          |         |          |   |          |         |         |   |          |          |         |   |          |          |          |   |          |         |          |   |          |         |          |

Optimized Molecular Properties for Ser•His•Asp Complex

|                                             |                                                                                                                                                                                                                                                                                                                                                                                                                                                                                                                                                                                                                                                                                                                     |                         |                   |
|---------------------------------------------|---------------------------------------------------------------------------------------------------------------------------------------------------------------------------------------------------------------------------------------------------------------------------------------------------------------------------------------------------------------------------------------------------------------------------------------------------------------------------------------------------------------------------------------------------------------------------------------------------------------------------------------------------------------------------------------------------------------------|-------------------------|-------------------|
| Number of (-)<br>Vibrational<br>Frequencies | 0                                                                                                                                                                                                                                                                                                                                                                                                                                                                                                                                                                                                                                                                                                                   |                         |                   |
| Absolute<br>Energies<br>(Hartrees)          | <p><b>B3LYP/6-31G(d)</b></p> <p>There are 8 positive frequencies below 100 cm<sup>-1</sup>.</p> <p>Zero-point correction: 0.201978 hartree<br/>         Enthalpy correction: 0.218822 hartree<br/>         Free Energy correction: 0.153150 hartree<br/>         Quasiharmonic Free Energy correction: 0.159256 hartree</p> <p>SCF Energy: -609.826255 hartree<br/>         SCF Energy + ZPVE: -609.624277 hartree<br/>         Enthalpy: -609.607433 hartree<br/>         Free Energy: -609.673105 hartree</p> <p>Free Energy with quasiharmonic correction: -609.666998 hartree<br/>         (correction: 3.83 kcal/mol)</p> <p><b>B3LYP-D3/6-311+G(d,p)</b></p> <p>SCF Done: E(RB3LYP) = -610.058895229 A.U.</p> |                         |                   |
| Cartesian<br>Coordinates                    | 25<br>spD3-SerHisAsp.out                                                                                                                                                                                                                                                                                                                                                                                                                                                                                                                                                                                                                                                                                            | Energy: -382817.7334039 |                   |
|                                             | O                                                                                                                                                                                                                                                                                                                                                                                                                                                                                                                                                                                                                                                                                                                   | 4.31122                 | -1.14935 -0.53977 |
|                                             | C                                                                                                                                                                                                                                                                                                                                                                                                                                                                                                                                                                                                                                                                                                                   | -3.15525                | -0.90297 0.01088  |
|                                             | O                                                                                                                                                                                                                                                                                                                                                                                                                                                                                                                                                                                                                                                                                                                   | -2.30639                | -1.79806 -0.17756 |
|                                             | O                                                                                                                                                                                                                                                                                                                                                                                                                                                                                                                                                                                                                                                                                                                   | -2.94874                | 0.35158 0.13806   |
|                                             | C                                                                                                                                                                                                                                                                                                                                                                                                                                                                                                                                                                                                                                                                                                                   | 0.41505                 | 1.86737 0.01255   |
|                                             | C                                                                                                                                                                                                                                                                                                                                                                                                                                                                                                                                                                                                                                                                                                                   | 1.72932                 | 1.48759 -0.15287  |
|                                             | N                                                                                                                                                                                                                                                                                                                                                                                                                                                                                                                                                                                                                                                                                                                   | -0.31652                | 0.70428 -0.06828  |
|                                             | C                                                                                                                                                                                                                                                                                                                                                                                                                                                                                                                                                                                                                                                                                                                   | 0.55694                 | -0.30479 -0.27381 |
|                                             | N                                                                                                                                                                                                                                                                                                                                                                                                                                                                                                                                                                                                                                                                                                                   | 1.81528                 | 0.12315 -0.33296  |
|                                             | H                                                                                                                                                                                                                                                                                                                                                                                                                                                                                                                                                                                                                                                                                                                   | 2.61352                 | 2.11393 -0.15402  |
|                                             | H                                                                                                                                                                                                                                                                                                                                                                                                                                                                                                                                                                                                                                                                                                                   | -1.38342                | 0.57614 0.01509   |
|                                             | H                                                                                                                                                                                                                                                                                                                                                                                                                                                                                                                                                                                                                                                                                                                   | 3.40824                 | -0.72976 -0.55029 |
|                                             | H                                                                                                                                                                                                                                                                                                                                                                                                                                                                                                                                                                                                                                                                                                                   | 0.20867                 | -1.32346 -0.37012 |
|                                             | C                                                                                                                                                                                                                                                                                                                                                                                                                                                                                                                                                                                                                                                                                                                   | -4.64295                | -1.31594 0.11191  |
|                                             | H                                                                                                                                                                                                                                                                                                                                                                                                                                                                                                                                                                                                                                                                                                                   | -5.04563                | -1.02546 1.09091  |
|                                             | H                                                                                                                                                                                                                                                                                                                                                                                                                                                                                                                                                                                                                                                                                                                   | -5.23295                | -0.78217 -0.64406 |
|                                             | H                                                                                                                                                                                                                                                                                                                                                                                                                                                                                                                                                                                                                                                                                                                   | -4.76435                | -2.39488 -0.02482 |
|                                             | C                                                                                                                                                                                                                                                                                                                                                                                                                                                                                                                                                                                                                                                                                                                   | -0.21256                | 3.20582 0.23750   |
|                                             | H                                                                                                                                                                                                                                                                                                                                                                                                                                                                                                                                                                                                                                                                                                                   | -0.92949                | 3.46146 -0.55413  |
|                                             | H                                                                                                                                                                                                                                                                                                                                                                                                                                                                                                                                                                                                                                                                                                                   | -0.76184                | 3.24813 1.18759   |
|                                             | H                                                                                                                                                                                                                                                                                                                                                                                                                                                                                                                                                                                                                                                                                                                   | 0.55708                 | 3.98560 0.25897   |
|                                             | C                                                                                                                                                                                                                                                                                                                                                                                                                                                                                                                                                                                                                                                                                                                   | 4.45199                 | -1.75896 0.71492  |
|                                             | H                                                                                                                                                                                                                                                                                                                                                                                                                                                                                                                                                                                                                                                                                                                   | 5.46328                 | -2.18479 0.77833  |
|                                             | H                                                                                                                                                                                                                                                                                                                                                                                                                                                                                                                                                                                                                                                                                                                   | 4.33532                 | -1.05430 1.55838  |
|                                             | H                                                                                                                                                                                                                                                                                                                                                                                                                                                                                                                                                                                                                                                                                                                   | 3.73614                 | -2.58446 0.88470  |

Optimized Molecular Properties for **Ser•His** Complex

|                                             |                                                                                                                                                                                                                                                                                                                                                                                                                                                                                                                                                                                                                                                                                                                                                                                                                                                                                                                                                                                                                                                                                                                                                                                                                                                                                                                                                                              |          |          |          |          |   |         |          |         |   |         |          |          |   |         |         |         |   |         |         |          |   |          |         |          |   |         |          |          |   |         |         |         |   |          |         |          |   |          |         |         |   |         |          |         |   |         |          |          |   |         |          |         |   |         |          |          |   |          |          |         |   |          |         |         |   |          |          |         |   |          |          |         |
|---------------------------------------------|------------------------------------------------------------------------------------------------------------------------------------------------------------------------------------------------------------------------------------------------------------------------------------------------------------------------------------------------------------------------------------------------------------------------------------------------------------------------------------------------------------------------------------------------------------------------------------------------------------------------------------------------------------------------------------------------------------------------------------------------------------------------------------------------------------------------------------------------------------------------------------------------------------------------------------------------------------------------------------------------------------------------------------------------------------------------------------------------------------------------------------------------------------------------------------------------------------------------------------------------------------------------------------------------------------------------------------------------------------------------------|----------|----------|----------|----------|---|---------|----------|---------|---|---------|----------|----------|---|---------|---------|---------|---|---------|---------|----------|---|----------|---------|----------|---|---------|----------|----------|---|---------|---------|---------|---|----------|---------|----------|---|----------|---------|---------|---|---------|----------|---------|---|---------|----------|----------|---|---------|----------|---------|---|---------|----------|----------|---|----------|----------|---------|---|----------|---------|---------|---|----------|----------|---------|---|----------|----------|---------|
| Number of (-)<br>Vibrational<br>Frequencies | 0                                                                                                                                                                                                                                                                                                                                                                                                                                                                                                                                                                                                                                                                                                                                                                                                                                                                                                                                                                                                                                                                                                                                                                                                                                                                                                                                                                            |          |          |          |          |   |         |          |         |   |         |          |          |   |         |         |         |   |         |         |          |   |          |         |          |   |         |          |          |   |         |         |         |   |          |         |          |   |          |         |         |   |         |          |         |   |         |          |          |   |         |          |         |   |         |          |          |   |          |          |         |   |          |         |         |   |          |          |         |   |          |          |         |
| Absolute<br>Energies<br>(Hartrees)          | <p><b>B3LYP/6-31G(d) (PCM)</b></p> <p>There are 3 positive frequencies below 100 cm<sup>-1</sup>.</p> <p>Zero-point correction: 0.152634 hartree<br/>         Enthalpy correction: 0.163704 hartree<br/>         Free Energy correction: 0.117510 hartree<br/>         Quasiharmonic Free Energy correction: 0.120499 hartree</p> <p>SCF Energy: -381.273591 hartree<br/>         SCF Energy + ZPVE: -381.120957 hartree<br/>         Enthalpy: -381.109887 hartree<br/>         Free Energy: -381.156081 hartree</p> <p>Free Energy with quasiharmonic correction: -381.153092 hartree<br/>         (correction: 1.88 kcal/mol)</p> <p><b>B3LYP-D3/6-311+G(d,p) (PCM)</b></p> <p>SCF Done: E(RB3LYP) = -381.409063251 A.U.</p>                                                                                                                                                                                                                                                                                                                                                                                                                                                                                                                                                                                                                                              |          |          |          |          |   |         |          |         |   |         |          |          |   |         |         |         |   |         |         |          |   |          |         |          |   |         |          |          |   |         |         |         |   |          |         |          |   |          |         |         |   |         |          |         |   |         |          |          |   |         |          |         |   |         |          |          |   |          |          |         |   |          |         |         |   |          |          |         |   |          |          |         |
| Cartesian<br>Coordinates                    | <p>18</p> <p>spD3-HisSer.out Energy: -239337.7987524</p> <table> <tr><td>O</td><td>-3.12400</td><td>-0.04521</td><td>-0.65352</td></tr> <tr><td>C</td><td>1.91326</td><td>-0.26033</td><td>0.01224</td></tr> <tr><td>C</td><td>0.67565</td><td>-0.80427</td><td>-0.23342</td></tr> <tr><td>N</td><td>1.67040</td><td>1.09502</td><td>0.15548</td></tr> <tr><td>C</td><td>0.33577</td><td>1.30633</td><td>-0.00561</td></tr> <tr><td>N</td><td>-0.29881</td><td>0.17480</td><td>-0.24266</td></tr> <tr><td>H</td><td>0.43230</td><td>-1.84410</td><td>-0.40442</td></tr> <tr><td>H</td><td>2.36418</td><td>1.80595</td><td>0.34394</td></tr> <tr><td>H</td><td>-2.14429</td><td>0.01851</td><td>-0.55767</td></tr> <tr><td>H</td><td>-0.11398</td><td>2.28731</td><td>0.05755</td></tr> <tr><td>C</td><td>3.27429</td><td>-0.86447</td><td>0.12546</td></tr> <tr><td>H</td><td>3.96723</td><td>-0.45480</td><td>-0.62008</td></tr> <tr><td>H</td><td>3.71619</td><td>-0.69624</td><td>1.11556</td></tr> <tr><td>H</td><td>3.21345</td><td>-1.94444</td><td>-0.03356</td></tr> <tr><td>C</td><td>-3.63829</td><td>-0.40641</td><td>0.61064</td></tr> <tr><td>H</td><td>-3.40822</td><td>0.33360</td><td>1.39579</td></tr> <tr><td>H</td><td>-4.72887</td><td>-0.47184</td><td>0.52487</td></tr> <tr><td>H</td><td>-3.27122</td><td>-1.38613</td><td>0.96059</td></tr> </table> | O        | -3.12400 | -0.04521 | -0.65352 | C | 1.91326 | -0.26033 | 0.01224 | C | 0.67565 | -0.80427 | -0.23342 | N | 1.67040 | 1.09502 | 0.15548 | C | 0.33577 | 1.30633 | -0.00561 | N | -0.29881 | 0.17480 | -0.24266 | H | 0.43230 | -1.84410 | -0.40442 | H | 2.36418 | 1.80595 | 0.34394 | H | -2.14429 | 0.01851 | -0.55767 | H | -0.11398 | 2.28731 | 0.05755 | C | 3.27429 | -0.86447 | 0.12546 | H | 3.96723 | -0.45480 | -0.62008 | H | 3.71619 | -0.69624 | 1.11556 | H | 3.21345 | -1.94444 | -0.03356 | C | -3.63829 | -0.40641 | 0.61064 | H | -3.40822 | 0.33360 | 1.39579 | H | -4.72887 | -0.47184 | 0.52487 | H | -3.27122 | -1.38613 | 0.96059 |
| O                                           | -3.12400                                                                                                                                                                                                                                                                                                                                                                                                                                                                                                                                                                                                                                                                                                                                                                                                                                                                                                                                                                                                                                                                                                                                                                                                                                                                                                                                                                     | -0.04521 | -0.65352 |          |          |   |         |          |         |   |         |          |          |   |         |         |         |   |         |         |          |   |          |         |          |   |         |          |          |   |         |         |         |   |          |         |          |   |          |         |         |   |         |          |         |   |         |          |          |   |         |          |         |   |         |          |          |   |          |          |         |   |          |         |         |   |          |          |         |   |          |          |         |
| C                                           | 1.91326                                                                                                                                                                                                                                                                                                                                                                                                                                                                                                                                                                                                                                                                                                                                                                                                                                                                                                                                                                                                                                                                                                                                                                                                                                                                                                                                                                      | -0.26033 | 0.01224  |          |          |   |         |          |         |   |         |          |          |   |         |         |         |   |         |         |          |   |          |         |          |   |         |          |          |   |         |         |         |   |          |         |          |   |          |         |         |   |         |          |         |   |         |          |          |   |         |          |         |   |         |          |          |   |          |          |         |   |          |         |         |   |          |          |         |   |          |          |         |
| C                                           | 0.67565                                                                                                                                                                                                                                                                                                                                                                                                                                                                                                                                                                                                                                                                                                                                                                                                                                                                                                                                                                                                                                                                                                                                                                                                                                                                                                                                                                      | -0.80427 | -0.23342 |          |          |   |         |          |         |   |         |          |          |   |         |         |         |   |         |         |          |   |          |         |          |   |         |          |          |   |         |         |         |   |          |         |          |   |          |         |         |   |         |          |         |   |         |          |          |   |         |          |         |   |         |          |          |   |          |          |         |   |          |         |         |   |          |          |         |   |          |          |         |
| N                                           | 1.67040                                                                                                                                                                                                                                                                                                                                                                                                                                                                                                                                                                                                                                                                                                                                                                                                                                                                                                                                                                                                                                                                                                                                                                                                                                                                                                                                                                      | 1.09502  | 0.15548  |          |          |   |         |          |         |   |         |          |          |   |         |         |         |   |         |         |          |   |          |         |          |   |         |          |          |   |         |         |         |   |          |         |          |   |          |         |         |   |         |          |         |   |         |          |          |   |         |          |         |   |         |          |          |   |          |          |         |   |          |         |         |   |          |          |         |   |          |          |         |
| C                                           | 0.33577                                                                                                                                                                                                                                                                                                                                                                                                                                                                                                                                                                                                                                                                                                                                                                                                                                                                                                                                                                                                                                                                                                                                                                                                                                                                                                                                                                      | 1.30633  | -0.00561 |          |          |   |         |          |         |   |         |          |          |   |         |         |         |   |         |         |          |   |          |         |          |   |         |          |          |   |         |         |         |   |          |         |          |   |          |         |         |   |         |          |         |   |         |          |          |   |         |          |         |   |         |          |          |   |          |          |         |   |          |         |         |   |          |          |         |   |          |          |         |
| N                                           | -0.29881                                                                                                                                                                                                                                                                                                                                                                                                                                                                                                                                                                                                                                                                                                                                                                                                                                                                                                                                                                                                                                                                                                                                                                                                                                                                                                                                                                     | 0.17480  | -0.24266 |          |          |   |         |          |         |   |         |          |          |   |         |         |         |   |         |         |          |   |          |         |          |   |         |          |          |   |         |         |         |   |          |         |          |   |          |         |         |   |         |          |         |   |         |          |          |   |         |          |         |   |         |          |          |   |          |          |         |   |          |         |         |   |          |          |         |   |          |          |         |
| H                                           | 0.43230                                                                                                                                                                                                                                                                                                                                                                                                                                                                                                                                                                                                                                                                                                                                                                                                                                                                                                                                                                                                                                                                                                                                                                                                                                                                                                                                                                      | -1.84410 | -0.40442 |          |          |   |         |          |         |   |         |          |          |   |         |         |         |   |         |         |          |   |          |         |          |   |         |          |          |   |         |         |         |   |          |         |          |   |          |         |         |   |         |          |         |   |         |          |          |   |         |          |         |   |         |          |          |   |          |          |         |   |          |         |         |   |          |          |         |   |          |          |         |
| H                                           | 2.36418                                                                                                                                                                                                                                                                                                                                                                                                                                                                                                                                                                                                                                                                                                                                                                                                                                                                                                                                                                                                                                                                                                                                                                                                                                                                                                                                                                      | 1.80595  | 0.34394  |          |          |   |         |          |         |   |         |          |          |   |         |         |         |   |         |         |          |   |          |         |          |   |         |          |          |   |         |         |         |   |          |         |          |   |          |         |         |   |         |          |         |   |         |          |          |   |         |          |         |   |         |          |          |   |          |          |         |   |          |         |         |   |          |          |         |   |          |          |         |
| H                                           | -2.14429                                                                                                                                                                                                                                                                                                                                                                                                                                                                                                                                                                                                                                                                                                                                                                                                                                                                                                                                                                                                                                                                                                                                                                                                                                                                                                                                                                     | 0.01851  | -0.55767 |          |          |   |         |          |         |   |         |          |          |   |         |         |         |   |         |         |          |   |          |         |          |   |         |          |          |   |         |         |         |   |          |         |          |   |          |         |         |   |         |          |         |   |         |          |          |   |         |          |         |   |         |          |          |   |          |          |         |   |          |         |         |   |          |          |         |   |          |          |         |
| H                                           | -0.11398                                                                                                                                                                                                                                                                                                                                                                                                                                                                                                                                                                                                                                                                                                                                                                                                                                                                                                                                                                                                                                                                                                                                                                                                                                                                                                                                                                     | 2.28731  | 0.05755  |          |          |   |         |          |         |   |         |          |          |   |         |         |         |   |         |         |          |   |          |         |          |   |         |          |          |   |         |         |         |   |          |         |          |   |          |         |         |   |         |          |         |   |         |          |          |   |         |          |         |   |         |          |          |   |          |          |         |   |          |         |         |   |          |          |         |   |          |          |         |
| C                                           | 3.27429                                                                                                                                                                                                                                                                                                                                                                                                                                                                                                                                                                                                                                                                                                                                                                                                                                                                                                                                                                                                                                                                                                                                                                                                                                                                                                                                                                      | -0.86447 | 0.12546  |          |          |   |         |          |         |   |         |          |          |   |         |         |         |   |         |         |          |   |          |         |          |   |         |          |          |   |         |         |         |   |          |         |          |   |          |         |         |   |         |          |         |   |         |          |          |   |         |          |         |   |         |          |          |   |          |          |         |   |          |         |         |   |          |          |         |   |          |          |         |
| H                                           | 3.96723                                                                                                                                                                                                                                                                                                                                                                                                                                                                                                                                                                                                                                                                                                                                                                                                                                                                                                                                                                                                                                                                                                                                                                                                                                                                                                                                                                      | -0.45480 | -0.62008 |          |          |   |         |          |         |   |         |          |          |   |         |         |         |   |         |         |          |   |          |         |          |   |         |          |          |   |         |         |         |   |          |         |          |   |          |         |         |   |         |          |         |   |         |          |          |   |         |          |         |   |         |          |          |   |          |          |         |   |          |         |         |   |          |          |         |   |          |          |         |
| H                                           | 3.71619                                                                                                                                                                                                                                                                                                                                                                                                                                                                                                                                                                                                                                                                                                                                                                                                                                                                                                                                                                                                                                                                                                                                                                                                                                                                                                                                                                      | -0.69624 | 1.11556  |          |          |   |         |          |         |   |         |          |          |   |         |         |         |   |         |         |          |   |          |         |          |   |         |          |          |   |         |         |         |   |          |         |          |   |          |         |         |   |         |          |         |   |         |          |          |   |         |          |         |   |         |          |          |   |          |          |         |   |          |         |         |   |          |          |         |   |          |          |         |
| H                                           | 3.21345                                                                                                                                                                                                                                                                                                                                                                                                                                                                                                                                                                                                                                                                                                                                                                                                                                                                                                                                                                                                                                                                                                                                                                                                                                                                                                                                                                      | -1.94444 | -0.03356 |          |          |   |         |          |         |   |         |          |          |   |         |         |         |   |         |         |          |   |          |         |          |   |         |          |          |   |         |         |         |   |          |         |          |   |          |         |         |   |         |          |         |   |         |          |          |   |         |          |         |   |         |          |          |   |          |          |         |   |          |         |         |   |          |          |         |   |          |          |         |
| C                                           | -3.63829                                                                                                                                                                                                                                                                                                                                                                                                                                                                                                                                                                                                                                                                                                                                                                                                                                                                                                                                                                                                                                                                                                                                                                                                                                                                                                                                                                     | -0.40641 | 0.61064  |          |          |   |         |          |         |   |         |          |          |   |         |         |         |   |         |         |          |   |          |         |          |   |         |          |          |   |         |         |         |   |          |         |          |   |          |         |         |   |         |          |         |   |         |          |          |   |         |          |         |   |         |          |          |   |          |          |         |   |          |         |         |   |          |          |         |   |          |          |         |
| H                                           | -3.40822                                                                                                                                                                                                                                                                                                                                                                                                                                                                                                                                                                                                                                                                                                                                                                                                                                                                                                                                                                                                                                                                                                                                                                                                                                                                                                                                                                     | 0.33360  | 1.39579  |          |          |   |         |          |         |   |         |          |          |   |         |         |         |   |         |         |          |   |          |         |          |   |         |          |          |   |         |         |         |   |          |         |          |   |          |         |         |   |         |          |         |   |         |          |          |   |         |          |         |   |         |          |          |   |          |          |         |   |          |         |         |   |          |          |         |   |          |          |         |
| H                                           | -4.72887                                                                                                                                                                                                                                                                                                                                                                                                                                                                                                                                                                                                                                                                                                                                                                                                                                                                                                                                                                                                                                                                                                                                                                                                                                                                                                                                                                     | -0.47184 | 0.52487  |          |          |   |         |          |         |   |         |          |          |   |         |         |         |   |         |         |          |   |          |         |          |   |         |          |          |   |         |         |         |   |          |         |          |   |          |         |         |   |         |          |         |   |         |          |          |   |         |          |         |   |         |          |          |   |          |          |         |   |          |         |         |   |          |          |         |   |          |          |         |
| H                                           | -3.27122                                                                                                                                                                                                                                                                                                                                                                                                                                                                                                                                                                                                                                                                                                                                                                                                                                                                                                                                                                                                                                                                                                                                                                                                                                                                                                                                                                     | -1.38613 | 0.96059  |          |          |   |         |          |         |   |         |          |          |   |         |         |         |   |         |         |          |   |          |         |          |   |         |          |          |   |         |         |         |   |          |         |          |   |          |         |         |   |         |          |         |   |         |          |          |   |         |          |         |   |         |          |          |   |          |          |         |   |          |         |         |   |          |          |         |   |          |          |         |

Optimized Molecular Properties for His•Asp Complex

|                                             |                                                                                                                                                                                                                                                                                                                                                                                                                                                                                                                                                                                                                                                                                                                                                                                                                                                                                                                                                                                                                                                                                                                                                                                                                                                                                                                                                                                                                                                     |          |          |          |          |   |          |          |          |   |          |         |          |   |         |         |         |   |         |          |         |   |         |          |          |   |         |          |         |
|---------------------------------------------|-----------------------------------------------------------------------------------------------------------------------------------------------------------------------------------------------------------------------------------------------------------------------------------------------------------------------------------------------------------------------------------------------------------------------------------------------------------------------------------------------------------------------------------------------------------------------------------------------------------------------------------------------------------------------------------------------------------------------------------------------------------------------------------------------------------------------------------------------------------------------------------------------------------------------------------------------------------------------------------------------------------------------------------------------------------------------------------------------------------------------------------------------------------------------------------------------------------------------------------------------------------------------------------------------------------------------------------------------------------------------------------------------------------------------------------------------------|----------|----------|----------|----------|---|----------|----------|----------|---|----------|---------|----------|---|---------|---------|---------|---|---------|----------|---------|---|---------|----------|----------|---|---------|----------|---------|
| Number of (-)<br>Vibrational<br>Frequencies | 0                                                                                                                                                                                                                                                                                                                                                                                                                                                                                                                                                                                                                                                                                                                                                                                                                                                                                                                                                                                                                                                                                                                                                                                                                                                                                                                                                                                                                                                   |          |          |          |          |   |          |          |          |   |          |         |          |   |         |         |         |   |         |          |         |   |         |          |          |   |         |          |         |
| Absolute<br>Energies<br>(Hartrees)          | <p><b>B3LYP/6-31G(d)</b></p> <p>There are 5 positive frequencies below 100 cm<sup>-1</sup>.</p> <p>Zero-point correction: 0.148911 hartree<br/>         Enthalpy correction: 0.161094 hartree<br/>         Free Energy correction: 0.109097 hartree<br/>         Quasiharmonic Free Energy correction: 0.111742 hartree</p> <p>SCF Energy: -494.087328 hartree<br/>         SCF Energy + ZPVE: -493.938417 hartree<br/>         Enthalpy: -493.926234 hartree<br/>         Free Energy: -493.978231 hartree</p> <p>Free Energy with quasiharmonic correction: -493.975585 hartree<br/>         (correction: 1.66 kcal/mol)</p> <p><b>B3LYP-D3/6-311+G(d,p)</b></p> <p>SCF Done: E(RB3LYP) = -494.268994031 A.U.</p> <p><b>B3LYP/6-31G(d) (PCM)</b></p> <p>There are 5 positive frequencies below 100 cm<sup>-1</sup>.</p> <p>Zero-point correction: 0.149246 hartree<br/>         Enthalpy correction: 0.161366 hartree<br/>         Free Energy correction: 0.112803 hartree<br/>         Quasiharmonic Free Energy correction: 0.115068 hartree</p> <p>SCF Energy: -494.151013 hartree<br/>         SCF Energy + ZPVE: -494.001767 hartree<br/>         Enthalpy: -493.989647 hartree<br/>         Free Energy: -494.038210 hartree</p> <p>Free Energy with quasiharmonic correction: -494.035944 hartree<br/>         (correction: 1.42 kcal/mol)</p> <p><b>B3LYP-D3/6-311+G(d,p) (PCM)</b></p> <p>SCF Done: E(RB3LYP) = -494.332809983 A.U.</p> |          |          |          |          |   |          |          |          |   |          |         |          |   |         |         |         |   |         |          |         |   |         |          |          |   |         |          |         |
| Cartesian<br>Coordinates                    | <p>19<br/>         spD3-asphis.out Energy: -310158.4739876</p> <table> <tr> <td>C</td> <td>-2.48174</td> <td>-0.03927</td> <td>-0.00085</td> </tr> <tr> <td>O</td> <td>-2.19514</td> <td>-1.25441</td> <td>-0.00059</td> </tr> <tr> <td>O</td> <td>-1.68162</td> <td>0.95408</td> <td>-0.00110</td> </tr> <tr> <td>C</td> <td>2.02674</td> <td>0.60394</td> <td>0.00006</td> </tr> <tr> <td>C</td> <td>2.98741</td> <td>-0.38756</td> <td>0.00045</td> </tr> <tr> <td>N</td> <td>0.82247</td> <td>-0.06093</td> <td>-0.00021</td> </tr> <tr> <td>C</td> <td>1.10503</td> <td>-1.38744</td> <td>0.00007</td> </tr> </table>                                                                                                                                                                                                                                                                                                                                                                                                                                                                                                                                                                                                                                                                                                                                                                                                                          | C        | -2.48174 | -0.03927 | -0.00085 | O | -2.19514 | -1.25441 | -0.00059 | O | -1.68162 | 0.95408 | -0.00110 | C | 2.02674 | 0.60394 | 0.00006 | C | 2.98741 | -0.38756 | 0.00045 | N | 0.82247 | -0.06093 | -0.00021 | C | 1.10503 | -1.38744 | 0.00007 |
| C                                           | -2.48174                                                                                                                                                                                                                                                                                                                                                                                                                                                                                                                                                                                                                                                                                                                                                                                                                                                                                                                                                                                                                                                                                                                                                                                                                                                                                                                                                                                                                                            | -0.03927 | -0.00085 |          |          |   |          |          |          |   |          |         |          |   |         |         |         |   |         |          |         |   |         |          |          |   |         |          |         |
| O                                           | -2.19514                                                                                                                                                                                                                                                                                                                                                                                                                                                                                                                                                                                                                                                                                                                                                                                                                                                                                                                                                                                                                                                                                                                                                                                                                                                                                                                                                                                                                                            | -1.25441 | -0.00059 |          |          |   |          |          |          |   |          |         |          |   |         |         |         |   |         |          |         |   |         |          |          |   |         |          |         |
| O                                           | -1.68162                                                                                                                                                                                                                                                                                                                                                                                                                                                                                                                                                                                                                                                                                                                                                                                                                                                                                                                                                                                                                                                                                                                                                                                                                                                                                                                                                                                                                                            | 0.95408  | -0.00110 |          |          |   |          |          |          |   |          |         |          |   |         |         |         |   |         |          |         |   |         |          |          |   |         |          |         |
| C                                           | 2.02674                                                                                                                                                                                                                                                                                                                                                                                                                                                                                                                                                                                                                                                                                                                                                                                                                                                                                                                                                                                                                                                                                                                                                                                                                                                                                                                                                                                                                                             | 0.60394  | 0.00006  |          |          |   |          |          |          |   |          |         |          |   |         |         |         |   |         |          |         |   |         |          |          |   |         |          |         |
| C                                           | 2.98741                                                                                                                                                                                                                                                                                                                                                                                                                                                                                                                                                                                                                                                                                                                                                                                                                                                                                                                                                                                                                                                                                                                                                                                                                                                                                                                                                                                                                                             | -0.38756 | 0.00045  |          |          |   |          |          |          |   |          |         |          |   |         |         |         |   |         |          |         |   |         |          |          |   |         |          |         |
| N                                           | 0.82247                                                                                                                                                                                                                                                                                                                                                                                                                                                                                                                                                                                                                                                                                                                                                                                                                                                                                                                                                                                                                                                                                                                                                                                                                                                                                                                                                                                                                                             | -0.06093 | -0.00021 |          |          |   |          |          |          |   |          |         |          |   |         |         |         |   |         |          |         |   |         |          |          |   |         |          |         |
| C                                           | 1.10503                                                                                                                                                                                                                                                                                                                                                                                                                                                                                                                                                                                                                                                                                                                                                                                                                                                                                                                                                                                                                                                                                                                                                                                                                                                                                                                                                                                                                                             | -1.38744 | 0.00007  |          |          |   |          |          |          |   |          |         |          |   |         |         |         |   |         |          |         |   |         |          |          |   |         |          |         |

|                                      |          |          |          |
|--------------------------------------|----------|----------|----------|
| N                                    | 2.40903  | -1.63866 | 0.00026  |
| H                                    | 4.06561  | -0.26148 | 0.00073  |
| H                                    | -0.16143 | 0.35046  | -0.00060 |
| H                                    | 0.30300  | -2.11311 | -0.00013 |
| C                                    | -3.98178 | 0.35318  | 0.00113  |
| H                                    | -4.20959 | 0.95673  | 0.88954  |
| H                                    | -4.20713 | 0.97914  | -0.87214 |
| H                                    | -4.62478 | -0.53274 | -0.01021 |
| C                                    | 2.13298  | 2.09564  | 0.00009  |
| H                                    | 1.65377  | 2.54554  | -0.88046 |
| H                                    | 1.65561  | 2.54548  | 0.88169  |
| H                                    | 3.18664  | 2.39881  | -0.00097 |
| (PCM)                                |          |          |          |
| 19                                   |          |          |          |
| spD3-CAT.out Energy: -310198.5191017 |          |          |          |
| H                                    | 4.48346  | -0.11597 | -0.87848 |
| H                                    | -1.75890 | 2.54013  | -0.88338 |
| H                                    | 4.19128  | 1.40980  | 0.00127  |
| C                                    | 4.00508  | 0.33179  | 0.00146  |
| H                                    | -3.27927 | 2.34059  | 0.00269  |
| C                                    | -2.21673 | 2.07612  | 0.00022  |
| O                                    | 1.70094  | 0.99564  | -0.00151 |
| C                                    | 2.49626  | 0.00043  | -0.00034 |
| H                                    | 0.13231  | 0.39389  | -0.00114 |
| C                                    | -2.05802 | 0.58885  | 0.00014  |
| O                                    | 2.18554  | -1.21431 | -0.00047 |
| H                                    | -4.06383 | -0.34536 | 0.00138  |
| N                                    | -0.83140 | -0.03906 | -0.00052 |
| C                                    | -2.98312 | -0.43462 | 0.00069  |
| H                                    | 4.48114  | -0.11524 | 0.88302  |
| H                                    | -1.75467 | 2.54030  | 0.88150  |
| C                                    | -1.06638 | -1.37584 | -0.00037 |
| N                                    | -2.36059 | -1.66719 | 0.00036  |
| H                                    | -0.24205 | -2.07555 | -0.00071 |

Optimized Molecular Properties for **T1-complex**

|                                                |                                                                                                                                                                                                                                                                                                                                                                                                                                                                                                                                                                                                                                                                                                                                                                                                                                                                                                                                                                                                                                                                                                                                                                                                                                                                                                                                                                                                                                                                                                                                                                                                                                                                                                                                                                                                                                                                                                                                                           |          |          |   |          |          |          |   |         |          |         |   |         |          |         |   |         |         |         |   |         |         |          |   |         |         |          |   |         |         |          |   |         |          |          |   |         |          |          |   |          |         |          |   |         |         |          |   |          |          |          |   |         |          |         |   |         |          |         |   |         |          |         |   |         |         |         |   |         |          |         |   |         |         |          |   |         |         |          |   |         |         |          |   |         |         |          |   |          |          |         |   |          |         |         |   |          |         |         |   |          |          |          |   |          |          |          |
|------------------------------------------------|-----------------------------------------------------------------------------------------------------------------------------------------------------------------------------------------------------------------------------------------------------------------------------------------------------------------------------------------------------------------------------------------------------------------------------------------------------------------------------------------------------------------------------------------------------------------------------------------------------------------------------------------------------------------------------------------------------------------------------------------------------------------------------------------------------------------------------------------------------------------------------------------------------------------------------------------------------------------------------------------------------------------------------------------------------------------------------------------------------------------------------------------------------------------------------------------------------------------------------------------------------------------------------------------------------------------------------------------------------------------------------------------------------------------------------------------------------------------------------------------------------------------------------------------------------------------------------------------------------------------------------------------------------------------------------------------------------------------------------------------------------------------------------------------------------------------------------------------------------------------------------------------------------------------------------------------------------------|----------|----------|---|----------|----------|----------|---|---------|----------|---------|---|---------|----------|---------|---|---------|---------|---------|---|---------|---------|----------|---|---------|---------|----------|---|---------|---------|----------|---|---------|----------|----------|---|---------|----------|----------|---|----------|---------|----------|---|---------|---------|----------|---|----------|----------|----------|---|---------|----------|---------|---|---------|----------|---------|---|---------|----------|---------|---|---------|---------|---------|---|---------|----------|---------|---|---------|---------|----------|---|---------|---------|----------|---|---------|---------|----------|---|---------|---------|----------|---|----------|----------|---------|---|----------|---------|---------|---|----------|---------|---------|---|----------|----------|----------|---|----------|----------|----------|
| Number of<br>(-)<br>Vibrational<br>Frequencies | 0                                                                                                                                                                                                                                                                                                                                                                                                                                                                                                                                                                                                                                                                                                                                                                                                                                                                                                                                                                                                                                                                                                                                                                                                                                                                                                                                                                                                                                                                                                                                                                                                                                                                                                                                                                                                                                                                                                                                                         |          |          |   |          |          |          |   |         |          |         |   |         |          |         |   |         |         |         |   |         |         |          |   |         |         |          |   |         |         |          |   |         |          |          |   |         |          |          |   |          |         |          |   |         |         |          |   |          |          |          |   |         |          |         |   |         |          |         |   |         |          |         |   |         |         |         |   |         |          |         |   |         |         |          |   |         |         |          |   |         |         |          |   |         |         |          |   |          |          |         |   |          |         |         |   |          |         |         |   |          |          |          |   |          |          |          |
| Absolute<br>Energies<br>(Hartrees)             | <p><b>B3LYP/6-31G(d)</b></p> <p>There are 14 positive frequencies below 100 cm<sup>-1</sup>.</p> <p>Zero-point correction: 0.326707 hartree<br/>         Enthalpy correction: 0.353876 hartree<br/>         Free Energy correction: 0.258942 hartree<br/>         Quasiharmonic Free Energy correction: 0.273283 hartree</p> <p>SCF Energy: -955.626206 hartree<br/>         SCF Energy + ZPVE: -955.299499 hartree<br/>         Enthalpy: -955.272330 hartree<br/>         Free Energy: -955.367264 hartree</p> <p>Free Energy with quasiharmonic correction: -955.352923 hartree<br/>         (correction: 9.00 kcal/mol)</p> <p><b>B3LYP-D3/6-311+G(d,p)</b></p> <p>SCF Done: E(RB3LYP) = -955.975311554 A.U.</p>                                                                                                                                                                                                                                                                                                                                                                                                                                                                                                                                                                                                                                                                                                                                                                                                                                                                                                                                                                                                                                                                                                                                                                                                                                      |          |          |   |          |          |          |   |         |          |         |   |         |          |         |   |         |         |         |   |         |         |          |   |         |         |          |   |         |         |          |   |         |          |          |   |         |          |          |   |          |         |          |   |         |         |          |   |          |          |          |   |         |          |         |   |         |          |         |   |         |          |         |   |         |         |         |   |         |          |         |   |         |         |          |   |         |         |          |   |         |         |          |   |         |         |          |   |          |          |         |   |          |         |         |   |          |         |         |   |          |          |          |   |          |          |          |
| Cartesian<br>Coordinates                       | <p>40</p> <p>spD3-complex-T1.out Energy: -599883.5601304</p> <table> <tr><td>O</td><td>-1.24506</td><td>-2.16247</td><td>-0.72010</td></tr> <tr><td>C</td><td>5.74832</td><td>-0.33875</td><td>0.59733</td></tr> <tr><td>O</td><td>5.01371</td><td>-1.33209</td><td>0.77228</td></tr> <tr><td>O</td><td>5.41258</td><td>0.80342</td><td>0.13074</td></tr> <tr><td>C</td><td>1.97195</td><td>1.60502</td><td>-0.92176</td></tr> <tr><td>C</td><td>0.73805</td><td>0.99672</td><td>-0.99294</td></tr> <tr><td>N</td><td>2.82212</td><td>0.65585</td><td>-0.40077</td></tr> <tr><td>C</td><td>2.09506</td><td>-0.45830</td><td>-0.18158</td></tr> <tr><td>N</td><td>0.81786</td><td>-0.30053</td><td>-0.52640</td></tr> <tr><td>H</td><td>-0.19652</td><td>1.41290</td><td>-1.34927</td></tr> <tr><td>H</td><td>3.88147</td><td>0.73788</td><td>-0.18949</td></tr> <tr><td>H</td><td>-0.48850</td><td>-1.51865</td><td>-0.61047</td></tr> <tr><td>H</td><td>2.55678</td><td>-1.34571</td><td>0.22785</td></tr> <tr><td>C</td><td>7.24257</td><td>-0.45678</td><td>0.97513</td></tr> <tr><td>H</td><td>7.86844</td><td>-0.24920</td><td>0.09787</td></tr> <tr><td>H</td><td>7.49762</td><td>0.29639</td><td>1.73154</td></tr> <tr><td>H</td><td>7.47489</td><td>-1.45382</td><td>1.36134</td></tr> <tr><td>C</td><td>2.42351</td><td>2.98158</td><td>-1.29191</td></tr> <tr><td>H</td><td>2.82799</td><td>3.52634</td><td>-0.42863</td></tr> <tr><td>H</td><td>3.21400</td><td>2.96206</td><td>-2.05368</td></tr> <tr><td>H</td><td>1.58386</td><td>3.56059</td><td>-1.69197</td></tr> <tr><td>C</td><td>-3.00545</td><td>-0.35260</td><td>1.25552</td></tr> <tr><td>C</td><td>-5.28292</td><td>0.56864</td><td>0.79991</td></tr> <tr><td>O</td><td>-6.27205</td><td>1.18286</td><td>1.16541</td></tr> <tr><td>C</td><td>-1.16356</td><td>-2.68494</td><td>-2.02191</td></tr> <tr><td>H</td><td>-1.99313</td><td>-3.39060</td><td>-2.16037</td></tr> </table> |          |          | O | -1.24506 | -2.16247 | -0.72010 | C | 5.74832 | -0.33875 | 0.59733 | O | 5.01371 | -1.33209 | 0.77228 | O | 5.41258 | 0.80342 | 0.13074 | C | 1.97195 | 1.60502 | -0.92176 | C | 0.73805 | 0.99672 | -0.99294 | N | 2.82212 | 0.65585 | -0.40077 | C | 2.09506 | -0.45830 | -0.18158 | N | 0.81786 | -0.30053 | -0.52640 | H | -0.19652 | 1.41290 | -1.34927 | H | 3.88147 | 0.73788 | -0.18949 | H | -0.48850 | -1.51865 | -0.61047 | H | 2.55678 | -1.34571 | 0.22785 | C | 7.24257 | -0.45678 | 0.97513 | H | 7.86844 | -0.24920 | 0.09787 | H | 7.49762 | 0.29639 | 1.73154 | H | 7.47489 | -1.45382 | 1.36134 | C | 2.42351 | 2.98158 | -1.29191 | H | 2.82799 | 3.52634 | -0.42863 | H | 3.21400 | 2.96206 | -2.05368 | H | 1.58386 | 3.56059 | -1.69197 | C | -3.00545 | -0.35260 | 1.25552 | C | -5.28292 | 0.56864 | 0.79991 | O | -6.27205 | 1.18286 | 1.16541 | C | -1.16356 | -2.68494 | -2.02191 | H | -1.99313 | -3.39060 | -2.16037 |
| O                                              | -1.24506                                                                                                                                                                                                                                                                                                                                                                                                                                                                                                                                                                                                                                                                                                                                                                                                                                                                                                                                                                                                                                                                                                                                                                                                                                                                                                                                                                                                                                                                                                                                                                                                                                                                                                                                                                                                                                                                                                                                                  | -2.16247 | -0.72010 |   |          |          |          |   |         |          |         |   |         |          |         |   |         |         |         |   |         |         |          |   |         |         |          |   |         |         |          |   |         |          |          |   |         |          |          |   |          |         |          |   |         |         |          |   |          |          |          |   |         |          |         |   |         |          |         |   |         |          |         |   |         |         |         |   |         |          |         |   |         |         |          |   |         |         |          |   |         |         |          |   |         |         |          |   |          |          |         |   |          |         |         |   |          |         |         |   |          |          |          |   |          |          |          |
| C                                              | 5.74832                                                                                                                                                                                                                                                                                                                                                                                                                                                                                                                                                                                                                                                                                                                                                                                                                                                                                                                                                                                                                                                                                                                                                                                                                                                                                                                                                                                                                                                                                                                                                                                                                                                                                                                                                                                                                                                                                                                                                   | -0.33875 | 0.59733  |   |          |          |          |   |         |          |         |   |         |          |         |   |         |         |         |   |         |         |          |   |         |         |          |   |         |         |          |   |         |          |          |   |         |          |          |   |          |         |          |   |         |         |          |   |          |          |          |   |         |          |         |   |         |          |         |   |         |          |         |   |         |         |         |   |         |          |         |   |         |         |          |   |         |         |          |   |         |         |          |   |         |         |          |   |          |          |         |   |          |         |         |   |          |         |         |   |          |          |          |   |          |          |          |
| O                                              | 5.01371                                                                                                                                                                                                                                                                                                                                                                                                                                                                                                                                                                                                                                                                                                                                                                                                                                                                                                                                                                                                                                                                                                                                                                                                                                                                                                                                                                                                                                                                                                                                                                                                                                                                                                                                                                                                                                                                                                                                                   | -1.33209 | 0.77228  |   |          |          |          |   |         |          |         |   |         |          |         |   |         |         |         |   |         |         |          |   |         |         |          |   |         |         |          |   |         |          |          |   |         |          |          |   |          |         |          |   |         |         |          |   |          |          |          |   |         |          |         |   |         |          |         |   |         |          |         |   |         |         |         |   |         |          |         |   |         |         |          |   |         |         |          |   |         |         |          |   |         |         |          |   |          |          |         |   |          |         |         |   |          |         |         |   |          |          |          |   |          |          |          |
| O                                              | 5.41258                                                                                                                                                                                                                                                                                                                                                                                                                                                                                                                                                                                                                                                                                                                                                                                                                                                                                                                                                                                                                                                                                                                                                                                                                                                                                                                                                                                                                                                                                                                                                                                                                                                                                                                                                                                                                                                                                                                                                   | 0.80342  | 0.13074  |   |          |          |          |   |         |          |         |   |         |          |         |   |         |         |         |   |         |         |          |   |         |         |          |   |         |         |          |   |         |          |          |   |         |          |          |   |          |         |          |   |         |         |          |   |          |          |          |   |         |          |         |   |         |          |         |   |         |          |         |   |         |         |         |   |         |          |         |   |         |         |          |   |         |         |          |   |         |         |          |   |         |         |          |   |          |          |         |   |          |         |         |   |          |         |         |   |          |          |          |   |          |          |          |
| C                                              | 1.97195                                                                                                                                                                                                                                                                                                                                                                                                                                                                                                                                                                                                                                                                                                                                                                                                                                                                                                                                                                                                                                                                                                                                                                                                                                                                                                                                                                                                                                                                                                                                                                                                                                                                                                                                                                                                                                                                                                                                                   | 1.60502  | -0.92176 |   |          |          |          |   |         |          |         |   |         |          |         |   |         |         |         |   |         |         |          |   |         |         |          |   |         |         |          |   |         |          |          |   |         |          |          |   |          |         |          |   |         |         |          |   |          |          |          |   |         |          |         |   |         |          |         |   |         |          |         |   |         |         |         |   |         |          |         |   |         |         |          |   |         |         |          |   |         |         |          |   |         |         |          |   |          |          |         |   |          |         |         |   |          |         |         |   |          |          |          |   |          |          |          |
| C                                              | 0.73805                                                                                                                                                                                                                                                                                                                                                                                                                                                                                                                                                                                                                                                                                                                                                                                                                                                                                                                                                                                                                                                                                                                                                                                                                                                                                                                                                                                                                                                                                                                                                                                                                                                                                                                                                                                                                                                                                                                                                   | 0.99672  | -0.99294 |   |          |          |          |   |         |          |         |   |         |          |         |   |         |         |         |   |         |         |          |   |         |         |          |   |         |         |          |   |         |          |          |   |         |          |          |   |          |         |          |   |         |         |          |   |          |          |          |   |         |          |         |   |         |          |         |   |         |          |         |   |         |         |         |   |         |          |         |   |         |         |          |   |         |         |          |   |         |         |          |   |         |         |          |   |          |          |         |   |          |         |         |   |          |         |         |   |          |          |          |   |          |          |          |
| N                                              | 2.82212                                                                                                                                                                                                                                                                                                                                                                                                                                                                                                                                                                                                                                                                                                                                                                                                                                                                                                                                                                                                                                                                                                                                                                                                                                                                                                                                                                                                                                                                                                                                                                                                                                                                                                                                                                                                                                                                                                                                                   | 0.65585  | -0.40077 |   |          |          |          |   |         |          |         |   |         |          |         |   |         |         |         |   |         |         |          |   |         |         |          |   |         |         |          |   |         |          |          |   |         |          |          |   |          |         |          |   |         |         |          |   |          |          |          |   |         |          |         |   |         |          |         |   |         |          |         |   |         |         |         |   |         |          |         |   |         |         |          |   |         |         |          |   |         |         |          |   |         |         |          |   |          |          |         |   |          |         |         |   |          |         |         |   |          |          |          |   |          |          |          |
| C                                              | 2.09506                                                                                                                                                                                                                                                                                                                                                                                                                                                                                                                                                                                                                                                                                                                                                                                                                                                                                                                                                                                                                                                                                                                                                                                                                                                                                                                                                                                                                                                                                                                                                                                                                                                                                                                                                                                                                                                                                                                                                   | -0.45830 | -0.18158 |   |          |          |          |   |         |          |         |   |         |          |         |   |         |         |         |   |         |         |          |   |         |         |          |   |         |         |          |   |         |          |          |   |         |          |          |   |          |         |          |   |         |         |          |   |          |          |          |   |         |          |         |   |         |          |         |   |         |          |         |   |         |         |         |   |         |          |         |   |         |         |          |   |         |         |          |   |         |         |          |   |         |         |          |   |          |          |         |   |          |         |         |   |          |         |         |   |          |          |          |   |          |          |          |
| N                                              | 0.81786                                                                                                                                                                                                                                                                                                                                                                                                                                                                                                                                                                                                                                                                                                                                                                                                                                                                                                                                                                                                                                                                                                                                                                                                                                                                                                                                                                                                                                                                                                                                                                                                                                                                                                                                                                                                                                                                                                                                                   | -0.30053 | -0.52640 |   |          |          |          |   |         |          |         |   |         |          |         |   |         |         |         |   |         |         |          |   |         |         |          |   |         |         |          |   |         |          |          |   |         |          |          |   |          |         |          |   |         |         |          |   |          |          |          |   |         |          |         |   |         |          |         |   |         |          |         |   |         |         |         |   |         |          |         |   |         |         |          |   |         |         |          |   |         |         |          |   |         |         |          |   |          |          |         |   |          |         |         |   |          |         |         |   |          |          |          |   |          |          |          |
| H                                              | -0.19652                                                                                                                                                                                                                                                                                                                                                                                                                                                                                                                                                                                                                                                                                                                                                                                                                                                                                                                                                                                                                                                                                                                                                                                                                                                                                                                                                                                                                                                                                                                                                                                                                                                                                                                                                                                                                                                                                                                                                  | 1.41290  | -1.34927 |   |          |          |          |   |         |          |         |   |         |          |         |   |         |         |         |   |         |         |          |   |         |         |          |   |         |         |          |   |         |          |          |   |         |          |          |   |          |         |          |   |         |         |          |   |          |          |          |   |         |          |         |   |         |          |         |   |         |          |         |   |         |         |         |   |         |          |         |   |         |         |          |   |         |         |          |   |         |         |          |   |         |         |          |   |          |          |         |   |          |         |         |   |          |         |         |   |          |          |          |   |          |          |          |
| H                                              | 3.88147                                                                                                                                                                                                                                                                                                                                                                                                                                                                                                                                                                                                                                                                                                                                                                                                                                                                                                                                                                                                                                                                                                                                                                                                                                                                                                                                                                                                                                                                                                                                                                                                                                                                                                                                                                                                                                                                                                                                                   | 0.73788  | -0.18949 |   |          |          |          |   |         |          |         |   |         |          |         |   |         |         |         |   |         |         |          |   |         |         |          |   |         |         |          |   |         |          |          |   |         |          |          |   |          |         |          |   |         |         |          |   |          |          |          |   |         |          |         |   |         |          |         |   |         |          |         |   |         |         |         |   |         |          |         |   |         |         |          |   |         |         |          |   |         |         |          |   |         |         |          |   |          |          |         |   |          |         |         |   |          |         |         |   |          |          |          |   |          |          |          |
| H                                              | -0.48850                                                                                                                                                                                                                                                                                                                                                                                                                                                                                                                                                                                                                                                                                                                                                                                                                                                                                                                                                                                                                                                                                                                                                                                                                                                                                                                                                                                                                                                                                                                                                                                                                                                                                                                                                                                                                                                                                                                                                  | -1.51865 | -0.61047 |   |          |          |          |   |         |          |         |   |         |          |         |   |         |         |         |   |         |         |          |   |         |         |          |   |         |         |          |   |         |          |          |   |         |          |          |   |          |         |          |   |         |         |          |   |          |          |          |   |         |          |         |   |         |          |         |   |         |          |         |   |         |         |         |   |         |          |         |   |         |         |          |   |         |         |          |   |         |         |          |   |         |         |          |   |          |          |         |   |          |         |         |   |          |         |         |   |          |          |          |   |          |          |          |
| H                                              | 2.55678                                                                                                                                                                                                                                                                                                                                                                                                                                                                                                                                                                                                                                                                                                                                                                                                                                                                                                                                                                                                                                                                                                                                                                                                                                                                                                                                                                                                                                                                                                                                                                                                                                                                                                                                                                                                                                                                                                                                                   | -1.34571 | 0.22785  |   |          |          |          |   |         |          |         |   |         |          |         |   |         |         |         |   |         |         |          |   |         |         |          |   |         |         |          |   |         |          |          |   |         |          |          |   |          |         |          |   |         |         |          |   |          |          |          |   |         |          |         |   |         |          |         |   |         |          |         |   |         |         |         |   |         |          |         |   |         |         |          |   |         |         |          |   |         |         |          |   |         |         |          |   |          |          |         |   |          |         |         |   |          |         |         |   |          |          |          |   |          |          |          |
| C                                              | 7.24257                                                                                                                                                                                                                                                                                                                                                                                                                                                                                                                                                                                                                                                                                                                                                                                                                                                                                                                                                                                                                                                                                                                                                                                                                                                                                                                                                                                                                                                                                                                                                                                                                                                                                                                                                                                                                                                                                                                                                   | -0.45678 | 0.97513  |   |          |          |          |   |         |          |         |   |         |          |         |   |         |         |         |   |         |         |          |   |         |         |          |   |         |         |          |   |         |          |          |   |         |          |          |   |          |         |          |   |         |         |          |   |          |          |          |   |         |          |         |   |         |          |         |   |         |          |         |   |         |         |         |   |         |          |         |   |         |         |          |   |         |         |          |   |         |         |          |   |         |         |          |   |          |          |         |   |          |         |         |   |          |         |         |   |          |          |          |   |          |          |          |
| H                                              | 7.86844                                                                                                                                                                                                                                                                                                                                                                                                                                                                                                                                                                                                                                                                                                                                                                                                                                                                                                                                                                                                                                                                                                                                                                                                                                                                                                                                                                                                                                                                                                                                                                                                                                                                                                                                                                                                                                                                                                                                                   | -0.24920 | 0.09787  |   |          |          |          |   |         |          |         |   |         |          |         |   |         |         |         |   |         |         |          |   |         |         |          |   |         |         |          |   |         |          |          |   |         |          |          |   |          |         |          |   |         |         |          |   |          |          |          |   |         |          |         |   |         |          |         |   |         |          |         |   |         |         |         |   |         |          |         |   |         |         |          |   |         |         |          |   |         |         |          |   |         |         |          |   |          |          |         |   |          |         |         |   |          |         |         |   |          |          |          |   |          |          |          |
| H                                              | 7.49762                                                                                                                                                                                                                                                                                                                                                                                                                                                                                                                                                                                                                                                                                                                                                                                                                                                                                                                                                                                                                                                                                                                                                                                                                                                                                                                                                                                                                                                                                                                                                                                                                                                                                                                                                                                                                                                                                                                                                   | 0.29639  | 1.73154  |   |          |          |          |   |         |          |         |   |         |          |         |   |         |         |         |   |         |         |          |   |         |         |          |   |         |         |          |   |         |          |          |   |         |          |          |   |          |         |          |   |         |         |          |   |          |          |          |   |         |          |         |   |         |          |         |   |         |          |         |   |         |         |         |   |         |          |         |   |         |         |          |   |         |         |          |   |         |         |          |   |         |         |          |   |          |          |         |   |          |         |         |   |          |         |         |   |          |          |          |   |          |          |          |
| H                                              | 7.47489                                                                                                                                                                                                                                                                                                                                                                                                                                                                                                                                                                                                                                                                                                                                                                                                                                                                                                                                                                                                                                                                                                                                                                                                                                                                                                                                                                                                                                                                                                                                                                                                                                                                                                                                                                                                                                                                                                                                                   | -1.45382 | 1.36134  |   |          |          |          |   |         |          |         |   |         |          |         |   |         |         |         |   |         |         |          |   |         |         |          |   |         |         |          |   |         |          |          |   |         |          |          |   |          |         |          |   |         |         |          |   |          |          |          |   |         |          |         |   |         |          |         |   |         |          |         |   |         |         |         |   |         |          |         |   |         |         |          |   |         |         |          |   |         |         |          |   |         |         |          |   |          |          |         |   |          |         |         |   |          |         |         |   |          |          |          |   |          |          |          |
| C                                              | 2.42351                                                                                                                                                                                                                                                                                                                                                                                                                                                                                                                                                                                                                                                                                                                                                                                                                                                                                                                                                                                                                                                                                                                                                                                                                                                                                                                                                                                                                                                                                                                                                                                                                                                                                                                                                                                                                                                                                                                                                   | 2.98158  | -1.29191 |   |          |          |          |   |         |          |         |   |         |          |         |   |         |         |         |   |         |         |          |   |         |         |          |   |         |         |          |   |         |          |          |   |         |          |          |   |          |         |          |   |         |         |          |   |          |          |          |   |         |          |         |   |         |          |         |   |         |          |         |   |         |         |         |   |         |          |         |   |         |         |          |   |         |         |          |   |         |         |          |   |         |         |          |   |          |          |         |   |          |         |         |   |          |         |         |   |          |          |          |   |          |          |          |
| H                                              | 2.82799                                                                                                                                                                                                                                                                                                                                                                                                                                                                                                                                                                                                                                                                                                                                                                                                                                                                                                                                                                                                                                                                                                                                                                                                                                                                                                                                                                                                                                                                                                                                                                                                                                                                                                                                                                                                                                                                                                                                                   | 3.52634  | -0.42863 |   |          |          |          |   |         |          |         |   |         |          |         |   |         |         |         |   |         |         |          |   |         |         |          |   |         |         |          |   |         |          |          |   |         |          |          |   |          |         |          |   |         |         |          |   |          |          |          |   |         |          |         |   |         |          |         |   |         |          |         |   |         |         |         |   |         |          |         |   |         |         |          |   |         |         |          |   |         |         |          |   |         |         |          |   |          |          |         |   |          |         |         |   |          |         |         |   |          |          |          |   |          |          |          |
| H                                              | 3.21400                                                                                                                                                                                                                                                                                                                                                                                                                                                                                                                                                                                                                                                                                                                                                                                                                                                                                                                                                                                                                                                                                                                                                                                                                                                                                                                                                                                                                                                                                                                                                                                                                                                                                                                                                                                                                                                                                                                                                   | 2.96206  | -2.05368 |   |          |          |          |   |         |          |         |   |         |          |         |   |         |         |         |   |         |         |          |   |         |         |          |   |         |         |          |   |         |          |          |   |         |          |          |   |          |         |          |   |         |         |          |   |          |          |          |   |         |          |         |   |         |          |         |   |         |          |         |   |         |         |         |   |         |          |         |   |         |         |          |   |         |         |          |   |         |         |          |   |         |         |          |   |          |          |         |   |          |         |         |   |          |         |         |   |          |          |          |   |          |          |          |
| H                                              | 1.58386                                                                                                                                                                                                                                                                                                                                                                                                                                                                                                                                                                                                                                                                                                                                                                                                                                                                                                                                                                                                                                                                                                                                                                                                                                                                                                                                                                                                                                                                                                                                                                                                                                                                                                                                                                                                                                                                                                                                                   | 3.56059  | -1.69197 |   |          |          |          |   |         |          |         |   |         |          |         |   |         |         |         |   |         |         |          |   |         |         |          |   |         |         |          |   |         |          |          |   |         |          |          |   |          |         |          |   |         |         |          |   |          |          |          |   |         |          |         |   |         |          |         |   |         |          |         |   |         |         |         |   |         |          |         |   |         |         |          |   |         |         |          |   |         |         |          |   |         |         |          |   |          |          |         |   |          |         |         |   |          |         |         |   |          |          |          |   |          |          |          |
| C                                              | -3.00545                                                                                                                                                                                                                                                                                                                                                                                                                                                                                                                                                                                                                                                                                                                                                                                                                                                                                                                                                                                                                                                                                                                                                                                                                                                                                                                                                                                                                                                                                                                                                                                                                                                                                                                                                                                                                                                                                                                                                  | -0.35260 | 1.25552  |   |          |          |          |   |         |          |         |   |         |          |         |   |         |         |         |   |         |         |          |   |         |         |          |   |         |         |          |   |         |          |          |   |         |          |          |   |          |         |          |   |         |         |          |   |          |          |          |   |         |          |         |   |         |          |         |   |         |          |         |   |         |         |         |   |         |          |         |   |         |         |          |   |         |         |          |   |         |         |          |   |         |         |          |   |          |          |         |   |          |         |         |   |          |         |         |   |          |          |          |   |          |          |          |
| C                                              | -5.28292                                                                                                                                                                                                                                                                                                                                                                                                                                                                                                                                                                                                                                                                                                                                                                                                                                                                                                                                                                                                                                                                                                                                                                                                                                                                                                                                                                                                                                                                                                                                                                                                                                                                                                                                                                                                                                                                                                                                                  | 0.56864  | 0.79991  |   |          |          |          |   |         |          |         |   |         |          |         |   |         |         |         |   |         |         |          |   |         |         |          |   |         |         |          |   |         |          |          |   |         |          |          |   |          |         |          |   |         |         |          |   |          |          |          |   |         |          |         |   |         |          |         |   |         |          |         |   |         |         |         |   |         |          |         |   |         |         |          |   |         |         |          |   |         |         |          |   |         |         |          |   |          |          |         |   |          |         |         |   |          |         |         |   |          |          |          |   |          |          |          |
| O                                              | -6.27205                                                                                                                                                                                                                                                                                                                                                                                                                                                                                                                                                                                                                                                                                                                                                                                                                                                                                                                                                                                                                                                                                                                                                                                                                                                                                                                                                                                                                                                                                                                                                                                                                                                                                                                                                                                                                                                                                                                                                  | 1.18286  | 1.16541  |   |          |          |          |   |         |          |         |   |         |          |         |   |         |         |         |   |         |         |          |   |         |         |          |   |         |         |          |   |         |          |          |   |         |          |          |   |          |         |          |   |         |         |          |   |          |          |          |   |         |          |         |   |         |          |         |   |         |          |         |   |         |         |         |   |         |          |         |   |         |         |          |   |         |         |          |   |         |         |          |   |         |         |          |   |          |          |         |   |          |         |         |   |          |         |         |   |          |          |          |   |          |          |          |
| C                                              | -1.16356                                                                                                                                                                                                                                                                                                                                                                                                                                                                                                                                                                                                                                                                                                                                                                                                                                                                                                                                                                                                                                                                                                                                                                                                                                                                                                                                                                                                                                                                                                                                                                                                                                                                                                                                                                                                                                                                                                                                                  | -2.68494 | -2.02191 |   |          |          |          |   |         |          |         |   |         |          |         |   |         |         |         |   |         |         |          |   |         |         |          |   |         |         |          |   |         |          |          |   |         |          |          |   |          |         |          |   |         |         |          |   |          |          |          |   |         |          |         |   |         |          |         |   |         |          |         |   |         |         |         |   |         |          |         |   |         |         |          |   |         |         |          |   |         |         |          |   |         |         |          |   |          |          |         |   |          |         |         |   |          |         |         |   |          |          |          |   |          |          |          |
| H                                              | -1.99313                                                                                                                                                                                                                                                                                                                                                                                                                                                                                                                                                                                                                                                                                                                                                                                                                                                                                                                                                                                                                                                                                                                                                                                                                                                                                                                                                                                                                                                                                                                                                                                                                                                                                                                                                                                                                                                                                                                                                  | -3.39060 | -2.16037 |   |          |          |          |   |         |          |         |   |         |          |         |   |         |         |         |   |         |         |          |   |         |         |          |   |         |         |          |   |         |          |          |   |         |          |          |   |          |         |          |   |         |         |          |   |          |          |          |   |         |          |         |   |         |          |         |   |         |          |         |   |         |         |         |   |         |          |         |   |         |         |          |   |         |         |          |   |         |         |          |   |         |         |          |   |          |          |         |   |          |         |         |   |          |         |         |   |          |          |          |   |          |          |          |

|   |          |          |          |
|---|----------|----------|----------|
| H | -1.24911 | -1.91170 | -2.80601 |
| H | -0.22373 | -3.23405 | -2.20571 |
| C | -4.09683 | 0.33153  | 1.63661  |
| H | -4.17471 | 0.76946  | 2.62907  |
| O | -5.18301 | 0.03110  | -0.44709 |
| C | -6.31481 | 0.24275  | -1.29060 |
| H | -6.07050 | -0.24167 | -2.23767 |
| H | -6.49485 | 1.31138  | -1.44480 |
| H | -7.21644 | -0.20150 | -0.85682 |
| C | -1.80576 | -0.58747 | 2.11348  |
| H | -2.94676 | -0.78700 | 0.25915  |
| H | -1.62523 | -1.66568 | 2.21145  |
| H | -0.90833 | -0.18781 | 1.62331  |
| H | -1.90717 | -0.14364 | 3.10988  |

Optimized Molecular Properties for **T1-TS1**

|                                                |                                                                                                                                                                                                                                                                                                                                                                                                                                                                                                                                                                                                                                                                                                                                                                                                                                                                                                                                                                                                                                                                                                                                                                                                                                                                                                                                                                                                                                                                                                                                                                                                                                                                                                                                                                                                                                                                                                                                                                                                                                           |          |          |   |          |          |          |   |         |          |          |   |         |          |          |   |         |         |          |   |         |         |          |   |         |         |          |   |         |         |          |   |         |          |          |   |         |          |          |   |          |         |          |   |         |         |          |   |          |          |          |   |         |          |          |   |         |          |          |   |         |          |          |   |         |          |         |   |         |          |          |   |         |         |         |   |         |         |         |   |         |         |          |   |         |         |         |   |          |          |         |   |          |         |         |   |          |         |         |   |          |          |          |   |          |          |          |   |          |          |          |
|------------------------------------------------|-------------------------------------------------------------------------------------------------------------------------------------------------------------------------------------------------------------------------------------------------------------------------------------------------------------------------------------------------------------------------------------------------------------------------------------------------------------------------------------------------------------------------------------------------------------------------------------------------------------------------------------------------------------------------------------------------------------------------------------------------------------------------------------------------------------------------------------------------------------------------------------------------------------------------------------------------------------------------------------------------------------------------------------------------------------------------------------------------------------------------------------------------------------------------------------------------------------------------------------------------------------------------------------------------------------------------------------------------------------------------------------------------------------------------------------------------------------------------------------------------------------------------------------------------------------------------------------------------------------------------------------------------------------------------------------------------------------------------------------------------------------------------------------------------------------------------------------------------------------------------------------------------------------------------------------------------------------------------------------------------------------------------------------------|----------|----------|---|----------|----------|----------|---|---------|----------|----------|---|---------|----------|----------|---|---------|---------|----------|---|---------|---------|----------|---|---------|---------|----------|---|---------|---------|----------|---|---------|----------|----------|---|---------|----------|----------|---|----------|---------|----------|---|---------|---------|----------|---|----------|----------|----------|---|---------|----------|----------|---|---------|----------|----------|---|---------|----------|----------|---|---------|----------|---------|---|---------|----------|----------|---|---------|---------|---------|---|---------|---------|---------|---|---------|---------|----------|---|---------|---------|---------|---|----------|----------|---------|---|----------|---------|---------|---|----------|---------|---------|---|----------|----------|----------|---|----------|----------|----------|---|----------|----------|----------|
| Number of<br>(-)<br>Vibrational<br>Frequencies | 1 (-181.3747)                                                                                                                                                                                                                                                                                                                                                                                                                                                                                                                                                                                                                                                                                                                                                                                                                                                                                                                                                                                                                                                                                                                                                                                                                                                                                                                                                                                                                                                                                                                                                                                                                                                                                                                                                                                                                                                                                                                                                                                                                             |          |          |   |          |          |          |   |         |          |          |   |         |          |          |   |         |         |          |   |         |         |          |   |         |         |          |   |         |         |          |   |         |          |          |   |         |          |          |   |          |         |          |   |         |         |          |   |          |          |          |   |         |          |          |   |         |          |          |   |         |          |          |   |         |          |         |   |         |          |          |   |         |         |         |   |         |         |         |   |         |         |          |   |         |         |         |   |          |          |         |   |          |         |         |   |          |         |         |   |          |          |          |   |          |          |          |   |          |          |          |
| Absolute<br>Energies<br>(Hartrees)             | <p><b>B3LYP/6-31G(d)</b></p> <p>There are 11 positive frequencies below 100 cm<sup>-1</sup>.</p> <p>Zero-point correction: 0.325894 hartree<br/>           Enthalpy correction: 0.350820 hartree<br/>           Free Energy correction: 0.265803 hartree<br/>           Quasiharmonic Free Energy correction: 0.274938 hartree</p> <p>SCF Energy: -955.596970 hartree<br/>           SCF Energy + ZPVE: -955.271076 hartree<br/>           Enthalpy: -955.246150 hartree<br/>           Free Energy: -955.331167 hartree</p> <p>Free Energy with quasiharmonic correction: -955.322032 hartree<br/>           (correction: 5.73 kcal/mol)</p> <p><b>B3LYP-D3/6-311+G(d,p)</b></p> <p>SCF Done: E(RB3LYP) = -955.946816531 A.U.</p>                                                                                                                                                                                                                                                                                                                                                                                                                                                                                                                                                                                                                                                                                                                                                                                                                                                                                                                                                                                                                                                                                                                                                                                                                                                                                                        |          |          |   |          |          |          |   |         |          |          |   |         |          |          |   |         |         |          |   |         |         |          |   |         |         |          |   |         |         |          |   |         |          |          |   |         |          |          |   |          |         |          |   |         |         |          |   |          |          |          |   |         |          |          |   |         |          |          |   |         |          |          |   |         |          |         |   |         |          |          |   |         |         |         |   |         |         |         |   |         |         |          |   |         |         |         |   |          |          |         |   |          |         |         |   |          |         |         |   |          |          |          |   |          |          |          |   |          |          |          |
| Cartesian<br>Coordinates                       | <p>40<br/>           spD3-TS1-T1.out Energy: -599865.6792336</p> <table> <tr><td>O</td><td>-1.51501</td><td>-1.51814</td><td>-0.30408</td></tr> <tr><td>C</td><td>5.68118</td><td>-0.78608</td><td>-0.09746</td></tr> <tr><td>O</td><td>4.91990</td><td>-1.74054</td><td>-0.15188</td></tr> <tr><td>O</td><td>5.31998</td><td>0.48662</td><td>-0.05235</td></tr> <tr><td>C</td><td>1.83928</td><td>1.82667</td><td>-0.05323</td></tr> <tr><td>C</td><td>0.54262</td><td>1.36690</td><td>-0.08733</td></tr> <tr><td>N</td><td>2.69087</td><td>0.73940</td><td>-0.08756</td></tr> <tr><td>C</td><td>1.90755</td><td>-0.33555</td><td>-0.14113</td></tr> <tr><td>N</td><td>0.60176</td><td>-0.00643</td><td>-0.14268</td></tr> <tr><td>H</td><td>-0.40469</td><td>1.88711</td><td>-0.07855</td></tr> <tr><td>H</td><td>4.27774</td><td>0.57799</td><td>-0.06760</td></tr> <tr><td>H</td><td>-0.27174</td><td>-0.67083</td><td>-0.18381</td></tr> <tr><td>H</td><td>2.28121</td><td>-1.34907</td><td>-0.17786</td></tr> <tr><td>C</td><td>7.19494</td><td>-0.94457</td><td>-0.07322</td></tr> <tr><td>H</td><td>7.64093</td><td>-0.41504</td><td>-0.92250</td></tr> <tr><td>H</td><td>7.60390</td><td>-0.49482</td><td>0.83846</td></tr> <tr><td>H</td><td>7.46016</td><td>-2.00256</td><td>-0.11524</td></tr> <tr><td>C</td><td>2.34794</td><td>3.23354</td><td>0.00906</td></tr> <tr><td>H</td><td>2.95594</td><td>3.40589</td><td>0.90716</td></tr> <tr><td>H</td><td>2.98000</td><td>3.47466</td><td>-0.85600</td></tr> <tr><td>H</td><td>1.51558</td><td>3.94529</td><td>0.02550</td></tr> <tr><td>C</td><td>-2.78246</td><td>-0.97471</td><td>1.05189</td></tr> <tr><td>C</td><td>-4.55293</td><td>0.57940</td><td>0.18376</td></tr> <tr><td>O</td><td>-5.07503</td><td>1.68413</td><td>0.02507</td></tr> <tr><td>C</td><td>-2.03313</td><td>-1.28874</td><td>-1.57392</td></tr> <tr><td>H</td><td>-2.64304</td><td>-2.13800</td><td>-1.93920</td></tr> <tr><td>H</td><td>-2.67869</td><td>-0.38969</td><td>-1.60448</td></tr> </table> |          |          | O | -1.51501 | -1.51814 | -0.30408 | C | 5.68118 | -0.78608 | -0.09746 | O | 4.91990 | -1.74054 | -0.15188 | O | 5.31998 | 0.48662 | -0.05235 | C | 1.83928 | 1.82667 | -0.05323 | C | 0.54262 | 1.36690 | -0.08733 | N | 2.69087 | 0.73940 | -0.08756 | C | 1.90755 | -0.33555 | -0.14113 | N | 0.60176 | -0.00643 | -0.14268 | H | -0.40469 | 1.88711 | -0.07855 | H | 4.27774 | 0.57799 | -0.06760 | H | -0.27174 | -0.67083 | -0.18381 | H | 2.28121 | -1.34907 | -0.17786 | C | 7.19494 | -0.94457 | -0.07322 | H | 7.64093 | -0.41504 | -0.92250 | H | 7.60390 | -0.49482 | 0.83846 | H | 7.46016 | -2.00256 | -0.11524 | C | 2.34794 | 3.23354 | 0.00906 | H | 2.95594 | 3.40589 | 0.90716 | H | 2.98000 | 3.47466 | -0.85600 | H | 1.51558 | 3.94529 | 0.02550 | C | -2.78246 | -0.97471 | 1.05189 | C | -4.55293 | 0.57940 | 0.18376 | O | -5.07503 | 1.68413 | 0.02507 | C | -2.03313 | -1.28874 | -1.57392 | H | -2.64304 | -2.13800 | -1.93920 | H | -2.67869 | -0.38969 | -1.60448 |
| O                                              | -1.51501                                                                                                                                                                                                                                                                                                                                                                                                                                                                                                                                                                                                                                                                                                                                                                                                                                                                                                                                                                                                                                                                                                                                                                                                                                                                                                                                                                                                                                                                                                                                                                                                                                                                                                                                                                                                                                                                                                                                                                                                                                  | -1.51814 | -0.30408 |   |          |          |          |   |         |          |          |   |         |          |          |   |         |         |          |   |         |         |          |   |         |         |          |   |         |         |          |   |         |          |          |   |         |          |          |   |          |         |          |   |         |         |          |   |          |          |          |   |         |          |          |   |         |          |          |   |         |          |          |   |         |          |         |   |         |          |          |   |         |         |         |   |         |         |         |   |         |         |          |   |         |         |         |   |          |          |         |   |          |         |         |   |          |         |         |   |          |          |          |   |          |          |          |   |          |          |          |
| C                                              | 5.68118                                                                                                                                                                                                                                                                                                                                                                                                                                                                                                                                                                                                                                                                                                                                                                                                                                                                                                                                                                                                                                                                                                                                                                                                                                                                                                                                                                                                                                                                                                                                                                                                                                                                                                                                                                                                                                                                                                                                                                                                                                   | -0.78608 | -0.09746 |   |          |          |          |   |         |          |          |   |         |          |          |   |         |         |          |   |         |         |          |   |         |         |          |   |         |         |          |   |         |          |          |   |         |          |          |   |          |         |          |   |         |         |          |   |          |          |          |   |         |          |          |   |         |          |          |   |         |          |          |   |         |          |         |   |         |          |          |   |         |         |         |   |         |         |         |   |         |         |          |   |         |         |         |   |          |          |         |   |          |         |         |   |          |         |         |   |          |          |          |   |          |          |          |   |          |          |          |
| O                                              | 4.91990                                                                                                                                                                                                                                                                                                                                                                                                                                                                                                                                                                                                                                                                                                                                                                                                                                                                                                                                                                                                                                                                                                                                                                                                                                                                                                                                                                                                                                                                                                                                                                                                                                                                                                                                                                                                                                                                                                                                                                                                                                   | -1.74054 | -0.15188 |   |          |          |          |   |         |          |          |   |         |          |          |   |         |         |          |   |         |         |          |   |         |         |          |   |         |         |          |   |         |          |          |   |         |          |          |   |          |         |          |   |         |         |          |   |          |          |          |   |         |          |          |   |         |          |          |   |         |          |          |   |         |          |         |   |         |          |          |   |         |         |         |   |         |         |         |   |         |         |          |   |         |         |         |   |          |          |         |   |          |         |         |   |          |         |         |   |          |          |          |   |          |          |          |   |          |          |          |
| O                                              | 5.31998                                                                                                                                                                                                                                                                                                                                                                                                                                                                                                                                                                                                                                                                                                                                                                                                                                                                                                                                                                                                                                                                                                                                                                                                                                                                                                                                                                                                                                                                                                                                                                                                                                                                                                                                                                                                                                                                                                                                                                                                                                   | 0.48662  | -0.05235 |   |          |          |          |   |         |          |          |   |         |          |          |   |         |         |          |   |         |         |          |   |         |         |          |   |         |         |          |   |         |          |          |   |         |          |          |   |          |         |          |   |         |         |          |   |          |          |          |   |         |          |          |   |         |          |          |   |         |          |          |   |         |          |         |   |         |          |          |   |         |         |         |   |         |         |         |   |         |         |          |   |         |         |         |   |          |          |         |   |          |         |         |   |          |         |         |   |          |          |          |   |          |          |          |   |          |          |          |
| C                                              | 1.83928                                                                                                                                                                                                                                                                                                                                                                                                                                                                                                                                                                                                                                                                                                                                                                                                                                                                                                                                                                                                                                                                                                                                                                                                                                                                                                                                                                                                                                                                                                                                                                                                                                                                                                                                                                                                                                                                                                                                                                                                                                   | 1.82667  | -0.05323 |   |          |          |          |   |         |          |          |   |         |          |          |   |         |         |          |   |         |         |          |   |         |         |          |   |         |         |          |   |         |          |          |   |         |          |          |   |          |         |          |   |         |         |          |   |          |          |          |   |         |          |          |   |         |          |          |   |         |          |          |   |         |          |         |   |         |          |          |   |         |         |         |   |         |         |         |   |         |         |          |   |         |         |         |   |          |          |         |   |          |         |         |   |          |         |         |   |          |          |          |   |          |          |          |   |          |          |          |
| C                                              | 0.54262                                                                                                                                                                                                                                                                                                                                                                                                                                                                                                                                                                                                                                                                                                                                                                                                                                                                                                                                                                                                                                                                                                                                                                                                                                                                                                                                                                                                                                                                                                                                                                                                                                                                                                                                                                                                                                                                                                                                                                                                                                   | 1.36690  | -0.08733 |   |          |          |          |   |         |          |          |   |         |          |          |   |         |         |          |   |         |         |          |   |         |         |          |   |         |         |          |   |         |          |          |   |         |          |          |   |          |         |          |   |         |         |          |   |          |          |          |   |         |          |          |   |         |          |          |   |         |          |          |   |         |          |         |   |         |          |          |   |         |         |         |   |         |         |         |   |         |         |          |   |         |         |         |   |          |          |         |   |          |         |         |   |          |         |         |   |          |          |          |   |          |          |          |   |          |          |          |
| N                                              | 2.69087                                                                                                                                                                                                                                                                                                                                                                                                                                                                                                                                                                                                                                                                                                                                                                                                                                                                                                                                                                                                                                                                                                                                                                                                                                                                                                                                                                                                                                                                                                                                                                                                                                                                                                                                                                                                                                                                                                                                                                                                                                   | 0.73940  | -0.08756 |   |          |          |          |   |         |          |          |   |         |          |          |   |         |         |          |   |         |         |          |   |         |         |          |   |         |         |          |   |         |          |          |   |         |          |          |   |          |         |          |   |         |         |          |   |          |          |          |   |         |          |          |   |         |          |          |   |         |          |          |   |         |          |         |   |         |          |          |   |         |         |         |   |         |         |         |   |         |         |          |   |         |         |         |   |          |          |         |   |          |         |         |   |          |         |         |   |          |          |          |   |          |          |          |   |          |          |          |
| C                                              | 1.90755                                                                                                                                                                                                                                                                                                                                                                                                                                                                                                                                                                                                                                                                                                                                                                                                                                                                                                                                                                                                                                                                                                                                                                                                                                                                                                                                                                                                                                                                                                                                                                                                                                                                                                                                                                                                                                                                                                                                                                                                                                   | -0.33555 | -0.14113 |   |          |          |          |   |         |          |          |   |         |          |          |   |         |         |          |   |         |         |          |   |         |         |          |   |         |         |          |   |         |          |          |   |         |          |          |   |          |         |          |   |         |         |          |   |          |          |          |   |         |          |          |   |         |          |          |   |         |          |          |   |         |          |         |   |         |          |          |   |         |         |         |   |         |         |         |   |         |         |          |   |         |         |         |   |          |          |         |   |          |         |         |   |          |         |         |   |          |          |          |   |          |          |          |   |          |          |          |
| N                                              | 0.60176                                                                                                                                                                                                                                                                                                                                                                                                                                                                                                                                                                                                                                                                                                                                                                                                                                                                                                                                                                                                                                                                                                                                                                                                                                                                                                                                                                                                                                                                                                                                                                                                                                                                                                                                                                                                                                                                                                                                                                                                                                   | -0.00643 | -0.14268 |   |          |          |          |   |         |          |          |   |         |          |          |   |         |         |          |   |         |         |          |   |         |         |          |   |         |         |          |   |         |          |          |   |         |          |          |   |          |         |          |   |         |         |          |   |          |          |          |   |         |          |          |   |         |          |          |   |         |          |          |   |         |          |         |   |         |          |          |   |         |         |         |   |         |         |         |   |         |         |          |   |         |         |         |   |          |          |         |   |          |         |         |   |          |         |         |   |          |          |          |   |          |          |          |   |          |          |          |
| H                                              | -0.40469                                                                                                                                                                                                                                                                                                                                                                                                                                                                                                                                                                                                                                                                                                                                                                                                                                                                                                                                                                                                                                                                                                                                                                                                                                                                                                                                                                                                                                                                                                                                                                                                                                                                                                                                                                                                                                                                                                                                                                                                                                  | 1.88711  | -0.07855 |   |          |          |          |   |         |          |          |   |         |          |          |   |         |         |          |   |         |         |          |   |         |         |          |   |         |         |          |   |         |          |          |   |         |          |          |   |          |         |          |   |         |         |          |   |          |          |          |   |         |          |          |   |         |          |          |   |         |          |          |   |         |          |         |   |         |          |          |   |         |         |         |   |         |         |         |   |         |         |          |   |         |         |         |   |          |          |         |   |          |         |         |   |          |         |         |   |          |          |          |   |          |          |          |   |          |          |          |
| H                                              | 4.27774                                                                                                                                                                                                                                                                                                                                                                                                                                                                                                                                                                                                                                                                                                                                                                                                                                                                                                                                                                                                                                                                                                                                                                                                                                                                                                                                                                                                                                                                                                                                                                                                                                                                                                                                                                                                                                                                                                                                                                                                                                   | 0.57799  | -0.06760 |   |          |          |          |   |         |          |          |   |         |          |          |   |         |         |          |   |         |         |          |   |         |         |          |   |         |         |          |   |         |          |          |   |         |          |          |   |          |         |          |   |         |         |          |   |          |          |          |   |         |          |          |   |         |          |          |   |         |          |          |   |         |          |         |   |         |          |          |   |         |         |         |   |         |         |         |   |         |         |          |   |         |         |         |   |          |          |         |   |          |         |         |   |          |         |         |   |          |          |          |   |          |          |          |   |          |          |          |
| H                                              | -0.27174                                                                                                                                                                                                                                                                                                                                                                                                                                                                                                                                                                                                                                                                                                                                                                                                                                                                                                                                                                                                                                                                                                                                                                                                                                                                                                                                                                                                                                                                                                                                                                                                                                                                                                                                                                                                                                                                                                                                                                                                                                  | -0.67083 | -0.18381 |   |          |          |          |   |         |          |          |   |         |          |          |   |         |         |          |   |         |         |          |   |         |         |          |   |         |         |          |   |         |          |          |   |         |          |          |   |          |         |          |   |         |         |          |   |          |          |          |   |         |          |          |   |         |          |          |   |         |          |          |   |         |          |         |   |         |          |          |   |         |         |         |   |         |         |         |   |         |         |          |   |         |         |         |   |          |          |         |   |          |         |         |   |          |         |         |   |          |          |          |   |          |          |          |   |          |          |          |
| H                                              | 2.28121                                                                                                                                                                                                                                                                                                                                                                                                                                                                                                                                                                                                                                                                                                                                                                                                                                                                                                                                                                                                                                                                                                                                                                                                                                                                                                                                                                                                                                                                                                                                                                                                                                                                                                                                                                                                                                                                                                                                                                                                                                   | -1.34907 | -0.17786 |   |          |          |          |   |         |          |          |   |         |          |          |   |         |         |          |   |         |         |          |   |         |         |          |   |         |         |          |   |         |          |          |   |         |          |          |   |          |         |          |   |         |         |          |   |          |          |          |   |         |          |          |   |         |          |          |   |         |          |          |   |         |          |         |   |         |          |          |   |         |         |         |   |         |         |         |   |         |         |          |   |         |         |         |   |          |          |         |   |          |         |         |   |          |         |         |   |          |          |          |   |          |          |          |   |          |          |          |
| C                                              | 7.19494                                                                                                                                                                                                                                                                                                                                                                                                                                                                                                                                                                                                                                                                                                                                                                                                                                                                                                                                                                                                                                                                                                                                                                                                                                                                                                                                                                                                                                                                                                                                                                                                                                                                                                                                                                                                                                                                                                                                                                                                                                   | -0.94457 | -0.07322 |   |          |          |          |   |         |          |          |   |         |          |          |   |         |         |          |   |         |         |          |   |         |         |          |   |         |         |          |   |         |          |          |   |         |          |          |   |          |         |          |   |         |         |          |   |          |          |          |   |         |          |          |   |         |          |          |   |         |          |          |   |         |          |         |   |         |          |          |   |         |         |         |   |         |         |         |   |         |         |          |   |         |         |         |   |          |          |         |   |          |         |         |   |          |         |         |   |          |          |          |   |          |          |          |   |          |          |          |
| H                                              | 7.64093                                                                                                                                                                                                                                                                                                                                                                                                                                                                                                                                                                                                                                                                                                                                                                                                                                                                                                                                                                                                                                                                                                                                                                                                                                                                                                                                                                                                                                                                                                                                                                                                                                                                                                                                                                                                                                                                                                                                                                                                                                   | -0.41504 | -0.92250 |   |          |          |          |   |         |          |          |   |         |          |          |   |         |         |          |   |         |         |          |   |         |         |          |   |         |         |          |   |         |          |          |   |         |          |          |   |          |         |          |   |         |         |          |   |          |          |          |   |         |          |          |   |         |          |          |   |         |          |          |   |         |          |         |   |         |          |          |   |         |         |         |   |         |         |         |   |         |         |          |   |         |         |         |   |          |          |         |   |          |         |         |   |          |         |         |   |          |          |          |   |          |          |          |   |          |          |          |
| H                                              | 7.60390                                                                                                                                                                                                                                                                                                                                                                                                                                                                                                                                                                                                                                                                                                                                                                                                                                                                                                                                                                                                                                                                                                                                                                                                                                                                                                                                                                                                                                                                                                                                                                                                                                                                                                                                                                                                                                                                                                                                                                                                                                   | -0.49482 | 0.83846  |   |          |          |          |   |         |          |          |   |         |          |          |   |         |         |          |   |         |         |          |   |         |         |          |   |         |         |          |   |         |          |          |   |         |          |          |   |          |         |          |   |         |         |          |   |          |          |          |   |         |          |          |   |         |          |          |   |         |          |          |   |         |          |         |   |         |          |          |   |         |         |         |   |         |         |         |   |         |         |          |   |         |         |         |   |          |          |         |   |          |         |         |   |          |         |         |   |          |          |          |   |          |          |          |   |          |          |          |
| H                                              | 7.46016                                                                                                                                                                                                                                                                                                                                                                                                                                                                                                                                                                                                                                                                                                                                                                                                                                                                                                                                                                                                                                                                                                                                                                                                                                                                                                                                                                                                                                                                                                                                                                                                                                                                                                                                                                                                                                                                                                                                                                                                                                   | -2.00256 | -0.11524 |   |          |          |          |   |         |          |          |   |         |          |          |   |         |         |          |   |         |         |          |   |         |         |          |   |         |         |          |   |         |          |          |   |         |          |          |   |          |         |          |   |         |         |          |   |          |          |          |   |         |          |          |   |         |          |          |   |         |          |          |   |         |          |         |   |         |          |          |   |         |         |         |   |         |         |         |   |         |         |          |   |         |         |         |   |          |          |         |   |          |         |         |   |          |         |         |   |          |          |          |   |          |          |          |   |          |          |          |
| C                                              | 2.34794                                                                                                                                                                                                                                                                                                                                                                                                                                                                                                                                                                                                                                                                                                                                                                                                                                                                                                                                                                                                                                                                                                                                                                                                                                                                                                                                                                                                                                                                                                                                                                                                                                                                                                                                                                                                                                                                                                                                                                                                                                   | 3.23354  | 0.00906  |   |          |          |          |   |         |          |          |   |         |          |          |   |         |         |          |   |         |         |          |   |         |         |          |   |         |         |          |   |         |          |          |   |         |          |          |   |          |         |          |   |         |         |          |   |          |          |          |   |         |          |          |   |         |          |          |   |         |          |          |   |         |          |         |   |         |          |          |   |         |         |         |   |         |         |         |   |         |         |          |   |         |         |         |   |          |          |         |   |          |         |         |   |          |         |         |   |          |          |          |   |          |          |          |   |          |          |          |
| H                                              | 2.95594                                                                                                                                                                                                                                                                                                                                                                                                                                                                                                                                                                                                                                                                                                                                                                                                                                                                                                                                                                                                                                                                                                                                                                                                                                                                                                                                                                                                                                                                                                                                                                                                                                                                                                                                                                                                                                                                                                                                                                                                                                   | 3.40589  | 0.90716  |   |          |          |          |   |         |          |          |   |         |          |          |   |         |         |          |   |         |         |          |   |         |         |          |   |         |         |          |   |         |          |          |   |         |          |          |   |          |         |          |   |         |         |          |   |          |          |          |   |         |          |          |   |         |          |          |   |         |          |          |   |         |          |         |   |         |          |          |   |         |         |         |   |         |         |         |   |         |         |          |   |         |         |         |   |          |          |         |   |          |         |         |   |          |         |         |   |          |          |          |   |          |          |          |   |          |          |          |
| H                                              | 2.98000                                                                                                                                                                                                                                                                                                                                                                                                                                                                                                                                                                                                                                                                                                                                                                                                                                                                                                                                                                                                                                                                                                                                                                                                                                                                                                                                                                                                                                                                                                                                                                                                                                                                                                                                                                                                                                                                                                                                                                                                                                   | 3.47466  | -0.85600 |   |          |          |          |   |         |          |          |   |         |          |          |   |         |         |          |   |         |         |          |   |         |         |          |   |         |         |          |   |         |          |          |   |         |          |          |   |          |         |          |   |         |         |          |   |          |          |          |   |         |          |          |   |         |          |          |   |         |          |          |   |         |          |         |   |         |          |          |   |         |         |         |   |         |         |         |   |         |         |          |   |         |         |         |   |          |          |         |   |          |         |         |   |          |         |         |   |          |          |          |   |          |          |          |   |          |          |          |
| H                                              | 1.51558                                                                                                                                                                                                                                                                                                                                                                                                                                                                                                                                                                                                                                                                                                                                                                                                                                                                                                                                                                                                                                                                                                                                                                                                                                                                                                                                                                                                                                                                                                                                                                                                                                                                                                                                                                                                                                                                                                                                                                                                                                   | 3.94529  | 0.02550  |   |          |          |          |   |         |          |          |   |         |          |          |   |         |         |          |   |         |         |          |   |         |         |          |   |         |         |          |   |         |          |          |   |         |          |          |   |          |         |          |   |         |         |          |   |          |          |          |   |         |          |          |   |         |          |          |   |         |          |          |   |         |          |         |   |         |          |          |   |         |         |         |   |         |         |         |   |         |         |          |   |         |         |         |   |          |          |         |   |          |         |         |   |          |         |         |   |          |          |          |   |          |          |          |   |          |          |          |
| C                                              | -2.78246                                                                                                                                                                                                                                                                                                                                                                                                                                                                                                                                                                                                                                                                                                                                                                                                                                                                                                                                                                                                                                                                                                                                                                                                                                                                                                                                                                                                                                                                                                                                                                                                                                                                                                                                                                                                                                                                                                                                                                                                                                  | -0.97471 | 1.05189  |   |          |          |          |   |         |          |          |   |         |          |          |   |         |         |          |   |         |         |          |   |         |         |          |   |         |         |          |   |         |          |          |   |         |          |          |   |          |         |          |   |         |         |          |   |          |          |          |   |         |          |          |   |         |          |          |   |         |          |          |   |         |          |         |   |         |          |          |   |         |         |         |   |         |         |         |   |         |         |          |   |         |         |         |   |          |          |         |   |          |         |         |   |          |         |         |   |          |          |          |   |          |          |          |   |          |          |          |
| C                                              | -4.55293                                                                                                                                                                                                                                                                                                                                                                                                                                                                                                                                                                                                                                                                                                                                                                                                                                                                                                                                                                                                                                                                                                                                                                                                                                                                                                                                                                                                                                                                                                                                                                                                                                                                                                                                                                                                                                                                                                                                                                                                                                  | 0.57940  | 0.18376  |   |          |          |          |   |         |          |          |   |         |          |          |   |         |         |          |   |         |         |          |   |         |         |          |   |         |         |          |   |         |          |          |   |         |          |          |   |          |         |          |   |         |         |          |   |          |          |          |   |         |          |          |   |         |          |          |   |         |          |          |   |         |          |         |   |         |          |          |   |         |         |         |   |         |         |         |   |         |         |          |   |         |         |         |   |          |          |         |   |          |         |         |   |          |         |         |   |          |          |          |   |          |          |          |   |          |          |          |
| O                                              | -5.07503                                                                                                                                                                                                                                                                                                                                                                                                                                                                                                                                                                                                                                                                                                                                                                                                                                                                                                                                                                                                                                                                                                                                                                                                                                                                                                                                                                                                                                                                                                                                                                                                                                                                                                                                                                                                                                                                                                                                                                                                                                  | 1.68413  | 0.02507  |   |          |          |          |   |         |          |          |   |         |          |          |   |         |         |          |   |         |         |          |   |         |         |          |   |         |         |          |   |         |          |          |   |         |          |          |   |          |         |          |   |         |         |          |   |          |          |          |   |         |          |          |   |         |          |          |   |         |          |          |   |         |          |         |   |         |          |          |   |         |         |         |   |         |         |         |   |         |         |          |   |         |         |         |   |          |          |         |   |          |         |         |   |          |         |         |   |          |          |          |   |          |          |          |   |          |          |          |
| C                                              | -2.03313                                                                                                                                                                                                                                                                                                                                                                                                                                                                                                                                                                                                                                                                                                                                                                                                                                                                                                                                                                                                                                                                                                                                                                                                                                                                                                                                                                                                                                                                                                                                                                                                                                                                                                                                                                                                                                                                                                                                                                                                                                  | -1.28874 | -1.57392 |   |          |          |          |   |         |          |          |   |         |          |          |   |         |         |          |   |         |         |          |   |         |         |          |   |         |         |          |   |         |          |          |   |         |          |          |   |          |         |          |   |         |         |          |   |          |          |          |   |         |          |          |   |         |          |          |   |         |          |          |   |         |          |         |   |         |          |          |   |         |         |         |   |         |         |         |   |         |         |          |   |         |         |         |   |          |          |         |   |          |         |         |   |          |         |         |   |          |          |          |   |          |          |          |   |          |          |          |
| H                                              | -2.64304                                                                                                                                                                                                                                                                                                                                                                                                                                                                                                                                                                                                                                                                                                                                                                                                                                                                                                                                                                                                                                                                                                                                                                                                                                                                                                                                                                                                                                                                                                                                                                                                                                                                                                                                                                                                                                                                                                                                                                                                                                  | -2.13800 | -1.93920 |   |          |          |          |   |         |          |          |   |         |          |          |   |         |         |          |   |         |         |          |   |         |         |          |   |         |         |          |   |         |          |          |   |         |          |          |   |          |         |          |   |         |         |          |   |          |          |          |   |         |          |          |   |         |          |          |   |         |          |          |   |         |          |         |   |         |          |          |   |         |         |         |   |         |         |         |   |         |         |          |   |         |         |         |   |          |          |         |   |          |         |         |   |          |         |         |   |          |          |          |   |          |          |          |   |          |          |          |
| H                                              | -2.67869                                                                                                                                                                                                                                                                                                                                                                                                                                                                                                                                                                                                                                                                                                                                                                                                                                                                                                                                                                                                                                                                                                                                                                                                                                                                                                                                                                                                                                                                                                                                                                                                                                                                                                                                                                                                                                                                                                                                                                                                                                  | -0.38969 | -1.60448 |   |          |          |          |   |         |          |          |   |         |          |          |   |         |         |          |   |         |         |          |   |         |         |          |   |         |         |          |   |         |          |          |   |         |          |          |   |          |         |          |   |         |         |          |   |          |          |          |   |         |          |          |   |         |          |          |   |         |          |          |   |         |          |         |   |         |          |          |   |         |         |         |   |         |         |         |   |         |         |          |   |         |         |         |   |          |          |         |   |          |         |         |   |          |         |         |   |          |          |          |   |          |          |          |   |          |          |          |



|   |          |          |          |
|---|----------|----------|----------|
| H | -1.22355 | -1.12767 | -2.31082 |
| C | -3.32490 | 0.29360  | 0.85560  |
| H | -2.80830 | 1.17113  | 1.23827  |
| O | -5.21031 | -0.56503 | -0.28584 |
| C | -6.44026 | -0.30621 | -0.93710 |
| H | -6.82576 | -1.28133 | -1.25220 |
| H | -6.30938 | 0.34098  | -1.81289 |
| H | -7.16231 | 0.18048  | -0.26952 |
| C | -1.83430 | -1.22357 | 2.20061  |
| H | -3.43323 | -1.81197 | 0.81544  |
| H | -2.40249 | -1.35431 | 3.13276  |
| H | -1.23617 | -2.12287 | 2.02818  |
| H | -1.15400 | -0.37657 | 2.34400  |

Optimized Molecular Properties for **T1-INT1**

|                                                |                                                                                                                                                                                                                                                                                                                                                                                                                                                                                                                                                                                                                                                                                                                                                                                                                                                                                                                                                                                                                                                                                                                                                                                                                                                                                                                                                                                                                                                                                                                                                                                                                                                                                                                                                                                                                                                                                                                                                                                                                                                      |          |          |          |         |   |          |          |         |   |          |          |         |   |          |         |         |   |          |         |          |   |          |         |          |   |          |         |          |   |          |          |          |   |          |          |          |   |         |         |          |   |          |         |          |   |         |          |          |   |          |          |         |   |          |          |         |   |          |          |         |   |          |          |          |   |          |          |         |   |          |         |          |   |          |         |          |   |          |         |         |   |          |         |          |   |         |          |          |   |         |         |          |   |         |         |          |   |         |          |         |   |         |          |         |   |         |          |         |
|------------------------------------------------|------------------------------------------------------------------------------------------------------------------------------------------------------------------------------------------------------------------------------------------------------------------------------------------------------------------------------------------------------------------------------------------------------------------------------------------------------------------------------------------------------------------------------------------------------------------------------------------------------------------------------------------------------------------------------------------------------------------------------------------------------------------------------------------------------------------------------------------------------------------------------------------------------------------------------------------------------------------------------------------------------------------------------------------------------------------------------------------------------------------------------------------------------------------------------------------------------------------------------------------------------------------------------------------------------------------------------------------------------------------------------------------------------------------------------------------------------------------------------------------------------------------------------------------------------------------------------------------------------------------------------------------------------------------------------------------------------------------------------------------------------------------------------------------------------------------------------------------------------------------------------------------------------------------------------------------------------------------------------------------------------------------------------------------------------|----------|----------|----------|---------|---|----------|----------|---------|---|----------|----------|---------|---|----------|---------|---------|---|----------|---------|----------|---|----------|---------|----------|---|----------|---------|----------|---|----------|----------|----------|---|----------|----------|----------|---|---------|---------|----------|---|----------|---------|----------|---|---------|----------|----------|---|----------|----------|---------|---|----------|----------|---------|---|----------|----------|---------|---|----------|----------|----------|---|----------|----------|---------|---|----------|---------|----------|---|----------|---------|----------|---|----------|---------|---------|---|----------|---------|----------|---|---------|----------|----------|---|---------|---------|----------|---|---------|---------|----------|---|---------|----------|---------|---|---------|----------|---------|---|---------|----------|---------|
| Number of<br>(-)<br>Vibrational<br>Frequencies | 0                                                                                                                                                                                                                                                                                                                                                                                                                                                                                                                                                                                                                                                                                                                                                                                                                                                                                                                                                                                                                                                                                                                                                                                                                                                                                                                                                                                                                                                                                                                                                                                                                                                                                                                                                                                                                                                                                                                                                                                                                                                    |          |          |          |         |   |          |          |         |   |          |          |         |   |          |         |         |   |          |         |          |   |          |         |          |   |          |         |          |   |          |          |          |   |          |          |          |   |         |         |          |   |          |         |          |   |         |          |          |   |          |          |         |   |          |          |         |   |          |          |         |   |          |          |          |   |          |          |         |   |          |         |          |   |          |         |          |   |          |         |         |   |          |         |          |   |         |          |          |   |         |         |          |   |         |         |          |   |         |          |         |   |         |          |         |   |         |          |         |
| Absolute<br>Energies<br>(Hartrees)             | <p><b>B3LYP/6-31G(d)</b></p> <p>There are 11 positive frequencies below 100 cm<sup>-1</sup>.</p> <p>Zero-point correction: 0.329244 hartree<br/>         Enthalpy correction: 0.354268 hartree<br/>         Free Energy correction: 0.270498 hartree<br/>         Quasiharmonic Free Energy correction: 0.277958 hartree</p> <p>SCF Energy: -955.602345 hartree<br/>         SCF Energy + ZPVE: -955.273101 hartree<br/>         Enthalpy: -955.248077 hartree<br/>         Free Energy: -955.331847 hartree</p> <p>Free Energy with quasiharmonic correction: -955.324387 hartree<br/>         (correction: 4.68 kcal/mol)</p> <p><b>B3LYP-D3/6-311+G(d,p)</b></p> <p>SCF Done: E(RB3LYP) = -955.950850463 A.U.</p>                                                                                                                                                                                                                                                                                                                                                                                                                                                                                                                                                                                                                                                                                                                                                                                                                                                                                                                                                                                                                                                                                                                                                                                                                                                                                                                                 |          |          |          |         |   |          |          |         |   |          |          |         |   |          |         |         |   |          |         |          |   |          |         |          |   |          |         |          |   |          |          |          |   |          |          |          |   |         |         |          |   |          |         |          |   |         |          |          |   |          |          |         |   |          |          |         |   |          |          |         |   |          |          |          |   |          |          |         |   |          |         |          |   |          |         |          |   |          |         |         |   |          |         |          |   |         |          |          |   |         |         |          |   |         |         |          |   |         |          |         |   |         |          |         |   |         |          |         |
| Cartesian<br>Coordinates                       | <p>40<br/>spD3-INT1-T1.out Energy: -599868.2105641</p> <table> <tbody> <tr><td>O</td><td>1.83224</td><td>-2.15442</td><td>0.31753</td></tr> <tr><td>C</td><td>-5.30205</td><td>-0.60704</td><td>0.24883</td></tr> <tr><td>O</td><td>-4.58068</td><td>-1.59021</td><td>0.33464</td></tr> <tr><td>O</td><td>-4.89250</td><td>0.63365</td><td>0.03786</td></tr> <tr><td>C</td><td>-1.33734</td><td>1.74633</td><td>-0.38226</td></tr> <tr><td>C</td><td>-0.07193</td><td>1.20852</td><td>-0.40169</td></tr> <tr><td>N</td><td>-2.25910</td><td>0.73285</td><td>-0.17744</td></tr> <tr><td>C</td><td>-1.55734</td><td>-0.38798</td><td>-0.07494</td></tr> <tr><td>N</td><td>-0.23525</td><td>-0.14709</td><td>-0.20617</td></tr> <tr><td>H</td><td>0.91002</td><td>1.65073</td><td>-0.52935</td></tr> <tr><td>H</td><td>-3.85139</td><td>0.67229</td><td>-0.04801</td></tr> <tr><td>H</td><td>0.53044</td><td>-0.83784</td><td>-0.15489</td></tr> <tr><td>H</td><td>-1.99117</td><td>-1.36362</td><td>0.09069</td></tr> <tr><td>C</td><td>-6.81624</td><td>-0.68803</td><td>0.37890</td></tr> <tr><td>H</td><td>-7.15449</td><td>-0.06122</td><td>1.21156</td></tr> <tr><td>H</td><td>-7.29160</td><td>-0.30212</td><td>-0.52972</td></tr> <tr><td>H</td><td>-7.12138</td><td>-1.72256</td><td>0.54637</td></tr> <tr><td>C</td><td>-1.75415</td><td>3.17460</td><td>-0.54657</td></tr> <tr><td>H</td><td>-2.41787</td><td>3.30629</td><td>-1.41161</td></tr> <tr><td>H</td><td>-2.29820</td><td>3.54179</td><td>0.33392</td></tr> <tr><td>H</td><td>-0.87739</td><td>3.81332</td><td>-0.69316</td></tr> <tr><td>C</td><td>3.01724</td><td>-1.69989</td><td>-0.53669</td></tr> <tr><td>C</td><td>3.43135</td><td>0.81614</td><td>-0.31633</td></tr> <tr><td>O</td><td>3.25483</td><td>2.02369</td><td>-0.58170</td></tr> <tr><td>C</td><td>1.98945</td><td>-1.80155</td><td>1.67494</td></tr> <tr><td>H</td><td>2.84587</td><td>-2.32755</td><td>2.13133</td></tr> <tr><td>H</td><td>2.15151</td><td>-0.72300</td><td>1.80575</td></tr> </tbody> </table> | O        | 1.83224  | -2.15442 | 0.31753 | C | -5.30205 | -0.60704 | 0.24883 | O | -4.58068 | -1.59021 | 0.33464 | O | -4.89250 | 0.63365 | 0.03786 | C | -1.33734 | 1.74633 | -0.38226 | C | -0.07193 | 1.20852 | -0.40169 | N | -2.25910 | 0.73285 | -0.17744 | C | -1.55734 | -0.38798 | -0.07494 | N | -0.23525 | -0.14709 | -0.20617 | H | 0.91002 | 1.65073 | -0.52935 | H | -3.85139 | 0.67229 | -0.04801 | H | 0.53044 | -0.83784 | -0.15489 | H | -1.99117 | -1.36362 | 0.09069 | C | -6.81624 | -0.68803 | 0.37890 | H | -7.15449 | -0.06122 | 1.21156 | H | -7.29160 | -0.30212 | -0.52972 | H | -7.12138 | -1.72256 | 0.54637 | C | -1.75415 | 3.17460 | -0.54657 | H | -2.41787 | 3.30629 | -1.41161 | H | -2.29820 | 3.54179 | 0.33392 | H | -0.87739 | 3.81332 | -0.69316 | C | 3.01724 | -1.69989 | -0.53669 | C | 3.43135 | 0.81614 | -0.31633 | O | 3.25483 | 2.02369 | -0.58170 | C | 1.98945 | -1.80155 | 1.67494 | H | 2.84587 | -2.32755 | 2.13133 | H | 2.15151 | -0.72300 | 1.80575 |
| O                                              | 1.83224                                                                                                                                                                                                                                                                                                                                                                                                                                                                                                                                                                                                                                                                                                                                                                                                                                                                                                                                                                                                                                                                                                                                                                                                                                                                                                                                                                                                                                                                                                                                                                                                                                                                                                                                                                                                                                                                                                                                                                                                                                              | -2.15442 | 0.31753  |          |         |   |          |          |         |   |          |          |         |   |          |         |         |   |          |         |          |   |          |         |          |   |          |         |          |   |          |          |          |   |          |          |          |   |         |         |          |   |          |         |          |   |         |          |          |   |          |          |         |   |          |          |         |   |          |          |         |   |          |          |          |   |          |          |         |   |          |         |          |   |          |         |          |   |          |         |         |   |          |         |          |   |         |          |          |   |         |         |          |   |         |         |          |   |         |          |         |   |         |          |         |   |         |          |         |
| C                                              | -5.30205                                                                                                                                                                                                                                                                                                                                                                                                                                                                                                                                                                                                                                                                                                                                                                                                                                                                                                                                                                                                                                                                                                                                                                                                                                                                                                                                                                                                                                                                                                                                                                                                                                                                                                                                                                                                                                                                                                                                                                                                                                             | -0.60704 | 0.24883  |          |         |   |          |          |         |   |          |          |         |   |          |         |         |   |          |         |          |   |          |         |          |   |          |         |          |   |          |          |          |   |          |          |          |   |         |         |          |   |          |         |          |   |         |          |          |   |          |          |         |   |          |          |         |   |          |          |         |   |          |          |          |   |          |          |         |   |          |         |          |   |          |         |          |   |          |         |         |   |          |         |          |   |         |          |          |   |         |         |          |   |         |         |          |   |         |          |         |   |         |          |         |   |         |          |         |
| O                                              | -4.58068                                                                                                                                                                                                                                                                                                                                                                                                                                                                                                                                                                                                                                                                                                                                                                                                                                                                                                                                                                                                                                                                                                                                                                                                                                                                                                                                                                                                                                                                                                                                                                                                                                                                                                                                                                                                                                                                                                                                                                                                                                             | -1.59021 | 0.33464  |          |         |   |          |          |         |   |          |          |         |   |          |         |         |   |          |         |          |   |          |         |          |   |          |         |          |   |          |          |          |   |          |          |          |   |         |         |          |   |          |         |          |   |         |          |          |   |          |          |         |   |          |          |         |   |          |          |         |   |          |          |          |   |          |          |         |   |          |         |          |   |          |         |          |   |          |         |         |   |          |         |          |   |         |          |          |   |         |         |          |   |         |         |          |   |         |          |         |   |         |          |         |   |         |          |         |
| O                                              | -4.89250                                                                                                                                                                                                                                                                                                                                                                                                                                                                                                                                                                                                                                                                                                                                                                                                                                                                                                                                                                                                                                                                                                                                                                                                                                                                                                                                                                                                                                                                                                                                                                                                                                                                                                                                                                                                                                                                                                                                                                                                                                             | 0.63365  | 0.03786  |          |         |   |          |          |         |   |          |          |         |   |          |         |         |   |          |         |          |   |          |         |          |   |          |         |          |   |          |          |          |   |          |          |          |   |         |         |          |   |          |         |          |   |         |          |          |   |          |          |         |   |          |          |         |   |          |          |         |   |          |          |          |   |          |          |         |   |          |         |          |   |          |         |          |   |          |         |         |   |          |         |          |   |         |          |          |   |         |         |          |   |         |         |          |   |         |          |         |   |         |          |         |   |         |          |         |
| C                                              | -1.33734                                                                                                                                                                                                                                                                                                                                                                                                                                                                                                                                                                                                                                                                                                                                                                                                                                                                                                                                                                                                                                                                                                                                                                                                                                                                                                                                                                                                                                                                                                                                                                                                                                                                                                                                                                                                                                                                                                                                                                                                                                             | 1.74633  | -0.38226 |          |         |   |          |          |         |   |          |          |         |   |          |         |         |   |          |         |          |   |          |         |          |   |          |         |          |   |          |          |          |   |          |          |          |   |         |         |          |   |          |         |          |   |         |          |          |   |          |          |         |   |          |          |         |   |          |          |         |   |          |          |          |   |          |          |         |   |          |         |          |   |          |         |          |   |          |         |         |   |          |         |          |   |         |          |          |   |         |         |          |   |         |         |          |   |         |          |         |   |         |          |         |   |         |          |         |
| C                                              | -0.07193                                                                                                                                                                                                                                                                                                                                                                                                                                                                                                                                                                                                                                                                                                                                                                                                                                                                                                                                                                                                                                                                                                                                                                                                                                                                                                                                                                                                                                                                                                                                                                                                                                                                                                                                                                                                                                                                                                                                                                                                                                             | 1.20852  | -0.40169 |          |         |   |          |          |         |   |          |          |         |   |          |         |         |   |          |         |          |   |          |         |          |   |          |         |          |   |          |          |          |   |          |          |          |   |         |         |          |   |          |         |          |   |         |          |          |   |          |          |         |   |          |          |         |   |          |          |         |   |          |          |          |   |          |          |         |   |          |         |          |   |          |         |          |   |          |         |         |   |          |         |          |   |         |          |          |   |         |         |          |   |         |         |          |   |         |          |         |   |         |          |         |   |         |          |         |
| N                                              | -2.25910                                                                                                                                                                                                                                                                                                                                                                                                                                                                                                                                                                                                                                                                                                                                                                                                                                                                                                                                                                                                                                                                                                                                                                                                                                                                                                                                                                                                                                                                                                                                                                                                                                                                                                                                                                                                                                                                                                                                                                                                                                             | 0.73285  | -0.17744 |          |         |   |          |          |         |   |          |          |         |   |          |         |         |   |          |         |          |   |          |         |          |   |          |         |          |   |          |          |          |   |          |          |          |   |         |         |          |   |          |         |          |   |         |          |          |   |          |          |         |   |          |          |         |   |          |          |         |   |          |          |          |   |          |          |         |   |          |         |          |   |          |         |          |   |          |         |         |   |          |         |          |   |         |          |          |   |         |         |          |   |         |         |          |   |         |          |         |   |         |          |         |   |         |          |         |
| C                                              | -1.55734                                                                                                                                                                                                                                                                                                                                                                                                                                                                                                                                                                                                                                                                                                                                                                                                                                                                                                                                                                                                                                                                                                                                                                                                                                                                                                                                                                                                                                                                                                                                                                                                                                                                                                                                                                                                                                                                                                                                                                                                                                             | -0.38798 | -0.07494 |          |         |   |          |          |         |   |          |          |         |   |          |         |         |   |          |         |          |   |          |         |          |   |          |         |          |   |          |          |          |   |          |          |          |   |         |         |          |   |          |         |          |   |         |          |          |   |          |          |         |   |          |          |         |   |          |          |         |   |          |          |          |   |          |          |         |   |          |         |          |   |          |         |          |   |          |         |         |   |          |         |          |   |         |          |          |   |         |         |          |   |         |         |          |   |         |          |         |   |         |          |         |   |         |          |         |
| N                                              | -0.23525                                                                                                                                                                                                                                                                                                                                                                                                                                                                                                                                                                                                                                                                                                                                                                                                                                                                                                                                                                                                                                                                                                                                                                                                                                                                                                                                                                                                                                                                                                                                                                                                                                                                                                                                                                                                                                                                                                                                                                                                                                             | -0.14709 | -0.20617 |          |         |   |          |          |         |   |          |          |         |   |          |         |         |   |          |         |          |   |          |         |          |   |          |         |          |   |          |          |          |   |          |          |          |   |         |         |          |   |          |         |          |   |         |          |          |   |          |          |         |   |          |          |         |   |          |          |         |   |          |          |          |   |          |          |         |   |          |         |          |   |          |         |          |   |          |         |         |   |          |         |          |   |         |          |          |   |         |         |          |   |         |         |          |   |         |          |         |   |         |          |         |   |         |          |         |
| H                                              | 0.91002                                                                                                                                                                                                                                                                                                                                                                                                                                                                                                                                                                                                                                                                                                                                                                                                                                                                                                                                                                                                                                                                                                                                                                                                                                                                                                                                                                                                                                                                                                                                                                                                                                                                                                                                                                                                                                                                                                                                                                                                                                              | 1.65073  | -0.52935 |          |         |   |          |          |         |   |          |          |         |   |          |         |         |   |          |         |          |   |          |         |          |   |          |         |          |   |          |          |          |   |          |          |          |   |         |         |          |   |          |         |          |   |         |          |          |   |          |          |         |   |          |          |         |   |          |          |         |   |          |          |          |   |          |          |         |   |          |         |          |   |          |         |          |   |          |         |         |   |          |         |          |   |         |          |          |   |         |         |          |   |         |         |          |   |         |          |         |   |         |          |         |   |         |          |         |
| H                                              | -3.85139                                                                                                                                                                                                                                                                                                                                                                                                                                                                                                                                                                                                                                                                                                                                                                                                                                                                                                                                                                                                                                                                                                                                                                                                                                                                                                                                                                                                                                                                                                                                                                                                                                                                                                                                                                                                                                                                                                                                                                                                                                             | 0.67229  | -0.04801 |          |         |   |          |          |         |   |          |          |         |   |          |         |         |   |          |         |          |   |          |         |          |   |          |         |          |   |          |          |          |   |          |          |          |   |         |         |          |   |          |         |          |   |         |          |          |   |          |          |         |   |          |          |         |   |          |          |         |   |          |          |          |   |          |          |         |   |          |         |          |   |          |         |          |   |          |         |         |   |          |         |          |   |         |          |          |   |         |         |          |   |         |         |          |   |         |          |         |   |         |          |         |   |         |          |         |
| H                                              | 0.53044                                                                                                                                                                                                                                                                                                                                                                                                                                                                                                                                                                                                                                                                                                                                                                                                                                                                                                                                                                                                                                                                                                                                                                                                                                                                                                                                                                                                                                                                                                                                                                                                                                                                                                                                                                                                                                                                                                                                                                                                                                              | -0.83784 | -0.15489 |          |         |   |          |          |         |   |          |          |         |   |          |         |         |   |          |         |          |   |          |         |          |   |          |         |          |   |          |          |          |   |          |          |          |   |         |         |          |   |          |         |          |   |         |          |          |   |          |          |         |   |          |          |         |   |          |          |         |   |          |          |          |   |          |          |         |   |          |         |          |   |          |         |          |   |          |         |         |   |          |         |          |   |         |          |          |   |         |         |          |   |         |         |          |   |         |          |         |   |         |          |         |   |         |          |         |
| H                                              | -1.99117                                                                                                                                                                                                                                                                                                                                                                                                                                                                                                                                                                                                                                                                                                                                                                                                                                                                                                                                                                                                                                                                                                                                                                                                                                                                                                                                                                                                                                                                                                                                                                                                                                                                                                                                                                                                                                                                                                                                                                                                                                             | -1.36362 | 0.09069  |          |         |   |          |          |         |   |          |          |         |   |          |         |         |   |          |         |          |   |          |         |          |   |          |         |          |   |          |          |          |   |          |          |          |   |         |         |          |   |          |         |          |   |         |          |          |   |          |          |         |   |          |          |         |   |          |          |         |   |          |          |          |   |          |          |         |   |          |         |          |   |          |         |          |   |          |         |         |   |          |         |          |   |         |          |          |   |         |         |          |   |         |         |          |   |         |          |         |   |         |          |         |   |         |          |         |
| C                                              | -6.81624                                                                                                                                                                                                                                                                                                                                                                                                                                                                                                                                                                                                                                                                                                                                                                                                                                                                                                                                                                                                                                                                                                                                                                                                                                                                                                                                                                                                                                                                                                                                                                                                                                                                                                                                                                                                                                                                                                                                                                                                                                             | -0.68803 | 0.37890  |          |         |   |          |          |         |   |          |          |         |   |          |         |         |   |          |         |          |   |          |         |          |   |          |         |          |   |          |          |          |   |          |          |          |   |         |         |          |   |          |         |          |   |         |          |          |   |          |          |         |   |          |          |         |   |          |          |         |   |          |          |          |   |          |          |         |   |          |         |          |   |          |         |          |   |          |         |         |   |          |         |          |   |         |          |          |   |         |         |          |   |         |         |          |   |         |          |         |   |         |          |         |   |         |          |         |
| H                                              | -7.15449                                                                                                                                                                                                                                                                                                                                                                                                                                                                                                                                                                                                                                                                                                                                                                                                                                                                                                                                                                                                                                                                                                                                                                                                                                                                                                                                                                                                                                                                                                                                                                                                                                                                                                                                                                                                                                                                                                                                                                                                                                             | -0.06122 | 1.21156  |          |         |   |          |          |         |   |          |          |         |   |          |         |         |   |          |         |          |   |          |         |          |   |          |         |          |   |          |          |          |   |          |          |          |   |         |         |          |   |          |         |          |   |         |          |          |   |          |          |         |   |          |          |         |   |          |          |         |   |          |          |          |   |          |          |         |   |          |         |          |   |          |         |          |   |          |         |         |   |          |         |          |   |         |          |          |   |         |         |          |   |         |         |          |   |         |          |         |   |         |          |         |   |         |          |         |
| H                                              | -7.29160                                                                                                                                                                                                                                                                                                                                                                                                                                                                                                                                                                                                                                                                                                                                                                                                                                                                                                                                                                                                                                                                                                                                                                                                                                                                                                                                                                                                                                                                                                                                                                                                                                                                                                                                                                                                                                                                                                                                                                                                                                             | -0.30212 | -0.52972 |          |         |   |          |          |         |   |          |          |         |   |          |         |         |   |          |         |          |   |          |         |          |   |          |         |          |   |          |          |          |   |          |          |          |   |         |         |          |   |          |         |          |   |         |          |          |   |          |          |         |   |          |          |         |   |          |          |         |   |          |          |          |   |          |          |         |   |          |         |          |   |          |         |          |   |          |         |         |   |          |         |          |   |         |          |          |   |         |         |          |   |         |         |          |   |         |          |         |   |         |          |         |   |         |          |         |
| H                                              | -7.12138                                                                                                                                                                                                                                                                                                                                                                                                                                                                                                                                                                                                                                                                                                                                                                                                                                                                                                                                                                                                                                                                                                                                                                                                                                                                                                                                                                                                                                                                                                                                                                                                                                                                                                                                                                                                                                                                                                                                                                                                                                             | -1.72256 | 0.54637  |          |         |   |          |          |         |   |          |          |         |   |          |         |         |   |          |         |          |   |          |         |          |   |          |         |          |   |          |          |          |   |          |          |          |   |         |         |          |   |          |         |          |   |         |          |          |   |          |          |         |   |          |          |         |   |          |          |         |   |          |          |          |   |          |          |         |   |          |         |          |   |          |         |          |   |          |         |         |   |          |         |          |   |         |          |          |   |         |         |          |   |         |         |          |   |         |          |         |   |         |          |         |   |         |          |         |
| C                                              | -1.75415                                                                                                                                                                                                                                                                                                                                                                                                                                                                                                                                                                                                                                                                                                                                                                                                                                                                                                                                                                                                                                                                                                                                                                                                                                                                                                                                                                                                                                                                                                                                                                                                                                                                                                                                                                                                                                                                                                                                                                                                                                             | 3.17460  | -0.54657 |          |         |   |          |          |         |   |          |          |         |   |          |         |         |   |          |         |          |   |          |         |          |   |          |         |          |   |          |          |          |   |          |          |          |   |         |         |          |   |          |         |          |   |         |          |          |   |          |          |         |   |          |          |         |   |          |          |         |   |          |          |          |   |          |          |         |   |          |         |          |   |          |         |          |   |          |         |         |   |          |         |          |   |         |          |          |   |         |         |          |   |         |         |          |   |         |          |         |   |         |          |         |   |         |          |         |
| H                                              | -2.41787                                                                                                                                                                                                                                                                                                                                                                                                                                                                                                                                                                                                                                                                                                                                                                                                                                                                                                                                                                                                                                                                                                                                                                                                                                                                                                                                                                                                                                                                                                                                                                                                                                                                                                                                                                                                                                                                                                                                                                                                                                             | 3.30629  | -1.41161 |          |         |   |          |          |         |   |          |          |         |   |          |         |         |   |          |         |          |   |          |         |          |   |          |         |          |   |          |          |          |   |          |          |          |   |         |         |          |   |          |         |          |   |         |          |          |   |          |          |         |   |          |          |         |   |          |          |         |   |          |          |          |   |          |          |         |   |          |         |          |   |          |         |          |   |          |         |         |   |          |         |          |   |         |          |          |   |         |         |          |   |         |         |          |   |         |          |         |   |         |          |         |   |         |          |         |
| H                                              | -2.29820                                                                                                                                                                                                                                                                                                                                                                                                                                                                                                                                                                                                                                                                                                                                                                                                                                                                                                                                                                                                                                                                                                                                                                                                                                                                                                                                                                                                                                                                                                                                                                                                                                                                                                                                                                                                                                                                                                                                                                                                                                             | 3.54179  | 0.33392  |          |         |   |          |          |         |   |          |          |         |   |          |         |         |   |          |         |          |   |          |         |          |   |          |         |          |   |          |          |          |   |          |          |          |   |         |         |          |   |          |         |          |   |         |          |          |   |          |          |         |   |          |          |         |   |          |          |         |   |          |          |          |   |          |          |         |   |          |         |          |   |          |         |          |   |          |         |         |   |          |         |          |   |         |          |          |   |         |         |          |   |         |         |          |   |         |          |         |   |         |          |         |   |         |          |         |
| H                                              | -0.87739                                                                                                                                                                                                                                                                                                                                                                                                                                                                                                                                                                                                                                                                                                                                                                                                                                                                                                                                                                                                                                                                                                                                                                                                                                                                                                                                                                                                                                                                                                                                                                                                                                                                                                                                                                                                                                                                                                                                                                                                                                             | 3.81332  | -0.69316 |          |         |   |          |          |         |   |          |          |         |   |          |         |         |   |          |         |          |   |          |         |          |   |          |         |          |   |          |          |          |   |          |          |          |   |         |         |          |   |          |         |          |   |         |          |          |   |          |          |         |   |          |          |         |   |          |          |         |   |          |          |          |   |          |          |         |   |          |         |          |   |          |         |          |   |          |         |         |   |          |         |          |   |         |          |          |   |         |         |          |   |         |         |          |   |         |          |         |   |         |          |         |   |         |          |         |
| C                                              | 3.01724                                                                                                                                                                                                                                                                                                                                                                                                                                                                                                                                                                                                                                                                                                                                                                                                                                                                                                                                                                                                                                                                                                                                                                                                                                                                                                                                                                                                                                                                                                                                                                                                                                                                                                                                                                                                                                                                                                                                                                                                                                              | -1.69989 | -0.53669 |          |         |   |          |          |         |   |          |          |         |   |          |         |         |   |          |         |          |   |          |         |          |   |          |         |          |   |          |          |          |   |          |          |          |   |         |         |          |   |          |         |          |   |         |          |          |   |          |          |         |   |          |          |         |   |          |          |         |   |          |          |          |   |          |          |         |   |          |         |          |   |          |         |          |   |          |         |         |   |          |         |          |   |         |          |          |   |         |         |          |   |         |         |          |   |         |          |         |   |         |          |         |   |         |          |         |
| C                                              | 3.43135                                                                                                                                                                                                                                                                                                                                                                                                                                                                                                                                                                                                                                                                                                                                                                                                                                                                                                                                                                                                                                                                                                                                                                                                                                                                                                                                                                                                                                                                                                                                                                                                                                                                                                                                                                                                                                                                                                                                                                                                                                              | 0.81614  | -0.31633 |          |         |   |          |          |         |   |          |          |         |   |          |         |         |   |          |         |          |   |          |         |          |   |          |         |          |   |          |          |          |   |          |          |          |   |         |         |          |   |          |         |          |   |         |          |          |   |          |          |         |   |          |          |         |   |          |          |         |   |          |          |          |   |          |          |         |   |          |         |          |   |          |         |          |   |          |         |         |   |          |         |          |   |         |          |          |   |         |         |          |   |         |         |          |   |         |          |         |   |         |          |         |   |         |          |         |
| O                                              | 3.25483                                                                                                                                                                                                                                                                                                                                                                                                                                                                                                                                                                                                                                                                                                                                                                                                                                                                                                                                                                                                                                                                                                                                                                                                                                                                                                                                                                                                                                                                                                                                                                                                                                                                                                                                                                                                                                                                                                                                                                                                                                              | 2.02369  | -0.58170 |          |         |   |          |          |         |   |          |          |         |   |          |         |         |   |          |         |          |   |          |         |          |   |          |         |          |   |          |          |          |   |          |          |          |   |         |         |          |   |          |         |          |   |         |          |          |   |          |          |         |   |          |          |         |   |          |          |         |   |          |          |          |   |          |          |         |   |          |         |          |   |          |         |          |   |          |         |         |   |          |         |          |   |         |          |          |   |         |         |          |   |         |         |          |   |         |          |         |   |         |          |         |   |         |          |         |
| C                                              | 1.98945                                                                                                                                                                                                                                                                                                                                                                                                                                                                                                                                                                                                                                                                                                                                                                                                                                                                                                                                                                                                                                                                                                                                                                                                                                                                                                                                                                                                                                                                                                                                                                                                                                                                                                                                                                                                                                                                                                                                                                                                                                              | -1.80155 | 1.67494  |          |         |   |          |          |         |   |          |          |         |   |          |         |         |   |          |         |          |   |          |         |          |   |          |         |          |   |          |          |          |   |          |          |          |   |         |         |          |   |          |         |          |   |         |          |          |   |          |          |         |   |          |          |         |   |          |          |         |   |          |          |          |   |          |          |         |   |          |         |          |   |          |         |          |   |          |         |         |   |          |         |          |   |         |          |          |   |         |         |          |   |         |         |          |   |         |          |         |   |         |          |         |   |         |          |         |
| H                                              | 2.84587                                                                                                                                                                                                                                                                                                                                                                                                                                                                                                                                                                                                                                                                                                                                                                                                                                                                                                                                                                                                                                                                                                                                                                                                                                                                                                                                                                                                                                                                                                                                                                                                                                                                                                                                                                                                                                                                                                                                                                                                                                              | -2.32755 | 2.13133  |          |         |   |          |          |         |   |          |          |         |   |          |         |         |   |          |         |          |   |          |         |          |   |          |         |          |   |          |          |          |   |          |          |          |   |         |         |          |   |          |         |          |   |         |          |          |   |          |          |         |   |          |          |         |   |          |          |         |   |          |          |          |   |          |          |         |   |          |         |          |   |          |         |          |   |          |         |         |   |          |         |          |   |         |          |          |   |         |         |          |   |         |         |          |   |         |          |         |   |         |          |         |   |         |          |         |
| H                                              | 2.15151                                                                                                                                                                                                                                                                                                                                                                                                                                                                                                                                                                                                                                                                                                                                                                                                                                                                                                                                                                                                                                                                                                                                                                                                                                                                                                                                                                                                                                                                                                                                                                                                                                                                                                                                                                                                                                                                                                                                                                                                                                              | -0.72300 | 1.80575  |          |         |   |          |          |         |   |          |          |         |   |          |         |         |   |          |         |          |   |          |         |          |   |          |         |          |   |          |          |          |   |          |          |          |   |         |         |          |   |          |         |          |   |         |          |          |   |          |          |         |   |          |          |         |   |          |          |         |   |          |          |          |   |          |          |         |   |          |         |          |   |          |         |          |   |          |         |         |   |          |         |          |   |         |          |          |   |         |         |          |   |         |         |          |   |         |          |         |   |         |          |         |   |         |          |         |

|   |         |          |          |
|---|---------|----------|----------|
| H | 1.07627 | -2.09826 | 2.20642  |
| C | 2.92633 | -0.30350 | -0.97602 |
| H | 2.32818 | -0.09069 | -1.85950 |
| O | 4.25727 | 0.49520  | 0.80483  |
| C | 4.79103 | 1.61977  | 1.46906  |
| H | 5.34192 | 1.23114  | 2.33446  |
| H | 4.00953 | 2.31096  | 1.80924  |
| H | 5.47745 | 2.19410  | 0.83110  |
| C | 3.00605 | -2.71219 | -1.68178 |
| H | 3.89187 | -1.86774 | 0.10466  |
| H | 3.88904 | -2.57109 | -2.31494 |
| H | 2.99154 | -3.74375 | -1.30944 |
| H | 2.11664 | -2.56583 | -2.30746 |

Optimized Molecular Properties for **T1-TS2**

|                                                |                                                                                                                                                                                                                                                                                                                                                                                                                                                                                                                                                                                                                                                                                                                                                                                                                                                                                                                                                                                                                                                                                                                                                                                                                                                                                                                                                                                                                                                                                                                                                                                                                                                                                                                                                                                                                                                                                                                                                                                                                                                         |          |          |         |          |   |          |          |          |   |          |         |          |   |          |          |         |   |          |          |         |   |          |          |         |   |          |          |         |   |          |         |          |   |          |         |          |   |          |          |         |   |          |          |         |   |          |         |          |   |          |         |          |   |          |          |          |   |          |          |          |   |          |          |         |   |          |         |          |   |          |          |         |   |          |          |         |   |          |          |         |   |          |          |         |   |         |         |          |   |         |         |         |   |         |         |         |   |         |         |          |   |          |         |          |   |         |         |          |
|------------------------------------------------|---------------------------------------------------------------------------------------------------------------------------------------------------------------------------------------------------------------------------------------------------------------------------------------------------------------------------------------------------------------------------------------------------------------------------------------------------------------------------------------------------------------------------------------------------------------------------------------------------------------------------------------------------------------------------------------------------------------------------------------------------------------------------------------------------------------------------------------------------------------------------------------------------------------------------------------------------------------------------------------------------------------------------------------------------------------------------------------------------------------------------------------------------------------------------------------------------------------------------------------------------------------------------------------------------------------------------------------------------------------------------------------------------------------------------------------------------------------------------------------------------------------------------------------------------------------------------------------------------------------------------------------------------------------------------------------------------------------------------------------------------------------------------------------------------------------------------------------------------------------------------------------------------------------------------------------------------------------------------------------------------------------------------------------------------------|----------|----------|---------|----------|---|----------|----------|----------|---|----------|---------|----------|---|----------|----------|---------|---|----------|----------|---------|---|----------|----------|---------|---|----------|----------|---------|---|----------|---------|----------|---|----------|---------|----------|---|----------|----------|---------|---|----------|----------|---------|---|----------|---------|----------|---|----------|---------|----------|---|----------|----------|----------|---|----------|----------|----------|---|----------|----------|---------|---|----------|---------|----------|---|----------|----------|---------|---|----------|----------|---------|---|----------|----------|---------|---|----------|----------|---------|---|---------|---------|----------|---|---------|---------|---------|---|---------|---------|---------|---|---------|---------|----------|---|----------|---------|----------|---|---------|---------|----------|
| Number of<br>(-)<br>Vibrational<br>Frequencies | 1 (-116.7123)                                                                                                                                                                                                                                                                                                                                                                                                                                                                                                                                                                                                                                                                                                                                                                                                                                                                                                                                                                                                                                                                                                                                                                                                                                                                                                                                                                                                                                                                                                                                                                                                                                                                                                                                                                                                                                                                                                                                                                                                                                           |          |          |         |          |   |          |          |          |   |          |         |          |   |          |          |         |   |          |          |         |   |          |          |         |   |          |          |         |   |          |         |          |   |          |         |          |   |          |          |         |   |          |          |         |   |          |         |          |   |          |         |          |   |          |          |          |   |          |          |          |   |          |          |         |   |          |         |          |   |          |          |         |   |          |          |         |   |          |          |         |   |          |          |         |   |         |         |          |   |         |         |         |   |         |         |         |   |         |         |          |   |          |         |          |   |         |         |          |
| Absolute<br>Energies<br>(Hartrees)             | <p><b>B3LYP/6-31G(d)</b></p> <p>There are 14 positive frequencies below 100 cm<sup>-1</sup>.</p> <p>Zero-point correction: 0.442993 hartree<br/>         Enthalpy correction: 0.474379 hartree<br/>         Free Energy correction: 0.376180 hartree<br/>         Quasiharmonic Free Energy correction: 0.385490 hartree</p> <p>SCF Energy: -1301.184052 hartree<br/>         SCF Energy + ZPVE: -1300.741059 hartree<br/>         Enthalpy: -1300.709673 hartree<br/>         Free Energy: -1300.807872 hartree</p> <p>Free Energy with quasiharmonic correction: -1300.798561 hartree<br/>         (correction: 5.84 kcal/mol)</p> <p><b>B3LYP-D3/6-311+G(d,p)</b></p> <p>SCF Done: E(RB3LYP) = -1301.64310444 A.U.</p>                                                                                                                                                                                                                                                                                                                                                                                                                                                                                                                                                                                                                                                                                                                                                                                                                                                                                                                                                                                                                                                                                                                                                                                                                                                                                                                               |          |          |         |          |   |          |          |          |   |          |         |          |   |          |          |         |   |          |          |         |   |          |          |         |   |          |          |         |   |          |         |          |   |          |         |          |   |          |          |         |   |          |          |         |   |          |         |          |   |          |         |          |   |          |          |          |   |          |          |          |   |          |          |         |   |          |         |          |   |          |          |         |   |          |          |         |   |          |          |         |   |          |          |         |   |         |         |          |   |         |         |         |   |         |         |         |   |         |         |          |   |          |         |          |   |         |         |          |
| Cartesian<br>Coordinates                       | <p>54</p> <p>spD3-TS2-T1.out Energy: -816793.3732947</p> <table> <tbody> <tr><td>O</td><td>0.24807</td><td>1.79651</td><td>-1.42791</td></tr> <tr><td>C</td><td>-6.90586</td><td>-0.01382</td><td>-0.33718</td></tr> <tr><td>O</td><td>-6.29063</td><td>0.97775</td><td>-0.70198</td></tr> <tr><td>O</td><td>-6.36334</td><td>-1.14162</td><td>0.09419</td></tr> <tr><td>C</td><td>-2.67340</td><td>-1.81168</td><td>0.42447</td></tr> <tr><td>C</td><td>-1.48029</td><td>-1.16422</td><td>0.20541</td></tr> <tr><td>N</td><td>-3.71914</td><td>-0.97351</td><td>0.07178</td></tr> <tr><td>C</td><td>-3.16312</td><td>0.15205</td><td>-0.35364</td></tr> <tr><td>N</td><td>-1.81594</td><td>0.07971</td><td>-0.28880</td></tr> <tr><td>H</td><td>-0.43905</td><td>-1.45461</td><td>0.32583</td></tr> <tr><td>H</td><td>-5.32227</td><td>-1.08004</td><td>0.08571</td></tr> <tr><td>H</td><td>-1.14204</td><td>0.80543</td><td>-0.55460</td></tr> <tr><td>H</td><td>-3.71984</td><td>1.01023</td><td>-0.70178</td></tr> <tr><td>C</td><td>-8.42576</td><td>-0.07995</td><td>-0.33231</td></tr> <tr><td>H</td><td>-8.76658</td><td>-0.90528</td><td>-0.96720</td></tr> <tr><td>H</td><td>-8.78848</td><td>-0.28158</td><td>0.68173</td></tr> <tr><td>H</td><td>-8.84134</td><td>0.86222</td><td>-0.69408</td></tr> <tr><td>C</td><td>-2.90955</td><td>-3.19266</td><td>0.95154</td></tr> <tr><td>H</td><td>-3.49871</td><td>-3.17819</td><td>1.87826</td></tr> <tr><td>H</td><td>-3.45987</td><td>-3.81214</td><td>0.23099</td></tr> <tr><td>H</td><td>-1.95671</td><td>-3.68750</td><td>1.16410</td></tr> <tr><td>C</td><td>1.41826</td><td>0.93311</td><td>-1.28118</td></tr> <tr><td>C</td><td>1.71190</td><td>1.64941</td><td>1.20907</td></tr> <tr><td>O</td><td>2.36661</td><td>2.17157</td><td>2.10909</td></tr> <tr><td>C</td><td>0.48422</td><td>3.18718</td><td>-1.41344</td></tr> <tr><td>H</td><td>-0.49523</td><td>3.67554</td><td>-1.45884</td></tr> <tr><td>H</td><td>1.00095</td><td>3.51278</td><td>-0.50052</td></tr> </tbody> </table> | O        | 0.24807  | 1.79651 | -1.42791 | C | -6.90586 | -0.01382 | -0.33718 | O | -6.29063 | 0.97775 | -0.70198 | O | -6.36334 | -1.14162 | 0.09419 | C | -2.67340 | -1.81168 | 0.42447 | C | -1.48029 | -1.16422 | 0.20541 | N | -3.71914 | -0.97351 | 0.07178 | C | -3.16312 | 0.15205 | -0.35364 | N | -1.81594 | 0.07971 | -0.28880 | H | -0.43905 | -1.45461 | 0.32583 | H | -5.32227 | -1.08004 | 0.08571 | H | -1.14204 | 0.80543 | -0.55460 | H | -3.71984 | 1.01023 | -0.70178 | C | -8.42576 | -0.07995 | -0.33231 | H | -8.76658 | -0.90528 | -0.96720 | H | -8.78848 | -0.28158 | 0.68173 | H | -8.84134 | 0.86222 | -0.69408 | C | -2.90955 | -3.19266 | 0.95154 | H | -3.49871 | -3.17819 | 1.87826 | H | -3.45987 | -3.81214 | 0.23099 | H | -1.95671 | -3.68750 | 1.16410 | C | 1.41826 | 0.93311 | -1.28118 | C | 1.71190 | 1.64941 | 1.20907 | O | 2.36661 | 2.17157 | 2.10909 | C | 0.48422 | 3.18718 | -1.41344 | H | -0.49523 | 3.67554 | -1.45884 | H | 1.00095 | 3.51278 | -0.50052 |
| O                                              | 0.24807                                                                                                                                                                                                                                                                                                                                                                                                                                                                                                                                                                                                                                                                                                                                                                                                                                                                                                                                                                                                                                                                                                                                                                                                                                                                                                                                                                                                                                                                                                                                                                                                                                                                                                                                                                                                                                                                                                                                                                                                                                                 | 1.79651  | -1.42791 |         |          |   |          |          |          |   |          |         |          |   |          |          |         |   |          |          |         |   |          |          |         |   |          |          |         |   |          |         |          |   |          |         |          |   |          |          |         |   |          |          |         |   |          |         |          |   |          |         |          |   |          |          |          |   |          |          |          |   |          |          |         |   |          |         |          |   |          |          |         |   |          |          |         |   |          |          |         |   |          |          |         |   |         |         |          |   |         |         |         |   |         |         |         |   |         |         |          |   |          |         |          |   |         |         |          |
| C                                              | -6.90586                                                                                                                                                                                                                                                                                                                                                                                                                                                                                                                                                                                                                                                                                                                                                                                                                                                                                                                                                                                                                                                                                                                                                                                                                                                                                                                                                                                                                                                                                                                                                                                                                                                                                                                                                                                                                                                                                                                                                                                                                                                | -0.01382 | -0.33718 |         |          |   |          |          |          |   |          |         |          |   |          |          |         |   |          |          |         |   |          |          |         |   |          |          |         |   |          |         |          |   |          |         |          |   |          |          |         |   |          |          |         |   |          |         |          |   |          |         |          |   |          |          |          |   |          |          |          |   |          |          |         |   |          |         |          |   |          |          |         |   |          |          |         |   |          |          |         |   |          |          |         |   |         |         |          |   |         |         |         |   |         |         |         |   |         |         |          |   |          |         |          |   |         |         |          |
| O                                              | -6.29063                                                                                                                                                                                                                                                                                                                                                                                                                                                                                                                                                                                                                                                                                                                                                                                                                                                                                                                                                                                                                                                                                                                                                                                                                                                                                                                                                                                                                                                                                                                                                                                                                                                                                                                                                                                                                                                                                                                                                                                                                                                | 0.97775  | -0.70198 |         |          |   |          |          |          |   |          |         |          |   |          |          |         |   |          |          |         |   |          |          |         |   |          |          |         |   |          |         |          |   |          |         |          |   |          |          |         |   |          |          |         |   |          |         |          |   |          |         |          |   |          |          |          |   |          |          |          |   |          |          |         |   |          |         |          |   |          |          |         |   |          |          |         |   |          |          |         |   |          |          |         |   |         |         |          |   |         |         |         |   |         |         |         |   |         |         |          |   |          |         |          |   |         |         |          |
| O                                              | -6.36334                                                                                                                                                                                                                                                                                                                                                                                                                                                                                                                                                                                                                                                                                                                                                                                                                                                                                                                                                                                                                                                                                                                                                                                                                                                                                                                                                                                                                                                                                                                                                                                                                                                                                                                                                                                                                                                                                                                                                                                                                                                | -1.14162 | 0.09419  |         |          |   |          |          |          |   |          |         |          |   |          |          |         |   |          |          |         |   |          |          |         |   |          |          |         |   |          |         |          |   |          |         |          |   |          |          |         |   |          |          |         |   |          |         |          |   |          |         |          |   |          |          |          |   |          |          |          |   |          |          |         |   |          |         |          |   |          |          |         |   |          |          |         |   |          |          |         |   |          |          |         |   |         |         |          |   |         |         |         |   |         |         |         |   |         |         |          |   |          |         |          |   |         |         |          |
| C                                              | -2.67340                                                                                                                                                                                                                                                                                                                                                                                                                                                                                                                                                                                                                                                                                                                                                                                                                                                                                                                                                                                                                                                                                                                                                                                                                                                                                                                                                                                                                                                                                                                                                                                                                                                                                                                                                                                                                                                                                                                                                                                                                                                | -1.81168 | 0.42447  |         |          |   |          |          |          |   |          |         |          |   |          |          |         |   |          |          |         |   |          |          |         |   |          |          |         |   |          |         |          |   |          |         |          |   |          |          |         |   |          |          |         |   |          |         |          |   |          |         |          |   |          |          |          |   |          |          |          |   |          |          |         |   |          |         |          |   |          |          |         |   |          |          |         |   |          |          |         |   |          |          |         |   |         |         |          |   |         |         |         |   |         |         |         |   |         |         |          |   |          |         |          |   |         |         |          |
| C                                              | -1.48029                                                                                                                                                                                                                                                                                                                                                                                                                                                                                                                                                                                                                                                                                                                                                                                                                                                                                                                                                                                                                                                                                                                                                                                                                                                                                                                                                                                                                                                                                                                                                                                                                                                                                                                                                                                                                                                                                                                                                                                                                                                | -1.16422 | 0.20541  |         |          |   |          |          |          |   |          |         |          |   |          |          |         |   |          |          |         |   |          |          |         |   |          |          |         |   |          |         |          |   |          |         |          |   |          |          |         |   |          |          |         |   |          |         |          |   |          |         |          |   |          |          |          |   |          |          |          |   |          |          |         |   |          |         |          |   |          |          |         |   |          |          |         |   |          |          |         |   |          |          |         |   |         |         |          |   |         |         |         |   |         |         |         |   |         |         |          |   |          |         |          |   |         |         |          |
| N                                              | -3.71914                                                                                                                                                                                                                                                                                                                                                                                                                                                                                                                                                                                                                                                                                                                                                                                                                                                                                                                                                                                                                                                                                                                                                                                                                                                                                                                                                                                                                                                                                                                                                                                                                                                                                                                                                                                                                                                                                                                                                                                                                                                | -0.97351 | 0.07178  |         |          |   |          |          |          |   |          |         |          |   |          |          |         |   |          |          |         |   |          |          |         |   |          |          |         |   |          |         |          |   |          |         |          |   |          |          |         |   |          |          |         |   |          |         |          |   |          |         |          |   |          |          |          |   |          |          |          |   |          |          |         |   |          |         |          |   |          |          |         |   |          |          |         |   |          |          |         |   |          |          |         |   |         |         |          |   |         |         |         |   |         |         |         |   |         |         |          |   |          |         |          |   |         |         |          |
| C                                              | -3.16312                                                                                                                                                                                                                                                                                                                                                                                                                                                                                                                                                                                                                                                                                                                                                                                                                                                                                                                                                                                                                                                                                                                                                                                                                                                                                                                                                                                                                                                                                                                                                                                                                                                                                                                                                                                                                                                                                                                                                                                                                                                | 0.15205  | -0.35364 |         |          |   |          |          |          |   |          |         |          |   |          |          |         |   |          |          |         |   |          |          |         |   |          |          |         |   |          |         |          |   |          |         |          |   |          |          |         |   |          |          |         |   |          |         |          |   |          |         |          |   |          |          |          |   |          |          |          |   |          |          |         |   |          |         |          |   |          |          |         |   |          |          |         |   |          |          |         |   |          |          |         |   |         |         |          |   |         |         |         |   |         |         |         |   |         |         |          |   |          |         |          |   |         |         |          |
| N                                              | -1.81594                                                                                                                                                                                                                                                                                                                                                                                                                                                                                                                                                                                                                                                                                                                                                                                                                                                                                                                                                                                                                                                                                                                                                                                                                                                                                                                                                                                                                                                                                                                                                                                                                                                                                                                                                                                                                                                                                                                                                                                                                                                | 0.07971  | -0.28880 |         |          |   |          |          |          |   |          |         |          |   |          |          |         |   |          |          |         |   |          |          |         |   |          |          |         |   |          |         |          |   |          |         |          |   |          |          |         |   |          |          |         |   |          |         |          |   |          |         |          |   |          |          |          |   |          |          |          |   |          |          |         |   |          |         |          |   |          |          |         |   |          |          |         |   |          |          |         |   |          |          |         |   |         |         |          |   |         |         |         |   |         |         |         |   |         |         |          |   |          |         |          |   |         |         |          |
| H                                              | -0.43905                                                                                                                                                                                                                                                                                                                                                                                                                                                                                                                                                                                                                                                                                                                                                                                                                                                                                                                                                                                                                                                                                                                                                                                                                                                                                                                                                                                                                                                                                                                                                                                                                                                                                                                                                                                                                                                                                                                                                                                                                                                | -1.45461 | 0.32583  |         |          |   |          |          |          |   |          |         |          |   |          |          |         |   |          |          |         |   |          |          |         |   |          |          |         |   |          |         |          |   |          |         |          |   |          |          |         |   |          |          |         |   |          |         |          |   |          |         |          |   |          |          |          |   |          |          |          |   |          |          |         |   |          |         |          |   |          |          |         |   |          |          |         |   |          |          |         |   |          |          |         |   |         |         |          |   |         |         |         |   |         |         |         |   |         |         |          |   |          |         |          |   |         |         |          |
| H                                              | -5.32227                                                                                                                                                                                                                                                                                                                                                                                                                                                                                                                                                                                                                                                                                                                                                                                                                                                                                                                                                                                                                                                                                                                                                                                                                                                                                                                                                                                                                                                                                                                                                                                                                                                                                                                                                                                                                                                                                                                                                                                                                                                | -1.08004 | 0.08571  |         |          |   |          |          |          |   |          |         |          |   |          |          |         |   |          |          |         |   |          |          |         |   |          |          |         |   |          |         |          |   |          |         |          |   |          |          |         |   |          |          |         |   |          |         |          |   |          |         |          |   |          |          |          |   |          |          |          |   |          |          |         |   |          |         |          |   |          |          |         |   |          |          |         |   |          |          |         |   |          |          |         |   |         |         |          |   |         |         |         |   |         |         |         |   |         |         |          |   |          |         |          |   |         |         |          |
| H                                              | -1.14204                                                                                                                                                                                                                                                                                                                                                                                                                                                                                                                                                                                                                                                                                                                                                                                                                                                                                                                                                                                                                                                                                                                                                                                                                                                                                                                                                                                                                                                                                                                                                                                                                                                                                                                                                                                                                                                                                                                                                                                                                                                | 0.80543  | -0.55460 |         |          |   |          |          |          |   |          |         |          |   |          |          |         |   |          |          |         |   |          |          |         |   |          |          |         |   |          |         |          |   |          |         |          |   |          |          |         |   |          |          |         |   |          |         |          |   |          |         |          |   |          |          |          |   |          |          |          |   |          |          |         |   |          |         |          |   |          |          |         |   |          |          |         |   |          |          |         |   |          |          |         |   |         |         |          |   |         |         |         |   |         |         |         |   |         |         |          |   |          |         |          |   |         |         |          |
| H                                              | -3.71984                                                                                                                                                                                                                                                                                                                                                                                                                                                                                                                                                                                                                                                                                                                                                                                                                                                                                                                                                                                                                                                                                                                                                                                                                                                                                                                                                                                                                                                                                                                                                                                                                                                                                                                                                                                                                                                                                                                                                                                                                                                | 1.01023  | -0.70178 |         |          |   |          |          |          |   |          |         |          |   |          |          |         |   |          |          |         |   |          |          |         |   |          |          |         |   |          |         |          |   |          |         |          |   |          |          |         |   |          |          |         |   |          |         |          |   |          |         |          |   |          |          |          |   |          |          |          |   |          |          |         |   |          |         |          |   |          |          |         |   |          |          |         |   |          |          |         |   |          |          |         |   |         |         |          |   |         |         |         |   |         |         |         |   |         |         |          |   |          |         |          |   |         |         |          |
| C                                              | -8.42576                                                                                                                                                                                                                                                                                                                                                                                                                                                                                                                                                                                                                                                                                                                                                                                                                                                                                                                                                                                                                                                                                                                                                                                                                                                                                                                                                                                                                                                                                                                                                                                                                                                                                                                                                                                                                                                                                                                                                                                                                                                | -0.07995 | -0.33231 |         |          |   |          |          |          |   |          |         |          |   |          |          |         |   |          |          |         |   |          |          |         |   |          |          |         |   |          |         |          |   |          |         |          |   |          |          |         |   |          |          |         |   |          |         |          |   |          |         |          |   |          |          |          |   |          |          |          |   |          |          |         |   |          |         |          |   |          |          |         |   |          |          |         |   |          |          |         |   |          |          |         |   |         |         |          |   |         |         |         |   |         |         |         |   |         |         |          |   |          |         |          |   |         |         |          |
| H                                              | -8.76658                                                                                                                                                                                                                                                                                                                                                                                                                                                                                                                                                                                                                                                                                                                                                                                                                                                                                                                                                                                                                                                                                                                                                                                                                                                                                                                                                                                                                                                                                                                                                                                                                                                                                                                                                                                                                                                                                                                                                                                                                                                | -0.90528 | -0.96720 |         |          |   |          |          |          |   |          |         |          |   |          |          |         |   |          |          |         |   |          |          |         |   |          |          |         |   |          |         |          |   |          |         |          |   |          |          |         |   |          |          |         |   |          |         |          |   |          |         |          |   |          |          |          |   |          |          |          |   |          |          |         |   |          |         |          |   |          |          |         |   |          |          |         |   |          |          |         |   |          |          |         |   |         |         |          |   |         |         |         |   |         |         |         |   |         |         |          |   |          |         |          |   |         |         |          |
| H                                              | -8.78848                                                                                                                                                                                                                                                                                                                                                                                                                                                                                                                                                                                                                                                                                                                                                                                                                                                                                                                                                                                                                                                                                                                                                                                                                                                                                                                                                                                                                                                                                                                                                                                                                                                                                                                                                                                                                                                                                                                                                                                                                                                | -0.28158 | 0.68173  |         |          |   |          |          |          |   |          |         |          |   |          |          |         |   |          |          |         |   |          |          |         |   |          |          |         |   |          |         |          |   |          |         |          |   |          |          |         |   |          |          |         |   |          |         |          |   |          |         |          |   |          |          |          |   |          |          |          |   |          |          |         |   |          |         |          |   |          |          |         |   |          |          |         |   |          |          |         |   |          |          |         |   |         |         |          |   |         |         |         |   |         |         |         |   |         |         |          |   |          |         |          |   |         |         |          |
| H                                              | -8.84134                                                                                                                                                                                                                                                                                                                                                                                                                                                                                                                                                                                                                                                                                                                                                                                                                                                                                                                                                                                                                                                                                                                                                                                                                                                                                                                                                                                                                                                                                                                                                                                                                                                                                                                                                                                                                                                                                                                                                                                                                                                | 0.86222  | -0.69408 |         |          |   |          |          |          |   |          |         |          |   |          |          |         |   |          |          |         |   |          |          |         |   |          |          |         |   |          |         |          |   |          |         |          |   |          |          |         |   |          |          |         |   |          |         |          |   |          |         |          |   |          |          |          |   |          |          |          |   |          |          |         |   |          |         |          |   |          |          |         |   |          |          |         |   |          |          |         |   |          |          |         |   |         |         |          |   |         |         |         |   |         |         |         |   |         |         |          |   |          |         |          |   |         |         |          |
| C                                              | -2.90955                                                                                                                                                                                                                                                                                                                                                                                                                                                                                                                                                                                                                                                                                                                                                                                                                                                                                                                                                                                                                                                                                                                                                                                                                                                                                                                                                                                                                                                                                                                                                                                                                                                                                                                                                                                                                                                                                                                                                                                                                                                | -3.19266 | 0.95154  |         |          |   |          |          |          |   |          |         |          |   |          |          |         |   |          |          |         |   |          |          |         |   |          |          |         |   |          |         |          |   |          |         |          |   |          |          |         |   |          |          |         |   |          |         |          |   |          |         |          |   |          |          |          |   |          |          |          |   |          |          |         |   |          |         |          |   |          |          |         |   |          |          |         |   |          |          |         |   |          |          |         |   |         |         |          |   |         |         |         |   |         |         |         |   |         |         |          |   |          |         |          |   |         |         |          |
| H                                              | -3.49871                                                                                                                                                                                                                                                                                                                                                                                                                                                                                                                                                                                                                                                                                                                                                                                                                                                                                                                                                                                                                                                                                                                                                                                                                                                                                                                                                                                                                                                                                                                                                                                                                                                                                                                                                                                                                                                                                                                                                                                                                                                | -3.17819 | 1.87826  |         |          |   |          |          |          |   |          |         |          |   |          |          |         |   |          |          |         |   |          |          |         |   |          |          |         |   |          |         |          |   |          |         |          |   |          |          |         |   |          |          |         |   |          |         |          |   |          |         |          |   |          |          |          |   |          |          |          |   |          |          |         |   |          |         |          |   |          |          |         |   |          |          |         |   |          |          |         |   |          |          |         |   |         |         |          |   |         |         |         |   |         |         |         |   |         |         |          |   |          |         |          |   |         |         |          |
| H                                              | -3.45987                                                                                                                                                                                                                                                                                                                                                                                                                                                                                                                                                                                                                                                                                                                                                                                                                                                                                                                                                                                                                                                                                                                                                                                                                                                                                                                                                                                                                                                                                                                                                                                                                                                                                                                                                                                                                                                                                                                                                                                                                                                | -3.81214 | 0.23099  |         |          |   |          |          |          |   |          |         |          |   |          |          |         |   |          |          |         |   |          |          |         |   |          |          |         |   |          |         |          |   |          |         |          |   |          |          |         |   |          |          |         |   |          |         |          |   |          |         |          |   |          |          |          |   |          |          |          |   |          |          |         |   |          |         |          |   |          |          |         |   |          |          |         |   |          |          |         |   |          |          |         |   |         |         |          |   |         |         |         |   |         |         |         |   |         |         |          |   |          |         |          |   |         |         |          |
| H                                              | -1.95671                                                                                                                                                                                                                                                                                                                                                                                                                                                                                                                                                                                                                                                                                                                                                                                                                                                                                                                                                                                                                                                                                                                                                                                                                                                                                                                                                                                                                                                                                                                                                                                                                                                                                                                                                                                                                                                                                                                                                                                                                                                | -3.68750 | 1.16410  |         |          |   |          |          |          |   |          |         |          |   |          |          |         |   |          |          |         |   |          |          |         |   |          |          |         |   |          |         |          |   |          |         |          |   |          |          |         |   |          |          |         |   |          |         |          |   |          |         |          |   |          |          |          |   |          |          |          |   |          |          |         |   |          |         |          |   |          |          |         |   |          |          |         |   |          |          |         |   |          |          |         |   |         |         |          |   |         |         |         |   |         |         |         |   |         |         |          |   |          |         |          |   |         |         |          |
| C                                              | 1.41826                                                                                                                                                                                                                                                                                                                                                                                                                                                                                                                                                                                                                                                                                                                                                                                                                                                                                                                                                                                                                                                                                                                                                                                                                                                                                                                                                                                                                                                                                                                                                                                                                                                                                                                                                                                                                                                                                                                                                                                                                                                 | 0.93311  | -1.28118 |         |          |   |          |          |          |   |          |         |          |   |          |          |         |   |          |          |         |   |          |          |         |   |          |          |         |   |          |         |          |   |          |         |          |   |          |          |         |   |          |          |         |   |          |         |          |   |          |         |          |   |          |          |          |   |          |          |          |   |          |          |         |   |          |         |          |   |          |          |         |   |          |          |         |   |          |          |         |   |          |          |         |   |         |         |          |   |         |         |         |   |         |         |         |   |         |         |          |   |          |         |          |   |         |         |          |
| C                                              | 1.71190                                                                                                                                                                                                                                                                                                                                                                                                                                                                                                                                                                                                                                                                                                                                                                                                                                                                                                                                                                                                                                                                                                                                                                                                                                                                                                                                                                                                                                                                                                                                                                                                                                                                                                                                                                                                                                                                                                                                                                                                                                                 | 1.64941  | 1.20907  |         |          |   |          |          |          |   |          |         |          |   |          |          |         |   |          |          |         |   |          |          |         |   |          |          |         |   |          |         |          |   |          |         |          |   |          |          |         |   |          |          |         |   |          |         |          |   |          |         |          |   |          |          |          |   |          |          |          |   |          |          |         |   |          |         |          |   |          |          |         |   |          |          |         |   |          |          |         |   |          |          |         |   |         |         |          |   |         |         |         |   |         |         |         |   |         |         |          |   |          |         |          |   |         |         |          |
| O                                              | 2.36661                                                                                                                                                                                                                                                                                                                                                                                                                                                                                                                                                                                                                                                                                                                                                                                                                                                                                                                                                                                                                                                                                                                                                                                                                                                                                                                                                                                                                                                                                                                                                                                                                                                                                                                                                                                                                                                                                                                                                                                                                                                 | 2.17157  | 2.10909  |         |          |   |          |          |          |   |          |         |          |   |          |          |         |   |          |          |         |   |          |          |         |   |          |          |         |   |          |         |          |   |          |         |          |   |          |          |         |   |          |          |         |   |          |         |          |   |          |         |          |   |          |          |          |   |          |          |          |   |          |          |         |   |          |         |          |   |          |          |         |   |          |          |         |   |          |          |         |   |          |          |         |   |         |         |          |   |         |         |         |   |         |         |         |   |         |         |          |   |          |         |          |   |         |         |          |
| C                                              | 0.48422                                                                                                                                                                                                                                                                                                                                                                                                                                                                                                                                                                                                                                                                                                                                                                                                                                                                                                                                                                                                                                                                                                                                                                                                                                                                                                                                                                                                                                                                                                                                                                                                                                                                                                                                                                                                                                                                                                                                                                                                                                                 | 3.18718  | -1.41344 |         |          |   |          |          |          |   |          |         |          |   |          |          |         |   |          |          |         |   |          |          |         |   |          |          |         |   |          |         |          |   |          |         |          |   |          |          |         |   |          |          |         |   |          |         |          |   |          |         |          |   |          |          |          |   |          |          |          |   |          |          |         |   |          |         |          |   |          |          |         |   |          |          |         |   |          |          |         |   |          |          |         |   |         |         |          |   |         |         |         |   |         |         |         |   |         |         |          |   |          |         |          |   |         |         |          |
| H                                              | -0.49523                                                                                                                                                                                                                                                                                                                                                                                                                                                                                                                                                                                                                                                                                                                                                                                                                                                                                                                                                                                                                                                                                                                                                                                                                                                                                                                                                                                                                                                                                                                                                                                                                                                                                                                                                                                                                                                                                                                                                                                                                                                | 3.67554  | -1.45884 |         |          |   |          |          |          |   |          |         |          |   |          |          |         |   |          |          |         |   |          |          |         |   |          |          |         |   |          |         |          |   |          |         |          |   |          |          |         |   |          |          |         |   |          |         |          |   |          |         |          |   |          |          |          |   |          |          |          |   |          |          |         |   |          |         |          |   |          |          |         |   |          |          |         |   |          |          |         |   |          |          |         |   |         |         |          |   |         |         |         |   |         |         |         |   |         |         |          |   |          |         |          |   |         |         |          |
| H                                              | 1.00095                                                                                                                                                                                                                                                                                                                                                                                                                                                                                                                                                                                                                                                                                                                                                                                                                                                                                                                                                                                                                                                                                                                                                                                                                                                                                                                                                                                                                                                                                                                                                                                                                                                                                                                                                                                                                                                                                                                                                                                                                                                 | 3.51278  | -0.50052 |         |          |   |          |          |          |   |          |         |          |   |          |          |         |   |          |          |         |   |          |          |         |   |          |          |         |   |          |         |          |   |          |         |          |   |          |          |         |   |          |          |         |   |          |         |          |   |          |         |          |   |          |          |          |   |          |          |          |   |          |          |         |   |          |         |          |   |          |          |         |   |          |          |         |   |          |          |         |   |          |          |         |   |         |         |          |   |         |         |         |   |         |         |         |   |         |         |          |   |          |         |          |   |         |         |          |

|   |          |          |          |
|---|----------|----------|----------|
| H | 1.07500  | 3.51590  | -2.28250 |
| C | 2.24769  | 1.11316  | -0.03010 |
| H | 3.23548  | 1.53618  | -0.20408 |
| C | 2.56079  | -0.78243 | 0.53124  |
| C | 4.03466  | -0.94899 | 0.18568  |
| H | 2.45753  | -0.58733 | 1.62081  |
| O | 1.71771  | -1.56014 | -0.02941 |
| C | 4.40736  | -1.86139 | -0.80758 |
| C | 5.03969  | -0.24956 | 0.87045  |
| C | 5.75289  | -2.06105 | -1.12454 |
| H | 3.61051  | -2.40938 | -1.30263 |
| C | 6.38399  | -0.44998 | 0.55914  |
| H | 4.75115  | 0.46588  | 1.63874  |
| C | 6.74802  | -1.35697 | -0.44266 |
| H | 6.02786  | -2.77428 | -1.90029 |
| H | 7.15287  | 0.10159  | 1.09773  |
| H | 7.79744  | -1.51458 | -0.68441 |
| O | 0.36581  | 1.40820  | 1.37657  |
| C | -0.15949 | 1.75382  | 2.65404  |
| H | -0.06116 | 2.82796  | 2.84808  |
| H | -1.21356 | 1.46891  | 2.62664  |
| H | 0.35784  | 1.21364  | 3.45358  |
| H | 0.97113  | -0.06933 | -1.23007 |
| C | 2.28439  | 0.98829  | -2.54210 |
| H | 3.03517  | 0.19262  | -2.49609 |
| H | 2.81685  | 1.94267  | -2.64214 |
| H | 1.66844  | 0.83517  | -3.43592 |

Optimized Molecular Properties for **T1-INT2**

|                                                |                                                                                                                                                                                                                                                                                                                                                                                                                                                                                                                                                                                                                                                                                                                           |                         |          |
|------------------------------------------------|---------------------------------------------------------------------------------------------------------------------------------------------------------------------------------------------------------------------------------------------------------------------------------------------------------------------------------------------------------------------------------------------------------------------------------------------------------------------------------------------------------------------------------------------------------------------------------------------------------------------------------------------------------------------------------------------------------------------------|-------------------------|----------|
| Number of<br>(-)<br>Vibrational<br>Frequencies | 0                                                                                                                                                                                                                                                                                                                                                                                                                                                                                                                                                                                                                                                                                                                         |                         |          |
| Absolute<br>Energies<br>(Hartrees)             | <p><b>B3LYP/6-31G(d)</b></p> <p>There are 15 positive frequencies below 100 cm<sup>-1</sup>.</p> <p>Zero-point correction: 0.443779 hartree<br/>         Enthalpy correction: 0.475509 hartree<br/>         Free Energy correction: 0.376306 hartree<br/>         Quasiharmonic Free Energy correction: 0.386283 hartree</p> <p>SCF Energy: -1301.184548 hartree<br/>         SCF Energy + ZPVE: -1300.740769 hartree<br/>         Enthalpy: -1300.709039 hartree<br/>         Free Energy: -1300.808242 hartree</p> <p>Free Energy with quasiharmonic correction: -1300.798265 hartree<br/>         (correction: 6.26 kcal/mol)</p> <p><b>B3LYP-D3/6-311+G(d,p)</b></p> <p>SCF Done: E(RB3LYP) = -1301.64371808 A.U.</p> |                         |          |
| Cartesian<br>Coordinates                       | 54<br>spD3-INT2-T1.out                                                                                                                                                                                                                                                                                                                                                                                                                                                                                                                                                                                                                                                                                                    | Energy: -816793.7583596 |          |
|                                                | O 0.33504                                                                                                                                                                                                                                                                                                                                                                                                                                                                                                                                                                                                                                                                                                                 | 1.75901                 | -1.42098 |
|                                                | C -6.87205                                                                                                                                                                                                                                                                                                                                                                                                                                                                                                                                                                                                                                                                                                                | -0.11557                | -0.50257 |
|                                                | O -6.26154                                                                                                                                                                                                                                                                                                                                                                                                                                                                                                                                                                                                                                                                                                                | 0.84366                 | -0.95264 |
|                                                | O -6.32736                                                                                                                                                                                                                                                                                                                                                                                                                                                                                                                                                                                                                                                                                                                | -1.17298                | 0.07719  |
|                                                | C -2.64680                                                                                                                                                                                                                                                                                                                                                                                                                                                                                                                                                                                                                                                                                                                | -1.71385                | 0.63919  |
|                                                | C -1.45622                                                                                                                                                                                                                                                                                                                                                                                                                                                                                                                                                                                                                                                                                                                | -1.06973                | 0.39682  |
|                                                | N -3.69237                                                                                                                                                                                                                                                                                                                                                                                                                                                                                                                                                                                                                                                                                                                | -0.94764                | 0.14623  |
|                                                | C -3.14006                                                                                                                                                                                                                                                                                                                                                                                                                                                                                                                                                                                                                                                                                                                | 0.13323                 | -0.38513 |
|                                                | N -1.79560                                                                                                                                                                                                                                                                                                                                                                                                                                                                                                                                                                                                                                                                                                                | 0.09965                 | -0.25442 |
|                                                | H -0.40976                                                                                                                                                                                                                                                                                                                                                                                                                                                                                                                                                                                                                                                                                                                | -1.31102                | 0.58964  |
|                                                | H -5.28637                                                                                                                                                                                                                                                                                                                                                                                                                                                                                                                                                                                                                                                                                                                | -1.08877                | 0.10539  |
|                                                | H -1.12398                                                                                                                                                                                                                                                                                                                                                                                                                                                                                                                                                                                                                                                                                                                | 0.80483                 | -0.56917 |
|                                                | H -3.69693                                                                                                                                                                                                                                                                                                                                                                                                                                                                                                                                                                                                                                                                                                                | 0.93139                 | -0.85478 |
|                                                | C -8.38923                                                                                                                                                                                                                                                                                                                                                                                                                                                                                                                                                                                                                                                                                                                | -0.21857                | -0.55523 |
|                                                | H -8.68385                                                                                                                                                                                                                                                                                                                                                                                                                                                                                                                                                                                                                                                                                                                | -1.11118                | -1.11829 |
|                                                | H -8.79302                                                                                                                                                                                                                                                                                                                                                                                                                                                                                                                                                                                                                                                                                                                | -0.32781                | 0.45737  |
|                                                | H -8.80759                                                                                                                                                                                                                                                                                                                                                                                                                                                                                                                                                                                                                                                                                                                | 0.67189                 | -1.02786 |
|                                                | C -2.88124                                                                                                                                                                                                                                                                                                                                                                                                                                                                                                                                                                                                                                                                                                                | -3.02978                | 1.31326  |
|                                                | H -3.51414                                                                                                                                                                                                                                                                                                                                                                                                                                                                                                                                                                                                                                                                                                                | -2.92270                | 2.20453  |
|                                                | H -3.38453                                                                                                                                                                                                                                                                                                                                                                                                                                                                                                                                                                                                                                                                                                                | -3.74247                | 0.64633  |
|                                                | H -1.92972                                                                                                                                                                                                                                                                                                                                                                                                                                                                                                                                                                                                                                                                                                                | -3.47225                | 1.62403  |
|                                                | C 1.47284                                                                                                                                                                                                                                                                                                                                                                                                                                                                                                                                                                                                                                                                                                                 | 0.86989                 | -1.24126 |
|                                                | C 1.66890                                                                                                                                                                                                                                                                                                                                                                                                                                                                                                                                                                                                                                                                                                                 | 1.78490                 | 1.18589  |
|                                                | O 2.26222                                                                                                                                                                                                                                                                                                                                                                                                                                                                                                                                                                                                                                                                                                                 | 2.54879                 | 1.93603  |
|                                                | C 0.61453                                                                                                                                                                                                                                                                                                                                                                                                                                                                                                                                                                                                                                                                                                                 | 3.13963                 | -1.51731 |
|                                                | H -0.35037                                                                                                                                                                                                                                                                                                                                                                                                                                                                                                                                                                                                                                                                                                                | 3.65548                 | -1.56553 |
|                                                | H 1.17224                                                                                                                                                                                                                                                                                                                                                                                                                                                                                                                                                                                                                                                                                                                 | 3.51627                 | -0.64843 |

|   |          |          |          |
|---|----------|----------|----------|
| H | 1.18389  | 3.38453  | -2.42672 |
| C | 2.28060  | 1.05897  | 0.04602  |
| H | 3.24033  | 1.54525  | -0.14049 |
| C | 2.57974  | -0.55829 | 0.66035  |
| C | 4.01336  | -0.91202 | 0.20263  |
| H | 2.66279  | -0.34665 | 1.75919  |
| O | 1.65615  | -1.40872 | 0.30400  |
| C | 4.19585  | -2.00947 | -0.64438 |
| C | 5.14489  | -0.21245 | 0.64423  |
| C | 5.47423  | -2.38853 | -1.06088 |
| H | 3.29908  | -2.54715 | -0.94037 |
| C | 6.42531  | -0.58951 | 0.23636  |
| H | 5.01534  | 0.63429  | 1.31763  |
| C | 6.59589  | -1.67973 | -0.62333 |
| H | 5.59898  | -3.24492 | -1.72244 |
| H | 7.29343  | -0.03512 | 0.59014  |
| H | 7.59377  | -1.97602 | -0.94176 |
| O | 0.36984  | 1.43919  | 1.41199  |
| C | -0.21577 | 1.98201  | 2.59367  |
| H | -0.23675 | 3.07673  | 2.55760  |
| H | -1.23071 | 1.58203  | 2.62775  |
| H | 0.34465  | 1.67684  | 3.48290  |
| H | 1.00999  | -0.12035 | -1.14660 |
| C | 2.36652  | 0.87128  | -2.48218 |
| H | 3.09323  | 0.05657  | -2.40286 |
| H | 2.92922  | 1.80666  | -2.59657 |
| H | 1.76407  | 0.71346  | -3.38475 |

Optimized Molecular Properties for **T1-TS3**

|                                                |                                                                                                                                                                                                                                                                                                                                                                                                                                                                                                                                                                                                                                                                                                                                                                                                                                                                                                                                                                                                                                                                                                                                                                                                                                                                                                                                                                                                                                                                                                                                                                                                                                                                                                                                                                                                                                                                                                                                                                                                                                           |          |          |         |         |   |          |          |         |   |          |          |         |   |          |          |          |   |          |         |          |   |          |         |          |   |          |         |          |   |          |         |         |   |          |         |          |   |          |         |          |   |          |          |          |   |          |         |         |   |          |          |         |   |          |          |         |   |          |          |         |   |          |          |          |   |          |          |         |   |          |         |          |   |          |         |          |   |          |         |          |   |          |         |          |   |         |         |          |   |         |          |          |   |         |          |         |   |         |         |         |   |          |         |         |   |         |         |         |
|------------------------------------------------|-------------------------------------------------------------------------------------------------------------------------------------------------------------------------------------------------------------------------------------------------------------------------------------------------------------------------------------------------------------------------------------------------------------------------------------------------------------------------------------------------------------------------------------------------------------------------------------------------------------------------------------------------------------------------------------------------------------------------------------------------------------------------------------------------------------------------------------------------------------------------------------------------------------------------------------------------------------------------------------------------------------------------------------------------------------------------------------------------------------------------------------------------------------------------------------------------------------------------------------------------------------------------------------------------------------------------------------------------------------------------------------------------------------------------------------------------------------------------------------------------------------------------------------------------------------------------------------------------------------------------------------------------------------------------------------------------------------------------------------------------------------------------------------------------------------------------------------------------------------------------------------------------------------------------------------------------------------------------------------------------------------------------------------------|----------|----------|---------|---------|---|----------|----------|---------|---|----------|----------|---------|---|----------|----------|----------|---|----------|---------|----------|---|----------|---------|----------|---|----------|---------|----------|---|----------|---------|---------|---|----------|---------|----------|---|----------|---------|----------|---|----------|----------|----------|---|----------|---------|---------|---|----------|----------|---------|---|----------|----------|---------|---|----------|----------|---------|---|----------|----------|----------|---|----------|----------|---------|---|----------|---------|----------|---|----------|---------|----------|---|----------|---------|----------|---|----------|---------|----------|---|---------|---------|----------|---|---------|----------|----------|---|---------|----------|---------|---|---------|---------|---------|---|----------|---------|---------|---|---------|---------|---------|
| Number of<br>(-)<br>Vibrational<br>Frequencies | 1 (-1536.2286)                                                                                                                                                                                                                                                                                                                                                                                                                                                                                                                                                                                                                                                                                                                                                                                                                                                                                                                                                                                                                                                                                                                                                                                                                                                                                                                                                                                                                                                                                                                                                                                                                                                                                                                                                                                                                                                                                                                                                                                                                            |          |          |         |         |   |          |          |         |   |          |          |         |   |          |          |          |   |          |         |          |   |          |         |          |   |          |         |          |   |          |         |         |   |          |         |          |   |          |         |          |   |          |          |          |   |          |         |         |   |          |          |         |   |          |          |         |   |          |          |         |   |          |          |          |   |          |          |         |   |          |         |          |   |          |         |          |   |          |         |          |   |          |         |          |   |         |         |          |   |         |          |          |   |         |          |         |   |         |         |         |   |          |         |         |   |         |         |         |
| Absolute<br>Energies<br>(Hartrees)             | <p><b>B3LYP/6-31G(d)</b></p> <p>There are 14 positive frequencies below 100 cm<sup>-1</sup>.</p> <p>Zero-point correction: 0.439227 hartree<br/>         Enthalpy correction: 0.470730 hartree<br/>         Free Energy correction: 0.369631 hartree<br/>         Quasiharmonic Free Energy correction: 0.382228 hartree</p> <p>SCF Energy: -1301.124063 hartree<br/>         SCF Energy + ZPVE: -1300.684836 hartree<br/>         Enthalpy: -1300.653333 hartree<br/>         Free Energy: -1300.754432 hartree</p> <p>Free Energy with quasiharmonic correction: -1300.741834 hartree<br/>         (correction: 7.90 kcal/mol)</p> <p><b>B3LYP-D3/6-311+G(d,p)</b></p> <p>SCF Done: E(RB3LYP) = -1301.58388694 A.U.</p>                                                                                                                                                                                                                                                                                                                                                                                                                                                                                                                                                                                                                                                                                                                                                                                                                                                                                                                                                                                                                                                                                                                                                                                                                                                                                                                 |          |          |         |         |   |          |          |         |   |          |          |         |   |          |          |          |   |          |         |          |   |          |         |          |   |          |         |          |   |          |         |         |   |          |         |          |   |          |         |          |   |          |          |          |   |          |         |         |   |          |          |         |   |          |          |         |   |          |          |         |   |          |          |          |   |          |          |         |   |          |         |          |   |          |         |          |   |          |         |          |   |          |         |          |   |         |         |          |   |         |          |          |   |         |          |         |   |         |         |         |   |          |         |         |   |         |         |         |
| Cartesian<br>Coordinates                       | <p>54<br/>         spD3-TS3-T1.out Energy: -816756.2137527</p> <table> <tr><td>O</td><td>0.16303</td><td>1.97962</td><td>0.61432</td></tr> <tr><td>C</td><td>-6.16650</td><td>-2.24378</td><td>0.35681</td></tr> <tr><td>O</td><td>-5.02101</td><td>-2.49445</td><td>0.69662</td></tr> <tr><td>O</td><td>-6.58007</td><td>-1.08419</td><td>-0.14246</td></tr> <tr><td>C</td><td>-4.33643</td><td>1.92694</td><td>-0.70893</td></tr> <tr><td>C</td><td>-3.01525</td><td>2.26885</td><td>-0.54545</td></tr> <tr><td>N</td><td>-4.51049</td><td>0.62036</td><td>-0.29365</td></tr> <tr><td>C</td><td>-3.31887</td><td>0.19479</td><td>0.10588</td></tr> <tr><td>N</td><td>-2.38423</td><td>1.15899</td><td>-0.03141</td></tr> <tr><td>H</td><td>-2.47288</td><td>3.18123</td><td>-0.74205</td></tr> <tr><td>H</td><td>-5.79202</td><td>-0.42515</td><td>-0.20332</td></tr> <tr><td>H</td><td>-1.37871</td><td>1.13430</td><td>0.20704</td></tr> <tr><td>H</td><td>-3.12835</td><td>-0.79352</td><td>0.49756</td></tr> <tr><td>C</td><td>-7.29999</td><td>-3.24975</td><td>0.46114</td></tr> <tr><td>H</td><td>-8.10018</td><td>-2.84877</td><td>1.09287</td></tr> <tr><td>H</td><td>-7.73047</td><td>-3.43204</td><td>-0.52972</td></tr> <tr><td>H</td><td>-6.92833</td><td>-4.18560</td><td>0.88141</td></tr> <tr><td>C</td><td>-5.47104</td><td>2.74951</td><td>-1.23458</td></tr> <tr><td>H</td><td>-5.91843</td><td>2.29391</td><td>-2.12724</td></tr> <tr><td>H</td><td>-6.27150</td><td>2.85227</td><td>-0.49074</td></tr> <tr><td>H</td><td>-5.13011</td><td>3.75466</td><td>-1.50419</td></tr> <tr><td>C</td><td>1.30749</td><td>1.76812</td><td>-0.28767</td></tr> <tr><td>C</td><td>1.72939</td><td>-0.72728</td><td>-0.01214</td></tr> <tr><td>O</td><td>2.34255</td><td>-1.78065</td><td>0.07299</td></tr> <tr><td>C</td><td>0.44718</td><td>2.07068</td><td>2.00310</td></tr> <tr><td>H</td><td>-0.42511</td><td>2.54892</td><td>2.46376</td></tr> <tr><td>H</td><td>0.59586</td><td>1.08208</td><td>2.45496</td></tr> </table> | O        | 0.16303  | 1.97962 | 0.61432 | C | -6.16650 | -2.24378 | 0.35681 | O | -5.02101 | -2.49445 | 0.69662 | O | -6.58007 | -1.08419 | -0.14246 | C | -4.33643 | 1.92694 | -0.70893 | C | -3.01525 | 2.26885 | -0.54545 | N | -4.51049 | 0.62036 | -0.29365 | C | -3.31887 | 0.19479 | 0.10588 | N | -2.38423 | 1.15899 | -0.03141 | H | -2.47288 | 3.18123 | -0.74205 | H | -5.79202 | -0.42515 | -0.20332 | H | -1.37871 | 1.13430 | 0.20704 | H | -3.12835 | -0.79352 | 0.49756 | C | -7.29999 | -3.24975 | 0.46114 | H | -8.10018 | -2.84877 | 1.09287 | H | -7.73047 | -3.43204 | -0.52972 | H | -6.92833 | -4.18560 | 0.88141 | C | -5.47104 | 2.74951 | -1.23458 | H | -5.91843 | 2.29391 | -2.12724 | H | -6.27150 | 2.85227 | -0.49074 | H | -5.13011 | 3.75466 | -1.50419 | C | 1.30749 | 1.76812 | -0.28767 | C | 1.72939 | -0.72728 | -0.01214 | O | 2.34255 | -1.78065 | 0.07299 | C | 0.44718 | 2.07068 | 2.00310 | H | -0.42511 | 2.54892 | 2.46376 | H | 0.59586 | 1.08208 | 2.45496 |
| O                                              | 0.16303                                                                                                                                                                                                                                                                                                                                                                                                                                                                                                                                                                                                                                                                                                                                                                                                                                                                                                                                                                                                                                                                                                                                                                                                                                                                                                                                                                                                                                                                                                                                                                                                                                                                                                                                                                                                                                                                                                                                                                                                                                   | 1.97962  | 0.61432  |         |         |   |          |          |         |   |          |          |         |   |          |          |          |   |          |         |          |   |          |         |          |   |          |         |          |   |          |         |         |   |          |         |          |   |          |         |          |   |          |          |          |   |          |         |         |   |          |          |         |   |          |          |         |   |          |          |         |   |          |          |          |   |          |          |         |   |          |         |          |   |          |         |          |   |          |         |          |   |          |         |          |   |         |         |          |   |         |          |          |   |         |          |         |   |         |         |         |   |          |         |         |   |         |         |         |
| C                                              | -6.16650                                                                                                                                                                                                                                                                                                                                                                                                                                                                                                                                                                                                                                                                                                                                                                                                                                                                                                                                                                                                                                                                                                                                                                                                                                                                                                                                                                                                                                                                                                                                                                                                                                                                                                                                                                                                                                                                                                                                                                                                                                  | -2.24378 | 0.35681  |         |         |   |          |          |         |   |          |          |         |   |          |          |          |   |          |         |          |   |          |         |          |   |          |         |          |   |          |         |         |   |          |         |          |   |          |         |          |   |          |          |          |   |          |         |         |   |          |          |         |   |          |          |         |   |          |          |         |   |          |          |          |   |          |          |         |   |          |         |          |   |          |         |          |   |          |         |          |   |          |         |          |   |         |         |          |   |         |          |          |   |         |          |         |   |         |         |         |   |          |         |         |   |         |         |         |
| O                                              | -5.02101                                                                                                                                                                                                                                                                                                                                                                                                                                                                                                                                                                                                                                                                                                                                                                                                                                                                                                                                                                                                                                                                                                                                                                                                                                                                                                                                                                                                                                                                                                                                                                                                                                                                                                                                                                                                                                                                                                                                                                                                                                  | -2.49445 | 0.69662  |         |         |   |          |          |         |   |          |          |         |   |          |          |          |   |          |         |          |   |          |         |          |   |          |         |          |   |          |         |         |   |          |         |          |   |          |         |          |   |          |          |          |   |          |         |         |   |          |          |         |   |          |          |         |   |          |          |         |   |          |          |          |   |          |          |         |   |          |         |          |   |          |         |          |   |          |         |          |   |          |         |          |   |         |         |          |   |         |          |          |   |         |          |         |   |         |         |         |   |          |         |         |   |         |         |         |
| O                                              | -6.58007                                                                                                                                                                                                                                                                                                                                                                                                                                                                                                                                                                                                                                                                                                                                                                                                                                                                                                                                                                                                                                                                                                                                                                                                                                                                                                                                                                                                                                                                                                                                                                                                                                                                                                                                                                                                                                                                                                                                                                                                                                  | -1.08419 | -0.14246 |         |         |   |          |          |         |   |          |          |         |   |          |          |          |   |          |         |          |   |          |         |          |   |          |         |          |   |          |         |         |   |          |         |          |   |          |         |          |   |          |          |          |   |          |         |         |   |          |          |         |   |          |          |         |   |          |          |         |   |          |          |          |   |          |          |         |   |          |         |          |   |          |         |          |   |          |         |          |   |          |         |          |   |         |         |          |   |         |          |          |   |         |          |         |   |         |         |         |   |          |         |         |   |         |         |         |
| C                                              | -4.33643                                                                                                                                                                                                                                                                                                                                                                                                                                                                                                                                                                                                                                                                                                                                                                                                                                                                                                                                                                                                                                                                                                                                                                                                                                                                                                                                                                                                                                                                                                                                                                                                                                                                                                                                                                                                                                                                                                                                                                                                                                  | 1.92694  | -0.70893 |         |         |   |          |          |         |   |          |          |         |   |          |          |          |   |          |         |          |   |          |         |          |   |          |         |          |   |          |         |         |   |          |         |          |   |          |         |          |   |          |          |          |   |          |         |         |   |          |          |         |   |          |          |         |   |          |          |         |   |          |          |          |   |          |          |         |   |          |         |          |   |          |         |          |   |          |         |          |   |          |         |          |   |         |         |          |   |         |          |          |   |         |          |         |   |         |         |         |   |          |         |         |   |         |         |         |
| C                                              | -3.01525                                                                                                                                                                                                                                                                                                                                                                                                                                                                                                                                                                                                                                                                                                                                                                                                                                                                                                                                                                                                                                                                                                                                                                                                                                                                                                                                                                                                                                                                                                                                                                                                                                                                                                                                                                                                                                                                                                                                                                                                                                  | 2.26885  | -0.54545 |         |         |   |          |          |         |   |          |          |         |   |          |          |          |   |          |         |          |   |          |         |          |   |          |         |          |   |          |         |         |   |          |         |          |   |          |         |          |   |          |          |          |   |          |         |         |   |          |          |         |   |          |          |         |   |          |          |         |   |          |          |          |   |          |          |         |   |          |         |          |   |          |         |          |   |          |         |          |   |          |         |          |   |         |         |          |   |         |          |          |   |         |          |         |   |         |         |         |   |          |         |         |   |         |         |         |
| N                                              | -4.51049                                                                                                                                                                                                                                                                                                                                                                                                                                                                                                                                                                                                                                                                                                                                                                                                                                                                                                                                                                                                                                                                                                                                                                                                                                                                                                                                                                                                                                                                                                                                                                                                                                                                                                                                                                                                                                                                                                                                                                                                                                  | 0.62036  | -0.29365 |         |         |   |          |          |         |   |          |          |         |   |          |          |          |   |          |         |          |   |          |         |          |   |          |         |          |   |          |         |         |   |          |         |          |   |          |         |          |   |          |          |          |   |          |         |         |   |          |          |         |   |          |          |         |   |          |          |         |   |          |          |          |   |          |          |         |   |          |         |          |   |          |         |          |   |          |         |          |   |          |         |          |   |         |         |          |   |         |          |          |   |         |          |         |   |         |         |         |   |          |         |         |   |         |         |         |
| C                                              | -3.31887                                                                                                                                                                                                                                                                                                                                                                                                                                                                                                                                                                                                                                                                                                                                                                                                                                                                                                                                                                                                                                                                                                                                                                                                                                                                                                                                                                                                                                                                                                                                                                                                                                                                                                                                                                                                                                                                                                                                                                                                                                  | 0.19479  | 0.10588  |         |         |   |          |          |         |   |          |          |         |   |          |          |          |   |          |         |          |   |          |         |          |   |          |         |          |   |          |         |         |   |          |         |          |   |          |         |          |   |          |          |          |   |          |         |         |   |          |          |         |   |          |          |         |   |          |          |         |   |          |          |          |   |          |          |         |   |          |         |          |   |          |         |          |   |          |         |          |   |          |         |          |   |         |         |          |   |         |          |          |   |         |          |         |   |         |         |         |   |          |         |         |   |         |         |         |
| N                                              | -2.38423                                                                                                                                                                                                                                                                                                                                                                                                                                                                                                                                                                                                                                                                                                                                                                                                                                                                                                                                                                                                                                                                                                                                                                                                                                                                                                                                                                                                                                                                                                                                                                                                                                                                                                                                                                                                                                                                                                                                                                                                                                  | 1.15899  | -0.03141 |         |         |   |          |          |         |   |          |          |         |   |          |          |          |   |          |         |          |   |          |         |          |   |          |         |          |   |          |         |         |   |          |         |          |   |          |         |          |   |          |          |          |   |          |         |         |   |          |          |         |   |          |          |         |   |          |          |         |   |          |          |          |   |          |          |         |   |          |         |          |   |          |         |          |   |          |         |          |   |          |         |          |   |         |         |          |   |         |          |          |   |         |          |         |   |         |         |         |   |          |         |         |   |         |         |         |
| H                                              | -2.47288                                                                                                                                                                                                                                                                                                                                                                                                                                                                                                                                                                                                                                                                                                                                                                                                                                                                                                                                                                                                                                                                                                                                                                                                                                                                                                                                                                                                                                                                                                                                                                                                                                                                                                                                                                                                                                                                                                                                                                                                                                  | 3.18123  | -0.74205 |         |         |   |          |          |         |   |          |          |         |   |          |          |          |   |          |         |          |   |          |         |          |   |          |         |          |   |          |         |         |   |          |         |          |   |          |         |          |   |          |          |          |   |          |         |         |   |          |          |         |   |          |          |         |   |          |          |         |   |          |          |          |   |          |          |         |   |          |         |          |   |          |         |          |   |          |         |          |   |          |         |          |   |         |         |          |   |         |          |          |   |         |          |         |   |         |         |         |   |          |         |         |   |         |         |         |
| H                                              | -5.79202                                                                                                                                                                                                                                                                                                                                                                                                                                                                                                                                                                                                                                                                                                                                                                                                                                                                                                                                                                                                                                                                                                                                                                                                                                                                                                                                                                                                                                                                                                                                                                                                                                                                                                                                                                                                                                                                                                                                                                                                                                  | -0.42515 | -0.20332 |         |         |   |          |          |         |   |          |          |         |   |          |          |          |   |          |         |          |   |          |         |          |   |          |         |          |   |          |         |         |   |          |         |          |   |          |         |          |   |          |          |          |   |          |         |         |   |          |          |         |   |          |          |         |   |          |          |         |   |          |          |          |   |          |          |         |   |          |         |          |   |          |         |          |   |          |         |          |   |          |         |          |   |         |         |          |   |         |          |          |   |         |          |         |   |         |         |         |   |          |         |         |   |         |         |         |
| H                                              | -1.37871                                                                                                                                                                                                                                                                                                                                                                                                                                                                                                                                                                                                                                                                                                                                                                                                                                                                                                                                                                                                                                                                                                                                                                                                                                                                                                                                                                                                                                                                                                                                                                                                                                                                                                                                                                                                                                                                                                                                                                                                                                  | 1.13430  | 0.20704  |         |         |   |          |          |         |   |          |          |         |   |          |          |          |   |          |         |          |   |          |         |          |   |          |         |          |   |          |         |         |   |          |         |          |   |          |         |          |   |          |          |          |   |          |         |         |   |          |          |         |   |          |          |         |   |          |          |         |   |          |          |          |   |          |          |         |   |          |         |          |   |          |         |          |   |          |         |          |   |          |         |          |   |         |         |          |   |         |          |          |   |         |          |         |   |         |         |         |   |          |         |         |   |         |         |         |
| H                                              | -3.12835                                                                                                                                                                                                                                                                                                                                                                                                                                                                                                                                                                                                                                                                                                                                                                                                                                                                                                                                                                                                                                                                                                                                                                                                                                                                                                                                                                                                                                                                                                                                                                                                                                                                                                                                                                                                                                                                                                                                                                                                                                  | -0.79352 | 0.49756  |         |         |   |          |          |         |   |          |          |         |   |          |          |          |   |          |         |          |   |          |         |          |   |          |         |          |   |          |         |         |   |          |         |          |   |          |         |          |   |          |          |          |   |          |         |         |   |          |          |         |   |          |          |         |   |          |          |         |   |          |          |          |   |          |          |         |   |          |         |          |   |          |         |          |   |          |         |          |   |          |         |          |   |         |         |          |   |         |          |          |   |         |          |         |   |         |         |         |   |          |         |         |   |         |         |         |
| C                                              | -7.29999                                                                                                                                                                                                                                                                                                                                                                                                                                                                                                                                                                                                                                                                                                                                                                                                                                                                                                                                                                                                                                                                                                                                                                                                                                                                                                                                                                                                                                                                                                                                                                                                                                                                                                                                                                                                                                                                                                                                                                                                                                  | -3.24975 | 0.46114  |         |         |   |          |          |         |   |          |          |         |   |          |          |          |   |          |         |          |   |          |         |          |   |          |         |          |   |          |         |         |   |          |         |          |   |          |         |          |   |          |          |          |   |          |         |         |   |          |          |         |   |          |          |         |   |          |          |         |   |          |          |          |   |          |          |         |   |          |         |          |   |          |         |          |   |          |         |          |   |          |         |          |   |         |         |          |   |         |          |          |   |         |          |         |   |         |         |         |   |          |         |         |   |         |         |         |
| H                                              | -8.10018                                                                                                                                                                                                                                                                                                                                                                                                                                                                                                                                                                                                                                                                                                                                                                                                                                                                                                                                                                                                                                                                                                                                                                                                                                                                                                                                                                                                                                                                                                                                                                                                                                                                                                                                                                                                                                                                                                                                                                                                                                  | -2.84877 | 1.09287  |         |         |   |          |          |         |   |          |          |         |   |          |          |          |   |          |         |          |   |          |         |          |   |          |         |          |   |          |         |         |   |          |         |          |   |          |         |          |   |          |          |          |   |          |         |         |   |          |          |         |   |          |          |         |   |          |          |         |   |          |          |          |   |          |          |         |   |          |         |          |   |          |         |          |   |          |         |          |   |          |         |          |   |         |         |          |   |         |          |          |   |         |          |         |   |         |         |         |   |          |         |         |   |         |         |         |
| H                                              | -7.73047                                                                                                                                                                                                                                                                                                                                                                                                                                                                                                                                                                                                                                                                                                                                                                                                                                                                                                                                                                                                                                                                                                                                                                                                                                                                                                                                                                                                                                                                                                                                                                                                                                                                                                                                                                                                                                                                                                                                                                                                                                  | -3.43204 | -0.52972 |         |         |   |          |          |         |   |          |          |         |   |          |          |          |   |          |         |          |   |          |         |          |   |          |         |          |   |          |         |         |   |          |         |          |   |          |         |          |   |          |          |          |   |          |         |         |   |          |          |         |   |          |          |         |   |          |          |         |   |          |          |          |   |          |          |         |   |          |         |          |   |          |         |          |   |          |         |          |   |          |         |          |   |         |         |          |   |         |          |          |   |         |          |         |   |         |         |         |   |          |         |         |   |         |         |         |
| H                                              | -6.92833                                                                                                                                                                                                                                                                                                                                                                                                                                                                                                                                                                                                                                                                                                                                                                                                                                                                                                                                                                                                                                                                                                                                                                                                                                                                                                                                                                                                                                                                                                                                                                                                                                                                                                                                                                                                                                                                                                                                                                                                                                  | -4.18560 | 0.88141  |         |         |   |          |          |         |   |          |          |         |   |          |          |          |   |          |         |          |   |          |         |          |   |          |         |          |   |          |         |         |   |          |         |          |   |          |         |          |   |          |          |          |   |          |         |         |   |          |          |         |   |          |          |         |   |          |          |         |   |          |          |          |   |          |          |         |   |          |         |          |   |          |         |          |   |          |         |          |   |          |         |          |   |         |         |          |   |         |          |          |   |         |          |         |   |         |         |         |   |          |         |         |   |         |         |         |
| C                                              | -5.47104                                                                                                                                                                                                                                                                                                                                                                                                                                                                                                                                                                                                                                                                                                                                                                                                                                                                                                                                                                                                                                                                                                                                                                                                                                                                                                                                                                                                                                                                                                                                                                                                                                                                                                                                                                                                                                                                                                                                                                                                                                  | 2.74951  | -1.23458 |         |         |   |          |          |         |   |          |          |         |   |          |          |          |   |          |         |          |   |          |         |          |   |          |         |          |   |          |         |         |   |          |         |          |   |          |         |          |   |          |          |          |   |          |         |         |   |          |          |         |   |          |          |         |   |          |          |         |   |          |          |          |   |          |          |         |   |          |         |          |   |          |         |          |   |          |         |          |   |          |         |          |   |         |         |          |   |         |          |          |   |         |          |         |   |         |         |         |   |          |         |         |   |         |         |         |
| H                                              | -5.91843                                                                                                                                                                                                                                                                                                                                                                                                                                                                                                                                                                                                                                                                                                                                                                                                                                                                                                                                                                                                                                                                                                                                                                                                                                                                                                                                                                                                                                                                                                                                                                                                                                                                                                                                                                                                                                                                                                                                                                                                                                  | 2.29391  | -2.12724 |         |         |   |          |          |         |   |          |          |         |   |          |          |          |   |          |         |          |   |          |         |          |   |          |         |          |   |          |         |         |   |          |         |          |   |          |         |          |   |          |          |          |   |          |         |         |   |          |          |         |   |          |          |         |   |          |          |         |   |          |          |          |   |          |          |         |   |          |         |          |   |          |         |          |   |          |         |          |   |          |         |          |   |         |         |          |   |         |          |          |   |         |          |         |   |         |         |         |   |          |         |         |   |         |         |         |
| H                                              | -6.27150                                                                                                                                                                                                                                                                                                                                                                                                                                                                                                                                                                                                                                                                                                                                                                                                                                                                                                                                                                                                                                                                                                                                                                                                                                                                                                                                                                                                                                                                                                                                                                                                                                                                                                                                                                                                                                                                                                                                                                                                                                  | 2.85227  | -0.49074 |         |         |   |          |          |         |   |          |          |         |   |          |          |          |   |          |         |          |   |          |         |          |   |          |         |          |   |          |         |         |   |          |         |          |   |          |         |          |   |          |          |          |   |          |         |         |   |          |          |         |   |          |          |         |   |          |          |         |   |          |          |          |   |          |          |         |   |          |         |          |   |          |         |          |   |          |         |          |   |          |         |          |   |         |         |          |   |         |          |          |   |         |          |         |   |         |         |         |   |          |         |         |   |         |         |         |
| H                                              | -5.13011                                                                                                                                                                                                                                                                                                                                                                                                                                                                                                                                                                                                                                                                                                                                                                                                                                                                                                                                                                                                                                                                                                                                                                                                                                                                                                                                                                                                                                                                                                                                                                                                                                                                                                                                                                                                                                                                                                                                                                                                                                  | 3.75466  | -1.50419 |         |         |   |          |          |         |   |          |          |         |   |          |          |          |   |          |         |          |   |          |         |          |   |          |         |          |   |          |         |         |   |          |         |          |   |          |         |          |   |          |          |          |   |          |         |         |   |          |          |         |   |          |          |         |   |          |          |         |   |          |          |          |   |          |          |         |   |          |         |          |   |          |         |          |   |          |         |          |   |          |         |          |   |         |         |          |   |         |          |          |   |         |          |         |   |         |         |         |   |          |         |         |   |         |         |         |
| C                                              | 1.30749                                                                                                                                                                                                                                                                                                                                                                                                                                                                                                                                                                                                                                                                                                                                                                                                                                                                                                                                                                                                                                                                                                                                                                                                                                                                                                                                                                                                                                                                                                                                                                                                                                                                                                                                                                                                                                                                                                                                                                                                                                   | 1.76812  | -0.28767 |         |         |   |          |          |         |   |          |          |         |   |          |          |          |   |          |         |          |   |          |         |          |   |          |         |          |   |          |         |         |   |          |         |          |   |          |         |          |   |          |          |          |   |          |         |         |   |          |          |         |   |          |          |         |   |          |          |         |   |          |          |          |   |          |          |         |   |          |         |          |   |          |         |          |   |          |         |          |   |          |         |          |   |         |         |          |   |         |          |          |   |         |          |         |   |         |         |         |   |          |         |         |   |         |         |         |
| C                                              | 1.72939                                                                                                                                                                                                                                                                                                                                                                                                                                                                                                                                                                                                                                                                                                                                                                                                                                                                                                                                                                                                                                                                                                                                                                                                                                                                                                                                                                                                                                                                                                                                                                                                                                                                                                                                                                                                                                                                                                                                                                                                                                   | -0.72728 | -0.01214 |         |         |   |          |          |         |   |          |          |         |   |          |          |          |   |          |         |          |   |          |         |          |   |          |         |          |   |          |         |         |   |          |         |          |   |          |         |          |   |          |          |          |   |          |         |         |   |          |          |         |   |          |          |         |   |          |          |         |   |          |          |          |   |          |          |         |   |          |         |          |   |          |         |          |   |          |         |          |   |          |         |          |   |         |         |          |   |         |          |          |   |         |          |         |   |         |         |         |   |          |         |         |   |         |         |         |
| O                                              | 2.34255                                                                                                                                                                                                                                                                                                                                                                                                                                                                                                                                                                                                                                                                                                                                                                                                                                                                                                                                                                                                                                                                                                                                                                                                                                                                                                                                                                                                                                                                                                                                                                                                                                                                                                                                                                                                                                                                                                                                                                                                                                   | -1.78065 | 0.07299  |         |         |   |          |          |         |   |          |          |         |   |          |          |          |   |          |         |          |   |          |         |          |   |          |         |          |   |          |         |         |   |          |         |          |   |          |         |          |   |          |          |          |   |          |         |         |   |          |          |         |   |          |          |         |   |          |          |         |   |          |          |          |   |          |          |         |   |          |         |          |   |          |         |          |   |          |         |          |   |          |         |          |   |         |         |          |   |         |          |          |   |         |          |         |   |         |         |         |   |          |         |         |   |         |         |         |
| C                                              | 0.44718                                                                                                                                                                                                                                                                                                                                                                                                                                                                                                                                                                                                                                                                                                                                                                                                                                                                                                                                                                                                                                                                                                                                                                                                                                                                                                                                                                                                                                                                                                                                                                                                                                                                                                                                                                                                                                                                                                                                                                                                                                   | 2.07068  | 2.00310  |         |         |   |          |          |         |   |          |          |         |   |          |          |          |   |          |         |          |   |          |         |          |   |          |         |          |   |          |         |         |   |          |         |          |   |          |         |          |   |          |          |          |   |          |         |         |   |          |          |         |   |          |          |         |   |          |          |         |   |          |          |          |   |          |          |         |   |          |         |          |   |          |         |          |   |          |         |          |   |          |         |          |   |         |         |          |   |         |          |          |   |         |          |         |   |         |         |         |   |          |         |         |   |         |         |         |
| H                                              | -0.42511                                                                                                                                                                                                                                                                                                                                                                                                                                                                                                                                                                                                                                                                                                                                                                                                                                                                                                                                                                                                                                                                                                                                                                                                                                                                                                                                                                                                                                                                                                                                                                                                                                                                                                                                                                                                                                                                                                                                                                                                                                  | 2.54892  | 2.46376  |         |         |   |          |          |         |   |          |          |         |   |          |          |          |   |          |         |          |   |          |         |          |   |          |         |          |   |          |         |         |   |          |         |          |   |          |         |          |   |          |          |          |   |          |         |         |   |          |          |         |   |          |          |         |   |          |          |         |   |          |          |          |   |          |          |         |   |          |         |          |   |          |         |          |   |          |         |          |   |          |         |          |   |         |         |          |   |         |          |          |   |         |          |         |   |         |         |         |   |          |         |         |   |         |         |         |
| H                                              | 0.59586                                                                                                                                                                                                                                                                                                                                                                                                                                                                                                                                                                                                                                                                                                                                                                                                                                                                                                                                                                                                                                                                                                                                                                                                                                                                                                                                                                                                                                                                                                                                                                                                                                                                                                                                                                                                                                                                                                                                                                                                                                   | 1.08208  | 2.45496  |         |         |   |          |          |         |   |          |          |         |   |          |          |          |   |          |         |          |   |          |         |          |   |          |         |          |   |          |         |         |   |          |         |          |   |          |         |          |   |          |          |          |   |          |         |         |   |          |          |         |   |          |          |         |   |          |          |         |   |          |          |          |   |          |          |         |   |          |         |          |   |          |         |          |   |          |         |          |   |          |         |          |   |         |         |          |   |         |          |          |   |         |          |         |   |         |         |         |   |          |         |         |   |         |         |         |



|   |          |          |          |
|---|----------|----------|----------|
| H | 1.34132  | 2.67173  | 2.20031  |
| C | 2.22767  | 0.63430  | 0.17171  |
| C | 3.76288  | 0.94295  | 0.16116  |
| C | 4.73072  | -0.20481 | -0.13055 |
| H | 3.99219  | 1.69506  | -0.62067 |
| O | 3.87658  | 1.46913  | 1.46371  |
| C | 5.55318  | -0.68108 | 0.89329  |
| C | 4.90713  | -0.71914 | -1.42204 |
| C | 6.51535  | -1.66074 | 0.64118  |
| H | 5.41299  | -0.23905 | 1.87488  |
| C | 5.86573  | -1.69778 | -1.68072 |
| H | 4.28050  | -0.34968 | -2.23313 |
| C | 6.67661  | -2.17611 | -0.64670 |
| H | 7.14723  | -2.02129 | 1.45202  |
| H | 5.98306  | -2.08956 | -2.69014 |
| H | 7.42770  | -2.93854 | -0.84639 |
| H | 2.61950  | 0.92579  | 1.39733  |
| O | 0.34524  | -0.76291 | -0.22621 |
| C | -0.19371 | -2.07747 | -0.32991 |
| H | -1.25302 | -1.95218 | -0.56776 |
| H | -0.08263 | -2.63069 | 0.60950  |
| H | 0.30346  | -2.65105 | -1.11890 |
| H | 0.78416  | 1.50391  | -1.21460 |
| C | 1.99441  | 3.12571  | -0.48861 |
| H | 2.56754  | 3.13505  | -1.42204 |
| H | 1.22825  | 3.90675  | -0.55198 |
| H | 2.68465  | 3.34017  | 0.33306  |

Optimized Molecular Properties for **T1-INT3**

|                                                |                                                                                                                                                                                                                                                                                                                                                                                                                                                                                                                                                                                                                                                                                                                           |                         |                   |
|------------------------------------------------|---------------------------------------------------------------------------------------------------------------------------------------------------------------------------------------------------------------------------------------------------------------------------------------------------------------------------------------------------------------------------------------------------------------------------------------------------------------------------------------------------------------------------------------------------------------------------------------------------------------------------------------------------------------------------------------------------------------------------|-------------------------|-------------------|
| Number of<br>(-)<br>Vibrational<br>Frequencies | 0                                                                                                                                                                                                                                                                                                                                                                                                                                                                                                                                                                                                                                                                                                                         |                         |                   |
| Absolute<br>Energies<br>(Hartrees)             | <p><b>B3LYP/6-31G(d)</b></p> <p>There are 14 positive frequencies below 100 cm<sup>-1</sup>.</p> <p>Zero-point correction: 0.444779 hartree<br/>         Enthalpy correction: 0.476301 hartree<br/>         Free Energy correction: 0.377034 hartree<br/>         Quasiharmonic Free Energy correction: 0.387696 hartree</p> <p>SCF Energy: -1301.194810 hartree<br/>         SCF Energy + ZPVE: -1300.750031 hartree<br/>         Enthalpy: -1300.718509 hartree<br/>         Free Energy: -1300.817776 hartree</p> <p>Free Energy with quasiharmonic correction: -1300.807114 hartree<br/>         (correction: 6.69 kcal/mol)</p> <p><b>B3LYP-D3/6-311+G(d,p)</b></p> <p>SCF Done: E(RB3LYP) = -1301.65585432 A.U.</p> |                         |                   |
| Cartesian<br>Coordinates                       | 54<br>spD3-INT3-T1.out                                                                                                                                                                                                                                                                                                                                                                                                                                                                                                                                                                                                                                                                                                    | Energy: -816801.3739651 |                   |
|                                                | O                                                                                                                                                                                                                                                                                                                                                                                                                                                                                                                                                                                                                                                                                                                         | -0.12788                | -2.16999 0.84010  |
|                                                | C                                                                                                                                                                                                                                                                                                                                                                                                                                                                                                                                                                                                                                                                                                                         | 6.82691                 | 0.01923 0.73838   |
|                                                | O                                                                                                                                                                                                                                                                                                                                                                                                                                                                                                                                                                                                                                                                                                                         | 6.12700                 | -0.74061 1.39106  |
|                                                | O                                                                                                                                                                                                                                                                                                                                                                                                                                                                                                                                                                                                                                                                                                                         | 6.40304                 | 0.80658 -0.23970  |
|                                                | C                                                                                                                                                                                                                                                                                                                                                                                                                                                                                                                                                                                                                                                                                                                         | 2.84191                 | 1.03727 -1.46788  |
|                                                | C                                                                                                                                                                                                                                                                                                                                                                                                                                                                                                                                                                                                                                                                                                                         | 1.61431                 | 0.48485 -1.18870  |
|                                                | N                                                                                                                                                                                                                                                                                                                                                                                                                                                                                                                                                                                                                                                                                                                         | 3.78398                 | 0.50713 -0.60250  |
|                                                | C                                                                                                                                                                                                                                                                                                                                                                                                                                                                                                                                                                                                                                                                                                                         | 3.13186                 | -0.34268 0.17849  |
|                                                | N                                                                                                                                                                                                                                                                                                                                                                                                                                                                                                                                                                                                                                                                                                                         | 1.81928                 | -0.38619 -0.13850 |
|                                                | H                                                                                                                                                                                                                                                                                                                                                                                                                                                                                                                                                                                                                                                                                                                         | 0.62581                 | 0.62323 -1.61219  |
|                                                | H                                                                                                                                                                                                                                                                                                                                                                                                                                                                                                                                                                                                                                                                                                                         | 5.38101                 | 0.69373 -0.38362  |
|                                                | H                                                                                                                                                                                                                                                                                                                                                                                                                                                                                                                                                                                                                                                                                                                         | 1.08954                 | -0.97801 0.29808  |
|                                                | H                                                                                                                                                                                                                                                                                                                                                                                                                                                                                                                                                                                                                                                                                                                         | 3.59459                 | -0.92338 0.96358  |
|                                                | C                                                                                                                                                                                                                                                                                                                                                                                                                                                                                                                                                                                                                                                                                                                         | 8.32261                 | 0.16458 0.97181   |
|                                                | H                                                                                                                                                                                                                                                                                                                                                                                                                                                                                                                                                                                                                                                                                                                         | 8.87031                 | -0.07752 0.05433  |
|                                                | H                                                                                                                                                                                                                                                                                                                                                                                                                                                                                                                                                                                                                                                                                                                         | 8.56224                 | 1.20282 1.22684   |
|                                                | H                                                                                                                                                                                                                                                                                                                                                                                                                                                                                                                                                                                                                                                                                                                         | 8.63969                 | -0.49796 1.77901  |
|                                                | C                                                                                                                                                                                                                                                                                                                                                                                                                                                                                                                                                                                                                                                                                                                         | 3.20528                 | 2.04993 -2.50862  |
|                                                | H                                                                                                                                                                                                                                                                                                                                                                                                                                                                                                                                                                                                                                                                                                                         | 3.63095                 | 2.95619 -2.05829  |
|                                                | H                                                                                                                                                                                                                                                                                                                                                                                                                                                                                                                                                                                                                                                                                                                         | 3.95327                 | 1.65822 -3.21057  |
|                                                | H                                                                                                                                                                                                                                                                                                                                                                                                                                                                                                                                                                                                                                                                                                                         | 2.32156                 | 2.34268 -3.08451  |
|                                                | C                                                                                                                                                                                                                                                                                                                                                                                                                                                                                                                                                                                                                                                                                                                         | -1.50225                | -1.69085 1.26967  |
|                                                | C                                                                                                                                                                                                                                                                                                                                                                                                                                                                                                                                                                                                                                                                                                                         | -3.16474                | -1.54930 -0.62594 |
|                                                | O                                                                                                                                                                                                                                                                                                                                                                                                                                                                                                                                                                                                                                                                                                                         | -3.69306                | -1.03367 -1.64458 |
|                                                | C                                                                                                                                                                                                                                                                                                                                                                                                                                                                                                                                                                                                                                                                                                                         | -0.17852                | -3.09843 -0.22570 |
|                                                | H                                                                                                                                                                                                                                                                                                                                                                                                                                                                                                                                                                                                                                                                                                                         | -0.72185                | -4.00971 0.06768  |
|                                                | H                                                                                                                                                                                                                                                                                                                                                                                                                                                                                                                                                                                                                                                                                                                         | -0.67174                | -2.67313 -1.10946 |

|   |          |          |          |
|---|----------|----------|----------|
| H | 0.85478  | -3.36286 | -0.47866 |
| C | -2.24654 | -0.93904 | 0.23462  |
| C | -1.89885 | 0.49145  | -0.11718 |
| C | -2.94591 | 1.55167  | 0.28718  |
| H | -0.97206 | 0.77034  | 0.40320  |
| O | -1.58599 | 0.66648  | -1.51760 |
| C | -2.89361 | 2.83311  | -0.28246 |
| C | -3.92795 | 1.30061  | 1.25102  |
| C | -3.78658 | 3.83157  | 0.10573  |
| H | -2.15083 | 3.02618  | -1.05043 |
| C | -4.82722 | 2.29602  | 1.64237  |
| H | -3.98765 | 0.30074  | 1.67102  |
| C | -4.75962 | 3.56868  | 1.07429  |
| H | -3.72782 | 4.81777  | -0.35216 |
| H | -5.58763 | 2.07269  | 2.38892  |
| H | -5.45932 | 4.34557  | 1.37676  |
| H | -2.32837 | 0.17787  | -1.94798 |
| O | -3.51187 | -2.87551 | -0.30418 |
| C | -4.40069 | -3.48853 | -1.21873 |
| H | -4.56390 | -4.50508 | -0.84377 |
| H | -3.98345 | -3.53200 | -2.23269 |
| H | -5.35908 | -2.95862 | -1.27839 |
| H | -2.04385 | -2.61508 | 1.50022  |
| C | -1.19656 | -0.95638 | 2.57670  |
| H | -0.62617 | -0.03698 | 2.40177  |
| H | -0.60710 | -1.59282 | 3.24699  |
| H | -2.12865 | -0.68008 | 3.08041  |

Optimized Molecular Properties for **T1-TS4**

|                                                |                                                                                                                                                                                                                                                                                                                                                                                                                                                                                                                                                                                                                                                                                                                                                                                                                                                                                                                                                                                                                                                                                                                                                                                                                                                                                                                                                                                                                                                                                                                                                                                                                                                                                                                                                                                                                                                                                                                                                                                                                                                 |          |          |         |         |   |          |          |         |   |          |         |         |   |          |          |          |   |          |          |          |   |          |          |          |   |          |          |          |   |          |         |         |   |          |         |          |   |          |          |          |   |          |          |          |   |          |         |         |   |          |         |         |   |          |          |         |   |          |          |          |   |          |          |         |   |          |         |         |   |          |          |          |   |          |          |          |   |          |          |          |   |          |          |          |   |         |         |         |   |         |         |          |   |         |         |          |   |         |         |          |   |         |         |          |   |         |         |          |
|------------------------------------------------|-------------------------------------------------------------------------------------------------------------------------------------------------------------------------------------------------------------------------------------------------------------------------------------------------------------------------------------------------------------------------------------------------------------------------------------------------------------------------------------------------------------------------------------------------------------------------------------------------------------------------------------------------------------------------------------------------------------------------------------------------------------------------------------------------------------------------------------------------------------------------------------------------------------------------------------------------------------------------------------------------------------------------------------------------------------------------------------------------------------------------------------------------------------------------------------------------------------------------------------------------------------------------------------------------------------------------------------------------------------------------------------------------------------------------------------------------------------------------------------------------------------------------------------------------------------------------------------------------------------------------------------------------------------------------------------------------------------------------------------------------------------------------------------------------------------------------------------------------------------------------------------------------------------------------------------------------------------------------------------------------------------------------------------------------|----------|----------|---------|---------|---|----------|----------|---------|---|----------|---------|---------|---|----------|----------|----------|---|----------|----------|----------|---|----------|----------|----------|---|----------|----------|----------|---|----------|---------|---------|---|----------|---------|----------|---|----------|----------|----------|---|----------|----------|----------|---|----------|---------|---------|---|----------|---------|---------|---|----------|----------|---------|---|----------|----------|----------|---|----------|----------|---------|---|----------|---------|---------|---|----------|----------|----------|---|----------|----------|----------|---|----------|----------|----------|---|----------|----------|----------|---|---------|---------|---------|---|---------|---------|----------|---|---------|---------|----------|---|---------|---------|----------|---|---------|---------|----------|---|---------|---------|----------|
| Number of<br>(-)<br>Vibrational<br>Frequencies | 1 (-250.5422)                                                                                                                                                                                                                                                                                                                                                                                                                                                                                                                                                                                                                                                                                                                                                                                                                                                                                                                                                                                                                                                                                                                                                                                                                                                                                                                                                                                                                                                                                                                                                                                                                                                                                                                                                                                                                                                                                                                                                                                                                                   |          |          |         |         |   |          |          |         |   |          |         |         |   |          |          |          |   |          |          |          |   |          |          |          |   |          |          |          |   |          |         |         |   |          |         |          |   |          |          |          |   |          |          |          |   |          |         |         |   |          |         |         |   |          |          |         |   |          |          |          |   |          |          |         |   |          |         |         |   |          |          |          |   |          |          |          |   |          |          |          |   |          |          |          |   |         |         |         |   |         |         |          |   |         |         |          |   |         |         |          |   |         |         |          |   |         |         |          |
| Absolute<br>Energies<br>(Hartrees)             | <p><b>B3LYP/6-31G(d)</b></p> <p>There are 14 positive frequencies below 100 cm<sup>-1</sup>.</p> <p>Zero-point correction: 0.438356 hartree<br/>         Enthalpy correction: 0.470151 hartree<br/>         Free Energy correction: 0.369866 hartree<br/>         Quasiharmonic Free Energy correction: 0.381074 hartree</p> <p>SCF Energy: -1301.182796 hartree<br/>         SCF Energy + ZPVE: -1300.744440 hartree<br/>         Enthalpy: -1300.712645 hartree<br/>         Free Energy: -1300.812930 hartree</p> <p>Free Energy with quasiharmonic correction: -1300.801722 hartree<br/>         (correction: 7.03 kcal/mol)</p> <p><b>B3LYP-D3/6-311+G(d,p)</b></p> <p>SCF Done: E(RB3LYP) = -1301.64874370 A.U.</p>                                                                                                                                                                                                                                                                                                                                                                                                                                                                                                                                                                                                                                                                                                                                                                                                                                                                                                                                                                                                                                                                                                                                                                                                                                                                                                                       |          |          |         |         |   |          |          |         |   |          |         |         |   |          |          |          |   |          |          |          |   |          |          |          |   |          |          |          |   |          |         |         |   |          |         |          |   |          |          |          |   |          |          |          |   |          |         |         |   |          |         |         |   |          |          |         |   |          |          |          |   |          |          |         |   |          |         |         |   |          |          |          |   |          |          |          |   |          |          |          |   |          |          |          |   |         |         |         |   |         |         |          |   |         |         |          |   |         |         |          |   |         |         |          |   |         |         |          |
| Cartesian<br>Coordinates                       | <p>54<br/>         spD3-TS4-T1.out Energy: -816796.9119837</p> <table> <tr><td>O</td><td>-0.28788</td><td>2.46602</td><td>0.46648</td></tr> <tr><td>C</td><td>-6.92603</td><td>-0.20847</td><td>0.70906</td></tr> <tr><td>O</td><td>-6.38046</td><td>0.73441</td><td>1.26537</td></tr> <tr><td>O</td><td>-6.35598</td><td>-1.03730</td><td>-0.14673</td></tr> <tr><td>C</td><td>-2.85299</td><td>-1.01475</td><td>-1.33028</td></tr> <tr><td>C</td><td>-1.69211</td><td>-0.29261</td><td>-1.15987</td></tr> <tr><td>N</td><td>-3.84042</td><td>-0.44638</td><td>-0.54972</td></tr> <tr><td>C</td><td>-3.26372</td><td>0.58794</td><td>0.06373</td></tr> <tr><td>N</td><td>-1.96740</td><td>0.72245</td><td>-0.26979</td></tr> <tr><td>H</td><td>-0.70712</td><td>-0.41279</td><td>-1.59309</td></tr> <tr><td>H</td><td>-5.33778</td><td>-0.78812</td><td>-0.30285</td></tr> <tr><td>H</td><td>-1.20961</td><td>1.51874</td><td>0.09514</td></tr> <tr><td>H</td><td>-3.78721</td><td>1.23831</td><td>0.75082</td></tr> <tr><td>C</td><td>-8.39099</td><td>-0.55615</td><td>0.94480</td></tr> <tr><td>H</td><td>-8.94215</td><td>-0.51744</td><td>-0.00157</td></tr> <tr><td>H</td><td>-8.47677</td><td>-1.57976</td><td>1.32642</td></tr> <tr><td>H</td><td>-8.83122</td><td>0.14327</td><td>1.65819</td></tr> <tr><td>C</td><td>-3.10797</td><td>-2.21710</td><td>-2.18586</td></tr> <tr><td>H</td><td>-3.44048</td><td>-3.07806</td><td>-1.59010</td></tr> <tr><td>H</td><td>-3.88962</td><td>-2.02697</td><td>-2.93412</td></tr> <tr><td>H</td><td>-2.19701</td><td>-2.51010</td><td>-2.71889</td></tr> <tr><td>C</td><td>1.46971</td><td>1.42100</td><td>1.28610</td></tr> <tr><td>C</td><td>3.24436</td><td>1.58752</td><td>-0.41043</td></tr> <tr><td>O</td><td>3.83766</td><td>1.19668</td><td>-1.42390</td></tr> <tr><td>C</td><td>0.06758</td><td>3.14659</td><td>-0.68380</td></tr> <tr><td>H</td><td>0.34748</td><td>4.20076</td><td>-0.48246</td></tr> <tr><td>H</td><td>0.93302</td><td>2.68399</td><td>-1.20822</td></tr> </table> | O        | -0.28788 | 2.46602 | 0.46648 | C | -6.92603 | -0.20847 | 0.70906 | O | -6.38046 | 0.73441 | 1.26537 | O | -6.35598 | -1.03730 | -0.14673 | C | -2.85299 | -1.01475 | -1.33028 | C | -1.69211 | -0.29261 | -1.15987 | N | -3.84042 | -0.44638 | -0.54972 | C | -3.26372 | 0.58794 | 0.06373 | N | -1.96740 | 0.72245 | -0.26979 | H | -0.70712 | -0.41279 | -1.59309 | H | -5.33778 | -0.78812 | -0.30285 | H | -1.20961 | 1.51874 | 0.09514 | H | -3.78721 | 1.23831 | 0.75082 | C | -8.39099 | -0.55615 | 0.94480 | H | -8.94215 | -0.51744 | -0.00157 | H | -8.47677 | -1.57976 | 1.32642 | H | -8.83122 | 0.14327 | 1.65819 | C | -3.10797 | -2.21710 | -2.18586 | H | -3.44048 | -3.07806 | -1.59010 | H | -3.88962 | -2.02697 | -2.93412 | H | -2.19701 | -2.51010 | -2.71889 | C | 1.46971 | 1.42100 | 1.28610 | C | 3.24436 | 1.58752 | -0.41043 | O | 3.83766 | 1.19668 | -1.42390 | C | 0.06758 | 3.14659 | -0.68380 | H | 0.34748 | 4.20076 | -0.48246 | H | 0.93302 | 2.68399 | -1.20822 |
| O                                              | -0.28788                                                                                                                                                                                                                                                                                                                                                                                                                                                                                                                                                                                                                                                                                                                                                                                                                                                                                                                                                                                                                                                                                                                                                                                                                                                                                                                                                                                                                                                                                                                                                                                                                                                                                                                                                                                                                                                                                                                                                                                                                                        | 2.46602  | 0.46648  |         |         |   |          |          |         |   |          |         |         |   |          |          |          |   |          |          |          |   |          |          |          |   |          |          |          |   |          |         |         |   |          |         |          |   |          |          |          |   |          |          |          |   |          |         |         |   |          |         |         |   |          |          |         |   |          |          |          |   |          |          |         |   |          |         |         |   |          |          |          |   |          |          |          |   |          |          |          |   |          |          |          |   |         |         |         |   |         |         |          |   |         |         |          |   |         |         |          |   |         |         |          |   |         |         |          |
| C                                              | -6.92603                                                                                                                                                                                                                                                                                                                                                                                                                                                                                                                                                                                                                                                                                                                                                                                                                                                                                                                                                                                                                                                                                                                                                                                                                                                                                                                                                                                                                                                                                                                                                                                                                                                                                                                                                                                                                                                                                                                                                                                                                                        | -0.20847 | 0.70906  |         |         |   |          |          |         |   |          |         |         |   |          |          |          |   |          |          |          |   |          |          |          |   |          |          |          |   |          |         |         |   |          |         |          |   |          |          |          |   |          |          |          |   |          |         |         |   |          |         |         |   |          |          |         |   |          |          |          |   |          |          |         |   |          |         |         |   |          |          |          |   |          |          |          |   |          |          |          |   |          |          |          |   |         |         |         |   |         |         |          |   |         |         |          |   |         |         |          |   |         |         |          |   |         |         |          |
| O                                              | -6.38046                                                                                                                                                                                                                                                                                                                                                                                                                                                                                                                                                                                                                                                                                                                                                                                                                                                                                                                                                                                                                                                                                                                                                                                                                                                                                                                                                                                                                                                                                                                                                                                                                                                                                                                                                                                                                                                                                                                                                                                                                                        | 0.73441  | 1.26537  |         |         |   |          |          |         |   |          |         |         |   |          |          |          |   |          |          |          |   |          |          |          |   |          |          |          |   |          |         |         |   |          |         |          |   |          |          |          |   |          |          |          |   |          |         |         |   |          |         |         |   |          |          |         |   |          |          |          |   |          |          |         |   |          |         |         |   |          |          |          |   |          |          |          |   |          |          |          |   |          |          |          |   |         |         |         |   |         |         |          |   |         |         |          |   |         |         |          |   |         |         |          |   |         |         |          |
| O                                              | -6.35598                                                                                                                                                                                                                                                                                                                                                                                                                                                                                                                                                                                                                                                                                                                                                                                                                                                                                                                                                                                                                                                                                                                                                                                                                                                                                                                                                                                                                                                                                                                                                                                                                                                                                                                                                                                                                                                                                                                                                                                                                                        | -1.03730 | -0.14673 |         |         |   |          |          |         |   |          |         |         |   |          |          |          |   |          |          |          |   |          |          |          |   |          |          |          |   |          |         |         |   |          |         |          |   |          |          |          |   |          |          |          |   |          |         |         |   |          |         |         |   |          |          |         |   |          |          |          |   |          |          |         |   |          |         |         |   |          |          |          |   |          |          |          |   |          |          |          |   |          |          |          |   |         |         |         |   |         |         |          |   |         |         |          |   |         |         |          |   |         |         |          |   |         |         |          |
| C                                              | -2.85299                                                                                                                                                                                                                                                                                                                                                                                                                                                                                                                                                                                                                                                                                                                                                                                                                                                                                                                                                                                                                                                                                                                                                                                                                                                                                                                                                                                                                                                                                                                                                                                                                                                                                                                                                                                                                                                                                                                                                                                                                                        | -1.01475 | -1.33028 |         |         |   |          |          |         |   |          |         |         |   |          |          |          |   |          |          |          |   |          |          |          |   |          |          |          |   |          |         |         |   |          |         |          |   |          |          |          |   |          |          |          |   |          |         |         |   |          |         |         |   |          |          |         |   |          |          |          |   |          |          |         |   |          |         |         |   |          |          |          |   |          |          |          |   |          |          |          |   |          |          |          |   |         |         |         |   |         |         |          |   |         |         |          |   |         |         |          |   |         |         |          |   |         |         |          |
| C                                              | -1.69211                                                                                                                                                                                                                                                                                                                                                                                                                                                                                                                                                                                                                                                                                                                                                                                                                                                                                                                                                                                                                                                                                                                                                                                                                                                                                                                                                                                                                                                                                                                                                                                                                                                                                                                                                                                                                                                                                                                                                                                                                                        | -0.29261 | -1.15987 |         |         |   |          |          |         |   |          |         |         |   |          |          |          |   |          |          |          |   |          |          |          |   |          |          |          |   |          |         |         |   |          |         |          |   |          |          |          |   |          |          |          |   |          |         |         |   |          |         |         |   |          |          |         |   |          |          |          |   |          |          |         |   |          |         |         |   |          |          |          |   |          |          |          |   |          |          |          |   |          |          |          |   |         |         |         |   |         |         |          |   |         |         |          |   |         |         |          |   |         |         |          |   |         |         |          |
| N                                              | -3.84042                                                                                                                                                                                                                                                                                                                                                                                                                                                                                                                                                                                                                                                                                                                                                                                                                                                                                                                                                                                                                                                                                                                                                                                                                                                                                                                                                                                                                                                                                                                                                                                                                                                                                                                                                                                                                                                                                                                                                                                                                                        | -0.44638 | -0.54972 |         |         |   |          |          |         |   |          |         |         |   |          |          |          |   |          |          |          |   |          |          |          |   |          |          |          |   |          |         |         |   |          |         |          |   |          |          |          |   |          |          |          |   |          |         |         |   |          |         |         |   |          |          |         |   |          |          |          |   |          |          |         |   |          |         |         |   |          |          |          |   |          |          |          |   |          |          |          |   |          |          |          |   |         |         |         |   |         |         |          |   |         |         |          |   |         |         |          |   |         |         |          |   |         |         |          |
| C                                              | -3.26372                                                                                                                                                                                                                                                                                                                                                                                                                                                                                                                                                                                                                                                                                                                                                                                                                                                                                                                                                                                                                                                                                                                                                                                                                                                                                                                                                                                                                                                                                                                                                                                                                                                                                                                                                                                                                                                                                                                                                                                                                                        | 0.58794  | 0.06373  |         |         |   |          |          |         |   |          |         |         |   |          |          |          |   |          |          |          |   |          |          |          |   |          |          |          |   |          |         |         |   |          |         |          |   |          |          |          |   |          |          |          |   |          |         |         |   |          |         |         |   |          |          |         |   |          |          |          |   |          |          |         |   |          |         |         |   |          |          |          |   |          |          |          |   |          |          |          |   |          |          |          |   |         |         |         |   |         |         |          |   |         |         |          |   |         |         |          |   |         |         |          |   |         |         |          |
| N                                              | -1.96740                                                                                                                                                                                                                                                                                                                                                                                                                                                                                                                                                                                                                                                                                                                                                                                                                                                                                                                                                                                                                                                                                                                                                                                                                                                                                                                                                                                                                                                                                                                                                                                                                                                                                                                                                                                                                                                                                                                                                                                                                                        | 0.72245  | -0.26979 |         |         |   |          |          |         |   |          |         |         |   |          |          |          |   |          |          |          |   |          |          |          |   |          |          |          |   |          |         |         |   |          |         |          |   |          |          |          |   |          |          |          |   |          |         |         |   |          |         |         |   |          |          |         |   |          |          |          |   |          |          |         |   |          |         |         |   |          |          |          |   |          |          |          |   |          |          |          |   |          |          |          |   |         |         |         |   |         |         |          |   |         |         |          |   |         |         |          |   |         |         |          |   |         |         |          |
| H                                              | -0.70712                                                                                                                                                                                                                                                                                                                                                                                                                                                                                                                                                                                                                                                                                                                                                                                                                                                                                                                                                                                                                                                                                                                                                                                                                                                                                                                                                                                                                                                                                                                                                                                                                                                                                                                                                                                                                                                                                                                                                                                                                                        | -0.41279 | -1.59309 |         |         |   |          |          |         |   |          |         |         |   |          |          |          |   |          |          |          |   |          |          |          |   |          |          |          |   |          |         |         |   |          |         |          |   |          |          |          |   |          |          |          |   |          |         |         |   |          |         |         |   |          |          |         |   |          |          |          |   |          |          |         |   |          |         |         |   |          |          |          |   |          |          |          |   |          |          |          |   |          |          |          |   |         |         |         |   |         |         |          |   |         |         |          |   |         |         |          |   |         |         |          |   |         |         |          |
| H                                              | -5.33778                                                                                                                                                                                                                                                                                                                                                                                                                                                                                                                                                                                                                                                                                                                                                                                                                                                                                                                                                                                                                                                                                                                                                                                                                                                                                                                                                                                                                                                                                                                                                                                                                                                                                                                                                                                                                                                                                                                                                                                                                                        | -0.78812 | -0.30285 |         |         |   |          |          |         |   |          |         |         |   |          |          |          |   |          |          |          |   |          |          |          |   |          |          |          |   |          |         |         |   |          |         |          |   |          |          |          |   |          |          |          |   |          |         |         |   |          |         |         |   |          |          |         |   |          |          |          |   |          |          |         |   |          |         |         |   |          |          |          |   |          |          |          |   |          |          |          |   |          |          |          |   |         |         |         |   |         |         |          |   |         |         |          |   |         |         |          |   |         |         |          |   |         |         |          |
| H                                              | -1.20961                                                                                                                                                                                                                                                                                                                                                                                                                                                                                                                                                                                                                                                                                                                                                                                                                                                                                                                                                                                                                                                                                                                                                                                                                                                                                                                                                                                                                                                                                                                                                                                                                                                                                                                                                                                                                                                                                                                                                                                                                                        | 1.51874  | 0.09514  |         |         |   |          |          |         |   |          |         |         |   |          |          |          |   |          |          |          |   |          |          |          |   |          |          |          |   |          |         |         |   |          |         |          |   |          |          |          |   |          |          |          |   |          |         |         |   |          |         |         |   |          |          |         |   |          |          |          |   |          |          |         |   |          |         |         |   |          |          |          |   |          |          |          |   |          |          |          |   |          |          |          |   |         |         |         |   |         |         |          |   |         |         |          |   |         |         |          |   |         |         |          |   |         |         |          |
| H                                              | -3.78721                                                                                                                                                                                                                                                                                                                                                                                                                                                                                                                                                                                                                                                                                                                                                                                                                                                                                                                                                                                                                                                                                                                                                                                                                                                                                                                                                                                                                                                                                                                                                                                                                                                                                                                                                                                                                                                                                                                                                                                                                                        | 1.23831  | 0.75082  |         |         |   |          |          |         |   |          |         |         |   |          |          |          |   |          |          |          |   |          |          |          |   |          |          |          |   |          |         |         |   |          |         |          |   |          |          |          |   |          |          |          |   |          |         |         |   |          |         |         |   |          |          |         |   |          |          |          |   |          |          |         |   |          |         |         |   |          |          |          |   |          |          |          |   |          |          |          |   |          |          |          |   |         |         |         |   |         |         |          |   |         |         |          |   |         |         |          |   |         |         |          |   |         |         |          |
| C                                              | -8.39099                                                                                                                                                                                                                                                                                                                                                                                                                                                                                                                                                                                                                                                                                                                                                                                                                                                                                                                                                                                                                                                                                                                                                                                                                                                                                                                                                                                                                                                                                                                                                                                                                                                                                                                                                                                                                                                                                                                                                                                                                                        | -0.55615 | 0.94480  |         |         |   |          |          |         |   |          |         |         |   |          |          |          |   |          |          |          |   |          |          |          |   |          |          |          |   |          |         |         |   |          |         |          |   |          |          |          |   |          |          |          |   |          |         |         |   |          |         |         |   |          |          |         |   |          |          |          |   |          |          |         |   |          |         |         |   |          |          |          |   |          |          |          |   |          |          |          |   |          |          |          |   |         |         |         |   |         |         |          |   |         |         |          |   |         |         |          |   |         |         |          |   |         |         |          |
| H                                              | -8.94215                                                                                                                                                                                                                                                                                                                                                                                                                                                                                                                                                                                                                                                                                                                                                                                                                                                                                                                                                                                                                                                                                                                                                                                                                                                                                                                                                                                                                                                                                                                                                                                                                                                                                                                                                                                                                                                                                                                                                                                                                                        | -0.51744 | -0.00157 |         |         |   |          |          |         |   |          |         |         |   |          |          |          |   |          |          |          |   |          |          |          |   |          |          |          |   |          |         |         |   |          |         |          |   |          |          |          |   |          |          |          |   |          |         |         |   |          |         |         |   |          |          |         |   |          |          |          |   |          |          |         |   |          |         |         |   |          |          |          |   |          |          |          |   |          |          |          |   |          |          |          |   |         |         |         |   |         |         |          |   |         |         |          |   |         |         |          |   |         |         |          |   |         |         |          |
| H                                              | -8.47677                                                                                                                                                                                                                                                                                                                                                                                                                                                                                                                                                                                                                                                                                                                                                                                                                                                                                                                                                                                                                                                                                                                                                                                                                                                                                                                                                                                                                                                                                                                                                                                                                                                                                                                                                                                                                                                                                                                                                                                                                                        | -1.57976 | 1.32642  |         |         |   |          |          |         |   |          |         |         |   |          |          |          |   |          |          |          |   |          |          |          |   |          |          |          |   |          |         |         |   |          |         |          |   |          |          |          |   |          |          |          |   |          |         |         |   |          |         |         |   |          |          |         |   |          |          |          |   |          |          |         |   |          |         |         |   |          |          |          |   |          |          |          |   |          |          |          |   |          |          |          |   |         |         |         |   |         |         |          |   |         |         |          |   |         |         |          |   |         |         |          |   |         |         |          |
| H                                              | -8.83122                                                                                                                                                                                                                                                                                                                                                                                                                                                                                                                                                                                                                                                                                                                                                                                                                                                                                                                                                                                                                                                                                                                                                                                                                                                                                                                                                                                                                                                                                                                                                                                                                                                                                                                                                                                                                                                                                                                                                                                                                                        | 0.14327  | 1.65819  |         |         |   |          |          |         |   |          |         |         |   |          |          |          |   |          |          |          |   |          |          |          |   |          |          |          |   |          |         |         |   |          |         |          |   |          |          |          |   |          |          |          |   |          |         |         |   |          |         |         |   |          |          |         |   |          |          |          |   |          |          |         |   |          |         |         |   |          |          |          |   |          |          |          |   |          |          |          |   |          |          |          |   |         |         |         |   |         |         |          |   |         |         |          |   |         |         |          |   |         |         |          |   |         |         |          |
| C                                              | -3.10797                                                                                                                                                                                                                                                                                                                                                                                                                                                                                                                                                                                                                                                                                                                                                                                                                                                                                                                                                                                                                                                                                                                                                                                                                                                                                                                                                                                                                                                                                                                                                                                                                                                                                                                                                                                                                                                                                                                                                                                                                                        | -2.21710 | -2.18586 |         |         |   |          |          |         |   |          |         |         |   |          |          |          |   |          |          |          |   |          |          |          |   |          |          |          |   |          |         |         |   |          |         |          |   |          |          |          |   |          |          |          |   |          |         |         |   |          |         |         |   |          |          |         |   |          |          |          |   |          |          |         |   |          |         |         |   |          |          |          |   |          |          |          |   |          |          |          |   |          |          |          |   |         |         |         |   |         |         |          |   |         |         |          |   |         |         |          |   |         |         |          |   |         |         |          |
| H                                              | -3.44048                                                                                                                                                                                                                                                                                                                                                                                                                                                                                                                                                                                                                                                                                                                                                                                                                                                                                                                                                                                                                                                                                                                                                                                                                                                                                                                                                                                                                                                                                                                                                                                                                                                                                                                                                                                                                                                                                                                                                                                                                                        | -3.07806 | -1.59010 |         |         |   |          |          |         |   |          |         |         |   |          |          |          |   |          |          |          |   |          |          |          |   |          |          |          |   |          |         |         |   |          |         |          |   |          |          |          |   |          |          |          |   |          |         |         |   |          |         |         |   |          |          |         |   |          |          |          |   |          |          |         |   |          |         |         |   |          |          |          |   |          |          |          |   |          |          |          |   |          |          |          |   |         |         |         |   |         |         |          |   |         |         |          |   |         |         |          |   |         |         |          |   |         |         |          |
| H                                              | -3.88962                                                                                                                                                                                                                                                                                                                                                                                                                                                                                                                                                                                                                                                                                                                                                                                                                                                                                                                                                                                                                                                                                                                                                                                                                                                                                                                                                                                                                                                                                                                                                                                                                                                                                                                                                                                                                                                                                                                                                                                                                                        | -2.02697 | -2.93412 |         |         |   |          |          |         |   |          |         |         |   |          |          |          |   |          |          |          |   |          |          |          |   |          |          |          |   |          |         |         |   |          |         |          |   |          |          |          |   |          |          |          |   |          |         |         |   |          |         |         |   |          |          |         |   |          |          |          |   |          |          |         |   |          |         |         |   |          |          |          |   |          |          |          |   |          |          |          |   |          |          |          |   |         |         |         |   |         |         |          |   |         |         |          |   |         |         |          |   |         |         |          |   |         |         |          |
| H                                              | -2.19701                                                                                                                                                                                                                                                                                                                                                                                                                                                                                                                                                                                                                                                                                                                                                                                                                                                                                                                                                                                                                                                                                                                                                                                                                                                                                                                                                                                                                                                                                                                                                                                                                                                                                                                                                                                                                                                                                                                                                                                                                                        | -2.51010 | -2.71889 |         |         |   |          |          |         |   |          |         |         |   |          |          |          |   |          |          |          |   |          |          |          |   |          |          |          |   |          |         |         |   |          |         |          |   |          |          |          |   |          |          |          |   |          |         |         |   |          |         |         |   |          |          |         |   |          |          |          |   |          |          |         |   |          |         |         |   |          |          |          |   |          |          |          |   |          |          |          |   |          |          |          |   |         |         |         |   |         |         |          |   |         |         |          |   |         |         |          |   |         |         |          |   |         |         |          |
| C                                              | 1.46971                                                                                                                                                                                                                                                                                                                                                                                                                                                                                                                                                                                                                                                                                                                                                                                                                                                                                                                                                                                                                                                                                                                                                                                                                                                                                                                                                                                                                                                                                                                                                                                                                                                                                                                                                                                                                                                                                                                                                                                                                                         | 1.42100  | 1.28610  |         |         |   |          |          |         |   |          |         |         |   |          |          |          |   |          |          |          |   |          |          |          |   |          |          |          |   |          |         |         |   |          |         |          |   |          |          |          |   |          |          |          |   |          |         |         |   |          |         |         |   |          |          |         |   |          |          |          |   |          |          |         |   |          |         |         |   |          |          |          |   |          |          |          |   |          |          |          |   |          |          |          |   |         |         |         |   |         |         |          |   |         |         |          |   |         |         |          |   |         |         |          |   |         |         |          |
| C                                              | 3.24436                                                                                                                                                                                                                                                                                                                                                                                                                                                                                                                                                                                                                                                                                                                                                                                                                                                                                                                                                                                                                                                                                                                                                                                                                                                                                                                                                                                                                                                                                                                                                                                                                                                                                                                                                                                                                                                                                                                                                                                                                                         | 1.58752  | -0.41043 |         |         |   |          |          |         |   |          |         |         |   |          |          |          |   |          |          |          |   |          |          |          |   |          |          |          |   |          |         |         |   |          |         |          |   |          |          |          |   |          |          |          |   |          |         |         |   |          |         |         |   |          |          |         |   |          |          |          |   |          |          |         |   |          |         |         |   |          |          |          |   |          |          |          |   |          |          |          |   |          |          |          |   |         |         |         |   |         |         |          |   |         |         |          |   |         |         |          |   |         |         |          |   |         |         |          |
| O                                              | 3.83766                                                                                                                                                                                                                                                                                                                                                                                                                                                                                                                                                                                                                                                                                                                                                                                                                                                                                                                                                                                                                                                                                                                                                                                                                                                                                                                                                                                                                                                                                                                                                                                                                                                                                                                                                                                                                                                                                                                                                                                                                                         | 1.19668  | -1.42390 |         |         |   |          |          |         |   |          |         |         |   |          |          |          |   |          |          |          |   |          |          |          |   |          |          |          |   |          |         |         |   |          |         |          |   |          |          |          |   |          |          |          |   |          |         |         |   |          |         |         |   |          |          |         |   |          |          |          |   |          |          |         |   |          |         |         |   |          |          |          |   |          |          |          |   |          |          |          |   |          |          |          |   |         |         |         |   |         |         |          |   |         |         |          |   |         |         |          |   |         |         |          |   |         |         |          |
| C                                              | 0.06758                                                                                                                                                                                                                                                                                                                                                                                                                                                                                                                                                                                                                                                                                                                                                                                                                                                                                                                                                                                                                                                                                                                                                                                                                                                                                                                                                                                                                                                                                                                                                                                                                                                                                                                                                                                                                                                                                                                                                                                                                                         | 3.14659  | -0.68380 |         |         |   |          |          |         |   |          |         |         |   |          |          |          |   |          |          |          |   |          |          |          |   |          |          |          |   |          |         |         |   |          |         |          |   |          |          |          |   |          |          |          |   |          |         |         |   |          |         |         |   |          |          |         |   |          |          |          |   |          |          |         |   |          |         |         |   |          |          |          |   |          |          |          |   |          |          |          |   |          |          |          |   |         |         |         |   |         |         |          |   |         |         |          |   |         |         |          |   |         |         |          |   |         |         |          |
| H                                              | 0.34748                                                                                                                                                                                                                                                                                                                                                                                                                                                                                                                                                                                                                                                                                                                                                                                                                                                                                                                                                                                                                                                                                                                                                                                                                                                                                                                                                                                                                                                                                                                                                                                                                                                                                                                                                                                                                                                                                                                                                                                                                                         | 4.20076  | -0.48246 |         |         |   |          |          |         |   |          |         |         |   |          |          |          |   |          |          |          |   |          |          |          |   |          |          |          |   |          |         |         |   |          |         |          |   |          |          |          |   |          |          |          |   |          |         |         |   |          |         |         |   |          |          |         |   |          |          |          |   |          |          |         |   |          |         |         |   |          |          |          |   |          |          |          |   |          |          |          |   |          |          |          |   |         |         |         |   |         |         |          |   |         |         |          |   |         |         |          |   |         |         |          |   |         |         |          |
| H                                              | 0.93302                                                                                                                                                                                                                                                                                                                                                                                                                                                                                                                                                                                                                                                                                                                                                                                                                                                                                                                                                                                                                                                                                                                                                                                                                                                                                                                                                                                                                                                                                                                                                                                                                                                                                                                                                                                                                                                                                                                                                                                                                                         | 2.68399  | -1.20822 |         |         |   |          |          |         |   |          |         |         |   |          |          |          |   |          |          |          |   |          |          |          |   |          |          |          |   |          |         |         |   |          |         |          |   |          |          |          |   |          |          |          |   |          |         |         |   |          |         |         |   |          |          |         |   |          |          |          |   |          |          |         |   |          |         |         |   |          |          |          |   |          |          |          |   |          |          |          |   |          |          |          |   |         |         |         |   |         |         |          |   |         |         |          |   |         |         |          |   |         |         |          |   |         |         |          |

|   |          |          |          |
|---|----------|----------|----------|
| H | -0.75411 | 3.17079  | -1.42846 |
| C | 2.22300  | 0.83641  | 0.29550  |
| C | 2.01233  | -0.58264 | -0.21455 |
| C | 3.12201  | -1.56085 | 0.21124  |
| H | 1.07548  | -0.96242 | 0.20654  |
| O | 1.81114  | -0.63197 | -1.63019 |
| C | 3.45494  | -2.64424 | -0.61209 |
| C | 3.77694  | -1.43790 | 1.44337  |
| C | 4.41601  | -3.57594 | -0.21753 |
| H | 2.95229  | -2.73557 | -1.56926 |
| C | 4.73661  | -2.36989 | 1.84299  |
| H | 3.54046  | -0.59339 | 2.08453  |
| C | 5.06176  | -3.44465 | 1.01367  |
| H | 4.66252  | -4.40719 | -0.87532 |
| H | 5.23564  | -2.25146 | 2.80277  |
| H | 5.81190  | -4.16981 | 1.32194  |
| H | 2.54712  | -0.09173 | -1.98668 |
| O | 3.55925  | 2.80089  | 0.14229  |
| C | 4.49271  | 3.57818  | -0.60110 |
| H | 4.61540  | 4.50746  | -0.03953 |
| H | 4.11664  | 3.79357  | -1.60681 |
| H | 5.45399  | 3.06251  | -0.69520 |
| H | 1.77409  | 2.41199  | 1.59823  |
| C | 0.58911  | 0.69557  | 2.26466  |
| H | 0.04657  | -0.13827 | 1.81130  |
| H | -0.14684 | 1.38895  | 2.67654  |
| H | 1.19254  | 0.29220  | 3.09251  |

Optimized Molecular Properties for **T1-product**

|                                                |                                                                                                                                                                                                                                                                                                                                                                                                                                                                                                                                                                                                                                                                                                                                                                                                                                                                                                                                                                                                                                                                                                                                                                                                                                                                                                                                                                                                                                                                                                                                                                                                                                                                                                                                                                                                                                                                                                                                                                                                                                       |          |          |   |         |         |          |   |         |          |          |   |         |          |          |   |         |          |         |   |         |         |         |   |         |         |         |   |         |         |         |   |         |         |          |   |         |         |         |   |         |         |         |   |         |          |         |   |         |         |          |   |         |         |          |   |         |          |          |   |         |          |          |   |         |          |          |   |         |          |          |   |         |         |         |   |         |          |         |   |         |         |         |   |         |         |         |   |          |         |          |   |          |          |          |   |          |          |          |   |         |         |          |   |         |         |          |   |         |         |          |
|------------------------------------------------|---------------------------------------------------------------------------------------------------------------------------------------------------------------------------------------------------------------------------------------------------------------------------------------------------------------------------------------------------------------------------------------------------------------------------------------------------------------------------------------------------------------------------------------------------------------------------------------------------------------------------------------------------------------------------------------------------------------------------------------------------------------------------------------------------------------------------------------------------------------------------------------------------------------------------------------------------------------------------------------------------------------------------------------------------------------------------------------------------------------------------------------------------------------------------------------------------------------------------------------------------------------------------------------------------------------------------------------------------------------------------------------------------------------------------------------------------------------------------------------------------------------------------------------------------------------------------------------------------------------------------------------------------------------------------------------------------------------------------------------------------------------------------------------------------------------------------------------------------------------------------------------------------------------------------------------------------------------------------------------------------------------------------------------|----------|----------|---|---------|---------|----------|---|---------|----------|----------|---|---------|----------|----------|---|---------|----------|---------|---|---------|---------|---------|---|---------|---------|---------|---|---------|---------|---------|---|---------|---------|----------|---|---------|---------|---------|---|---------|---------|---------|---|---------|----------|---------|---|---------|---------|----------|---|---------|---------|----------|---|---------|----------|----------|---|---------|----------|----------|---|---------|----------|----------|---|---------|----------|----------|---|---------|---------|---------|---|---------|----------|---------|---|---------|---------|---------|---|---------|---------|---------|---|----------|---------|----------|---|----------|----------|----------|---|----------|----------|----------|---|---------|---------|----------|---|---------|---------|----------|---|---------|---------|----------|
| Number of<br>(-)<br>Vibrational<br>Frequencies | 0                                                                                                                                                                                                                                                                                                                                                                                                                                                                                                                                                                                                                                                                                                                                                                                                                                                                                                                                                                                                                                                                                                                                                                                                                                                                                                                                                                                                                                                                                                                                                                                                                                                                                                                                                                                                                                                                                                                                                                                                                                     |          |          |   |         |         |          |   |         |          |          |   |         |          |          |   |         |          |         |   |         |         |         |   |         |         |         |   |         |         |         |   |         |         |          |   |         |         |         |   |         |         |         |   |         |          |         |   |         |         |          |   |         |         |          |   |         |          |          |   |         |          |          |   |         |          |          |   |         |          |          |   |         |         |         |   |         |          |         |   |         |         |         |   |         |         |         |   |          |         |          |   |          |          |          |   |          |          |          |   |         |         |          |   |         |         |          |   |         |         |          |
| Absolute<br>Energies<br>(Hartrees)             | <p><b>B3LYP/6-31G(d)</b></p> <p>There are 16 positive frequencies below 100 cm<sup>-1</sup>.</p> <p>Zero-point correction: 0.442742 hartree<br/>         Enthalpy correction: 0.476071 hartree<br/>         Free Energy correction: 0.368780 hartree<br/>         Quasiharmonic Free Energy correction: 0.384157 hartree</p> <p>SCF Energy: -1301.212243 hartree<br/>         SCF Energy + ZPVE: -1300.769501 hartree<br/>         Enthalpy: -1300.736172 hartree<br/>         Free Energy: -1300.843463 hartree</p> <p>Free Energy with quasiharmonic correction: -1300.828086 hartree<br/>         (correction: 9.65 kcal/mol)</p> <p><b>B3LYP-D3/6-311+G(d,p)</b></p> <p>SCF Done: E(RB3LYP) = -1301.67362745 A.U.</p>                                                                                                                                                                                                                                                                                                                                                                                                                                                                                                                                                                                                                                                                                                                                                                                                                                                                                                                                                                                                                                                                                                                                                                                                                                                                                                             |          |          |   |         |         |          |   |         |          |          |   |         |          |          |   |         |          |         |   |         |         |         |   |         |         |         |   |         |         |         |   |         |         |          |   |         |         |         |   |         |         |         |   |         |          |         |   |         |         |          |   |         |         |          |   |         |          |          |   |         |          |          |   |         |          |          |   |         |          |          |   |         |         |         |   |         |          |         |   |         |         |         |   |         |         |         |   |          |         |          |   |          |          |          |   |          |          |          |   |         |         |          |   |         |         |          |   |         |         |          |
| Cartesian<br>Coordinates                       | <p>54<br/>spD3-product-T1.out Energy: -816812.5267725</p> <table> <tbody> <tr><td>O</td><td>1.59025</td><td>3.94565</td><td>-1.47531</td></tr> <tr><td>C</td><td>3.92354</td><td>-3.06213</td><td>-0.34614</td></tr> <tr><td>O</td><td>3.25243</td><td>-2.45291</td><td>-1.21467</td></tr> <tr><td>O</td><td>4.46971</td><td>-2.56098</td><td>0.68665</td></tr> <tr><td>C</td><td>3.92892</td><td>0.94804</td><td>1.72572</td></tr> <tr><td>C</td><td>3.32889</td><td>2.10003</td><td>1.26741</td></tr> <tr><td>N</td><td>3.74288</td><td>0.01673</td><td>0.72942</td></tr> <tr><td>C</td><td>3.05797</td><td>0.61993</td><td>-0.26471</td></tr> <tr><td>N</td><td>2.78334</td><td>1.89175</td><td>0.01663</td></tr> <tr><td>H</td><td>3.26053</td><td>3.06122</td><td>1.76247</td></tr> <tr><td>H</td><td>4.04988</td><td>-1.01009</td><td>0.71759</td></tr> <tr><td>H</td><td>2.00446</td><td>3.17330</td><td>-0.99889</td></tr> <tr><td>H</td><td>2.78448</td><td>0.07940</td><td>-1.15918</td></tr> <tr><td>C</td><td>4.08312</td><td>-4.58823</td><td>-0.51241</td></tr> <tr><td>H</td><td>4.98727</td><td>-4.94930</td><td>-0.01194</td></tr> <tr><td>H</td><td>3.22131</td><td>-5.09355</td><td>-0.05546</td></tr> <tr><td>H</td><td>4.10281</td><td>-4.86081</td><td>-1.57273</td></tr> <tr><td>C</td><td>4.65321</td><td>0.64001</td><td>2.99686</td></tr> <tr><td>H</td><td>4.17454</td><td>-0.17724</td><td>3.55189</td></tr> <tr><td>H</td><td>5.69145</td><td>0.33390</td><td>2.81291</td></tr> <tr><td>H</td><td>4.67221</td><td>1.52275</td><td>3.64535</td></tr> <tr><td>C</td><td>-0.95195</td><td>1.35013</td><td>-0.35918</td></tr> <tr><td>C</td><td>-1.59217</td><td>-0.82818</td><td>-1.30641</td></tr> <tr><td>O</td><td>-2.41390</td><td>-1.54796</td><td>-1.87389</td></tr> <tr><td>C</td><td>2.37636</td><td>5.07629</td><td>-1.19857</td></tr> <tr><td>H</td><td>1.96300</td><td>5.92530</td><td>-1.75830</td></tr> <tr><td>H</td><td>2.38017</td><td>5.35584</td><td>-0.12888</td></tr> </tbody> </table> |          |          | O | 1.59025 | 3.94565 | -1.47531 | C | 3.92354 | -3.06213 | -0.34614 | O | 3.25243 | -2.45291 | -1.21467 | O | 4.46971 | -2.56098 | 0.68665 | C | 3.92892 | 0.94804 | 1.72572 | C | 3.32889 | 2.10003 | 1.26741 | N | 3.74288 | 0.01673 | 0.72942 | C | 3.05797 | 0.61993 | -0.26471 | N | 2.78334 | 1.89175 | 0.01663 | H | 3.26053 | 3.06122 | 1.76247 | H | 4.04988 | -1.01009 | 0.71759 | H | 2.00446 | 3.17330 | -0.99889 | H | 2.78448 | 0.07940 | -1.15918 | C | 4.08312 | -4.58823 | -0.51241 | H | 4.98727 | -4.94930 | -0.01194 | H | 3.22131 | -5.09355 | -0.05546 | H | 4.10281 | -4.86081 | -1.57273 | C | 4.65321 | 0.64001 | 2.99686 | H | 4.17454 | -0.17724 | 3.55189 | H | 5.69145 | 0.33390 | 2.81291 | H | 4.67221 | 1.52275 | 3.64535 | C | -0.95195 | 1.35013 | -0.35918 | C | -1.59217 | -0.82818 | -1.30641 | O | -2.41390 | -1.54796 | -1.87389 | C | 2.37636 | 5.07629 | -1.19857 | H | 1.96300 | 5.92530 | -1.75830 | H | 2.38017 | 5.35584 | -0.12888 |
| O                                              | 1.59025                                                                                                                                                                                                                                                                                                                                                                                                                                                                                                                                                                                                                                                                                                                                                                                                                                                                                                                                                                                                                                                                                                                                                                                                                                                                                                                                                                                                                                                                                                                                                                                                                                                                                                                                                                                                                                                                                                                                                                                                                               | 3.94565  | -1.47531 |   |         |         |          |   |         |          |          |   |         |          |          |   |         |          |         |   |         |         |         |   |         |         |         |   |         |         |         |   |         |         |          |   |         |         |         |   |         |         |         |   |         |          |         |   |         |         |          |   |         |         |          |   |         |          |          |   |         |          |          |   |         |          |          |   |         |          |          |   |         |         |         |   |         |          |         |   |         |         |         |   |         |         |         |   |          |         |          |   |          |          |          |   |          |          |          |   |         |         |          |   |         |         |          |   |         |         |          |
| C                                              | 3.92354                                                                                                                                                                                                                                                                                                                                                                                                                                                                                                                                                                                                                                                                                                                                                                                                                                                                                                                                                                                                                                                                                                                                                                                                                                                                                                                                                                                                                                                                                                                                                                                                                                                                                                                                                                                                                                                                                                                                                                                                                               | -3.06213 | -0.34614 |   |         |         |          |   |         |          |          |   |         |          |          |   |         |          |         |   |         |         |         |   |         |         |         |   |         |         |         |   |         |         |          |   |         |         |         |   |         |         |         |   |         |          |         |   |         |         |          |   |         |         |          |   |         |          |          |   |         |          |          |   |         |          |          |   |         |          |          |   |         |         |         |   |         |          |         |   |         |         |         |   |         |         |         |   |          |         |          |   |          |          |          |   |          |          |          |   |         |         |          |   |         |         |          |   |         |         |          |
| O                                              | 3.25243                                                                                                                                                                                                                                                                                                                                                                                                                                                                                                                                                                                                                                                                                                                                                                                                                                                                                                                                                                                                                                                                                                                                                                                                                                                                                                                                                                                                                                                                                                                                                                                                                                                                                                                                                                                                                                                                                                                                                                                                                               | -2.45291 | -1.21467 |   |         |         |          |   |         |          |          |   |         |          |          |   |         |          |         |   |         |         |         |   |         |         |         |   |         |         |         |   |         |         |          |   |         |         |         |   |         |         |         |   |         |          |         |   |         |         |          |   |         |         |          |   |         |          |          |   |         |          |          |   |         |          |          |   |         |          |          |   |         |         |         |   |         |          |         |   |         |         |         |   |         |         |         |   |          |         |          |   |          |          |          |   |          |          |          |   |         |         |          |   |         |         |          |   |         |         |          |
| O                                              | 4.46971                                                                                                                                                                                                                                                                                                                                                                                                                                                                                                                                                                                                                                                                                                                                                                                                                                                                                                                                                                                                                                                                                                                                                                                                                                                                                                                                                                                                                                                                                                                                                                                                                                                                                                                                                                                                                                                                                                                                                                                                                               | -2.56098 | 0.68665  |   |         |         |          |   |         |          |          |   |         |          |          |   |         |          |         |   |         |         |         |   |         |         |         |   |         |         |         |   |         |         |          |   |         |         |         |   |         |         |         |   |         |          |         |   |         |         |          |   |         |         |          |   |         |          |          |   |         |          |          |   |         |          |          |   |         |          |          |   |         |         |         |   |         |          |         |   |         |         |         |   |         |         |         |   |          |         |          |   |          |          |          |   |          |          |          |   |         |         |          |   |         |         |          |   |         |         |          |
| C                                              | 3.92892                                                                                                                                                                                                                                                                                                                                                                                                                                                                                                                                                                                                                                                                                                                                                                                                                                                                                                                                                                                                                                                                                                                                                                                                                                                                                                                                                                                                                                                                                                                                                                                                                                                                                                                                                                                                                                                                                                                                                                                                                               | 0.94804  | 1.72572  |   |         |         |          |   |         |          |          |   |         |          |          |   |         |          |         |   |         |         |         |   |         |         |         |   |         |         |         |   |         |         |          |   |         |         |         |   |         |         |         |   |         |          |         |   |         |         |          |   |         |         |          |   |         |          |          |   |         |          |          |   |         |          |          |   |         |          |          |   |         |         |         |   |         |          |         |   |         |         |         |   |         |         |         |   |          |         |          |   |          |          |          |   |          |          |          |   |         |         |          |   |         |         |          |   |         |         |          |
| C                                              | 3.32889                                                                                                                                                                                                                                                                                                                                                                                                                                                                                                                                                                                                                                                                                                                                                                                                                                                                                                                                                                                                                                                                                                                                                                                                                                                                                                                                                                                                                                                                                                                                                                                                                                                                                                                                                                                                                                                                                                                                                                                                                               | 2.10003  | 1.26741  |   |         |         |          |   |         |          |          |   |         |          |          |   |         |          |         |   |         |         |         |   |         |         |         |   |         |         |         |   |         |         |          |   |         |         |         |   |         |         |         |   |         |          |         |   |         |         |          |   |         |         |          |   |         |          |          |   |         |          |          |   |         |          |          |   |         |          |          |   |         |         |         |   |         |          |         |   |         |         |         |   |         |         |         |   |          |         |          |   |          |          |          |   |          |          |          |   |         |         |          |   |         |         |          |   |         |         |          |
| N                                              | 3.74288                                                                                                                                                                                                                                                                                                                                                                                                                                                                                                                                                                                                                                                                                                                                                                                                                                                                                                                                                                                                                                                                                                                                                                                                                                                                                                                                                                                                                                                                                                                                                                                                                                                                                                                                                                                                                                                                                                                                                                                                                               | 0.01673  | 0.72942  |   |         |         |          |   |         |          |          |   |         |          |          |   |         |          |         |   |         |         |         |   |         |         |         |   |         |         |         |   |         |         |          |   |         |         |         |   |         |         |         |   |         |          |         |   |         |         |          |   |         |         |          |   |         |          |          |   |         |          |          |   |         |          |          |   |         |          |          |   |         |         |         |   |         |          |         |   |         |         |         |   |         |         |         |   |          |         |          |   |          |          |          |   |          |          |          |   |         |         |          |   |         |         |          |   |         |         |          |
| C                                              | 3.05797                                                                                                                                                                                                                                                                                                                                                                                                                                                                                                                                                                                                                                                                                                                                                                                                                                                                                                                                                                                                                                                                                                                                                                                                                                                                                                                                                                                                                                                                                                                                                                                                                                                                                                                                                                                                                                                                                                                                                                                                                               | 0.61993  | -0.26471 |   |         |         |          |   |         |          |          |   |         |          |          |   |         |          |         |   |         |         |         |   |         |         |         |   |         |         |         |   |         |         |          |   |         |         |         |   |         |         |         |   |         |          |         |   |         |         |          |   |         |         |          |   |         |          |          |   |         |          |          |   |         |          |          |   |         |          |          |   |         |         |         |   |         |          |         |   |         |         |         |   |         |         |         |   |          |         |          |   |          |          |          |   |          |          |          |   |         |         |          |   |         |         |          |   |         |         |          |
| N                                              | 2.78334                                                                                                                                                                                                                                                                                                                                                                                                                                                                                                                                                                                                                                                                                                                                                                                                                                                                                                                                                                                                                                                                                                                                                                                                                                                                                                                                                                                                                                                                                                                                                                                                                                                                                                                                                                                                                                                                                                                                                                                                                               | 1.89175  | 0.01663  |   |         |         |          |   |         |          |          |   |         |          |          |   |         |          |         |   |         |         |         |   |         |         |         |   |         |         |         |   |         |         |          |   |         |         |         |   |         |         |         |   |         |          |         |   |         |         |          |   |         |         |          |   |         |          |          |   |         |          |          |   |         |          |          |   |         |          |          |   |         |         |         |   |         |          |         |   |         |         |         |   |         |         |         |   |          |         |          |   |          |          |          |   |          |          |          |   |         |         |          |   |         |         |          |   |         |         |          |
| H                                              | 3.26053                                                                                                                                                                                                                                                                                                                                                                                                                                                                                                                                                                                                                                                                                                                                                                                                                                                                                                                                                                                                                                                                                                                                                                                                                                                                                                                                                                                                                                                                                                                                                                                                                                                                                                                                                                                                                                                                                                                                                                                                                               | 3.06122  | 1.76247  |   |         |         |          |   |         |          |          |   |         |          |          |   |         |          |         |   |         |         |         |   |         |         |         |   |         |         |         |   |         |         |          |   |         |         |         |   |         |         |         |   |         |          |         |   |         |         |          |   |         |         |          |   |         |          |          |   |         |          |          |   |         |          |          |   |         |          |          |   |         |         |         |   |         |          |         |   |         |         |         |   |         |         |         |   |          |         |          |   |          |          |          |   |          |          |          |   |         |         |          |   |         |         |          |   |         |         |          |
| H                                              | 4.04988                                                                                                                                                                                                                                                                                                                                                                                                                                                                                                                                                                                                                                                                                                                                                                                                                                                                                                                                                                                                                                                                                                                                                                                                                                                                                                                                                                                                                                                                                                                                                                                                                                                                                                                                                                                                                                                                                                                                                                                                                               | -1.01009 | 0.71759  |   |         |         |          |   |         |          |          |   |         |          |          |   |         |          |         |   |         |         |         |   |         |         |         |   |         |         |         |   |         |         |          |   |         |         |         |   |         |         |         |   |         |          |         |   |         |         |          |   |         |         |          |   |         |          |          |   |         |          |          |   |         |          |          |   |         |          |          |   |         |         |         |   |         |          |         |   |         |         |         |   |         |         |         |   |          |         |          |   |          |          |          |   |          |          |          |   |         |         |          |   |         |         |          |   |         |         |          |
| H                                              | 2.00446                                                                                                                                                                                                                                                                                                                                                                                                                                                                                                                                                                                                                                                                                                                                                                                                                                                                                                                                                                                                                                                                                                                                                                                                                                                                                                                                                                                                                                                                                                                                                                                                                                                                                                                                                                                                                                                                                                                                                                                                                               | 3.17330  | -0.99889 |   |         |         |          |   |         |          |          |   |         |          |          |   |         |          |         |   |         |         |         |   |         |         |         |   |         |         |         |   |         |         |          |   |         |         |         |   |         |         |         |   |         |          |         |   |         |         |          |   |         |         |          |   |         |          |          |   |         |          |          |   |         |          |          |   |         |          |          |   |         |         |         |   |         |          |         |   |         |         |         |   |         |         |         |   |          |         |          |   |          |          |          |   |          |          |          |   |         |         |          |   |         |         |          |   |         |         |          |
| H                                              | 2.78448                                                                                                                                                                                                                                                                                                                                                                                                                                                                                                                                                                                                                                                                                                                                                                                                                                                                                                                                                                                                                                                                                                                                                                                                                                                                                                                                                                                                                                                                                                                                                                                                                                                                                                                                                                                                                                                                                                                                                                                                                               | 0.07940  | -1.15918 |   |         |         |          |   |         |          |          |   |         |          |          |   |         |          |         |   |         |         |         |   |         |         |         |   |         |         |         |   |         |         |          |   |         |         |         |   |         |         |         |   |         |          |         |   |         |         |          |   |         |         |          |   |         |          |          |   |         |          |          |   |         |          |          |   |         |          |          |   |         |         |         |   |         |          |         |   |         |         |         |   |         |         |         |   |          |         |          |   |          |          |          |   |          |          |          |   |         |         |          |   |         |         |          |   |         |         |          |
| C                                              | 4.08312                                                                                                                                                                                                                                                                                                                                                                                                                                                                                                                                                                                                                                                                                                                                                                                                                                                                                                                                                                                                                                                                                                                                                                                                                                                                                                                                                                                                                                                                                                                                                                                                                                                                                                                                                                                                                                                                                                                                                                                                                               | -4.58823 | -0.51241 |   |         |         |          |   |         |          |          |   |         |          |          |   |         |          |         |   |         |         |         |   |         |         |         |   |         |         |         |   |         |         |          |   |         |         |         |   |         |         |         |   |         |          |         |   |         |         |          |   |         |         |          |   |         |          |          |   |         |          |          |   |         |          |          |   |         |          |          |   |         |         |         |   |         |          |         |   |         |         |         |   |         |         |         |   |          |         |          |   |          |          |          |   |          |          |          |   |         |         |          |   |         |         |          |   |         |         |          |
| H                                              | 4.98727                                                                                                                                                                                                                                                                                                                                                                                                                                                                                                                                                                                                                                                                                                                                                                                                                                                                                                                                                                                                                                                                                                                                                                                                                                                                                                                                                                                                                                                                                                                                                                                                                                                                                                                                                                                                                                                                                                                                                                                                                               | -4.94930 | -0.01194 |   |         |         |          |   |         |          |          |   |         |          |          |   |         |          |         |   |         |         |         |   |         |         |         |   |         |         |         |   |         |         |          |   |         |         |         |   |         |         |         |   |         |          |         |   |         |         |          |   |         |         |          |   |         |          |          |   |         |          |          |   |         |          |          |   |         |          |          |   |         |         |         |   |         |          |         |   |         |         |         |   |         |         |         |   |          |         |          |   |          |          |          |   |          |          |          |   |         |         |          |   |         |         |          |   |         |         |          |
| H                                              | 3.22131                                                                                                                                                                                                                                                                                                                                                                                                                                                                                                                                                                                                                                                                                                                                                                                                                                                                                                                                                                                                                                                                                                                                                                                                                                                                                                                                                                                                                                                                                                                                                                                                                                                                                                                                                                                                                                                                                                                                                                                                                               | -5.09355 | -0.05546 |   |         |         |          |   |         |          |          |   |         |          |          |   |         |          |         |   |         |         |         |   |         |         |         |   |         |         |         |   |         |         |          |   |         |         |         |   |         |         |         |   |         |          |         |   |         |         |          |   |         |         |          |   |         |          |          |   |         |          |          |   |         |          |          |   |         |          |          |   |         |         |         |   |         |          |         |   |         |         |         |   |         |         |         |   |          |         |          |   |          |          |          |   |          |          |          |   |         |         |          |   |         |         |          |   |         |         |          |
| H                                              | 4.10281                                                                                                                                                                                                                                                                                                                                                                                                                                                                                                                                                                                                                                                                                                                                                                                                                                                                                                                                                                                                                                                                                                                                                                                                                                                                                                                                                                                                                                                                                                                                                                                                                                                                                                                                                                                                                                                                                                                                                                                                                               | -4.86081 | -1.57273 |   |         |         |          |   |         |          |          |   |         |          |          |   |         |          |         |   |         |         |         |   |         |         |         |   |         |         |         |   |         |         |          |   |         |         |         |   |         |         |         |   |         |          |         |   |         |         |          |   |         |         |          |   |         |          |          |   |         |          |          |   |         |          |          |   |         |          |          |   |         |         |         |   |         |          |         |   |         |         |         |   |         |         |         |   |          |         |          |   |          |          |          |   |          |          |          |   |         |         |          |   |         |         |          |   |         |         |          |
| C                                              | 4.65321                                                                                                                                                                                                                                                                                                                                                                                                                                                                                                                                                                                                                                                                                                                                                                                                                                                                                                                                                                                                                                                                                                                                                                                                                                                                                                                                                                                                                                                                                                                                                                                                                                                                                                                                                                                                                                                                                                                                                                                                                               | 0.64001  | 2.99686  |   |         |         |          |   |         |          |          |   |         |          |          |   |         |          |         |   |         |         |         |   |         |         |         |   |         |         |         |   |         |         |          |   |         |         |         |   |         |         |         |   |         |          |         |   |         |         |          |   |         |         |          |   |         |          |          |   |         |          |          |   |         |          |          |   |         |          |          |   |         |         |         |   |         |          |         |   |         |         |         |   |         |         |         |   |          |         |          |   |          |          |          |   |          |          |          |   |         |         |          |   |         |         |          |   |         |         |          |
| H                                              | 4.17454                                                                                                                                                                                                                                                                                                                                                                                                                                                                                                                                                                                                                                                                                                                                                                                                                                                                                                                                                                                                                                                                                                                                                                                                                                                                                                                                                                                                                                                                                                                                                                                                                                                                                                                                                                                                                                                                                                                                                                                                                               | -0.17724 | 3.55189  |   |         |         |          |   |         |          |          |   |         |          |          |   |         |          |         |   |         |         |         |   |         |         |         |   |         |         |         |   |         |         |          |   |         |         |         |   |         |         |         |   |         |          |         |   |         |         |          |   |         |         |          |   |         |          |          |   |         |          |          |   |         |          |          |   |         |          |          |   |         |         |         |   |         |          |         |   |         |         |         |   |         |         |         |   |          |         |          |   |          |          |          |   |          |          |          |   |         |         |          |   |         |         |          |   |         |         |          |
| H                                              | 5.69145                                                                                                                                                                                                                                                                                                                                                                                                                                                                                                                                                                                                                                                                                                                                                                                                                                                                                                                                                                                                                                                                                                                                                                                                                                                                                                                                                                                                                                                                                                                                                                                                                                                                                                                                                                                                                                                                                                                                                                                                                               | 0.33390  | 2.81291  |   |         |         |          |   |         |          |          |   |         |          |          |   |         |          |         |   |         |         |         |   |         |         |         |   |         |         |         |   |         |         |          |   |         |         |         |   |         |         |         |   |         |          |         |   |         |         |          |   |         |         |          |   |         |          |          |   |         |          |          |   |         |          |          |   |         |          |          |   |         |         |         |   |         |          |         |   |         |         |         |   |         |         |         |   |          |         |          |   |          |          |          |   |          |          |          |   |         |         |          |   |         |         |          |   |         |         |          |
| H                                              | 4.67221                                                                                                                                                                                                                                                                                                                                                                                                                                                                                                                                                                                                                                                                                                                                                                                                                                                                                                                                                                                                                                                                                                                                                                                                                                                                                                                                                                                                                                                                                                                                                                                                                                                                                                                                                                                                                                                                                                                                                                                                                               | 1.52275  | 3.64535  |   |         |         |          |   |         |          |          |   |         |          |          |   |         |          |         |   |         |         |         |   |         |         |         |   |         |         |         |   |         |         |          |   |         |         |         |   |         |         |         |   |         |          |         |   |         |         |          |   |         |         |          |   |         |          |          |   |         |          |          |   |         |          |          |   |         |          |          |   |         |         |         |   |         |          |         |   |         |         |         |   |         |         |         |   |          |         |          |   |          |          |          |   |          |          |          |   |         |         |          |   |         |         |          |   |         |         |          |
| C                                              | -0.95195                                                                                                                                                                                                                                                                                                                                                                                                                                                                                                                                                                                                                                                                                                                                                                                                                                                                                                                                                                                                                                                                                                                                                                                                                                                                                                                                                                                                                                                                                                                                                                                                                                                                                                                                                                                                                                                                                                                                                                                                                              | 1.35013  | -0.35918 |   |         |         |          |   |         |          |          |   |         |          |          |   |         |          |         |   |         |         |         |   |         |         |         |   |         |         |         |   |         |         |          |   |         |         |         |   |         |         |         |   |         |          |         |   |         |         |          |   |         |         |          |   |         |          |          |   |         |          |          |   |         |          |          |   |         |          |          |   |         |         |         |   |         |          |         |   |         |         |         |   |         |         |         |   |          |         |          |   |          |          |          |   |          |          |          |   |         |         |          |   |         |         |          |   |         |         |          |
| C                                              | -1.59217                                                                                                                                                                                                                                                                                                                                                                                                                                                                                                                                                                                                                                                                                                                                                                                                                                                                                                                                                                                                                                                                                                                                                                                                                                                                                                                                                                                                                                                                                                                                                                                                                                                                                                                                                                                                                                                                                                                                                                                                                              | -0.82818 | -1.30641 |   |         |         |          |   |         |          |          |   |         |          |          |   |         |          |         |   |         |         |         |   |         |         |         |   |         |         |         |   |         |         |          |   |         |         |         |   |         |         |         |   |         |          |         |   |         |         |          |   |         |         |          |   |         |          |          |   |         |          |          |   |         |          |          |   |         |          |          |   |         |         |         |   |         |          |         |   |         |         |         |   |         |         |         |   |          |         |          |   |          |          |          |   |          |          |          |   |         |         |          |   |         |         |          |   |         |         |          |
| O                                              | -2.41390                                                                                                                                                                                                                                                                                                                                                                                                                                                                                                                                                                                                                                                                                                                                                                                                                                                                                                                                                                                                                                                                                                                                                                                                                                                                                                                                                                                                                                                                                                                                                                                                                                                                                                                                                                                                                                                                                                                                                                                                                              | -1.54796 | -1.87389 |   |         |         |          |   |         |          |          |   |         |          |          |   |         |          |         |   |         |         |         |   |         |         |         |   |         |         |         |   |         |         |          |   |         |         |         |   |         |         |         |   |         |          |         |   |         |         |          |   |         |         |          |   |         |          |          |   |         |          |          |   |         |          |          |   |         |          |          |   |         |         |         |   |         |          |         |   |         |         |         |   |         |         |         |   |          |         |          |   |          |          |          |   |          |          |          |   |         |         |          |   |         |         |          |   |         |         |          |
| C                                              | 2.37636                                                                                                                                                                                                                                                                                                                                                                                                                                                                                                                                                                                                                                                                                                                                                                                                                                                                                                                                                                                                                                                                                                                                                                                                                                                                                                                                                                                                                                                                                                                                                                                                                                                                                                                                                                                                                                                                                                                                                                                                                               | 5.07629  | -1.19857 |   |         |         |          |   |         |          |          |   |         |          |          |   |         |          |         |   |         |         |         |   |         |         |         |   |         |         |         |   |         |         |          |   |         |         |         |   |         |         |         |   |         |          |         |   |         |         |          |   |         |         |          |   |         |          |          |   |         |          |          |   |         |          |          |   |         |          |          |   |         |         |         |   |         |          |         |   |         |         |         |   |         |         |         |   |          |         |          |   |          |          |          |   |          |          |          |   |         |         |          |   |         |         |          |   |         |         |          |
| H                                              | 1.96300                                                                                                                                                                                                                                                                                                                                                                                                                                                                                                                                                                                                                                                                                                                                                                                                                                                                                                                                                                                                                                                                                                                                                                                                                                                                                                                                                                                                                                                                                                                                                                                                                                                                                                                                                                                                                                                                                                                                                                                                                               | 5.92530  | -1.75830 |   |         |         |          |   |         |          |          |   |         |          |          |   |         |          |         |   |         |         |         |   |         |         |         |   |         |         |         |   |         |         |          |   |         |         |         |   |         |         |         |   |         |          |         |   |         |         |          |   |         |         |          |   |         |          |          |   |         |          |          |   |         |          |          |   |         |          |          |   |         |         |         |   |         |          |         |   |         |         |         |   |         |         |         |   |          |         |          |   |          |          |          |   |          |          |          |   |         |         |          |   |         |         |          |   |         |         |          |
| H                                              | 2.38017                                                                                                                                                                                                                                                                                                                                                                                                                                                                                                                                                                                                                                                                                                                                                                                                                                                                                                                                                                                                                                                                                                                                                                                                                                                                                                                                                                                                                                                                                                                                                                                                                                                                                                                                                                                                                                                                                                                                                                                                                               | 5.35584  | -0.12888 |   |         |         |          |   |         |          |          |   |         |          |          |   |         |          |         |   |         |         |         |   |         |         |         |   |         |         |         |   |         |         |          |   |         |         |         |   |         |         |         |   |         |          |         |   |         |         |          |   |         |         |          |   |         |          |          |   |         |          |          |   |         |          |          |   |         |          |          |   |         |         |         |   |         |          |         |   |         |         |         |   |         |         |         |   |          |         |          |   |          |          |          |   |          |          |          |   |         |         |          |   |         |         |          |   |         |         |          |

|   |          |          |          |
|---|----------|----------|----------|
| H | 3.42864  | 4.95262  | -1.50796 |
| C | -1.93164 | 0.51860  | -0.76443 |
| C | -3.42375 | 0.83828  | -0.74340 |
| C | -4.17108 | 0.09178  | 0.37511  |
| H | -3.54064 | 1.90952  | -0.54800 |
| O | -4.02839 | 0.63387  | -2.01511 |
| C | -5.47031 | -0.37892 | 0.15312  |
| C | -3.60447 | -0.07986 | 1.64498  |
| C | -6.18468 | -1.01028 | 1.17240  |
| H | -5.90704 | -0.24490 | -0.83086 |
| C | -4.31829 | -0.70837 | 2.66655  |
| H | -2.59262 | 0.26872  | 1.83242  |
| C | -5.61233 | -1.17778 | 2.43454  |
| H | -7.19126 | -1.37481 | 0.97829  |
| H | -3.85736 | -0.83781 | 3.64312  |
| H | -6.16701 | -1.67258 | 3.22848  |
| H | -3.75502 | -0.27361 | -2.26435 |
| O | -0.31750 | -1.18401 | -1.13268 |
| C | 0.09393  | -2.45096 | -1.69233 |
| H | 1.16877  | -2.52264 | -1.50569 |
| H | -0.12711 | -2.47049 | -2.76351 |
| H | -0.45577 | -3.26218 | -1.20517 |
| C | -1.06661 | 2.74205  | 0.17691  |
| H | 0.07064  | 0.98527  | -0.42336 |
| H | -0.71051 | 2.76436  | 1.21693  |
| H | -2.08186 | 3.14813  | 0.15431  |
| H | -0.39039 | 3.39828  | -0.38802 |

Optimized Molecular Properties for **T2-complex/T3-complex/T4-complex/T5-complex**

|                                                |                                                                                                                                                                                                                                                                                                                                                                                                                                                                                                                                                                                                                                                                                                                            |                         |                   |
|------------------------------------------------|----------------------------------------------------------------------------------------------------------------------------------------------------------------------------------------------------------------------------------------------------------------------------------------------------------------------------------------------------------------------------------------------------------------------------------------------------------------------------------------------------------------------------------------------------------------------------------------------------------------------------------------------------------------------------------------------------------------------------|-------------------------|-------------------|
| Number of<br>(-)<br>Vibrational<br>Frequencies | 0                                                                                                                                                                                                                                                                                                                                                                                                                                                                                                                                                                                                                                                                                                                          |                         |                   |
| Absolute<br>Energies<br>(Hartrees)             | <p><b>B3LYP/6-31G(d)</b></p> <p>There are 22 positive frequencies below 100 cm<sup>-1</sup>.</p> <p>Zero-point correction: 0.488701 hartree<br/>         Enthalpy correction: 0.527900 hartree<br/>         Free Energy correction: 0.405268 hartree<br/>         Quasiharmonic Free Energy correction: 0.423911 hartree</p> <p>SCF Energy: -1412.193468 hartree<br/>         SCF Energy + ZPVE: -1411.704767 hartree<br/>         Enthalpy: -1411.665568 hartree<br/>         Free Energy: -1411.788200 hartree</p> <p>Free Energy with quasiharmonic correction: -1411.769557 hartree<br/>         (correction: 11.70 kcal/mol)</p> <p><b>B3LYP-D3/6-311+G(d,p)</b></p> <p>SCF Done: E(RB3LYP) = -1412.70783046 A.U.</p> |                         |                   |
| Cartesian<br>Coordinates                       | 59<br>spD3-complex-T2.out                                                                                                                                                                                                                                                                                                                                                                                                                                                                                                                                                                                                                                                                                                  | Energy: -886487.5405441 |                   |
|                                                | O                                                                                                                                                                                                                                                                                                                                                                                                                                                                                                                                                                                                                                                                                                                          | 3.80874                 | -3.52187 1.22908  |
|                                                | C                                                                                                                                                                                                                                                                                                                                                                                                                                                                                                                                                                                                                                                                                                                          | 1.12662                 | 3.64412 0.74007   |
|                                                | O                                                                                                                                                                                                                                                                                                                                                                                                                                                                                                                                                                                                                                                                                                                          | 0.44494                 | 2.58359 0.71901   |
|                                                | O                                                                                                                                                                                                                                                                                                                                                                                                                                                                                                                                                                                                                                                                                                                          | 2.36056                 | 3.75590 0.47045   |
|                                                | C                                                                                                                                                                                                                                                                                                                                                                                                                                                                                                                                                                                                                                                                                                                          | 4.79540                 | 1.09685 -0.17629  |
|                                                | C                                                                                                                                                                                                                                                                                                                                                                                                                                                                                                                                                                                                                                                                                                                          | 4.95360                 | -0.26572 -0.05722 |
|                                                | N                                                                                                                                                                                                                                                                                                                                                                                                                                                                                                                                                                                                                                                                                                                          | 3.49487                 | 1.34889 0.20001   |
|                                                | C                                                                                                                                                                                                                                                                                                                                                                                                                                                                                                                                                                                                                                                                                                                          | 2.93357                 | 0.16531 0.52626   |
|                                                | N                                                                                                                                                                                                                                                                                                                                                                                                                                                                                                                                                                                                                                                                                                                          | 3.78293                 | -0.84833 0.38344  |
|                                                | H                                                                                                                                                                                                                                                                                                                                                                                                                                                                                                                                                                                                                                                                                                                          | 5.83676                 | -0.85891 -0.25934 |
|                                                | H                                                                                                                                                                                                                                                                                                                                                                                                                                                                                                                                                                                                                                                                                                                          | 1.90788                 | 0.10152 0.86032   |
|                                                | C                                                                                                                                                                                                                                                                                                                                                                                                                                                                                                                                                                                                                                                                                                                          | 0.39196                 | 4.94346 1.11968   |
|                                                | H                                                                                                                                                                                                                                                                                                                                                                                                                                                                                                                                                                                                                                                                                                                          | 1.09039                 | 5.77570 1.24419   |
|                                                | H                                                                                                                                                                                                                                                                                                                                                                                                                                                                                                                                                                                                                                                                                                                          | -0.33154                | 5.19988 0.33523   |
|                                                | H                                                                                                                                                                                                                                                                                                                                                                                                                                                                                                                                                                                                                                                                                                                          | -0.17786                | 4.79481 2.04390   |
|                                                | C                                                                                                                                                                                                                                                                                                                                                                                                                                                                                                                                                                                                                                                                                                                          | 5.73592                 | 2.17684 -0.60550  |
|                                                | H                                                                                                                                                                                                                                                                                                                                                                                                                                                                                                                                                                                                                                                                                                                          | 6.72246                 | 1.75389 -0.82323  |
|                                                | H                                                                                                                                                                                                                                                                                                                                                                                                                                                                                                                                                                                                                                                                                                                          | 5.38351                 | 2.69297 -1.50818  |
|                                                | H                                                                                                                                                                                                                                                                                                                                                                                                                                                                                                                                                                                                                                                                                                                          | 5.85838                 | 2.94245 0.17113   |
|                                                | C                                                                                                                                                                                                                                                                                                                                                                                                                                                                                                                                                                                                                                                                                                                          | 1.29190                 | -2.94214 -1.47120 |
|                                                | C                                                                                                                                                                                                                                                                                                                                                                                                                                                                                                                                                                                                                                                                                                                          | -0.46273                | -1.17860 -1.54718 |
|                                                | O                                                                                                                                                                                                                                                                                                                                                                                                                                                                                                                                                                                                                                                                                                                          | -1.60652                | -0.82671 -1.25848 |
|                                                | C                                                                                                                                                                                                                                                                                                                                                                                                                                                                                                                                                                                                                                                                                                                          | 3.37110                 | -3.50024 2.56720  |
|                                                | H                                                                                                                                                                                                                                                                                                                                                                                                                                                                                                                                                                                                                                                                                                                          | 3.98261                 | -2.83773 3.20262  |
|                                                | H                                                                                                                                                                                                                                                                                                                                                                                                                                                                                                                                                                                                                                                                                                                          | 2.31959                 | -3.18224 2.67479  |
|                                                | H                                                                                                                                                                                                                                                                                                                                                                                                                                                                                                                                                                                                                                                                                                                          | 3.45304                 | -4.51813 2.96864  |
|                                                | C                                                                                                                                                                                                                                                                                                                                                                                                                                                                                                                                                                                                                                                                                                                          | 0.00303                 | -2.57163 -1.42347 |



|   |          |          |          |
|---|----------|----------|----------|
| H | -0.78657 | -3.29276 | -1.22595 |
| O | 0.46599  | -0.34063 | -2.00944 |
| C | 0.12671  | 1.06591  | -2.07669 |
| H | 0.86940  | 1.49916  | -2.74808 |
| H | 0.20743  | 1.52122  | -1.08304 |
| H | -0.88026 | 1.18724  | -2.48228 |
| H | 2.04665  | -2.17358 | -1.62515 |
| C | 1.79360  | -4.33374 | -1.26492 |
| H | 2.38909  | -4.66094 | -2.12897 |
| H | 2.46544  | -4.34702 | -0.39365 |
| H | 0.97750  | -5.04878 | -1.11287 |
| C | -4.72785 | 1.32844  | -0.20424 |
| O | -5.55273 | 2.23337  | -0.32700 |
| C | -5.17967 | -0.12756 | -0.41837 |
| N | -4.24292 | -1.17388 | -0.06000 |
| H | -6.07611 | -0.27668 | 0.18662  |
| H | -5.47507 | -0.21758 | -1.47222 |
| H | -3.36674 | -1.24977 | -0.57020 |
| C | -4.47579 | -2.02622 | 0.98120  |
| O | -5.50392 | -2.01833 | 1.65315  |
| C | -3.35912 | -3.02900 | 1.24648  |
| H | -3.70422 | -4.03273 | 0.97310  |
| H | -3.14751 | -3.03763 | 2.31954  |
| H | -2.43910 | -2.80492 | 0.69962  |
| N | -3.42636 | 1.53764  | 0.09572  |
| H | -2.77657 | 0.76360  | 0.07371  |
| C | -2.89240 | 2.87822  | 0.28896  |
| H | -3.04165 | 3.48921  | -0.61019 |
| H | -3.41344 | 3.37557  | 1.11477  |
| H | -1.82377 | 2.80634  | 0.51400  |
| H | 3.01275  | 2.30124  | 0.27066  |
| H | 3.76624  | -2.58413 | 0.89379  |

Optimized Molecular Properties for **T2-TS1/T3-TS1/T4-TS1/T5-TS1**

|                                                |                                                                                                                                                                                                                                                                                                                                                                                                                                                                                                                                                                                                                                                                                                                                                                                                                                                                                                                                                                                                                                                                                                                                                                                                                                                                                                                                                                                                                                                                                                                                                                                                                                                                                                                                                                                                                                                                                                                                                                                                                     |          |          |   |         |          |         |   |         |         |         |   |         |         |         |   |         |         |         |   |         |         |         |   |         |          |         |   |         |         |         |   |         |          |         |   |         |          |         |   |         |          |         |   |         |         |         |   |         |         |         |   |         |         |         |   |         |         |          |   |         |         |         |   |         |         |         |   |         |         |         |   |         |         |          |   |         |         |         |   |         |          |          |   |          |          |          |   |          |          |          |   |         |          |         |   |         |          |         |   |         |          |         |   |         |          |         |   |          |          |          |
|------------------------------------------------|---------------------------------------------------------------------------------------------------------------------------------------------------------------------------------------------------------------------------------------------------------------------------------------------------------------------------------------------------------------------------------------------------------------------------------------------------------------------------------------------------------------------------------------------------------------------------------------------------------------------------------------------------------------------------------------------------------------------------------------------------------------------------------------------------------------------------------------------------------------------------------------------------------------------------------------------------------------------------------------------------------------------------------------------------------------------------------------------------------------------------------------------------------------------------------------------------------------------------------------------------------------------------------------------------------------------------------------------------------------------------------------------------------------------------------------------------------------------------------------------------------------------------------------------------------------------------------------------------------------------------------------------------------------------------------------------------------------------------------------------------------------------------------------------------------------------------------------------------------------------------------------------------------------------------------------------------------------------------------------------------------------------|----------|----------|---|---------|----------|---------|---|---------|---------|---------|---|---------|---------|---------|---|---------|---------|---------|---|---------|---------|---------|---|---------|----------|---------|---|---------|---------|---------|---|---------|----------|---------|---|---------|----------|---------|---|---------|----------|---------|---|---------|---------|---------|---|---------|---------|---------|---|---------|---------|---------|---|---------|---------|----------|---|---------|---------|---------|---|---------|---------|---------|---|---------|---------|---------|---|---------|---------|----------|---|---------|---------|---------|---|---------|----------|----------|---|----------|----------|----------|---|----------|----------|----------|---|---------|----------|---------|---|---------|----------|---------|---|---------|----------|---------|---|---------|----------|---------|---|----------|----------|----------|
| Number of<br>(-)<br>Vibrational<br>Frequencies | 1 (-254.4283)                                                                                                                                                                                                                                                                                                                                                                                                                                                                                                                                                                                                                                                                                                                                                                                                                                                                                                                                                                                                                                                                                                                                                                                                                                                                                                                                                                                                                                                                                                                                                                                                                                                                                                                                                                                                                                                                                                                                                                                                       |          |          |   |         |          |         |   |         |         |         |   |         |         |         |   |         |         |         |   |         |         |         |   |         |          |         |   |         |         |         |   |         |          |         |   |         |          |         |   |         |          |         |   |         |         |         |   |         |         |         |   |         |         |         |   |         |         |          |   |         |         |         |   |         |         |         |   |         |         |         |   |         |         |          |   |         |         |         |   |         |          |          |   |          |          |          |   |          |          |          |   |         |          |         |   |         |          |         |   |         |          |         |   |         |          |         |   |          |          |          |
| Absolute<br>Energies<br>(Hartrees)             | <p><b>B3LYP/6-31G(d)</b></p> <p>There are 19 positive frequencies below 100 cm<sup>-1</sup>.</p> <p>Zero-point correction: 0.484991 hartree<br/>           Enthalpy correction: 0.522405 hartree<br/>           Free Energy correction: 0.406828 hartree<br/>           Quasiharmonic Free Energy correction: 0.421813 hartree</p> <p>SCF Energy: -1412.165896 hartree<br/>           SCF Energy + ZPVE: -1411.680905 hartree<br/>           Enthalpy: -1411.643491 hartree<br/>           Free Energy: -1411.759068 hartree</p> <p>Free Energy with quasiharmonic correction: -1411.744083 hartree<br/>           (correction: 9.40 kcal/mol)</p> <p><b>B3LYP-D3/6-311+G(d,p)</b></p> <p>SCF Done: E(RB3LYP) = -1412.68256798 A.U.</p>                                                                                                                                                                                                                                                                                                                                                                                                                                                                                                                                                                                                                                                                                                                                                                                                                                                                                                                                                                                                                                                                                                                                                                                                                                                                             |          |          |   |         |          |         |   |         |         |         |   |         |         |         |   |         |         |         |   |         |         |         |   |         |          |         |   |         |         |         |   |         |          |         |   |         |          |         |   |         |          |         |   |         |         |         |   |         |         |         |   |         |         |         |   |         |         |          |   |         |         |         |   |         |         |         |   |         |         |         |   |         |         |          |   |         |         |         |   |         |          |          |   |          |          |          |   |          |          |          |   |         |          |         |   |         |          |         |   |         |          |         |   |         |          |         |   |          |          |          |
| Cartesian<br>Coordinates                       | <p>59<br/>           spD3-TS1-T2.out Energy: -886471.6880987</p> <table> <tr><td>O</td><td>1.97235</td><td>-3.39273</td><td>0.52607</td></tr> <tr><td>C</td><td>2.11399</td><td>3.64983</td><td>0.44616</td></tr> <tr><td>O</td><td>1.23651</td><td>2.79561</td><td>0.37632</td></tr> <tr><td>O</td><td>3.41071</td><td>3.41116</td><td>0.47435</td></tr> <tr><td>C</td><td>5.11683</td><td>0.11146</td><td>0.32751</td></tr> <tr><td>C</td><td>4.78624</td><td>-1.22570</td><td>0.32495</td></tr> <tr><td>N</td><td>3.94923</td><td>0.84560</td><td>0.39144</td></tr> <tr><td>C</td><td>2.96208</td><td>-0.04975</td><td>0.42368</td></tr> <tr><td>N</td><td>3.41507</td><td>-1.31485</td><td>0.38399</td></tr> <tr><td>H</td><td>5.41160</td><td>-2.10698</td><td>0.28578</td></tr> <tr><td>H</td><td>1.91611</td><td>0.21240</td><td>0.47632</td></tr> <tr><td>C</td><td>1.80314</td><td>5.13699</td><td>0.50621</td></tr> <tr><td>H</td><td>2.27749</td><td>5.58405</td><td>1.38633</td></tr> <tr><td>H</td><td>2.21974</td><td>5.63804</td><td>-0.37501</td></tr> <tr><td>H</td><td>0.72426</td><td>5.29615</td><td>0.54320</td></tr> <tr><td>C</td><td>6.46509</td><td>0.76063</td><td>0.27409</td></tr> <tr><td>H</td><td>7.25777</td><td>0.00506</td><td>0.23611</td></tr> <tr><td>H</td><td>6.57264</td><td>1.40404</td><td>-0.60945</td></tr> <tr><td>H</td><td>6.64640</td><td>1.39324</td><td>1.15323</td></tr> <tr><td>C</td><td>0.67172</td><td>-3.47808</td><td>-1.15571</td></tr> <tr><td>C</td><td>-0.64820</td><td>-1.37431</td><td>-1.21154</td></tr> <tr><td>O</td><td>-1.67845</td><td>-0.71041</td><td>-0.99369</td></tr> <tr><td>C</td><td>1.25255</td><td>-3.26762</td><td>1.70329</td></tr> <tr><td>H</td><td>1.71667</td><td>-2.54354</td><td>2.40210</td></tr> <tr><td>H</td><td>0.21625</td><td>-2.90421</td><td>1.52716</td></tr> <tr><td>H</td><td>1.16550</td><td>-4.22749</td><td>2.25097</td></tr> <tr><td>C</td><td>-0.49284</td><td>-2.77557</td><td>-0.94659</td></tr> </table> |          |          | O | 1.97235 | -3.39273 | 0.52607 | C | 2.11399 | 3.64983 | 0.44616 | O | 1.23651 | 2.79561 | 0.37632 | O | 3.41071 | 3.41116 | 0.47435 | C | 5.11683 | 0.11146 | 0.32751 | C | 4.78624 | -1.22570 | 0.32495 | N | 3.94923 | 0.84560 | 0.39144 | C | 2.96208 | -0.04975 | 0.42368 | N | 3.41507 | -1.31485 | 0.38399 | H | 5.41160 | -2.10698 | 0.28578 | H | 1.91611 | 0.21240 | 0.47632 | C | 1.80314 | 5.13699 | 0.50621 | H | 2.27749 | 5.58405 | 1.38633 | H | 2.21974 | 5.63804 | -0.37501 | H | 0.72426 | 5.29615 | 0.54320 | C | 6.46509 | 0.76063 | 0.27409 | H | 7.25777 | 0.00506 | 0.23611 | H | 6.57264 | 1.40404 | -0.60945 | H | 6.64640 | 1.39324 | 1.15323 | C | 0.67172 | -3.47808 | -1.15571 | C | -0.64820 | -1.37431 | -1.21154 | O | -1.67845 | -0.71041 | -0.99369 | C | 1.25255 | -3.26762 | 1.70329 | H | 1.71667 | -2.54354 | 2.40210 | H | 0.21625 | -2.90421 | 1.52716 | H | 1.16550 | -4.22749 | 2.25097 | C | -0.49284 | -2.77557 | -0.94659 |
| O                                              | 1.97235                                                                                                                                                                                                                                                                                                                                                                                                                                                                                                                                                                                                                                                                                                                                                                                                                                                                                                                                                                                                                                                                                                                                                                                                                                                                                                                                                                                                                                                                                                                                                                                                                                                                                                                                                                                                                                                                                                                                                                                                             | -3.39273 | 0.52607  |   |         |          |         |   |         |         |         |   |         |         |         |   |         |         |         |   |         |         |         |   |         |          |         |   |         |         |         |   |         |          |         |   |         |          |         |   |         |          |         |   |         |         |         |   |         |         |         |   |         |         |         |   |         |         |          |   |         |         |         |   |         |         |         |   |         |         |         |   |         |         |          |   |         |         |         |   |         |          |          |   |          |          |          |   |          |          |          |   |         |          |         |   |         |          |         |   |         |          |         |   |         |          |         |   |          |          |          |
| C                                              | 2.11399                                                                                                                                                                                                                                                                                                                                                                                                                                                                                                                                                                                                                                                                                                                                                                                                                                                                                                                                                                                                                                                                                                                                                                                                                                                                                                                                                                                                                                                                                                                                                                                                                                                                                                                                                                                                                                                                                                                                                                                                             | 3.64983  | 0.44616  |   |         |          |         |   |         |         |         |   |         |         |         |   |         |         |         |   |         |         |         |   |         |          |         |   |         |         |         |   |         |          |         |   |         |          |         |   |         |          |         |   |         |         |         |   |         |         |         |   |         |         |         |   |         |         |          |   |         |         |         |   |         |         |         |   |         |         |         |   |         |         |          |   |         |         |         |   |         |          |          |   |          |          |          |   |          |          |          |   |         |          |         |   |         |          |         |   |         |          |         |   |         |          |         |   |          |          |          |
| O                                              | 1.23651                                                                                                                                                                                                                                                                                                                                                                                                                                                                                                                                                                                                                                                                                                                                                                                                                                                                                                                                                                                                                                                                                                                                                                                                                                                                                                                                                                                                                                                                                                                                                                                                                                                                                                                                                                                                                                                                                                                                                                                                             | 2.79561  | 0.37632  |   |         |          |         |   |         |         |         |   |         |         |         |   |         |         |         |   |         |         |         |   |         |          |         |   |         |         |         |   |         |          |         |   |         |          |         |   |         |          |         |   |         |         |         |   |         |         |         |   |         |         |         |   |         |         |          |   |         |         |         |   |         |         |         |   |         |         |         |   |         |         |          |   |         |         |         |   |         |          |          |   |          |          |          |   |          |          |          |   |         |          |         |   |         |          |         |   |         |          |         |   |         |          |         |   |          |          |          |
| O                                              | 3.41071                                                                                                                                                                                                                                                                                                                                                                                                                                                                                                                                                                                                                                                                                                                                                                                                                                                                                                                                                                                                                                                                                                                                                                                                                                                                                                                                                                                                                                                                                                                                                                                                                                                                                                                                                                                                                                                                                                                                                                                                             | 3.41116  | 0.47435  |   |         |          |         |   |         |         |         |   |         |         |         |   |         |         |         |   |         |         |         |   |         |          |         |   |         |         |         |   |         |          |         |   |         |          |         |   |         |          |         |   |         |         |         |   |         |         |         |   |         |         |         |   |         |         |          |   |         |         |         |   |         |         |         |   |         |         |         |   |         |         |          |   |         |         |         |   |         |          |          |   |          |          |          |   |          |          |          |   |         |          |         |   |         |          |         |   |         |          |         |   |         |          |         |   |          |          |          |
| C                                              | 5.11683                                                                                                                                                                                                                                                                                                                                                                                                                                                                                                                                                                                                                                                                                                                                                                                                                                                                                                                                                                                                                                                                                                                                                                                                                                                                                                                                                                                                                                                                                                                                                                                                                                                                                                                                                                                                                                                                                                                                                                                                             | 0.11146  | 0.32751  |   |         |          |         |   |         |         |         |   |         |         |         |   |         |         |         |   |         |         |         |   |         |          |         |   |         |         |         |   |         |          |         |   |         |          |         |   |         |          |         |   |         |         |         |   |         |         |         |   |         |         |         |   |         |         |          |   |         |         |         |   |         |         |         |   |         |         |         |   |         |         |          |   |         |         |         |   |         |          |          |   |          |          |          |   |          |          |          |   |         |          |         |   |         |          |         |   |         |          |         |   |         |          |         |   |          |          |          |
| C                                              | 4.78624                                                                                                                                                                                                                                                                                                                                                                                                                                                                                                                                                                                                                                                                                                                                                                                                                                                                                                                                                                                                                                                                                                                                                                                                                                                                                                                                                                                                                                                                                                                                                                                                                                                                                                                                                                                                                                                                                                                                                                                                             | -1.22570 | 0.32495  |   |         |          |         |   |         |         |         |   |         |         |         |   |         |         |         |   |         |         |         |   |         |          |         |   |         |         |         |   |         |          |         |   |         |          |         |   |         |          |         |   |         |         |         |   |         |         |         |   |         |         |         |   |         |         |          |   |         |         |         |   |         |         |         |   |         |         |         |   |         |         |          |   |         |         |         |   |         |          |          |   |          |          |          |   |          |          |          |   |         |          |         |   |         |          |         |   |         |          |         |   |         |          |         |   |          |          |          |
| N                                              | 3.94923                                                                                                                                                                                                                                                                                                                                                                                                                                                                                                                                                                                                                                                                                                                                                                                                                                                                                                                                                                                                                                                                                                                                                                                                                                                                                                                                                                                                                                                                                                                                                                                                                                                                                                                                                                                                                                                                                                                                                                                                             | 0.84560  | 0.39144  |   |         |          |         |   |         |         |         |   |         |         |         |   |         |         |         |   |         |         |         |   |         |          |         |   |         |         |         |   |         |          |         |   |         |          |         |   |         |          |         |   |         |         |         |   |         |         |         |   |         |         |         |   |         |         |          |   |         |         |         |   |         |         |         |   |         |         |         |   |         |         |          |   |         |         |         |   |         |          |          |   |          |          |          |   |          |          |          |   |         |          |         |   |         |          |         |   |         |          |         |   |         |          |         |   |          |          |          |
| C                                              | 2.96208                                                                                                                                                                                                                                                                                                                                                                                                                                                                                                                                                                                                                                                                                                                                                                                                                                                                                                                                                                                                                                                                                                                                                                                                                                                                                                                                                                                                                                                                                                                                                                                                                                                                                                                                                                                                                                                                                                                                                                                                             | -0.04975 | 0.42368  |   |         |          |         |   |         |         |         |   |         |         |         |   |         |         |         |   |         |         |         |   |         |          |         |   |         |         |         |   |         |          |         |   |         |          |         |   |         |          |         |   |         |         |         |   |         |         |         |   |         |         |         |   |         |         |          |   |         |         |         |   |         |         |         |   |         |         |         |   |         |         |          |   |         |         |         |   |         |          |          |   |          |          |          |   |          |          |          |   |         |          |         |   |         |          |         |   |         |          |         |   |         |          |         |   |          |          |          |
| N                                              | 3.41507                                                                                                                                                                                                                                                                                                                                                                                                                                                                                                                                                                                                                                                                                                                                                                                                                                                                                                                                                                                                                                                                                                                                                                                                                                                                                                                                                                                                                                                                                                                                                                                                                                                                                                                                                                                                                                                                                                                                                                                                             | -1.31485 | 0.38399  |   |         |          |         |   |         |         |         |   |         |         |         |   |         |         |         |   |         |         |         |   |         |          |         |   |         |         |         |   |         |          |         |   |         |          |         |   |         |          |         |   |         |         |         |   |         |         |         |   |         |         |         |   |         |         |          |   |         |         |         |   |         |         |         |   |         |         |         |   |         |         |          |   |         |         |         |   |         |          |          |   |          |          |          |   |          |          |          |   |         |          |         |   |         |          |         |   |         |          |         |   |         |          |         |   |          |          |          |
| H                                              | 5.41160                                                                                                                                                                                                                                                                                                                                                                                                                                                                                                                                                                                                                                                                                                                                                                                                                                                                                                                                                                                                                                                                                                                                                                                                                                                                                                                                                                                                                                                                                                                                                                                                                                                                                                                                                                                                                                                                                                                                                                                                             | -2.10698 | 0.28578  |   |         |          |         |   |         |         |         |   |         |         |         |   |         |         |         |   |         |         |         |   |         |          |         |   |         |         |         |   |         |          |         |   |         |          |         |   |         |          |         |   |         |         |         |   |         |         |         |   |         |         |         |   |         |         |          |   |         |         |         |   |         |         |         |   |         |         |         |   |         |         |          |   |         |         |         |   |         |          |          |   |          |          |          |   |          |          |          |   |         |          |         |   |         |          |         |   |         |          |         |   |         |          |         |   |          |          |          |
| H                                              | 1.91611                                                                                                                                                                                                                                                                                                                                                                                                                                                                                                                                                                                                                                                                                                                                                                                                                                                                                                                                                                                                                                                                                                                                                                                                                                                                                                                                                                                                                                                                                                                                                                                                                                                                                                                                                                                                                                                                                                                                                                                                             | 0.21240  | 0.47632  |   |         |          |         |   |         |         |         |   |         |         |         |   |         |         |         |   |         |         |         |   |         |          |         |   |         |         |         |   |         |          |         |   |         |          |         |   |         |          |         |   |         |         |         |   |         |         |         |   |         |         |         |   |         |         |          |   |         |         |         |   |         |         |         |   |         |         |         |   |         |         |          |   |         |         |         |   |         |          |          |   |          |          |          |   |          |          |          |   |         |          |         |   |         |          |         |   |         |          |         |   |         |          |         |   |          |          |          |
| C                                              | 1.80314                                                                                                                                                                                                                                                                                                                                                                                                                                                                                                                                                                                                                                                                                                                                                                                                                                                                                                                                                                                                                                                                                                                                                                                                                                                                                                                                                                                                                                                                                                                                                                                                                                                                                                                                                                                                                                                                                                                                                                                                             | 5.13699  | 0.50621  |   |         |          |         |   |         |         |         |   |         |         |         |   |         |         |         |   |         |         |         |   |         |          |         |   |         |         |         |   |         |          |         |   |         |          |         |   |         |          |         |   |         |         |         |   |         |         |         |   |         |         |         |   |         |         |          |   |         |         |         |   |         |         |         |   |         |         |         |   |         |         |          |   |         |         |         |   |         |          |          |   |          |          |          |   |          |          |          |   |         |          |         |   |         |          |         |   |         |          |         |   |         |          |         |   |          |          |          |
| H                                              | 2.27749                                                                                                                                                                                                                                                                                                                                                                                                                                                                                                                                                                                                                                                                                                                                                                                                                                                                                                                                                                                                                                                                                                                                                                                                                                                                                                                                                                                                                                                                                                                                                                                                                                                                                                                                                                                                                                                                                                                                                                                                             | 5.58405  | 1.38633  |   |         |          |         |   |         |         |         |   |         |         |         |   |         |         |         |   |         |         |         |   |         |          |         |   |         |         |         |   |         |          |         |   |         |          |         |   |         |          |         |   |         |         |         |   |         |         |         |   |         |         |         |   |         |         |          |   |         |         |         |   |         |         |         |   |         |         |         |   |         |         |          |   |         |         |         |   |         |          |          |   |          |          |          |   |          |          |          |   |         |          |         |   |         |          |         |   |         |          |         |   |         |          |         |   |          |          |          |
| H                                              | 2.21974                                                                                                                                                                                                                                                                                                                                                                                                                                                                                                                                                                                                                                                                                                                                                                                                                                                                                                                                                                                                                                                                                                                                                                                                                                                                                                                                                                                                                                                                                                                                                                                                                                                                                                                                                                                                                                                                                                                                                                                                             | 5.63804  | -0.37501 |   |         |          |         |   |         |         |         |   |         |         |         |   |         |         |         |   |         |         |         |   |         |          |         |   |         |         |         |   |         |          |         |   |         |          |         |   |         |          |         |   |         |         |         |   |         |         |         |   |         |         |         |   |         |         |          |   |         |         |         |   |         |         |         |   |         |         |         |   |         |         |          |   |         |         |         |   |         |          |          |   |          |          |          |   |          |          |          |   |         |          |         |   |         |          |         |   |         |          |         |   |         |          |         |   |          |          |          |
| H                                              | 0.72426                                                                                                                                                                                                                                                                                                                                                                                                                                                                                                                                                                                                                                                                                                                                                                                                                                                                                                                                                                                                                                                                                                                                                                                                                                                                                                                                                                                                                                                                                                                                                                                                                                                                                                                                                                                                                                                                                                                                                                                                             | 5.29615  | 0.54320  |   |         |          |         |   |         |         |         |   |         |         |         |   |         |         |         |   |         |         |         |   |         |          |         |   |         |         |         |   |         |          |         |   |         |          |         |   |         |          |         |   |         |         |         |   |         |         |         |   |         |         |         |   |         |         |          |   |         |         |         |   |         |         |         |   |         |         |         |   |         |         |          |   |         |         |         |   |         |          |          |   |          |          |          |   |          |          |          |   |         |          |         |   |         |          |         |   |         |          |         |   |         |          |         |   |          |          |          |
| C                                              | 6.46509                                                                                                                                                                                                                                                                                                                                                                                                                                                                                                                                                                                                                                                                                                                                                                                                                                                                                                                                                                                                                                                                                                                                                                                                                                                                                                                                                                                                                                                                                                                                                                                                                                                                                                                                                                                                                                                                                                                                                                                                             | 0.76063  | 0.27409  |   |         |          |         |   |         |         |         |   |         |         |         |   |         |         |         |   |         |         |         |   |         |          |         |   |         |         |         |   |         |          |         |   |         |          |         |   |         |          |         |   |         |         |         |   |         |         |         |   |         |         |         |   |         |         |          |   |         |         |         |   |         |         |         |   |         |         |         |   |         |         |          |   |         |         |         |   |         |          |          |   |          |          |          |   |          |          |          |   |         |          |         |   |         |          |         |   |         |          |         |   |         |          |         |   |          |          |          |
| H                                              | 7.25777                                                                                                                                                                                                                                                                                                                                                                                                                                                                                                                                                                                                                                                                                                                                                                                                                                                                                                                                                                                                                                                                                                                                                                                                                                                                                                                                                                                                                                                                                                                                                                                                                                                                                                                                                                                                                                                                                                                                                                                                             | 0.00506  | 0.23611  |   |         |          |         |   |         |         |         |   |         |         |         |   |         |         |         |   |         |         |         |   |         |          |         |   |         |         |         |   |         |          |         |   |         |          |         |   |         |          |         |   |         |         |         |   |         |         |         |   |         |         |         |   |         |         |          |   |         |         |         |   |         |         |         |   |         |         |         |   |         |         |          |   |         |         |         |   |         |          |          |   |          |          |          |   |          |          |          |   |         |          |         |   |         |          |         |   |         |          |         |   |         |          |         |   |          |          |          |
| H                                              | 6.57264                                                                                                                                                                                                                                                                                                                                                                                                                                                                                                                                                                                                                                                                                                                                                                                                                                                                                                                                                                                                                                                                                                                                                                                                                                                                                                                                                                                                                                                                                                                                                                                                                                                                                                                                                                                                                                                                                                                                                                                                             | 1.40404  | -0.60945 |   |         |          |         |   |         |         |         |   |         |         |         |   |         |         |         |   |         |         |         |   |         |          |         |   |         |         |         |   |         |          |         |   |         |          |         |   |         |          |         |   |         |         |         |   |         |         |         |   |         |         |         |   |         |         |          |   |         |         |         |   |         |         |         |   |         |         |         |   |         |         |          |   |         |         |         |   |         |          |          |   |          |          |          |   |          |          |          |   |         |          |         |   |         |          |         |   |         |          |         |   |         |          |         |   |          |          |          |
| H                                              | 6.64640                                                                                                                                                                                                                                                                                                                                                                                                                                                                                                                                                                                                                                                                                                                                                                                                                                                                                                                                                                                                                                                                                                                                                                                                                                                                                                                                                                                                                                                                                                                                                                                                                                                                                                                                                                                                                                                                                                                                                                                                             | 1.39324  | 1.15323  |   |         |          |         |   |         |         |         |   |         |         |         |   |         |         |         |   |         |         |         |   |         |          |         |   |         |         |         |   |         |          |         |   |         |          |         |   |         |          |         |   |         |         |         |   |         |         |         |   |         |         |         |   |         |         |          |   |         |         |         |   |         |         |         |   |         |         |         |   |         |         |          |   |         |         |         |   |         |          |          |   |          |          |          |   |          |          |          |   |         |          |         |   |         |          |         |   |         |          |         |   |         |          |         |   |          |          |          |
| C                                              | 0.67172                                                                                                                                                                                                                                                                                                                                                                                                                                                                                                                                                                                                                                                                                                                                                                                                                                                                                                                                                                                                                                                                                                                                                                                                                                                                                                                                                                                                                                                                                                                                                                                                                                                                                                                                                                                                                                                                                                                                                                                                             | -3.47808 | -1.15571 |   |         |          |         |   |         |         |         |   |         |         |         |   |         |         |         |   |         |         |         |   |         |          |         |   |         |         |         |   |         |          |         |   |         |          |         |   |         |          |         |   |         |         |         |   |         |         |         |   |         |         |         |   |         |         |          |   |         |         |         |   |         |         |         |   |         |         |         |   |         |         |          |   |         |         |         |   |         |          |          |   |          |          |          |   |          |          |          |   |         |          |         |   |         |          |         |   |         |          |         |   |         |          |         |   |          |          |          |
| C                                              | -0.64820                                                                                                                                                                                                                                                                                                                                                                                                                                                                                                                                                                                                                                                                                                                                                                                                                                                                                                                                                                                                                                                                                                                                                                                                                                                                                                                                                                                                                                                                                                                                                                                                                                                                                                                                                                                                                                                                                                                                                                                                            | -1.37431 | -1.21154 |   |         |          |         |   |         |         |         |   |         |         |         |   |         |         |         |   |         |         |         |   |         |          |         |   |         |         |         |   |         |          |         |   |         |          |         |   |         |          |         |   |         |         |         |   |         |         |         |   |         |         |         |   |         |         |          |   |         |         |         |   |         |         |         |   |         |         |         |   |         |         |          |   |         |         |         |   |         |          |          |   |          |          |          |   |          |          |          |   |         |          |         |   |         |          |         |   |         |          |         |   |         |          |         |   |          |          |          |
| O                                              | -1.67845                                                                                                                                                                                                                                                                                                                                                                                                                                                                                                                                                                                                                                                                                                                                                                                                                                                                                                                                                                                                                                                                                                                                                                                                                                                                                                                                                                                                                                                                                                                                                                                                                                                                                                                                                                                                                                                                                                                                                                                                            | -0.71041 | -0.99369 |   |         |          |         |   |         |         |         |   |         |         |         |   |         |         |         |   |         |         |         |   |         |          |         |   |         |         |         |   |         |          |         |   |         |          |         |   |         |          |         |   |         |         |         |   |         |         |         |   |         |         |         |   |         |         |          |   |         |         |         |   |         |         |         |   |         |         |         |   |         |         |          |   |         |         |         |   |         |          |          |   |          |          |          |   |          |          |          |   |         |          |         |   |         |          |         |   |         |          |         |   |         |          |         |   |          |          |          |
| C                                              | 1.25255                                                                                                                                                                                                                                                                                                                                                                                                                                                                                                                                                                                                                                                                                                                                                                                                                                                                                                                                                                                                                                                                                                                                                                                                                                                                                                                                                                                                                                                                                                                                                                                                                                                                                                                                                                                                                                                                                                                                                                                                             | -3.26762 | 1.70329  |   |         |          |         |   |         |         |         |   |         |         |         |   |         |         |         |   |         |         |         |   |         |          |         |   |         |         |         |   |         |          |         |   |         |          |         |   |         |          |         |   |         |         |         |   |         |         |         |   |         |         |         |   |         |         |          |   |         |         |         |   |         |         |         |   |         |         |         |   |         |         |          |   |         |         |         |   |         |          |          |   |          |          |          |   |          |          |          |   |         |          |         |   |         |          |         |   |         |          |         |   |         |          |         |   |          |          |          |
| H                                              | 1.71667                                                                                                                                                                                                                                                                                                                                                                                                                                                                                                                                                                                                                                                                                                                                                                                                                                                                                                                                                                                                                                                                                                                                                                                                                                                                                                                                                                                                                                                                                                                                                                                                                                                                                                                                                                                                                                                                                                                                                                                                             | -2.54354 | 2.40210  |   |         |          |         |   |         |         |         |   |         |         |         |   |         |         |         |   |         |         |         |   |         |          |         |   |         |         |         |   |         |          |         |   |         |          |         |   |         |          |         |   |         |         |         |   |         |         |         |   |         |         |         |   |         |         |          |   |         |         |         |   |         |         |         |   |         |         |         |   |         |         |          |   |         |         |         |   |         |          |          |   |          |          |          |   |          |          |          |   |         |          |         |   |         |          |         |   |         |          |         |   |         |          |         |   |          |          |          |
| H                                              | 0.21625                                                                                                                                                                                                                                                                                                                                                                                                                                                                                                                                                                                                                                                                                                                                                                                                                                                                                                                                                                                                                                                                                                                                                                                                                                                                                                                                                                                                                                                                                                                                                                                                                                                                                                                                                                                                                                                                                                                                                                                                             | -2.90421 | 1.52716  |   |         |          |         |   |         |         |         |   |         |         |         |   |         |         |         |   |         |         |         |   |         |          |         |   |         |         |         |   |         |          |         |   |         |          |         |   |         |          |         |   |         |         |         |   |         |         |         |   |         |         |         |   |         |         |          |   |         |         |         |   |         |         |         |   |         |         |         |   |         |         |          |   |         |         |         |   |         |          |          |   |          |          |          |   |          |          |          |   |         |          |         |   |         |          |         |   |         |          |         |   |         |          |         |   |          |          |          |
| H                                              | 1.16550                                                                                                                                                                                                                                                                                                                                                                                                                                                                                                                                                                                                                                                                                                                                                                                                                                                                                                                                                                                                                                                                                                                                                                                                                                                                                                                                                                                                                                                                                                                                                                                                                                                                                                                                                                                                                                                                                                                                                                                                             | -4.22749 | 2.25097  |   |         |          |         |   |         |         |         |   |         |         |         |   |         |         |         |   |         |         |         |   |         |          |         |   |         |         |         |   |         |          |         |   |         |          |         |   |         |          |         |   |         |         |         |   |         |         |         |   |         |         |         |   |         |         |          |   |         |         |         |   |         |         |         |   |         |         |         |   |         |         |          |   |         |         |         |   |         |          |          |   |          |          |          |   |          |          |          |   |         |          |         |   |         |          |         |   |         |          |         |   |         |          |         |   |          |          |          |
| C                                              | -0.49284                                                                                                                                                                                                                                                                                                                                                                                                                                                                                                                                                                                                                                                                                                                                                                                                                                                                                                                                                                                                                                                                                                                                                                                                                                                                                                                                                                                                                                                                                                                                                                                                                                                                                                                                                                                                                                                                                                                                                                                                            | -2.77557 | -0.94659 |   |         |          |         |   |         |         |         |   |         |         |         |   |         |         |         |   |         |         |         |   |         |          |         |   |         |         |         |   |         |          |         |   |         |          |         |   |         |          |         |   |         |         |         |   |         |         |         |   |         |         |         |   |         |         |          |   |         |         |         |   |         |         |         |   |         |         |         |   |         |         |          |   |         |         |         |   |         |          |          |   |          |          |          |   |          |          |          |   |         |          |         |   |         |          |         |   |         |          |         |   |         |          |         |   |          |          |          |

|   |          |          |          |
|---|----------|----------|----------|
| H | -1.36845 | -3.26438 | -0.52919 |
| O | 0.43679  | -0.78909 | -1.78613 |
| C | 0.32158  | 0.59378  | -2.13908 |
| H | 1.16868  | 0.79348  | -2.79890 |
| H | 0.39469  | 1.23557  | -1.25720 |
| H | -0.62097 | 0.78489  | -2.65979 |
| H | 1.47125  | -2.98086 | -1.69243 |
| C | 0.68769  | -4.98140 | -1.18335 |
| H | 0.38720  | -5.34303 | -2.17920 |
| H | 1.68447  | -5.36281 | -0.95554 |
| H | -0.01798 | -5.39748 | -0.45531 |
| C | -4.33934 | 1.91782  | -0.47045 |
| O | -5.02590 | 2.92615  | -0.63822 |
| C | -5.01926 | 0.53652  | -0.44003 |
| N | -4.28140 | -0.55031 | 0.16992  |
| H | -5.95021 | 0.65538  | 0.11655  |
| H | -5.28142 | 0.28458  | -1.47734 |
| H | -3.40359 | -0.84832 | -0.25645 |
| C | -4.65618 | -1.09291 | 1.36350  |
| O | -5.67671 | -0.77447 | 1.97136  |
| C | -3.71905 | -2.17333 | 1.89089  |
| H | -4.19924 | -3.15282 | 1.78093  |
| H | -3.56207 | -2.00501 | 2.96009  |
| H | -2.75135 | -2.19386 | 1.38146  |
| N | -2.99158 | 1.94974  | -0.33534 |
| H | -2.45579 | 1.08716  | -0.36771 |
| C | -2.27021 | 3.20891  | -0.40866 |
| H | -2.25877 | 3.61297  | -1.43101 |
| H | -2.76229 | 3.94825  | 0.23017  |
| H | -1.24175 | 3.05807  | -0.07149 |
| H | 3.61813  | 2.37665  | 0.43406  |
| H | 2.76825  | -2.26374 | 0.41184  |

Optimized Molecular Properties for T2-INT1/T3-INT1/T4-INT1/T5-INT1

|                                                |                                                                                                                                                                                                                                                                                                                                                                                                                                                                                                                                                                                                                                                                                                                                         |                         |          |
|------------------------------------------------|-----------------------------------------------------------------------------------------------------------------------------------------------------------------------------------------------------------------------------------------------------------------------------------------------------------------------------------------------------------------------------------------------------------------------------------------------------------------------------------------------------------------------------------------------------------------------------------------------------------------------------------------------------------------------------------------------------------------------------------------|-------------------------|----------|
| Number of<br>(-)<br>Vibrational<br>Frequencies | 0                                                                                                                                                                                                                                                                                                                                                                                                                                                                                                                                                                                                                                                                                                                                       |                         |          |
| Absolute<br>Energies<br>(Hartrees)             | <p><b>B3LYP/6-31G(d)</b></p> <p>There are 17 positive frequencies below 100 cm<sup>-1</sup>.</p> <p>Zero-point correction: 0.491276 hartree<br/>           Enthalpy correction: 0.528338 hartree<br/>           Free Energy correction: 0.414852 hartree<br/>           Quasiharmonic Free Energy correction: 0.428118 hartree</p> <p>SCF Energy: -1412.176328 hartree<br/>           SCF Energy + ZPVE: -1411.685052 hartree<br/>           Enthalpy: -1411.647990 hartree<br/>           Free Energy: -1411.761476 hartree</p> <p>Free Energy with quasiharmonic correction: -1411.748210 hartree<br/>           (correction: 8.32 kcal/mol)</p> <p><b>B3LYP-D3/6-311+G(d,p)</b></p> <p>SCF Done: E(RB3LYP) = -1412.68906810 A.U.</p> |                         |          |
| Cartesian<br>Coordinates                       | 59<br>spD3-INT1-T2.out                                                                                                                                                                                                                                                                                                                                                                                                                                                                                                                                                                                                                                                                                                                  | Energy: -886475.7669855 |          |
|                                                | O 1.51394                                                                                                                                                                                                                                                                                                                                                                                                                                                                                                                                                                                                                                                                                                                               | -3.55415                | 0.05722  |
|                                                | C 2.42611                                                                                                                                                                                                                                                                                                                                                                                                                                                                                                                                                                                                                                                                                                                               | 3.73047                 | 0.27721  |
|                                                | O 1.53227                                                                                                                                                                                                                                                                                                                                                                                                                                                                                                                                                                                                                                                                                                                               | 2.93170                 | 0.03970  |
|                                                | O 3.68779                                                                                                                                                                                                                                                                                                                                                                                                                                                                                                                                                                                                                                                                                                                               | 3.40353                 | 0.53093  |
|                                                | C 5.00471                                                                                                                                                                                                                                                                                                                                                                                                                                                                                                                                                                                                                                                                                                                               | -0.17319                | 0.59880  |
|                                                | C 4.50771                                                                                                                                                                                                                                                                                                                                                                                                                                                                                                                                                                                                                                                                                                                               | -1.44374                | 0.43017  |
|                                                | N 3.96938                                                                                                                                                                                                                                                                                                                                                                                                                                                                                                                                                                                                                                                                                                                               | 0.73107                 | 0.45400  |
|                                                | C 2.88181                                                                                                                                                                                                                                                                                                                                                                                                                                                                                                                                                                                                                                                                                                                               | 0.01341                 | 0.20270  |
|                                                | N 3.16026                                                                                                                                                                                                                                                                                                                                                                                                                                                                                                                                                                                                                                                                                                                               | -1.30635                | 0.17726  |
|                                                | H 4.98574                                                                                                                                                                                                                                                                                                                                                                                                                                                                                                                                                                                                                                                                                                                               | -2.41165                | 0.46426  |
|                                                | H 1.89739                                                                                                                                                                                                                                                                                                                                                                                                                                                                                                                                                                                                                                                                                                                               | 0.42105                 | 0.03523  |
|                                                | C 2.20861                                                                                                                                                                                                                                                                                                                                                                                                                                                                                                                                                                                                                                                                                                                               | 5.23201                 | 0.31980  |
|                                                | H 2.44916                                                                                                                                                                                                                                                                                                                                                                                                                                                                                                                                                                                                                                                                                                                               | 5.61368                 | 1.31824  |
|                                                | H 2.88117                                                                                                                                                                                                                                                                                                                                                                                                                                                                                                                                                                                                                                                                                                                               | 5.72869                 | -0.38792 |
|                                                | H 1.17142                                                                                                                                                                                                                                                                                                                                                                                                                                                                                                                                                                                                                                                                                                                               | 5.46596                 | 0.07591  |
|                                                | C 6.40583                                                                                                                                                                                                                                                                                                                                                                                                                                                                                                                                                                                                                                                                                                                               | 0.26502                 | 0.89089  |
|                                                | H 7.07546                                                                                                                                                                                                                                                                                                                                                                                                                                                                                                                                                                                                                                                                                                                               | -0.59815                | 0.97077  |
|                                                | H 6.79446                                                                                                                                                                                                                                                                                                                                                                                                                                                                                                                                                                                                                                                                                                                               | 0.92202                 | 0.10222  |
|                                                | H 6.46373                                                                                                                                                                                                                                                                                                                                                                                                                                                                                                                                                                                                                                                                                                                               | 0.82554                 | 1.83276  |
|                                                | C 0.43620                                                                                                                                                                                                                                                                                                                                                                                                                                                                                                                                                                                                                                                                                                                               | -3.58632                | -1.01558 |
|                                                | C -0.79549                                                                                                                                                                                                                                                                                                                                                                                                                                                                                                                                                                                                                                                                                                                              | -1.38674                | -1.15736 |
|                                                | O -1.78198                                                                                                                                                                                                                                                                                                                                                                                                                                                                                                                                                                                                                                                                                                                              | -0.59671                | -1.07462 |
|                                                | C 1.04266                                                                                                                                                                                                                                                                                                                                                                                                                                                                                                                                                                                                                                                                                                                               | -3.74263                | 1.37634  |
|                                                | H 1.85113                                                                                                                                                                                                                                                                                                                                                                                                                                                                                                                                                                                                                                                                                                                               | -3.45585                | 2.05883  |
|                                                | H 0.16218                                                                                                                                                                                                                                                                                                                                                                                                                                                                                                                                                                                                                                                                                                                               | -3.11673                | 1.57567  |
|                                                | H 0.78168                                                                                                                                                                                                                                                                                                                                                                                                                                                                                                                                                                                                                                                                                                                               | -4.79483                | 1.57420  |
|                                                | C -0.72689                                                                                                                                                                                                                                                                                                                                                                                                                                                                                                                                                                                                                                                                                                                              | -2.71637                | -0.77393 |

|   |          |          |          |
|---|----------|----------|----------|
| H | -1.62877 | -3.14459 | -0.34637 |
| O | 0.38673  | -0.88996 | -1.72724 |
| C | 0.28342  | 0.37033  | -2.37725 |
| H | 1.20493  | 0.48140  | -2.95745 |
| H | 0.21544  | 1.19820  | -1.66302 |
| H | -0.58481 | 0.40977  | -3.04367 |
| H | 1.02256  | -3.22464 | -1.86461 |
| C | 0.06986  | -5.05648 | -1.23421 |
| H | -0.51424 | -5.15977 | -2.15559 |
| H | 0.96735  | -5.68172 | -1.31319 |
| H | -0.54599 | -5.44168 | -0.41201 |
| C | -4.17414 | 2.10299  | -0.38459 |
| O | -4.82959 | 3.14391  | -0.47218 |
| C | -4.90827 | 0.75836  | -0.22830 |
| N | -4.16035 | -0.33103 | 0.36401  |
| H | -5.78112 | 0.94498  | 0.39902  |
| H | -5.26870 | 0.47197  | -1.22716 |
| H | -3.31635 | -0.65948 | -0.12357 |
| C | -4.46740 | -0.82223 | 1.59370  |
| O | -5.43643 | -0.46101 | 2.26383  |
| C | -3.52030 | -1.90651 | 2.09814  |
| H | -4.04987 | -2.86647 | 2.11486  |
| H | -3.24385 | -1.67050 | 3.13054  |
| H | -2.61539 | -2.00948 | 1.49260  |
| N | -2.82185 | 2.06450  | -0.44960 |
| H | -2.33559 | 1.17092  | -0.55153 |
| C | -2.06294 | 3.28372  | -0.65956 |
| H | -2.09380 | 3.61338  | -1.70898 |
| H | -2.49363 | 4.08453  | -0.05202 |
| H | -1.02118 | 3.12214  | -0.37057 |
| H | 3.80390  | 2.38114  | 0.50317  |
| H | 2.48257  | -2.07818 | 0.02678  |

Optimized Molecular Properties for **T2-TS2**

|                                                |                                                                                                                                                                                                                                                                                                                                                                                                                                                                                                                                                                                                                                                                                                                                                                                                                                                                                                                                                                                                                                                                                                                                                                                                                                                                                                                                                                                                                                                                                                                                                                                                                                                                                                                                                                                                                                                                                                                                                                                                                            |          |          |          |         |   |         |         |          |   |         |         |          |   |         |         |          |   |         |          |         |   |         |          |         |   |         |          |         |   |         |          |         |   |         |          |         |   |         |          |         |   |         |         |          |   |         |          |         |   |         |          |          |   |         |         |          |   |         |         |          |   |         |         |          |   |         |         |          |   |         |          |         |   |         |          |         |   |         |          |         |   |         |          |         |   |          |          |          |   |          |          |          |   |          |         |          |   |          |          |         |   |          |          |         |   |          |          |         |
|------------------------------------------------|----------------------------------------------------------------------------------------------------------------------------------------------------------------------------------------------------------------------------------------------------------------------------------------------------------------------------------------------------------------------------------------------------------------------------------------------------------------------------------------------------------------------------------------------------------------------------------------------------------------------------------------------------------------------------------------------------------------------------------------------------------------------------------------------------------------------------------------------------------------------------------------------------------------------------------------------------------------------------------------------------------------------------------------------------------------------------------------------------------------------------------------------------------------------------------------------------------------------------------------------------------------------------------------------------------------------------------------------------------------------------------------------------------------------------------------------------------------------------------------------------------------------------------------------------------------------------------------------------------------------------------------------------------------------------------------------------------------------------------------------------------------------------------------------------------------------------------------------------------------------------------------------------------------------------------------------------------------------------------------------------------------------------|----------|----------|----------|---------|---|---------|---------|----------|---|---------|---------|----------|---|---------|---------|----------|---|---------|----------|---------|---|---------|----------|---------|---|---------|----------|---------|---|---------|----------|---------|---|---------|----------|---------|---|---------|----------|---------|---|---------|---------|----------|---|---------|----------|---------|---|---------|----------|----------|---|---------|---------|----------|---|---------|---------|----------|---|---------|---------|----------|---|---------|---------|----------|---|---------|----------|---------|---|---------|----------|---------|---|---------|----------|---------|---|---------|----------|---------|---|----------|----------|----------|---|----------|----------|----------|---|----------|---------|----------|---|----------|----------|---------|---|----------|----------|---------|---|----------|----------|---------|
| Number of<br>(-)<br>Vibrational<br>Frequencies | 1 (-193.8038)                                                                                                                                                                                                                                                                                                                                                                                                                                                                                                                                                                                                                                                                                                                                                                                                                                                                                                                                                                                                                                                                                                                                                                                                                                                                                                                                                                                                                                                                                                                                                                                                                                                                                                                                                                                                                                                                                                                                                                                                              |          |          |          |         |   |         |         |          |   |         |         |          |   |         |         |          |   |         |          |         |   |         |          |         |   |         |          |         |   |         |          |         |   |         |          |         |   |         |          |         |   |         |         |          |   |         |          |         |   |         |          |          |   |         |         |          |   |         |         |          |   |         |         |          |   |         |         |          |   |         |          |         |   |         |          |         |   |         |          |         |   |         |          |         |   |          |          |          |   |          |          |          |   |          |         |          |   |          |          |         |   |          |          |         |   |          |          |         |
| Absolute<br>Energies<br>(Hartrees)             | <p><b>B3LYP/6-31G(d)</b></p> <p>There are 22 positive frequencies below 100 cm<sup>-1</sup>.</p> <p>Zero-point correction: 0.604486 hartree<br/>         Enthalpy correction: 0.648185 hartree<br/>         Free Energy correction: 0.519520 hartree<br/>         Quasiharmonic Free Energy correction: 0.535992 hartree</p> <p>SCF Energy: -1757.737397 hartree<br/>         SCF Energy + ZPVE: -1757.132911 hartree<br/>         Enthalpy: -1757.089212 hartree<br/>         Free Energy: -1757.217877 hartree</p> <p>Free Energy with quasiharmonic correction: -1757.201405 hartree<br/>         (correction: 10.34 kcal/mol)</p> <p><b>B3LYP-D3/6-311+G(d,p)</b></p> <p>SCF Done: E(RB3LYP) = -1758.36912287 A.U.</p>                                                                                                                                                                                                                                                                                                                                                                                                                                                                                                                                                                                                                                                                                                                                                                                                                                                                                                                                                                                                                                                                                                                                                                                                                                                                                                 |          |          |          |         |   |         |         |          |   |         |         |          |   |         |         |          |   |         |          |         |   |         |          |         |   |         |          |         |   |         |          |         |   |         |          |         |   |         |          |         |   |         |         |          |   |         |          |         |   |         |          |          |   |         |         |          |   |         |         |          |   |         |         |          |   |         |         |          |   |         |          |         |   |         |          |         |   |         |          |         |   |         |          |         |   |          |          |          |   |          |          |          |   |          |         |          |   |          |          |         |   |          |          |         |   |          |          |         |
| Cartesian<br>Coordinates                       | <p>73</p> <p>spD3-TS2-T2.out Energy: -1103393.2745981</p> <table> <tr><td>O</td><td>0.08512</td><td>-4.02433</td><td>0.12913</td></tr> <tr><td>C</td><td>4.15661</td><td>1.98229</td><td>-1.18990</td></tr> <tr><td>O</td><td>3.07141</td><td>1.54291</td><td>-1.54332</td></tr> <tr><td>O</td><td>4.97797</td><td>1.37723</td><td>-0.34197</td></tr> <tr><td>C</td><td>4.51692</td><td>-2.08434</td><td>1.06410</td></tr> <tr><td>C</td><td>3.55690</td><td>-3.06107</td><td>1.17171</td></tr> <tr><td>N</td><td>3.93911</td><td>-0.95052</td><td>0.52559</td></tr> <tr><td>C</td><td>2.66316</td><td>-1.24243</td><td>0.31789</td></tr> <tr><td>N</td><td>2.38483</td><td>-2.51023</td><td>0.69973</td></tr> <tr><td>H</td><td>3.60381</td><td>-4.07757</td><td>1.53312</td></tr> <tr><td>H</td><td>4.56536</td><td>0.49763</td><td>-0.01155</td></tr> <tr><td>H</td><td>1.48444</td><td>-3.00616</td><td>0.59706</td></tr> <tr><td>H</td><td>1.93098</td><td>-0.56410</td><td>-0.09756</td></tr> <tr><td>C</td><td>4.70393</td><td>3.31736</td><td>-1.65916</td></tr> <tr><td>H</td><td>4.54968</td><td>4.06363</td><td>-0.87090</td></tr> <tr><td>H</td><td>5.77934</td><td>3.25252</td><td>-1.84825</td></tr> <tr><td>H</td><td>4.17669</td><td>3.64208</td><td>-2.55785</td></tr> <tr><td>C</td><td>5.96585</td><td>-2.13325</td><td>1.43585</td></tr> <tr><td>H</td><td>6.23538</td><td>-3.12056</td><td>1.82560</td></tr> <tr><td>H</td><td>6.60753</td><td>-1.92337</td><td>0.57090</td></tr> <tr><td>H</td><td>6.20771</td><td>-1.38836</td><td>2.20431</td></tr> <tr><td>C</td><td>-0.52672</td><td>-3.33739</td><td>-1.00242</td></tr> <tr><td>C</td><td>-0.73304</td><td>-0.81752</td><td>-1.11337</td></tr> <tr><td>O</td><td>-0.63658</td><td>0.29578</td><td>-0.56432</td></tr> <tr><td>C</td><td>-0.82129</td><td>-4.65946</td><td>1.03280</td></tr> <tr><td>H</td><td>-0.32096</td><td>-4.70691</td><td>2.00651</td></tr> <tr><td>H</td><td>-1.76982</td><td>-4.11466</td><td>1.11219</td></tr> </table> | O        | 0.08512  | -4.02433 | 0.12913 | C | 4.15661 | 1.98229 | -1.18990 | O | 3.07141 | 1.54291 | -1.54332 | O | 4.97797 | 1.37723 | -0.34197 | C | 4.51692 | -2.08434 | 1.06410 | C | 3.55690 | -3.06107 | 1.17171 | N | 3.93911 | -0.95052 | 0.52559 | C | 2.66316 | -1.24243 | 0.31789 | N | 2.38483 | -2.51023 | 0.69973 | H | 3.60381 | -4.07757 | 1.53312 | H | 4.56536 | 0.49763 | -0.01155 | H | 1.48444 | -3.00616 | 0.59706 | H | 1.93098 | -0.56410 | -0.09756 | C | 4.70393 | 3.31736 | -1.65916 | H | 4.54968 | 4.06363 | -0.87090 | H | 5.77934 | 3.25252 | -1.84825 | H | 4.17669 | 3.64208 | -2.55785 | C | 5.96585 | -2.13325 | 1.43585 | H | 6.23538 | -3.12056 | 1.82560 | H | 6.60753 | -1.92337 | 0.57090 | H | 6.20771 | -1.38836 | 2.20431 | C | -0.52672 | -3.33739 | -1.00242 | C | -0.73304 | -0.81752 | -1.11337 | O | -0.63658 | 0.29578 | -0.56432 | C | -0.82129 | -4.65946 | 1.03280 | H | -0.32096 | -4.70691 | 2.00651 | H | -1.76982 | -4.11466 | 1.11219 |
| O                                              | 0.08512                                                                                                                                                                                                                                                                                                                                                                                                                                                                                                                                                                                                                                                                                                                                                                                                                                                                                                                                                                                                                                                                                                                                                                                                                                                                                                                                                                                                                                                                                                                                                                                                                                                                                                                                                                                                                                                                                                                                                                                                                    | -4.02433 | 0.12913  |          |         |   |         |         |          |   |         |         |          |   |         |         |          |   |         |          |         |   |         |          |         |   |         |          |         |   |         |          |         |   |         |          |         |   |         |          |         |   |         |         |          |   |         |          |         |   |         |          |          |   |         |         |          |   |         |         |          |   |         |         |          |   |         |         |          |   |         |          |         |   |         |          |         |   |         |          |         |   |         |          |         |   |          |          |          |   |          |          |          |   |          |         |          |   |          |          |         |   |          |          |         |   |          |          |         |
| C                                              | 4.15661                                                                                                                                                                                                                                                                                                                                                                                                                                                                                                                                                                                                                                                                                                                                                                                                                                                                                                                                                                                                                                                                                                                                                                                                                                                                                                                                                                                                                                                                                                                                                                                                                                                                                                                                                                                                                                                                                                                                                                                                                    | 1.98229  | -1.18990 |          |         |   |         |         |          |   |         |         |          |   |         |         |          |   |         |          |         |   |         |          |         |   |         |          |         |   |         |          |         |   |         |          |         |   |         |          |         |   |         |         |          |   |         |          |         |   |         |          |          |   |         |         |          |   |         |         |          |   |         |         |          |   |         |         |          |   |         |          |         |   |         |          |         |   |         |          |         |   |         |          |         |   |          |          |          |   |          |          |          |   |          |         |          |   |          |          |         |   |          |          |         |   |          |          |         |
| O                                              | 3.07141                                                                                                                                                                                                                                                                                                                                                                                                                                                                                                                                                                                                                                                                                                                                                                                                                                                                                                                                                                                                                                                                                                                                                                                                                                                                                                                                                                                                                                                                                                                                                                                                                                                                                                                                                                                                                                                                                                                                                                                                                    | 1.54291  | -1.54332 |          |         |   |         |         |          |   |         |         |          |   |         |         |          |   |         |          |         |   |         |          |         |   |         |          |         |   |         |          |         |   |         |          |         |   |         |          |         |   |         |         |          |   |         |          |         |   |         |          |          |   |         |         |          |   |         |         |          |   |         |         |          |   |         |         |          |   |         |          |         |   |         |          |         |   |         |          |         |   |         |          |         |   |          |          |          |   |          |          |          |   |          |         |          |   |          |          |         |   |          |          |         |   |          |          |         |
| O                                              | 4.97797                                                                                                                                                                                                                                                                                                                                                                                                                                                                                                                                                                                                                                                                                                                                                                                                                                                                                                                                                                                                                                                                                                                                                                                                                                                                                                                                                                                                                                                                                                                                                                                                                                                                                                                                                                                                                                                                                                                                                                                                                    | 1.37723  | -0.34197 |          |         |   |         |         |          |   |         |         |          |   |         |         |          |   |         |          |         |   |         |          |         |   |         |          |         |   |         |          |         |   |         |          |         |   |         |          |         |   |         |         |          |   |         |          |         |   |         |          |          |   |         |         |          |   |         |         |          |   |         |         |          |   |         |         |          |   |         |          |         |   |         |          |         |   |         |          |         |   |         |          |         |   |          |          |          |   |          |          |          |   |          |         |          |   |          |          |         |   |          |          |         |   |          |          |         |
| C                                              | 4.51692                                                                                                                                                                                                                                                                                                                                                                                                                                                                                                                                                                                                                                                                                                                                                                                                                                                                                                                                                                                                                                                                                                                                                                                                                                                                                                                                                                                                                                                                                                                                                                                                                                                                                                                                                                                                                                                                                                                                                                                                                    | -2.08434 | 1.06410  |          |         |   |         |         |          |   |         |         |          |   |         |         |          |   |         |          |         |   |         |          |         |   |         |          |         |   |         |          |         |   |         |          |         |   |         |          |         |   |         |         |          |   |         |          |         |   |         |          |          |   |         |         |          |   |         |         |          |   |         |         |          |   |         |         |          |   |         |          |         |   |         |          |         |   |         |          |         |   |         |          |         |   |          |          |          |   |          |          |          |   |          |         |          |   |          |          |         |   |          |          |         |   |          |          |         |
| C                                              | 3.55690                                                                                                                                                                                                                                                                                                                                                                                                                                                                                                                                                                                                                                                                                                                                                                                                                                                                                                                                                                                                                                                                                                                                                                                                                                                                                                                                                                                                                                                                                                                                                                                                                                                                                                                                                                                                                                                                                                                                                                                                                    | -3.06107 | 1.17171  |          |         |   |         |         |          |   |         |         |          |   |         |         |          |   |         |          |         |   |         |          |         |   |         |          |         |   |         |          |         |   |         |          |         |   |         |          |         |   |         |         |          |   |         |          |         |   |         |          |          |   |         |         |          |   |         |         |          |   |         |         |          |   |         |         |          |   |         |          |         |   |         |          |         |   |         |          |         |   |         |          |         |   |          |          |          |   |          |          |          |   |          |         |          |   |          |          |         |   |          |          |         |   |          |          |         |
| N                                              | 3.93911                                                                                                                                                                                                                                                                                                                                                                                                                                                                                                                                                                                                                                                                                                                                                                                                                                                                                                                                                                                                                                                                                                                                                                                                                                                                                                                                                                                                                                                                                                                                                                                                                                                                                                                                                                                                                                                                                                                                                                                                                    | -0.95052 | 0.52559  |          |         |   |         |         |          |   |         |         |          |   |         |         |          |   |         |          |         |   |         |          |         |   |         |          |         |   |         |          |         |   |         |          |         |   |         |          |         |   |         |         |          |   |         |          |         |   |         |          |          |   |         |         |          |   |         |         |          |   |         |         |          |   |         |         |          |   |         |          |         |   |         |          |         |   |         |          |         |   |         |          |         |   |          |          |          |   |          |          |          |   |          |         |          |   |          |          |         |   |          |          |         |   |          |          |         |
| C                                              | 2.66316                                                                                                                                                                                                                                                                                                                                                                                                                                                                                                                                                                                                                                                                                                                                                                                                                                                                                                                                                                                                                                                                                                                                                                                                                                                                                                                                                                                                                                                                                                                                                                                                                                                                                                                                                                                                                                                                                                                                                                                                                    | -1.24243 | 0.31789  |          |         |   |         |         |          |   |         |         |          |   |         |         |          |   |         |          |         |   |         |          |         |   |         |          |         |   |         |          |         |   |         |          |         |   |         |          |         |   |         |         |          |   |         |          |         |   |         |          |          |   |         |         |          |   |         |         |          |   |         |         |          |   |         |         |          |   |         |          |         |   |         |          |         |   |         |          |         |   |         |          |         |   |          |          |          |   |          |          |          |   |          |         |          |   |          |          |         |   |          |          |         |   |          |          |         |
| N                                              | 2.38483                                                                                                                                                                                                                                                                                                                                                                                                                                                                                                                                                                                                                                                                                                                                                                                                                                                                                                                                                                                                                                                                                                                                                                                                                                                                                                                                                                                                                                                                                                                                                                                                                                                                                                                                                                                                                                                                                                                                                                                                                    | -2.51023 | 0.69973  |          |         |   |         |         |          |   |         |         |          |   |         |         |          |   |         |          |         |   |         |          |         |   |         |          |         |   |         |          |         |   |         |          |         |   |         |          |         |   |         |         |          |   |         |          |         |   |         |          |          |   |         |         |          |   |         |         |          |   |         |         |          |   |         |         |          |   |         |          |         |   |         |          |         |   |         |          |         |   |         |          |         |   |          |          |          |   |          |          |          |   |          |         |          |   |          |          |         |   |          |          |         |   |          |          |         |
| H                                              | 3.60381                                                                                                                                                                                                                                                                                                                                                                                                                                                                                                                                                                                                                                                                                                                                                                                                                                                                                                                                                                                                                                                                                                                                                                                                                                                                                                                                                                                                                                                                                                                                                                                                                                                                                                                                                                                                                                                                                                                                                                                                                    | -4.07757 | 1.53312  |          |         |   |         |         |          |   |         |         |          |   |         |         |          |   |         |          |         |   |         |          |         |   |         |          |         |   |         |          |         |   |         |          |         |   |         |          |         |   |         |         |          |   |         |          |         |   |         |          |          |   |         |         |          |   |         |         |          |   |         |         |          |   |         |         |          |   |         |          |         |   |         |          |         |   |         |          |         |   |         |          |         |   |          |          |          |   |          |          |          |   |          |         |          |   |          |          |         |   |          |          |         |   |          |          |         |
| H                                              | 4.56536                                                                                                                                                                                                                                                                                                                                                                                                                                                                                                                                                                                                                                                                                                                                                                                                                                                                                                                                                                                                                                                                                                                                                                                                                                                                                                                                                                                                                                                                                                                                                                                                                                                                                                                                                                                                                                                                                                                                                                                                                    | 0.49763  | -0.01155 |          |         |   |         |         |          |   |         |         |          |   |         |         |          |   |         |          |         |   |         |          |         |   |         |          |         |   |         |          |         |   |         |          |         |   |         |          |         |   |         |         |          |   |         |          |         |   |         |          |          |   |         |         |          |   |         |         |          |   |         |         |          |   |         |         |          |   |         |          |         |   |         |          |         |   |         |          |         |   |         |          |         |   |          |          |          |   |          |          |          |   |          |         |          |   |          |          |         |   |          |          |         |   |          |          |         |
| H                                              | 1.48444                                                                                                                                                                                                                                                                                                                                                                                                                                                                                                                                                                                                                                                                                                                                                                                                                                                                                                                                                                                                                                                                                                                                                                                                                                                                                                                                                                                                                                                                                                                                                                                                                                                                                                                                                                                                                                                                                                                                                                                                                    | -3.00616 | 0.59706  |          |         |   |         |         |          |   |         |         |          |   |         |         |          |   |         |          |         |   |         |          |         |   |         |          |         |   |         |          |         |   |         |          |         |   |         |          |         |   |         |         |          |   |         |          |         |   |         |          |          |   |         |         |          |   |         |         |          |   |         |         |          |   |         |         |          |   |         |          |         |   |         |          |         |   |         |          |         |   |         |          |         |   |          |          |          |   |          |          |          |   |          |         |          |   |          |          |         |   |          |          |         |   |          |          |         |
| H                                              | 1.93098                                                                                                                                                                                                                                                                                                                                                                                                                                                                                                                                                                                                                                                                                                                                                                                                                                                                                                                                                                                                                                                                                                                                                                                                                                                                                                                                                                                                                                                                                                                                                                                                                                                                                                                                                                                                                                                                                                                                                                                                                    | -0.56410 | -0.09756 |          |         |   |         |         |          |   |         |         |          |   |         |         |          |   |         |          |         |   |         |          |         |   |         |          |         |   |         |          |         |   |         |          |         |   |         |          |         |   |         |         |          |   |         |          |         |   |         |          |          |   |         |         |          |   |         |         |          |   |         |         |          |   |         |         |          |   |         |          |         |   |         |          |         |   |         |          |         |   |         |          |         |   |          |          |          |   |          |          |          |   |          |         |          |   |          |          |         |   |          |          |         |   |          |          |         |
| C                                              | 4.70393                                                                                                                                                                                                                                                                                                                                                                                                                                                                                                                                                                                                                                                                                                                                                                                                                                                                                                                                                                                                                                                                                                                                                                                                                                                                                                                                                                                                                                                                                                                                                                                                                                                                                                                                                                                                                                                                                                                                                                                                                    | 3.31736  | -1.65916 |          |         |   |         |         |          |   |         |         |          |   |         |         |          |   |         |          |         |   |         |          |         |   |         |          |         |   |         |          |         |   |         |          |         |   |         |          |         |   |         |         |          |   |         |          |         |   |         |          |          |   |         |         |          |   |         |         |          |   |         |         |          |   |         |         |          |   |         |          |         |   |         |          |         |   |         |          |         |   |         |          |         |   |          |          |          |   |          |          |          |   |          |         |          |   |          |          |         |   |          |          |         |   |          |          |         |
| H                                              | 4.54968                                                                                                                                                                                                                                                                                                                                                                                                                                                                                                                                                                                                                                                                                                                                                                                                                                                                                                                                                                                                                                                                                                                                                                                                                                                                                                                                                                                                                                                                                                                                                                                                                                                                                                                                                                                                                                                                                                                                                                                                                    | 4.06363  | -0.87090 |          |         |   |         |         |          |   |         |         |          |   |         |         |          |   |         |          |         |   |         |          |         |   |         |          |         |   |         |          |         |   |         |          |         |   |         |          |         |   |         |         |          |   |         |          |         |   |         |          |          |   |         |         |          |   |         |         |          |   |         |         |          |   |         |         |          |   |         |          |         |   |         |          |         |   |         |          |         |   |         |          |         |   |          |          |          |   |          |          |          |   |          |         |          |   |          |          |         |   |          |          |         |   |          |          |         |
| H                                              | 5.77934                                                                                                                                                                                                                                                                                                                                                                                                                                                                                                                                                                                                                                                                                                                                                                                                                                                                                                                                                                                                                                                                                                                                                                                                                                                                                                                                                                                                                                                                                                                                                                                                                                                                                                                                                                                                                                                                                                                                                                                                                    | 3.25252  | -1.84825 |          |         |   |         |         |          |   |         |         |          |   |         |         |          |   |         |          |         |   |         |          |         |   |         |          |         |   |         |          |         |   |         |          |         |   |         |          |         |   |         |         |          |   |         |          |         |   |         |          |          |   |         |         |          |   |         |         |          |   |         |         |          |   |         |         |          |   |         |          |         |   |         |          |         |   |         |          |         |   |         |          |         |   |          |          |          |   |          |          |          |   |          |         |          |   |          |          |         |   |          |          |         |   |          |          |         |
| H                                              | 4.17669                                                                                                                                                                                                                                                                                                                                                                                                                                                                                                                                                                                                                                                                                                                                                                                                                                                                                                                                                                                                                                                                                                                                                                                                                                                                                                                                                                                                                                                                                                                                                                                                                                                                                                                                                                                                                                                                                                                                                                                                                    | 3.64208  | -2.55785 |          |         |   |         |         |          |   |         |         |          |   |         |         |          |   |         |          |         |   |         |          |         |   |         |          |         |   |         |          |         |   |         |          |         |   |         |          |         |   |         |         |          |   |         |          |         |   |         |          |          |   |         |         |          |   |         |         |          |   |         |         |          |   |         |         |          |   |         |          |         |   |         |          |         |   |         |          |         |   |         |          |         |   |          |          |          |   |          |          |          |   |          |         |          |   |          |          |         |   |          |          |         |   |          |          |         |
| C                                              | 5.96585                                                                                                                                                                                                                                                                                                                                                                                                                                                                                                                                                                                                                                                                                                                                                                                                                                                                                                                                                                                                                                                                                                                                                                                                                                                                                                                                                                                                                                                                                                                                                                                                                                                                                                                                                                                                                                                                                                                                                                                                                    | -2.13325 | 1.43585  |          |         |   |         |         |          |   |         |         |          |   |         |         |          |   |         |          |         |   |         |          |         |   |         |          |         |   |         |          |         |   |         |          |         |   |         |          |         |   |         |         |          |   |         |          |         |   |         |          |          |   |         |         |          |   |         |         |          |   |         |         |          |   |         |         |          |   |         |          |         |   |         |          |         |   |         |          |         |   |         |          |         |   |          |          |          |   |          |          |          |   |          |         |          |   |          |          |         |   |          |          |         |   |          |          |         |
| H                                              | 6.23538                                                                                                                                                                                                                                                                                                                                                                                                                                                                                                                                                                                                                                                                                                                                                                                                                                                                                                                                                                                                                                                                                                                                                                                                                                                                                                                                                                                                                                                                                                                                                                                                                                                                                                                                                                                                                                                                                                                                                                                                                    | -3.12056 | 1.82560  |          |         |   |         |         |          |   |         |         |          |   |         |         |          |   |         |          |         |   |         |          |         |   |         |          |         |   |         |          |         |   |         |          |         |   |         |          |         |   |         |         |          |   |         |          |         |   |         |          |          |   |         |         |          |   |         |         |          |   |         |         |          |   |         |         |          |   |         |          |         |   |         |          |         |   |         |          |         |   |         |          |         |   |          |          |          |   |          |          |          |   |          |         |          |   |          |          |         |   |          |          |         |   |          |          |         |
| H                                              | 6.60753                                                                                                                                                                                                                                                                                                                                                                                                                                                                                                                                                                                                                                                                                                                                                                                                                                                                                                                                                                                                                                                                                                                                                                                                                                                                                                                                                                                                                                                                                                                                                                                                                                                                                                                                                                                                                                                                                                                                                                                                                    | -1.92337 | 0.57090  |          |         |   |         |         |          |   |         |         |          |   |         |         |          |   |         |          |         |   |         |          |         |   |         |          |         |   |         |          |         |   |         |          |         |   |         |          |         |   |         |         |          |   |         |          |         |   |         |          |          |   |         |         |          |   |         |         |          |   |         |         |          |   |         |         |          |   |         |          |         |   |         |          |         |   |         |          |         |   |         |          |         |   |          |          |          |   |          |          |          |   |          |         |          |   |          |          |         |   |          |          |         |   |          |          |         |
| H                                              | 6.20771                                                                                                                                                                                                                                                                                                                                                                                                                                                                                                                                                                                                                                                                                                                                                                                                                                                                                                                                                                                                                                                                                                                                                                                                                                                                                                                                                                                                                                                                                                                                                                                                                                                                                                                                                                                                                                                                                                                                                                                                                    | -1.38836 | 2.20431  |          |         |   |         |         |          |   |         |         |          |   |         |         |          |   |         |          |         |   |         |          |         |   |         |          |         |   |         |          |         |   |         |          |         |   |         |          |         |   |         |         |          |   |         |          |         |   |         |          |          |   |         |         |          |   |         |         |          |   |         |         |          |   |         |         |          |   |         |          |         |   |         |          |         |   |         |          |         |   |         |          |         |   |          |          |          |   |          |          |          |   |          |         |          |   |          |          |         |   |          |          |         |   |          |          |         |
| C                                              | -0.52672                                                                                                                                                                                                                                                                                                                                                                                                                                                                                                                                                                                                                                                                                                                                                                                                                                                                                                                                                                                                                                                                                                                                                                                                                                                                                                                                                                                                                                                                                                                                                                                                                                                                                                                                                                                                                                                                                                                                                                                                                   | -3.33739 | -1.00242 |          |         |   |         |         |          |   |         |         |          |   |         |         |          |   |         |          |         |   |         |          |         |   |         |          |         |   |         |          |         |   |         |          |         |   |         |          |         |   |         |         |          |   |         |          |         |   |         |          |          |   |         |         |          |   |         |         |          |   |         |         |          |   |         |         |          |   |         |          |         |   |         |          |         |   |         |          |         |   |         |          |         |   |          |          |          |   |          |          |          |   |          |         |          |   |          |          |         |   |          |          |         |   |          |          |         |
| C                                              | -0.73304                                                                                                                                                                                                                                                                                                                                                                                                                                                                                                                                                                                                                                                                                                                                                                                                                                                                                                                                                                                                                                                                                                                                                                                                                                                                                                                                                                                                                                                                                                                                                                                                                                                                                                                                                                                                                                                                                                                                                                                                                   | -0.81752 | -1.11337 |          |         |   |         |         |          |   |         |         |          |   |         |         |          |   |         |          |         |   |         |          |         |   |         |          |         |   |         |          |         |   |         |          |         |   |         |          |         |   |         |         |          |   |         |          |         |   |         |          |          |   |         |         |          |   |         |         |          |   |         |         |          |   |         |         |          |   |         |          |         |   |         |          |         |   |         |          |         |   |         |          |         |   |          |          |          |   |          |          |          |   |          |         |          |   |          |          |         |   |          |          |         |   |          |          |         |
| O                                              | -0.63658                                                                                                                                                                                                                                                                                                                                                                                                                                                                                                                                                                                                                                                                                                                                                                                                                                                                                                                                                                                                                                                                                                                                                                                                                                                                                                                                                                                                                                                                                                                                                                                                                                                                                                                                                                                                                                                                                                                                                                                                                   | 0.29578  | -0.56432 |          |         |   |         |         |          |   |         |         |          |   |         |         |          |   |         |          |         |   |         |          |         |   |         |          |         |   |         |          |         |   |         |          |         |   |         |          |         |   |         |         |          |   |         |          |         |   |         |          |          |   |         |         |          |   |         |         |          |   |         |         |          |   |         |         |          |   |         |          |         |   |         |          |         |   |         |          |         |   |         |          |         |   |          |          |          |   |          |          |          |   |          |         |          |   |          |          |         |   |          |          |         |   |          |          |         |
| C                                              | -0.82129                                                                                                                                                                                                                                                                                                                                                                                                                                                                                                                                                                                                                                                                                                                                                                                                                                                                                                                                                                                                                                                                                                                                                                                                                                                                                                                                                                                                                                                                                                                                                                                                                                                                                                                                                                                                                                                                                                                                                                                                                   | -4.65946 | 1.03280  |          |         |   |         |         |          |   |         |         |          |   |         |         |          |   |         |          |         |   |         |          |         |   |         |          |         |   |         |          |         |   |         |          |         |   |         |          |         |   |         |         |          |   |         |          |         |   |         |          |          |   |         |         |          |   |         |         |          |   |         |         |          |   |         |         |          |   |         |          |         |   |         |          |         |   |         |          |         |   |         |          |         |   |          |          |          |   |          |          |          |   |          |         |          |   |          |          |         |   |          |          |         |   |          |          |         |
| H                                              | -0.32096                                                                                                                                                                                                                                                                                                                                                                                                                                                                                                                                                                                                                                                                                                                                                                                                                                                                                                                                                                                                                                                                                                                                                                                                                                                                                                                                                                                                                                                                                                                                                                                                                                                                                                                                                                                                                                                                                                                                                                                                                   | -4.70691 | 2.00651  |          |         |   |         |         |          |   |         |         |          |   |         |         |          |   |         |          |         |   |         |          |         |   |         |          |         |   |         |          |         |   |         |          |         |   |         |          |         |   |         |         |          |   |         |          |         |   |         |          |          |   |         |         |          |   |         |         |          |   |         |         |          |   |         |         |          |   |         |          |         |   |         |          |         |   |         |          |         |   |         |          |         |   |          |          |          |   |          |          |          |   |          |         |          |   |          |          |         |   |          |          |         |   |          |          |         |
| H                                              | -1.76982                                                                                                                                                                                                                                                                                                                                                                                                                                                                                                                                                                                                                                                                                                                                                                                                                                                                                                                                                                                                                                                                                                                                                                                                                                                                                                                                                                                                                                                                                                                                                                                                                                                                                                                                                                                                                                                                                                                                                                                                                   | -4.11466 | 1.11219  |          |         |   |         |         |          |   |         |         |          |   |         |         |          |   |         |          |         |   |         |          |         |   |         |          |         |   |         |          |         |   |         |          |         |   |         |          |         |   |         |         |          |   |         |          |         |   |         |          |          |   |         |         |          |   |         |         |          |   |         |         |          |   |         |         |          |   |         |          |         |   |         |          |         |   |         |          |         |   |         |          |         |   |          |          |          |   |          |          |          |   |          |         |          |   |          |          |         |   |          |          |         |   |          |          |         |

|   |          |          |          |
|---|----------|----------|----------|
| H | -1.03950 | -5.68433 | 0.70051  |
| C | -1.20001 | -2.03954 | -0.51941 |
| C | -3.21142 | -2.26492 | -0.65681 |
| C | -3.75497 | -0.90121 | -0.28227 |
| H | -3.19156 | -2.38435 | -1.76241 |
| O | -3.50679 | -3.26082 | 0.07083  |
| C | -4.29153 | -0.70485 | 0.99607  |
| C | -3.81543 | 0.14928  | -1.20609 |
| C | -4.86357 | 0.51680  | 1.34810  |
| H | -4.26407 | -1.54415 | 1.68488  |
| C | -4.39523 | 1.37120  | -0.86289 |
| H | -3.40898 | 0.00008  | -2.20520 |
| C | -4.92199 | 1.55995  | 0.41818  |
| H | -5.27501 | 0.65708  | 2.34577  |
| H | -4.43734 | 2.17722  | -1.59237 |
| H | -5.37898 | 2.50985  | 0.68681  |
| H | -1.20983 | -1.95506 | 0.56466  |
| O | -0.44946 | -0.94410 | -2.45197 |
| C | 0.03790  | 0.23045  | -3.10688 |
| H | 0.17445  | -0.05564 | -4.15275 |
| H | 0.99041  | 0.55925  | -2.68019 |
| H | -0.68611 | 1.04785  | -3.03450 |
| H | 0.34697  | -3.07077 | -1.60732 |
| C | -1.35967 | -4.31160 | -1.84181 |
| H | -1.61289 | -3.83059 | -2.79315 |
| H | -0.76557 | -5.20757 | -2.06108 |
| H | -2.28789 | -4.58609 | -1.33569 |
| C | -0.94965 | 4.06873  | 0.13311  |
| O | -1.19239 | 5.26127  | -0.05781 |
| C | -1.58746 | 3.34579  | 1.33012  |
| N | -1.02583 | 2.06264  | 1.69651  |
| H | -1.48725 | 4.00743  | 2.19243  |
| H | -2.65632 | 3.23731  | 1.10766  |
| H | -1.11844 | 1.28072  | 1.05011  |
| C | -0.31320 | 1.88956  | 2.84515  |
| O | -0.13259 | 2.77519  | 3.67975  |
| C | 0.25510  | 0.48911  | 3.03820  |
| H | -0.12638 | 0.07726  | 3.97845  |
| H | 1.34370  | 0.56289  | 3.13077  |
| H | 0.01493  | -0.19292 | 2.21843  |
| N | -0.15174 | 3.32995  | -0.67603 |
| H | -0.09527 | 2.32356  | -0.55463 |
| C | 0.46784  | 3.90752  | -1.85256 |
| H | -0.20960 | 3.91029  | -2.71980 |
| H | 0.73515  | 4.94533  | -1.63805 |
| H | 1.36311  | 3.33048  | -2.09627 |

Optimized Molecular Properties for **T2-INT2**

|                                                |                                                                                                                                                                                                                                                                                                                                                                                                                                                                                                                                                                                                                                                                                                                            |                          |          |
|------------------------------------------------|----------------------------------------------------------------------------------------------------------------------------------------------------------------------------------------------------------------------------------------------------------------------------------------------------------------------------------------------------------------------------------------------------------------------------------------------------------------------------------------------------------------------------------------------------------------------------------------------------------------------------------------------------------------------------------------------------------------------------|--------------------------|----------|
| Number of<br>(-)<br>Vibrational<br>Frequencies | 0                                                                                                                                                                                                                                                                                                                                                                                                                                                                                                                                                                                                                                                                                                                          |                          |          |
| Absolute<br>Energies<br>(Hartrees)             | <p><b>B3LYP/6-31G(d)</b></p> <p>There are 22 positive frequencies below 100 cm<sup>-1</sup>.</p> <p>Zero-point correction: 0.605349 hartree<br/>         Enthalpy correction: 0.649323 hartree<br/>         Free Energy correction: 0.519142 hartree<br/>         Quasiharmonic Free Energy correction: 0.536990 hartree</p> <p>SCF Energy: -1757.739890 hartree<br/>         SCF Energy + ZPVE: -1757.134541 hartree<br/>         Enthalpy: -1757.090567 hartree<br/>         Free Energy: -1757.220748 hartree</p> <p>Free Energy with quasiharmonic correction: -1757.202900 hartree<br/>         (correction: 11.20 kcal/mol)</p> <p><b>B3LYP-D3/6-311+G(d,p)</b></p> <p>SCF Done: E(RB3LYP) = -1758.37043472 A.U.</p> |                          |          |
| Cartesian<br>Coordinates                       | 73<br>spD3-INT2-T2.out                                                                                                                                                                                                                                                                                                                                                                                                                                                                                                                                                                                                                                                                                                     | Energy: -1103394.0977964 |          |
|                                                | O 0.62231                                                                                                                                                                                                                                                                                                                                                                                                                                                                                                                                                                                                                                                                                                                  | -3.87625                 | 0.19764  |
|                                                | C 4.00201                                                                                                                                                                                                                                                                                                                                                                                                                                                                                                                                                                                                                                                                                                                  | 2.38533                  | -1.19968 |
|                                                | O 2.92479                                                                                                                                                                                                                                                                                                                                                                                                                                                                                                                                                                                                                                                                                                                  | 1.85804                  | -1.44297 |
|                                                | O 4.93064                                                                                                                                                                                                                                                                                                                                                                                                                                                                                                                                                                                                                                                                                                                  | 1.87532                  | -0.40306 |
|                                                | C 4.86047                                                                                                                                                                                                                                                                                                                                                                                                                                                                                                                                                                                                                                                                                                                  | -1.55535                 | 1.14573  |
|                                                | C 4.00984                                                                                                                                                                                                                                                                                                                                                                                                                                                                                                                                                                                                                                                                                                                  | -2.62522                 | 1.28534  |
|                                                | N 4.16169                                                                                                                                                                                                                                                                                                                                                                                                                                                                                                                                                                                                                                                                                                                  | -0.50216                 | 0.58696  |
|                                                | C 2.92254                                                                                                                                                                                                                                                                                                                                                                                                                                                                                                                                                                                                                                                                                                                  | -0.93269                 | 0.39961  |
|                                                | N 2.78229                                                                                                                                                                                                                                                                                                                                                                                                                                                                                                                                                                                                                                                                                                                  | -2.21294                 | 0.81320  |
|                                                | H 4.16700                                                                                                                                                                                                                                                                                                                                                                                                                                                                                                                                                                                                                                                                                                                  | -3.62187                 | 1.67007  |
|                                                | H 4.61741                                                                                                                                                                                                                                                                                                                                                                                                                                                                                                                                                                                                                                                                                                                  | 0.97749                  | -0.01335 |
|                                                | H 1.93900                                                                                                                                                                                                                                                                                                                                                                                                                                                                                                                                                                                                                                                                                                                  | -2.80351                 | 0.71499  |
|                                                | H 2.12114                                                                                                                                                                                                                                                                                                                                                                                                                                                                                                                                                                                                                                                                                                                  | -0.34385                 | -0.02405 |
|                                                | C 4.41257                                                                                                                                                                                                                                                                                                                                                                                                                                                                                                                                                                                                                                                                                                                  | 3.73252                  | -1.76419 |
|                                                | H 4.29870                                                                                                                                                                                                                                                                                                                                                                                                                                                                                                                                                                                                                                                                                                                  | 4.49721                  | -0.98682 |
|                                                | H 5.46420                                                                                                                                                                                                                                                                                                                                                                                                                                                                                                                                                                                                                                                                                                                  | 3.72226                  | -2.06517 |
|                                                | H 3.77616                                                                                                                                                                                                                                                                                                                                                                                                                                                                                                                                                                                                                                                                                                                  | 3.99344                  | -2.61151 |
|                                                | C 6.30891                                                                                                                                                                                                                                                                                                                                                                                                                                                                                                                                                                                                                                                                                                                  | -1.44188                 | 1.50496  |
|                                                | H 6.68415                                                                                                                                                                                                                                                                                                                                                                                                                                                                                                                                                                                                                                                                                                                  | -2.38566                 | 1.91439  |
|                                                | H 6.91875                                                                                                                                                                                                                                                                                                                                                                                                                                                                                                                                                                                                                                                                                                                  | -1.18564                 | 0.62958  |
|                                                | H 6.47562                                                                                                                                                                                                                                                                                                                                                                                                                                                                                                                                                                                                                                                                                                                  | -0.65789                 | 2.25426  |
|                                                | C -0.00455                                                                                                                                                                                                                                                                                                                                                                                                                                                                                                                                                                                                                                                                                                                 | -3.28293                 | -0.96649 |
|                                                | C -0.61406                                                                                                                                                                                                                                                                                                                                                                                                                                                                                                                                                                                                                                                                                                                 | -0.83241                 | -1.07978 |
|                                                | O -0.52437                                                                                                                                                                                                                                                                                                                                                                                                                                                                                                                                                                                                                                                                                                                 | 0.21858                  | -0.44061 |
|                                                | C -0.22378                                                                                                                                                                                                                                                                                                                                                                                                                                                                                                                                                                                                                                                                                                                 | -4.69098                 | 1.02464  |
|                                                | H 0.15520                                                                                                                                                                                                                                                                                                                                                                                                                                                                                                                                                                                                                                                                                                                  | -4.60482                 | 2.04953  |
|                                                | H -1.27258                                                                                                                                                                                                                                                                                                                                                                                                                                                                                                                                                                                                                                                                                                                 | -4.36423                 | 0.95061  |



|   |          |          |          |
|---|----------|----------|----------|
| H | -0.15178 | -5.74233 | 0.71111  |
| C | -0.99643 | -2.15647 | -0.53040 |
| C | -2.59440 | -2.59272 | -0.78935 |
| C | -3.49193 | -1.38498 | -0.43967 |
| H | -2.63424 | -2.68424 | -1.90872 |
| O | -2.86259 | -3.68534 | -0.10801 |
| C | -4.12414 | -1.36107 | 0.80845  |
| C | -3.75253 | -0.34314 | -1.33854 |
| C | -4.97216 | -0.31193 | 1.16267  |
| H | -3.94516 | -2.21085 | 1.46131  |
| C | -4.61027 | 0.70584  | -0.99669 |
| H | -3.29119 | -0.36479 | -2.32542 |
| C | -5.22109 | 0.72773  | 0.26027  |
| H | -5.45323 | -0.30660 | 2.13934  |
| H | -4.80821 | 1.50241  | -1.71166 |
| H | -5.89440 | 1.53943  | 0.52806  |
| H | -0.95075 | -2.05922 | 0.55649  |
| O | -0.40194 | -0.85565 | -2.41913 |
| C | -0.03698 | 0.39553  | -3.02347 |
| H | 0.06309  | 0.18222  | -4.08943 |
| H | 0.90830  | 0.76564  | -2.61673 |
| H | -0.81812 | 1.14257  | -2.85764 |
| H | 0.85103  | -2.81688 | -1.46850 |
| C | -0.55986 | -4.35130 | -1.90962 |
| H | -0.79952 | -3.89064 | -2.87445 |
| H | 0.20215  | -5.12226 | -2.07638 |
| H | -1.47322 | -4.78512 | -1.49424 |
| C | -1.59330 | 3.95303  | 0.11166  |
| O | -2.01547 | 5.07267  | -0.17720 |
| C | -2.26546 | 3.14702  | 1.23400  |
| N | -1.57197 | 1.96130  | 1.69081  |
| H | -2.37005 | 3.81767  | 2.08910  |
| H | -3.27016 | 2.88057  | 0.88475  |
| H | -1.51858 | 1.15426  | 1.07619  |
| C | -0.94769 | 1.90656  | 2.90331  |
| O | -0.94527 | 2.83474  | 3.70914  |
| C | -0.27268 | 0.57543  | 3.20833  |
| H | -0.91965 | -0.01451 | 3.86834  |
| H | 0.66026  | 0.77147  | 3.74320  |
| H | -0.06617 | -0.01022 | 2.30831  |
| N | -0.55246 | 3.36501  | -0.52776 |
| H | -0.32040 | 2.39739  | -0.33526 |
| C | 0.12790  | 4.03224  | -1.62106 |
| H | -0.47631 | 4.03849  | -2.53982 |
| H | 0.32183  | 5.07429  | -1.34969 |
| H | 1.07054  | 3.51402  | -1.80995 |

Optimized Molecular Properties for **T2-TS3**

|                                                |                                                                                                                                                                                                                                                                                                                                                                                                                                                                                                                                                                                                                                                                                                                                                                                                                                                                                                                                                                                                                                                                                                                                                                                                                                                                                                                                                                                                                                                                                                                                                                                                                                                                                                                                                                                                                                                                                                                                                                                                                            |          |          |          |          |   |         |         |          |   |         |         |          |   |         |         |          |   |         |          |         |   |         |          |         |   |         |         |         |   |         |          |         |   |         |          |         |   |         |          |         |   |         |         |         |   |         |          |         |   |         |         |          |   |         |         |          |   |         |         |          |   |         |         |          |   |         |         |          |   |         |          |         |   |         |          |         |   |         |          |         |   |         |          |         |   |         |          |          |   |          |          |          |   |          |         |          |   |         |          |         |   |         |          |         |   |         |          |         |
|------------------------------------------------|----------------------------------------------------------------------------------------------------------------------------------------------------------------------------------------------------------------------------------------------------------------------------------------------------------------------------------------------------------------------------------------------------------------------------------------------------------------------------------------------------------------------------------------------------------------------------------------------------------------------------------------------------------------------------------------------------------------------------------------------------------------------------------------------------------------------------------------------------------------------------------------------------------------------------------------------------------------------------------------------------------------------------------------------------------------------------------------------------------------------------------------------------------------------------------------------------------------------------------------------------------------------------------------------------------------------------------------------------------------------------------------------------------------------------------------------------------------------------------------------------------------------------------------------------------------------------------------------------------------------------------------------------------------------------------------------------------------------------------------------------------------------------------------------------------------------------------------------------------------------------------------------------------------------------------------------------------------------------------------------------------------------------|----------|----------|----------|----------|---|---------|---------|----------|---|---------|---------|----------|---|---------|---------|----------|---|---------|----------|---------|---|---------|----------|---------|---|---------|---------|---------|---|---------|----------|---------|---|---------|----------|---------|---|---------|----------|---------|---|---------|---------|---------|---|---------|----------|---------|---|---------|---------|----------|---|---------|---------|----------|---|---------|---------|----------|---|---------|---------|----------|---|---------|---------|----------|---|---------|----------|---------|---|---------|----------|---------|---|---------|----------|---------|---|---------|----------|---------|---|---------|----------|----------|---|----------|----------|----------|---|----------|---------|----------|---|---------|----------|---------|---|---------|----------|---------|---|---------|----------|---------|
| Number of<br>(-)<br>Vibrational<br>Frequencies | 1 (-1531.0551)                                                                                                                                                                                                                                                                                                                                                                                                                                                                                                                                                                                                                                                                                                                                                                                                                                                                                                                                                                                                                                                                                                                                                                                                                                                                                                                                                                                                                                                                                                                                                                                                                                                                                                                                                                                                                                                                                                                                                                                                             |          |          |          |          |   |         |         |          |   |         |         |          |   |         |         |          |   |         |          |         |   |         |          |         |   |         |         |         |   |         |          |         |   |         |          |         |   |         |          |         |   |         |         |         |   |         |          |         |   |         |         |          |   |         |         |          |   |         |         |          |   |         |         |          |   |         |         |          |   |         |          |         |   |         |          |         |   |         |          |         |   |         |          |         |   |         |          |          |   |          |          |          |   |          |         |          |   |         |          |         |   |         |          |         |   |         |          |         |
| Absolute<br>Energies<br>(Hartrees)             | <p><b>B3LYP/6-31G(d)</b></p> <p>There are 22 positive frequencies below 100 cm<sup>-1</sup>.</p> <p>Zero-point correction: 0.601075 hartree<br/>         Enthalpy correction: 0.644596 hartree<br/>         Free Energy correction: 0.515182 hartree<br/>         Quasiharmonic Free Energy correction: 0.532796 hartree</p> <p>SCF Energy: -1757.698727 hartree<br/>         SCF Energy + ZPVE: -1757.097652 hartree<br/>         Enthalpy: -1757.054131 hartree<br/>         Free Energy: -1757.183545 hartree</p> <p>Free Energy with quasiharmonic correction: -1757.165931 hartree<br/>         (correction: 11.05 kcal/mol)</p> <p><b>B3LYP-D3/6-311+G(d,p)</b></p> <p>SCF Done: E(RB3LYP) = -1758.32767378 A.U.</p>                                                                                                                                                                                                                                                                                                                                                                                                                                                                                                                                                                                                                                                                                                                                                                                                                                                                                                                                                                                                                                                                                                                                                                                                                                                                                                 |          |          |          |          |   |         |         |          |   |         |         |          |   |         |         |          |   |         |          |         |   |         |          |         |   |         |         |         |   |         |          |         |   |         |          |         |   |         |          |         |   |         |         |         |   |         |          |         |   |         |         |          |   |         |         |          |   |         |         |          |   |         |         |          |   |         |         |          |   |         |          |         |   |         |          |         |   |         |          |         |   |         |          |         |   |         |          |          |   |          |          |          |   |          |         |          |   |         |          |         |   |         |          |         |   |         |          |         |
| Cartesian<br>Coordinates                       | <p>73<br/>         spD3-TS3-T2.out Energy: -1103367.2649017</p> <table> <tr><td>O</td><td>1.71575</td><td>-3.25688</td><td>-0.33355</td></tr> <tr><td>C</td><td>5.10136</td><td>3.05960</td><td>-0.99809</td></tr> <tr><td>O</td><td>4.09512</td><td>2.48487</td><td>-1.38494</td></tr> <tr><td>O</td><td>6.00279</td><td>2.53907</td><td>-0.17442</td></tr> <tr><td>C</td><td>5.84729</td><td>-0.99065</td><td>1.21926</td></tr> <tr><td>C</td><td>4.98859</td><td>-2.06353</td><td>1.22121</td></tr> <tr><td>N</td><td>5.25936</td><td>0.04845</td><td>0.52315</td></tr> <tr><td>C</td><td>4.07590</td><td>-0.39409</td><td>0.12180</td></tr> <tr><td>N</td><td>3.86808</td><td>-1.66719</td><td>0.52333</td></tr> <tr><td>H</td><td>5.07494</td><td>-3.04981</td><td>1.65246</td></tr> <tr><td>H</td><td>5.72421</td><td>1.58727</td><td>0.09494</td></tr> <tr><td>H</td><td>3.03819</td><td>-2.24345</td><td>0.30678</td></tr> <tr><td>H</td><td>3.36125</td><td>0.17654</td><td>-0.45304</td></tr> <tr><td>C</td><td>5.46088</td><td>4.47398</td><td>-1.41487</td></tr> <tr><td>H</td><td>5.50615</td><td>5.12122</td><td>-0.53210</td></tr> <tr><td>H</td><td>6.45298</td><td>4.48864</td><td>-1.87886</td></tr> <tr><td>H</td><td>4.71605</td><td>4.85618</td><td>-2.11452</td></tr> <tr><td>C</td><td>7.20481</td><td>-0.86279</td><td>1.83641</td></tr> <tr><td>H</td><td>7.96617</td><td>-0.62288</td><td>1.08347</td></tr> <tr><td>H</td><td>7.23012</td><td>-0.06224</td><td>2.58640</td></tr> <tr><td>H</td><td>7.49866</td><td>-1.79567</td><td>2.32900</td></tr> <tr><td>C</td><td>0.84419</td><td>-2.47152</td><td>-1.21021</td></tr> <tr><td>C</td><td>-0.39445</td><td>-0.29283</td><td>-0.74270</td></tr> <tr><td>O</td><td>-1.37728</td><td>0.41035</td><td>-0.49318</td></tr> <tr><td>C</td><td>1.11085</td><td>-4.27153</td><td>0.46859</td></tr> <tr><td>H</td><td>1.91677</td><td>-4.69382</td><td>1.07891</td></tr> <tr><td>H</td><td>0.32641</td><td>-3.86293</td><td>1.11805</td></tr> </table> | O        | 1.71575  | -3.25688 | -0.33355 | C | 5.10136 | 3.05960 | -0.99809 | O | 4.09512 | 2.48487 | -1.38494 | O | 6.00279 | 2.53907 | -0.17442 | C | 5.84729 | -0.99065 | 1.21926 | C | 4.98859 | -2.06353 | 1.22121 | N | 5.25936 | 0.04845 | 0.52315 | C | 4.07590 | -0.39409 | 0.12180 | N | 3.86808 | -1.66719 | 0.52333 | H | 5.07494 | -3.04981 | 1.65246 | H | 5.72421 | 1.58727 | 0.09494 | H | 3.03819 | -2.24345 | 0.30678 | H | 3.36125 | 0.17654 | -0.45304 | C | 5.46088 | 4.47398 | -1.41487 | H | 5.50615 | 5.12122 | -0.53210 | H | 6.45298 | 4.48864 | -1.87886 | H | 4.71605 | 4.85618 | -2.11452 | C | 7.20481 | -0.86279 | 1.83641 | H | 7.96617 | -0.62288 | 1.08347 | H | 7.23012 | -0.06224 | 2.58640 | H | 7.49866 | -1.79567 | 2.32900 | C | 0.84419 | -2.47152 | -1.21021 | C | -0.39445 | -0.29283 | -0.74270 | O | -1.37728 | 0.41035 | -0.49318 | C | 1.11085 | -4.27153 | 0.46859 | H | 1.91677 | -4.69382 | 1.07891 | H | 0.32641 | -3.86293 | 1.11805 |
| O                                              | 1.71575                                                                                                                                                                                                                                                                                                                                                                                                                                                                                                                                                                                                                                                                                                                                                                                                                                                                                                                                                                                                                                                                                                                                                                                                                                                                                                                                                                                                                                                                                                                                                                                                                                                                                                                                                                                                                                                                                                                                                                                                                    | -3.25688 | -0.33355 |          |          |   |         |         |          |   |         |         |          |   |         |         |          |   |         |          |         |   |         |          |         |   |         |         |         |   |         |          |         |   |         |          |         |   |         |          |         |   |         |         |         |   |         |          |         |   |         |         |          |   |         |         |          |   |         |         |          |   |         |         |          |   |         |         |          |   |         |          |         |   |         |          |         |   |         |          |         |   |         |          |         |   |         |          |          |   |          |          |          |   |          |         |          |   |         |          |         |   |         |          |         |   |         |          |         |
| C                                              | 5.10136                                                                                                                                                                                                                                                                                                                                                                                                                                                                                                                                                                                                                                                                                                                                                                                                                                                                                                                                                                                                                                                                                                                                                                                                                                                                                                                                                                                                                                                                                                                                                                                                                                                                                                                                                                                                                                                                                                                                                                                                                    | 3.05960  | -0.99809 |          |          |   |         |         |          |   |         |         |          |   |         |         |          |   |         |          |         |   |         |          |         |   |         |         |         |   |         |          |         |   |         |          |         |   |         |          |         |   |         |         |         |   |         |          |         |   |         |         |          |   |         |         |          |   |         |         |          |   |         |         |          |   |         |         |          |   |         |          |         |   |         |          |         |   |         |          |         |   |         |          |         |   |         |          |          |   |          |          |          |   |          |         |          |   |         |          |         |   |         |          |         |   |         |          |         |
| O                                              | 4.09512                                                                                                                                                                                                                                                                                                                                                                                                                                                                                                                                                                                                                                                                                                                                                                                                                                                                                                                                                                                                                                                                                                                                                                                                                                                                                                                                                                                                                                                                                                                                                                                                                                                                                                                                                                                                                                                                                                                                                                                                                    | 2.48487  | -1.38494 |          |          |   |         |         |          |   |         |         |          |   |         |         |          |   |         |          |         |   |         |          |         |   |         |         |         |   |         |          |         |   |         |          |         |   |         |          |         |   |         |         |         |   |         |          |         |   |         |         |          |   |         |         |          |   |         |         |          |   |         |         |          |   |         |         |          |   |         |          |         |   |         |          |         |   |         |          |         |   |         |          |         |   |         |          |          |   |          |          |          |   |          |         |          |   |         |          |         |   |         |          |         |   |         |          |         |
| O                                              | 6.00279                                                                                                                                                                                                                                                                                                                                                                                                                                                                                                                                                                                                                                                                                                                                                                                                                                                                                                                                                                                                                                                                                                                                                                                                                                                                                                                                                                                                                                                                                                                                                                                                                                                                                                                                                                                                                                                                                                                                                                                                                    | 2.53907  | -0.17442 |          |          |   |         |         |          |   |         |         |          |   |         |         |          |   |         |          |         |   |         |          |         |   |         |         |         |   |         |          |         |   |         |          |         |   |         |          |         |   |         |         |         |   |         |          |         |   |         |         |          |   |         |         |          |   |         |         |          |   |         |         |          |   |         |         |          |   |         |          |         |   |         |          |         |   |         |          |         |   |         |          |         |   |         |          |          |   |          |          |          |   |          |         |          |   |         |          |         |   |         |          |         |   |         |          |         |
| C                                              | 5.84729                                                                                                                                                                                                                                                                                                                                                                                                                                                                                                                                                                                                                                                                                                                                                                                                                                                                                                                                                                                                                                                                                                                                                                                                                                                                                                                                                                                                                                                                                                                                                                                                                                                                                                                                                                                                                                                                                                                                                                                                                    | -0.99065 | 1.21926  |          |          |   |         |         |          |   |         |         |          |   |         |         |          |   |         |          |         |   |         |          |         |   |         |         |         |   |         |          |         |   |         |          |         |   |         |          |         |   |         |         |         |   |         |          |         |   |         |         |          |   |         |         |          |   |         |         |          |   |         |         |          |   |         |         |          |   |         |          |         |   |         |          |         |   |         |          |         |   |         |          |         |   |         |          |          |   |          |          |          |   |          |         |          |   |         |          |         |   |         |          |         |   |         |          |         |
| C                                              | 4.98859                                                                                                                                                                                                                                                                                                                                                                                                                                                                                                                                                                                                                                                                                                                                                                                                                                                                                                                                                                                                                                                                                                                                                                                                                                                                                                                                                                                                                                                                                                                                                                                                                                                                                                                                                                                                                                                                                                                                                                                                                    | -2.06353 | 1.22121  |          |          |   |         |         |          |   |         |         |          |   |         |         |          |   |         |          |         |   |         |          |         |   |         |         |         |   |         |          |         |   |         |          |         |   |         |          |         |   |         |         |         |   |         |          |         |   |         |         |          |   |         |         |          |   |         |         |          |   |         |         |          |   |         |         |          |   |         |          |         |   |         |          |         |   |         |          |         |   |         |          |         |   |         |          |          |   |          |          |          |   |          |         |          |   |         |          |         |   |         |          |         |   |         |          |         |
| N                                              | 5.25936                                                                                                                                                                                                                                                                                                                                                                                                                                                                                                                                                                                                                                                                                                                                                                                                                                                                                                                                                                                                                                                                                                                                                                                                                                                                                                                                                                                                                                                                                                                                                                                                                                                                                                                                                                                                                                                                                                                                                                                                                    | 0.04845  | 0.52315  |          |          |   |         |         |          |   |         |         |          |   |         |         |          |   |         |          |         |   |         |          |         |   |         |         |         |   |         |          |         |   |         |          |         |   |         |          |         |   |         |         |         |   |         |          |         |   |         |         |          |   |         |         |          |   |         |         |          |   |         |         |          |   |         |         |          |   |         |          |         |   |         |          |         |   |         |          |         |   |         |          |         |   |         |          |          |   |          |          |          |   |          |         |          |   |         |          |         |   |         |          |         |   |         |          |         |
| C                                              | 4.07590                                                                                                                                                                                                                                                                                                                                                                                                                                                                                                                                                                                                                                                                                                                                                                                                                                                                                                                                                                                                                                                                                                                                                                                                                                                                                                                                                                                                                                                                                                                                                                                                                                                                                                                                                                                                                                                                                                                                                                                                                    | -0.39409 | 0.12180  |          |          |   |         |         |          |   |         |         |          |   |         |         |          |   |         |          |         |   |         |          |         |   |         |         |         |   |         |          |         |   |         |          |         |   |         |          |         |   |         |         |         |   |         |          |         |   |         |         |          |   |         |         |          |   |         |         |          |   |         |         |          |   |         |         |          |   |         |          |         |   |         |          |         |   |         |          |         |   |         |          |         |   |         |          |          |   |          |          |          |   |          |         |          |   |         |          |         |   |         |          |         |   |         |          |         |
| N                                              | 3.86808                                                                                                                                                                                                                                                                                                                                                                                                                                                                                                                                                                                                                                                                                                                                                                                                                                                                                                                                                                                                                                                                                                                                                                                                                                                                                                                                                                                                                                                                                                                                                                                                                                                                                                                                                                                                                                                                                                                                                                                                                    | -1.66719 | 0.52333  |          |          |   |         |         |          |   |         |         |          |   |         |         |          |   |         |          |         |   |         |          |         |   |         |         |         |   |         |          |         |   |         |          |         |   |         |          |         |   |         |         |         |   |         |          |         |   |         |         |          |   |         |         |          |   |         |         |          |   |         |         |          |   |         |         |          |   |         |          |         |   |         |          |         |   |         |          |         |   |         |          |         |   |         |          |          |   |          |          |          |   |          |         |          |   |         |          |         |   |         |          |         |   |         |          |         |
| H                                              | 5.07494                                                                                                                                                                                                                                                                                                                                                                                                                                                                                                                                                                                                                                                                                                                                                                                                                                                                                                                                                                                                                                                                                                                                                                                                                                                                                                                                                                                                                                                                                                                                                                                                                                                                                                                                                                                                                                                                                                                                                                                                                    | -3.04981 | 1.65246  |          |          |   |         |         |          |   |         |         |          |   |         |         |          |   |         |          |         |   |         |          |         |   |         |         |         |   |         |          |         |   |         |          |         |   |         |          |         |   |         |         |         |   |         |          |         |   |         |         |          |   |         |         |          |   |         |         |          |   |         |         |          |   |         |         |          |   |         |          |         |   |         |          |         |   |         |          |         |   |         |          |         |   |         |          |          |   |          |          |          |   |          |         |          |   |         |          |         |   |         |          |         |   |         |          |         |
| H                                              | 5.72421                                                                                                                                                                                                                                                                                                                                                                                                                                                                                                                                                                                                                                                                                                                                                                                                                                                                                                                                                                                                                                                                                                                                                                                                                                                                                                                                                                                                                                                                                                                                                                                                                                                                                                                                                                                                                                                                                                                                                                                                                    | 1.58727  | 0.09494  |          |          |   |         |         |          |   |         |         |          |   |         |         |          |   |         |          |         |   |         |          |         |   |         |         |         |   |         |          |         |   |         |          |         |   |         |          |         |   |         |         |         |   |         |          |         |   |         |         |          |   |         |         |          |   |         |         |          |   |         |         |          |   |         |         |          |   |         |          |         |   |         |          |         |   |         |          |         |   |         |          |         |   |         |          |          |   |          |          |          |   |          |         |          |   |         |          |         |   |         |          |         |   |         |          |         |
| H                                              | 3.03819                                                                                                                                                                                                                                                                                                                                                                                                                                                                                                                                                                                                                                                                                                                                                                                                                                                                                                                                                                                                                                                                                                                                                                                                                                                                                                                                                                                                                                                                                                                                                                                                                                                                                                                                                                                                                                                                                                                                                                                                                    | -2.24345 | 0.30678  |          |          |   |         |         |          |   |         |         |          |   |         |         |          |   |         |          |         |   |         |          |         |   |         |         |         |   |         |          |         |   |         |          |         |   |         |          |         |   |         |         |         |   |         |          |         |   |         |         |          |   |         |         |          |   |         |         |          |   |         |         |          |   |         |         |          |   |         |          |         |   |         |          |         |   |         |          |         |   |         |          |         |   |         |          |          |   |          |          |          |   |          |         |          |   |         |          |         |   |         |          |         |   |         |          |         |
| H                                              | 3.36125                                                                                                                                                                                                                                                                                                                                                                                                                                                                                                                                                                                                                                                                                                                                                                                                                                                                                                                                                                                                                                                                                                                                                                                                                                                                                                                                                                                                                                                                                                                                                                                                                                                                                                                                                                                                                                                                                                                                                                                                                    | 0.17654  | -0.45304 |          |          |   |         |         |          |   |         |         |          |   |         |         |          |   |         |          |         |   |         |          |         |   |         |         |         |   |         |          |         |   |         |          |         |   |         |          |         |   |         |         |         |   |         |          |         |   |         |         |          |   |         |         |          |   |         |         |          |   |         |         |          |   |         |         |          |   |         |          |         |   |         |          |         |   |         |          |         |   |         |          |         |   |         |          |          |   |          |          |          |   |          |         |          |   |         |          |         |   |         |          |         |   |         |          |         |
| C                                              | 5.46088                                                                                                                                                                                                                                                                                                                                                                                                                                                                                                                                                                                                                                                                                                                                                                                                                                                                                                                                                                                                                                                                                                                                                                                                                                                                                                                                                                                                                                                                                                                                                                                                                                                                                                                                                                                                                                                                                                                                                                                                                    | 4.47398  | -1.41487 |          |          |   |         |         |          |   |         |         |          |   |         |         |          |   |         |          |         |   |         |          |         |   |         |         |         |   |         |          |         |   |         |          |         |   |         |          |         |   |         |         |         |   |         |          |         |   |         |         |          |   |         |         |          |   |         |         |          |   |         |         |          |   |         |         |          |   |         |          |         |   |         |          |         |   |         |          |         |   |         |          |         |   |         |          |          |   |          |          |          |   |          |         |          |   |         |          |         |   |         |          |         |   |         |          |         |
| H                                              | 5.50615                                                                                                                                                                                                                                                                                                                                                                                                                                                                                                                                                                                                                                                                                                                                                                                                                                                                                                                                                                                                                                                                                                                                                                                                                                                                                                                                                                                                                                                                                                                                                                                                                                                                                                                                                                                                                                                                                                                                                                                                                    | 5.12122  | -0.53210 |          |          |   |         |         |          |   |         |         |          |   |         |         |          |   |         |          |         |   |         |          |         |   |         |         |         |   |         |          |         |   |         |          |         |   |         |          |         |   |         |         |         |   |         |          |         |   |         |         |          |   |         |         |          |   |         |         |          |   |         |         |          |   |         |         |          |   |         |          |         |   |         |          |         |   |         |          |         |   |         |          |         |   |         |          |          |   |          |          |          |   |          |         |          |   |         |          |         |   |         |          |         |   |         |          |         |
| H                                              | 6.45298                                                                                                                                                                                                                                                                                                                                                                                                                                                                                                                                                                                                                                                                                                                                                                                                                                                                                                                                                                                                                                                                                                                                                                                                                                                                                                                                                                                                                                                                                                                                                                                                                                                                                                                                                                                                                                                                                                                                                                                                                    | 4.48864  | -1.87886 |          |          |   |         |         |          |   |         |         |          |   |         |         |          |   |         |          |         |   |         |          |         |   |         |         |         |   |         |          |         |   |         |          |         |   |         |          |         |   |         |         |         |   |         |          |         |   |         |         |          |   |         |         |          |   |         |         |          |   |         |         |          |   |         |         |          |   |         |          |         |   |         |          |         |   |         |          |         |   |         |          |         |   |         |          |          |   |          |          |          |   |          |         |          |   |         |          |         |   |         |          |         |   |         |          |         |
| H                                              | 4.71605                                                                                                                                                                                                                                                                                                                                                                                                                                                                                                                                                                                                                                                                                                                                                                                                                                                                                                                                                                                                                                                                                                                                                                                                                                                                                                                                                                                                                                                                                                                                                                                                                                                                                                                                                                                                                                                                                                                                                                                                                    | 4.85618  | -2.11452 |          |          |   |         |         |          |   |         |         |          |   |         |         |          |   |         |          |         |   |         |          |         |   |         |         |         |   |         |          |         |   |         |          |         |   |         |          |         |   |         |         |         |   |         |          |         |   |         |         |          |   |         |         |          |   |         |         |          |   |         |         |          |   |         |         |          |   |         |          |         |   |         |          |         |   |         |          |         |   |         |          |         |   |         |          |          |   |          |          |          |   |          |         |          |   |         |          |         |   |         |          |         |   |         |          |         |
| C                                              | 7.20481                                                                                                                                                                                                                                                                                                                                                                                                                                                                                                                                                                                                                                                                                                                                                                                                                                                                                                                                                                                                                                                                                                                                                                                                                                                                                                                                                                                                                                                                                                                                                                                                                                                                                                                                                                                                                                                                                                                                                                                                                    | -0.86279 | 1.83641  |          |          |   |         |         |          |   |         |         |          |   |         |         |          |   |         |          |         |   |         |          |         |   |         |         |         |   |         |          |         |   |         |          |         |   |         |          |         |   |         |         |         |   |         |          |         |   |         |         |          |   |         |         |          |   |         |         |          |   |         |         |          |   |         |         |          |   |         |          |         |   |         |          |         |   |         |          |         |   |         |          |         |   |         |          |          |   |          |          |          |   |          |         |          |   |         |          |         |   |         |          |         |   |         |          |         |
| H                                              | 7.96617                                                                                                                                                                                                                                                                                                                                                                                                                                                                                                                                                                                                                                                                                                                                                                                                                                                                                                                                                                                                                                                                                                                                                                                                                                                                                                                                                                                                                                                                                                                                                                                                                                                                                                                                                                                                                                                                                                                                                                                                                    | -0.62288 | 1.08347  |          |          |   |         |         |          |   |         |         |          |   |         |         |          |   |         |          |         |   |         |          |         |   |         |         |         |   |         |          |         |   |         |          |         |   |         |          |         |   |         |         |         |   |         |          |         |   |         |         |          |   |         |         |          |   |         |         |          |   |         |         |          |   |         |         |          |   |         |          |         |   |         |          |         |   |         |          |         |   |         |          |         |   |         |          |          |   |          |          |          |   |          |         |          |   |         |          |         |   |         |          |         |   |         |          |         |
| H                                              | 7.23012                                                                                                                                                                                                                                                                                                                                                                                                                                                                                                                                                                                                                                                                                                                                                                                                                                                                                                                                                                                                                                                                                                                                                                                                                                                                                                                                                                                                                                                                                                                                                                                                                                                                                                                                                                                                                                                                                                                                                                                                                    | -0.06224 | 2.58640  |          |          |   |         |         |          |   |         |         |          |   |         |         |          |   |         |          |         |   |         |          |         |   |         |         |         |   |         |          |         |   |         |          |         |   |         |          |         |   |         |         |         |   |         |          |         |   |         |         |          |   |         |         |          |   |         |         |          |   |         |         |          |   |         |         |          |   |         |          |         |   |         |          |         |   |         |          |         |   |         |          |         |   |         |          |          |   |          |          |          |   |          |         |          |   |         |          |         |   |         |          |         |   |         |          |         |
| H                                              | 7.49866                                                                                                                                                                                                                                                                                                                                                                                                                                                                                                                                                                                                                                                                                                                                                                                                                                                                                                                                                                                                                                                                                                                                                                                                                                                                                                                                                                                                                                                                                                                                                                                                                                                                                                                                                                                                                                                                                                                                                                                                                    | -1.79567 | 2.32900  |          |          |   |         |         |          |   |         |         |          |   |         |         |          |   |         |          |         |   |         |          |         |   |         |         |         |   |         |          |         |   |         |          |         |   |         |          |         |   |         |         |         |   |         |          |         |   |         |         |          |   |         |         |          |   |         |         |          |   |         |         |          |   |         |         |          |   |         |          |         |   |         |          |         |   |         |          |         |   |         |          |         |   |         |          |          |   |          |          |          |   |          |         |          |   |         |          |         |   |         |          |         |   |         |          |         |
| C                                              | 0.84419                                                                                                                                                                                                                                                                                                                                                                                                                                                                                                                                                                                                                                                                                                                                                                                                                                                                                                                                                                                                                                                                                                                                                                                                                                                                                                                                                                                                                                                                                                                                                                                                                                                                                                                                                                                                                                                                                                                                                                                                                    | -2.47152 | -1.21021 |          |          |   |         |         |          |   |         |         |          |   |         |         |          |   |         |          |         |   |         |          |         |   |         |         |         |   |         |          |         |   |         |          |         |   |         |          |         |   |         |         |         |   |         |          |         |   |         |         |          |   |         |         |          |   |         |         |          |   |         |         |          |   |         |         |          |   |         |          |         |   |         |          |         |   |         |          |         |   |         |          |         |   |         |          |          |   |          |          |          |   |          |         |          |   |         |          |         |   |         |          |         |   |         |          |         |
| C                                              | -0.39445                                                                                                                                                                                                                                                                                                                                                                                                                                                                                                                                                                                                                                                                                                                                                                                                                                                                                                                                                                                                                                                                                                                                                                                                                                                                                                                                                                                                                                                                                                                                                                                                                                                                                                                                                                                                                                                                                                                                                                                                                   | -0.29283 | -0.74270 |          |          |   |         |         |          |   |         |         |          |   |         |         |          |   |         |          |         |   |         |          |         |   |         |         |         |   |         |          |         |   |         |          |         |   |         |          |         |   |         |         |         |   |         |          |         |   |         |         |          |   |         |         |          |   |         |         |          |   |         |         |          |   |         |         |          |   |         |          |         |   |         |          |         |   |         |          |         |   |         |          |         |   |         |          |          |   |          |          |          |   |          |         |          |   |         |          |         |   |         |          |         |   |         |          |         |
| O                                              | -1.37728                                                                                                                                                                                                                                                                                                                                                                                                                                                                                                                                                                                                                                                                                                                                                                                                                                                                                                                                                                                                                                                                                                                                                                                                                                                                                                                                                                                                                                                                                                                                                                                                                                                                                                                                                                                                                                                                                                                                                                                                                   | 0.41035  | -0.49318 |          |          |   |         |         |          |   |         |         |          |   |         |         |          |   |         |          |         |   |         |          |         |   |         |         |         |   |         |          |         |   |         |          |         |   |         |          |         |   |         |         |         |   |         |          |         |   |         |         |          |   |         |         |          |   |         |         |          |   |         |         |          |   |         |         |          |   |         |          |         |   |         |          |         |   |         |          |         |   |         |          |         |   |         |          |          |   |          |          |          |   |          |         |          |   |         |          |         |   |         |          |         |   |         |          |         |
| C                                              | 1.11085                                                                                                                                                                                                                                                                                                                                                                                                                                                                                                                                                                                                                                                                                                                                                                                                                                                                                                                                                                                                                                                                                                                                                                                                                                                                                                                                                                                                                                                                                                                                                                                                                                                                                                                                                                                                                                                                                                                                                                                                                    | -4.27153 | 0.46859  |          |          |   |         |         |          |   |         |         |          |   |         |         |          |   |         |          |         |   |         |          |         |   |         |         |         |   |         |          |         |   |         |          |         |   |         |          |         |   |         |         |         |   |         |          |         |   |         |         |          |   |         |         |          |   |         |         |          |   |         |         |          |   |         |         |          |   |         |          |         |   |         |          |         |   |         |          |         |   |         |          |         |   |         |          |          |   |          |          |          |   |          |         |          |   |         |          |         |   |         |          |         |   |         |          |         |
| H                                              | 1.91677                                                                                                                                                                                                                                                                                                                                                                                                                                                                                                                                                                                                                                                                                                                                                                                                                                                                                                                                                                                                                                                                                                                                                                                                                                                                                                                                                                                                                                                                                                                                                                                                                                                                                                                                                                                                                                                                                                                                                                                                                    | -4.69382 | 1.07891  |          |          |   |         |         |          |   |         |         |          |   |         |         |          |   |         |          |         |   |         |          |         |   |         |         |         |   |         |          |         |   |         |          |         |   |         |          |         |   |         |         |         |   |         |          |         |   |         |         |          |   |         |         |          |   |         |         |          |   |         |         |          |   |         |         |          |   |         |          |         |   |         |          |         |   |         |          |         |   |         |          |         |   |         |          |          |   |          |          |          |   |          |         |          |   |         |          |         |   |         |          |         |   |         |          |         |
| H                                              | 0.32641                                                                                                                                                                                                                                                                                                                                                                                                                                                                                                                                                                                                                                                                                                                                                                                                                                                                                                                                                                                                                                                                                                                                                                                                                                                                                                                                                                                                                                                                                                                                                                                                                                                                                                                                                                                                                                                                                                                                                                                                                    | -3.86293 | 1.11805  |          |          |   |         |         |          |   |         |         |          |   |         |         |          |   |         |          |         |   |         |          |         |   |         |         |         |   |         |          |         |   |         |          |         |   |         |          |         |   |         |         |         |   |         |          |         |   |         |         |          |   |         |         |          |   |         |         |          |   |         |         |          |   |         |         |          |   |         |          |         |   |         |          |         |   |         |          |         |   |         |          |         |   |         |          |          |   |          |          |          |   |          |         |          |   |         |          |         |   |         |          |         |   |         |          |         |

|   |          |          |          |
|---|----------|----------|----------|
| H | 0.69779  | -5.07709 | -0.15536 |
| C | -0.26517 | -1.71981 | -0.48154 |
| C | -1.52751 | -2.49115 | 0.00760  |
| C | -2.91897 | -2.08631 | -0.46640 |
| H | -1.42441 | -3.54241 | -0.33790 |
| O | -1.32554 | -2.38970 | 1.40293  |
| C | -3.95639 | -2.00561 | 0.46938  |
| C | -3.23000 | -1.90769 | -1.82167 |
| C | -5.26831 | -1.74401 | 0.06431  |
| H | -3.70093 | -2.15224 | 1.51378  |
| C | -4.53648 | -1.64089 | -2.23021 |
| H | -2.43704 | -1.96639 | -2.56441 |
| C | -5.56518 | -1.55803 | -1.28737 |
| H | -6.06099 | -1.68638 | 0.80790  |
| H | -4.75294 | -1.49059 | -3.28621 |
| H | -6.58428 | -1.34739 | -1.60400 |
| H | -0.21718 | -1.78416 | 0.83680  |
| O | 0.76020  | 0.29280  | -1.21295 |
| C | 0.73489  | 1.71903  | -1.33656 |
| H | 1.74818  | 2.01496  | -1.60975 |
| H | 0.44869  | 2.18647  | -0.38950 |
| H | 0.02144  | 2.02820  | -2.10832 |
| H | 1.54674  | -1.73657 | -1.60547 |
| C | 0.39110  | -3.34138 | -2.39030 |
| H | -0.08798 | -2.71065 | -3.14797 |
| H | 1.25616  | -3.83582 | -2.84809 |
| H | -0.33122 | -4.10872 | -2.09576 |
| C | -4.19018 | 2.97452  | 0.08377  |
| O | -5.08382 | 3.77896  | -0.18231 |
| C | -4.41971 | 1.92218  | 1.17923  |
| N | -3.26500 | 1.19005  | 1.64856  |
| H | -4.84947 | 2.44233  | 2.03756  |
| H | -5.17486 | 1.22654  | 0.79037  |
| H | -2.82646 | 0.50801  | 1.03642  |
| C | -2.74544 | 1.37547  | 2.90040  |
| O | -3.22390 | 2.16410  | 3.71488  |
| C | -1.51041 | 0.53824  | 3.19448  |
| H | -1.50670 | -0.42016 | 2.66094  |
| H | -1.45187 | 0.37382  | 4.27344  |
| H | -0.61705 | 1.09993  | 2.89159  |
| N | -2.99328 | 2.93010  | -0.55768 |
| H | -2.35670 | 2.15860  | -0.37557 |
| C | -2.70348 | 3.80020  | -1.67734 |
| H | -2.62895 | 3.23466  | -2.61625 |
| H | -3.52113 | 4.51873  | -1.75975 |
| H | -1.76049 | 4.34045  | -1.52424 |

Optimized Molecular Properties for **T2-INT3**

|                                                |                                                                                                                                                                                                                                                                                                                                                                                                                                                                                                                                                                                                                                                                                                                            |                          |          |
|------------------------------------------------|----------------------------------------------------------------------------------------------------------------------------------------------------------------------------------------------------------------------------------------------------------------------------------------------------------------------------------------------------------------------------------------------------------------------------------------------------------------------------------------------------------------------------------------------------------------------------------------------------------------------------------------------------------------------------------------------------------------------------|--------------------------|----------|
| Number of<br>(-)<br>Vibrational<br>Frequencies | 0                                                                                                                                                                                                                                                                                                                                                                                                                                                                                                                                                                                                                                                                                                                          |                          |          |
| Absolute<br>Energies<br>(Hartrees)             | <p><b>B3LYP/6-31G(d)</b></p> <p>There are 23 positive frequencies below 100 cm<sup>-1</sup>.</p> <p>Zero-point correction: 0.606231 hartree<br/>         Enthalpy correction: 0.650146 hartree<br/>         Free Energy correction: 0.519299 hartree<br/>         Quasiharmonic Free Energy correction: 0.537513 hartree</p> <p>SCF Energy: -1757.764828 hartree<br/>         SCF Energy + ZPVE: -1757.158597 hartree<br/>         Enthalpy: -1757.114682 hartree<br/>         Free Energy: -1757.245529 hartree</p> <p>Free Energy with quasiharmonic correction: -1757.227315 hartree<br/>         (correction: 11.43 kcal/mol)</p> <p><b>B3LYP-D3/6-311+G(d,p)</b></p> <p>SCF Done: E(RB3LYP) = -1758.39375312 A.U.</p> |                          |          |
| Cartesian<br>Coordinates                       | 73<br>spD3-INT3-T2.out                                                                                                                                                                                                                                                                                                                                                                                                                                                                                                                                                                                                                                                                                                     | Energy: -1103408.7303132 |          |
|                                                | O 1.64745                                                                                                                                                                                                                                                                                                                                                                                                                                                                                                                                                                                                                                                                                                                  | -0.37039                 | 2.31524  |
|                                                | C 8.65106                                                                                                                                                                                                                                                                                                                                                                                                                                                                                                                                                                                                                                                                                                                  | -0.27016                 | 0.15887  |
|                                                | O 8.00891                                                                                                                                                                                                                                                                                                                                                                                                                                                                                                                                                                                                                                                                                                                  | -0.13402                 | 1.18929  |
|                                                | O 8.13295                                                                                                                                                                                                                                                                                                                                                                                                                                                                                                                                                                                                                                                                                                                  | -0.42340                 | -1.05287 |
|                                                | C 4.41493                                                                                                                                                                                                                                                                                                                                                                                                                                                                                                                                                                                                                                                                                                                  | -0.55606                 | -1.80614 |
|                                                | C 3.22427                                                                                                                                                                                                                                                                                                                                                                                                                                                                                                                                                                                                                                                                                                                  | -0.48004                 | -1.12394 |
|                                                | N 5.45981                                                                                                                                                                                                                                                                                                                                                                                                                                                                                                                                                                                                                                                                                                                  | -0.40705                 | -0.91017 |
|                                                | C 4.90653                                                                                                                                                                                                                                                                                                                                                                                                                                                                                                                                                                                                                                                                                                                  | -0.24338                 | 0.28211  |
|                                                | N 3.55727                                                                                                                                                                                                                                                                                                                                                                                                                                                                                                                                                                                                                                                                                                                  | -0.27822                 | 0.20052  |
|                                                | H 2.18889                                                                                                                                                                                                                                                                                                                                                                                                                                                                                                                                                                                                                                                                                                                  | -0.53849                 | -1.43571 |
|                                                | H 7.10190                                                                                                                                                                                                                                                                                                                                                                                                                                                                                                                                                                                                                                                                                                                  | -0.41446                 | -1.00726 |
|                                                | H 2.88370                                                                                                                                                                                                                                                                                                                                                                                                                                                                                                                                                                                                                                                                                                                  | -0.19604                 | 0.97611  |
|                                                | H 5.46454                                                                                                                                                                                                                                                                                                                                                                                                                                                                                                                                                                                                                                                                                                                  | -0.10349                 | 1.19690  |
|                                                | C 10.17024                                                                                                                                                                                                                                                                                                                                                                                                                                                                                                                                                                                                                                                                                                                 | -0.28188                 | 0.12834  |
|                                                | H 10.52891                                                                                                                                                                                                                                                                                                                                                                                                                                                                                                                                                                                                                                                                                                                 | -1.22394                 | -0.30066 |
|                                                | H 10.53760                                                                                                                                                                                                                                                                                                                                                                                                                                                                                                                                                                                                                                                                                                                 | 0.52622                  | -0.51375 |
|                                                | H 10.56371                                                                                                                                                                                                                                                                                                                                                                                                                                                                                                                                                                                                                                                                                                                 | -0.16032                 | 1.13888  |
|                                                | C 4.65155                                                                                                                                                                                                                                                                                                                                                                                                                                                                                                                                                                                                                                                                                                                  | -0.76209                 | -3.26973 |
|                                                | H 5.20130                                                                                                                                                                                                                                                                                                                                                                                                                                                                                                                                                                                                                                                                                                                  | 0.07937                  | -3.71070 |
|                                                | H 5.24301                                                                                                                                                                                                                                                                                                                                                                                                                                                                                                                                                                                                                                                                                                                  | -1.66730                 | -3.45848 |
|                                                | H 3.70108                                                                                                                                                                                                                                                                                                                                                                                                                                                                                                                                                                                                                                                                                                                  | -0.86107                 | -3.80352 |
|                                                | C 0.43654                                                                                                                                                                                                                                                                                                                                                                                                                                                                                                                                                                                                                                                                                                                  | 0.49276                  | 2.41445  |
|                                                | C -1.60215                                                                                                                                                                                                                                                                                                                                                                                                                                                                                                                                                                                                                                                                                                                 | -0.41203                 | 1.24570  |
|                                                | O -2.29860                                                                                                                                                                                                                                                                                                                                                                                                                                                                                                                                                                                                                                                                                                                 | -0.71891                 | 0.21285  |
|                                                | C 1.34995                                                                                                                                                                                                                                                                                                                                                                                                                                                                                                                                                                                                                                                                                                                  | -1.75459                 | 2.33159  |
|                                                | H 0.86887                                                                                                                                                                                                                                                                                                                                                                                                                                                                                                                                                                                                                                                                                                                  | -2.04361                 | 3.27852  |
|                                                | H 0.68843                                                                                                                                                                                                                                                                                                                                                                                                                                                                                                                                                                                                                                                                                                                  | -2.03534                 | 1.50188  |

|   |          |          |          |
|---|----------|----------|----------|
| H | 2.29955  | -2.29095 | 2.23489  |
| C | -0.46998 | 0.37824  | 1.23471  |
| C | -0.07095 | 0.94012  | -0.11607 |
| C | -0.93504 | 2.11104  | -0.62219 |
| H | 0.95680  | 1.32066  | -0.04759 |
| O | 0.00160  | -0.07711 | -1.13651 |
| C | -0.98741 | 2.39596  | -1.99427 |
| C | -1.63424 | 2.95111  | 0.25284  |
| C | -1.71401 | 3.48525  | -2.47583 |
| H | -0.46145 | 1.73800  | -2.67844 |
| C | -2.36137 | 4.04465  | -0.22445 |
| H | -1.62082 | 2.72593  | 1.31494  |
| C | -2.40458 | 4.31790  | -1.59227 |
| H | -1.74532 | 3.68224  | -3.54564 |
| H | -2.89976 | 4.68080  | 0.47542  |
| H | -2.97446 | 5.16562  | -1.96611 |
| H | -0.85379 | -0.54702 | -1.02403 |
| O | -2.02243 | -0.89172 | 2.48841  |
| C | -2.88728 | -2.01805 | 2.46814  |
| H | -3.10192 | -2.24685 | 3.51607  |
| H | -2.40586 | -2.88914 | 2.00203  |
| H | -3.82359 | -1.81437 | 1.94038  |
| H | -0.09693 | 0.14171  | 3.30477  |
| C | 1.01198  | 1.87996  | 2.70182  |
| H | 1.55895  | 2.28001  | 1.84083  |
| H | 1.70463  | 1.83643  | 3.54982  |
| H | 0.20547  | 2.57998  | 2.94212  |
| C | -5.22242 | -2.22407 | -1.58789 |
| O | -5.90626 | -2.92524 | -2.33475 |
| C | -5.58753 | -0.74181 | -1.41560 |
| N | -5.04361 | -0.05108 | -0.26484 |
| H | -6.67498 | -0.68202 | -1.34786 |
| H | -5.29177 | -0.23877 | -2.34871 |
| H | -4.02966 | -0.03368 | -0.12514 |
| C | -5.84521 | 0.59965  | 0.62675  |
| O | -7.07224 | 0.63709  | 0.54374  |
| C | -5.08954 | 1.32397  | 1.73547  |
| H | -4.22496 | 0.75694  | 2.09485  |
| H | -4.71717 | 2.28352  | 1.35670  |
| H | -5.77932 | 1.51710  | 2.55986  |
| N | -4.12217 | -2.67067 | -0.92763 |
| H | -3.52118 | -2.01853 | -0.41932 |
| C | -3.63915 | -4.02529 | -1.10518 |
| H | -4.40230 | -4.58626 | -1.64724 |
| H | -2.70436 | -4.04818 | -1.68185 |
| H | -3.45483 | -4.50272 | -0.13478 |

Optimized Molecular Properties for **T2-TS4**

|                                                |                                                                                                                                                                                                                                                                                                                                                                                                                                                                                                                                                                                                                                                                                                                                                                                                                                                                                                                                                                                                                                                                                                                                                                                                                                                                                                                                                                                                                                                                                                                                                                                                                                                                                                                                                                                                                                                                                                                                                                                                                                      |          |          |          |         |   |         |          |          |   |         |          |         |   |         |         |          |   |         |          |          |   |         |          |          |   |         |          |          |   |         |          |         |   |         |          |         |   |         |          |          |   |         |          |          |   |         |          |         |   |         |          |         |   |          |         |          |   |          |          |          |   |          |         |          |   |          |          |         |   |         |         |          |   |         |         |          |   |         |          |          |   |         |         |          |   |         |         |         |   |          |          |         |   |          |          |         |   |         |          |         |   |         |          |         |   |         |          |         |
|------------------------------------------------|--------------------------------------------------------------------------------------------------------------------------------------------------------------------------------------------------------------------------------------------------------------------------------------------------------------------------------------------------------------------------------------------------------------------------------------------------------------------------------------------------------------------------------------------------------------------------------------------------------------------------------------------------------------------------------------------------------------------------------------------------------------------------------------------------------------------------------------------------------------------------------------------------------------------------------------------------------------------------------------------------------------------------------------------------------------------------------------------------------------------------------------------------------------------------------------------------------------------------------------------------------------------------------------------------------------------------------------------------------------------------------------------------------------------------------------------------------------------------------------------------------------------------------------------------------------------------------------------------------------------------------------------------------------------------------------------------------------------------------------------------------------------------------------------------------------------------------------------------------------------------------------------------------------------------------------------------------------------------------------------------------------------------------------|----------|----------|----------|---------|---|---------|----------|----------|---|---------|----------|---------|---|---------|---------|----------|---|---------|----------|----------|---|---------|----------|----------|---|---------|----------|----------|---|---------|----------|---------|---|---------|----------|---------|---|---------|----------|----------|---|---------|----------|----------|---|---------|----------|---------|---|---------|----------|---------|---|----------|---------|----------|---|----------|----------|----------|---|----------|---------|----------|---|----------|----------|---------|---|---------|---------|----------|---|---------|---------|----------|---|---------|----------|----------|---|---------|---------|----------|---|---------|---------|---------|---|----------|----------|---------|---|----------|----------|---------|---|---------|----------|---------|---|---------|----------|---------|---|---------|----------|---------|
| Number of<br>(-)<br>Vibrational<br>Frequencies | 1 (-834.7400)                                                                                                                                                                                                                                                                                                                                                                                                                                                                                                                                                                                                                                                                                                                                                                                                                                                                                                                                                                                                                                                                                                                                                                                                                                                                                                                                                                                                                                                                                                                                                                                                                                                                                                                                                                                                                                                                                                                                                                                                                        |          |          |          |         |   |         |          |          |   |         |          |         |   |         |         |          |   |         |          |          |   |         |          |          |   |         |          |          |   |         |          |         |   |         |          |         |   |         |          |          |   |         |          |          |   |         |          |         |   |         |          |         |   |          |         |          |   |          |          |          |   |          |         |          |   |          |          |         |   |         |         |          |   |         |         |          |   |         |          |          |   |         |         |          |   |         |         |         |   |          |          |         |   |          |          |         |   |         |          |         |   |         |          |         |   |         |          |         |
| Absolute<br>Energies<br>(Hartrees)             | <p><b>B3LYP/6-31G(d)</b></p> <p>There are 23 positive frequencies below 100 cm<sup>-1</sup>.</p> <p>Zero-point correction: 0.597277 hartree<br/>         Enthalpy correction: 0.642227 hartree<br/>         Free Energy correction: 0.507033 hartree<br/>         Quasiharmonic Free Energy correction: 0.527643 hartree</p> <p>SCF Energy: -1757.740064 hartree<br/>         SCF Energy + ZPVE: -1757.142787 hartree<br/>         Enthalpy: -1757.097837 hartree<br/>         Free Energy: -1757.233031 hartree</p> <p>Free Energy with quasiharmonic correction: -1757.212421 hartree<br/>         (correction: 12.93 kcal/mol)</p> <p><b>B3LYP-D3/6-311+G(d,p)</b></p> <p>SCF Done: E(RB3LYP) = -1758.37610812 A.U.</p>                                                                                                                                                                                                                                                                                                                                                                                                                                                                                                                                                                                                                                                                                                                                                                                                                                                                                                                                                                                                                                                                                                                                                                                                                                                                                                           |          |          |          |         |   |         |          |          |   |         |          |         |   |         |         |          |   |         |          |          |   |         |          |          |   |         |          |          |   |         |          |         |   |         |          |         |   |         |          |          |   |         |          |          |   |         |          |         |   |         |          |         |   |          |         |          |   |          |          |          |   |          |         |          |   |          |          |         |   |         |         |          |   |         |         |          |   |         |          |          |   |         |         |          |   |         |         |         |   |          |          |         |   |          |          |         |   |         |          |         |   |         |          |         |   |         |          |         |
| Cartesian<br>Coordinates                       | <p>73<br/>         spD3-TS4-T2.out Energy: -1103397.6579087</p> <table> <tr><td>O</td><td>2.03561</td><td>-1.28265</td><td>2.11037</td></tr> <tr><td>C</td><td>8.69411</td><td>-0.04580</td><td>-0.16527</td></tr> <tr><td>O</td><td>8.23118</td><td>-0.34168</td><td>0.92825</td></tr> <tr><td>O</td><td>8.00334</td><td>0.13920</td><td>-1.27421</td></tr> <tr><td>C</td><td>4.35996</td><td>-0.12609</td><td>-1.75303</td></tr> <tr><td>C</td><td>3.22627</td><td>-0.42176</td><td>-1.02593</td></tr> <tr><td>N</td><td>5.44788</td><td>-0.21087</td><td>-0.90914</td></tr> <tr><td>C</td><td>4.94850</td><td>-0.55010</td><td>0.28316</td></tr> <tr><td>N</td><td>3.61122</td><td>-0.69036</td><td>0.27063</td></tr> <tr><td>H</td><td>2.18762</td><td>-0.46979</td><td>-1.32888</td></tr> <tr><td>H</td><td>6.96026</td><td>-0.00477</td><td>-1.11151</td></tr> <tr><td>H</td><td>2.82849</td><td>-0.97903</td><td>1.22295</td></tr> <tr><td>H</td><td>5.56812</td><td>-0.69259</td><td>1.15850</td></tr> <tr><td>C</td><td>10.18918</td><td>0.15224</td><td>-0.38782</td></tr> <tr><td>H</td><td>10.55115</td><td>-0.55093</td><td>-1.14645</td></tr> <tr><td>H</td><td>10.38170</td><td>1.16229</td><td>-0.76675</td></tr> <tr><td>H</td><td>10.73081</td><td>-0.00195</td><td>0.54753</td></tr> <tr><td>C</td><td>4.49812</td><td>0.23208</td><td>-3.20081</td></tr> <tr><td>H</td><td>4.95797</td><td>1.22075</td><td>-3.33525</td></tr> <tr><td>H</td><td>5.12842</td><td>-0.48718</td><td>-3.74166</td></tr> <tr><td>H</td><td>3.51716</td><td>0.25024</td><td>-3.68842</td></tr> <tr><td>C</td><td>0.62414</td><td>0.38636</td><td>2.31240</td></tr> <tr><td>C</td><td>-1.53009</td><td>-0.49440</td><td>1.55002</td></tr> <tr><td>O</td><td>-2.39952</td><td>-0.70116</td><td>0.67756</td></tr> <tr><td>C</td><td>1.38509</td><td>-2.44014</td><td>1.69393</td></tr> <tr><td>H</td><td>1.08096</td><td>-3.06402</td><td>2.55262</td></tr> <tr><td>H</td><td>0.46965</td><td>-2.22310</td><td>1.10452</td></tr> </table> | O        | 2.03561  | -1.28265 | 2.11037 | C | 8.69411 | -0.04580 | -0.16527 | O | 8.23118 | -0.34168 | 0.92825 | O | 8.00334 | 0.13920 | -1.27421 | C | 4.35996 | -0.12609 | -1.75303 | C | 3.22627 | -0.42176 | -1.02593 | N | 5.44788 | -0.21087 | -0.90914 | C | 4.94850 | -0.55010 | 0.28316 | N | 3.61122 | -0.69036 | 0.27063 | H | 2.18762 | -0.46979 | -1.32888 | H | 6.96026 | -0.00477 | -1.11151 | H | 2.82849 | -0.97903 | 1.22295 | H | 5.56812 | -0.69259 | 1.15850 | C | 10.18918 | 0.15224 | -0.38782 | H | 10.55115 | -0.55093 | -1.14645 | H | 10.38170 | 1.16229 | -0.76675 | H | 10.73081 | -0.00195 | 0.54753 | C | 4.49812 | 0.23208 | -3.20081 | H | 4.95797 | 1.22075 | -3.33525 | H | 5.12842 | -0.48718 | -3.74166 | H | 3.51716 | 0.25024 | -3.68842 | C | 0.62414 | 0.38636 | 2.31240 | C | -1.53009 | -0.49440 | 1.55002 | O | -2.39952 | -0.70116 | 0.67756 | C | 1.38509 | -2.44014 | 1.69393 | H | 1.08096 | -3.06402 | 2.55262 | H | 0.46965 | -2.22310 | 1.10452 |
| O                                              | 2.03561                                                                                                                                                                                                                                                                                                                                                                                                                                                                                                                                                                                                                                                                                                                                                                                                                                                                                                                                                                                                                                                                                                                                                                                                                                                                                                                                                                                                                                                                                                                                                                                                                                                                                                                                                                                                                                                                                                                                                                                                                              | -1.28265 | 2.11037  |          |         |   |         |          |          |   |         |          |         |   |         |         |          |   |         |          |          |   |         |          |          |   |         |          |          |   |         |          |         |   |         |          |         |   |         |          |          |   |         |          |          |   |         |          |         |   |         |          |         |   |          |         |          |   |          |          |          |   |          |         |          |   |          |          |         |   |         |         |          |   |         |         |          |   |         |          |          |   |         |         |          |   |         |         |         |   |          |          |         |   |          |          |         |   |         |          |         |   |         |          |         |   |         |          |         |
| C                                              | 8.69411                                                                                                                                                                                                                                                                                                                                                                                                                                                                                                                                                                                                                                                                                                                                                                                                                                                                                                                                                                                                                                                                                                                                                                                                                                                                                                                                                                                                                                                                                                                                                                                                                                                                                                                                                                                                                                                                                                                                                                                                                              | -0.04580 | -0.16527 |          |         |   |         |          |          |   |         |          |         |   |         |         |          |   |         |          |          |   |         |          |          |   |         |          |          |   |         |          |         |   |         |          |         |   |         |          |          |   |         |          |          |   |         |          |         |   |         |          |         |   |          |         |          |   |          |          |          |   |          |         |          |   |          |          |         |   |         |         |          |   |         |         |          |   |         |          |          |   |         |         |          |   |         |         |         |   |          |          |         |   |          |          |         |   |         |          |         |   |         |          |         |   |         |          |         |
| O                                              | 8.23118                                                                                                                                                                                                                                                                                                                                                                                                                                                                                                                                                                                                                                                                                                                                                                                                                                                                                                                                                                                                                                                                                                                                                                                                                                                                                                                                                                                                                                                                                                                                                                                                                                                                                                                                                                                                                                                                                                                                                                                                                              | -0.34168 | 0.92825  |          |         |   |         |          |          |   |         |          |         |   |         |         |          |   |         |          |          |   |         |          |          |   |         |          |          |   |         |          |         |   |         |          |         |   |         |          |          |   |         |          |          |   |         |          |         |   |         |          |         |   |          |         |          |   |          |          |          |   |          |         |          |   |          |          |         |   |         |         |          |   |         |         |          |   |         |          |          |   |         |         |          |   |         |         |         |   |          |          |         |   |          |          |         |   |         |          |         |   |         |          |         |   |         |          |         |
| O                                              | 8.00334                                                                                                                                                                                                                                                                                                                                                                                                                                                                                                                                                                                                                                                                                                                                                                                                                                                                                                                                                                                                                                                                                                                                                                                                                                                                                                                                                                                                                                                                                                                                                                                                                                                                                                                                                                                                                                                                                                                                                                                                                              | 0.13920  | -1.27421 |          |         |   |         |          |          |   |         |          |         |   |         |         |          |   |         |          |          |   |         |          |          |   |         |          |          |   |         |          |         |   |         |          |         |   |         |          |          |   |         |          |          |   |         |          |         |   |         |          |         |   |          |         |          |   |          |          |          |   |          |         |          |   |          |          |         |   |         |         |          |   |         |         |          |   |         |          |          |   |         |         |          |   |         |         |         |   |          |          |         |   |          |          |         |   |         |          |         |   |         |          |         |   |         |          |         |
| C                                              | 4.35996                                                                                                                                                                                                                                                                                                                                                                                                                                                                                                                                                                                                                                                                                                                                                                                                                                                                                                                                                                                                                                                                                                                                                                                                                                                                                                                                                                                                                                                                                                                                                                                                                                                                                                                                                                                                                                                                                                                                                                                                                              | -0.12609 | -1.75303 |          |         |   |         |          |          |   |         |          |         |   |         |         |          |   |         |          |          |   |         |          |          |   |         |          |          |   |         |          |         |   |         |          |         |   |         |          |          |   |         |          |          |   |         |          |         |   |         |          |         |   |          |         |          |   |          |          |          |   |          |         |          |   |          |          |         |   |         |         |          |   |         |         |          |   |         |          |          |   |         |         |          |   |         |         |         |   |          |          |         |   |          |          |         |   |         |          |         |   |         |          |         |   |         |          |         |
| C                                              | 3.22627                                                                                                                                                                                                                                                                                                                                                                                                                                                                                                                                                                                                                                                                                                                                                                                                                                                                                                                                                                                                                                                                                                                                                                                                                                                                                                                                                                                                                                                                                                                                                                                                                                                                                                                                                                                                                                                                                                                                                                                                                              | -0.42176 | -1.02593 |          |         |   |         |          |          |   |         |          |         |   |         |         |          |   |         |          |          |   |         |          |          |   |         |          |          |   |         |          |         |   |         |          |         |   |         |          |          |   |         |          |          |   |         |          |         |   |         |          |         |   |          |         |          |   |          |          |          |   |          |         |          |   |          |          |         |   |         |         |          |   |         |         |          |   |         |          |          |   |         |         |          |   |         |         |         |   |          |          |         |   |          |          |         |   |         |          |         |   |         |          |         |   |         |          |         |
| N                                              | 5.44788                                                                                                                                                                                                                                                                                                                                                                                                                                                                                                                                                                                                                                                                                                                                                                                                                                                                                                                                                                                                                                                                                                                                                                                                                                                                                                                                                                                                                                                                                                                                                                                                                                                                                                                                                                                                                                                                                                                                                                                                                              | -0.21087 | -0.90914 |          |         |   |         |          |          |   |         |          |         |   |         |         |          |   |         |          |          |   |         |          |          |   |         |          |          |   |         |          |         |   |         |          |         |   |         |          |          |   |         |          |          |   |         |          |         |   |         |          |         |   |          |         |          |   |          |          |          |   |          |         |          |   |          |          |         |   |         |         |          |   |         |         |          |   |         |          |          |   |         |         |          |   |         |         |         |   |          |          |         |   |          |          |         |   |         |          |         |   |         |          |         |   |         |          |         |
| C                                              | 4.94850                                                                                                                                                                                                                                                                                                                                                                                                                                                                                                                                                                                                                                                                                                                                                                                                                                                                                                                                                                                                                                                                                                                                                                                                                                                                                                                                                                                                                                                                                                                                                                                                                                                                                                                                                                                                                                                                                                                                                                                                                              | -0.55010 | 0.28316  |          |         |   |         |          |          |   |         |          |         |   |         |         |          |   |         |          |          |   |         |          |          |   |         |          |          |   |         |          |         |   |         |          |         |   |         |          |          |   |         |          |          |   |         |          |         |   |         |          |         |   |          |         |          |   |          |          |          |   |          |         |          |   |          |          |         |   |         |         |          |   |         |         |          |   |         |          |          |   |         |         |          |   |         |         |         |   |          |          |         |   |          |          |         |   |         |          |         |   |         |          |         |   |         |          |         |
| N                                              | 3.61122                                                                                                                                                                                                                                                                                                                                                                                                                                                                                                                                                                                                                                                                                                                                                                                                                                                                                                                                                                                                                                                                                                                                                                                                                                                                                                                                                                                                                                                                                                                                                                                                                                                                                                                                                                                                                                                                                                                                                                                                                              | -0.69036 | 0.27063  |          |         |   |         |          |          |   |         |          |         |   |         |         |          |   |         |          |          |   |         |          |          |   |         |          |          |   |         |          |         |   |         |          |         |   |         |          |          |   |         |          |          |   |         |          |         |   |         |          |         |   |          |         |          |   |          |          |          |   |          |         |          |   |          |          |         |   |         |         |          |   |         |         |          |   |         |          |          |   |         |         |          |   |         |         |         |   |          |          |         |   |          |          |         |   |         |          |         |   |         |          |         |   |         |          |         |
| H                                              | 2.18762                                                                                                                                                                                                                                                                                                                                                                                                                                                                                                                                                                                                                                                                                                                                                                                                                                                                                                                                                                                                                                                                                                                                                                                                                                                                                                                                                                                                                                                                                                                                                                                                                                                                                                                                                                                                                                                                                                                                                                                                                              | -0.46979 | -1.32888 |          |         |   |         |          |          |   |         |          |         |   |         |         |          |   |         |          |          |   |         |          |          |   |         |          |          |   |         |          |         |   |         |          |         |   |         |          |          |   |         |          |          |   |         |          |         |   |         |          |         |   |          |         |          |   |          |          |          |   |          |         |          |   |          |          |         |   |         |         |          |   |         |         |          |   |         |          |          |   |         |         |          |   |         |         |         |   |          |          |         |   |          |          |         |   |         |          |         |   |         |          |         |   |         |          |         |
| H                                              | 6.96026                                                                                                                                                                                                                                                                                                                                                                                                                                                                                                                                                                                                                                                                                                                                                                                                                                                                                                                                                                                                                                                                                                                                                                                                                                                                                                                                                                                                                                                                                                                                                                                                                                                                                                                                                                                                                                                                                                                                                                                                                              | -0.00477 | -1.11151 |          |         |   |         |          |          |   |         |          |         |   |         |         |          |   |         |          |          |   |         |          |          |   |         |          |          |   |         |          |         |   |         |          |         |   |         |          |          |   |         |          |          |   |         |          |         |   |         |          |         |   |          |         |          |   |          |          |          |   |          |         |          |   |          |          |         |   |         |         |          |   |         |         |          |   |         |          |          |   |         |         |          |   |         |         |         |   |          |          |         |   |          |          |         |   |         |          |         |   |         |          |         |   |         |          |         |
| H                                              | 2.82849                                                                                                                                                                                                                                                                                                                                                                                                                                                                                                                                                                                                                                                                                                                                                                                                                                                                                                                                                                                                                                                                                                                                                                                                                                                                                                                                                                                                                                                                                                                                                                                                                                                                                                                                                                                                                                                                                                                                                                                                                              | -0.97903 | 1.22295  |          |         |   |         |          |          |   |         |          |         |   |         |         |          |   |         |          |          |   |         |          |          |   |         |          |          |   |         |          |         |   |         |          |         |   |         |          |          |   |         |          |          |   |         |          |         |   |         |          |         |   |          |         |          |   |          |          |          |   |          |         |          |   |          |          |         |   |         |         |          |   |         |         |          |   |         |          |          |   |         |         |          |   |         |         |         |   |          |          |         |   |          |          |         |   |         |          |         |   |         |          |         |   |         |          |         |
| H                                              | 5.56812                                                                                                                                                                                                                                                                                                                                                                                                                                                                                                                                                                                                                                                                                                                                                                                                                                                                                                                                                                                                                                                                                                                                                                                                                                                                                                                                                                                                                                                                                                                                                                                                                                                                                                                                                                                                                                                                                                                                                                                                                              | -0.69259 | 1.15850  |          |         |   |         |          |          |   |         |          |         |   |         |         |          |   |         |          |          |   |         |          |          |   |         |          |          |   |         |          |         |   |         |          |         |   |         |          |          |   |         |          |          |   |         |          |         |   |         |          |         |   |          |         |          |   |          |          |          |   |          |         |          |   |          |          |         |   |         |         |          |   |         |         |          |   |         |          |          |   |         |         |          |   |         |         |         |   |          |          |         |   |          |          |         |   |         |          |         |   |         |          |         |   |         |          |         |
| C                                              | 10.18918                                                                                                                                                                                                                                                                                                                                                                                                                                                                                                                                                                                                                                                                                                                                                                                                                                                                                                                                                                                                                                                                                                                                                                                                                                                                                                                                                                                                                                                                                                                                                                                                                                                                                                                                                                                                                                                                                                                                                                                                                             | 0.15224  | -0.38782 |          |         |   |         |          |          |   |         |          |         |   |         |         |          |   |         |          |          |   |         |          |          |   |         |          |          |   |         |          |         |   |         |          |         |   |         |          |          |   |         |          |          |   |         |          |         |   |         |          |         |   |          |         |          |   |          |          |          |   |          |         |          |   |          |          |         |   |         |         |          |   |         |         |          |   |         |          |          |   |         |         |          |   |         |         |         |   |          |          |         |   |          |          |         |   |         |          |         |   |         |          |         |   |         |          |         |
| H                                              | 10.55115                                                                                                                                                                                                                                                                                                                                                                                                                                                                                                                                                                                                                                                                                                                                                                                                                                                                                                                                                                                                                                                                                                                                                                                                                                                                                                                                                                                                                                                                                                                                                                                                                                                                                                                                                                                                                                                                                                                                                                                                                             | -0.55093 | -1.14645 |          |         |   |         |          |          |   |         |          |         |   |         |         |          |   |         |          |          |   |         |          |          |   |         |          |          |   |         |          |         |   |         |          |         |   |         |          |          |   |         |          |          |   |         |          |         |   |         |          |         |   |          |         |          |   |          |          |          |   |          |         |          |   |          |          |         |   |         |         |          |   |         |         |          |   |         |          |          |   |         |         |          |   |         |         |         |   |          |          |         |   |          |          |         |   |         |          |         |   |         |          |         |   |         |          |         |
| H                                              | 10.38170                                                                                                                                                                                                                                                                                                                                                                                                                                                                                                                                                                                                                                                                                                                                                                                                                                                                                                                                                                                                                                                                                                                                                                                                                                                                                                                                                                                                                                                                                                                                                                                                                                                                                                                                                                                                                                                                                                                                                                                                                             | 1.16229  | -0.76675 |          |         |   |         |          |          |   |         |          |         |   |         |         |          |   |         |          |          |   |         |          |          |   |         |          |          |   |         |          |         |   |         |          |         |   |         |          |          |   |         |          |          |   |         |          |         |   |         |          |         |   |          |         |          |   |          |          |          |   |          |         |          |   |          |          |         |   |         |         |          |   |         |         |          |   |         |          |          |   |         |         |          |   |         |         |         |   |          |          |         |   |          |          |         |   |         |          |         |   |         |          |         |   |         |          |         |
| H                                              | 10.73081                                                                                                                                                                                                                                                                                                                                                                                                                                                                                                                                                                                                                                                                                                                                                                                                                                                                                                                                                                                                                                                                                                                                                                                                                                                                                                                                                                                                                                                                                                                                                                                                                                                                                                                                                                                                                                                                                                                                                                                                                             | -0.00195 | 0.54753  |          |         |   |         |          |          |   |         |          |         |   |         |         |          |   |         |          |          |   |         |          |          |   |         |          |          |   |         |          |         |   |         |          |         |   |         |          |          |   |         |          |          |   |         |          |         |   |         |          |         |   |          |         |          |   |          |          |          |   |          |         |          |   |          |          |         |   |         |         |          |   |         |         |          |   |         |          |          |   |         |         |          |   |         |         |         |   |          |          |         |   |          |          |         |   |         |          |         |   |         |          |         |   |         |          |         |
| C                                              | 4.49812                                                                                                                                                                                                                                                                                                                                                                                                                                                                                                                                                                                                                                                                                                                                                                                                                                                                                                                                                                                                                                                                                                                                                                                                                                                                                                                                                                                                                                                                                                                                                                                                                                                                                                                                                                                                                                                                                                                                                                                                                              | 0.23208  | -3.20081 |          |         |   |         |          |          |   |         |          |         |   |         |         |          |   |         |          |          |   |         |          |          |   |         |          |          |   |         |          |         |   |         |          |         |   |         |          |          |   |         |          |          |   |         |          |         |   |         |          |         |   |          |         |          |   |          |          |          |   |          |         |          |   |          |          |         |   |         |         |          |   |         |         |          |   |         |          |          |   |         |         |          |   |         |         |         |   |          |          |         |   |          |          |         |   |         |          |         |   |         |          |         |   |         |          |         |
| H                                              | 4.95797                                                                                                                                                                                                                                                                                                                                                                                                                                                                                                                                                                                                                                                                                                                                                                                                                                                                                                                                                                                                                                                                                                                                                                                                                                                                                                                                                                                                                                                                                                                                                                                                                                                                                                                                                                                                                                                                                                                                                                                                                              | 1.22075  | -3.33525 |          |         |   |         |          |          |   |         |          |         |   |         |         |          |   |         |          |          |   |         |          |          |   |         |          |          |   |         |          |         |   |         |          |         |   |         |          |          |   |         |          |          |   |         |          |         |   |         |          |         |   |          |         |          |   |          |          |          |   |          |         |          |   |          |          |         |   |         |         |          |   |         |         |          |   |         |          |          |   |         |         |          |   |         |         |         |   |          |          |         |   |          |          |         |   |         |          |         |   |         |          |         |   |         |          |         |
| H                                              | 5.12842                                                                                                                                                                                                                                                                                                                                                                                                                                                                                                                                                                                                                                                                                                                                                                                                                                                                                                                                                                                                                                                                                                                                                                                                                                                                                                                                                                                                                                                                                                                                                                                                                                                                                                                                                                                                                                                                                                                                                                                                                              | -0.48718 | -3.74166 |          |         |   |         |          |          |   |         |          |         |   |         |         |          |   |         |          |          |   |         |          |          |   |         |          |          |   |         |          |         |   |         |          |         |   |         |          |          |   |         |          |          |   |         |          |         |   |         |          |         |   |          |         |          |   |          |          |          |   |          |         |          |   |          |          |         |   |         |         |          |   |         |         |          |   |         |          |          |   |         |         |          |   |         |         |         |   |          |          |         |   |          |          |         |   |         |          |         |   |         |          |         |   |         |          |         |
| H                                              | 3.51716                                                                                                                                                                                                                                                                                                                                                                                                                                                                                                                                                                                                                                                                                                                                                                                                                                                                                                                                                                                                                                                                                                                                                                                                                                                                                                                                                                                                                                                                                                                                                                                                                                                                                                                                                                                                                                                                                                                                                                                                                              | 0.25024  | -3.68842 |          |         |   |         |          |          |   |         |          |         |   |         |         |          |   |         |          |          |   |         |          |          |   |         |          |          |   |         |          |         |   |         |          |         |   |         |          |          |   |         |          |          |   |         |          |         |   |         |          |         |   |          |         |          |   |          |          |          |   |          |         |          |   |          |          |         |   |         |         |          |   |         |         |          |   |         |          |          |   |         |         |          |   |         |         |         |   |          |          |         |   |          |          |         |   |         |          |         |   |         |          |         |   |         |          |         |
| C                                              | 0.62414                                                                                                                                                                                                                                                                                                                                                                                                                                                                                                                                                                                                                                                                                                                                                                                                                                                                                                                                                                                                                                                                                                                                                                                                                                                                                                                                                                                                                                                                                                                                                                                                                                                                                                                                                                                                                                                                                                                                                                                                                              | 0.38636  | 2.31240  |          |         |   |         |          |          |   |         |          |         |   |         |         |          |   |         |          |          |   |         |          |          |   |         |          |          |   |         |          |         |   |         |          |         |   |         |          |          |   |         |          |          |   |         |          |         |   |         |          |         |   |          |         |          |   |          |          |          |   |          |         |          |   |          |          |         |   |         |         |          |   |         |         |          |   |         |          |          |   |         |         |          |   |         |         |         |   |          |          |         |   |          |          |         |   |         |          |         |   |         |          |         |   |         |          |         |
| C                                              | -1.53009                                                                                                                                                                                                                                                                                                                                                                                                                                                                                                                                                                                                                                                                                                                                                                                                                                                                                                                                                                                                                                                                                                                                                                                                                                                                                                                                                                                                                                                                                                                                                                                                                                                                                                                                                                                                                                                                                                                                                                                                                             | -0.49440 | 1.55002  |          |         |   |         |          |          |   |         |          |         |   |         |         |          |   |         |          |          |   |         |          |          |   |         |          |          |   |         |          |         |   |         |          |         |   |         |          |          |   |         |          |          |   |         |          |         |   |         |          |         |   |          |         |          |   |          |          |          |   |          |         |          |   |          |          |         |   |         |         |          |   |         |         |          |   |         |          |          |   |         |         |          |   |         |         |         |   |          |          |         |   |          |          |         |   |         |          |         |   |         |          |         |   |         |          |         |
| O                                              | -2.39952                                                                                                                                                                                                                                                                                                                                                                                                                                                                                                                                                                                                                                                                                                                                                                                                                                                                                                                                                                                                                                                                                                                                                                                                                                                                                                                                                                                                                                                                                                                                                                                                                                                                                                                                                                                                                                                                                                                                                                                                                             | -0.70116 | 0.67756  |          |         |   |         |          |          |   |         |          |         |   |         |         |          |   |         |          |          |   |         |          |          |   |         |          |          |   |         |          |         |   |         |          |         |   |         |          |          |   |         |          |          |   |         |          |         |   |         |          |         |   |          |         |          |   |          |          |          |   |          |         |          |   |          |          |         |   |         |         |          |   |         |         |          |   |         |          |          |   |         |         |          |   |         |         |         |   |          |          |         |   |          |          |         |   |         |          |         |   |         |          |         |   |         |          |         |
| C                                              | 1.38509                                                                                                                                                                                                                                                                                                                                                                                                                                                                                                                                                                                                                                                                                                                                                                                                                                                                                                                                                                                                                                                                                                                                                                                                                                                                                                                                                                                                                                                                                                                                                                                                                                                                                                                                                                                                                                                                                                                                                                                                                              | -2.44014 | 1.69393  |          |         |   |         |          |          |   |         |          |         |   |         |         |          |   |         |          |          |   |         |          |          |   |         |          |          |   |         |          |         |   |         |          |         |   |         |          |          |   |         |          |          |   |         |          |         |   |         |          |         |   |          |         |          |   |          |          |          |   |          |         |          |   |          |          |         |   |         |         |          |   |         |         |          |   |         |          |          |   |         |         |          |   |         |         |         |   |          |          |         |   |          |          |         |   |         |          |         |   |         |          |         |   |         |          |         |
| H                                              | 1.08096                                                                                                                                                                                                                                                                                                                                                                                                                                                                                                                                                                                                                                                                                                                                                                                                                                                                                                                                                                                                                                                                                                                                                                                                                                                                                                                                                                                                                                                                                                                                                                                                                                                                                                                                                                                                                                                                                                                                                                                                                              | -3.06402 | 2.55262  |          |         |   |         |          |          |   |         |          |         |   |         |         |          |   |         |          |          |   |         |          |          |   |         |          |          |   |         |          |         |   |         |          |         |   |         |          |          |   |         |          |          |   |         |          |         |   |         |          |         |   |          |         |          |   |          |          |          |   |          |         |          |   |          |          |         |   |         |         |          |   |         |         |          |   |         |          |          |   |         |         |          |   |         |         |         |   |          |          |         |   |          |          |         |   |         |          |         |   |         |          |         |   |         |          |         |
| H                                              | 0.46965                                                                                                                                                                                                                                                                                                                                                                                                                                                                                                                                                                                                                                                                                                                                                                                                                                                                                                                                                                                                                                                                                                                                                                                                                                                                                                                                                                                                                                                                                                                                                                                                                                                                                                                                                                                                                                                                                                                                                                                                                              | -2.22310 | 1.10452  |          |         |   |         |          |          |   |         |          |         |   |         |         |          |   |         |          |          |   |         |          |          |   |         |          |          |   |         |          |         |   |         |          |         |   |         |          |          |   |         |          |          |   |         |          |         |   |         |          |         |   |          |         |          |   |          |          |          |   |          |         |          |   |          |          |         |   |         |         |          |   |         |         |          |   |         |          |          |   |         |         |          |   |         |         |         |   |          |          |         |   |          |          |         |   |         |          |         |   |         |          |         |   |         |          |         |

|   |          |          |          |
|---|----------|----------|----------|
| H | 2.03134  | -3.05612 | 1.04388  |
| C | -0.35406 | 0.31642  | 1.34504  |
| C | -0.25498 | 0.97236  | -0.02551 |
| C | -1.24926 | 2.12890  | -0.21946 |
| H | 0.75150  | 1.38816  | -0.13296 |
| O | -0.35414 | 0.02355  | -1.09149 |
| C | -1.82433 | 2.36262  | -1.47539 |
| C | -1.55562 | 3.00925  | 0.82731  |
| C | -2.69145 | 3.43850  | -1.67729 |
| H | -1.57879 | 1.68825  | -2.28919 |
| C | -2.41484 | 4.09084  | 0.62630  |
| H | -1.12379 | 2.83698  | 1.80936  |
| C | -2.99058 | 4.30900  | -0.62747 |
| H | -3.13241 | 3.59773  | -2.65870 |
| H | -2.63844 | 4.76184  | 1.45282  |
| H | -3.66296 | 5.14907  | -0.78440 |
| H | -1.15600 | -0.49283 | -0.88702 |
| O | -1.67036 | -1.02931 | 2.79169  |
| C | -2.77521 | -1.91176 | 2.98317  |
| H | -2.71741 | -2.22735 | 4.02648  |
| H | -2.69987 | -2.78451 | 2.32628  |
| H | -3.72756 | -1.40717 | 2.79481  |
| H | 0.39116  | -0.07629 | 3.26310  |
| C | 1.74891  | 1.38058  | 2.35578  |
| H | 2.17501  | 1.58965  | 1.37198  |
| H | 2.55013  | 1.00171  | 2.99334  |
| H | 1.38907  | 2.33003  | 2.78043  |
| C | -4.88594 | -2.18678 | -1.91867 |
| O | -5.24236 | -2.90845 | -2.84793 |
| C | -5.33530 | -0.71741 | -1.89989 |
| N | -4.97521 | 0.07329  | -0.74181 |
| H | -6.42563 | -0.70975 | -1.96358 |
| H | -4.94914 | -0.26165 | -2.82078 |
| H | -3.99788 | 0.26187  | -0.54861 |
| C | -5.91740 | 0.57753  | 0.11482  |
| O | -7.12282 | 0.39636  | -0.03064 |
| C | -5.35193 | 1.41955  | 1.24882  |
| H | -4.37942 | 1.05268  | 1.58922  |
| H | -5.21254 | 2.45173  | 0.90671  |
| H | -6.06614 | 1.42013  | 2.07499  |
| N | -4.09113 | -2.59404 | -0.89652 |
| H | -3.77695 | -1.92237 | -0.20377 |
| C | -3.54206 | -3.93472 | -0.84261 |
| H | -3.78991 | -4.43679 | -1.77947 |
| H | -2.45322 | -3.89966 | -0.72274 |
| H | -3.96668 | -4.51173 | -0.00990 |

Optimized Molecular Properties for **T2-product**

|                                                |                                                                                                                                                                                                                                                                                                                                                                                                                                                                                                                                                                                                                                                                                                                            |                          |                   |
|------------------------------------------------|----------------------------------------------------------------------------------------------------------------------------------------------------------------------------------------------------------------------------------------------------------------------------------------------------------------------------------------------------------------------------------------------------------------------------------------------------------------------------------------------------------------------------------------------------------------------------------------------------------------------------------------------------------------------------------------------------------------------------|--------------------------|-------------------|
| Number of<br>(-)<br>Vibrational<br>Frequencies | 0                                                                                                                                                                                                                                                                                                                                                                                                                                                                                                                                                                                                                                                                                                                          |                          |                   |
| Absolute<br>Energies<br>(Hartrees)             | <p><b>B3LYP/6-31G(d)</b></p> <p>There are 25 positive frequencies below 100 cm<sup>-1</sup>.</p> <p>Zero-point correction: 0.602455 hartree<br/>         Enthalpy correction: 0.648494 hartree<br/>         Free Energy correction: 0.508452 hartree<br/>         Quasiharmonic Free Energy correction: 0.531358 hartree</p> <p>SCF Energy: -1757.756538 hartree<br/>         SCF Energy + ZPVE: -1757.154083 hartree<br/>         Enthalpy: -1757.108044 hartree<br/>         Free Energy: -1757.248086 hartree</p> <p>Free Energy with quasiharmonic correction: -1757.225180 hartree<br/>         (correction: 14.37 kcal/mol)</p> <p><b>B3LYP-D3/6-311+G(d,p)</b></p> <p>SCF Done: E(RB3LYP) = -1758.39277927 A.U.</p> |                          |                   |
| Cartesian<br>Coordinates                       | 73<br>spD3-product-T2.out                                                                                                                                                                                                                                                                                                                                                                                                                                                                                                                                                                                                                                                                                                  | Energy: -1103408.1192132 |                   |
|                                                | O                                                                                                                                                                                                                                                                                                                                                                                                                                                                                                                                                                                                                                                                                                                          | -2.59035                 | -1.29475 -2.17315 |
|                                                | C                                                                                                                                                                                                                                                                                                                                                                                                                                                                                                                                                                                                                                                                                                                          | -9.02705                 | 1.39607 -0.13070  |
|                                                | O                                                                                                                                                                                                                                                                                                                                                                                                                                                                                                                                                                                                                                                                                                                          | -8.20103                 | 1.56662 -1.05021  |
|                                                | O                                                                                                                                                                                                                                                                                                                                                                                                                                                                                                                                                                                                                                                                                                                          | -8.91065                 | 0.62550 0.88386   |
|                                                | C                                                                                                                                                                                                                                                                                                                                                                                                                                                                                                                                                                                                                                                                                                                          | -5.93715                 | -1.46206 1.47713  |
|                                                | C                                                                                                                                                                                                                                                                                                                                                                                                                                                                                                                                                                                                                                                                                                                          | -4.72913                 | -1.73645 0.87499  |
|                                                | N                                                                                                                                                                                                                                                                                                                                                                                                                                                                                                                                                                                                                                                                                                                          | -6.55960                 | -0.54733 0.65813  |
|                                                | C                                                                                                                                                                                                                                                                                                                                                                                                                                                                                                                                                                                                                                                                                                                          | -5.73266                 | -0.30719 -0.37830 |
|                                                | N                                                                                                                                                                                                                                                                                                                                                                                                                                                                                                                                                                                                                                                                                                                          | -4.60222                 | -1.00851 -0.29191 |
|                                                | H                                                                                                                                                                                                                                                                                                                                                                                                                                                                                                                                                                                                                                                                                                                          | -3.94982                 | -2.41045 1.20973  |
|                                                | H                                                                                                                                                                                                                                                                                                                                                                                                                                                                                                                                                                                                                                                                                                                          | -7.53296                 | -0.07639 0.77485  |
|                                                | H                                                                                                                                                                                                                                                                                                                                                                                                                                                                                                                                                                                                                                                                                                                          | -3.32829                 | -1.16929 -1.50725 |
|                                                | H                                                                                                                                                                                                                                                                                                                                                                                                                                                                                                                                                                                                                                                                                                                          | -6.01514                 | 0.38557 -1.15853  |
|                                                | C                                                                                                                                                                                                                                                                                                                                                                                                                                                                                                                                                                                                                                                                                                                          | -10.35520                | 2.18322 -0.18153  |
|                                                | H                                                                                                                                                                                                                                                                                                                                                                                                                                                                                                                                                                                                                                                                                                                          | -11.20266                | 1.48617 -0.19565  |
|                                                | H                                                                                                                                                                                                                                                                                                                                                                                                                                                                                                                                                                                                                                                                                                                          | -10.46286                | 2.79451 0.72338   |
|                                                | H                                                                                                                                                                                                                                                                                                                                                                                                                                                                                                                                                                                                                                                                                                                          | -10.39853                | 2.82762 -1.06460  |
|                                                | C                                                                                                                                                                                                                                                                                                                                                                                                                                                                                                                                                                                                                                                                                                                          | -6.55565                 | -1.97278 2.73909  |
|                                                | H                                                                                                                                                                                                                                                                                                                                                                                                                                                                                                                                                                                                                                                                                                                          | -6.75484                 | -1.16366 3.45393  |
|                                                | H                                                                                                                                                                                                                                                                                                                                                                                                                                                                                                                                                                                                                                                                                                                          | -7.51426                 | -2.47373 2.55096  |
|                                                | H                                                                                                                                                                                                                                                                                                                                                                                                                                                                                                                                                                                                                                                                                                                          | -5.88780                 | -2.69340 3.22368  |
|                                                | C                                                                                                                                                                                                                                                                                                                                                                                                                                                                                                                                                                                                                                                                                                                          | -0.57754                 | 0.09069 -0.22930  |
|                                                | C                                                                                                                                                                                                                                                                                                                                                                                                                                                                                                                                                                                                                                                                                                                          | 1.54666                  | -0.98237 0.36110  |
|                                                | O                                                                                                                                                                                                                                                                                                                                                                                                                                                                                                                                                                                                                                                                                                                          | 2.58572                  | -1.02818 1.02753  |
|                                                | C                                                                                                                                                                                                                                                                                                                                                                                                                                                                                                                                                                                                                                                                                                                          | -2.96164                 | -2.35029 -3.02440 |
|                                                | H                                                                                                                                                                                                                                                                                                                                                                                                                                                                                                                                                                                                                                                                                                                          | -2.16373                 | -2.49119 -3.76496 |
|                                                | H                                                                                                                                                                                                                                                                                                                                                                                                                                                                                                                                                                                                                                                                                                                          | -3.09585                 | -3.30819 -2.49155 |



|   |          |          |          |
|---|----------|----------|----------|
| H | -3.89638 | -2.14705 | -3.57406 |
| C | 0.63544  | 0.18338  | 0.35848  |
| C | 1.17597  | 1.42170  | 1.07748  |
| C | 2.25771  | 2.13945  | 0.25343  |
| H | 0.34746  | 2.12450  | 1.20449  |
| O | 1.60928  | 1.12715  | 2.39942  |
| C | 3.48234  | 2.49231  | 0.82829  |
| C | 2.01694  | 2.49246  | -1.08244 |
| C | 4.45633  | 3.16254  | 0.08162  |
| H | 3.66141  | 2.24425  | 1.86817  |
| C | 2.98091  | 3.17258  | -1.82765 |
| H | 1.06995  | 2.22737  | -1.54526 |
| C | 4.21112  | 3.50394  | -1.25053 |
| H | 5.40326  | 3.42534  | 0.54738  |
| H | 2.77168  | 3.44368  | -2.85966 |
| H | 4.96325  | 4.03418  | -1.82954 |
| H | 2.17100  | 0.33398  | 2.30598  |
| O | 1.16351  | -2.01097 | -0.40902 |
| C | 1.96019  | -3.21065 | -0.32970 |
| H | 1.39894  | -3.95637 | -0.89311 |
| H | 2.07459  | -3.52056 | 0.71193  |
| H | 2.94558  | -3.05573 | -0.77664 |
| H | -0.84804 | -0.84173 | -0.72173 |
| C | -1.64630 | 1.12753  | -0.32332 |
| H | -1.40238 | 2.08480  | 0.14412  |
| H | -2.57284 | 0.73177  | 0.11371  |
| H | -1.88827 | 1.28785  | -1.38169 |
| C | 6.65258  | -0.40081 | 1.16572  |
| O | 7.69191  | -0.21746 | 1.79664  |
| C | 6.71336  | -0.52713 | -0.36389 |
| N | 5.50476  | -0.20763 | -1.09992 |
| H | 6.95995  | -1.56487 | -0.60951 |
| H | 7.54642  | 0.10436  | -0.69018 |
| H | 5.19048  | 0.75484  | -1.11493 |
| C | 4.83011  | -1.13675 | -1.84573 |
| O | 5.13488  | -2.32768 | -1.85313 |
| C | 3.67858  | -0.60126 | -2.68012 |
| H | 3.57021  | 0.48501  | -2.63449 |
| H | 3.84058  | -0.90668 | -3.71867 |
| H | 2.74100  | -1.05909 | -2.35080 |
| N | 5.42732  | -0.53962 | 1.72585  |
| H | 4.62206  | -0.73056 | 1.13983  |
| C | 5.22826  | -0.52207 | 3.16199  |
| H | 6.16301  | -0.20333 | 3.62598  |
| H | 4.42831  | 0.17652  | 3.43212  |
| H | 4.96244  | -1.51681 | 3.54171  |

Optimized Molecular Properties for **T3-TS2**

|                                                |                                                                                                                                                                                                                                                                                                                                                                                                                                                                                                                                                                                                                                                                                                                                                                                                                                                                                                                                                                                                                                                                                                                                                                                                                                                                                                                                                                                                                                                                                                                                                                                                                                                                                                                                                                                                                                                                                                                                                                                                                                                 |          |          |          |          |   |          |         |          |   |          |         |          |   |          |         |          |   |          |          |          |   |          |          |          |   |          |          |          |   |          |          |          |   |          |          |          |   |          |         |          |   |          |          |          |   |          |          |         |   |         |          |          |   |         |         |          |   |          |          |          |   |         |          |          |   |         |          |         |   |         |          |         |   |         |          |         |   |         |         |         |   |         |          |         |   |         |         |         |   |          |          |         |   |         |         |         |   |         |          |          |   |          |         |          |   |          |         |          |
|------------------------------------------------|-------------------------------------------------------------------------------------------------------------------------------------------------------------------------------------------------------------------------------------------------------------------------------------------------------------------------------------------------------------------------------------------------------------------------------------------------------------------------------------------------------------------------------------------------------------------------------------------------------------------------------------------------------------------------------------------------------------------------------------------------------------------------------------------------------------------------------------------------------------------------------------------------------------------------------------------------------------------------------------------------------------------------------------------------------------------------------------------------------------------------------------------------------------------------------------------------------------------------------------------------------------------------------------------------------------------------------------------------------------------------------------------------------------------------------------------------------------------------------------------------------------------------------------------------------------------------------------------------------------------------------------------------------------------------------------------------------------------------------------------------------------------------------------------------------------------------------------------------------------------------------------------------------------------------------------------------------------------------------------------------------------------------------------------------|----------|----------|----------|----------|---|----------|---------|----------|---|----------|---------|----------|---|----------|---------|----------|---|----------|----------|----------|---|----------|----------|----------|---|----------|----------|----------|---|----------|----------|----------|---|----------|----------|----------|---|----------|---------|----------|---|----------|----------|----------|---|----------|----------|---------|---|---------|----------|----------|---|---------|---------|----------|---|----------|----------|----------|---|---------|----------|----------|---|---------|----------|---------|---|---------|----------|---------|---|---------|----------|---------|---|---------|---------|---------|---|---------|----------|---------|---|---------|---------|---------|---|----------|----------|---------|---|---------|---------|---------|---|---------|----------|----------|---|----------|---------|----------|---|----------|---------|----------|
| Number of<br>(-)<br>Vibrational<br>Frequencies | 1 (-55.3448)                                                                                                                                                                                                                                                                                                                                                                                                                                                                                                                                                                                                                                                                                                                                                                                                                                                                                                                                                                                                                                                                                                                                                                                                                                                                                                                                                                                                                                                                                                                                                                                                                                                                                                                                                                                                                                                                                                                                                                                                                                    |          |          |          |          |   |          |         |          |   |          |         |          |   |          |         |          |   |          |          |          |   |          |          |          |   |          |          |          |   |          |          |          |   |          |          |          |   |          |         |          |   |          |          |          |   |          |          |         |   |         |          |          |   |         |         |          |   |          |          |          |   |         |          |          |   |         |          |         |   |         |          |         |   |         |          |         |   |         |         |         |   |         |          |         |   |         |         |         |   |          |          |         |   |         |         |         |   |         |          |          |   |          |         |          |   |          |         |          |
| Absolute<br>Energies<br>(Hartrees)             | <p><b>B3LYP/6-31G(d)</b></p> <p>There are 24 positive frequencies below 100 cm<sup>-1</sup>.</p> <p>Zero-point correction: 0.627886 hartree<br/>         Enthalpy correction: 0.675061 hartree<br/>         Free Energy correction: 0.535388 hartree<br/>         Quasiharmonic Free Energy correction: 0.556078 hartree</p> <p>SCF Energy: -1834.180059 hartree<br/>         SCF Energy + ZPVE: -1833.552173 hartree<br/>         Enthalpy: -1833.504998 hartree<br/>         Free Energy: -1833.644671 hartree</p> <p>Free Energy with quasiharmonic correction: -1833.623981 hartree<br/>         (correction: 12.98 kcal/mol)</p> <p><b>B3LYP-D3/6-311+G(d,p)</b></p> <p>SCF Done: E(RB3LYP) = -1834.86010943 A.U.</p>                                                                                                                                                                                                                                                                                                                                                                                                                                                                                                                                                                                                                                                                                                                                                                                                                                                                                                                                                                                                                                                                                                                                                                                                                                                                                                                      |          |          |          |          |   |          |         |          |   |          |         |          |   |          |         |          |   |          |          |          |   |          |          |          |   |          |          |          |   |          |          |          |   |          |          |          |   |          |         |          |   |          |          |          |   |          |          |         |   |         |          |          |   |         |         |          |   |          |          |          |   |         |          |          |   |         |          |         |   |         |          |         |   |         |          |         |   |         |         |         |   |         |          |         |   |         |         |         |   |          |          |         |   |         |         |         |   |         |          |          |   |          |         |          |   |          |         |          |
| Cartesian<br>Coordinates                       | <p>76<br/>         spD3-TS2-T3.out Energy: -1151392.0929577</p> <table> <tr><td>O</td><td>-1.34441</td><td>-2.89847</td><td>-0.76038</td></tr> <tr><td>C</td><td>-5.89135</td><td>3.06922</td><td>-0.77378</td></tr> <tr><td>O</td><td>-4.69076</td><td>2.88101</td><td>-0.89143</td></tr> <tr><td>O</td><td>-6.80347</td><td>2.11397</td><td>-0.62222</td></tr> <tr><td>C</td><td>-5.92364</td><td>-1.60329</td><td>-0.35547</td></tr> <tr><td>C</td><td>-4.78604</td><td>-2.37413</td><td>-0.37969</td></tr> <tr><td>N</td><td>-5.57042</td><td>-0.28386</td><td>-0.56734</td></tr> <tr><td>C</td><td>-4.25249</td><td>-0.27033</td><td>-0.71274</td></tr> <tr><td>N</td><td>-3.73543</td><td>-1.51254</td><td>-0.60780</td></tr> <tr><td>C</td><td>-6.51862</td><td>4.45169</td><td>-0.78558</td></tr> <tr><td>C</td><td>-7.34585</td><td>-2.01824</td><td>-0.14264</td></tr> <tr><td>C</td><td>-0.30892</td><td>-2.74110</td><td>0.30181</td></tr> <tr><td>C</td><td>0.65512</td><td>-0.48574</td><td>-0.38789</td></tr> <tr><td>O</td><td>1.50164</td><td>0.27318</td><td>-0.89027</td></tr> <tr><td>C</td><td>-0.86738</td><td>-3.24052</td><td>-2.04883</td></tr> <tr><td>C</td><td>0.83552</td><td>-1.85789</td><td>-0.06022</td></tr> <tr><td>C</td><td>2.33812</td><td>-1.51109</td><td>1.76300</td></tr> <tr><td>C</td><td>1.56228</td><td>-0.53023</td><td>2.57010</td></tr> <tr><td>O</td><td>3.41927</td><td>-1.20268</td><td>1.21322</td></tr> <tr><td>C</td><td>1.90399</td><td>0.83003</td><td>2.54227</td></tr> <tr><td>C</td><td>0.52808</td><td>-0.95579</td><td>3.41620</td></tr> <tr><td>C</td><td>1.21213</td><td>1.74456</td><td>3.33447</td></tr> <tr><td>C</td><td>-0.16389</td><td>-0.04117</td><td>4.20780</td></tr> <tr><td>C</td><td>0.17521</td><td>1.31409</td><td>4.16772</td></tr> <tr><td>H</td><td>1.69444</td><td>-2.32123</td><td>-0.53494</td></tr> <tr><td>O</td><td>-0.58918</td><td>0.01061</td><td>-0.03272</td></tr> <tr><td>C</td><td>-0.76638</td><td>1.41466</td><td>-0.21225</td></tr> </table> | O        | -1.34441 | -2.89847 | -0.76038 | C | -5.89135 | 3.06922 | -0.77378 | O | -4.69076 | 2.88101 | -0.89143 | O | -6.80347 | 2.11397 | -0.62222 | C | -5.92364 | -1.60329 | -0.35547 | C | -4.78604 | -2.37413 | -0.37969 | N | -5.57042 | -0.28386 | -0.56734 | C | -4.25249 | -0.27033 | -0.71274 | N | -3.73543 | -1.51254 | -0.60780 | C | -6.51862 | 4.45169 | -0.78558 | C | -7.34585 | -2.01824 | -0.14264 | C | -0.30892 | -2.74110 | 0.30181 | C | 0.65512 | -0.48574 | -0.38789 | O | 1.50164 | 0.27318 | -0.89027 | C | -0.86738 | -3.24052 | -2.04883 | C | 0.83552 | -1.85789 | -0.06022 | C | 2.33812 | -1.51109 | 1.76300 | C | 1.56228 | -0.53023 | 2.57010 | O | 3.41927 | -1.20268 | 1.21322 | C | 1.90399 | 0.83003 | 2.54227 | C | 0.52808 | -0.95579 | 3.41620 | C | 1.21213 | 1.74456 | 3.33447 | C | -0.16389 | -0.04117 | 4.20780 | C | 0.17521 | 1.31409 | 4.16772 | H | 1.69444 | -2.32123 | -0.53494 | O | -0.58918 | 0.01061 | -0.03272 | C | -0.76638 | 1.41466 | -0.21225 |
| O                                              | -1.34441                                                                                                                                                                                                                                                                                                                                                                                                                                                                                                                                                                                                                                                                                                                                                                                                                                                                                                                                                                                                                                                                                                                                                                                                                                                                                                                                                                                                                                                                                                                                                                                                                                                                                                                                                                                                                                                                                                                                                                                                                                        | -2.89847 | -0.76038 |          |          |   |          |         |          |   |          |         |          |   |          |         |          |   |          |          |          |   |          |          |          |   |          |          |          |   |          |          |          |   |          |          |          |   |          |         |          |   |          |          |          |   |          |          |         |   |         |          |          |   |         |         |          |   |          |          |          |   |         |          |          |   |         |          |         |   |         |          |         |   |         |          |         |   |         |         |         |   |         |          |         |   |         |         |         |   |          |          |         |   |         |         |         |   |         |          |          |   |          |         |          |   |          |         |          |
| C                                              | -5.89135                                                                                                                                                                                                                                                                                                                                                                                                                                                                                                                                                                                                                                                                                                                                                                                                                                                                                                                                                                                                                                                                                                                                                                                                                                                                                                                                                                                                                                                                                                                                                                                                                                                                                                                                                                                                                                                                                                                                                                                                                                        | 3.06922  | -0.77378 |          |          |   |          |         |          |   |          |         |          |   |          |         |          |   |          |          |          |   |          |          |          |   |          |          |          |   |          |          |          |   |          |          |          |   |          |         |          |   |          |          |          |   |          |          |         |   |         |          |          |   |         |         |          |   |          |          |          |   |         |          |          |   |         |          |         |   |         |          |         |   |         |          |         |   |         |         |         |   |         |          |         |   |         |         |         |   |          |          |         |   |         |         |         |   |         |          |          |   |          |         |          |   |          |         |          |
| O                                              | -4.69076                                                                                                                                                                                                                                                                                                                                                                                                                                                                                                                                                                                                                                                                                                                                                                                                                                                                                                                                                                                                                                                                                                                                                                                                                                                                                                                                                                                                                                                                                                                                                                                                                                                                                                                                                                                                                                                                                                                                                                                                                                        | 2.88101  | -0.89143 |          |          |   |          |         |          |   |          |         |          |   |          |         |          |   |          |          |          |   |          |          |          |   |          |          |          |   |          |          |          |   |          |          |          |   |          |         |          |   |          |          |          |   |          |          |         |   |         |          |          |   |         |         |          |   |          |          |          |   |         |          |          |   |         |          |         |   |         |          |         |   |         |          |         |   |         |         |         |   |         |          |         |   |         |         |         |   |          |          |         |   |         |         |         |   |         |          |          |   |          |         |          |   |          |         |          |
| O                                              | -6.80347                                                                                                                                                                                                                                                                                                                                                                                                                                                                                                                                                                                                                                                                                                                                                                                                                                                                                                                                                                                                                                                                                                                                                                                                                                                                                                                                                                                                                                                                                                                                                                                                                                                                                                                                                                                                                                                                                                                                                                                                                                        | 2.11397  | -0.62222 |          |          |   |          |         |          |   |          |         |          |   |          |         |          |   |          |          |          |   |          |          |          |   |          |          |          |   |          |          |          |   |          |          |          |   |          |         |          |   |          |          |          |   |          |          |         |   |         |          |          |   |         |         |          |   |          |          |          |   |         |          |          |   |         |          |         |   |         |          |         |   |         |          |         |   |         |         |         |   |         |          |         |   |         |         |         |   |          |          |         |   |         |         |         |   |         |          |          |   |          |         |          |   |          |         |          |
| C                                              | -5.92364                                                                                                                                                                                                                                                                                                                                                                                                                                                                                                                                                                                                                                                                                                                                                                                                                                                                                                                                                                                                                                                                                                                                                                                                                                                                                                                                                                                                                                                                                                                                                                                                                                                                                                                                                                                                                                                                                                                                                                                                                                        | -1.60329 | -0.35547 |          |          |   |          |         |          |   |          |         |          |   |          |         |          |   |          |          |          |   |          |          |          |   |          |          |          |   |          |          |          |   |          |          |          |   |          |         |          |   |          |          |          |   |          |          |         |   |         |          |          |   |         |         |          |   |          |          |          |   |         |          |          |   |         |          |         |   |         |          |         |   |         |          |         |   |         |         |         |   |         |          |         |   |         |         |         |   |          |          |         |   |         |         |         |   |         |          |          |   |          |         |          |   |          |         |          |
| C                                              | -4.78604                                                                                                                                                                                                                                                                                                                                                                                                                                                                                                                                                                                                                                                                                                                                                                                                                                                                                                                                                                                                                                                                                                                                                                                                                                                                                                                                                                                                                                                                                                                                                                                                                                                                                                                                                                                                                                                                                                                                                                                                                                        | -2.37413 | -0.37969 |          |          |   |          |         |          |   |          |         |          |   |          |         |          |   |          |          |          |   |          |          |          |   |          |          |          |   |          |          |          |   |          |          |          |   |          |         |          |   |          |          |          |   |          |          |         |   |         |          |          |   |         |         |          |   |          |          |          |   |         |          |          |   |         |          |         |   |         |          |         |   |         |          |         |   |         |         |         |   |         |          |         |   |         |         |         |   |          |          |         |   |         |         |         |   |         |          |          |   |          |         |          |   |          |         |          |
| N                                              | -5.57042                                                                                                                                                                                                                                                                                                                                                                                                                                                                                                                                                                                                                                                                                                                                                                                                                                                                                                                                                                                                                                                                                                                                                                                                                                                                                                                                                                                                                                                                                                                                                                                                                                                                                                                                                                                                                                                                                                                                                                                                                                        | -0.28386 | -0.56734 |          |          |   |          |         |          |   |          |         |          |   |          |         |          |   |          |          |          |   |          |          |          |   |          |          |          |   |          |          |          |   |          |          |          |   |          |         |          |   |          |          |          |   |          |          |         |   |         |          |          |   |         |         |          |   |          |          |          |   |         |          |          |   |         |          |         |   |         |          |         |   |         |          |         |   |         |         |         |   |         |          |         |   |         |         |         |   |          |          |         |   |         |         |         |   |         |          |          |   |          |         |          |   |          |         |          |
| C                                              | -4.25249                                                                                                                                                                                                                                                                                                                                                                                                                                                                                                                                                                                                                                                                                                                                                                                                                                                                                                                                                                                                                                                                                                                                                                                                                                                                                                                                                                                                                                                                                                                                                                                                                                                                                                                                                                                                                                                                                                                                                                                                                                        | -0.27033 | -0.71274 |          |          |   |          |         |          |   |          |         |          |   |          |         |          |   |          |          |          |   |          |          |          |   |          |          |          |   |          |          |          |   |          |          |          |   |          |         |          |   |          |          |          |   |          |          |         |   |         |          |          |   |         |         |          |   |          |          |          |   |         |          |          |   |         |          |         |   |         |          |         |   |         |          |         |   |         |         |         |   |         |          |         |   |         |         |         |   |          |          |         |   |         |         |         |   |         |          |          |   |          |         |          |   |          |         |          |
| N                                              | -3.73543                                                                                                                                                                                                                                                                                                                                                                                                                                                                                                                                                                                                                                                                                                                                                                                                                                                                                                                                                                                                                                                                                                                                                                                                                                                                                                                                                                                                                                                                                                                                                                                                                                                                                                                                                                                                                                                                                                                                                                                                                                        | -1.51254 | -0.60780 |          |          |   |          |         |          |   |          |         |          |   |          |         |          |   |          |          |          |   |          |          |          |   |          |          |          |   |          |          |          |   |          |          |          |   |          |         |          |   |          |          |          |   |          |          |         |   |         |          |          |   |         |         |          |   |          |          |          |   |         |          |          |   |         |          |         |   |         |          |         |   |         |          |         |   |         |         |         |   |         |          |         |   |         |         |         |   |          |          |         |   |         |         |         |   |         |          |          |   |          |         |          |   |          |         |          |
| C                                              | -6.51862                                                                                                                                                                                                                                                                                                                                                                                                                                                                                                                                                                                                                                                                                                                                                                                                                                                                                                                                                                                                                                                                                                                                                                                                                                                                                                                                                                                                                                                                                                                                                                                                                                                                                                                                                                                                                                                                                                                                                                                                                                        | 4.45169  | -0.78558 |          |          |   |          |         |          |   |          |         |          |   |          |         |          |   |          |          |          |   |          |          |          |   |          |          |          |   |          |          |          |   |          |          |          |   |          |         |          |   |          |          |          |   |          |          |         |   |         |          |          |   |         |         |          |   |          |          |          |   |         |          |          |   |         |          |         |   |         |          |         |   |         |          |         |   |         |         |         |   |         |          |         |   |         |         |         |   |          |          |         |   |         |         |         |   |         |          |          |   |          |         |          |   |          |         |          |
| C                                              | -7.34585                                                                                                                                                                                                                                                                                                                                                                                                                                                                                                                                                                                                                                                                                                                                                                                                                                                                                                                                                                                                                                                                                                                                                                                                                                                                                                                                                                                                                                                                                                                                                                                                                                                                                                                                                                                                                                                                                                                                                                                                                                        | -2.01824 | -0.14264 |          |          |   |          |         |          |   |          |         |          |   |          |         |          |   |          |          |          |   |          |          |          |   |          |          |          |   |          |          |          |   |          |          |          |   |          |         |          |   |          |          |          |   |          |          |         |   |         |          |          |   |         |         |          |   |          |          |          |   |         |          |          |   |         |          |         |   |         |          |         |   |         |          |         |   |         |         |         |   |         |          |         |   |         |         |         |   |          |          |         |   |         |         |         |   |         |          |          |   |          |         |          |   |          |         |          |
| C                                              | -0.30892                                                                                                                                                                                                                                                                                                                                                                                                                                                                                                                                                                                                                                                                                                                                                                                                                                                                                                                                                                                                                                                                                                                                                                                                                                                                                                                                                                                                                                                                                                                                                                                                                                                                                                                                                                                                                                                                                                                                                                                                                                        | -2.74110 | 0.30181  |          |          |   |          |         |          |   |          |         |          |   |          |         |          |   |          |          |          |   |          |          |          |   |          |          |          |   |          |          |          |   |          |          |          |   |          |         |          |   |          |          |          |   |          |          |         |   |         |          |          |   |         |         |          |   |          |          |          |   |         |          |          |   |         |          |         |   |         |          |         |   |         |          |         |   |         |         |         |   |         |          |         |   |         |         |         |   |          |          |         |   |         |         |         |   |         |          |          |   |          |         |          |   |          |         |          |
| C                                              | 0.65512                                                                                                                                                                                                                                                                                                                                                                                                                                                                                                                                                                                                                                                                                                                                                                                                                                                                                                                                                                                                                                                                                                                                                                                                                                                                                                                                                                                                                                                                                                                                                                                                                                                                                                                                                                                                                                                                                                                                                                                                                                         | -0.48574 | -0.38789 |          |          |   |          |         |          |   |          |         |          |   |          |         |          |   |          |          |          |   |          |          |          |   |          |          |          |   |          |          |          |   |          |          |          |   |          |         |          |   |          |          |          |   |          |          |         |   |         |          |          |   |         |         |          |   |          |          |          |   |         |          |          |   |         |          |         |   |         |          |         |   |         |          |         |   |         |         |         |   |         |          |         |   |         |         |         |   |          |          |         |   |         |         |         |   |         |          |          |   |          |         |          |   |          |         |          |
| O                                              | 1.50164                                                                                                                                                                                                                                                                                                                                                                                                                                                                                                                                                                                                                                                                                                                                                                                                                                                                                                                                                                                                                                                                                                                                                                                                                                                                                                                                                                                                                                                                                                                                                                                                                                                                                                                                                                                                                                                                                                                                                                                                                                         | 0.27318  | -0.89027 |          |          |   |          |         |          |   |          |         |          |   |          |         |          |   |          |          |          |   |          |          |          |   |          |          |          |   |          |          |          |   |          |          |          |   |          |         |          |   |          |          |          |   |          |          |         |   |         |          |          |   |         |         |          |   |          |          |          |   |         |          |          |   |         |          |         |   |         |          |         |   |         |          |         |   |         |         |         |   |         |          |         |   |         |         |         |   |          |          |         |   |         |         |         |   |         |          |          |   |          |         |          |   |          |         |          |
| C                                              | -0.86738                                                                                                                                                                                                                                                                                                                                                                                                                                                                                                                                                                                                                                                                                                                                                                                                                                                                                                                                                                                                                                                                                                                                                                                                                                                                                                                                                                                                                                                                                                                                                                                                                                                                                                                                                                                                                                                                                                                                                                                                                                        | -3.24052 | -2.04883 |          |          |   |          |         |          |   |          |         |          |   |          |         |          |   |          |          |          |   |          |          |          |   |          |          |          |   |          |          |          |   |          |          |          |   |          |         |          |   |          |          |          |   |          |          |         |   |         |          |          |   |         |         |          |   |          |          |          |   |         |          |          |   |         |          |         |   |         |          |         |   |         |          |         |   |         |         |         |   |         |          |         |   |         |         |         |   |          |          |         |   |         |         |         |   |         |          |          |   |          |         |          |   |          |         |          |
| C                                              | 0.83552                                                                                                                                                                                                                                                                                                                                                                                                                                                                                                                                                                                                                                                                                                                                                                                                                                                                                                                                                                                                                                                                                                                                                                                                                                                                                                                                                                                                                                                                                                                                                                                                                                                                                                                                                                                                                                                                                                                                                                                                                                         | -1.85789 | -0.06022 |          |          |   |          |         |          |   |          |         |          |   |          |         |          |   |          |          |          |   |          |          |          |   |          |          |          |   |          |          |          |   |          |          |          |   |          |         |          |   |          |          |          |   |          |          |         |   |         |          |          |   |         |         |          |   |          |          |          |   |         |          |          |   |         |          |         |   |         |          |         |   |         |          |         |   |         |         |         |   |         |          |         |   |         |         |         |   |          |          |         |   |         |         |         |   |         |          |          |   |          |         |          |   |          |         |          |
| C                                              | 2.33812                                                                                                                                                                                                                                                                                                                                                                                                                                                                                                                                                                                                                                                                                                                                                                                                                                                                                                                                                                                                                                                                                                                                                                                                                                                                                                                                                                                                                                                                                                                                                                                                                                                                                                                                                                                                                                                                                                                                                                                                                                         | -1.51109 | 1.76300  |          |          |   |          |         |          |   |          |         |          |   |          |         |          |   |          |          |          |   |          |          |          |   |          |          |          |   |          |          |          |   |          |          |          |   |          |         |          |   |          |          |          |   |          |          |         |   |         |          |          |   |         |         |          |   |          |          |          |   |         |          |          |   |         |          |         |   |         |          |         |   |         |          |         |   |         |         |         |   |         |          |         |   |         |         |         |   |          |          |         |   |         |         |         |   |         |          |          |   |          |         |          |   |          |         |          |
| C                                              | 1.56228                                                                                                                                                                                                                                                                                                                                                                                                                                                                                                                                                                                                                                                                                                                                                                                                                                                                                                                                                                                                                                                                                                                                                                                                                                                                                                                                                                                                                                                                                                                                                                                                                                                                                                                                                                                                                                                                                                                                                                                                                                         | -0.53023 | 2.57010  |          |          |   |          |         |          |   |          |         |          |   |          |         |          |   |          |          |          |   |          |          |          |   |          |          |          |   |          |          |          |   |          |          |          |   |          |         |          |   |          |          |          |   |          |          |         |   |         |          |          |   |         |         |          |   |          |          |          |   |         |          |          |   |         |          |         |   |         |          |         |   |         |          |         |   |         |         |         |   |         |          |         |   |         |         |         |   |          |          |         |   |         |         |         |   |         |          |          |   |          |         |          |   |          |         |          |
| O                                              | 3.41927                                                                                                                                                                                                                                                                                                                                                                                                                                                                                                                                                                                                                                                                                                                                                                                                                                                                                                                                                                                                                                                                                                                                                                                                                                                                                                                                                                                                                                                                                                                                                                                                                                                                                                                                                                                                                                                                                                                                                                                                                                         | -1.20268 | 1.21322  |          |          |   |          |         |          |   |          |         |          |   |          |         |          |   |          |          |          |   |          |          |          |   |          |          |          |   |          |          |          |   |          |          |          |   |          |         |          |   |          |          |          |   |          |          |         |   |         |          |          |   |         |         |          |   |          |          |          |   |         |          |          |   |         |          |         |   |         |          |         |   |         |          |         |   |         |         |         |   |         |          |         |   |         |         |         |   |          |          |         |   |         |         |         |   |         |          |          |   |          |         |          |   |          |         |          |
| C                                              | 1.90399                                                                                                                                                                                                                                                                                                                                                                                                                                                                                                                                                                                                                                                                                                                                                                                                                                                                                                                                                                                                                                                                                                                                                                                                                                                                                                                                                                                                                                                                                                                                                                                                                                                                                                                                                                                                                                                                                                                                                                                                                                         | 0.83003  | 2.54227  |          |          |   |          |         |          |   |          |         |          |   |          |         |          |   |          |          |          |   |          |          |          |   |          |          |          |   |          |          |          |   |          |          |          |   |          |         |          |   |          |          |          |   |          |          |         |   |         |          |          |   |         |         |          |   |          |          |          |   |         |          |          |   |         |          |         |   |         |          |         |   |         |          |         |   |         |         |         |   |         |          |         |   |         |         |         |   |          |          |         |   |         |         |         |   |         |          |          |   |          |         |          |   |          |         |          |
| C                                              | 0.52808                                                                                                                                                                                                                                                                                                                                                                                                                                                                                                                                                                                                                                                                                                                                                                                                                                                                                                                                                                                                                                                                                                                                                                                                                                                                                                                                                                                                                                                                                                                                                                                                                                                                                                                                                                                                                                                                                                                                                                                                                                         | -0.95579 | 3.41620  |          |          |   |          |         |          |   |          |         |          |   |          |         |          |   |          |          |          |   |          |          |          |   |          |          |          |   |          |          |          |   |          |          |          |   |          |         |          |   |          |          |          |   |          |          |         |   |         |          |          |   |         |         |          |   |          |          |          |   |         |          |          |   |         |          |         |   |         |          |         |   |         |          |         |   |         |         |         |   |         |          |         |   |         |         |         |   |          |          |         |   |         |         |         |   |         |          |          |   |          |         |          |   |          |         |          |
| C                                              | 1.21213                                                                                                                                                                                                                                                                                                                                                                                                                                                                                                                                                                                                                                                                                                                                                                                                                                                                                                                                                                                                                                                                                                                                                                                                                                                                                                                                                                                                                                                                                                                                                                                                                                                                                                                                                                                                                                                                                                                                                                                                                                         | 1.74456  | 3.33447  |          |          |   |          |         |          |   |          |         |          |   |          |         |          |   |          |          |          |   |          |          |          |   |          |          |          |   |          |          |          |   |          |          |          |   |          |         |          |   |          |          |          |   |          |          |         |   |         |          |          |   |         |         |          |   |          |          |          |   |         |          |          |   |         |          |         |   |         |          |         |   |         |          |         |   |         |         |         |   |         |          |         |   |         |         |         |   |          |          |         |   |         |         |         |   |         |          |          |   |          |         |          |   |          |         |          |
| C                                              | -0.16389                                                                                                                                                                                                                                                                                                                                                                                                                                                                                                                                                                                                                                                                                                                                                                                                                                                                                                                                                                                                                                                                                                                                                                                                                                                                                                                                                                                                                                                                                                                                                                                                                                                                                                                                                                                                                                                                                                                                                                                                                                        | -0.04117 | 4.20780  |          |          |   |          |         |          |   |          |         |          |   |          |         |          |   |          |          |          |   |          |          |          |   |          |          |          |   |          |          |          |   |          |          |          |   |          |         |          |   |          |          |          |   |          |          |         |   |         |          |          |   |         |         |          |   |          |          |          |   |         |          |          |   |         |          |         |   |         |          |         |   |         |          |         |   |         |         |         |   |         |          |         |   |         |         |         |   |          |          |         |   |         |         |         |   |         |          |          |   |          |         |          |   |          |         |          |
| C                                              | 0.17521                                                                                                                                                                                                                                                                                                                                                                                                                                                                                                                                                                                                                                                                                                                                                                                                                                                                                                                                                                                                                                                                                                                                                                                                                                                                                                                                                                                                                                                                                                                                                                                                                                                                                                                                                                                                                                                                                                                                                                                                                                         | 1.31409  | 4.16772  |          |          |   |          |         |          |   |          |         |          |   |          |         |          |   |          |          |          |   |          |          |          |   |          |          |          |   |          |          |          |   |          |          |          |   |          |         |          |   |          |          |          |   |          |          |         |   |         |          |          |   |         |         |          |   |          |          |          |   |         |          |          |   |         |          |         |   |         |          |         |   |         |          |         |   |         |         |         |   |         |          |         |   |         |         |         |   |          |          |         |   |         |         |         |   |         |          |          |   |          |         |          |   |          |         |          |
| H                                              | 1.69444                                                                                                                                                                                                                                                                                                                                                                                                                                                                                                                                                                                                                                                                                                                                                                                                                                                                                                                                                                                                                                                                                                                                                                                                                                                                                                                                                                                                                                                                                                                                                                                                                                                                                                                                                                                                                                                                                                                                                                                                                                         | -2.32123 | -0.53494 |          |          |   |          |         |          |   |          |         |          |   |          |         |          |   |          |          |          |   |          |          |          |   |          |          |          |   |          |          |          |   |          |          |          |   |          |         |          |   |          |          |          |   |          |          |         |   |         |          |          |   |         |         |          |   |          |          |          |   |         |          |          |   |         |          |         |   |         |          |         |   |         |          |         |   |         |         |         |   |         |          |         |   |         |         |         |   |          |          |         |   |         |         |         |   |         |          |          |   |          |         |          |   |          |         |          |
| O                                              | -0.58918                                                                                                                                                                                                                                                                                                                                                                                                                                                                                                                                                                                                                                                                                                                                                                                                                                                                                                                                                                                                                                                                                                                                                                                                                                                                                                                                                                                                                                                                                                                                                                                                                                                                                                                                                                                                                                                                                                                                                                                                                                        | 0.01061  | -0.03272 |          |          |   |          |         |          |   |          |         |          |   |          |         |          |   |          |          |          |   |          |          |          |   |          |          |          |   |          |          |          |   |          |          |          |   |          |         |          |   |          |          |          |   |          |          |         |   |         |          |          |   |         |         |          |   |          |          |          |   |         |          |          |   |         |          |         |   |         |          |         |   |         |          |         |   |         |         |         |   |         |          |         |   |         |         |         |   |          |          |         |   |         |         |         |   |         |          |          |   |          |         |          |   |          |         |          |
| C                                              | -0.76638                                                                                                                                                                                                                                                                                                                                                                                                                                                                                                                                                                                                                                                                                                                                                                                                                                                                                                                                                                                                                                                                                                                                                                                                                                                                                                                                                                                                                                                                                                                                                                                                                                                                                                                                                                                                                                                                                                                                                                                                                                        | 1.41466  | -0.21225 |          |          |   |          |         |          |   |          |         |          |   |          |         |          |   |          |          |          |   |          |          |          |   |          |          |          |   |          |          |          |   |          |          |          |   |          |         |          |   |          |          |          |   |          |          |         |   |         |          |          |   |         |         |          |   |          |          |          |   |         |          |          |   |         |          |         |   |         |          |         |   |         |          |         |   |         |         |         |   |         |          |         |   |         |         |         |   |          |          |         |   |         |         |         |   |         |          |          |   |          |         |          |   |          |         |          |

|   |          |          |          |
|---|----------|----------|----------|
| C | 0.11681  | -4.14550 | 0.74015  |
| C | 4.66977  | 2.66005  | -0.36384 |
| O | 5.27549  | 3.68535  | -0.04909 |
| C | 5.45012  | 1.34359  | -0.51763 |
| N | 4.73600  | 0.20768  | -1.05632 |
| C | 4.77222  | -0.08738 | -2.39617 |
| O | 5.50054  | 0.50874  | -3.18701 |
| C | 3.85419  | -1.22544 | -2.80878 |
| N | 3.32968  | 2.59863  | -0.56760 |
| C | 2.49103  | 3.77353  | -0.45212 |
| H | -0.96625 | -0.38345 | 4.85721  |
| H | -0.36272 | 2.02935  | 4.78536  |
| H | 1.48633  | 2.79668  | 3.30762  |
| H | 2.71456  | 1.14907  | 1.89655  |
| H | 0.26948  | -2.01227 | 3.45222  |
| H | 0.66490  | -4.10978 | 1.68783  |
| H | 0.77730  | -4.61479 | 0.00188  |
| H | -0.76302 | -4.78416 | 0.87594  |
| H | -0.45077 | -4.25862 | -2.07628 |
| H | 2.12437  | -2.56449 | 2.00195  |
| H | -0.10040 | -2.53895 | -2.39938 |
| H | -1.72846 | -3.19994 | -2.72409 |
| H | -0.90956 | -2.27823 | 1.09224  |
| H | -7.77879 | -1.52824 | 0.73868  |
| H | -7.97493 | -1.75035 | -1.00100 |
| H | -7.41825 | -3.10109 | 0.00396  |
| H | 2.81371  | -0.93017 | -2.63392 |
| H | 4.05132  | -2.11740 | -2.20227 |
| H | 4.01470  | -1.44371 | -3.86644 |
| H | 4.05272  | -0.25266 | -0.45658 |
| H | 6.29412  | 1.55828  | -1.17642 |
| H | 5.84812  | 1.09433  | 0.47305  |
| H | 2.87392  | 1.71164  | -0.77517 |
| H | 1.89093  | 3.91262  | -1.35921 |
| H | 1.80680  | 3.69620  | 0.40317  |
| H | -5.74476 | 5.20918  | -0.91838 |
| H | -1.80799 | 1.62372  | 0.04141  |
| H | -0.10867 | 1.98364  | 0.45156  |
| H | -7.25324 | 4.52283  | -1.59513 |
| H | -0.56454 | 1.71174  | -1.24629 |
| H | -7.05403 | 4.62715  | 0.15397  |
| H | 3.14303  | 4.63720  | -0.30919 |
| O | 4.99128  | -3.09967 | -0.12490 |
| H | 4.39724  | -2.53234 | 0.41838  |
| H | 5.62317  | -2.44894 | -0.46669 |
| H | -2.74555 | -1.79941 | -0.66993 |
| H | -6.35071 | 1.19380  | -0.60756 |
| H | -3.67057 | 0.62065  | -0.89316 |
| H | -4.62999 | -3.43514 | -0.25461 |

Optimized Molecular Properties for **T3-INT2**

|                                                |                                                                                                                                                                                                                                                                                                                                                                                                                                                                                                                                                                                                                                                                                                                                                                                                                                                                                                                                                                                                                                                                                                                                                                                                                                                                                                                                                                                                                                                                                                                                                                                                                                                                                                                                                                                                                                                                                                                                                                                                                                                     |          |          |          |          |   |          |         |          |   |          |         |          |   |          |         |          |   |          |          |          |   |          |          |          |   |          |          |          |   |          |          |          |   |          |          |          |   |          |         |          |   |          |          |          |   |          |          |         |   |         |          |          |   |         |         |          |   |          |          |          |   |         |          |         |   |         |          |         |   |         |         |         |   |         |          |         |   |         |         |         |   |         |         |         |   |         |         |         |   |          |         |         |   |         |         |         |   |         |          |         |   |          |         |          |   |          |         |          |
|------------------------------------------------|-----------------------------------------------------------------------------------------------------------------------------------------------------------------------------------------------------------------------------------------------------------------------------------------------------------------------------------------------------------------------------------------------------------------------------------------------------------------------------------------------------------------------------------------------------------------------------------------------------------------------------------------------------------------------------------------------------------------------------------------------------------------------------------------------------------------------------------------------------------------------------------------------------------------------------------------------------------------------------------------------------------------------------------------------------------------------------------------------------------------------------------------------------------------------------------------------------------------------------------------------------------------------------------------------------------------------------------------------------------------------------------------------------------------------------------------------------------------------------------------------------------------------------------------------------------------------------------------------------------------------------------------------------------------------------------------------------------------------------------------------------------------------------------------------------------------------------------------------------------------------------------------------------------------------------------------------------------------------------------------------------------------------------------------------------|----------|----------|----------|----------|---|----------|---------|----------|---|----------|---------|----------|---|----------|---------|----------|---|----------|----------|----------|---|----------|----------|----------|---|----------|----------|----------|---|----------|----------|----------|---|----------|----------|----------|---|----------|---------|----------|---|----------|----------|----------|---|----------|----------|---------|---|---------|----------|----------|---|---------|---------|----------|---|----------|----------|----------|---|---------|----------|---------|---|---------|----------|---------|---|---------|---------|---------|---|---------|----------|---------|---|---------|---------|---------|---|---------|---------|---------|---|---------|---------|---------|---|----------|---------|---------|---|---------|---------|---------|---|---------|----------|---------|---|----------|---------|----------|---|----------|---------|----------|
| Number of<br>(-)<br>Vibrational<br>Frequencies | 0                                                                                                                                                                                                                                                                                                                                                                                                                                                                                                                                                                                                                                                                                                                                                                                                                                                                                                                                                                                                                                                                                                                                                                                                                                                                                                                                                                                                                                                                                                                                                                                                                                                                                                                                                                                                                                                                                                                                                                                                                                                   |          |          |          |          |   |          |         |          |   |          |         |          |   |          |         |          |   |          |          |          |   |          |          |          |   |          |          |          |   |          |          |          |   |          |          |          |   |          |         |          |   |          |          |          |   |          |          |         |   |         |          |          |   |         |         |          |   |          |          |          |   |         |          |         |   |         |          |         |   |         |         |         |   |         |          |         |   |         |         |         |   |         |         |         |   |         |         |         |   |          |         |         |   |         |         |         |   |         |          |         |   |          |         |          |   |          |         |          |
| Absolute<br>Energies<br>(Hartrees)             | <p><b>B3LYP/6-31G(d)</b></p> <p>There are 25 positive frequencies below 100 cm<sup>-1</sup>.</p> <p>Zero-point correction: 0.630434 hartree<br/>         Enthalpy correction: 0.677271 hartree<br/>         Free Energy correction: 0.539420 hartree<br/>         Quasiharmonic Free Energy correction: 0.558809 hartree</p> <p>SCF Energy: -1834.190324 hartree<br/>         SCF Energy + ZPVE: -1833.559890 hartree<br/>         Enthalpy: -1833.513053 hartree<br/>         Free Energy: -1833.650904 hartree</p> <p>Free Energy with quasiharmonic correction: -1833.631514 hartree<br/>         (correction: 12.17 kcal/mol)</p> <p><b>B3LYP-D3/6-311+G(d,p)</b></p> <p>SCF Done: E(RB3LYP) = -1834.87132759 A.U.</p>                                                                                                                                                                                                                                                                                                                                                                                                                                                                                                                                                                                                                                                                                                                                                                                                                                                                                                                                                                                                                                                                                                                                                                                                                                                                                                                          |          |          |          |          |   |          |         |          |   |          |         |          |   |          |         |          |   |          |          |          |   |          |          |          |   |          |          |          |   |          |          |          |   |          |          |          |   |          |         |          |   |          |          |          |   |          |          |         |   |         |          |          |   |         |         |          |   |          |          |          |   |         |          |         |   |         |          |         |   |         |         |         |   |         |          |         |   |         |         |         |   |         |         |         |   |         |         |         |   |          |         |         |   |         |         |         |   |         |          |         |   |          |         |          |   |          |         |          |
| Cartesian<br>Coordinates                       | <p>76<br/>spD3-INT2-T3.out Energy: -1151399.1324593</p> <table> <tbody> <tr><td>O</td><td>-1.18018</td><td>-2.65747</td><td>-0.05988</td></tr> <tr><td>C</td><td>-5.58770</td><td>2.81801</td><td>-0.88059</td></tr> <tr><td>O</td><td>-4.40501</td><td>2.51778</td><td>-0.83162</td></tr> <tr><td>O</td><td>-6.59545</td><td>1.95307</td><td>-0.81849</td></tr> <tr><td>C</td><td>-6.06332</td><td>-1.84240</td><td>-0.45542</td></tr> <tr><td>C</td><td>-4.99353</td><td>-2.69401</td><td>-0.31581</td></tr> <tr><td>N</td><td>-5.59220</td><td>-0.54615</td><td>-0.54978</td></tr> <tr><td>C</td><td>-4.27220</td><td>-0.62405</td><td>-0.46875</td></tr> <tr><td>N</td><td>-3.86366</td><td>-1.90339</td><td>-0.32735</td></tr> <tr><td>C</td><td>-6.07569</td><td>4.24746</td><td>-1.02139</td></tr> <tr><td>C</td><td>-7.52485</td><td>-2.16036</td><td>-0.50758</td></tr> <tr><td>C</td><td>-0.44693</td><td>-2.12322</td><td>1.08625</td></tr> <tr><td>C</td><td>0.51243</td><td>-0.26012</td><td>-0.36321</td></tr> <tr><td>O</td><td>1.27829</td><td>0.09543</td><td>-1.24582</td></tr> <tr><td>C</td><td>-0.49843</td><td>-3.58269</td><td>-0.89620</td></tr> <tr><td>C</td><td>0.79920</td><td>-1.35632</td><td>0.62633</td></tr> <tr><td>C</td><td>1.78360</td><td>-0.78839</td><td>1.81929</td></tr> <tr><td>C</td><td>1.36348</td><td>0.62445</td><td>2.26038</td></tr> <tr><td>O</td><td>3.07677</td><td>-0.88872</td><td>1.45400</td></tr> <tr><td>C</td><td>2.15858</td><td>1.72174</td><td>1.91434</td></tr> <tr><td>C</td><td>0.21918</td><td>0.85255</td><td>3.03638</td></tr> <tr><td>C</td><td>1.80617</td><td>3.01538</td><td>2.30597</td></tr> <tr><td>C</td><td>-0.13795</td><td>2.14176</td><td>3.43425</td></tr> <tr><td>C</td><td>0.65383</td><td>3.23210</td><td>3.06506</td></tr> <tr><td>H</td><td>1.47161</td><td>-2.05986</td><td>0.13459</td></tr> <tr><td>O</td><td>-0.66883</td><td>0.36985</td><td>-0.14777</td></tr> <tr><td>C</td><td>-0.89358</td><td>1.55311</td><td>-0.93303</td></tr> </tbody> </table> | O        | -1.18018 | -2.65747 | -0.05988 | C | -5.58770 | 2.81801 | -0.88059 | O | -4.40501 | 2.51778 | -0.83162 | O | -6.59545 | 1.95307 | -0.81849 | C | -6.06332 | -1.84240 | -0.45542 | C | -4.99353 | -2.69401 | -0.31581 | N | -5.59220 | -0.54615 | -0.54978 | C | -4.27220 | -0.62405 | -0.46875 | N | -3.86366 | -1.90339 | -0.32735 | C | -6.07569 | 4.24746 | -1.02139 | C | -7.52485 | -2.16036 | -0.50758 | C | -0.44693 | -2.12322 | 1.08625 | C | 0.51243 | -0.26012 | -0.36321 | O | 1.27829 | 0.09543 | -1.24582 | C | -0.49843 | -3.58269 | -0.89620 | C | 0.79920 | -1.35632 | 0.62633 | C | 1.78360 | -0.78839 | 1.81929 | C | 1.36348 | 0.62445 | 2.26038 | O | 3.07677 | -0.88872 | 1.45400 | C | 2.15858 | 1.72174 | 1.91434 | C | 0.21918 | 0.85255 | 3.03638 | C | 1.80617 | 3.01538 | 2.30597 | C | -0.13795 | 2.14176 | 3.43425 | C | 0.65383 | 3.23210 | 3.06506 | H | 1.47161 | -2.05986 | 0.13459 | O | -0.66883 | 0.36985 | -0.14777 | C | -0.89358 | 1.55311 | -0.93303 |
| O                                              | -1.18018                                                                                                                                                                                                                                                                                                                                                                                                                                                                                                                                                                                                                                                                                                                                                                                                                                                                                                                                                                                                                                                                                                                                                                                                                                                                                                                                                                                                                                                                                                                                                                                                                                                                                                                                                                                                                                                                                                                                                                                                                                            | -2.65747 | -0.05988 |          |          |   |          |         |          |   |          |         |          |   |          |         |          |   |          |          |          |   |          |          |          |   |          |          |          |   |          |          |          |   |          |          |          |   |          |         |          |   |          |          |          |   |          |          |         |   |         |          |          |   |         |         |          |   |          |          |          |   |         |          |         |   |         |          |         |   |         |         |         |   |         |          |         |   |         |         |         |   |         |         |         |   |         |         |         |   |          |         |         |   |         |         |         |   |         |          |         |   |          |         |          |   |          |         |          |
| C                                              | -5.58770                                                                                                                                                                                                                                                                                                                                                                                                                                                                                                                                                                                                                                                                                                                                                                                                                                                                                                                                                                                                                                                                                                                                                                                                                                                                                                                                                                                                                                                                                                                                                                                                                                                                                                                                                                                                                                                                                                                                                                                                                                            | 2.81801  | -0.88059 |          |          |   |          |         |          |   |          |         |          |   |          |         |          |   |          |          |          |   |          |          |          |   |          |          |          |   |          |          |          |   |          |          |          |   |          |         |          |   |          |          |          |   |          |          |         |   |         |          |          |   |         |         |          |   |          |          |          |   |         |          |         |   |         |          |         |   |         |         |         |   |         |          |         |   |         |         |         |   |         |         |         |   |         |         |         |   |          |         |         |   |         |         |         |   |         |          |         |   |          |         |          |   |          |         |          |
| O                                              | -4.40501                                                                                                                                                                                                                                                                                                                                                                                                                                                                                                                                                                                                                                                                                                                                                                                                                                                                                                                                                                                                                                                                                                                                                                                                                                                                                                                                                                                                                                                                                                                                                                                                                                                                                                                                                                                                                                                                                                                                                                                                                                            | 2.51778  | -0.83162 |          |          |   |          |         |          |   |          |         |          |   |          |         |          |   |          |          |          |   |          |          |          |   |          |          |          |   |          |          |          |   |          |          |          |   |          |         |          |   |          |          |          |   |          |          |         |   |         |          |          |   |         |         |          |   |          |          |          |   |         |          |         |   |         |          |         |   |         |         |         |   |         |          |         |   |         |         |         |   |         |         |         |   |         |         |         |   |          |         |         |   |         |         |         |   |         |          |         |   |          |         |          |   |          |         |          |
| O                                              | -6.59545                                                                                                                                                                                                                                                                                                                                                                                                                                                                                                                                                                                                                                                                                                                                                                                                                                                                                                                                                                                                                                                                                                                                                                                                                                                                                                                                                                                                                                                                                                                                                                                                                                                                                                                                                                                                                                                                                                                                                                                                                                            | 1.95307  | -0.81849 |          |          |   |          |         |          |   |          |         |          |   |          |         |          |   |          |          |          |   |          |          |          |   |          |          |          |   |          |          |          |   |          |          |          |   |          |         |          |   |          |          |          |   |          |          |         |   |         |          |          |   |         |         |          |   |          |          |          |   |         |          |         |   |         |          |         |   |         |         |         |   |         |          |         |   |         |         |         |   |         |         |         |   |         |         |         |   |          |         |         |   |         |         |         |   |         |          |         |   |          |         |          |   |          |         |          |
| C                                              | -6.06332                                                                                                                                                                                                                                                                                                                                                                                                                                                                                                                                                                                                                                                                                                                                                                                                                                                                                                                                                                                                                                                                                                                                                                                                                                                                                                                                                                                                                                                                                                                                                                                                                                                                                                                                                                                                                                                                                                                                                                                                                                            | -1.84240 | -0.45542 |          |          |   |          |         |          |   |          |         |          |   |          |         |          |   |          |          |          |   |          |          |          |   |          |          |          |   |          |          |          |   |          |          |          |   |          |         |          |   |          |          |          |   |          |          |         |   |         |          |          |   |         |         |          |   |          |          |          |   |         |          |         |   |         |          |         |   |         |         |         |   |         |          |         |   |         |         |         |   |         |         |         |   |         |         |         |   |          |         |         |   |         |         |         |   |         |          |         |   |          |         |          |   |          |         |          |
| C                                              | -4.99353                                                                                                                                                                                                                                                                                                                                                                                                                                                                                                                                                                                                                                                                                                                                                                                                                                                                                                                                                                                                                                                                                                                                                                                                                                                                                                                                                                                                                                                                                                                                                                                                                                                                                                                                                                                                                                                                                                                                                                                                                                            | -2.69401 | -0.31581 |          |          |   |          |         |          |   |          |         |          |   |          |         |          |   |          |          |          |   |          |          |          |   |          |          |          |   |          |          |          |   |          |          |          |   |          |         |          |   |          |          |          |   |          |          |         |   |         |          |          |   |         |         |          |   |          |          |          |   |         |          |         |   |         |          |         |   |         |         |         |   |         |          |         |   |         |         |         |   |         |         |         |   |         |         |         |   |          |         |         |   |         |         |         |   |         |          |         |   |          |         |          |   |          |         |          |
| N                                              | -5.59220                                                                                                                                                                                                                                                                                                                                                                                                                                                                                                                                                                                                                                                                                                                                                                                                                                                                                                                                                                                                                                                                                                                                                                                                                                                                                                                                                                                                                                                                                                                                                                                                                                                                                                                                                                                                                                                                                                                                                                                                                                            | -0.54615 | -0.54978 |          |          |   |          |         |          |   |          |         |          |   |          |         |          |   |          |          |          |   |          |          |          |   |          |          |          |   |          |          |          |   |          |          |          |   |          |         |          |   |          |          |          |   |          |          |         |   |         |          |          |   |         |         |          |   |          |          |          |   |         |          |         |   |         |          |         |   |         |         |         |   |         |          |         |   |         |         |         |   |         |         |         |   |         |         |         |   |          |         |         |   |         |         |         |   |         |          |         |   |          |         |          |   |          |         |          |
| C                                              | -4.27220                                                                                                                                                                                                                                                                                                                                                                                                                                                                                                                                                                                                                                                                                                                                                                                                                                                                                                                                                                                                                                                                                                                                                                                                                                                                                                                                                                                                                                                                                                                                                                                                                                                                                                                                                                                                                                                                                                                                                                                                                                            | -0.62405 | -0.46875 |          |          |   |          |         |          |   |          |         |          |   |          |         |          |   |          |          |          |   |          |          |          |   |          |          |          |   |          |          |          |   |          |          |          |   |          |         |          |   |          |          |          |   |          |          |         |   |         |          |          |   |         |         |          |   |          |          |          |   |         |          |         |   |         |          |         |   |         |         |         |   |         |          |         |   |         |         |         |   |         |         |         |   |         |         |         |   |          |         |         |   |         |         |         |   |         |          |         |   |          |         |          |   |          |         |          |
| N                                              | -3.86366                                                                                                                                                                                                                                                                                                                                                                                                                                                                                                                                                                                                                                                                                                                                                                                                                                                                                                                                                                                                                                                                                                                                                                                                                                                                                                                                                                                                                                                                                                                                                                                                                                                                                                                                                                                                                                                                                                                                                                                                                                            | -1.90339 | -0.32735 |          |          |   |          |         |          |   |          |         |          |   |          |         |          |   |          |          |          |   |          |          |          |   |          |          |          |   |          |          |          |   |          |          |          |   |          |         |          |   |          |          |          |   |          |          |         |   |         |          |          |   |         |         |          |   |          |          |          |   |         |          |         |   |         |          |         |   |         |         |         |   |         |          |         |   |         |         |         |   |         |         |         |   |         |         |         |   |          |         |         |   |         |         |         |   |         |          |         |   |          |         |          |   |          |         |          |
| C                                              | -6.07569                                                                                                                                                                                                                                                                                                                                                                                                                                                                                                                                                                                                                                                                                                                                                                                                                                                                                                                                                                                                                                                                                                                                                                                                                                                                                                                                                                                                                                                                                                                                                                                                                                                                                                                                                                                                                                                                                                                                                                                                                                            | 4.24746  | -1.02139 |          |          |   |          |         |          |   |          |         |          |   |          |         |          |   |          |          |          |   |          |          |          |   |          |          |          |   |          |          |          |   |          |          |          |   |          |         |          |   |          |          |          |   |          |          |         |   |         |          |          |   |         |         |          |   |          |          |          |   |         |          |         |   |         |          |         |   |         |         |         |   |         |          |         |   |         |         |         |   |         |         |         |   |         |         |         |   |          |         |         |   |         |         |         |   |         |          |         |   |          |         |          |   |          |         |          |
| C                                              | -7.52485                                                                                                                                                                                                                                                                                                                                                                                                                                                                                                                                                                                                                                                                                                                                                                                                                                                                                                                                                                                                                                                                                                                                                                                                                                                                                                                                                                                                                                                                                                                                                                                                                                                                                                                                                                                                                                                                                                                                                                                                                                            | -2.16036 | -0.50758 |          |          |   |          |         |          |   |          |         |          |   |          |         |          |   |          |          |          |   |          |          |          |   |          |          |          |   |          |          |          |   |          |          |          |   |          |         |          |   |          |          |          |   |          |          |         |   |         |          |          |   |         |         |          |   |          |          |          |   |         |          |         |   |         |          |         |   |         |         |         |   |         |          |         |   |         |         |         |   |         |         |         |   |         |         |         |   |          |         |         |   |         |         |         |   |         |          |         |   |          |         |          |   |          |         |          |
| C                                              | -0.44693                                                                                                                                                                                                                                                                                                                                                                                                                                                                                                                                                                                                                                                                                                                                                                                                                                                                                                                                                                                                                                                                                                                                                                                                                                                                                                                                                                                                                                                                                                                                                                                                                                                                                                                                                                                                                                                                                                                                                                                                                                            | -2.12322 | 1.08625  |          |          |   |          |         |          |   |          |         |          |   |          |         |          |   |          |          |          |   |          |          |          |   |          |          |          |   |          |          |          |   |          |          |          |   |          |         |          |   |          |          |          |   |          |          |         |   |         |          |          |   |         |         |          |   |          |          |          |   |         |          |         |   |         |          |         |   |         |         |         |   |         |          |         |   |         |         |         |   |         |         |         |   |         |         |         |   |          |         |         |   |         |         |         |   |         |          |         |   |          |         |          |   |          |         |          |
| C                                              | 0.51243                                                                                                                                                                                                                                                                                                                                                                                                                                                                                                                                                                                                                                                                                                                                                                                                                                                                                                                                                                                                                                                                                                                                                                                                                                                                                                                                                                                                                                                                                                                                                                                                                                                                                                                                                                                                                                                                                                                                                                                                                                             | -0.26012 | -0.36321 |          |          |   |          |         |          |   |          |         |          |   |          |         |          |   |          |          |          |   |          |          |          |   |          |          |          |   |          |          |          |   |          |          |          |   |          |         |          |   |          |          |          |   |          |          |         |   |         |          |          |   |         |         |          |   |          |          |          |   |         |          |         |   |         |          |         |   |         |         |         |   |         |          |         |   |         |         |         |   |         |         |         |   |         |         |         |   |          |         |         |   |         |         |         |   |         |          |         |   |          |         |          |   |          |         |          |
| O                                              | 1.27829                                                                                                                                                                                                                                                                                                                                                                                                                                                                                                                                                                                                                                                                                                                                                                                                                                                                                                                                                                                                                                                                                                                                                                                                                                                                                                                                                                                                                                                                                                                                                                                                                                                                                                                                                                                                                                                                                                                                                                                                                                             | 0.09543  | -1.24582 |          |          |   |          |         |          |   |          |         |          |   |          |         |          |   |          |          |          |   |          |          |          |   |          |          |          |   |          |          |          |   |          |          |          |   |          |         |          |   |          |          |          |   |          |          |         |   |         |          |          |   |         |         |          |   |          |          |          |   |         |          |         |   |         |          |         |   |         |         |         |   |         |          |         |   |         |         |         |   |         |         |         |   |         |         |         |   |          |         |         |   |         |         |         |   |         |          |         |   |          |         |          |   |          |         |          |
| C                                              | -0.49843                                                                                                                                                                                                                                                                                                                                                                                                                                                                                                                                                                                                                                                                                                                                                                                                                                                                                                                                                                                                                                                                                                                                                                                                                                                                                                                                                                                                                                                                                                                                                                                                                                                                                                                                                                                                                                                                                                                                                                                                                                            | -3.58269 | -0.89620 |          |          |   |          |         |          |   |          |         |          |   |          |         |          |   |          |          |          |   |          |          |          |   |          |          |          |   |          |          |          |   |          |          |          |   |          |         |          |   |          |          |          |   |          |          |         |   |         |          |          |   |         |         |          |   |          |          |          |   |         |          |         |   |         |          |         |   |         |         |         |   |         |          |         |   |         |         |         |   |         |         |         |   |         |         |         |   |          |         |         |   |         |         |         |   |         |          |         |   |          |         |          |   |          |         |          |
| C                                              | 0.79920                                                                                                                                                                                                                                                                                                                                                                                                                                                                                                                                                                                                                                                                                                                                                                                                                                                                                                                                                                                                                                                                                                                                                                                                                                                                                                                                                                                                                                                                                                                                                                                                                                                                                                                                                                                                                                                                                                                                                                                                                                             | -1.35632 | 0.62633  |          |          |   |          |         |          |   |          |         |          |   |          |         |          |   |          |          |          |   |          |          |          |   |          |          |          |   |          |          |          |   |          |          |          |   |          |         |          |   |          |          |          |   |          |          |         |   |         |          |          |   |         |         |          |   |          |          |          |   |         |          |         |   |         |          |         |   |         |         |         |   |         |          |         |   |         |         |         |   |         |         |         |   |         |         |         |   |          |         |         |   |         |         |         |   |         |          |         |   |          |         |          |   |          |         |          |
| C                                              | 1.78360                                                                                                                                                                                                                                                                                                                                                                                                                                                                                                                                                                                                                                                                                                                                                                                                                                                                                                                                                                                                                                                                                                                                                                                                                                                                                                                                                                                                                                                                                                                                                                                                                                                                                                                                                                                                                                                                                                                                                                                                                                             | -0.78839 | 1.81929  |          |          |   |          |         |          |   |          |         |          |   |          |         |          |   |          |          |          |   |          |          |          |   |          |          |          |   |          |          |          |   |          |          |          |   |          |         |          |   |          |          |          |   |          |          |         |   |         |          |          |   |         |         |          |   |          |          |          |   |         |          |         |   |         |          |         |   |         |         |         |   |         |          |         |   |         |         |         |   |         |         |         |   |         |         |         |   |          |         |         |   |         |         |         |   |         |          |         |   |          |         |          |   |          |         |          |
| C                                              | 1.36348                                                                                                                                                                                                                                                                                                                                                                                                                                                                                                                                                                                                                                                                                                                                                                                                                                                                                                                                                                                                                                                                                                                                                                                                                                                                                                                                                                                                                                                                                                                                                                                                                                                                                                                                                                                                                                                                                                                                                                                                                                             | 0.62445  | 2.26038  |          |          |   |          |         |          |   |          |         |          |   |          |         |          |   |          |          |          |   |          |          |          |   |          |          |          |   |          |          |          |   |          |          |          |   |          |         |          |   |          |          |          |   |          |          |         |   |         |          |          |   |         |         |          |   |          |          |          |   |         |          |         |   |         |          |         |   |         |         |         |   |         |          |         |   |         |         |         |   |         |         |         |   |         |         |         |   |          |         |         |   |         |         |         |   |         |          |         |   |          |         |          |   |          |         |          |
| O                                              | 3.07677                                                                                                                                                                                                                                                                                                                                                                                                                                                                                                                                                                                                                                                                                                                                                                                                                                                                                                                                                                                                                                                                                                                                                                                                                                                                                                                                                                                                                                                                                                                                                                                                                                                                                                                                                                                                                                                                                                                                                                                                                                             | -0.88872 | 1.45400  |          |          |   |          |         |          |   |          |         |          |   |          |         |          |   |          |          |          |   |          |          |          |   |          |          |          |   |          |          |          |   |          |          |          |   |          |         |          |   |          |          |          |   |          |          |         |   |         |          |          |   |         |         |          |   |          |          |          |   |         |          |         |   |         |          |         |   |         |         |         |   |         |          |         |   |         |         |         |   |         |         |         |   |         |         |         |   |          |         |         |   |         |         |         |   |         |          |         |   |          |         |          |   |          |         |          |
| C                                              | 2.15858                                                                                                                                                                                                                                                                                                                                                                                                                                                                                                                                                                                                                                                                                                                                                                                                                                                                                                                                                                                                                                                                                                                                                                                                                                                                                                                                                                                                                                                                                                                                                                                                                                                                                                                                                                                                                                                                                                                                                                                                                                             | 1.72174  | 1.91434  |          |          |   |          |         |          |   |          |         |          |   |          |         |          |   |          |          |          |   |          |          |          |   |          |          |          |   |          |          |          |   |          |          |          |   |          |         |          |   |          |          |          |   |          |          |         |   |         |          |          |   |         |         |          |   |          |          |          |   |         |          |         |   |         |          |         |   |         |         |         |   |         |          |         |   |         |         |         |   |         |         |         |   |         |         |         |   |          |         |         |   |         |         |         |   |         |          |         |   |          |         |          |   |          |         |          |
| C                                              | 0.21918                                                                                                                                                                                                                                                                                                                                                                                                                                                                                                                                                                                                                                                                                                                                                                                                                                                                                                                                                                                                                                                                                                                                                                                                                                                                                                                                                                                                                                                                                                                                                                                                                                                                                                                                                                                                                                                                                                                                                                                                                                             | 0.85255  | 3.03638  |          |          |   |          |         |          |   |          |         |          |   |          |         |          |   |          |          |          |   |          |          |          |   |          |          |          |   |          |          |          |   |          |          |          |   |          |         |          |   |          |          |          |   |          |          |         |   |         |          |          |   |         |         |          |   |          |          |          |   |         |          |         |   |         |          |         |   |         |         |         |   |         |          |         |   |         |         |         |   |         |         |         |   |         |         |         |   |          |         |         |   |         |         |         |   |         |          |         |   |          |         |          |   |          |         |          |
| C                                              | 1.80617                                                                                                                                                                                                                                                                                                                                                                                                                                                                                                                                                                                                                                                                                                                                                                                                                                                                                                                                                                                                                                                                                                                                                                                                                                                                                                                                                                                                                                                                                                                                                                                                                                                                                                                                                                                                                                                                                                                                                                                                                                             | 3.01538  | 2.30597  |          |          |   |          |         |          |   |          |         |          |   |          |         |          |   |          |          |          |   |          |          |          |   |          |          |          |   |          |          |          |   |          |          |          |   |          |         |          |   |          |          |          |   |          |          |         |   |         |          |          |   |         |         |          |   |          |          |          |   |         |          |         |   |         |          |         |   |         |         |         |   |         |          |         |   |         |         |         |   |         |         |         |   |         |         |         |   |          |         |         |   |         |         |         |   |         |          |         |   |          |         |          |   |          |         |          |
| C                                              | -0.13795                                                                                                                                                                                                                                                                                                                                                                                                                                                                                                                                                                                                                                                                                                                                                                                                                                                                                                                                                                                                                                                                                                                                                                                                                                                                                                                                                                                                                                                                                                                                                                                                                                                                                                                                                                                                                                                                                                                                                                                                                                            | 2.14176  | 3.43425  |          |          |   |          |         |          |   |          |         |          |   |          |         |          |   |          |          |          |   |          |          |          |   |          |          |          |   |          |          |          |   |          |          |          |   |          |         |          |   |          |          |          |   |          |          |         |   |         |          |          |   |         |         |          |   |          |          |          |   |         |          |         |   |         |          |         |   |         |         |         |   |         |          |         |   |         |         |         |   |         |         |         |   |         |         |         |   |          |         |         |   |         |         |         |   |         |          |         |   |          |         |          |   |          |         |          |
| C                                              | 0.65383                                                                                                                                                                                                                                                                                                                                                                                                                                                                                                                                                                                                                                                                                                                                                                                                                                                                                                                                                                                                                                                                                                                                                                                                                                                                                                                                                                                                                                                                                                                                                                                                                                                                                                                                                                                                                                                                                                                                                                                                                                             | 3.23210  | 3.06506  |          |          |   |          |         |          |   |          |         |          |   |          |         |          |   |          |          |          |   |          |          |          |   |          |          |          |   |          |          |          |   |          |          |          |   |          |         |          |   |          |          |          |   |          |          |         |   |         |          |          |   |         |         |          |   |          |          |          |   |         |          |         |   |         |          |         |   |         |         |         |   |         |          |         |   |         |         |         |   |         |         |         |   |         |         |         |   |          |         |         |   |         |         |         |   |         |          |         |   |          |         |          |   |          |         |          |
| H                                              | 1.47161                                                                                                                                                                                                                                                                                                                                                                                                                                                                                                                                                                                                                                                                                                                                                                                                                                                                                                                                                                                                                                                                                                                                                                                                                                                                                                                                                                                                                                                                                                                                                                                                                                                                                                                                                                                                                                                                                                                                                                                                                                             | -2.05986 | 0.13459  |          |          |   |          |         |          |   |          |         |          |   |          |         |          |   |          |          |          |   |          |          |          |   |          |          |          |   |          |          |          |   |          |          |          |   |          |         |          |   |          |          |          |   |          |          |         |   |         |          |          |   |         |         |          |   |          |          |          |   |         |          |         |   |         |          |         |   |         |         |         |   |         |          |         |   |         |         |         |   |         |         |         |   |         |         |         |   |          |         |         |   |         |         |         |   |         |          |         |   |          |         |          |   |          |         |          |
| O                                              | -0.66883                                                                                                                                                                                                                                                                                                                                                                                                                                                                                                                                                                                                                                                                                                                                                                                                                                                                                                                                                                                                                                                                                                                                                                                                                                                                                                                                                                                                                                                                                                                                                                                                                                                                                                                                                                                                                                                                                                                                                                                                                                            | 0.36985  | -0.14777 |          |          |   |          |         |          |   |          |         |          |   |          |         |          |   |          |          |          |   |          |          |          |   |          |          |          |   |          |          |          |   |          |          |          |   |          |         |          |   |          |          |          |   |          |          |         |   |         |          |          |   |         |         |          |   |          |          |          |   |         |          |         |   |         |          |         |   |         |         |         |   |         |          |         |   |         |         |         |   |         |         |         |   |         |         |         |   |          |         |         |   |         |         |         |   |         |          |         |   |          |         |          |   |          |         |          |
| C                                              | -0.89358                                                                                                                                                                                                                                                                                                                                                                                                                                                                                                                                                                                                                                                                                                                                                                                                                                                                                                                                                                                                                                                                                                                                                                                                                                                                                                                                                                                                                                                                                                                                                                                                                                                                                                                                                                                                                                                                                                                                                                                                                                            | 1.55311  | -0.93303 |          |          |   |          |         |          |   |          |         |          |   |          |         |          |   |          |          |          |   |          |          |          |   |          |          |          |   |          |          |          |   |          |          |          |   |          |         |          |   |          |          |          |   |          |          |         |   |         |          |          |   |         |         |          |   |          |          |          |   |         |          |         |   |         |          |         |   |         |         |         |   |         |          |         |   |         |         |         |   |         |         |         |   |         |         |         |   |          |         |         |   |         |         |         |   |         |          |         |   |          |         |          |   |          |         |          |

|   |          |          |          |
|---|----------|----------|----------|
| C | -0.15275 | -3.24912 | 2.08691  |
| C | 5.00279  | 1.96993  | -1.05730 |
| O | 5.70793  | 2.97910  | -1.01175 |
| C | 5.57504  | 0.60799  | -0.63341 |
| N | 4.69782  | -0.53042 | -0.77753 |
| C | 4.84017  | -1.39281 | -1.82450 |
| O | 5.71450  | -1.27763 | -2.68644 |
| C | 3.80989  | -2.51260 | -1.86164 |
| N | 3.70615  | 1.96418  | -1.45775 |
| C | 3.00873  | 3.17543  | -1.82813 |
| H | -1.03174 | 2.29517  | 4.03587  |
| H | 0.37996  | 4.23828  | 3.37532  |
| H | 2.44109  | 3.85392  | 2.02709  |
| H | 3.06436  | 1.53115  | 1.35030  |
| H | -0.39892 | 0.00980  | 3.34321  |
| H | -0.03840 | -2.84327 | 3.09628  |
| H | 0.77164  | -3.78701 | 1.85082  |
| H | -0.99774 | -3.94778 | 2.10205  |
| H | -0.06975 | -4.41374 | -0.32311 |
| H | 1.53751  | -1.45175 | 2.67548  |
| H | 0.30026  | -3.10396 | -1.47469 |
| H | -1.24646 | -3.97758 | -1.59069 |
| H | -1.17654 | -1.43133 | 1.51507  |
| H | -8.07226 | -1.65905 | 0.30040  |
| H | -7.97288 | -1.83036 | -1.45327 |
| H | -7.69320 | -3.23813 | -0.41183 |
| H | 2.83065  | -2.08840 | -2.11596 |
| H | 3.71245  | -3.00893 | -0.88849 |
| H | 4.10197  | -3.23211 | -2.63009 |
| H | 3.98463  | -0.69218 | -0.03849 |
| H | 6.47058  | 0.43768  | -1.23669 |
| H | 5.88355  | 0.71202  | 0.41368  |
| H | 3.17799  | 1.09898  | -1.40196 |
| H | 2.49215  | 3.04826  | -2.78686 |
| H | 2.26678  | 3.45968  | -1.06956 |
| H | -5.22382 | 4.92700  | -1.07223 |
| H | -1.89354 | 1.90436  | -0.67706 |
| H | -0.14730 | 2.31202  | -0.68283 |
| H | -6.68719 | 4.34701  | -1.92478 |
| H | -0.82697 | 1.32491  | -2.00028 |
| H | -6.71144 | 4.51036  | -0.16894 |
| H | 3.74973  | 3.97274  | -1.91470 |
| O | 3.29409  | -3.51048 | 1.40488  |
| H | 3.28988  | -2.49367 | 1.45365  |
| H | 4.19519  | -3.74760 | 1.66961  |
| H | -2.88406 | -2.21160 | -0.24301 |
| H | -6.23566 | 1.00023  | -0.72074 |
| H | -3.60379 | 0.22247  | -0.50510 |
| H | -4.94080 | -3.76759 | -0.21127 |

Optimized Molecular Properties for **T3-TS3**

|                                                |                                                                                                                                                                                                                                                                                                                                                                                                                                                                                                                                                                                                                                                                                                                                                                                                                                                                                                                                                                                                                                                                                                                                                                                                                                                                                                                                                                                                                                                                                                                                                                                                                                                                                                                                                                                                                                                                                                                                                                                                                                       |          |          |          |         |   |         |         |          |   |         |         |          |   |         |         |          |   |         |          |         |   |         |          |         |   |         |          |         |   |         |          |         |   |         |          |         |   |         |         |          |   |         |          |         |   |         |          |          |   |          |          |          |   |          |         |          |   |         |          |         |   |          |          |          |   |          |          |         |   |          |          |          |   |          |          |         |   |          |          |          |   |          |          |          |   |          |          |          |   |          |          |          |   |          |          |          |   |         |          |         |   |         |         |          |   |         |         |          |
|------------------------------------------------|---------------------------------------------------------------------------------------------------------------------------------------------------------------------------------------------------------------------------------------------------------------------------------------------------------------------------------------------------------------------------------------------------------------------------------------------------------------------------------------------------------------------------------------------------------------------------------------------------------------------------------------------------------------------------------------------------------------------------------------------------------------------------------------------------------------------------------------------------------------------------------------------------------------------------------------------------------------------------------------------------------------------------------------------------------------------------------------------------------------------------------------------------------------------------------------------------------------------------------------------------------------------------------------------------------------------------------------------------------------------------------------------------------------------------------------------------------------------------------------------------------------------------------------------------------------------------------------------------------------------------------------------------------------------------------------------------------------------------------------------------------------------------------------------------------------------------------------------------------------------------------------------------------------------------------------------------------------------------------------------------------------------------------------|----------|----------|----------|---------|---|---------|---------|----------|---|---------|---------|----------|---|---------|---------|----------|---|---------|----------|---------|---|---------|----------|---------|---|---------|----------|---------|---|---------|----------|---------|---|---------|----------|---------|---|---------|---------|----------|---|---------|----------|---------|---|---------|----------|----------|---|----------|----------|----------|---|----------|---------|----------|---|---------|----------|---------|---|----------|----------|----------|---|----------|----------|---------|---|----------|----------|----------|---|----------|----------|---------|---|----------|----------|----------|---|----------|----------|----------|---|----------|----------|----------|---|----------|----------|----------|---|----------|----------|----------|---|---------|----------|---------|---|---------|---------|----------|---|---------|---------|----------|
| Number of<br>(-)<br>Vibrational<br>Frequencies | 1 (-833.6959)                                                                                                                                                                                                                                                                                                                                                                                                                                                                                                                                                                                                                                                                                                                                                                                                                                                                                                                                                                                                                                                                                                                                                                                                                                                                                                                                                                                                                                                                                                                                                                                                                                                                                                                                                                                                                                                                                                                                                                                                                         |          |          |          |         |   |         |         |          |   |         |         |          |   |         |         |          |   |         |          |         |   |         |          |         |   |         |          |         |   |         |          |         |   |         |          |         |   |         |         |          |   |         |          |         |   |         |          |          |   |          |          |          |   |          |         |          |   |         |          |         |   |          |          |          |   |          |          |         |   |          |          |          |   |          |          |         |   |          |          |          |   |          |          |          |   |          |          |          |   |          |          |          |   |          |          |          |   |         |          |         |   |         |         |          |   |         |         |          |
| Absolute<br>Energies<br>(Hartrees)             | <p><b>B3LYP/6-31G(d)</b></p> <p>There are 22 positive frequencies below 100 cm<sup>-1</sup>.</p> <p>Zero-point correction: 0.627426 hartree<br/>         Enthalpy correction: 0.672902 hartree<br/>         Free Energy correction: 0.540825 hartree<br/>         Quasiharmonic Free Energy correction: 0.557365 hartree</p> <p>SCF Energy: -1834.159136 hartree<br/>         SCF Energy + ZPVE: -1833.531710 hartree<br/>         Enthalpy: -1833.486234 hartree<br/>         Free Energy: -1833.618311 hartree</p> <p>Free Energy with quasiharmonic correction: -1833.601771 hartree<br/>         (correction: 10.38 kcal/mol)</p> <p><b>B3LYP-D3/6-311+G(d,p)</b></p> <p>SCF Done: E(RB3LYP) = -1834.84115776 A.U.</p>                                                                                                                                                                                                                                                                                                                                                                                                                                                                                                                                                                                                                                                                                                                                                                                                                                                                                                                                                                                                                                                                                                                                                                                                                                                                                                            |          |          |          |         |   |         |         |          |   |         |         |          |   |         |         |          |   |         |          |         |   |         |          |         |   |         |          |         |   |         |          |         |   |         |          |         |   |         |         |          |   |         |          |         |   |         |          |          |   |          |          |          |   |          |         |          |   |         |          |         |   |          |          |          |   |          |          |         |   |          |          |          |   |          |          |         |   |          |          |          |   |          |          |          |   |          |          |          |   |          |          |          |   |          |          |          |   |         |          |         |   |         |         |          |   |         |         |          |
| Cartesian<br>Coordinates                       | <p>76</p> <p>spD3-TS3-T3.out Energy: -1151380.2006053</p> <table> <tr><td>O</td><td>1.50959</td><td>-3.02072</td><td>0.42151</td></tr> <tr><td>C</td><td>5.57088</td><td>2.54547</td><td>-1.80538</td></tr> <tr><td>O</td><td>4.48575</td><td>2.03108</td><td>-2.02763</td></tr> <tr><td>O</td><td>6.44216</td><td>2.11803</td><td>-0.89889</td></tr> <tr><td>C</td><td>5.95866</td><td>-0.97077</td><td>1.25286</td></tr> <tr><td>C</td><td>4.98266</td><td>-1.89592</td><td>1.53445</td></tr> <tr><td>N</td><td>5.44410</td><td>-0.03318</td><td>0.37757</td></tr> <tr><td>C</td><td>4.18861</td><td>-0.38836</td><td>0.14516</td></tr> <tr><td>N</td><td>3.86487</td><td>-1.50957</td><td>0.82597</td></tr> <tr><td>C</td><td>6.07734</td><td>3.76858</td><td>-2.54783</td></tr> <tr><td>C</td><td>7.36662</td><td>-0.89651</td><td>1.75496</td></tr> <tr><td>C</td><td>0.66370</td><td>-2.39535</td><td>-0.60620</td></tr> <tr><td>C</td><td>-0.28782</td><td>-0.02065</td><td>-0.64523</td></tr> <tr><td>O</td><td>-1.17795</td><td>0.82098</td><td>-0.59506</td></tr> <tr><td>C</td><td>0.86174</td><td>-3.78891</td><td>1.42434</td></tr> <tr><td>C</td><td>-0.32746</td><td>-1.36344</td><td>-0.04317</td></tr> <tr><td>C</td><td>-1.74618</td><td>-1.85970</td><td>0.34053</td></tr> <tr><td>C</td><td>-2.88039</td><td>-1.76295</td><td>-0.68476</td></tr> <tr><td>O</td><td>-2.21777</td><td>-1.27232</td><td>1.55673</td></tr> <tr><td>C</td><td>-4.19525</td><td>-1.96527</td><td>-0.23572</td></tr> <tr><td>C</td><td>-2.68159</td><td>-1.56878</td><td>-2.05580</td></tr> <tr><td>C</td><td>-5.26907</td><td>-1.98116</td><td>-1.12461</td></tr> <tr><td>C</td><td>-3.75308</td><td>-1.59224</td><td>-2.95267</td></tr> <tr><td>C</td><td>-5.05322</td><td>-1.80042</td><td>-2.49246</td></tr> <tr><td>H</td><td>0.11228</td><td>-1.06971</td><td>1.15058</td></tr> <tr><td>O</td><td>0.92155</td><td>0.29537</td><td>-1.22011</td></tr> <tr><td>C</td><td>1.03920</td><td>1.64264</td><td>-1.69877</td></tr> </table> | O        | 1.50959  | -3.02072 | 0.42151 | C | 5.57088 | 2.54547 | -1.80538 | O | 4.48575 | 2.03108 | -2.02763 | O | 6.44216 | 2.11803 | -0.89889 | C | 5.95866 | -0.97077 | 1.25286 | C | 4.98266 | -1.89592 | 1.53445 | N | 5.44410 | -0.03318 | 0.37757 | C | 4.18861 | -0.38836 | 0.14516 | N | 3.86487 | -1.50957 | 0.82597 | C | 6.07734 | 3.76858 | -2.54783 | C | 7.36662 | -0.89651 | 1.75496 | C | 0.66370 | -2.39535 | -0.60620 | C | -0.28782 | -0.02065 | -0.64523 | O | -1.17795 | 0.82098 | -0.59506 | C | 0.86174 | -3.78891 | 1.42434 | C | -0.32746 | -1.36344 | -0.04317 | C | -1.74618 | -1.85970 | 0.34053 | C | -2.88039 | -1.76295 | -0.68476 | O | -2.21777 | -1.27232 | 1.55673 | C | -4.19525 | -1.96527 | -0.23572 | C | -2.68159 | -1.56878 | -2.05580 | C | -5.26907 | -1.98116 | -1.12461 | C | -3.75308 | -1.59224 | -2.95267 | C | -5.05322 | -1.80042 | -2.49246 | H | 0.11228 | -1.06971 | 1.15058 | O | 0.92155 | 0.29537 | -1.22011 | C | 1.03920 | 1.64264 | -1.69877 |
| O                                              | 1.50959                                                                                                                                                                                                                                                                                                                                                                                                                                                                                                                                                                                                                                                                                                                                                                                                                                                                                                                                                                                                                                                                                                                                                                                                                                                                                                                                                                                                                                                                                                                                                                                                                                                                                                                                                                                                                                                                                                                                                                                                                               | -3.02072 | 0.42151  |          |         |   |         |         |          |   |         |         |          |   |         |         |          |   |         |          |         |   |         |          |         |   |         |          |         |   |         |          |         |   |         |          |         |   |         |         |          |   |         |          |         |   |         |          |          |   |          |          |          |   |          |         |          |   |         |          |         |   |          |          |          |   |          |          |         |   |          |          |          |   |          |          |         |   |          |          |          |   |          |          |          |   |          |          |          |   |          |          |          |   |          |          |          |   |         |          |         |   |         |         |          |   |         |         |          |
| C                                              | 5.57088                                                                                                                                                                                                                                                                                                                                                                                                                                                                                                                                                                                                                                                                                                                                                                                                                                                                                                                                                                                                                                                                                                                                                                                                                                                                                                                                                                                                                                                                                                                                                                                                                                                                                                                                                                                                                                                                                                                                                                                                                               | 2.54547  | -1.80538 |          |         |   |         |         |          |   |         |         |          |   |         |         |          |   |         |          |         |   |         |          |         |   |         |          |         |   |         |          |         |   |         |          |         |   |         |         |          |   |         |          |         |   |         |          |          |   |          |          |          |   |          |         |          |   |         |          |         |   |          |          |          |   |          |          |         |   |          |          |          |   |          |          |         |   |          |          |          |   |          |          |          |   |          |          |          |   |          |          |          |   |          |          |          |   |         |          |         |   |         |         |          |   |         |         |          |
| O                                              | 4.48575                                                                                                                                                                                                                                                                                                                                                                                                                                                                                                                                                                                                                                                                                                                                                                                                                                                                                                                                                                                                                                                                                                                                                                                                                                                                                                                                                                                                                                                                                                                                                                                                                                                                                                                                                                                                                                                                                                                                                                                                                               | 2.03108  | -2.02763 |          |         |   |         |         |          |   |         |         |          |   |         |         |          |   |         |          |         |   |         |          |         |   |         |          |         |   |         |          |         |   |         |          |         |   |         |         |          |   |         |          |         |   |         |          |          |   |          |          |          |   |          |         |          |   |         |          |         |   |          |          |          |   |          |          |         |   |          |          |          |   |          |          |         |   |          |          |          |   |          |          |          |   |          |          |          |   |          |          |          |   |          |          |          |   |         |          |         |   |         |         |          |   |         |         |          |
| O                                              | 6.44216                                                                                                                                                                                                                                                                                                                                                                                                                                                                                                                                                                                                                                                                                                                                                                                                                                                                                                                                                                                                                                                                                                                                                                                                                                                                                                                                                                                                                                                                                                                                                                                                                                                                                                                                                                                                                                                                                                                                                                                                                               | 2.11803  | -0.89889 |          |         |   |         |         |          |   |         |         |          |   |         |         |          |   |         |          |         |   |         |          |         |   |         |          |         |   |         |          |         |   |         |          |         |   |         |         |          |   |         |          |         |   |         |          |          |   |          |          |          |   |          |         |          |   |         |          |         |   |          |          |          |   |          |          |         |   |          |          |          |   |          |          |         |   |          |          |          |   |          |          |          |   |          |          |          |   |          |          |          |   |          |          |          |   |         |          |         |   |         |         |          |   |         |         |          |
| C                                              | 5.95866                                                                                                                                                                                                                                                                                                                                                                                                                                                                                                                                                                                                                                                                                                                                                                                                                                                                                                                                                                                                                                                                                                                                                                                                                                                                                                                                                                                                                                                                                                                                                                                                                                                                                                                                                                                                                                                                                                                                                                                                                               | -0.97077 | 1.25286  |          |         |   |         |         |          |   |         |         |          |   |         |         |          |   |         |          |         |   |         |          |         |   |         |          |         |   |         |          |         |   |         |          |         |   |         |         |          |   |         |          |         |   |         |          |          |   |          |          |          |   |          |         |          |   |         |          |         |   |          |          |          |   |          |          |         |   |          |          |          |   |          |          |         |   |          |          |          |   |          |          |          |   |          |          |          |   |          |          |          |   |          |          |          |   |         |          |         |   |         |         |          |   |         |         |          |
| C                                              | 4.98266                                                                                                                                                                                                                                                                                                                                                                                                                                                                                                                                                                                                                                                                                                                                                                                                                                                                                                                                                                                                                                                                                                                                                                                                                                                                                                                                                                                                                                                                                                                                                                                                                                                                                                                                                                                                                                                                                                                                                                                                                               | -1.89592 | 1.53445  |          |         |   |         |         |          |   |         |         |          |   |         |         |          |   |         |          |         |   |         |          |         |   |         |          |         |   |         |          |         |   |         |          |         |   |         |         |          |   |         |          |         |   |         |          |          |   |          |          |          |   |          |         |          |   |         |          |         |   |          |          |          |   |          |          |         |   |          |          |          |   |          |          |         |   |          |          |          |   |          |          |          |   |          |          |          |   |          |          |          |   |          |          |          |   |         |          |         |   |         |         |          |   |         |         |          |
| N                                              | 5.44410                                                                                                                                                                                                                                                                                                                                                                                                                                                                                                                                                                                                                                                                                                                                                                                                                                                                                                                                                                                                                                                                                                                                                                                                                                                                                                                                                                                                                                                                                                                                                                                                                                                                                                                                                                                                                                                                                                                                                                                                                               | -0.03318 | 0.37757  |          |         |   |         |         |          |   |         |         |          |   |         |         |          |   |         |          |         |   |         |          |         |   |         |          |         |   |         |          |         |   |         |          |         |   |         |         |          |   |         |          |         |   |         |          |          |   |          |          |          |   |          |         |          |   |         |          |         |   |          |          |          |   |          |          |         |   |          |          |          |   |          |          |         |   |          |          |          |   |          |          |          |   |          |          |          |   |          |          |          |   |          |          |          |   |         |          |         |   |         |         |          |   |         |         |          |
| C                                              | 4.18861                                                                                                                                                                                                                                                                                                                                                                                                                                                                                                                                                                                                                                                                                                                                                                                                                                                                                                                                                                                                                                                                                                                                                                                                                                                                                                                                                                                                                                                                                                                                                                                                                                                                                                                                                                                                                                                                                                                                                                                                                               | -0.38836 | 0.14516  |          |         |   |         |         |          |   |         |         |          |   |         |         |          |   |         |          |         |   |         |          |         |   |         |          |         |   |         |          |         |   |         |          |         |   |         |         |          |   |         |          |         |   |         |          |          |   |          |          |          |   |          |         |          |   |         |          |         |   |          |          |          |   |          |          |         |   |          |          |          |   |          |          |         |   |          |          |          |   |          |          |          |   |          |          |          |   |          |          |          |   |          |          |          |   |         |          |         |   |         |         |          |   |         |         |          |
| N                                              | 3.86487                                                                                                                                                                                                                                                                                                                                                                                                                                                                                                                                                                                                                                                                                                                                                                                                                                                                                                                                                                                                                                                                                                                                                                                                                                                                                                                                                                                                                                                                                                                                                                                                                                                                                                                                                                                                                                                                                                                                                                                                                               | -1.50957 | 0.82597  |          |         |   |         |         |          |   |         |         |          |   |         |         |          |   |         |          |         |   |         |          |         |   |         |          |         |   |         |          |         |   |         |          |         |   |         |         |          |   |         |          |         |   |         |          |          |   |          |          |          |   |          |         |          |   |         |          |         |   |          |          |          |   |          |          |         |   |          |          |          |   |          |          |         |   |          |          |          |   |          |          |          |   |          |          |          |   |          |          |          |   |          |          |          |   |         |          |         |   |         |         |          |   |         |         |          |
| C                                              | 6.07734                                                                                                                                                                                                                                                                                                                                                                                                                                                                                                                                                                                                                                                                                                                                                                                                                                                                                                                                                                                                                                                                                                                                                                                                                                                                                                                                                                                                                                                                                                                                                                                                                                                                                                                                                                                                                                                                                                                                                                                                                               | 3.76858  | -2.54783 |          |         |   |         |         |          |   |         |         |          |   |         |         |          |   |         |          |         |   |         |          |         |   |         |          |         |   |         |          |         |   |         |          |         |   |         |         |          |   |         |          |         |   |         |          |          |   |          |          |          |   |          |         |          |   |         |          |         |   |          |          |          |   |          |          |         |   |          |          |          |   |          |          |         |   |          |          |          |   |          |          |          |   |          |          |          |   |          |          |          |   |          |          |          |   |         |          |         |   |         |         |          |   |         |         |          |
| C                                              | 7.36662                                                                                                                                                                                                                                                                                                                                                                                                                                                                                                                                                                                                                                                                                                                                                                                                                                                                                                                                                                                                                                                                                                                                                                                                                                                                                                                                                                                                                                                                                                                                                                                                                                                                                                                                                                                                                                                                                                                                                                                                                               | -0.89651 | 1.75496  |          |         |   |         |         |          |   |         |         |          |   |         |         |          |   |         |          |         |   |         |          |         |   |         |          |         |   |         |          |         |   |         |          |         |   |         |         |          |   |         |          |         |   |         |          |          |   |          |          |          |   |          |         |          |   |         |          |         |   |          |          |          |   |          |          |         |   |          |          |          |   |          |          |         |   |          |          |          |   |          |          |          |   |          |          |          |   |          |          |          |   |          |          |          |   |         |          |         |   |         |         |          |   |         |         |          |
| C                                              | 0.66370                                                                                                                                                                                                                                                                                                                                                                                                                                                                                                                                                                                                                                                                                                                                                                                                                                                                                                                                                                                                                                                                                                                                                                                                                                                                                                                                                                                                                                                                                                                                                                                                                                                                                                                                                                                                                                                                                                                                                                                                                               | -2.39535 | -0.60620 |          |         |   |         |         |          |   |         |         |          |   |         |         |          |   |         |          |         |   |         |          |         |   |         |          |         |   |         |          |         |   |         |          |         |   |         |         |          |   |         |          |         |   |         |          |          |   |          |          |          |   |          |         |          |   |         |          |         |   |          |          |          |   |          |          |         |   |          |          |          |   |          |          |         |   |          |          |          |   |          |          |          |   |          |          |          |   |          |          |          |   |          |          |          |   |         |          |         |   |         |         |          |   |         |         |          |
| C                                              | -0.28782                                                                                                                                                                                                                                                                                                                                                                                                                                                                                                                                                                                                                                                                                                                                                                                                                                                                                                                                                                                                                                                                                                                                                                                                                                                                                                                                                                                                                                                                                                                                                                                                                                                                                                                                                                                                                                                                                                                                                                                                                              | -0.02065 | -0.64523 |          |         |   |         |         |          |   |         |         |          |   |         |         |          |   |         |          |         |   |         |          |         |   |         |          |         |   |         |          |         |   |         |          |         |   |         |         |          |   |         |          |         |   |         |          |          |   |          |          |          |   |          |         |          |   |         |          |         |   |          |          |          |   |          |          |         |   |          |          |          |   |          |          |         |   |          |          |          |   |          |          |          |   |          |          |          |   |          |          |          |   |          |          |          |   |         |          |         |   |         |         |          |   |         |         |          |
| O                                              | -1.17795                                                                                                                                                                                                                                                                                                                                                                                                                                                                                                                                                                                                                                                                                                                                                                                                                                                                                                                                                                                                                                                                                                                                                                                                                                                                                                                                                                                                                                                                                                                                                                                                                                                                                                                                                                                                                                                                                                                                                                                                                              | 0.82098  | -0.59506 |          |         |   |         |         |          |   |         |         |          |   |         |         |          |   |         |          |         |   |         |          |         |   |         |          |         |   |         |          |         |   |         |          |         |   |         |         |          |   |         |          |         |   |         |          |          |   |          |          |          |   |          |         |          |   |         |          |         |   |          |          |          |   |          |          |         |   |          |          |          |   |          |          |         |   |          |          |          |   |          |          |          |   |          |          |          |   |          |          |          |   |          |          |          |   |         |          |         |   |         |         |          |   |         |         |          |
| C                                              | 0.86174                                                                                                                                                                                                                                                                                                                                                                                                                                                                                                                                                                                                                                                                                                                                                                                                                                                                                                                                                                                                                                                                                                                                                                                                                                                                                                                                                                                                                                                                                                                                                                                                                                                                                                                                                                                                                                                                                                                                                                                                                               | -3.78891 | 1.42434  |          |         |   |         |         |          |   |         |         |          |   |         |         |          |   |         |          |         |   |         |          |         |   |         |          |         |   |         |          |         |   |         |          |         |   |         |         |          |   |         |          |         |   |         |          |          |   |          |          |          |   |          |         |          |   |         |          |         |   |          |          |          |   |          |          |         |   |          |          |          |   |          |          |         |   |          |          |          |   |          |          |          |   |          |          |          |   |          |          |          |   |          |          |          |   |         |          |         |   |         |         |          |   |         |         |          |
| C                                              | -0.32746                                                                                                                                                                                                                                                                                                                                                                                                                                                                                                                                                                                                                                                                                                                                                                                                                                                                                                                                                                                                                                                                                                                                                                                                                                                                                                                                                                                                                                                                                                                                                                                                                                                                                                                                                                                                                                                                                                                                                                                                                              | -1.36344 | -0.04317 |          |         |   |         |         |          |   |         |         |          |   |         |         |          |   |         |          |         |   |         |          |         |   |         |          |         |   |         |          |         |   |         |          |         |   |         |         |          |   |         |          |         |   |         |          |          |   |          |          |          |   |          |         |          |   |         |          |         |   |          |          |          |   |          |          |         |   |          |          |          |   |          |          |         |   |          |          |          |   |          |          |          |   |          |          |          |   |          |          |          |   |          |          |          |   |         |          |         |   |         |         |          |   |         |         |          |
| C                                              | -1.74618                                                                                                                                                                                                                                                                                                                                                                                                                                                                                                                                                                                                                                                                                                                                                                                                                                                                                                                                                                                                                                                                                                                                                                                                                                                                                                                                                                                                                                                                                                                                                                                                                                                                                                                                                                                                                                                                                                                                                                                                                              | -1.85970 | 0.34053  |          |         |   |         |         |          |   |         |         |          |   |         |         |          |   |         |          |         |   |         |          |         |   |         |          |         |   |         |          |         |   |         |          |         |   |         |         |          |   |         |          |         |   |         |          |          |   |          |          |          |   |          |         |          |   |         |          |         |   |          |          |          |   |          |          |         |   |          |          |          |   |          |          |         |   |          |          |          |   |          |          |          |   |          |          |          |   |          |          |          |   |          |          |          |   |         |          |         |   |         |         |          |   |         |         |          |
| C                                              | -2.88039                                                                                                                                                                                                                                                                                                                                                                                                                                                                                                                                                                                                                                                                                                                                                                                                                                                                                                                                                                                                                                                                                                                                                                                                                                                                                                                                                                                                                                                                                                                                                                                                                                                                                                                                                                                                                                                                                                                                                                                                                              | -1.76295 | -0.68476 |          |         |   |         |         |          |   |         |         |          |   |         |         |          |   |         |          |         |   |         |          |         |   |         |          |         |   |         |          |         |   |         |          |         |   |         |         |          |   |         |          |         |   |         |          |          |   |          |          |          |   |          |         |          |   |         |          |         |   |          |          |          |   |          |          |         |   |          |          |          |   |          |          |         |   |          |          |          |   |          |          |          |   |          |          |          |   |          |          |          |   |          |          |          |   |         |          |         |   |         |         |          |   |         |         |          |
| O                                              | -2.21777                                                                                                                                                                                                                                                                                                                                                                                                                                                                                                                                                                                                                                                                                                                                                                                                                                                                                                                                                                                                                                                                                                                                                                                                                                                                                                                                                                                                                                                                                                                                                                                                                                                                                                                                                                                                                                                                                                                                                                                                                              | -1.27232 | 1.55673  |          |         |   |         |         |          |   |         |         |          |   |         |         |          |   |         |          |         |   |         |          |         |   |         |          |         |   |         |          |         |   |         |          |         |   |         |         |          |   |         |          |         |   |         |          |          |   |          |          |          |   |          |         |          |   |         |          |         |   |          |          |          |   |          |          |         |   |          |          |          |   |          |          |         |   |          |          |          |   |          |          |          |   |          |          |          |   |          |          |          |   |          |          |          |   |         |          |         |   |         |         |          |   |         |         |          |
| C                                              | -4.19525                                                                                                                                                                                                                                                                                                                                                                                                                                                                                                                                                                                                                                                                                                                                                                                                                                                                                                                                                                                                                                                                                                                                                                                                                                                                                                                                                                                                                                                                                                                                                                                                                                                                                                                                                                                                                                                                                                                                                                                                                              | -1.96527 | -0.23572 |          |         |   |         |         |          |   |         |         |          |   |         |         |          |   |         |          |         |   |         |          |         |   |         |          |         |   |         |          |         |   |         |          |         |   |         |         |          |   |         |          |         |   |         |          |          |   |          |          |          |   |          |         |          |   |         |          |         |   |          |          |          |   |          |          |         |   |          |          |          |   |          |          |         |   |          |          |          |   |          |          |          |   |          |          |          |   |          |          |          |   |          |          |          |   |         |          |         |   |         |         |          |   |         |         |          |
| C                                              | -2.68159                                                                                                                                                                                                                                                                                                                                                                                                                                                                                                                                                                                                                                                                                                                                                                                                                                                                                                                                                                                                                                                                                                                                                                                                                                                                                                                                                                                                                                                                                                                                                                                                                                                                                                                                                                                                                                                                                                                                                                                                                              | -1.56878 | -2.05580 |          |         |   |         |         |          |   |         |         |          |   |         |         |          |   |         |          |         |   |         |          |         |   |         |          |         |   |         |          |         |   |         |          |         |   |         |         |          |   |         |          |         |   |         |          |          |   |          |          |          |   |          |         |          |   |         |          |         |   |          |          |          |   |          |          |         |   |          |          |          |   |          |          |         |   |          |          |          |   |          |          |          |   |          |          |          |   |          |          |          |   |          |          |          |   |         |          |         |   |         |         |          |   |         |         |          |
| C                                              | -5.26907                                                                                                                                                                                                                                                                                                                                                                                                                                                                                                                                                                                                                                                                                                                                                                                                                                                                                                                                                                                                                                                                                                                                                                                                                                                                                                                                                                                                                                                                                                                                                                                                                                                                                                                                                                                                                                                                                                                                                                                                                              | -1.98116 | -1.12461 |          |         |   |         |         |          |   |         |         |          |   |         |         |          |   |         |          |         |   |         |          |         |   |         |          |         |   |         |          |         |   |         |          |         |   |         |         |          |   |         |          |         |   |         |          |          |   |          |          |          |   |          |         |          |   |         |          |         |   |          |          |          |   |          |          |         |   |          |          |          |   |          |          |         |   |          |          |          |   |          |          |          |   |          |          |          |   |          |          |          |   |          |          |          |   |         |          |         |   |         |         |          |   |         |         |          |
| C                                              | -3.75308                                                                                                                                                                                                                                                                                                                                                                                                                                                                                                                                                                                                                                                                                                                                                                                                                                                                                                                                                                                                                                                                                                                                                                                                                                                                                                                                                                                                                                                                                                                                                                                                                                                                                                                                                                                                                                                                                                                                                                                                                              | -1.59224 | -2.95267 |          |         |   |         |         |          |   |         |         |          |   |         |         |          |   |         |          |         |   |         |          |         |   |         |          |         |   |         |          |         |   |         |          |         |   |         |         |          |   |         |          |         |   |         |          |          |   |          |          |          |   |          |         |          |   |         |          |         |   |          |          |          |   |          |          |         |   |          |          |          |   |          |          |         |   |          |          |          |   |          |          |          |   |          |          |          |   |          |          |          |   |          |          |          |   |         |          |         |   |         |         |          |   |         |         |          |
| C                                              | -5.05322                                                                                                                                                                                                                                                                                                                                                                                                                                                                                                                                                                                                                                                                                                                                                                                                                                                                                                                                                                                                                                                                                                                                                                                                                                                                                                                                                                                                                                                                                                                                                                                                                                                                                                                                                                                                                                                                                                                                                                                                                              | -1.80042 | -2.49246 |          |         |   |         |         |          |   |         |         |          |   |         |         |          |   |         |          |         |   |         |          |         |   |         |          |         |   |         |          |         |   |         |          |         |   |         |         |          |   |         |          |         |   |         |          |          |   |          |          |          |   |          |         |          |   |         |          |         |   |          |          |          |   |          |          |         |   |          |          |          |   |          |          |         |   |          |          |          |   |          |          |          |   |          |          |          |   |          |          |          |   |          |          |          |   |         |          |         |   |         |         |          |   |         |         |          |
| H                                              | 0.11228                                                                                                                                                                                                                                                                                                                                                                                                                                                                                                                                                                                                                                                                                                                                                                                                                                                                                                                                                                                                                                                                                                                                                                                                                                                                                                                                                                                                                                                                                                                                                                                                                                                                                                                                                                                                                                                                                                                                                                                                                               | -1.06971 | 1.15058  |          |         |   |         |         |          |   |         |         |          |   |         |         |          |   |         |          |         |   |         |          |         |   |         |          |         |   |         |          |         |   |         |          |         |   |         |         |          |   |         |          |         |   |         |          |          |   |          |          |          |   |          |         |          |   |         |          |         |   |          |          |          |   |          |          |         |   |          |          |          |   |          |          |         |   |          |          |          |   |          |          |          |   |          |          |          |   |          |          |          |   |          |          |          |   |         |          |         |   |         |         |          |   |         |         |          |
| O                                              | 0.92155                                                                                                                                                                                                                                                                                                                                                                                                                                                                                                                                                                                                                                                                                                                                                                                                                                                                                                                                                                                                                                                                                                                                                                                                                                                                                                                                                                                                                                                                                                                                                                                                                                                                                                                                                                                                                                                                                                                                                                                                                               | 0.29537  | -1.22011 |          |         |   |         |         |          |   |         |         |          |   |         |         |          |   |         |          |         |   |         |          |         |   |         |          |         |   |         |          |         |   |         |          |         |   |         |         |          |   |         |          |         |   |         |          |          |   |          |          |          |   |          |         |          |   |         |          |         |   |          |          |          |   |          |          |         |   |          |          |          |   |          |          |         |   |          |          |          |   |          |          |          |   |          |          |          |   |          |          |          |   |          |          |          |   |         |          |         |   |         |         |          |   |         |         |          |
| C                                              | 1.03920                                                                                                                                                                                                                                                                                                                                                                                                                                                                                                                                                                                                                                                                                                                                                                                                                                                                                                                                                                                                                                                                                                                                                                                                                                                                                                                                                                                                                                                                                                                                                                                                                                                                                                                                                                                                                                                                                                                                                                                                                               | 1.64264  | -1.69877 |          |         |   |         |         |          |   |         |         |          |   |         |         |          |   |         |          |         |   |         |          |         |   |         |          |         |   |         |          |         |   |         |          |         |   |         |         |          |   |         |          |         |   |         |          |          |   |          |          |          |   |          |         |          |   |         |          |         |   |          |          |          |   |          |          |         |   |          |          |          |   |          |          |         |   |          |          |          |   |          |          |          |   |          |          |          |   |          |          |          |   |          |          |          |   |         |          |         |   |         |         |          |   |         |         |          |

|   |          |          |          |
|---|----------|----------|----------|
| C | 0.11370  | -3.50425 | -1.51494 |
| C | -4.93255 | 1.99323  | 0.41986  |
| O | -6.12390 | 2.23407  | 0.21566  |
| C | -4.46186 | 1.62700  | 1.83774  |
| N | -3.03503 | 1.53279  | 2.04513  |
| C | -2.32396 | 2.58252  | 2.55643  |
| O | -2.85874 | 3.63043  | 2.92311  |
| C | -0.81863 | 2.38233  | 2.60754  |
| N | -3.97150 | 2.01582  | -0.53500 |
| C | -4.27880 | 2.26714  | -1.92635 |
| H | -3.56747 | -1.43615 | -4.01340 |
| H | -5.88898 | -1.81080 | -3.18822 |
| H | -6.27836 | -2.12877 | -0.74727 |
| H | -4.36357 | -2.09852 | 0.82786  |
| H | -1.68281 | -1.37952 | -2.43423 |
| H | -0.26634 | -3.07509 | -2.44591 |
| H | -0.70686 | -4.06979 | -1.06323 |
| H | 0.92035  | -4.20361 | -1.76370 |
| H | 0.26170  | -4.60181 | 0.99311  |
| H | -1.63369 | -2.94338 | 0.52593  |
| H | 0.23145  | -3.16359 | 2.06528  |
| H | 1.65655  | -4.23806 | 2.03075  |
| H | 1.41026  | -1.85019 | -1.18391 |
| H | 2.96165  | -2.00343 | 0.78270  |
| H | 4.98678  | -2.77262 | 2.16501  |
| H | 8.08864  | -0.92945 | 0.92930  |
| H | 7.54699  | 0.03646  | 2.30349  |
| H | 7.58523  | -1.73169 | 2.42877  |
| H | 3.50148  | 0.13570  | -0.50259 |
| H | 6.06435  | 1.29832  | -0.40939 |
| H | -0.39137 | 2.73290  | 1.65932  |
| H | -0.51076 | 1.33772  | 2.73846  |
| H | -0.41547 | 3.00661  | 3.40981  |
| H | -2.57196 | 0.65972  | 1.78377  |
| H | -4.85933 | 2.39328  | 2.50710  |
| H | -4.93519 | 0.67130  | 2.09142  |
| H | -3.03644 | 1.69307  | -0.30416 |
| H | -3.66337 | 3.08592  | -2.32130 |
| H | -4.10454 | 1.37255  | -2.53632 |
| H | 5.35749  | 4.06334  | -3.31288 |
| H | 2.06449  | 1.74581  | -2.05535 |
| H | 0.32404  | 1.82878  | -2.50669 |
| H | 6.22658  | 4.59431  | -1.84334 |
| H | 0.84283  | 2.35578  | -0.89332 |
| H | 7.04812  | 3.55526  | -3.00797 |
| H | -5.33275 | 2.54540  | -1.98817 |
| O | 0.10143  | -0.77394 | 2.47262  |
| H | 0.77046  | -1.28547 | 2.95168  |
| H | -1.40603 | -1.19081 | 2.15789  |

Optimized Molecular Properties for **T3-INT3**

|                                                |                                                                                                                                                                                                                                                                                                                                                                                                                                                                                                                                                                                                                                                                                                                            |                          |                   |
|------------------------------------------------|----------------------------------------------------------------------------------------------------------------------------------------------------------------------------------------------------------------------------------------------------------------------------------------------------------------------------------------------------------------------------------------------------------------------------------------------------------------------------------------------------------------------------------------------------------------------------------------------------------------------------------------------------------------------------------------------------------------------------|--------------------------|-------------------|
| Number of<br>(-)<br>Vibrational<br>Frequencies | 0                                                                                                                                                                                                                                                                                                                                                                                                                                                                                                                                                                                                                                                                                                                          |                          |                   |
| Absolute<br>Energies<br>(Hartrees)             | <p><b>B3LYP/6-31G(d)</b></p> <p>There are 23 positive frequencies below 100 cm<sup>-1</sup>.</p> <p>Zero-point correction: 0.631005 hartree<br/>         Enthalpy correction: 0.677772 hartree<br/>         Free Energy correction: 0.542723 hartree<br/>         Quasiharmonic Free Energy correction: 0.559581 hartree</p> <p>SCF Energy: -1834.180549 hartree<br/>         SCF Energy + ZPVE: -1833.549544 hartree<br/>         Enthalpy: -1833.502777 hartree<br/>         Free Energy: -1833.637826 hartree</p> <p>Free Energy with quasiharmonic correction: -1833.620968 hartree<br/>         (correction: 10.58 kcal/mol)</p> <p><b>B3LYP-D3/6-311+G(d,p)</b></p> <p>SCF Done: E(RB3LYP) = -1834.86371608 A.U.</p> |                          |                   |
| Cartesian<br>Coordinates                       | 76<br>spD3-INT3-T3.out                                                                                                                                                                                                                                                                                                                                                                                                                                                                                                                                                                                                                                                                                                     | Energy: -1151394.3561647 |                   |
|                                                | O                                                                                                                                                                                                                                                                                                                                                                                                                                                                                                                                                                                                                                                                                                                          | 1.57733                  | -2.37664 0.83421  |
|                                                | C                                                                                                                                                                                                                                                                                                                                                                                                                                                                                                                                                                                                                                                                                                                          | 5.74225                  | 3.05246 -1.03892  |
|                                                | O                                                                                                                                                                                                                                                                                                                                                                                                                                                                                                                                                                                                                                                                                                                          | 4.57200                  | 2.75030 -0.86899  |
|                                                | O                                                                                                                                                                                                                                                                                                                                                                                                                                                                                                                                                                                                                                                                                                                          | 6.77408                  | 2.24294 -0.82082  |
|                                                | C                                                                                                                                                                                                                                                                                                                                                                                                                                                                                                                                                                                                                                                                                                                          | 6.42882                  | -1.34708 0.41202  |
|                                                | C                                                                                                                                                                                                                                                                                                                                                                                                                                                                                                                                                                                                                                                                                                                          | 5.43070                  | -2.22937 0.74942  |
|                                                | N                                                                                                                                                                                                                                                                                                                                                                                                                                                                                                                                                                                                                                                                                                                          | 5.85502                  | -0.14665 0.03845  |
|                                                | C                                                                                                                                                                                                                                                                                                                                                                                                                                                                                                                                                                                                                                                                                                                          | 4.54411                  | -0.30846 0.15151  |
|                                                | N                                                                                                                                                                                                                                                                                                                                                                                                                                                                                                                                                                                                                                                                                                                          | 4.24097                  | -1.55403 0.57998  |
|                                                | C                                                                                                                                                                                                                                                                                                                                                                                                                                                                                                                                                                                                                                                                                                                          | 6.18555                  | 4.41798 -1.53071  |
|                                                | C                                                                                                                                                                                                                                                                                                                                                                                                                                                                                                                                                                                                                                                                                                                          | 7.91179                  | -1.54982 0.41358  |
|                                                | C                                                                                                                                                                                                                                                                                                                                                                                                                                                                                                                                                                                                                                                                                                                          | 0.85999                  | -2.01187 -0.51249 |
|                                                | C                                                                                                                                                                                                                                                                                                                                                                                                                                                                                                                                                                                                                                                                                                                          | -0.31445                 | 0.17780 -0.29232  |
|                                                | O                                                                                                                                                                                                                                                                                                                                                                                                                                                                                                                                                                                                                                                                                                                          | -1.25050                 | 0.98036 -0.08607  |
|                                                | C                                                                                                                                                                                                                                                                                                                                                                                                                                                                                                                                                                                                                                                                                                                          | 1.10035                  | -3.51193 1.54130  |
|                                                | C                                                                                                                                                                                                                                                                                                                                                                                                                                                                                                                                                                                                                                                                                                                          | -0.37297                 | -1.23050 -0.32787 |
|                                                | C                                                                                                                                                                                                                                                                                                                                                                                                                                                                                                                                                                                                                                                                                                                          | -1.66617                 | -1.90459 0.05100  |
|                                                | C                                                                                                                                                                                                                                                                                                                                                                                                                                                                                                                                                                                                                                                                                                                          | -2.85160                 | -1.74877 -0.90455 |
|                                                | O                                                                                                                                                                                                                                                                                                                                                                                                                                                                                                                                                                                                                                                                                                                          | -2.14265                 | -1.57043 1.38722  |
|                                                | C                                                                                                                                                                                                                                                                                                                                                                                                                                                                                                                                                                                                                                                                                                                          | -4.14573                 | -2.08847 -0.48205 |
|                                                | C                                                                                                                                                                                                                                                                                                                                                                                                                                                                                                                                                                                                                                                                                                                          | -2.66578                 | -1.38413 -2.24180 |
|                                                | C                                                                                                                                                                                                                                                                                                                                                                                                                                                                                                                                                                                                                                                                                                                          | -5.22267                 | -2.05109 -1.36888 |
|                                                | C                                                                                                                                                                                                                                                                                                                                                                                                                                                                                                                                                                                                                                                                                                                          | -3.74037                 | -1.34878 -3.13292 |
|                                                | C                                                                                                                                                                                                                                                                                                                                                                                                                                                                                                                                                                                                                                                                                                                          | -5.02507                 | -1.68078 -2.70096 |
|                                                | O                                                                                                                                                                                                                                                                                                                                                                                                                                                                                                                                                                                                                                                                                                                          | 0.96941                  | 0.71199 -0.49070  |
|                                                | C                                                                                                                                                                                                                                                                                                                                                                                                                                                                                                                                                                                                                                                                                                                          | 1.02567                  | 2.12978 -0.62795  |
|                                                | C                                                                                                                                                                                                                                                                                                                                                                                                                                                                                                                                                                                                                                                                                                                          | 0.79072                  | -3.28508 -1.35594 |



|   |          |          |          |
|---|----------|----------|----------|
| C | -5.16048 | 1.68577  | -0.18854 |
| O | -6.22305 | 2.00753  | -0.72462 |
| C | -5.17743 | 1.01927  | 1.19886  |
| N | -3.90609 | 0.90365  | 1.88223  |
| C | -3.47159 | 1.89467  | 2.71385  |
| O | -4.16820 | 2.85270  | 3.04559  |
| C | -2.03431 | 1.73734  | 3.18958  |
| N | -3.94929 | 1.87224  | -0.75574 |
| C | -3.83958 | 2.42851  | -2.08803 |
| H | -3.57309 | -1.05271 | -4.16660 |
| H | -5.86497 | -1.64418 | -3.39057 |
| H | -6.22023 | -2.30727 | -1.01857 |
| H | -4.30080 | -2.37764 | 0.55305  |
| H | -1.66497 | -1.11786 | -2.56897 |
| H | 0.52533  | -3.00968 | -2.38187 |
| H | 0.03582  | -3.99668 | -1.00642 |
| H | 1.76042  | -3.79810 | -1.37868 |
| H | 1.29191  | -4.44889 | 0.99957  |
| H | -1.46887 | -2.98977 | 0.06151  |
| H | 0.02684  | -3.43527 | 1.75453  |
| H | 1.63512  | -3.54538 | 2.49681  |
| H | 1.62879  | -1.36442 | -0.93046 |
| H | 8.33784  | -1.39594 | -0.58584 |
| H | 8.41200  | -0.84416 | 1.08873  |
| H | 8.16639  | -2.56471 | 0.73684  |
| H | -1.36912 | 1.89589  | 2.33186  |
| H | -1.84267 | 0.73509  | 3.58724  |
| H | -1.83167 | 2.48427  | 3.95926  |
| H | -3.26608 | 0.15118  | 1.61771  |
| H | -5.85023 | 1.61248  | 1.82137  |
| H | -5.61690 | 0.02426  | 1.07160  |
| H | -3.10295 | 1.48492  | -0.33938 |
| H | -2.77837 | 2.54677  | -2.31963 |
| H | -4.30083 | 1.77406  | -2.83877 |
| H | 5.31419  | 5.05274  | -1.69799 |
| H | 2.07763  | 2.37731  | -0.78498 |
| H | 0.42742  | 2.47161  | -1.48094 |
| H | 6.84970  | 4.88329  | -0.79419 |
| H | 0.65031  | 2.63654  | 0.26766  |
| H | 6.75502  | 4.31374  | -2.46072 |
| H | -4.33704 | 3.40347  | -2.14153 |
| O | 0.29268  | -0.72001 | 2.76246  |
| H | 3.28658  | -1.92225 | 0.72988  |
| H | 5.46462  | -3.25406 | 1.08901  |
| H | 3.80245  | 0.44506  | -0.07181 |
| H | 6.43537  | 1.33343  | -0.49182 |
| H | 0.83700  | -1.11968 | 2.04786  |
| H | 0.12792  | 0.17872  | 2.43747  |
| H | -1.34338 | -1.34960 | 1.91394  |

Optimized Molecular Properties for **T3-TS4**

|                                                |                                                                                                                                                                                                                                                                                                                                                                                                                                                                                                                                                                                                                                                                                                                                                                                                                                                                                                                                                                                                                                                                                                                                                                                                                                                                                                                                                                                                                                                                                                                                                                                                                                                                                                                                                                                                                                                                                                                                                                                                                                        |          |          |          |         |   |         |         |          |   |         |         |          |   |         |         |          |   |         |          |         |   |         |          |         |   |         |          |         |   |         |          |         |   |         |          |         |   |         |         |          |   |         |          |         |   |         |          |          |   |          |         |          |   |          |         |          |   |         |          |         |   |          |          |          |   |          |          |          |   |          |          |          |   |          |          |         |   |          |          |          |   |          |          |          |   |          |          |          |   |          |          |          |   |          |          |          |   |         |         |          |   |         |         |          |   |         |          |          |
|------------------------------------------------|----------------------------------------------------------------------------------------------------------------------------------------------------------------------------------------------------------------------------------------------------------------------------------------------------------------------------------------------------------------------------------------------------------------------------------------------------------------------------------------------------------------------------------------------------------------------------------------------------------------------------------------------------------------------------------------------------------------------------------------------------------------------------------------------------------------------------------------------------------------------------------------------------------------------------------------------------------------------------------------------------------------------------------------------------------------------------------------------------------------------------------------------------------------------------------------------------------------------------------------------------------------------------------------------------------------------------------------------------------------------------------------------------------------------------------------------------------------------------------------------------------------------------------------------------------------------------------------------------------------------------------------------------------------------------------------------------------------------------------------------------------------------------------------------------------------------------------------------------------------------------------------------------------------------------------------------------------------------------------------------------------------------------------------|----------|----------|----------|---------|---|---------|---------|----------|---|---------|---------|----------|---|---------|---------|----------|---|---------|----------|---------|---|---------|----------|---------|---|---------|----------|---------|---|---------|----------|---------|---|---------|----------|---------|---|---------|---------|----------|---|---------|----------|---------|---|---------|----------|----------|---|----------|---------|----------|---|----------|---------|----------|---|---------|----------|---------|---|----------|----------|----------|---|----------|----------|----------|---|----------|----------|----------|---|----------|----------|---------|---|----------|----------|----------|---|----------|----------|----------|---|----------|----------|----------|---|----------|----------|----------|---|----------|----------|----------|---|---------|---------|----------|---|---------|---------|----------|---|---------|----------|----------|
| Number of<br>(-)<br>Vibrational<br>Frequencies | 1 (-208.6407)                                                                                                                                                                                                                                                                                                                                                                                                                                                                                                                                                                                                                                                                                                                                                                                                                                                                                                                                                                                                                                                                                                                                                                                                                                                                                                                                                                                                                                                                                                                                                                                                                                                                                                                                                                                                                                                                                                                                                                                                                          |          |          |          |         |   |         |         |          |   |         |         |          |   |         |         |          |   |         |          |         |   |         |          |         |   |         |          |         |   |         |          |         |   |         |          |         |   |         |         |          |   |         |          |         |   |         |          |          |   |          |         |          |   |          |         |          |   |         |          |         |   |          |          |          |   |          |          |          |   |          |          |          |   |          |          |         |   |          |          |          |   |          |          |          |   |          |          |          |   |          |          |          |   |          |          |          |   |         |         |          |   |         |         |          |   |         |          |          |
| Absolute<br>Energies<br>(Hartrees)             | <p><b>B3LYP/6-31G(d)</b></p> <p>There are 22 positive frequencies below 100 cm<sup>-1</sup>.</p> <p>Zero-point correction: 0.629438 hartree<br/>         Enthalpy correction: 0.675734 hartree<br/>         Free Energy correction: 0.542074 hartree<br/>         Quasiharmonic Free Energy correction: 0.558272 hartree</p> <p>SCF Energy: -1834.179218 hartree<br/>         SCF Energy + ZPVE: -1833.549780 hartree<br/>         Enthalpy: -1833.503484 hartree<br/>         Free Energy: -1833.637144 hartree</p> <p>Free Energy with quasiharmonic correction: -1833.620946 hartree<br/>         (correction: 10.16 kcal/mol)</p> <p><b>B3LYP-D3/6-311+G(d,p)</b></p> <p>SCF Done: E(RB3LYP) = -1834.86221556 A.U.</p>                                                                                                                                                                                                                                                                                                                                                                                                                                                                                                                                                                                                                                                                                                                                                                                                                                                                                                                                                                                                                                                                                                                                                                                                                                                                                                             |          |          |          |         |   |         |         |          |   |         |         |          |   |         |         |          |   |         |          |         |   |         |          |         |   |         |          |         |   |         |          |         |   |         |          |         |   |         |         |          |   |         |          |         |   |         |          |          |   |          |         |          |   |          |         |          |   |         |          |         |   |          |          |          |   |          |          |          |   |          |          |          |   |          |          |         |   |          |          |          |   |          |          |          |   |          |          |          |   |          |          |          |   |          |          |          |   |         |         |          |   |         |         |          |   |         |          |          |
| Cartesian<br>Coordinates                       | <p>76</p> <p>spD3-TS4-T3.out Energy: -1151393.4145742</p> <table> <tr><td>O</td><td>1.63548</td><td>-2.42888</td><td>0.84964</td></tr> <tr><td>C</td><td>5.68619</td><td>3.07273</td><td>-1.09612</td></tr> <tr><td>O</td><td>4.51250</td><td>2.77115</td><td>-0.94608</td></tr> <tr><td>O</td><td>6.71486</td><td>2.27423</td><td>-0.83609</td></tr> <tr><td>C</td><td>6.40008</td><td>-1.27137</td><td>0.47769</td></tr> <tr><td>C</td><td>5.41092</td><td>-2.16506</td><td>0.81395</td></tr> <tr><td>N</td><td>5.81073</td><td>-0.09417</td><td>0.05873</td></tr> <tr><td>C</td><td>4.50025</td><td>-0.28398</td><td>0.14569</td></tr> <tr><td>N</td><td>4.21122</td><td>-1.52281</td><td>0.59869</td></tr> <tr><td>C</td><td>6.13455</td><td>4.42852</td><td>-1.61139</td></tr> <tr><td>C</td><td>7.88651</td><td>-1.44226</td><td>0.52202</td></tr> <tr><td>C</td><td>0.80195</td><td>-1.95616</td><td>-0.66271</td></tr> <tr><td>C</td><td>-0.31122</td><td>0.21988</td><td>-0.30140</td></tr> <tr><td>O</td><td>-1.25234</td><td>1.00148</td><td>-0.08614</td></tr> <tr><td>C</td><td>1.36179</td><td>-3.70521</td><td>1.38053</td></tr> <tr><td>C</td><td>-0.37930</td><td>-1.20215</td><td>-0.40516</td></tr> <tr><td>C</td><td>-1.68327</td><td>-1.88095</td><td>-0.04755</td></tr> <tr><td>C</td><td>-2.84875</td><td>-1.69989</td><td>-1.02076</td></tr> <tr><td>O</td><td>-2.16747</td><td>-1.55522</td><td>1.27543</td></tr> <tr><td>C</td><td>-4.15576</td><td>-2.00884</td><td>-0.61552</td></tr> <tr><td>C</td><td>-2.63685</td><td>-1.33286</td><td>-2.35364</td></tr> <tr><td>C</td><td>-5.22023</td><td>-1.93931</td><td>-1.51490</td></tr> <tr><td>C</td><td>-3.69899</td><td>-1.26755</td><td>-3.25805</td></tr> <tr><td>C</td><td>-4.99677</td><td>-1.56864</td><td>-2.84287</td></tr> <tr><td>O</td><td>0.96417</td><td>0.74946</td><td>-0.46682</td></tr> <tr><td>C</td><td>1.03547</td><td>2.17559</td><td>-0.50921</td></tr> <tr><td>C</td><td>0.75955</td><td>-3.25511</td><td>-1.44484</td></tr> </table> | O        | 1.63548  | -2.42888 | 0.84964 | C | 5.68619 | 3.07273 | -1.09612 | O | 4.51250 | 2.77115 | -0.94608 | O | 6.71486 | 2.27423 | -0.83609 | C | 6.40008 | -1.27137 | 0.47769 | C | 5.41092 | -2.16506 | 0.81395 | N | 5.81073 | -0.09417 | 0.05873 | C | 4.50025 | -0.28398 | 0.14569 | N | 4.21122 | -1.52281 | 0.59869 | C | 6.13455 | 4.42852 | -1.61139 | C | 7.88651 | -1.44226 | 0.52202 | C | 0.80195 | -1.95616 | -0.66271 | C | -0.31122 | 0.21988 | -0.30140 | O | -1.25234 | 1.00148 | -0.08614 | C | 1.36179 | -3.70521 | 1.38053 | C | -0.37930 | -1.20215 | -0.40516 | C | -1.68327 | -1.88095 | -0.04755 | C | -2.84875 | -1.69989 | -1.02076 | O | -2.16747 | -1.55522 | 1.27543 | C | -4.15576 | -2.00884 | -0.61552 | C | -2.63685 | -1.33286 | -2.35364 | C | -5.22023 | -1.93931 | -1.51490 | C | -3.69899 | -1.26755 | -3.25805 | C | -4.99677 | -1.56864 | -2.84287 | O | 0.96417 | 0.74946 | -0.46682 | C | 1.03547 | 2.17559 | -0.50921 | C | 0.75955 | -3.25511 | -1.44484 |
| O                                              | 1.63548                                                                                                                                                                                                                                                                                                                                                                                                                                                                                                                                                                                                                                                                                                                                                                                                                                                                                                                                                                                                                                                                                                                                                                                                                                                                                                                                                                                                                                                                                                                                                                                                                                                                                                                                                                                                                                                                                                                                                                                                                                | -2.42888 | 0.84964  |          |         |   |         |         |          |   |         |         |          |   |         |         |          |   |         |          |         |   |         |          |         |   |         |          |         |   |         |          |         |   |         |          |         |   |         |         |          |   |         |          |         |   |         |          |          |   |          |         |          |   |          |         |          |   |         |          |         |   |          |          |          |   |          |          |          |   |          |          |          |   |          |          |         |   |          |          |          |   |          |          |          |   |          |          |          |   |          |          |          |   |          |          |          |   |         |         |          |   |         |         |          |   |         |          |          |
| C                                              | 5.68619                                                                                                                                                                                                                                                                                                                                                                                                                                                                                                                                                                                                                                                                                                                                                                                                                                                                                                                                                                                                                                                                                                                                                                                                                                                                                                                                                                                                                                                                                                                                                                                                                                                                                                                                                                                                                                                                                                                                                                                                                                | 3.07273  | -1.09612 |          |         |   |         |         |          |   |         |         |          |   |         |         |          |   |         |          |         |   |         |          |         |   |         |          |         |   |         |          |         |   |         |          |         |   |         |         |          |   |         |          |         |   |         |          |          |   |          |         |          |   |          |         |          |   |         |          |         |   |          |          |          |   |          |          |          |   |          |          |          |   |          |          |         |   |          |          |          |   |          |          |          |   |          |          |          |   |          |          |          |   |          |          |          |   |         |         |          |   |         |         |          |   |         |          |          |
| O                                              | 4.51250                                                                                                                                                                                                                                                                                                                                                                                                                                                                                                                                                                                                                                                                                                                                                                                                                                                                                                                                                                                                                                                                                                                                                                                                                                                                                                                                                                                                                                                                                                                                                                                                                                                                                                                                                                                                                                                                                                                                                                                                                                | 2.77115  | -0.94608 |          |         |   |         |         |          |   |         |         |          |   |         |         |          |   |         |          |         |   |         |          |         |   |         |          |         |   |         |          |         |   |         |          |         |   |         |         |          |   |         |          |         |   |         |          |          |   |          |         |          |   |          |         |          |   |         |          |         |   |          |          |          |   |          |          |          |   |          |          |          |   |          |          |         |   |          |          |          |   |          |          |          |   |          |          |          |   |          |          |          |   |          |          |          |   |         |         |          |   |         |         |          |   |         |          |          |
| O                                              | 6.71486                                                                                                                                                                                                                                                                                                                                                                                                                                                                                                                                                                                                                                                                                                                                                                                                                                                                                                                                                                                                                                                                                                                                                                                                                                                                                                                                                                                                                                                                                                                                                                                                                                                                                                                                                                                                                                                                                                                                                                                                                                | 2.27423  | -0.83609 |          |         |   |         |         |          |   |         |         |          |   |         |         |          |   |         |          |         |   |         |          |         |   |         |          |         |   |         |          |         |   |         |          |         |   |         |         |          |   |         |          |         |   |         |          |          |   |          |         |          |   |          |         |          |   |         |          |         |   |          |          |          |   |          |          |          |   |          |          |          |   |          |          |         |   |          |          |          |   |          |          |          |   |          |          |          |   |          |          |          |   |          |          |          |   |         |         |          |   |         |         |          |   |         |          |          |
| C                                              | 6.40008                                                                                                                                                                                                                                                                                                                                                                                                                                                                                                                                                                                                                                                                                                                                                                                                                                                                                                                                                                                                                                                                                                                                                                                                                                                                                                                                                                                                                                                                                                                                                                                                                                                                                                                                                                                                                                                                                                                                                                                                                                | -1.27137 | 0.47769  |          |         |   |         |         |          |   |         |         |          |   |         |         |          |   |         |          |         |   |         |          |         |   |         |          |         |   |         |          |         |   |         |          |         |   |         |         |          |   |         |          |         |   |         |          |          |   |          |         |          |   |          |         |          |   |         |          |         |   |          |          |          |   |          |          |          |   |          |          |          |   |          |          |         |   |          |          |          |   |          |          |          |   |          |          |          |   |          |          |          |   |          |          |          |   |         |         |          |   |         |         |          |   |         |          |          |
| C                                              | 5.41092                                                                                                                                                                                                                                                                                                                                                                                                                                                                                                                                                                                                                                                                                                                                                                                                                                                                                                                                                                                                                                                                                                                                                                                                                                                                                                                                                                                                                                                                                                                                                                                                                                                                                                                                                                                                                                                                                                                                                                                                                                | -2.16506 | 0.81395  |          |         |   |         |         |          |   |         |         |          |   |         |         |          |   |         |          |         |   |         |          |         |   |         |          |         |   |         |          |         |   |         |          |         |   |         |         |          |   |         |          |         |   |         |          |          |   |          |         |          |   |          |         |          |   |         |          |         |   |          |          |          |   |          |          |          |   |          |          |          |   |          |          |         |   |          |          |          |   |          |          |          |   |          |          |          |   |          |          |          |   |          |          |          |   |         |         |          |   |         |         |          |   |         |          |          |
| N                                              | 5.81073                                                                                                                                                                                                                                                                                                                                                                                                                                                                                                                                                                                                                                                                                                                                                                                                                                                                                                                                                                                                                                                                                                                                                                                                                                                                                                                                                                                                                                                                                                                                                                                                                                                                                                                                                                                                                                                                                                                                                                                                                                | -0.09417 | 0.05873  |          |         |   |         |         |          |   |         |         |          |   |         |         |          |   |         |          |         |   |         |          |         |   |         |          |         |   |         |          |         |   |         |          |         |   |         |         |          |   |         |          |         |   |         |          |          |   |          |         |          |   |          |         |          |   |         |          |         |   |          |          |          |   |          |          |          |   |          |          |          |   |          |          |         |   |          |          |          |   |          |          |          |   |          |          |          |   |          |          |          |   |          |          |          |   |         |         |          |   |         |         |          |   |         |          |          |
| C                                              | 4.50025                                                                                                                                                                                                                                                                                                                                                                                                                                                                                                                                                                                                                                                                                                                                                                                                                                                                                                                                                                                                                                                                                                                                                                                                                                                                                                                                                                                                                                                                                                                                                                                                                                                                                                                                                                                                                                                                                                                                                                                                                                | -0.28398 | 0.14569  |          |         |   |         |         |          |   |         |         |          |   |         |         |          |   |         |          |         |   |         |          |         |   |         |          |         |   |         |          |         |   |         |          |         |   |         |         |          |   |         |          |         |   |         |          |          |   |          |         |          |   |          |         |          |   |         |          |         |   |          |          |          |   |          |          |          |   |          |          |          |   |          |          |         |   |          |          |          |   |          |          |          |   |          |          |          |   |          |          |          |   |          |          |          |   |         |         |          |   |         |         |          |   |         |          |          |
| N                                              | 4.21122                                                                                                                                                                                                                                                                                                                                                                                                                                                                                                                                                                                                                                                                                                                                                                                                                                                                                                                                                                                                                                                                                                                                                                                                                                                                                                                                                                                                                                                                                                                                                                                                                                                                                                                                                                                                                                                                                                                                                                                                                                | -1.52281 | 0.59869  |          |         |   |         |         |          |   |         |         |          |   |         |         |          |   |         |          |         |   |         |          |         |   |         |          |         |   |         |          |         |   |         |          |         |   |         |         |          |   |         |          |         |   |         |          |          |   |          |         |          |   |          |         |          |   |         |          |         |   |          |          |          |   |          |          |          |   |          |          |          |   |          |          |         |   |          |          |          |   |          |          |          |   |          |          |          |   |          |          |          |   |          |          |          |   |         |         |          |   |         |         |          |   |         |          |          |
| C                                              | 6.13455                                                                                                                                                                                                                                                                                                                                                                                                                                                                                                                                                                                                                                                                                                                                                                                                                                                                                                                                                                                                                                                                                                                                                                                                                                                                                                                                                                                                                                                                                                                                                                                                                                                                                                                                                                                                                                                                                                                                                                                                                                | 4.42852  | -1.61139 |          |         |   |         |         |          |   |         |         |          |   |         |         |          |   |         |          |         |   |         |          |         |   |         |          |         |   |         |          |         |   |         |          |         |   |         |         |          |   |         |          |         |   |         |          |          |   |          |         |          |   |          |         |          |   |         |          |         |   |          |          |          |   |          |          |          |   |          |          |          |   |          |          |         |   |          |          |          |   |          |          |          |   |          |          |          |   |          |          |          |   |          |          |          |   |         |         |          |   |         |         |          |   |         |          |          |
| C                                              | 7.88651                                                                                                                                                                                                                                                                                                                                                                                                                                                                                                                                                                                                                                                                                                                                                                                                                                                                                                                                                                                                                                                                                                                                                                                                                                                                                                                                                                                                                                                                                                                                                                                                                                                                                                                                                                                                                                                                                                                                                                                                                                | -1.44226 | 0.52202  |          |         |   |         |         |          |   |         |         |          |   |         |         |          |   |         |          |         |   |         |          |         |   |         |          |         |   |         |          |         |   |         |          |         |   |         |         |          |   |         |          |         |   |         |          |          |   |          |         |          |   |          |         |          |   |         |          |         |   |          |          |          |   |          |          |          |   |          |          |          |   |          |          |         |   |          |          |          |   |          |          |          |   |          |          |          |   |          |          |          |   |          |          |          |   |         |         |          |   |         |         |          |   |         |          |          |
| C                                              | 0.80195                                                                                                                                                                                                                                                                                                                                                                                                                                                                                                                                                                                                                                                                                                                                                                                                                                                                                                                                                                                                                                                                                                                                                                                                                                                                                                                                                                                                                                                                                                                                                                                                                                                                                                                                                                                                                                                                                                                                                                                                                                | -1.95616 | -0.66271 |          |         |   |         |         |          |   |         |         |          |   |         |         |          |   |         |          |         |   |         |          |         |   |         |          |         |   |         |          |         |   |         |          |         |   |         |         |          |   |         |          |         |   |         |          |          |   |          |         |          |   |          |         |          |   |         |          |         |   |          |          |          |   |          |          |          |   |          |          |          |   |          |          |         |   |          |          |          |   |          |          |          |   |          |          |          |   |          |          |          |   |          |          |          |   |         |         |          |   |         |         |          |   |         |          |          |
| C                                              | -0.31122                                                                                                                                                                                                                                                                                                                                                                                                                                                                                                                                                                                                                                                                                                                                                                                                                                                                                                                                                                                                                                                                                                                                                                                                                                                                                                                                                                                                                                                                                                                                                                                                                                                                                                                                                                                                                                                                                                                                                                                                                               | 0.21988  | -0.30140 |          |         |   |         |         |          |   |         |         |          |   |         |         |          |   |         |          |         |   |         |          |         |   |         |          |         |   |         |          |         |   |         |          |         |   |         |         |          |   |         |          |         |   |         |          |          |   |          |         |          |   |          |         |          |   |         |          |         |   |          |          |          |   |          |          |          |   |          |          |          |   |          |          |         |   |          |          |          |   |          |          |          |   |          |          |          |   |          |          |          |   |          |          |          |   |         |         |          |   |         |         |          |   |         |          |          |
| O                                              | -1.25234                                                                                                                                                                                                                                                                                                                                                                                                                                                                                                                                                                                                                                                                                                                                                                                                                                                                                                                                                                                                                                                                                                                                                                                                                                                                                                                                                                                                                                                                                                                                                                                                                                                                                                                                                                                                                                                                                                                                                                                                                               | 1.00148  | -0.08614 |          |         |   |         |         |          |   |         |         |          |   |         |         |          |   |         |          |         |   |         |          |         |   |         |          |         |   |         |          |         |   |         |          |         |   |         |         |          |   |         |          |         |   |         |          |          |   |          |         |          |   |          |         |          |   |         |          |         |   |          |          |          |   |          |          |          |   |          |          |          |   |          |          |         |   |          |          |          |   |          |          |          |   |          |          |          |   |          |          |          |   |          |          |          |   |         |         |          |   |         |         |          |   |         |          |          |
| C                                              | 1.36179                                                                                                                                                                                                                                                                                                                                                                                                                                                                                                                                                                                                                                                                                                                                                                                                                                                                                                                                                                                                                                                                                                                                                                                                                                                                                                                                                                                                                                                                                                                                                                                                                                                                                                                                                                                                                                                                                                                                                                                                                                | -3.70521 | 1.38053  |          |         |   |         |         |          |   |         |         |          |   |         |         |          |   |         |          |         |   |         |          |         |   |         |          |         |   |         |          |         |   |         |          |         |   |         |         |          |   |         |          |         |   |         |          |          |   |          |         |          |   |          |         |          |   |         |          |         |   |          |          |          |   |          |          |          |   |          |          |          |   |          |          |         |   |          |          |          |   |          |          |          |   |          |          |          |   |          |          |          |   |          |          |          |   |         |         |          |   |         |         |          |   |         |          |          |
| C                                              | -0.37930                                                                                                                                                                                                                                                                                                                                                                                                                                                                                                                                                                                                                                                                                                                                                                                                                                                                                                                                                                                                                                                                                                                                                                                                                                                                                                                                                                                                                                                                                                                                                                                                                                                                                                                                                                                                                                                                                                                                                                                                                               | -1.20215 | -0.40516 |          |         |   |         |         |          |   |         |         |          |   |         |         |          |   |         |          |         |   |         |          |         |   |         |          |         |   |         |          |         |   |         |          |         |   |         |         |          |   |         |          |         |   |         |          |          |   |          |         |          |   |          |         |          |   |         |          |         |   |          |          |          |   |          |          |          |   |          |          |          |   |          |          |         |   |          |          |          |   |          |          |          |   |          |          |          |   |          |          |          |   |          |          |          |   |         |         |          |   |         |         |          |   |         |          |          |
| C                                              | -1.68327                                                                                                                                                                                                                                                                                                                                                                                                                                                                                                                                                                                                                                                                                                                                                                                                                                                                                                                                                                                                                                                                                                                                                                                                                                                                                                                                                                                                                                                                                                                                                                                                                                                                                                                                                                                                                                                                                                                                                                                                                               | -1.88095 | -0.04755 |          |         |   |         |         |          |   |         |         |          |   |         |         |          |   |         |          |         |   |         |          |         |   |         |          |         |   |         |          |         |   |         |          |         |   |         |         |          |   |         |          |         |   |         |          |          |   |          |         |          |   |          |         |          |   |         |          |         |   |          |          |          |   |          |          |          |   |          |          |          |   |          |          |         |   |          |          |          |   |          |          |          |   |          |          |          |   |          |          |          |   |          |          |          |   |         |         |          |   |         |         |          |   |         |          |          |
| C                                              | -2.84875                                                                                                                                                                                                                                                                                                                                                                                                                                                                                                                                                                                                                                                                                                                                                                                                                                                                                                                                                                                                                                                                                                                                                                                                                                                                                                                                                                                                                                                                                                                                                                                                                                                                                                                                                                                                                                                                                                                                                                                                                               | -1.69989 | -1.02076 |          |         |   |         |         |          |   |         |         |          |   |         |         |          |   |         |          |         |   |         |          |         |   |         |          |         |   |         |          |         |   |         |          |         |   |         |         |          |   |         |          |         |   |         |          |          |   |          |         |          |   |          |         |          |   |         |          |         |   |          |          |          |   |          |          |          |   |          |          |          |   |          |          |         |   |          |          |          |   |          |          |          |   |          |          |          |   |          |          |          |   |          |          |          |   |         |         |          |   |         |         |          |   |         |          |          |
| O                                              | -2.16747                                                                                                                                                                                                                                                                                                                                                                                                                                                                                                                                                                                                                                                                                                                                                                                                                                                                                                                                                                                                                                                                                                                                                                                                                                                                                                                                                                                                                                                                                                                                                                                                                                                                                                                                                                                                                                                                                                                                                                                                                               | -1.55522 | 1.27543  |          |         |   |         |         |          |   |         |         |          |   |         |         |          |   |         |          |         |   |         |          |         |   |         |          |         |   |         |          |         |   |         |          |         |   |         |         |          |   |         |          |         |   |         |          |          |   |          |         |          |   |          |         |          |   |         |          |         |   |          |          |          |   |          |          |          |   |          |          |          |   |          |          |         |   |          |          |          |   |          |          |          |   |          |          |          |   |          |          |          |   |          |          |          |   |         |         |          |   |         |         |          |   |         |          |          |
| C                                              | -4.15576                                                                                                                                                                                                                                                                                                                                                                                                                                                                                                                                                                                                                                                                                                                                                                                                                                                                                                                                                                                                                                                                                                                                                                                                                                                                                                                                                                                                                                                                                                                                                                                                                                                                                                                                                                                                                                                                                                                                                                                                                               | -2.00884 | -0.61552 |          |         |   |         |         |          |   |         |         |          |   |         |         |          |   |         |          |         |   |         |          |         |   |         |          |         |   |         |          |         |   |         |          |         |   |         |         |          |   |         |          |         |   |         |          |          |   |          |         |          |   |          |         |          |   |         |          |         |   |          |          |          |   |          |          |          |   |          |          |          |   |          |          |         |   |          |          |          |   |          |          |          |   |          |          |          |   |          |          |          |   |          |          |          |   |         |         |          |   |         |         |          |   |         |          |          |
| C                                              | -2.63685                                                                                                                                                                                                                                                                                                                                                                                                                                                                                                                                                                                                                                                                                                                                                                                                                                                                                                                                                                                                                                                                                                                                                                                                                                                                                                                                                                                                                                                                                                                                                                                                                                                                                                                                                                                                                                                                                                                                                                                                                               | -1.33286 | -2.35364 |          |         |   |         |         |          |   |         |         |          |   |         |         |          |   |         |          |         |   |         |          |         |   |         |          |         |   |         |          |         |   |         |          |         |   |         |         |          |   |         |          |         |   |         |          |          |   |          |         |          |   |          |         |          |   |         |          |         |   |          |          |          |   |          |          |          |   |          |          |          |   |          |          |         |   |          |          |          |   |          |          |          |   |          |          |          |   |          |          |          |   |          |          |          |   |         |         |          |   |         |         |          |   |         |          |          |
| C                                              | -5.22023                                                                                                                                                                                                                                                                                                                                                                                                                                                                                                                                                                                                                                                                                                                                                                                                                                                                                                                                                                                                                                                                                                                                                                                                                                                                                                                                                                                                                                                                                                                                                                                                                                                                                                                                                                                                                                                                                                                                                                                                                               | -1.93931 | -1.51490 |          |         |   |         |         |          |   |         |         |          |   |         |         |          |   |         |          |         |   |         |          |         |   |         |          |         |   |         |          |         |   |         |          |         |   |         |         |          |   |         |          |         |   |         |          |          |   |          |         |          |   |          |         |          |   |         |          |         |   |          |          |          |   |          |          |          |   |          |          |          |   |          |          |         |   |          |          |          |   |          |          |          |   |          |          |          |   |          |          |          |   |          |          |          |   |         |         |          |   |         |         |          |   |         |          |          |
| C                                              | -3.69899                                                                                                                                                                                                                                                                                                                                                                                                                                                                                                                                                                                                                                                                                                                                                                                                                                                                                                                                                                                                                                                                                                                                                                                                                                                                                                                                                                                                                                                                                                                                                                                                                                                                                                                                                                                                                                                                                                                                                                                                                               | -1.26755 | -3.25805 |          |         |   |         |         |          |   |         |         |          |   |         |         |          |   |         |          |         |   |         |          |         |   |         |          |         |   |         |          |         |   |         |          |         |   |         |         |          |   |         |          |         |   |         |          |          |   |          |         |          |   |          |         |          |   |         |          |         |   |          |          |          |   |          |          |          |   |          |          |          |   |          |          |         |   |          |          |          |   |          |          |          |   |          |          |          |   |          |          |          |   |          |          |          |   |         |         |          |   |         |         |          |   |         |          |          |
| C                                              | -4.99677                                                                                                                                                                                                                                                                                                                                                                                                                                                                                                                                                                                                                                                                                                                                                                                                                                                                                                                                                                                                                                                                                                                                                                                                                                                                                                                                                                                                                                                                                                                                                                                                                                                                                                                                                                                                                                                                                                                                                                                                                               | -1.56864 | -2.84287 |          |         |   |         |         |          |   |         |         |          |   |         |         |          |   |         |          |         |   |         |          |         |   |         |          |         |   |         |          |         |   |         |          |         |   |         |         |          |   |         |          |         |   |         |          |          |   |          |         |          |   |          |         |          |   |         |          |         |   |          |          |          |   |          |          |          |   |          |          |          |   |          |          |         |   |          |          |          |   |          |          |          |   |          |          |          |   |          |          |          |   |          |          |          |   |         |         |          |   |         |         |          |   |         |          |          |
| O                                              | 0.96417                                                                                                                                                                                                                                                                                                                                                                                                                                                                                                                                                                                                                                                                                                                                                                                                                                                                                                                                                                                                                                                                                                                                                                                                                                                                                                                                                                                                                                                                                                                                                                                                                                                                                                                                                                                                                                                                                                                                                                                                                                | 0.74946  | -0.46682 |          |         |   |         |         |          |   |         |         |          |   |         |         |          |   |         |          |         |   |         |          |         |   |         |          |         |   |         |          |         |   |         |          |         |   |         |         |          |   |         |          |         |   |         |          |          |   |          |         |          |   |          |         |          |   |         |          |         |   |          |          |          |   |          |          |          |   |          |          |          |   |          |          |         |   |          |          |          |   |          |          |          |   |          |          |          |   |          |          |          |   |          |          |          |   |         |         |          |   |         |         |          |   |         |          |          |
| C                                              | 1.03547                                                                                                                                                                                                                                                                                                                                                                                                                                                                                                                                                                                                                                                                                                                                                                                                                                                                                                                                                                                                                                                                                                                                                                                                                                                                                                                                                                                                                                                                                                                                                                                                                                                                                                                                                                                                                                                                                                                                                                                                                                | 2.17559  | -0.50921 |          |         |   |         |         |          |   |         |         |          |   |         |         |          |   |         |          |         |   |         |          |         |   |         |          |         |   |         |          |         |   |         |          |         |   |         |         |          |   |         |          |         |   |         |          |          |   |          |         |          |   |          |         |          |   |         |          |         |   |          |          |          |   |          |          |          |   |          |          |          |   |          |          |         |   |          |          |          |   |          |          |          |   |          |          |          |   |          |          |          |   |          |          |          |   |         |         |          |   |         |         |          |   |         |          |          |
| C                                              | 0.75955                                                                                                                                                                                                                                                                                                                                                                                                                                                                                                                                                                                                                                                                                                                                                                                                                                                                                                                                                                                                                                                                                                                                                                                                                                                                                                                                                                                                                                                                                                                                                                                                                                                                                                                                                                                                                                                                                                                                                                                                                                | -3.25511 | -1.44484 |          |         |   |         |         |          |   |         |         |          |   |         |         |          |   |         |          |         |   |         |          |         |   |         |          |         |   |         |          |         |   |         |          |         |   |         |         |          |   |         |          |         |   |         |          |          |   |          |         |          |   |          |         |          |   |         |          |         |   |          |          |          |   |          |          |          |   |          |          |          |   |          |          |         |   |          |          |          |   |          |          |          |   |          |          |          |   |          |          |          |   |          |          |          |   |         |         |          |   |         |         |          |   |         |          |          |

|   |          |          |          |
|---|----------|----------|----------|
| C | -5.18589 | 1.69691  | -0.04247 |
| O | -6.26806 | 2.01043  | -0.54231 |
| C | -5.15127 | 1.00999  | 1.33410  |
| N | -3.85279 | 0.85345  | 1.95422  |
| C | -3.38181 | 1.78176  | 2.83654  |
| O | -4.05223 | 2.72817  | 3.24655  |
| C | -1.93829 | 1.56454  | 3.27062  |
| N | -3.99432 | 1.91301  | -0.64057 |
| C | -3.92999 | 2.48627  | -1.96901 |
| H | -3.51127 | -0.97202 | -4.28831 |
| H | -5.82683 | -1.50852 | -3.54267 |
| H | -6.22823 | -2.16991 | -1.17755 |
| H | -4.32930 | -2.29933 | 0.41601  |
| H | -1.62730 | -1.08752 | -2.67091 |
| H | 0.45798  | -3.03252 | -2.47547 |
| H | 0.04180  | -3.97886 | -1.04734 |
| H | 1.74572  | -3.73039 | -1.47590 |
| H | 1.76106  | -4.52214 | 0.75724  |
| H | -1.48363 | -2.96587 | -0.05002 |
| H | 0.28122  | -3.87536 | 1.51084  |
| H | 1.82467  | -3.78415 | 2.37528  |
| H | 1.62514  | -1.32989 | -0.99106 |
| H | 8.33607  | -1.30803 | -0.47008 |
| H | 8.35527  | -0.70778 | 1.18916  |
| H | 8.15326  | -2.44210 | 0.88078  |
| H | -1.28504 | 1.70939  | 2.40174  |
| H | -1.77770 | 0.54939  | 3.64951  |
| H | -1.69070 | 2.29047  | 4.04718  |
| H | -3.23538 | 0.10161  | 1.63576  |
| H | -5.77782 | 1.60800  | 1.99922  |
| H | -5.62400 | 0.02909  | 1.21203  |
| H | -3.13539 | 1.53043  | -0.25044 |
| H | -2.87821 | 2.63113  | -2.22697 |
| H | -4.39545 | 1.83006  | -2.71532 |
| H | 5.26476  | 5.05601  | -1.81150 |
| H | 2.08227  | 2.41969  | -0.69796 |
| H | 0.40088  | 2.57859  | -1.30591 |
| H | 6.78231  | 4.91383  | -0.87319 |
| H | 0.70895  | 2.61852  | 0.43796  |
| H | 6.72301  | 4.30436  | -2.52707 |
| H | -4.44988 | 3.45033  | -1.99760 |
| O | 0.19837  | -1.09183 | 2.75397  |
| H | 3.25054  | -1.91303 | 0.73682  |
| H | 5.45891  | -3.17933 | 1.18239  |
| H | 3.74959  | 0.44861  | -0.11337 |
| H | 6.37501  | 1.36695  | -0.49059 |
| H | 0.79163  | -1.47008 | 2.05107  |
| H | 0.19873  | -0.14117 | 2.56538  |
| H | -1.37199 | -1.47765 | 1.85509  |

Optimized Molecular Properties for **T3-product**

|                                                |                                                                                                                                                                                                                                                                                                                                                                                                                                                                                                                                                                                                                                                                                                                            |                                                                                                                                                                                                                                                                                                                                                                                                                                                                                                                                                                                                                                                                                                                                                                                                                                                                                                                                                                                                                                                                                                                                                     |  |
|------------------------------------------------|----------------------------------------------------------------------------------------------------------------------------------------------------------------------------------------------------------------------------------------------------------------------------------------------------------------------------------------------------------------------------------------------------------------------------------------------------------------------------------------------------------------------------------------------------------------------------------------------------------------------------------------------------------------------------------------------------------------------------|-----------------------------------------------------------------------------------------------------------------------------------------------------------------------------------------------------------------------------------------------------------------------------------------------------------------------------------------------------------------------------------------------------------------------------------------------------------------------------------------------------------------------------------------------------------------------------------------------------------------------------------------------------------------------------------------------------------------------------------------------------------------------------------------------------------------------------------------------------------------------------------------------------------------------------------------------------------------------------------------------------------------------------------------------------------------------------------------------------------------------------------------------------|--|
| Number of<br>(-)<br>Vibrational<br>Frequencies | 0                                                                                                                                                                                                                                                                                                                                                                                                                                                                                                                                                                                                                                                                                                                          |                                                                                                                                                                                                                                                                                                                                                                                                                                                                                                                                                                                                                                                                                                                                                                                                                                                                                                                                                                                                                                                                                                                                                     |  |
| Absolute<br>Energies<br>(Hartrees)             | <p><b>B3LYP/6-31G(d)</b></p> <p>There are 28 positive frequencies below 100 cm<sup>-1</sup>.</p> <p>Zero-point correction: 0.628800 hartree<br/>         Enthalpy correction: 0.676832 hartree<br/>         Free Energy correction: 0.536382 hartree<br/>         Quasiharmonic Free Energy correction: 0.555848 hartree</p> <p>SCF Energy: -1834.208989 hartree<br/>         SCF Energy + ZPVE: -1833.580189 hartree<br/>         Enthalpy: -1833.532157 hartree<br/>         Free Energy: -1833.672607 hartree</p> <p>Free Energy with quasiharmonic correction: -1833.653140 hartree<br/>         (correction: 12.22 kcal/mol)</p> <p><b>B3LYP-D3/6-311+G(d,p)</b></p> <p>SCF Done: E(RB3LYP) = -1834.89161548 A.U.</p> |                                                                                                                                                                                                                                                                                                                                                                                                                                                                                                                                                                                                                                                                                                                                                                                                                                                                                                                                                                                                                                                                                                                                                     |  |
| Cartesian<br>Coordinates                       | 76                                                                                                                                                                                                                                                                                                                                                                                                                                                                                                                                                                                                                                                                                                                         | <p>spD3-product-T3.out Energy: -1151411.8633024</p> <p>0 2.36929 -2.82289 1.96235<br/>         C 4.93034 3.14093 -1.09493<br/>         O 3.88035 2.70390 -0.56273<br/>         O 6.02824 2.51284 -1.22491<br/>         C 6.41487 -0.99923 -0.10604<br/>         C 5.65920 -1.98639 0.48601<br/>         N 5.58040 0.09046 -0.21149<br/>         C 4.38613 -0.26071 0.30431<br/>         N 4.38596 -1.51880 0.74213<br/>         C 4.89162 4.57249 -1.66301<br/>         C 7.83364 -0.98210 -0.57706<br/>         C 0.90281 -1.47992 -1.13998<br/>         C -0.41397 0.52660 -0.62222<br/>         O -1.48100 1.11746 -0.67894<br/>         C 2.89933 -3.44261 3.11934<br/>         C -0.25557 -0.95851 -0.69158<br/>         C -1.42913 -1.78821 -0.18789<br/>         C -2.63421 -1.84175 -1.12039<br/>         O -1.84415 -1.34830 1.10397<br/>         C -3.91799 -2.03558 -0.59671<br/>         C -2.47581 -1.79964 -2.51063<br/>         C -5.02097 -2.16512 -1.44191<br/>         C -3.57551 -1.94031 -3.35816<br/>         C -4.85395 -2.12075 -2.82736<br/>         O 0.76608 1.15754 -0.48180<br/>         C 0.76071 2.60269 -0.55996</p> |  |

|   |          |          |          |
|---|----------|----------|----------|
| C | 1.26198  | -2.92915 | -1.29255 |
| C | -5.46708 | 1.16961  | 0.24589  |
| O | -6.65044 | 1.08830  | -0.08515 |
| C | -5.05183 | 0.80150  | 1.67866  |
| N | -3.64219 | 0.88579  | 1.99625  |
| C | -3.15879 | 1.85788  | 2.82946  |
| O | -3.87416 | 2.70201  | 3.36392  |
| C | -1.64949 | 1.83581  | 3.02496  |
| N | -4.48471 | 1.58971  | -0.58311 |
| C | -4.76625 | 1.88130  | -1.97550 |
| H | -3.43224 | -1.89840 | -4.43545 |
| H | -5.71323 | -2.21971 | -3.48601 |
| H | -6.01330 | -2.28619 | -1.01589 |
| H | -4.04568 | -2.07799 | 0.47950  |
| H | -1.48661 | -1.64332 | -2.93171 |
| H | 1.87580  | -3.07357 | -2.18900 |
| H | 0.39498  | -3.59120 | -1.36202 |
| H | 1.86576  | -3.24347 | -0.43033 |
| H | 3.62448  | -4.22991 | 2.86200  |
| H | -1.06579 | -2.82172 | -0.08852 |
| H | 2.07311  | -3.90718 | 3.66839  |
| H | 3.39769  | -2.72455 | 3.78794  |
| H | 1.69367  | -0.78039 | -1.39957 |
| H | 7.90454  | -0.76845 | -1.65133 |
| H | 8.42580  | -0.21631 | -0.05976 |
| H | 8.30521  | -1.95357 | -0.39439 |
| H | -1.15978 | 2.19573  | 2.11235  |
| H | -1.26702 | 0.83102  | 3.23231  |
| H | -1.39451 | 2.50388  | 3.84935  |
| H | -3.00637 | 0.17848  | 1.62445  |
| H | -5.57718 | 1.48253  | 2.35317  |
| H | -5.43347 | -0.20951 | 1.86613  |
| H | -3.51489 | 1.48102  | -0.30917 |
| H | -3.85817 | 2.27685  | -2.43618 |
| H | -5.08224 | 0.98317  | -2.52038 |
| H | 4.21216  | 4.60563  | -2.52440 |
| H | 1.81601  | 2.88716  | -0.58313 |
| H | 0.23009  | 2.91999  | -1.46203 |
| H | 4.48977  | 5.26224  | -0.91180 |
| H | 0.24789  | 3.01784  | 0.31316  |
| H | 5.88328  | 4.90731  | -1.98027 |
| H | -5.56745 | 2.62343  | -2.05081 |
| O | 0.46838  | -0.96023 | 2.47819  |
| H | 3.12762  | -2.32752 | 1.49537  |
| H | 5.95506  | -2.99665 | 0.74010  |
| H | 3.56399  | 0.44039  | 0.32619  |
| H | 5.79276  | 1.06374  | -0.62169 |
| H | 1.14487  | -1.67501 | 2.31655  |
| H | 0.82548  | -0.19499 | 2.00023  |
| H | -1.02959 | -1.30900 | 1.67453  |

Optimized Molecular Properties for **T4-TS2**

|                                                |                                                                                                                                                                                                                                                                                                                                                                                                                                                                                                                                                                                                                                                                                                                                                                                                                                                                                                                                                                                                                                                                                                                                                                                                                                                                                                                                                                                                                                                                                                                                                                                                                                                                                                                                                                                                                                                                                                                                                                                                                                           |          |          |          |          |   |          |         |          |   |          |         |          |   |          |         |          |   |          |          |          |   |          |          |          |   |          |          |          |   |          |          |          |   |          |          |          |   |          |         |          |   |          |          |          |   |          |          |         |   |         |          |          |   |         |         |          |   |          |          |          |   |         |          |          |   |         |          |         |   |         |          |         |   |         |          |         |   |         |         |         |   |         |          |         |   |         |         |         |   |          |          |         |   |          |         |         |   |         |          |          |   |          |         |         |   |          |         |          |
|------------------------------------------------|-------------------------------------------------------------------------------------------------------------------------------------------------------------------------------------------------------------------------------------------------------------------------------------------------------------------------------------------------------------------------------------------------------------------------------------------------------------------------------------------------------------------------------------------------------------------------------------------------------------------------------------------------------------------------------------------------------------------------------------------------------------------------------------------------------------------------------------------------------------------------------------------------------------------------------------------------------------------------------------------------------------------------------------------------------------------------------------------------------------------------------------------------------------------------------------------------------------------------------------------------------------------------------------------------------------------------------------------------------------------------------------------------------------------------------------------------------------------------------------------------------------------------------------------------------------------------------------------------------------------------------------------------------------------------------------------------------------------------------------------------------------------------------------------------------------------------------------------------------------------------------------------------------------------------------------------------------------------------------------------------------------------------------------------|----------|----------|----------|----------|---|----------|---------|----------|---|----------|---------|----------|---|----------|---------|----------|---|----------|----------|----------|---|----------|----------|----------|---|----------|----------|----------|---|----------|----------|----------|---|----------|----------|----------|---|----------|---------|----------|---|----------|----------|----------|---|----------|----------|---------|---|---------|----------|----------|---|---------|---------|----------|---|----------|----------|----------|---|---------|----------|----------|---|---------|----------|---------|---|---------|----------|---------|---|---------|----------|---------|---|---------|---------|---------|---|---------|----------|---------|---|---------|---------|---------|---|----------|----------|---------|---|----------|---------|---------|---|---------|----------|----------|---|----------|---------|---------|---|----------|---------|----------|
| Number of<br>(-)<br>Vibrational<br>Frequencies | 1 (-44.6977)                                                                                                                                                                                                                                                                                                                                                                                                                                                                                                                                                                                                                                                                                                                                                                                                                                                                                                                                                                                                                                                                                                                                                                                                                                                                                                                                                                                                                                                                                                                                                                                                                                                                                                                                                                                                                                                                                                                                                                                                                              |          |          |          |          |   |          |         |          |   |          |         |          |   |          |         |          |   |          |          |          |   |          |          |          |   |          |          |          |   |          |          |          |   |          |          |          |   |          |         |          |   |          |          |          |   |          |          |         |   |         |          |          |   |         |         |          |   |          |          |          |   |         |          |          |   |         |          |         |   |         |          |         |   |         |          |         |   |         |         |         |   |         |          |         |   |         |         |         |   |          |          |         |   |          |         |         |   |         |          |          |   |          |         |         |   |          |         |          |
| Absolute<br>Energies<br>(Hartrees)             | <p><b>B3LYP/6-31G(d)</b></p> <p>There are 26 positive frequencies below 100 cm<sup>-1</sup>.</p> <p>Zero-point correction: 0.656167 hartree<br/>         Enthalpy correction: 0.705177 hartree<br/>         Free Energy correction: 0.560662 hartree<br/>         Quasiharmonic Free Energy correction: 0.581962 hartree</p> <p>SCF Energy: -1873.484741 hartree<br/>         SCF Energy + ZPVE: -1872.828574 hartree<br/>         Enthalpy: -1872.779564 hartree<br/>         Free Energy: -1872.924079 hartree</p> <p>Free Energy with quasiharmonic correction: -1872.902778 hartree<br/>         (correction: 13.37 kcal/mol)</p> <p><b>B3LYP-D3/6-311+G(d,p)</b></p> <p>SCF Done: E(RB3LYP) = -1874.16794735 A.U.</p>                                                                                                                                                                                                                                                                                                                                                                                                                                                                                                                                                                                                                                                                                                                                                                                                                                                                                                                                                                                                                                                                                                                                                                                                                                                                                                                |          |          |          |          |   |          |         |          |   |          |         |          |   |          |         |          |   |          |          |          |   |          |          |          |   |          |          |          |   |          |          |          |   |          |          |          |   |          |         |          |   |          |          |          |   |          |          |         |   |         |          |          |   |         |         |          |   |          |          |          |   |         |          |          |   |         |          |         |   |         |          |         |   |         |          |         |   |         |         |         |   |         |          |         |   |         |         |         |   |          |          |         |   |          |         |         |   |         |          |          |   |          |         |         |   |          |         |          |
| Cartesian<br>Coordinates                       | <p>79</p> <p>spD3-TS2-T4.out Energy: -1176058.1334584</p> <table> <tr><td>O</td><td>-1.38373</td><td>-2.90776</td><td>-0.95000</td></tr> <tr><td>C</td><td>-6.01399</td><td>2.98549</td><td>-0.65238</td></tr> <tr><td>O</td><td>-4.80908</td><td>2.82337</td><td>-0.76442</td></tr> <tr><td>O</td><td>-6.91093</td><td>2.00909</td><td>-0.55586</td></tr> <tr><td>C</td><td>-5.97799</td><td>-1.69861</td><td>-0.44983</td></tr> <tr><td>C</td><td>-4.83148</td><td>-2.45413</td><td>-0.51139</td></tr> <tr><td>N</td><td>-5.64068</td><td>-0.36708</td><td>-0.60355</td></tr> <tr><td>C</td><td>-4.32316</td><td>-0.33188</td><td>-0.75144</td></tr> <tr><td>N</td><td>-3.79160</td><td>-1.57127</td><td>-0.70322</td></tr> <tr><td>C</td><td>-6.66512</td><td>4.35641</td><td>-0.60936</td></tr> <tr><td>C</td><td>-7.39462</td><td>-2.13938</td><td>-0.25212</td></tr> <tr><td>C</td><td>-0.32888</td><td>-2.75731</td><td>0.10153</td></tr> <tr><td>C</td><td>0.54534</td><td>-0.41947</td><td>-0.39602</td></tr> <tr><td>O</td><td>1.37186</td><td>0.41904</td><td>-0.80960</td></tr> <tr><td>C</td><td>-0.91522</td><td>-3.13327</td><td>-2.26664</td></tr> <tr><td>C</td><td>0.76133</td><td>-1.80539</td><td>-0.23107</td></tr> <tr><td>C</td><td>2.39178</td><td>-1.46971</td><td>1.68637</td></tr> <tr><td>C</td><td>1.52423</td><td>-0.70074</td><td>2.61013</td></tr> <tr><td>O</td><td>3.37530</td><td>-0.96133</td><td>1.11821</td></tr> <tr><td>C</td><td>1.66634</td><td>0.69173</td><td>2.71350</td></tr> <tr><td>C</td><td>0.60035</td><td>-1.35814</td><td>3.43540</td></tr> <tr><td>C</td><td>0.88689</td><td>1.40969</td><td>3.61788</td></tr> <tr><td>C</td><td>-0.17812</td><td>-0.63898</td><td>4.33992</td></tr> <tr><td>C</td><td>-0.03761</td><td>0.74850</td><td>4.43246</td></tr> <tr><td>H</td><td>1.65010</td><td>-2.19344</td><td>-0.71774</td></tr> <tr><td>O</td><td>-0.71694</td><td>0.00231</td><td>0.00548</td></tr> <tr><td>C</td><td>-0.93824</td><td>1.40938</td><td>-0.03008</td></tr> </table> | O        | -1.38373 | -2.90776 | -0.95000 | C | -6.01399 | 2.98549 | -0.65238 | O | -4.80908 | 2.82337 | -0.76442 | O | -6.91093 | 2.00909 | -0.55586 | C | -5.97799 | -1.69861 | -0.44983 | C | -4.83148 | -2.45413 | -0.51139 | N | -5.64068 | -0.36708 | -0.60355 | C | -4.32316 | -0.33188 | -0.75144 | N | -3.79160 | -1.57127 | -0.70322 | C | -6.66512 | 4.35641 | -0.60936 | C | -7.39462 | -2.13938 | -0.25212 | C | -0.32888 | -2.75731 | 0.10153 | C | 0.54534 | -0.41947 | -0.39602 | O | 1.37186 | 0.41904 | -0.80960 | C | -0.91522 | -3.13327 | -2.26664 | C | 0.76133 | -1.80539 | -0.23107 | C | 2.39178 | -1.46971 | 1.68637 | C | 1.52423 | -0.70074 | 2.61013 | O | 3.37530 | -0.96133 | 1.11821 | C | 1.66634 | 0.69173 | 2.71350 | C | 0.60035 | -1.35814 | 3.43540 | C | 0.88689 | 1.40969 | 3.61788 | C | -0.17812 | -0.63898 | 4.33992 | C | -0.03761 | 0.74850 | 4.43246 | H | 1.65010 | -2.19344 | -0.71774 | O | -0.71694 | 0.00231 | 0.00548 | C | -0.93824 | 1.40938 | -0.03008 |
| O                                              | -1.38373                                                                                                                                                                                                                                                                                                                                                                                                                                                                                                                                                                                                                                                                                                                                                                                                                                                                                                                                                                                                                                                                                                                                                                                                                                                                                                                                                                                                                                                                                                                                                                                                                                                                                                                                                                                                                                                                                                                                                                                                                                  | -2.90776 | -0.95000 |          |          |   |          |         |          |   |          |         |          |   |          |         |          |   |          |          |          |   |          |          |          |   |          |          |          |   |          |          |          |   |          |          |          |   |          |         |          |   |          |          |          |   |          |          |         |   |         |          |          |   |         |         |          |   |          |          |          |   |         |          |          |   |         |          |         |   |         |          |         |   |         |          |         |   |         |         |         |   |         |          |         |   |         |         |         |   |          |          |         |   |          |         |         |   |         |          |          |   |          |         |         |   |          |         |          |
| C                                              | -6.01399                                                                                                                                                                                                                                                                                                                                                                                                                                                                                                                                                                                                                                                                                                                                                                                                                                                                                                                                                                                                                                                                                                                                                                                                                                                                                                                                                                                                                                                                                                                                                                                                                                                                                                                                                                                                                                                                                                                                                                                                                                  | 2.98549  | -0.65238 |          |          |   |          |         |          |   |          |         |          |   |          |         |          |   |          |          |          |   |          |          |          |   |          |          |          |   |          |          |          |   |          |          |          |   |          |         |          |   |          |          |          |   |          |          |         |   |         |          |          |   |         |         |          |   |          |          |          |   |         |          |          |   |         |          |         |   |         |          |         |   |         |          |         |   |         |         |         |   |         |          |         |   |         |         |         |   |          |          |         |   |          |         |         |   |         |          |          |   |          |         |         |   |          |         |          |
| O                                              | -4.80908                                                                                                                                                                                                                                                                                                                                                                                                                                                                                                                                                                                                                                                                                                                                                                                                                                                                                                                                                                                                                                                                                                                                                                                                                                                                                                                                                                                                                                                                                                                                                                                                                                                                                                                                                                                                                                                                                                                                                                                                                                  | 2.82337  | -0.76442 |          |          |   |          |         |          |   |          |         |          |   |          |         |          |   |          |          |          |   |          |          |          |   |          |          |          |   |          |          |          |   |          |          |          |   |          |         |          |   |          |          |          |   |          |          |         |   |         |          |          |   |         |         |          |   |          |          |          |   |         |          |          |   |         |          |         |   |         |          |         |   |         |          |         |   |         |         |         |   |         |          |         |   |         |         |         |   |          |          |         |   |          |         |         |   |         |          |          |   |          |         |         |   |          |         |          |
| O                                              | -6.91093                                                                                                                                                                                                                                                                                                                                                                                                                                                                                                                                                                                                                                                                                                                                                                                                                                                                                                                                                                                                                                                                                                                                                                                                                                                                                                                                                                                                                                                                                                                                                                                                                                                                                                                                                                                                                                                                                                                                                                                                                                  | 2.00909  | -0.55586 |          |          |   |          |         |          |   |          |         |          |   |          |         |          |   |          |          |          |   |          |          |          |   |          |          |          |   |          |          |          |   |          |          |          |   |          |         |          |   |          |          |          |   |          |          |         |   |         |          |          |   |         |         |          |   |          |          |          |   |         |          |          |   |         |          |         |   |         |          |         |   |         |          |         |   |         |         |         |   |         |          |         |   |         |         |         |   |          |          |         |   |          |         |         |   |         |          |          |   |          |         |         |   |          |         |          |
| C                                              | -5.97799                                                                                                                                                                                                                                                                                                                                                                                                                                                                                                                                                                                                                                                                                                                                                                                                                                                                                                                                                                                                                                                                                                                                                                                                                                                                                                                                                                                                                                                                                                                                                                                                                                                                                                                                                                                                                                                                                                                                                                                                                                  | -1.69861 | -0.44983 |          |          |   |          |         |          |   |          |         |          |   |          |         |          |   |          |          |          |   |          |          |          |   |          |          |          |   |          |          |          |   |          |          |          |   |          |         |          |   |          |          |          |   |          |          |         |   |         |          |          |   |         |         |          |   |          |          |          |   |         |          |          |   |         |          |         |   |         |          |         |   |         |          |         |   |         |         |         |   |         |          |         |   |         |         |         |   |          |          |         |   |          |         |         |   |         |          |          |   |          |         |         |   |          |         |          |
| C                                              | -4.83148                                                                                                                                                                                                                                                                                                                                                                                                                                                                                                                                                                                                                                                                                                                                                                                                                                                                                                                                                                                                                                                                                                                                                                                                                                                                                                                                                                                                                                                                                                                                                                                                                                                                                                                                                                                                                                                                                                                                                                                                                                  | -2.45413 | -0.51139 |          |          |   |          |         |          |   |          |         |          |   |          |         |          |   |          |          |          |   |          |          |          |   |          |          |          |   |          |          |          |   |          |          |          |   |          |         |          |   |          |          |          |   |          |          |         |   |         |          |          |   |         |         |          |   |          |          |          |   |         |          |          |   |         |          |         |   |         |          |         |   |         |          |         |   |         |         |         |   |         |          |         |   |         |         |         |   |          |          |         |   |          |         |         |   |         |          |          |   |          |         |         |   |          |         |          |
| N                                              | -5.64068                                                                                                                                                                                                                                                                                                                                                                                                                                                                                                                                                                                                                                                                                                                                                                                                                                                                                                                                                                                                                                                                                                                                                                                                                                                                                                                                                                                                                                                                                                                                                                                                                                                                                                                                                                                                                                                                                                                                                                                                                                  | -0.36708 | -0.60355 |          |          |   |          |         |          |   |          |         |          |   |          |         |          |   |          |          |          |   |          |          |          |   |          |          |          |   |          |          |          |   |          |          |          |   |          |         |          |   |          |          |          |   |          |          |         |   |         |          |          |   |         |         |          |   |          |          |          |   |         |          |          |   |         |          |         |   |         |          |         |   |         |          |         |   |         |         |         |   |         |          |         |   |         |         |         |   |          |          |         |   |          |         |         |   |         |          |          |   |          |         |         |   |          |         |          |
| C                                              | -4.32316                                                                                                                                                                                                                                                                                                                                                                                                                                                                                                                                                                                                                                                                                                                                                                                                                                                                                                                                                                                                                                                                                                                                                                                                                                                                                                                                                                                                                                                                                                                                                                                                                                                                                                                                                                                                                                                                                                                                                                                                                                  | -0.33188 | -0.75144 |          |          |   |          |         |          |   |          |         |          |   |          |         |          |   |          |          |          |   |          |          |          |   |          |          |          |   |          |          |          |   |          |          |          |   |          |         |          |   |          |          |          |   |          |          |         |   |         |          |          |   |         |         |          |   |          |          |          |   |         |          |          |   |         |          |         |   |         |          |         |   |         |          |         |   |         |         |         |   |         |          |         |   |         |         |         |   |          |          |         |   |          |         |         |   |         |          |          |   |          |         |         |   |          |         |          |
| N                                              | -3.79160                                                                                                                                                                                                                                                                                                                                                                                                                                                                                                                                                                                                                                                                                                                                                                                                                                                                                                                                                                                                                                                                                                                                                                                                                                                                                                                                                                                                                                                                                                                                                                                                                                                                                                                                                                                                                                                                                                                                                                                                                                  | -1.57127 | -0.70322 |          |          |   |          |         |          |   |          |         |          |   |          |         |          |   |          |          |          |   |          |          |          |   |          |          |          |   |          |          |          |   |          |          |          |   |          |         |          |   |          |          |          |   |          |          |         |   |         |          |          |   |         |         |          |   |          |          |          |   |         |          |          |   |         |          |         |   |         |          |         |   |         |          |         |   |         |         |         |   |         |          |         |   |         |         |         |   |          |          |         |   |          |         |         |   |         |          |          |   |          |         |         |   |          |         |          |
| C                                              | -6.66512                                                                                                                                                                                                                                                                                                                                                                                                                                                                                                                                                                                                                                                                                                                                                                                                                                                                                                                                                                                                                                                                                                                                                                                                                                                                                                                                                                                                                                                                                                                                                                                                                                                                                                                                                                                                                                                                                                                                                                                                                                  | 4.35641  | -0.60936 |          |          |   |          |         |          |   |          |         |          |   |          |         |          |   |          |          |          |   |          |          |          |   |          |          |          |   |          |          |          |   |          |          |          |   |          |         |          |   |          |          |          |   |          |          |         |   |         |          |          |   |         |         |          |   |          |          |          |   |         |          |          |   |         |          |         |   |         |          |         |   |         |          |         |   |         |         |         |   |         |          |         |   |         |         |         |   |          |          |         |   |          |         |         |   |         |          |          |   |          |         |         |   |          |         |          |
| C                                              | -7.39462                                                                                                                                                                                                                                                                                                                                                                                                                                                                                                                                                                                                                                                                                                                                                                                                                                                                                                                                                                                                                                                                                                                                                                                                                                                                                                                                                                                                                                                                                                                                                                                                                                                                                                                                                                                                                                                                                                                                                                                                                                  | -2.13938 | -0.25212 |          |          |   |          |         |          |   |          |         |          |   |          |         |          |   |          |          |          |   |          |          |          |   |          |          |          |   |          |          |          |   |          |          |          |   |          |         |          |   |          |          |          |   |          |          |         |   |         |          |          |   |         |         |          |   |          |          |          |   |         |          |          |   |         |          |         |   |         |          |         |   |         |          |         |   |         |         |         |   |         |          |         |   |         |         |         |   |          |          |         |   |          |         |         |   |         |          |          |   |          |         |         |   |          |         |          |
| C                                              | -0.32888                                                                                                                                                                                                                                                                                                                                                                                                                                                                                                                                                                                                                                                                                                                                                                                                                                                                                                                                                                                                                                                                                                                                                                                                                                                                                                                                                                                                                                                                                                                                                                                                                                                                                                                                                                                                                                                                                                                                                                                                                                  | -2.75731 | 0.10153  |          |          |   |          |         |          |   |          |         |          |   |          |         |          |   |          |          |          |   |          |          |          |   |          |          |          |   |          |          |          |   |          |          |          |   |          |         |          |   |          |          |          |   |          |          |         |   |         |          |          |   |         |         |          |   |          |          |          |   |         |          |          |   |         |          |         |   |         |          |         |   |         |          |         |   |         |         |         |   |         |          |         |   |         |         |         |   |          |          |         |   |          |         |         |   |         |          |          |   |          |         |         |   |          |         |          |
| C                                              | 0.54534                                                                                                                                                                                                                                                                                                                                                                                                                                                                                                                                                                                                                                                                                                                                                                                                                                                                                                                                                                                                                                                                                                                                                                                                                                                                                                                                                                                                                                                                                                                                                                                                                                                                                                                                                                                                                                                                                                                                                                                                                                   | -0.41947 | -0.39602 |          |          |   |          |         |          |   |          |         |          |   |          |         |          |   |          |          |          |   |          |          |          |   |          |          |          |   |          |          |          |   |          |          |          |   |          |         |          |   |          |          |          |   |          |          |         |   |         |          |          |   |         |         |          |   |          |          |          |   |         |          |          |   |         |          |         |   |         |          |         |   |         |          |         |   |         |         |         |   |         |          |         |   |         |         |         |   |          |          |         |   |          |         |         |   |         |          |          |   |          |         |         |   |          |         |          |
| O                                              | 1.37186                                                                                                                                                                                                                                                                                                                                                                                                                                                                                                                                                                                                                                                                                                                                                                                                                                                                                                                                                                                                                                                                                                                                                                                                                                                                                                                                                                                                                                                                                                                                                                                                                                                                                                                                                                                                                                                                                                                                                                                                                                   | 0.41904  | -0.80960 |          |          |   |          |         |          |   |          |         |          |   |          |         |          |   |          |          |          |   |          |          |          |   |          |          |          |   |          |          |          |   |          |          |          |   |          |         |          |   |          |          |          |   |          |          |         |   |         |          |          |   |         |         |          |   |          |          |          |   |         |          |          |   |         |          |         |   |         |          |         |   |         |          |         |   |         |         |         |   |         |          |         |   |         |         |         |   |          |          |         |   |          |         |         |   |         |          |          |   |          |         |         |   |          |         |          |
| C                                              | -0.91522                                                                                                                                                                                                                                                                                                                                                                                                                                                                                                                                                                                                                                                                                                                                                                                                                                                                                                                                                                                                                                                                                                                                                                                                                                                                                                                                                                                                                                                                                                                                                                                                                                                                                                                                                                                                                                                                                                                                                                                                                                  | -3.13327 | -2.26664 |          |          |   |          |         |          |   |          |         |          |   |          |         |          |   |          |          |          |   |          |          |          |   |          |          |          |   |          |          |          |   |          |          |          |   |          |         |          |   |          |          |          |   |          |          |         |   |         |          |          |   |         |         |          |   |          |          |          |   |         |          |          |   |         |          |         |   |         |          |         |   |         |          |         |   |         |         |         |   |         |          |         |   |         |         |         |   |          |          |         |   |          |         |         |   |         |          |          |   |          |         |         |   |          |         |          |
| C                                              | 0.76133                                                                                                                                                                                                                                                                                                                                                                                                                                                                                                                                                                                                                                                                                                                                                                                                                                                                                                                                                                                                                                                                                                                                                                                                                                                                                                                                                                                                                                                                                                                                                                                                                                                                                                                                                                                                                                                                                                                                                                                                                                   | -1.80539 | -0.23107 |          |          |   |          |         |          |   |          |         |          |   |          |         |          |   |          |          |          |   |          |          |          |   |          |          |          |   |          |          |          |   |          |          |          |   |          |         |          |   |          |          |          |   |          |          |         |   |         |          |          |   |         |         |          |   |          |          |          |   |         |          |          |   |         |          |         |   |         |          |         |   |         |          |         |   |         |         |         |   |         |          |         |   |         |         |         |   |          |          |         |   |          |         |         |   |         |          |          |   |          |         |         |   |          |         |          |
| C                                              | 2.39178                                                                                                                                                                                                                                                                                                                                                                                                                                                                                                                                                                                                                                                                                                                                                                                                                                                                                                                                                                                                                                                                                                                                                                                                                                                                                                                                                                                                                                                                                                                                                                                                                                                                                                                                                                                                                                                                                                                                                                                                                                   | -1.46971 | 1.68637  |          |          |   |          |         |          |   |          |         |          |   |          |         |          |   |          |          |          |   |          |          |          |   |          |          |          |   |          |          |          |   |          |          |          |   |          |         |          |   |          |          |          |   |          |          |         |   |         |          |          |   |         |         |          |   |          |          |          |   |         |          |          |   |         |          |         |   |         |          |         |   |         |          |         |   |         |         |         |   |         |          |         |   |         |         |         |   |          |          |         |   |          |         |         |   |         |          |          |   |          |         |         |   |          |         |          |
| C                                              | 1.52423                                                                                                                                                                                                                                                                                                                                                                                                                                                                                                                                                                                                                                                                                                                                                                                                                                                                                                                                                                                                                                                                                                                                                                                                                                                                                                                                                                                                                                                                                                                                                                                                                                                                                                                                                                                                                                                                                                                                                                                                                                   | -0.70074 | 2.61013  |          |          |   |          |         |          |   |          |         |          |   |          |         |          |   |          |          |          |   |          |          |          |   |          |          |          |   |          |          |          |   |          |          |          |   |          |         |          |   |          |          |          |   |          |          |         |   |         |          |          |   |         |         |          |   |          |          |          |   |         |          |          |   |         |          |         |   |         |          |         |   |         |          |         |   |         |         |         |   |         |          |         |   |         |         |         |   |          |          |         |   |          |         |         |   |         |          |          |   |          |         |         |   |          |         |          |
| O                                              | 3.37530                                                                                                                                                                                                                                                                                                                                                                                                                                                                                                                                                                                                                                                                                                                                                                                                                                                                                                                                                                                                                                                                                                                                                                                                                                                                                                                                                                                                                                                                                                                                                                                                                                                                                                                                                                                                                                                                                                                                                                                                                                   | -0.96133 | 1.11821  |          |          |   |          |         |          |   |          |         |          |   |          |         |          |   |          |          |          |   |          |          |          |   |          |          |          |   |          |          |          |   |          |          |          |   |          |         |          |   |          |          |          |   |          |          |         |   |         |          |          |   |         |         |          |   |          |          |          |   |         |          |          |   |         |          |         |   |         |          |         |   |         |          |         |   |         |         |         |   |         |          |         |   |         |         |         |   |          |          |         |   |          |         |         |   |         |          |          |   |          |         |         |   |          |         |          |
| C                                              | 1.66634                                                                                                                                                                                                                                                                                                                                                                                                                                                                                                                                                                                                                                                                                                                                                                                                                                                                                                                                                                                                                                                                                                                                                                                                                                                                                                                                                                                                                                                                                                                                                                                                                                                                                                                                                                                                                                                                                                                                                                                                                                   | 0.69173  | 2.71350  |          |          |   |          |         |          |   |          |         |          |   |          |         |          |   |          |          |          |   |          |          |          |   |          |          |          |   |          |          |          |   |          |          |          |   |          |         |          |   |          |          |          |   |          |          |         |   |         |          |          |   |         |         |          |   |          |          |          |   |         |          |          |   |         |          |         |   |         |          |         |   |         |          |         |   |         |         |         |   |         |          |         |   |         |         |         |   |          |          |         |   |          |         |         |   |         |          |          |   |          |         |         |   |          |         |          |
| C                                              | 0.60035                                                                                                                                                                                                                                                                                                                                                                                                                                                                                                                                                                                                                                                                                                                                                                                                                                                                                                                                                                                                                                                                                                                                                                                                                                                                                                                                                                                                                                                                                                                                                                                                                                                                                                                                                                                                                                                                                                                                                                                                                                   | -1.35814 | 3.43540  |          |          |   |          |         |          |   |          |         |          |   |          |         |          |   |          |          |          |   |          |          |          |   |          |          |          |   |          |          |          |   |          |          |          |   |          |         |          |   |          |          |          |   |          |          |         |   |         |          |          |   |         |         |          |   |          |          |          |   |         |          |          |   |         |          |         |   |         |          |         |   |         |          |         |   |         |         |         |   |         |          |         |   |         |         |         |   |          |          |         |   |          |         |         |   |         |          |          |   |          |         |         |   |          |         |          |
| C                                              | 0.88689                                                                                                                                                                                                                                                                                                                                                                                                                                                                                                                                                                                                                                                                                                                                                                                                                                                                                                                                                                                                                                                                                                                                                                                                                                                                                                                                                                                                                                                                                                                                                                                                                                                                                                                                                                                                                                                                                                                                                                                                                                   | 1.40969  | 3.61788  |          |          |   |          |         |          |   |          |         |          |   |          |         |          |   |          |          |          |   |          |          |          |   |          |          |          |   |          |          |          |   |          |          |          |   |          |         |          |   |          |          |          |   |          |          |         |   |         |          |          |   |         |         |          |   |          |          |          |   |         |          |          |   |         |          |         |   |         |          |         |   |         |          |         |   |         |         |         |   |         |          |         |   |         |         |         |   |          |          |         |   |          |         |         |   |         |          |          |   |          |         |         |   |          |         |          |
| C                                              | -0.17812                                                                                                                                                                                                                                                                                                                                                                                                                                                                                                                                                                                                                                                                                                                                                                                                                                                                                                                                                                                                                                                                                                                                                                                                                                                                                                                                                                                                                                                                                                                                                                                                                                                                                                                                                                                                                                                                                                                                                                                                                                  | -0.63898 | 4.33992  |          |          |   |          |         |          |   |          |         |          |   |          |         |          |   |          |          |          |   |          |          |          |   |          |          |          |   |          |          |          |   |          |          |          |   |          |         |          |   |          |          |          |   |          |          |         |   |         |          |          |   |         |         |          |   |          |          |          |   |         |          |          |   |         |          |         |   |         |          |         |   |         |          |         |   |         |         |         |   |         |          |         |   |         |         |         |   |          |          |         |   |          |         |         |   |         |          |          |   |          |         |         |   |          |         |          |
| C                                              | -0.03761                                                                                                                                                                                                                                                                                                                                                                                                                                                                                                                                                                                                                                                                                                                                                                                                                                                                                                                                                                                                                                                                                                                                                                                                                                                                                                                                                                                                                                                                                                                                                                                                                                                                                                                                                                                                                                                                                                                                                                                                                                  | 0.74850  | 4.43246  |          |          |   |          |         |          |   |          |         |          |   |          |         |          |   |          |          |          |   |          |          |          |   |          |          |          |   |          |          |          |   |          |          |          |   |          |         |          |   |          |          |          |   |          |          |         |   |         |          |          |   |         |         |          |   |          |          |          |   |         |          |          |   |         |          |         |   |         |          |         |   |         |          |         |   |         |         |         |   |         |          |         |   |         |         |         |   |          |          |         |   |          |         |         |   |         |          |          |   |          |         |         |   |          |         |          |
| H                                              | 1.65010                                                                                                                                                                                                                                                                                                                                                                                                                                                                                                                                                                                                                                                                                                                                                                                                                                                                                                                                                                                                                                                                                                                                                                                                                                                                                                                                                                                                                                                                                                                                                                                                                                                                                                                                                                                                                                                                                                                                                                                                                                   | -2.19344 | -0.71774 |          |          |   |          |         |          |   |          |         |          |   |          |         |          |   |          |          |          |   |          |          |          |   |          |          |          |   |          |          |          |   |          |          |          |   |          |         |          |   |          |          |          |   |          |          |         |   |         |          |          |   |         |         |          |   |          |          |          |   |         |          |          |   |         |          |         |   |         |          |         |   |         |          |         |   |         |         |         |   |         |          |         |   |         |         |         |   |          |          |         |   |          |         |         |   |         |          |          |   |          |         |         |   |          |         |          |
| O                                              | -0.71694                                                                                                                                                                                                                                                                                                                                                                                                                                                                                                                                                                                                                                                                                                                                                                                                                                                                                                                                                                                                                                                                                                                                                                                                                                                                                                                                                                                                                                                                                                                                                                                                                                                                                                                                                                                                                                                                                                                                                                                                                                  | 0.00231  | 0.00548  |          |          |   |          |         |          |   |          |         |          |   |          |         |          |   |          |          |          |   |          |          |          |   |          |          |          |   |          |          |          |   |          |          |          |   |          |         |          |   |          |          |          |   |          |          |         |   |         |          |          |   |         |         |          |   |          |          |          |   |         |          |          |   |         |          |         |   |         |          |         |   |         |          |         |   |         |         |         |   |         |          |         |   |         |         |         |   |          |          |         |   |          |         |         |   |         |          |          |   |          |         |         |   |          |         |          |
| C                                              | -0.93824                                                                                                                                                                                                                                                                                                                                                                                                                                                                                                                                                                                                                                                                                                                                                                                                                                                                                                                                                                                                                                                                                                                                                                                                                                                                                                                                                                                                                                                                                                                                                                                                                                                                                                                                                                                                                                                                                                                                                                                                                                  | 1.40938  | -0.03008 |          |          |   |          |         |          |   |          |         |          |   |          |         |          |   |          |          |          |   |          |          |          |   |          |          |          |   |          |          |          |   |          |          |          |   |          |         |          |   |          |          |          |   |          |          |         |   |         |          |          |   |         |         |          |   |          |          |          |   |         |          |          |   |         |          |         |   |         |          |         |   |         |          |         |   |         |         |         |   |         |          |         |   |         |         |         |   |          |          |         |   |          |         |         |   |         |          |          |   |          |         |         |   |          |         |          |

|   |          |          |          |
|---|----------|----------|----------|
| C | 0.17233  | -4.16228 | 0.44794  |
| C | 4.12487  | 3.12893  | -0.12016 |
| O | 4.66116  | 4.15159  | 0.30916  |
| C | 4.98678  | 1.89029  | -0.41444 |
| N | 4.36060  | 0.80864  | -1.13685 |
| C | 4.57236  | 0.60819  | -2.47304 |
| O | 5.36072  | 1.28025  | -3.13688 |
| C | 3.76133  | -0.53732 | -3.05944 |
| N | 2.78936  | 3.00616  | -0.33462 |
| C | 1.88432  | 4.11020  | -0.09066 |
| H | -0.89406 | -1.15776 | 4.97296  |
| H | -0.64457 | 1.31145  | 5.13748  |
| H | 1.00192  | 2.48848  | 3.69170  |
| H | 2.38754  | 1.18900  | 2.07400  |
| H | 0.49656  | -2.43890 | 3.36422  |
| H | 0.74197  | -4.15093 | 1.38371  |
| H | 0.83713  | -4.55523 | -0.32992 |
| H | -0.67167 | -4.85103 | 0.56635  |
| H | -0.45191 | -4.12585 | -2.37358 |
| H | 2.28943  | -2.56417 | 1.74579  |
| H | -0.18682 | -2.37270 | -2.57378 |
| H | -1.78868 | -3.08559 | -2.92566 |
| H | -0.93621 | -2.37192 | 0.92774  |
| H | -7.83046 | -1.69539 | 0.65191  |
| H | -8.02979 | -1.84006 | -1.09551 |
| H | -7.45394 | -3.22861 | -0.15493 |
| H | 3.99649  | -0.63008 | -4.12162 |
| H | 2.69203  | -0.34386 | -2.92104 |
| H | 3.99031  | -1.47517 | -2.53889 |
| H | 3.65186  | 0.25614  | -0.66078 |
| H | 5.84130  | 2.23556  | -0.99990 |
| H | 5.36076  | 1.52740  | 0.55104  |
| H | 2.38908  | 2.11306  | -0.62026 |
| H | 1.21088  | 4.25123  | -0.94398 |
| H | 1.27138  | 3.94643  | 0.80645  |
| H | -5.90205 | 5.13226  | -0.68749 |
| H | -1.98473 | 1.55970  | 0.24490  |
| H | -0.29625 | 1.93181  | 0.68600  |
| H | -7.38267 | 4.45564  | -1.43126 |
| H | -0.75385 | 1.81773  | -1.02925 |
| H | -7.22434 | 4.47616  | 0.32500  |
| H | 2.48445  | 5.01021  | 0.05585  |
| O | 4.50553  | -2.91350 | -0.49003 |
| H | 4.12633  | -2.18482 | 0.05539  |
| H | -2.79794 | -1.84415 | -0.78295 |
| H | -6.44206 | 1.09651  | -0.57934 |
| H | -3.75158 | 0.57261  | -0.89338 |
| H | -4.66286 | -3.51782 | -0.43433 |
| C | 5.90928  | -2.83463 | -0.36840 |
| H | 6.34445  | -3.62301 | -0.99402 |
| H | 6.25618  | -2.99743 | 0.66698  |
| H | 6.31263  | -1.86848 | -0.71050 |

Optimized Molecular Properties for **T4-INT2**

|                                                |                                                                                                                                                                                                                                                                                                                                                                                                                                                                                                                                                                                                                                                                                                                            |                          |          |
|------------------------------------------------|----------------------------------------------------------------------------------------------------------------------------------------------------------------------------------------------------------------------------------------------------------------------------------------------------------------------------------------------------------------------------------------------------------------------------------------------------------------------------------------------------------------------------------------------------------------------------------------------------------------------------------------------------------------------------------------------------------------------------|--------------------------|----------|
| Number of<br>(-)<br>Vibrational<br>Frequencies | 0                                                                                                                                                                                                                                                                                                                                                                                                                                                                                                                                                                                                                                                                                                                          |                          |          |
| Absolute<br>Energies<br>(Hartrees)             | <p><b>B3LYP/6-31G(d)</b></p> <p>There are 26 positive frequencies below 100 cm<sup>-1</sup>.</p> <p>Zero-point correction: 0.659052 hartree<br/>         Enthalpy correction: 0.707511 hartree<br/>         Free Energy correction: 0.562961 hartree<br/>         Quasiharmonic Free Energy correction: 0.585743 hartree</p> <p>SCF Energy: -1873.496993 hartree<br/>         SCF Energy + ZPVE: -1872.837941 hartree<br/>         Enthalpy: -1872.789482 hartree<br/>         Free Energy: -1872.934032 hartree</p> <p>Free Energy with quasiharmonic correction: -1872.911250 hartree<br/>         (correction: 14.30 kcal/mol)</p> <p><b>B3LYP-D3/6-311+G(d,p)</b></p> <p>SCF Done: E(RB3LYP) = -1874.18004105 A.U.</p> |                          |          |
| Cartesian<br>Coordinates                       | 79<br>spD3-INT2-T4.out                                                                                                                                                                                                                                                                                                                                                                                                                                                                                                                                                                                                                                                                                                     | Energy: -1176065.7223697 |          |
|                                                | O                                                                                                                                                                                                                                                                                                                                                                                                                                                                                                                                                                                                                                                                                                                          | -1.19271                 | -2.55968 |
|                                                | C                                                                                                                                                                                                                                                                                                                                                                                                                                                                                                                                                                                                                                                                                                                          | -5.93387                 | 2.74949  |
|                                                | O                                                                                                                                                                                                                                                                                                                                                                                                                                                                                                                                                                                                                                                                                                                          | -4.73420                 | 2.52032  |
|                                                | O                                                                                                                                                                                                                                                                                                                                                                                                                                                                                                                                                                                                                                                                                                                          | -6.88649                 | 1.82202  |
|                                                | C                                                                                                                                                                                                                                                                                                                                                                                                                                                                                                                                                                                                                                                                                                                          | -6.11131                 | -1.94757 |
|                                                | C                                                                                                                                                                                                                                                                                                                                                                                                                                                                                                                                                                                                                                                                                                                          | -4.98522                 | -2.73446 |
|                                                | N                                                                                                                                                                                                                                                                                                                                                                                                                                                                                                                                                                                                                                                                                                                          | -5.72611                 | -0.62151 |
|                                                | C                                                                                                                                                                                                                                                                                                                                                                                                                                                                                                                                                                                                                                                                                                                          | -4.40167                 | -0.61900 |
|                                                | N                                                                                                                                                                                                                                                                                                                                                                                                                                                                                                                                                                                                                                                                                                                          | -3.90803                 | -1.87426 |
|                                                | C                                                                                                                                                                                                                                                                                                                                                                                                                                                                                                                                                                                                                                                                                                                          | -6.51011                 | 4.15280  |
|                                                | C                                                                                                                                                                                                                                                                                                                                                                                                                                                                                                                                                                                                                                                                                                                          | -7.55131                 | -2.35472 |
|                                                | C                                                                                                                                                                                                                                                                                                                                                                                                                                                                                                                                                                                                                                                                                                                          | -0.38952                 | -2.22093 |
|                                                | C                                                                                                                                                                                                                                                                                                                                                                                                                                                                                                                                                                                                                                                                                                                          | 0.39530                  | -0.08515 |
|                                                | O                                                                                                                                                                                                                                                                                                                                                                                                                                                                                                                                                                                                                                                                                                                          | 1.08718                  | 0.45876  |
|                                                | C                                                                                                                                                                                                                                                                                                                                                                                                                                                                                                                                                                                                                                                                                                                          | -0.54890                 | -3.26443 |
|                                                | C                                                                                                                                                                                                                                                                                                                                                                                                                                                                                                                                                                                                                                                                                                                          | 0.79177                  | -1.32033 |
|                                                | C                                                                                                                                                                                                                                                                                                                                                                                                                                                                                                                                                                                                                                                                                                                          | 1.80406                  | -0.91641 |
|                                                | C                                                                                                                                                                                                                                                                                                                                                                                                                                                                                                                                                                                                                                                                                                                          | 1.30922                  | 0.34212  |
|                                                | O                                                                                                                                                                                                                                                                                                                                                                                                                                                                                                                                                                                                                                                                                                                          | 3.07794                  | -0.83215 |
|                                                | C                                                                                                                                                                                                                                                                                                                                                                                                                                                                                                                                                                                                                                                                                                                          | 1.94933                  | 1.56744  |
|                                                | C                                                                                                                                                                                                                                                                                                                                                                                                                                                                                                                                                                                                                                                                                                                          | 0.24543                  | 0.29940  |
|                                                | C                                                                                                                                                                                                                                                                                                                                                                                                                                                                                                                                                                                                                                                                                                                          | 1.52019                  | 2.72460  |
|                                                | C                                                                                                                                                                                                                                                                                                                                                                                                                                                                                                                                                                                                                                                                                                                          | -0.18618                 | 1.45124  |
|                                                | C                                                                                                                                                                                                                                                                                                                                                                                                                                                                                                                                                                                                                                                                                                                          | 0.44807                  | 2.67259  |
|                                                | H                                                                                                                                                                                                                                                                                                                                                                                                                                                                                                                                                                                                                                                                                                                          | 1.46692                  | -1.88803 |
|                                                | O                                                                                                                                                                                                                                                                                                                                                                                                                                                                                                                                                                                                                                                                                                                          | -0.79806                 | 0.42921  |
|                                                | C                                                                                                                                                                                                                                                                                                                                                                                                                                                                                                                                                                                                                                                                                                                          | -1.12637                 | 1.71696  |
|                                                |                                                                                                                                                                                                                                                                                                                                                                                                                                                                                                                                                                                                                                                                                                                            |                          | -0.57151 |



|   |          |          |          |
|---|----------|----------|----------|
| C | 0.02330  | -3.50283 | 1.47185  |
| C | 4.67336  | 2.58018  | -0.93549 |
| O | 5.31244  | 3.61852  | -0.76095 |
| C | 5.35182  | 1.21362  | -0.75225 |
| N | 4.54587  | 0.05247  | -1.04921 |
| C | 4.70941  | -0.63106 | -2.21821 |
| O | 5.52903  | -0.31355 | -3.08263 |
| C | 3.77504  | -1.82111 | -2.38713 |
| N | 3.35988  | 2.54240  | -1.27747 |
| C | 2.57048  | 3.74205  | -1.44335 |
| H | -1.01372 | 1.39454  | 4.59000  |
| H | 0.11639  | 3.57206  | 4.16117  |
| H | 2.03368  | 3.66671  | 2.57172  |
| H | 2.79787  | 1.58507  | 1.42453  |
| H | -0.24688 | -0.65013 | 3.43160  |
| H | 0.18786  | -3.29808 | 2.53380  |
| H | 0.95482  | -3.92613 | 1.08075  |
| H | -0.78387 | -4.24080 | 1.39524  |
| H | -0.07019 | -4.18528 | -1.13296 |
| H | 1.66431  | -1.75250 | 2.29997  |
| H | 0.20207  | -2.64914 | -1.99852 |
| H | -1.33249 | -3.52689 | -2.20650 |
| H | -1.10385 | -1.65912 | 1.34238  |
| H | -8.07571 | -1.92665 | 0.37735  |
| H | -8.07740 | -2.01074 | -1.38542 |
| H | -7.64787 | -3.44423 | -0.43386 |
| H | 4.06413  | -2.36754 | -3.28771 |
| H | 2.74576  | -1.45805 | -2.49690 |
| H | 3.80330  | -2.48471 | -1.51469 |
| H | 3.89127  | -0.28755 | -0.31815 |
| H | 6.23074  | 1.20525  | -1.40220 |
| H | 5.69648  | 1.17294  | 0.28795  |
| H | 2.89882  | 1.64120  | -1.35253 |
| H | 2.08726  | 3.76264  | -2.42811 |
| H | 1.79028  | 3.81618  | -0.67430 |
| H | -5.70220 | 4.88581  | -0.62710 |
| H | -2.13832 | 1.94411  | -0.23497 |
| H | -0.42463 | 2.46773  | -0.19773 |
| H | -7.13686 | 4.29481  | -1.51882 |
| H | -1.08123 | 1.69569  | -1.66349 |
| H | -7.15099 | 4.29824  | 0.24469  |
| H | 3.24439  | 4.59632  | -1.35184 |
| O | 3.53640  | -3.35327 | 0.71567  |
| H | 3.43703  | -2.35066 | 0.89418  |
| H | -2.90952 | -2.12626 | -0.48296 |
| H | -6.46885 | 0.88787  | -0.60992 |
| H | -3.79231 | 0.27069  | -0.61435 |
| H | -4.86060 | -3.80560 | -0.40654 |
| C | 4.61055  | -3.82716 | 1.48548  |
| H | 4.74394  | -4.89881 | 1.28112  |
| H | 4.44499  | -3.71565 | 2.57251  |
| H | 5.56429  | -3.32430 | 1.24831  |

Optimized Molecular Properties for **T4-TS3**

|                                                |                                                                                                                                                                                                                                                                                                                                                                                                                                                                                                                                                                                                                                                                                                                            |                          |                   |
|------------------------------------------------|----------------------------------------------------------------------------------------------------------------------------------------------------------------------------------------------------------------------------------------------------------------------------------------------------------------------------------------------------------------------------------------------------------------------------------------------------------------------------------------------------------------------------------------------------------------------------------------------------------------------------------------------------------------------------------------------------------------------------|--------------------------|-------------------|
| Number of<br>(-)<br>Vibrational<br>Frequencies | 1 (-1105.4627)                                                                                                                                                                                                                                                                                                                                                                                                                                                                                                                                                                                                                                                                                                             |                          |                   |
| Absolute<br>Energies<br>(Hartrees)             | <p><b>B3LYP/6-31G(d)</b></p> <p>There are 23 positive frequencies below 100 cm<sup>-1</sup>.</p> <p>Zero-point correction: 0.656074 hartree<br/>         Enthalpy correction: 0.703221 hartree<br/>         Free Energy correction: 0.566628 hartree<br/>         Quasiharmonic Free Energy correction: 0.583865 hartree</p> <p>SCF Energy: -1873.470212 hartree<br/>         SCF Energy + ZPVE: -1872.814138 hartree<br/>         Enthalpy: -1872.766991 hartree<br/>         Free Energy: -1872.903584 hartree</p> <p>Free Energy with quasiharmonic correction: -1872.886346 hartree<br/>         (correction: 10.82 kcal/mol)</p> <p><b>B3LYP-D3/6-311+G(d,p)</b></p> <p>SCF Done: E(RB3LYP) = -1874.15771546 A.U.</p> |                          |                   |
| Cartesian<br>Coordinates                       | 79<br>spD3-TS3-T4.out                                                                                                                                                                                                                                                                                                                                                                                                                                                                                                                                                                                                                                                                                                      | Energy: -1176051.7128506 |                   |
|                                                | O                                                                                                                                                                                                                                                                                                                                                                                                                                                                                                                                                                                                                                                                                                                          | 1.81942                  | -1.57467 1.44990  |
|                                                | C                                                                                                                                                                                                                                                                                                                                                                                                                                                                                                                                                                                                                                                                                                                          | 8.44556                  | -0.74271 -1.09112 |
|                                                | O                                                                                                                                                                                                                                                                                                                                                                                                                                                                                                                                                                                                                                                                                                                          | 7.66037                  | -1.62664 -0.78499 |
|                                                | O                                                                                                                                                                                                                                                                                                                                                                                                                                                                                                                                                                                                                                                                                                                          | 8.16804                  | 0.55583 -1.10638  |
|                                                | C                                                                                                                                                                                                                                                                                                                                                                                                                                                                                                                                                                                                                                                                                                                          | 4.78189                  | 2.03663 -0.20242  |
|                                                | C                                                                                                                                                                                                                                                                                                                                                                                                                                                                                                                                                                                                                                                                                                                          | 3.54326                  | 1.59264 0.19524   |
|                                                | N                                                                                                                                                                                                                                                                                                                                                                                                                                                                                                                                                                                                                                                                                                                          | 5.61409                  | 0.94488 -0.36815  |
|                                                | C                                                                                                                                                                                                                                                                                                                                                                                                                                                                                                                                                                                                                                                                                                                          | 4.88766                  | -0.12434 -0.07341 |
|                                                | N                                                                                                                                                                                                                                                                                                                                                                                                                                                                                                                                                                                                                                                                                                                          | 3.62771                  | 0.21953 0.27100   |
|                                                | C                                                                                                                                                                                                                                                                                                                                                                                                                                                                                                                                                                                                                                                                                                                          | 9.88100                  | -1.01735 -1.50492 |
|                                                | C                                                                                                                                                                                                                                                                                                                                                                                                                                                                                                                                                                                                                                                                                                                          | 5.25293                  | 3.43677 -0.44295  |
|                                                | C                                                                                                                                                                                                                                                                                                                                                                                                                                                                                                                                                                                                                                                                                                                          | 0.51931                  | -2.03540 0.96491  |
|                                                | C                                                                                                                                                                                                                                                                                                                                                                                                                                                                                                                                                                                                                                                                                                                          | -0.55433                 | -0.08276 -0.23841 |
|                                                | O                                                                                                                                                                                                                                                                                                                                                                                                                                                                                                                                                                                                                                                                                                                          | -1.47765                 | 0.60207 -0.67448  |
|                                                | C                                                                                                                                                                                                                                                                                                                                                                                                                                                                                                                                                                                                                                                                                                                          | 1.97625                  | -1.42633 2.86097  |
|                                                | C                                                                                                                                                                                                                                                                                                                                                                                                                                                                                                                                                                                                                                                                                                                          | -0.55902                 | -0.92905 0.95612  |
|                                                | C                                                                                                                                                                                                                                                                                                                                                                                                                                                                                                                                                                                                                                                                                                                          | -1.98072                 | -1.29364 1.44538  |
|                                                | C                                                                                                                                                                                                                                                                                                                                                                                                                                                                                                                                                                                                                                                                                                                          | -2.92547                 | -1.99296 0.46796  |
|                                                | O                                                                                                                                                                                                                                                                                                                                                                                                                                                                                                                                                                                                                                                                                                                          | -2.67880                 | -0.15896 1.98196  |
|                                                | C                                                                                                                                                                                                                                                                                                                                                                                                                                                                                                                                                                                                                                                                                                                          | -4.29146                 | -2.07553 0.78121  |
|                                                | C                                                                                                                                                                                                                                                                                                                                                                                                                                                                                                                                                                                                                                                                                                                          | -2.47793                 | -2.63509 -0.69224 |
|                                                | C                                                                                                                                                                                                                                                                                                                                                                                                                                                                                                                                                                                                                                                                                                                          | -5.17918                 | -2.76793 -0.04162 |
|                                                | C                                                                                                                                                                                                                                                                                                                                                                                                                                                                                                                                                                                                                                                                                                                          | -3.36246                 | -3.33755 -1.51544 |
|                                                | C                                                                                                                                                                                                                                                                                                                                                                                                                                                                                                                                                                                                                                                                                                                          | -4.71812                 | -3.40518 -1.19586 |
|                                                | H                                                                                                                                                                                                                                                                                                                                                                                                                                                                                                                                                                                                                                                                                                                          | -0.28421                 | -0.06780 1.97245  |
|                                                | O                                                                                                                                                                                                                                                                                                                                                                                                                                                                                                                                                                                                                                                                                                                          | 0.67349                  | -0.04287 -0.86794 |
|                                                | C                                                                                                                                                                                                                                                                                                                                                                                                                                                                                                                                                                                                                                                                                                                          | 0.74096                  | 0.79959 -2.01886  |

|   |          |          |          |
|---|----------|----------|----------|
| C | 0.14868  | -3.34244 | 1.67666  |
| C | -5.36555 | 0.88450  | -1.65750 |
| O | -6.36874 | 0.63802  | -2.32874 |
| C | -5.52907 | 1.39950  | -0.21741 |
| N | -4.32608 | 1.80646  | 0.47411  |
| C | -3.97186 | 3.12114  | 0.55746  |
| O | -4.64965 | 4.03743  | 0.09269  |
| C | -2.67154 | 3.38546  | 1.30197  |
| N | -4.09260 | 0.73135  | -2.09281 |
| C | -3.79062 | 0.19633  | -3.40246 |
| H | -2.98847 | -3.82440 | -2.41354 |
| H | -5.40980 | -3.94042 | -1.84155 |
| H | -6.23515 | -2.80652 | 0.21552  |
| H | -4.64903 | -1.58016 | 1.67852  |
| H | -1.42882 | -2.57870 | -0.96705 |
| H | -0.71256 | -3.81463 | 1.19424  |
| H | -0.09682 | -3.19681 | 2.73316  |
| H | 0.99701  | -4.03400 | 1.61759  |
| H | 2.06779  | -2.40322 | 3.35696  |
| H | -1.84051 | -1.99973 | 2.27801  |
| H | 1.15483  | -0.84971 | 3.30217  |
| H | 2.91572  | -0.88253 | 3.00356  |
| H | 0.77598  | -2.29725 | -0.06668 |
| H | 2.86797  | -0.41827 | 0.55724  |
| H | 2.62979  | 2.11594  | 0.43421  |
| H | 6.09464  | 3.69473  | 0.21219  |
| H | 5.59560  | 3.57339  | -1.47648 |
| H | 4.44768  | 4.15469  | -0.25656 |
| H | 5.25850  | -1.13868 | -0.10771 |
| H | 7.19186  | 0.71407  | -0.82346 |
| H | -2.09344 | 2.47897  | 1.48758  |
| H | -2.89854 | 3.87002  | 2.25896  |
| H | -2.07143 | 4.08707  | 0.71491  |
| H | -3.71905 | 1.09666  | 0.89372  |
| H | -6.20017 | 2.26012  | -0.26682 |
| H | -6.03450 | 0.60605  | 0.34502  |
| H | -3.32079 | 0.85983  | -1.44398 |
| H | -3.12702 | 0.87171  | -3.95768 |
| H | -3.30577 | -0.78481 | -3.32567 |
| H | 10.06426 | -0.61870 | -2.50868 |
| H | 1.77506  | 0.74436  | -2.36379 |
| H | 0.05784  | 0.45298  | -2.80137 |
| H | 10.57066 | -0.50715 | -0.82351 |
| H | 0.47962  | 1.83218  | -1.76843 |
| H | 10.07299 | -2.09138 | -1.49097 |
| H | -4.73218 | 0.08901  | -3.94453 |
| O | -0.38955 | 0.64549  | 3.03022  |
| H | -2.00559 | 0.31771  | 2.54356  |
| C | 0.32026  | 1.83791  | 2.90464  |
| H | 1.37458  | 1.73953  | 3.23297  |
| H | -0.12766 | 2.64006  | 3.51770  |
| H | 0.34928  | 2.22139  | 1.86403  |

Optimized Molecular Properties for **T4-INT3**

|                                                |                                                                                                                                                                                                                                                                                                                                                                                                                                                                                                                                                                                                                                                                                                                                                                                                                                                                                                                                                                                                                                                                                                                                                                                                                                                                                                                                                                                                                                                                                                                                                                                                                                                                                                                                                                                                                                                                                                                                                                                                                                                       |          |          |          |          |   |         |         |          |   |         |         |          |   |         |         |          |   |         |          |         |   |         |          |         |   |         |          |         |   |         |          |          |   |         |          |         |   |         |         |          |   |         |          |         |   |         |          |          |   |          |         |          |   |          |         |          |   |         |          |         |   |          |          |          |   |          |          |         |   |          |          |          |   |          |          |         |   |          |          |          |   |          |          |          |   |          |          |          |   |          |          |          |   |          |          |          |   |         |          |         |   |         |         |          |   |         |         |          |
|------------------------------------------------|-------------------------------------------------------------------------------------------------------------------------------------------------------------------------------------------------------------------------------------------------------------------------------------------------------------------------------------------------------------------------------------------------------------------------------------------------------------------------------------------------------------------------------------------------------------------------------------------------------------------------------------------------------------------------------------------------------------------------------------------------------------------------------------------------------------------------------------------------------------------------------------------------------------------------------------------------------------------------------------------------------------------------------------------------------------------------------------------------------------------------------------------------------------------------------------------------------------------------------------------------------------------------------------------------------------------------------------------------------------------------------------------------------------------------------------------------------------------------------------------------------------------------------------------------------------------------------------------------------------------------------------------------------------------------------------------------------------------------------------------------------------------------------------------------------------------------------------------------------------------------------------------------------------------------------------------------------------------------------------------------------------------------------------------------------|----------|----------|----------|----------|---|---------|---------|----------|---|---------|---------|----------|---|---------|---------|----------|---|---------|----------|---------|---|---------|----------|---------|---|---------|----------|---------|---|---------|----------|----------|---|---------|----------|---------|---|---------|---------|----------|---|---------|----------|---------|---|---------|----------|----------|---|----------|---------|----------|---|----------|---------|----------|---|---------|----------|---------|---|----------|----------|----------|---|----------|----------|---------|---|----------|----------|----------|---|----------|----------|---------|---|----------|----------|----------|---|----------|----------|----------|---|----------|----------|----------|---|----------|----------|----------|---|----------|----------|----------|---|---------|----------|---------|---|---------|---------|----------|---|---------|---------|----------|
| Number of<br>(-)<br>Vibrational<br>Frequencies | 0                                                                                                                                                                                                                                                                                                                                                                                                                                                                                                                                                                                                                                                                                                                                                                                                                                                                                                                                                                                                                                                                                                                                                                                                                                                                                                                                                                                                                                                                                                                                                                                                                                                                                                                                                                                                                                                                                                                                                                                                                                                     |          |          |          |          |   |         |         |          |   |         |         |          |   |         |         |          |   |         |          |         |   |         |          |         |   |         |          |         |   |         |          |          |   |         |          |         |   |         |         |          |   |         |          |         |   |         |          |          |   |          |         |          |   |          |         |          |   |         |          |         |   |          |          |          |   |          |          |         |   |          |          |          |   |          |          |         |   |          |          |          |   |          |          |          |   |          |          |          |   |          |          |          |   |          |          |          |   |         |          |         |   |         |         |          |   |         |         |          |
| Absolute<br>Energies<br>(Hartrees)             | <p><b>B3LYP/6-31G(d)</b></p> <p>There are 26 positive frequencies below 100 cm<sup>-1</sup>.</p> <p>Zero-point correction: 0.659015 hartree<br/>         Enthalpy correction: 0.707739 hartree<br/>         Free Energy correction: 0.566629 hartree<br/>         Quasiharmonic Free Energy correction: 0.585013 hartree</p> <p>SCF Energy: -1873.480568 hartree<br/>         SCF Energy + ZPVE: -1872.821553 hartree<br/>         Enthalpy: -1872.772829 hartree<br/>         Free Energy: -1872.913939 hartree</p> <p>Free Energy with quasiharmonic correction: -1872.895555 hartree<br/>         (correction: 11.54 kcal/mol)</p> <p><b>B3LYP-D3/6-311+G(d,p)</b></p> <p>SCF Done: E(RB3LYP) = -1874.17230081 A.U.</p>                                                                                                                                                                                                                                                                                                                                                                                                                                                                                                                                                                                                                                                                                                                                                                                                                                                                                                                                                                                                                                                                                                                                                                                                                                                                                                                            |          |          |          |          |   |         |         |          |   |         |         |          |   |         |         |          |   |         |          |         |   |         |          |         |   |         |          |         |   |         |          |          |   |         |          |         |   |         |         |          |   |         |          |         |   |         |          |          |   |          |         |          |   |          |         |          |   |         |          |         |   |          |          |          |   |          |          |         |   |          |          |          |   |          |          |         |   |          |          |          |   |          |          |          |   |          |          |          |   |          |          |          |   |          |          |          |   |         |          |         |   |         |         |          |   |         |         |          |
| Cartesian<br>Coordinates                       | <p>79<br/>spD3-INT3-T4.out Energy: -1176060.8652958</p> <table> <tbody> <tr><td>O</td><td>1.57395</td><td>-2.85062</td><td>-0.04385</td></tr> <tr><td>C</td><td>5.76204</td><td>2.99971</td><td>-1.20926</td></tr> <tr><td>O</td><td>4.60592</td><td>2.64527</td><td>-1.37595</td></tr> <tr><td>O</td><td>6.71155</td><td>2.25759</td><td>-0.64907</td></tr> <tr><td>C</td><td>6.21788</td><td>-1.30852</td><td>0.55701</td></tr> <tr><td>C</td><td>5.20803</td><td>-2.23317</td><td>0.67450</td></tr> <tr><td>N</td><td>5.69054</td><td>-0.13556</td><td>0.05134</td></tr> <tr><td>C</td><td>4.39512</td><td>-0.35546</td><td>-0.12686</td></tr> <tr><td>N</td><td>4.05757</td><td>-1.61140</td><td>0.23920</td></tr> <tr><td>C</td><td>6.28054</td><td>4.36397</td><td>-1.62660</td></tr> <tr><td>C</td><td>7.67054</td><td>-1.44487</td><td>0.89080</td></tr> <tr><td>C</td><td>0.56844</td><td>-2.22110</td><td>-0.97317</td></tr> <tr><td>C</td><td>-0.30047</td><td>0.07476</td><td>-0.38558</td></tr> <tr><td>O</td><td>-1.13606</td><td>0.94426</td><td>-0.06388</td></tr> <tr><td>C</td><td>1.09295</td><td>-3.79311</td><td>0.89576</td></tr> <tr><td>C</td><td>-0.44473</td><td>-1.33044</td><td>-0.32655</td></tr> <tr><td>C</td><td>-1.75634</td><td>-1.89570</td><td>0.17735</td></tr> <tr><td>C</td><td>-2.99798</td><td>-1.75148</td><td>-0.71336</td></tr> <tr><td>O</td><td>-2.15576</td><td>-1.40863</td><td>1.48737</td></tr> <tr><td>C</td><td>-4.23464</td><td>-2.21908</td><td>-0.24032</td></tr> <tr><td>C</td><td>-2.93976</td><td>-1.23476</td><td>-2.01011</td></tr> <tr><td>C</td><td>-5.37699</td><td>-2.16634</td><td>-1.03918</td></tr> <tr><td>C</td><td>-4.08060</td><td>-1.18184</td><td>-2.81525</td></tr> <tr><td>C</td><td>-5.30457</td><td>-1.64565</td><td>-2.33389</td></tr> <tr><td>H</td><td>0.59435</td><td>-1.12007</td><td>1.53049</td></tr> <tr><td>O</td><td>0.96752</td><td>0.50842</td><td>-0.81142</td></tr> <tr><td>C</td><td>1.08343</td><td>1.91381</td><td>-1.02752</td></tr> </tbody> </table> | O        | 1.57395  | -2.85062 | -0.04385 | C | 5.76204 | 2.99971 | -1.20926 | O | 4.60592 | 2.64527 | -1.37595 | O | 6.71155 | 2.25759 | -0.64907 | C | 6.21788 | -1.30852 | 0.55701 | C | 5.20803 | -2.23317 | 0.67450 | N | 5.69054 | -0.13556 | 0.05134 | C | 4.39512 | -0.35546 | -0.12686 | N | 4.05757 | -1.61140 | 0.23920 | C | 6.28054 | 4.36397 | -1.62660 | C | 7.67054 | -1.44487 | 0.89080 | C | 0.56844 | -2.22110 | -0.97317 | C | -0.30047 | 0.07476 | -0.38558 | O | -1.13606 | 0.94426 | -0.06388 | C | 1.09295 | -3.79311 | 0.89576 | C | -0.44473 | -1.33044 | -0.32655 | C | -1.75634 | -1.89570 | 0.17735 | C | -2.99798 | -1.75148 | -0.71336 | O | -2.15576 | -1.40863 | 1.48737 | C | -4.23464 | -2.21908 | -0.24032 | C | -2.93976 | -1.23476 | -2.01011 | C | -5.37699 | -2.16634 | -1.03918 | C | -4.08060 | -1.18184 | -2.81525 | C | -5.30457 | -1.64565 | -2.33389 | H | 0.59435 | -1.12007 | 1.53049 | O | 0.96752 | 0.50842 | -0.81142 | C | 1.08343 | 1.91381 | -1.02752 |
| O                                              | 1.57395                                                                                                                                                                                                                                                                                                                                                                                                                                                                                                                                                                                                                                                                                                                                                                                                                                                                                                                                                                                                                                                                                                                                                                                                                                                                                                                                                                                                                                                                                                                                                                                                                                                                                                                                                                                                                                                                                                                                                                                                                                               | -2.85062 | -0.04385 |          |          |   |         |         |          |   |         |         |          |   |         |         |          |   |         |          |         |   |         |          |         |   |         |          |         |   |         |          |          |   |         |          |         |   |         |         |          |   |         |          |         |   |         |          |          |   |          |         |          |   |          |         |          |   |         |          |         |   |          |          |          |   |          |          |         |   |          |          |          |   |          |          |         |   |          |          |          |   |          |          |          |   |          |          |          |   |          |          |          |   |          |          |          |   |         |          |         |   |         |         |          |   |         |         |          |
| C                                              | 5.76204                                                                                                                                                                                                                                                                                                                                                                                                                                                                                                                                                                                                                                                                                                                                                                                                                                                                                                                                                                                                                                                                                                                                                                                                                                                                                                                                                                                                                                                                                                                                                                                                                                                                                                                                                                                                                                                                                                                                                                                                                                               | 2.99971  | -1.20926 |          |          |   |         |         |          |   |         |         |          |   |         |         |          |   |         |          |         |   |         |          |         |   |         |          |         |   |         |          |          |   |         |          |         |   |         |         |          |   |         |          |         |   |         |          |          |   |          |         |          |   |          |         |          |   |         |          |         |   |          |          |          |   |          |          |         |   |          |          |          |   |          |          |         |   |          |          |          |   |          |          |          |   |          |          |          |   |          |          |          |   |          |          |          |   |         |          |         |   |         |         |          |   |         |         |          |
| O                                              | 4.60592                                                                                                                                                                                                                                                                                                                                                                                                                                                                                                                                                                                                                                                                                                                                                                                                                                                                                                                                                                                                                                                                                                                                                                                                                                                                                                                                                                                                                                                                                                                                                                                                                                                                                                                                                                                                                                                                                                                                                                                                                                               | 2.64527  | -1.37595 |          |          |   |         |         |          |   |         |         |          |   |         |         |          |   |         |          |         |   |         |          |         |   |         |          |         |   |         |          |          |   |         |          |         |   |         |         |          |   |         |          |         |   |         |          |          |   |          |         |          |   |          |         |          |   |         |          |         |   |          |          |          |   |          |          |         |   |          |          |          |   |          |          |         |   |          |          |          |   |          |          |          |   |          |          |          |   |          |          |          |   |          |          |          |   |         |          |         |   |         |         |          |   |         |         |          |
| O                                              | 6.71155                                                                                                                                                                                                                                                                                                                                                                                                                                                                                                                                                                                                                                                                                                                                                                                                                                                                                                                                                                                                                                                                                                                                                                                                                                                                                                                                                                                                                                                                                                                                                                                                                                                                                                                                                                                                                                                                                                                                                                                                                                               | 2.25759  | -0.64907 |          |          |   |         |         |          |   |         |         |          |   |         |         |          |   |         |          |         |   |         |          |         |   |         |          |         |   |         |          |          |   |         |          |         |   |         |         |          |   |         |          |         |   |         |          |          |   |          |         |          |   |          |         |          |   |         |          |         |   |          |          |          |   |          |          |         |   |          |          |          |   |          |          |         |   |          |          |          |   |          |          |          |   |          |          |          |   |          |          |          |   |          |          |          |   |         |          |         |   |         |         |          |   |         |         |          |
| C                                              | 6.21788                                                                                                                                                                                                                                                                                                                                                                                                                                                                                                                                                                                                                                                                                                                                                                                                                                                                                                                                                                                                                                                                                                                                                                                                                                                                                                                                                                                                                                                                                                                                                                                                                                                                                                                                                                                                                                                                                                                                                                                                                                               | -1.30852 | 0.55701  |          |          |   |         |         |          |   |         |         |          |   |         |         |          |   |         |          |         |   |         |          |         |   |         |          |         |   |         |          |          |   |         |          |         |   |         |         |          |   |         |          |         |   |         |          |          |   |          |         |          |   |          |         |          |   |         |          |         |   |          |          |          |   |          |          |         |   |          |          |          |   |          |          |         |   |          |          |          |   |          |          |          |   |          |          |          |   |          |          |          |   |          |          |          |   |         |          |         |   |         |         |          |   |         |         |          |
| C                                              | 5.20803                                                                                                                                                                                                                                                                                                                                                                                                                                                                                                                                                                                                                                                                                                                                                                                                                                                                                                                                                                                                                                                                                                                                                                                                                                                                                                                                                                                                                                                                                                                                                                                                                                                                                                                                                                                                                                                                                                                                                                                                                                               | -2.23317 | 0.67450  |          |          |   |         |         |          |   |         |         |          |   |         |         |          |   |         |          |         |   |         |          |         |   |         |          |         |   |         |          |          |   |         |          |         |   |         |         |          |   |         |          |         |   |         |          |          |   |          |         |          |   |          |         |          |   |         |          |         |   |          |          |          |   |          |          |         |   |          |          |          |   |          |          |         |   |          |          |          |   |          |          |          |   |          |          |          |   |          |          |          |   |          |          |          |   |         |          |         |   |         |         |          |   |         |         |          |
| N                                              | 5.69054                                                                                                                                                                                                                                                                                                                                                                                                                                                                                                                                                                                                                                                                                                                                                                                                                                                                                                                                                                                                                                                                                                                                                                                                                                                                                                                                                                                                                                                                                                                                                                                                                                                                                                                                                                                                                                                                                                                                                                                                                                               | -0.13556 | 0.05134  |          |          |   |         |         |          |   |         |         |          |   |         |         |          |   |         |          |         |   |         |          |         |   |         |          |         |   |         |          |          |   |         |          |         |   |         |         |          |   |         |          |         |   |         |          |          |   |          |         |          |   |          |         |          |   |         |          |         |   |          |          |          |   |          |          |         |   |          |          |          |   |          |          |         |   |          |          |          |   |          |          |          |   |          |          |          |   |          |          |          |   |          |          |          |   |         |          |         |   |         |         |          |   |         |         |          |
| C                                              | 4.39512                                                                                                                                                                                                                                                                                                                                                                                                                                                                                                                                                                                                                                                                                                                                                                                                                                                                                                                                                                                                                                                                                                                                                                                                                                                                                                                                                                                                                                                                                                                                                                                                                                                                                                                                                                                                                                                                                                                                                                                                                                               | -0.35546 | -0.12686 |          |          |   |         |         |          |   |         |         |          |   |         |         |          |   |         |          |         |   |         |          |         |   |         |          |         |   |         |          |          |   |         |          |         |   |         |         |          |   |         |          |         |   |         |          |          |   |          |         |          |   |          |         |          |   |         |          |         |   |          |          |          |   |          |          |         |   |          |          |          |   |          |          |         |   |          |          |          |   |          |          |          |   |          |          |          |   |          |          |          |   |          |          |          |   |         |          |         |   |         |         |          |   |         |         |          |
| N                                              | 4.05757                                                                                                                                                                                                                                                                                                                                                                                                                                                                                                                                                                                                                                                                                                                                                                                                                                                                                                                                                                                                                                                                                                                                                                                                                                                                                                                                                                                                                                                                                                                                                                                                                                                                                                                                                                                                                                                                                                                                                                                                                                               | -1.61140 | 0.23920  |          |          |   |         |         |          |   |         |         |          |   |         |         |          |   |         |          |         |   |         |          |         |   |         |          |         |   |         |          |          |   |         |          |         |   |         |         |          |   |         |          |         |   |         |          |          |   |          |         |          |   |          |         |          |   |         |          |         |   |          |          |          |   |          |          |         |   |          |          |          |   |          |          |         |   |          |          |          |   |          |          |          |   |          |          |          |   |          |          |          |   |          |          |          |   |         |          |         |   |         |         |          |   |         |         |          |
| C                                              | 6.28054                                                                                                                                                                                                                                                                                                                                                                                                                                                                                                                                                                                                                                                                                                                                                                                                                                                                                                                                                                                                                                                                                                                                                                                                                                                                                                                                                                                                                                                                                                                                                                                                                                                                                                                                                                                                                                                                                                                                                                                                                                               | 4.36397  | -1.62660 |          |          |   |         |         |          |   |         |         |          |   |         |         |          |   |         |          |         |   |         |          |         |   |         |          |         |   |         |          |          |   |         |          |         |   |         |         |          |   |         |          |         |   |         |          |          |   |          |         |          |   |          |         |          |   |         |          |         |   |          |          |          |   |          |          |         |   |          |          |          |   |          |          |         |   |          |          |          |   |          |          |          |   |          |          |          |   |          |          |          |   |          |          |          |   |         |          |         |   |         |         |          |   |         |         |          |
| C                                              | 7.67054                                                                                                                                                                                                                                                                                                                                                                                                                                                                                                                                                                                                                                                                                                                                                                                                                                                                                                                                                                                                                                                                                                                                                                                                                                                                                                                                                                                                                                                                                                                                                                                                                                                                                                                                                                                                                                                                                                                                                                                                                                               | -1.44487 | 0.89080  |          |          |   |         |         |          |   |         |         |          |   |         |         |          |   |         |          |         |   |         |          |         |   |         |          |         |   |         |          |          |   |         |          |         |   |         |         |          |   |         |          |         |   |         |          |          |   |          |         |          |   |          |         |          |   |         |          |         |   |          |          |          |   |          |          |         |   |          |          |          |   |          |          |         |   |          |          |          |   |          |          |          |   |          |          |          |   |          |          |          |   |          |          |          |   |         |          |         |   |         |         |          |   |         |         |          |
| C                                              | 0.56844                                                                                                                                                                                                                                                                                                                                                                                                                                                                                                                                                                                                                                                                                                                                                                                                                                                                                                                                                                                                                                                                                                                                                                                                                                                                                                                                                                                                                                                                                                                                                                                                                                                                                                                                                                                                                                                                                                                                                                                                                                               | -2.22110 | -0.97317 |          |          |   |         |         |          |   |         |         |          |   |         |         |          |   |         |          |         |   |         |          |         |   |         |          |         |   |         |          |          |   |         |          |         |   |         |         |          |   |         |          |         |   |         |          |          |   |          |         |          |   |          |         |          |   |         |          |         |   |          |          |          |   |          |          |         |   |          |          |          |   |          |          |         |   |          |          |          |   |          |          |          |   |          |          |          |   |          |          |          |   |          |          |          |   |         |          |         |   |         |         |          |   |         |         |          |
| C                                              | -0.30047                                                                                                                                                                                                                                                                                                                                                                                                                                                                                                                                                                                                                                                                                                                                                                                                                                                                                                                                                                                                                                                                                                                                                                                                                                                                                                                                                                                                                                                                                                                                                                                                                                                                                                                                                                                                                                                                                                                                                                                                                                              | 0.07476  | -0.38558 |          |          |   |         |         |          |   |         |         |          |   |         |         |          |   |         |          |         |   |         |          |         |   |         |          |         |   |         |          |          |   |         |          |         |   |         |         |          |   |         |          |         |   |         |          |          |   |          |         |          |   |          |         |          |   |         |          |         |   |          |          |          |   |          |          |         |   |          |          |          |   |          |          |         |   |          |          |          |   |          |          |          |   |          |          |          |   |          |          |          |   |          |          |          |   |         |          |         |   |         |         |          |   |         |         |          |
| O                                              | -1.13606                                                                                                                                                                                                                                                                                                                                                                                                                                                                                                                                                                                                                                                                                                                                                                                                                                                                                                                                                                                                                                                                                                                                                                                                                                                                                                                                                                                                                                                                                                                                                                                                                                                                                                                                                                                                                                                                                                                                                                                                                                              | 0.94426  | -0.06388 |          |          |   |         |         |          |   |         |         |          |   |         |         |          |   |         |          |         |   |         |          |         |   |         |          |         |   |         |          |          |   |         |          |         |   |         |         |          |   |         |          |         |   |         |          |          |   |          |         |          |   |          |         |          |   |         |          |         |   |          |          |          |   |          |          |         |   |          |          |          |   |          |          |         |   |          |          |          |   |          |          |          |   |          |          |          |   |          |          |          |   |          |          |          |   |         |          |         |   |         |         |          |   |         |         |          |
| C                                              | 1.09295                                                                                                                                                                                                                                                                                                                                                                                                                                                                                                                                                                                                                                                                                                                                                                                                                                                                                                                                                                                                                                                                                                                                                                                                                                                                                                                                                                                                                                                                                                                                                                                                                                                                                                                                                                                                                                                                                                                                                                                                                                               | -3.79311 | 0.89576  |          |          |   |         |         |          |   |         |         |          |   |         |         |          |   |         |          |         |   |         |          |         |   |         |          |         |   |         |          |          |   |         |          |         |   |         |         |          |   |         |          |         |   |         |          |          |   |          |         |          |   |          |         |          |   |         |          |         |   |          |          |          |   |          |          |         |   |          |          |          |   |          |          |         |   |          |          |          |   |          |          |          |   |          |          |          |   |          |          |          |   |          |          |          |   |         |          |         |   |         |         |          |   |         |         |          |
| C                                              | -0.44473                                                                                                                                                                                                                                                                                                                                                                                                                                                                                                                                                                                                                                                                                                                                                                                                                                                                                                                                                                                                                                                                                                                                                                                                                                                                                                                                                                                                                                                                                                                                                                                                                                                                                                                                                                                                                                                                                                                                                                                                                                              | -1.33044 | -0.32655 |          |          |   |         |         |          |   |         |         |          |   |         |         |          |   |         |          |         |   |         |          |         |   |         |          |         |   |         |          |          |   |         |          |         |   |         |         |          |   |         |          |         |   |         |          |          |   |          |         |          |   |          |         |          |   |         |          |         |   |          |          |          |   |          |          |         |   |          |          |          |   |          |          |         |   |          |          |          |   |          |          |          |   |          |          |          |   |          |          |          |   |          |          |          |   |         |          |         |   |         |         |          |   |         |         |          |
| C                                              | -1.75634                                                                                                                                                                                                                                                                                                                                                                                                                                                                                                                                                                                                                                                                                                                                                                                                                                                                                                                                                                                                                                                                                                                                                                                                                                                                                                                                                                                                                                                                                                                                                                                                                                                                                                                                                                                                                                                                                                                                                                                                                                              | -1.89570 | 0.17735  |          |          |   |         |         |          |   |         |         |          |   |         |         |          |   |         |          |         |   |         |          |         |   |         |          |         |   |         |          |          |   |         |          |         |   |         |         |          |   |         |          |         |   |         |          |          |   |          |         |          |   |          |         |          |   |         |          |         |   |          |          |          |   |          |          |         |   |          |          |          |   |          |          |         |   |          |          |          |   |          |          |          |   |          |          |          |   |          |          |          |   |          |          |          |   |         |          |         |   |         |         |          |   |         |         |          |
| C                                              | -2.99798                                                                                                                                                                                                                                                                                                                                                                                                                                                                                                                                                                                                                                                                                                                                                                                                                                                                                                                                                                                                                                                                                                                                                                                                                                                                                                                                                                                                                                                                                                                                                                                                                                                                                                                                                                                                                                                                                                                                                                                                                                              | -1.75148 | -0.71336 |          |          |   |         |         |          |   |         |         |          |   |         |         |          |   |         |          |         |   |         |          |         |   |         |          |         |   |         |          |          |   |         |          |         |   |         |         |          |   |         |          |         |   |         |          |          |   |          |         |          |   |          |         |          |   |         |          |         |   |          |          |          |   |          |          |         |   |          |          |          |   |          |          |         |   |          |          |          |   |          |          |          |   |          |          |          |   |          |          |          |   |          |          |          |   |         |          |         |   |         |         |          |   |         |         |          |
| O                                              | -2.15576                                                                                                                                                                                                                                                                                                                                                                                                                                                                                                                                                                                                                                                                                                                                                                                                                                                                                                                                                                                                                                                                                                                                                                                                                                                                                                                                                                                                                                                                                                                                                                                                                                                                                                                                                                                                                                                                                                                                                                                                                                              | -1.40863 | 1.48737  |          |          |   |         |         |          |   |         |         |          |   |         |         |          |   |         |          |         |   |         |          |         |   |         |          |         |   |         |          |          |   |         |          |         |   |         |         |          |   |         |          |         |   |         |          |          |   |          |         |          |   |          |         |          |   |         |          |         |   |          |          |          |   |          |          |         |   |          |          |          |   |          |          |         |   |          |          |          |   |          |          |          |   |          |          |          |   |          |          |          |   |          |          |          |   |         |          |         |   |         |         |          |   |         |         |          |
| C                                              | -4.23464                                                                                                                                                                                                                                                                                                                                                                                                                                                                                                                                                                                                                                                                                                                                                                                                                                                                                                                                                                                                                                                                                                                                                                                                                                                                                                                                                                                                                                                                                                                                                                                                                                                                                                                                                                                                                                                                                                                                                                                                                                              | -2.21908 | -0.24032 |          |          |   |         |         |          |   |         |         |          |   |         |         |          |   |         |          |         |   |         |          |         |   |         |          |         |   |         |          |          |   |         |          |         |   |         |         |          |   |         |          |         |   |         |          |          |   |          |         |          |   |          |         |          |   |         |          |         |   |          |          |          |   |          |          |         |   |          |          |          |   |          |          |         |   |          |          |          |   |          |          |          |   |          |          |          |   |          |          |          |   |          |          |          |   |         |          |         |   |         |         |          |   |         |         |          |
| C                                              | -2.93976                                                                                                                                                                                                                                                                                                                                                                                                                                                                                                                                                                                                                                                                                                                                                                                                                                                                                                                                                                                                                                                                                                                                                                                                                                                                                                                                                                                                                                                                                                                                                                                                                                                                                                                                                                                                                                                                                                                                                                                                                                              | -1.23476 | -2.01011 |          |          |   |         |         |          |   |         |         |          |   |         |         |          |   |         |          |         |   |         |          |         |   |         |          |         |   |         |          |          |   |         |          |         |   |         |         |          |   |         |          |         |   |         |          |          |   |          |         |          |   |          |         |          |   |         |          |         |   |          |          |          |   |          |          |         |   |          |          |          |   |          |          |         |   |          |          |          |   |          |          |          |   |          |          |          |   |          |          |          |   |          |          |          |   |         |          |         |   |         |         |          |   |         |         |          |
| C                                              | -5.37699                                                                                                                                                                                                                                                                                                                                                                                                                                                                                                                                                                                                                                                                                                                                                                                                                                                                                                                                                                                                                                                                                                                                                                                                                                                                                                                                                                                                                                                                                                                                                                                                                                                                                                                                                                                                                                                                                                                                                                                                                                              | -2.16634 | -1.03918 |          |          |   |         |         |          |   |         |         |          |   |         |         |          |   |         |          |         |   |         |          |         |   |         |          |         |   |         |          |          |   |         |          |         |   |         |         |          |   |         |          |         |   |         |          |          |   |          |         |          |   |          |         |          |   |         |          |         |   |          |          |          |   |          |          |         |   |          |          |          |   |          |          |         |   |          |          |          |   |          |          |          |   |          |          |          |   |          |          |          |   |          |          |          |   |         |          |         |   |         |         |          |   |         |         |          |
| C                                              | -4.08060                                                                                                                                                                                                                                                                                                                                                                                                                                                                                                                                                                                                                                                                                                                                                                                                                                                                                                                                                                                                                                                                                                                                                                                                                                                                                                                                                                                                                                                                                                                                                                                                                                                                                                                                                                                                                                                                                                                                                                                                                                              | -1.18184 | -2.81525 |          |          |   |         |         |          |   |         |         |          |   |         |         |          |   |         |          |         |   |         |          |         |   |         |          |         |   |         |          |          |   |         |          |         |   |         |         |          |   |         |          |         |   |         |          |          |   |          |         |          |   |          |         |          |   |         |          |         |   |          |          |          |   |          |          |         |   |          |          |          |   |          |          |         |   |          |          |          |   |          |          |          |   |          |          |          |   |          |          |          |   |          |          |          |   |         |          |         |   |         |         |          |   |         |         |          |
| C                                              | -5.30457                                                                                                                                                                                                                                                                                                                                                                                                                                                                                                                                                                                                                                                                                                                                                                                                                                                                                                                                                                                                                                                                                                                                                                                                                                                                                                                                                                                                                                                                                                                                                                                                                                                                                                                                                                                                                                                                                                                                                                                                                                              | -1.64565 | -2.33389 |          |          |   |         |         |          |   |         |         |          |   |         |         |          |   |         |          |         |   |         |          |         |   |         |          |         |   |         |          |          |   |         |          |         |   |         |         |          |   |         |          |         |   |         |          |          |   |          |         |          |   |          |         |          |   |         |          |         |   |          |          |          |   |          |          |         |   |          |          |          |   |          |          |         |   |          |          |          |   |          |          |          |   |          |          |          |   |          |          |          |   |          |          |          |   |         |          |         |   |         |         |          |   |         |         |          |
| H                                              | 0.59435                                                                                                                                                                                                                                                                                                                                                                                                                                                                                                                                                                                                                                                                                                                                                                                                                                                                                                                                                                                                                                                                                                                                                                                                                                                                                                                                                                                                                                                                                                                                                                                                                                                                                                                                                                                                                                                                                                                                                                                                                                               | -1.12007 | 1.53049  |          |          |   |         |         |          |   |         |         |          |   |         |         |          |   |         |          |         |   |         |          |         |   |         |          |         |   |         |          |          |   |         |          |         |   |         |         |          |   |         |          |         |   |         |          |          |   |          |         |          |   |          |         |          |   |         |          |         |   |          |          |          |   |          |          |         |   |          |          |          |   |          |          |         |   |          |          |          |   |          |          |          |   |          |          |          |   |          |          |          |   |          |          |          |   |         |          |         |   |         |         |          |   |         |         |          |
| O                                              | 0.96752                                                                                                                                                                                                                                                                                                                                                                                                                                                                                                                                                                                                                                                                                                                                                                                                                                                                                                                                                                                                                                                                                                                                                                                                                                                                                                                                                                                                                                                                                                                                                                                                                                                                                                                                                                                                                                                                                                                                                                                                                                               | 0.50842  | -0.81142 |          |          |   |         |         |          |   |         |         |          |   |         |         |          |   |         |          |         |   |         |          |         |   |         |          |         |   |         |          |          |   |         |          |         |   |         |         |          |   |         |          |         |   |         |          |          |   |          |         |          |   |          |         |          |   |         |          |         |   |          |          |          |   |          |          |         |   |          |          |          |   |          |          |         |   |          |          |          |   |          |          |          |   |          |          |          |   |          |          |          |   |          |          |          |   |         |          |         |   |         |         |          |   |         |         |          |
| C                                              | 1.08343                                                                                                                                                                                                                                                                                                                                                                                                                                                                                                                                                                                                                                                                                                                                                                                                                                                                                                                                                                                                                                                                                                                                                                                                                                                                                                                                                                                                                                                                                                                                                                                                                                                                                                                                                                                                                                                                                                                                                                                                                                               | 1.91381  | -1.02752 |          |          |   |         |         |          |   |         |         |          |   |         |         |          |   |         |          |         |   |         |          |         |   |         |          |         |   |         |          |          |   |         |          |         |   |         |         |          |   |         |          |         |   |         |          |          |   |          |         |          |   |          |         |          |   |         |          |         |   |          |          |          |   |          |          |         |   |          |          |          |   |          |          |         |   |          |          |          |   |          |          |          |   |          |          |          |   |          |          |          |   |          |          |          |   |         |          |         |   |         |         |          |   |         |         |          |

|   |          |          |          |
|---|----------|----------|----------|
| C | 0.03195  | -3.33325 | -1.88516 |
| C | -4.95141 | 2.02239  | -0.30181 |
| O | -5.95561 | 2.42921  | -0.88989 |
| C | -5.09409 | 1.31481  | 1.05716  |
| N | -3.87386 | 1.06276  | 1.79195  |
| C | -3.40897 | 1.94998  | 2.71827  |
| O | -4.03044 | 2.95189  | 3.07026  |
| C | -2.04268 | 1.59170  | 3.28644  |
| N | -3.69783 | 2.14670  | -0.79063 |
| C | -3.47606 | 2.71942  | -2.10096 |
| H | -4.01265 | -0.76670 | -3.81842 |
| H | -6.19470 | -1.59573 | -2.95617 |
| H | -6.32624 | -2.52949 | -0.65074 |
| H | -4.29433 | -2.61710 | 0.76904  |
| H | -1.98882 | -0.86499 | -2.38080 |
| H | -0.50851 | -2.89154 | -2.72822 |
| H | -0.66402 | -4.00807 | -1.37651 |
| H | 0.86162  | -3.93319 | -2.27812 |
| H | 0.67716  | -4.68554 | 0.40550  |
| H | -1.61473 | -2.98426 | 0.28326  |
| H | 0.34116  | -3.36505 | 1.56824  |
| H | 1.95044  | -4.10387 | 1.50297  |
| H | 1.23629  | -1.59609 | -1.56639 |
| H | 3.11494  | -2.03243 | 0.17470  |
| H | 5.20890  | -3.25492 | 1.02428  |
| H | 8.30210  | -1.27046 | 0.01053  |
| H | 7.97621  | -0.71893 | 1.65480  |
| H | 7.89086  | -2.44794 | 1.27121  |
| H | 3.68850  | 0.36089  | -0.51848 |
| H | 6.32604  | 1.34574  | -0.37855 |
| H | -1.72948 | 2.37794  | 3.97602  |
| H | -1.32141 | 1.49065  | 2.46884  |
| H | -2.07585 | 0.63343  | 3.81802  |
| H | -3.28555 | 0.26524  | 1.54028  |
| H | -5.74248 | 1.94378  | 1.67107  |
| H | -5.61309 | 0.36847  | 0.86893  |
| H | -2.90790 | 1.68664  | -0.33923 |
| H | -2.39810 | 2.79801  | -2.26162 |
| H | -3.91362 | 2.09898  | -2.89504 |
| H | 5.48127  | 4.93575  | -2.10041 |
| H | 2.13425  | 2.10548  | -1.25460 |
| H | 0.45817  | 2.23866  | -1.86930 |
| H | 6.65420  | 4.90466  | -0.75005 |
| H | 0.77767  | 2.47977  | -0.14286 |
| H | 7.12104  | 4.25032  | -2.31985 |
| H | -3.92977 | 3.71420  | -2.16873 |
| O | 0.58475  | -1.05570 | 2.51422  |
| H | -1.33521 | -1.21991 | 1.98479  |
| C | 1.38362  | 0.05513  | 2.89657  |
| H | 2.44367  | -0.10210 | 2.64921  |
| H | 1.29354  | 0.16441  | 3.98220  |
| H | 1.05107  | 0.98902  | 2.42457  |

Optimized Molecular Properties for **T4-TS4**

|                                                |                                                                                                                                                                                                                                                                                                                                                                                                                                                                                                                                                                                                                                                                                                                                                                                                                                                                                                                                                                                                                                                                                                                                                                                                                                                                                                                                                                                                                                                                                                                                                                                                                                                                                                                                                                                                                                                                                                                                                                                                                                         |          |          |          |         |   |         |         |          |   |         |         |          |   |         |         |          |   |         |          |         |   |         |          |         |   |         |          |          |   |         |          |          |   |         |          |         |   |         |         |          |   |         |          |         |   |         |          |          |   |          |         |          |   |          |         |          |   |         |          |         |   |          |          |          |   |          |          |         |   |          |          |          |   |          |          |         |   |          |          |          |   |          |          |          |   |          |          |          |   |          |          |          |   |          |          |          |   |         |         |          |   |         |         |          |   |         |          |          |
|------------------------------------------------|-----------------------------------------------------------------------------------------------------------------------------------------------------------------------------------------------------------------------------------------------------------------------------------------------------------------------------------------------------------------------------------------------------------------------------------------------------------------------------------------------------------------------------------------------------------------------------------------------------------------------------------------------------------------------------------------------------------------------------------------------------------------------------------------------------------------------------------------------------------------------------------------------------------------------------------------------------------------------------------------------------------------------------------------------------------------------------------------------------------------------------------------------------------------------------------------------------------------------------------------------------------------------------------------------------------------------------------------------------------------------------------------------------------------------------------------------------------------------------------------------------------------------------------------------------------------------------------------------------------------------------------------------------------------------------------------------------------------------------------------------------------------------------------------------------------------------------------------------------------------------------------------------------------------------------------------------------------------------------------------------------------------------------------------|----------|----------|----------|---------|---|---------|---------|----------|---|---------|---------|----------|---|---------|---------|----------|---|---------|----------|---------|---|---------|----------|---------|---|---------|----------|----------|---|---------|----------|----------|---|---------|----------|---------|---|---------|---------|----------|---|---------|----------|---------|---|---------|----------|----------|---|----------|---------|----------|---|----------|---------|----------|---|---------|----------|---------|---|----------|----------|----------|---|----------|----------|---------|---|----------|----------|----------|---|----------|----------|---------|---|----------|----------|----------|---|----------|----------|----------|---|----------|----------|----------|---|----------|----------|----------|---|----------|----------|----------|---|---------|---------|----------|---|---------|---------|----------|---|---------|----------|----------|
| Number of<br>(-)<br>Vibrational<br>Frequencies | 1 (-194.6013)                                                                                                                                                                                                                                                                                                                                                                                                                                                                                                                                                                                                                                                                                                                                                                                                                                                                                                                                                                                                                                                                                                                                                                                                                                                                                                                                                                                                                                                                                                                                                                                                                                                                                                                                                                                                                                                                                                                                                                                                                           |          |          |          |         |   |         |         |          |   |         |         |          |   |         |         |          |   |         |          |         |   |         |          |         |   |         |          |          |   |         |          |          |   |         |          |         |   |         |         |          |   |         |          |         |   |         |          |          |   |          |         |          |   |          |         |          |   |         |          |         |   |          |          |          |   |          |          |         |   |          |          |          |   |          |          |         |   |          |          |          |   |          |          |          |   |          |          |          |   |          |          |          |   |          |          |          |   |         |         |          |   |         |         |          |   |         |          |          |
| Absolute<br>Energies<br>(Hartrees)             | <p><b>B3LYP/6-31G(d)</b></p> <p>There are 24 positive frequencies below 100 cm<sup>-1</sup>.</p> <p>Zero-point correction: 0.657747 hartree<br/>         Enthalpy correction: 0.706006 hartree<br/>         Free Energy correction: 0.566042 hartree<br/>         Quasiharmonic Free Energy correction: 0.584344 hartree</p> <p>SCF Energy: -1873.480646 hartree<br/>         SCF Energy + ZPVE: -1872.822899 hartree<br/>         Enthalpy: -1872.774640 hartree<br/>         Free Energy: -1872.914604 hartree</p> <p>Free Energy with quasiharmonic correction: -1872.896302 hartree<br/>         (correction: 11.48 kcal/mol)</p> <p><b>B3LYP-D3/6-311+G(d,p)</b></p> <p>SCF Done: E(RB3LYP) = -1874.17069247 A.U.</p>                                                                                                                                                                                                                                                                                                                                                                                                                                                                                                                                                                                                                                                                                                                                                                                                                                                                                                                                                                                                                                                                                                                                                                                                                                                                                                              |          |          |          |         |   |         |         |          |   |         |         |          |   |         |         |          |   |         |          |         |   |         |          |         |   |         |          |          |   |         |          |          |   |         |          |         |   |         |         |          |   |         |          |         |   |         |          |          |   |          |         |          |   |          |         |          |   |         |          |         |   |          |          |          |   |          |          |         |   |          |          |          |   |          |          |         |   |          |          |          |   |          |          |          |   |          |          |          |   |          |          |          |   |          |          |          |   |         |         |          |   |         |         |          |   |         |          |          |
| Cartesian<br>Coordinates                       | <p>79</p> <p>spD3-TS4-T4.out Energy: -1176059.8560472</p> <table> <tr><td>O</td><td>1.62399</td><td>-2.49024</td><td>0.64473</td></tr> <tr><td>C</td><td>5.69627</td><td>3.13997</td><td>-1.04852</td></tr> <tr><td>O</td><td>4.52203</td><td>2.83978</td><td>-0.90197</td></tr> <tr><td>O</td><td>6.72013</td><td>2.31442</td><td>-0.86171</td></tr> <tr><td>C</td><td>6.38385</td><td>-1.31224</td><td>0.20201</td></tr> <tr><td>C</td><td>5.39278</td><td>-2.21658</td><td>0.50145</td></tr> <tr><td>N</td><td>5.79876</td><td>-0.10260</td><td>-0.11939</td></tr> <tr><td>C</td><td>4.48871</td><td>-0.28336</td><td>-0.01244</td></tr> <tr><td>N</td><td>4.19609</td><td>-1.54773</td><td>0.36189</td></tr> <tr><td>C</td><td>6.15220</td><td>4.52465</td><td>-1.47174</td></tr> <tr><td>C</td><td>7.86869</td><td>-1.50154</td><td>0.19450</td></tr> <tr><td>C</td><td>0.74244</td><td>-1.94231</td><td>-0.76793</td></tr> <tr><td>C</td><td>-0.32777</td><td>0.24855</td><td>-0.32289</td></tr> <tr><td>O</td><td>-1.25783</td><td>1.04193</td><td>-0.10269</td></tr> <tr><td>C</td><td>1.41935</td><td>-3.81033</td><td>1.10088</td></tr> <tr><td>C</td><td>-0.41078</td><td>-1.17054</td><td>-0.41864</td></tr> <tr><td>C</td><td>-1.69703</td><td>-1.84271</td><td>0.00737</td></tr> <tr><td>C</td><td>-2.89648</td><td>-1.73123</td><td>-0.93579</td></tr> <tr><td>O</td><td>-2.15255</td><td>-1.44667</td><td>1.32194</td></tr> <tr><td>C</td><td>-4.16539</td><td>-2.14333</td><td>-0.50030</td></tr> <tr><td>C</td><td>-2.75272</td><td>-1.31856</td><td>-2.26363</td></tr> <tr><td>C</td><td>-5.25864</td><td>-2.13327</td><td>-1.36712</td></tr> <tr><td>C</td><td>-3.84445</td><td>-1.30867</td><td>-3.13493</td></tr> <tr><td>C</td><td>-5.10303</td><td>-1.71484</td><td>-2.69088</td></tr> <tr><td>O</td><td>0.95291</td><td>0.76669</td><td>-0.51050</td></tr> <tr><td>C</td><td>1.02714</td><td>2.19122</td><td>-0.58687</td></tr> <tr><td>C</td><td>0.60790</td><td>-3.19449</td><td>-1.61749</td></tr> </table> | O        | 1.62399  | -2.49024 | 0.64473 | C | 5.69627 | 3.13997 | -1.04852 | O | 4.52203 | 2.83978 | -0.90197 | O | 6.72013 | 2.31442 | -0.86171 | C | 6.38385 | -1.31224 | 0.20201 | C | 5.39278 | -2.21658 | 0.50145 | N | 5.79876 | -0.10260 | -0.11939 | C | 4.48871 | -0.28336 | -0.01244 | N | 4.19609 | -1.54773 | 0.36189 | C | 6.15220 | 4.52465 | -1.47174 | C | 7.86869 | -1.50154 | 0.19450 | C | 0.74244 | -1.94231 | -0.76793 | C | -0.32777 | 0.24855 | -0.32289 | O | -1.25783 | 1.04193 | -0.10269 | C | 1.41935 | -3.81033 | 1.10088 | C | -0.41078 | -1.17054 | -0.41864 | C | -1.69703 | -1.84271 | 0.00737 | C | -2.89648 | -1.73123 | -0.93579 | O | -2.15255 | -1.44667 | 1.32194 | C | -4.16539 | -2.14333 | -0.50030 | C | -2.75272 | -1.31856 | -2.26363 | C | -5.25864 | -2.13327 | -1.36712 | C | -3.84445 | -1.30867 | -3.13493 | C | -5.10303 | -1.71484 | -2.69088 | O | 0.95291 | 0.76669 | -0.51050 | C | 1.02714 | 2.19122 | -0.58687 | C | 0.60790 | -3.19449 | -1.61749 |
| O                                              | 1.62399                                                                                                                                                                                                                                                                                                                                                                                                                                                                                                                                                                                                                                                                                                                                                                                                                                                                                                                                                                                                                                                                                                                                                                                                                                                                                                                                                                                                                                                                                                                                                                                                                                                                                                                                                                                                                                                                                                                                                                                                                                 | -2.49024 | 0.64473  |          |         |   |         |         |          |   |         |         |          |   |         |         |          |   |         |          |         |   |         |          |         |   |         |          |          |   |         |          |          |   |         |          |         |   |         |         |          |   |         |          |         |   |         |          |          |   |          |         |          |   |          |         |          |   |         |          |         |   |          |          |          |   |          |          |         |   |          |          |          |   |          |          |         |   |          |          |          |   |          |          |          |   |          |          |          |   |          |          |          |   |          |          |          |   |         |         |          |   |         |         |          |   |         |          |          |
| C                                              | 5.69627                                                                                                                                                                                                                                                                                                                                                                                                                                                                                                                                                                                                                                                                                                                                                                                                                                                                                                                                                                                                                                                                                                                                                                                                                                                                                                                                                                                                                                                                                                                                                                                                                                                                                                                                                                                                                                                                                                                                                                                                                                 | 3.13997  | -1.04852 |          |         |   |         |         |          |   |         |         |          |   |         |         |          |   |         |          |         |   |         |          |         |   |         |          |          |   |         |          |          |   |         |          |         |   |         |         |          |   |         |          |         |   |         |          |          |   |          |         |          |   |          |         |          |   |         |          |         |   |          |          |          |   |          |          |         |   |          |          |          |   |          |          |         |   |          |          |          |   |          |          |          |   |          |          |          |   |          |          |          |   |          |          |          |   |         |         |          |   |         |         |          |   |         |          |          |
| O                                              | 4.52203                                                                                                                                                                                                                                                                                                                                                                                                                                                                                                                                                                                                                                                                                                                                                                                                                                                                                                                                                                                                                                                                                                                                                                                                                                                                                                                                                                                                                                                                                                                                                                                                                                                                                                                                                                                                                                                                                                                                                                                                                                 | 2.83978  | -0.90197 |          |         |   |         |         |          |   |         |         |          |   |         |         |          |   |         |          |         |   |         |          |         |   |         |          |          |   |         |          |          |   |         |          |         |   |         |         |          |   |         |          |         |   |         |          |          |   |          |         |          |   |          |         |          |   |         |          |         |   |          |          |          |   |          |          |         |   |          |          |          |   |          |          |         |   |          |          |          |   |          |          |          |   |          |          |          |   |          |          |          |   |          |          |          |   |         |         |          |   |         |         |          |   |         |          |          |
| O                                              | 6.72013                                                                                                                                                                                                                                                                                                                                                                                                                                                                                                                                                                                                                                                                                                                                                                                                                                                                                                                                                                                                                                                                                                                                                                                                                                                                                                                                                                                                                                                                                                                                                                                                                                                                                                                                                                                                                                                                                                                                                                                                                                 | 2.31442  | -0.86171 |          |         |   |         |         |          |   |         |         |          |   |         |         |          |   |         |          |         |   |         |          |         |   |         |          |          |   |         |          |          |   |         |          |         |   |         |         |          |   |         |          |         |   |         |          |          |   |          |         |          |   |          |         |          |   |         |          |         |   |          |          |          |   |          |          |         |   |          |          |          |   |          |          |         |   |          |          |          |   |          |          |          |   |          |          |          |   |          |          |          |   |          |          |          |   |         |         |          |   |         |         |          |   |         |          |          |
| C                                              | 6.38385                                                                                                                                                                                                                                                                                                                                                                                                                                                                                                                                                                                                                                                                                                                                                                                                                                                                                                                                                                                                                                                                                                                                                                                                                                                                                                                                                                                                                                                                                                                                                                                                                                                                                                                                                                                                                                                                                                                                                                                                                                 | -1.31224 | 0.20201  |          |         |   |         |         |          |   |         |         |          |   |         |         |          |   |         |          |         |   |         |          |         |   |         |          |          |   |         |          |          |   |         |          |         |   |         |         |          |   |         |          |         |   |         |          |          |   |          |         |          |   |          |         |          |   |         |          |         |   |          |          |          |   |          |          |         |   |          |          |          |   |          |          |         |   |          |          |          |   |          |          |          |   |          |          |          |   |          |          |          |   |          |          |          |   |         |         |          |   |         |         |          |   |         |          |          |
| C                                              | 5.39278                                                                                                                                                                                                                                                                                                                                                                                                                                                                                                                                                                                                                                                                                                                                                                                                                                                                                                                                                                                                                                                                                                                                                                                                                                                                                                                                                                                                                                                                                                                                                                                                                                                                                                                                                                                                                                                                                                                                                                                                                                 | -2.21658 | 0.50145  |          |         |   |         |         |          |   |         |         |          |   |         |         |          |   |         |          |         |   |         |          |         |   |         |          |          |   |         |          |          |   |         |          |         |   |         |         |          |   |         |          |         |   |         |          |          |   |          |         |          |   |          |         |          |   |         |          |         |   |          |          |          |   |          |          |         |   |          |          |          |   |          |          |         |   |          |          |          |   |          |          |          |   |          |          |          |   |          |          |          |   |          |          |          |   |         |         |          |   |         |         |          |   |         |          |          |
| N                                              | 5.79876                                                                                                                                                                                                                                                                                                                                                                                                                                                                                                                                                                                                                                                                                                                                                                                                                                                                                                                                                                                                                                                                                                                                                                                                                                                                                                                                                                                                                                                                                                                                                                                                                                                                                                                                                                                                                                                                                                                                                                                                                                 | -0.10260 | -0.11939 |          |         |   |         |         |          |   |         |         |          |   |         |         |          |   |         |          |         |   |         |          |         |   |         |          |          |   |         |          |          |   |         |          |         |   |         |         |          |   |         |          |         |   |         |          |          |   |          |         |          |   |          |         |          |   |         |          |         |   |          |          |          |   |          |          |         |   |          |          |          |   |          |          |         |   |          |          |          |   |          |          |          |   |          |          |          |   |          |          |          |   |          |          |          |   |         |         |          |   |         |         |          |   |         |          |          |
| C                                              | 4.48871                                                                                                                                                                                                                                                                                                                                                                                                                                                                                                                                                                                                                                                                                                                                                                                                                                                                                                                                                                                                                                                                                                                                                                                                                                                                                                                                                                                                                                                                                                                                                                                                                                                                                                                                                                                                                                                                                                                                                                                                                                 | -0.28336 | -0.01244 |          |         |   |         |         |          |   |         |         |          |   |         |         |          |   |         |          |         |   |         |          |         |   |         |          |          |   |         |          |          |   |         |          |         |   |         |         |          |   |         |          |         |   |         |          |          |   |          |         |          |   |          |         |          |   |         |          |         |   |          |          |          |   |          |          |         |   |          |          |          |   |          |          |         |   |          |          |          |   |          |          |          |   |          |          |          |   |          |          |          |   |          |          |          |   |         |         |          |   |         |         |          |   |         |          |          |
| N                                              | 4.19609                                                                                                                                                                                                                                                                                                                                                                                                                                                                                                                                                                                                                                                                                                                                                                                                                                                                                                                                                                                                                                                                                                                                                                                                                                                                                                                                                                                                                                                                                                                                                                                                                                                                                                                                                                                                                                                                                                                                                                                                                                 | -1.54773 | 0.36189  |          |         |   |         |         |          |   |         |         |          |   |         |         |          |   |         |          |         |   |         |          |         |   |         |          |          |   |         |          |          |   |         |          |         |   |         |         |          |   |         |          |         |   |         |          |          |   |          |         |          |   |          |         |          |   |         |          |         |   |          |          |          |   |          |          |         |   |          |          |          |   |          |          |         |   |          |          |          |   |          |          |          |   |          |          |          |   |          |          |          |   |          |          |          |   |         |         |          |   |         |         |          |   |         |          |          |
| C                                              | 6.15220                                                                                                                                                                                                                                                                                                                                                                                                                                                                                                                                                                                                                                                                                                                                                                                                                                                                                                                                                                                                                                                                                                                                                                                                                                                                                                                                                                                                                                                                                                                                                                                                                                                                                                                                                                                                                                                                                                                                                                                                                                 | 4.52465  | -1.47174 |          |         |   |         |         |          |   |         |         |          |   |         |         |          |   |         |          |         |   |         |          |         |   |         |          |          |   |         |          |          |   |         |          |         |   |         |         |          |   |         |          |         |   |         |          |          |   |          |         |          |   |          |         |          |   |         |          |         |   |          |          |          |   |          |          |         |   |          |          |          |   |          |          |         |   |          |          |          |   |          |          |          |   |          |          |          |   |          |          |          |   |          |          |          |   |         |         |          |   |         |         |          |   |         |          |          |
| C                                              | 7.86869                                                                                                                                                                                                                                                                                                                                                                                                                                                                                                                                                                                                                                                                                                                                                                                                                                                                                                                                                                                                                                                                                                                                                                                                                                                                                                                                                                                                                                                                                                                                                                                                                                                                                                                                                                                                                                                                                                                                                                                                                                 | -1.50154 | 0.19450  |          |         |   |         |         |          |   |         |         |          |   |         |         |          |   |         |          |         |   |         |          |         |   |         |          |          |   |         |          |          |   |         |          |         |   |         |         |          |   |         |          |         |   |         |          |          |   |          |         |          |   |          |         |          |   |         |          |         |   |          |          |          |   |          |          |         |   |          |          |          |   |          |          |         |   |          |          |          |   |          |          |          |   |          |          |          |   |          |          |          |   |          |          |          |   |         |         |          |   |         |         |          |   |         |          |          |
| C                                              | 0.74244                                                                                                                                                                                                                                                                                                                                                                                                                                                                                                                                                                                                                                                                                                                                                                                                                                                                                                                                                                                                                                                                                                                                                                                                                                                                                                                                                                                                                                                                                                                                                                                                                                                                                                                                                                                                                                                                                                                                                                                                                                 | -1.94231 | -0.76793 |          |         |   |         |         |          |   |         |         |          |   |         |         |          |   |         |          |         |   |         |          |         |   |         |          |          |   |         |          |          |   |         |          |         |   |         |         |          |   |         |          |         |   |         |          |          |   |          |         |          |   |          |         |          |   |         |          |         |   |          |          |          |   |          |          |         |   |          |          |          |   |          |          |         |   |          |          |          |   |          |          |          |   |          |          |          |   |          |          |          |   |          |          |          |   |         |         |          |   |         |         |          |   |         |          |          |
| C                                              | -0.32777                                                                                                                                                                                                                                                                                                                                                                                                                                                                                                                                                                                                                                                                                                                                                                                                                                                                                                                                                                                                                                                                                                                                                                                                                                                                                                                                                                                                                                                                                                                                                                                                                                                                                                                                                                                                                                                                                                                                                                                                                                | 0.24855  | -0.32289 |          |         |   |         |         |          |   |         |         |          |   |         |         |          |   |         |          |         |   |         |          |         |   |         |          |          |   |         |          |          |   |         |          |         |   |         |         |          |   |         |          |         |   |         |          |          |   |          |         |          |   |          |         |          |   |         |          |         |   |          |          |          |   |          |          |         |   |          |          |          |   |          |          |         |   |          |          |          |   |          |          |          |   |          |          |          |   |          |          |          |   |          |          |          |   |         |         |          |   |         |         |          |   |         |          |          |
| O                                              | -1.25783                                                                                                                                                                                                                                                                                                                                                                                                                                                                                                                                                                                                                                                                                                                                                                                                                                                                                                                                                                                                                                                                                                                                                                                                                                                                                                                                                                                                                                                                                                                                                                                                                                                                                                                                                                                                                                                                                                                                                                                                                                | 1.04193  | -0.10269 |          |         |   |         |         |          |   |         |         |          |   |         |         |          |   |         |          |         |   |         |          |         |   |         |          |          |   |         |          |          |   |         |          |         |   |         |         |          |   |         |          |         |   |         |          |          |   |          |         |          |   |          |         |          |   |         |          |         |   |          |          |          |   |          |          |         |   |          |          |          |   |          |          |         |   |          |          |          |   |          |          |          |   |          |          |          |   |          |          |          |   |          |          |          |   |         |         |          |   |         |         |          |   |         |          |          |
| C                                              | 1.41935                                                                                                                                                                                                                                                                                                                                                                                                                                                                                                                                                                                                                                                                                                                                                                                                                                                                                                                                                                                                                                                                                                                                                                                                                                                                                                                                                                                                                                                                                                                                                                                                                                                                                                                                                                                                                                                                                                                                                                                                                                 | -3.81033 | 1.10088  |          |         |   |         |         |          |   |         |         |          |   |         |         |          |   |         |          |         |   |         |          |         |   |         |          |          |   |         |          |          |   |         |          |         |   |         |         |          |   |         |          |         |   |         |          |          |   |          |         |          |   |          |         |          |   |         |          |         |   |          |          |          |   |          |          |         |   |          |          |          |   |          |          |         |   |          |          |          |   |          |          |          |   |          |          |          |   |          |          |          |   |          |          |          |   |         |         |          |   |         |         |          |   |         |          |          |
| C                                              | -0.41078                                                                                                                                                                                                                                                                                                                                                                                                                                                                                                                                                                                                                                                                                                                                                                                                                                                                                                                                                                                                                                                                                                                                                                                                                                                                                                                                                                                                                                                                                                                                                                                                                                                                                                                                                                                                                                                                                                                                                                                                                                | -1.17054 | -0.41864 |          |         |   |         |         |          |   |         |         |          |   |         |         |          |   |         |          |         |   |         |          |         |   |         |          |          |   |         |          |          |   |         |          |         |   |         |         |          |   |         |          |         |   |         |          |          |   |          |         |          |   |          |         |          |   |         |          |         |   |          |          |          |   |          |          |         |   |          |          |          |   |          |          |         |   |          |          |          |   |          |          |          |   |          |          |          |   |          |          |          |   |          |          |          |   |         |         |          |   |         |         |          |   |         |          |          |
| C                                              | -1.69703                                                                                                                                                                                                                                                                                                                                                                                                                                                                                                                                                                                                                                                                                                                                                                                                                                                                                                                                                                                                                                                                                                                                                                                                                                                                                                                                                                                                                                                                                                                                                                                                                                                                                                                                                                                                                                                                                                                                                                                                                                | -1.84271 | 0.00737  |          |         |   |         |         |          |   |         |         |          |   |         |         |          |   |         |          |         |   |         |          |         |   |         |          |          |   |         |          |          |   |         |          |         |   |         |         |          |   |         |          |         |   |         |          |          |   |          |         |          |   |          |         |          |   |         |          |         |   |          |          |          |   |          |          |         |   |          |          |          |   |          |          |         |   |          |          |          |   |          |          |          |   |          |          |          |   |          |          |          |   |          |          |          |   |         |         |          |   |         |         |          |   |         |          |          |
| C                                              | -2.89648                                                                                                                                                                                                                                                                                                                                                                                                                                                                                                                                                                                                                                                                                                                                                                                                                                                                                                                                                                                                                                                                                                                                                                                                                                                                                                                                                                                                                                                                                                                                                                                                                                                                                                                                                                                                                                                                                                                                                                                                                                | -1.73123 | -0.93579 |          |         |   |         |         |          |   |         |         |          |   |         |         |          |   |         |          |         |   |         |          |         |   |         |          |          |   |         |          |          |   |         |          |         |   |         |         |          |   |         |          |         |   |         |          |          |   |          |         |          |   |          |         |          |   |         |          |         |   |          |          |          |   |          |          |         |   |          |          |          |   |          |          |         |   |          |          |          |   |          |          |          |   |          |          |          |   |          |          |          |   |          |          |          |   |         |         |          |   |         |         |          |   |         |          |          |
| O                                              | -2.15255                                                                                                                                                                                                                                                                                                                                                                                                                                                                                                                                                                                                                                                                                                                                                                                                                                                                                                                                                                                                                                                                                                                                                                                                                                                                                                                                                                                                                                                                                                                                                                                                                                                                                                                                                                                                                                                                                                                                                                                                                                | -1.44667 | 1.32194  |          |         |   |         |         |          |   |         |         |          |   |         |         |          |   |         |          |         |   |         |          |         |   |         |          |          |   |         |          |          |   |         |          |         |   |         |         |          |   |         |          |         |   |         |          |          |   |          |         |          |   |          |         |          |   |         |          |         |   |          |          |          |   |          |          |         |   |          |          |          |   |          |          |         |   |          |          |          |   |          |          |          |   |          |          |          |   |          |          |          |   |          |          |          |   |         |         |          |   |         |         |          |   |         |          |          |
| C                                              | -4.16539                                                                                                                                                                                                                                                                                                                                                                                                                                                                                                                                                                                                                                                                                                                                                                                                                                                                                                                                                                                                                                                                                                                                                                                                                                                                                                                                                                                                                                                                                                                                                                                                                                                                                                                                                                                                                                                                                                                                                                                                                                | -2.14333 | -0.50030 |          |         |   |         |         |          |   |         |         |          |   |         |         |          |   |         |          |         |   |         |          |         |   |         |          |          |   |         |          |          |   |         |          |         |   |         |         |          |   |         |          |         |   |         |          |          |   |          |         |          |   |          |         |          |   |         |          |         |   |          |          |          |   |          |          |         |   |          |          |          |   |          |          |         |   |          |          |          |   |          |          |          |   |          |          |          |   |          |          |          |   |          |          |          |   |         |         |          |   |         |         |          |   |         |          |          |
| C                                              | -2.75272                                                                                                                                                                                                                                                                                                                                                                                                                                                                                                                                                                                                                                                                                                                                                                                                                                                                                                                                                                                                                                                                                                                                                                                                                                                                                                                                                                                                                                                                                                                                                                                                                                                                                                                                                                                                                                                                                                                                                                                                                                | -1.31856 | -2.26363 |          |         |   |         |         |          |   |         |         |          |   |         |         |          |   |         |          |         |   |         |          |         |   |         |          |          |   |         |          |          |   |         |          |         |   |         |         |          |   |         |          |         |   |         |          |          |   |          |         |          |   |          |         |          |   |         |          |         |   |          |          |          |   |          |          |         |   |          |          |          |   |          |          |         |   |          |          |          |   |          |          |          |   |          |          |          |   |          |          |          |   |          |          |          |   |         |         |          |   |         |         |          |   |         |          |          |
| C                                              | -5.25864                                                                                                                                                                                                                                                                                                                                                                                                                                                                                                                                                                                                                                                                                                                                                                                                                                                                                                                                                                                                                                                                                                                                                                                                                                                                                                                                                                                                                                                                                                                                                                                                                                                                                                                                                                                                                                                                                                                                                                                                                                | -2.13327 | -1.36712 |          |         |   |         |         |          |   |         |         |          |   |         |         |          |   |         |          |         |   |         |          |         |   |         |          |          |   |         |          |          |   |         |          |         |   |         |         |          |   |         |          |         |   |         |          |          |   |          |         |          |   |          |         |          |   |         |          |         |   |          |          |          |   |          |          |         |   |          |          |          |   |          |          |         |   |          |          |          |   |          |          |          |   |          |          |          |   |          |          |          |   |          |          |          |   |         |         |          |   |         |         |          |   |         |          |          |
| C                                              | -3.84445                                                                                                                                                                                                                                                                                                                                                                                                                                                                                                                                                                                                                                                                                                                                                                                                                                                                                                                                                                                                                                                                                                                                                                                                                                                                                                                                                                                                                                                                                                                                                                                                                                                                                                                                                                                                                                                                                                                                                                                                                                | -1.30867 | -3.13493 |          |         |   |         |         |          |   |         |         |          |   |         |         |          |   |         |          |         |   |         |          |         |   |         |          |          |   |         |          |          |   |         |          |         |   |         |         |          |   |         |          |         |   |         |          |          |   |          |         |          |   |          |         |          |   |         |          |         |   |          |          |          |   |          |          |         |   |          |          |          |   |          |          |         |   |          |          |          |   |          |          |          |   |          |          |          |   |          |          |          |   |          |          |          |   |         |         |          |   |         |         |          |   |         |          |          |
| C                                              | -5.10303                                                                                                                                                                                                                                                                                                                                                                                                                                                                                                                                                                                                                                                                                                                                                                                                                                                                                                                                                                                                                                                                                                                                                                                                                                                                                                                                                                                                                                                                                                                                                                                                                                                                                                                                                                                                                                                                                                                                                                                                                                | -1.71484 | -2.69088 |          |         |   |         |         |          |   |         |         |          |   |         |         |          |   |         |          |         |   |         |          |         |   |         |          |          |   |         |          |          |   |         |          |         |   |         |         |          |   |         |          |         |   |         |          |          |   |          |         |          |   |          |         |          |   |         |          |         |   |          |          |          |   |          |          |         |   |          |          |          |   |          |          |         |   |          |          |          |   |          |          |          |   |          |          |          |   |          |          |          |   |          |          |          |   |         |         |          |   |         |         |          |   |         |          |          |
| O                                              | 0.95291                                                                                                                                                                                                                                                                                                                                                                                                                                                                                                                                                                                                                                                                                                                                                                                                                                                                                                                                                                                                                                                                                                                                                                                                                                                                                                                                                                                                                                                                                                                                                                                                                                                                                                                                                                                                                                                                                                                                                                                                                                 | 0.76669  | -0.51050 |          |         |   |         |         |          |   |         |         |          |   |         |         |          |   |         |          |         |   |         |          |         |   |         |          |          |   |         |          |          |   |         |          |         |   |         |         |          |   |         |          |         |   |         |          |          |   |          |         |          |   |          |         |          |   |         |          |         |   |          |          |          |   |          |          |         |   |          |          |          |   |          |          |         |   |          |          |          |   |          |          |          |   |          |          |          |   |          |          |          |   |          |          |          |   |         |         |          |   |         |         |          |   |         |          |          |
| C                                              | 1.02714                                                                                                                                                                                                                                                                                                                                                                                                                                                                                                                                                                                                                                                                                                                                                                                                                                                                                                                                                                                                                                                                                                                                                                                                                                                                                                                                                                                                                                                                                                                                                                                                                                                                                                                                                                                                                                                                                                                                                                                                                                 | 2.19122  | -0.58687 |          |         |   |         |         |          |   |         |         |          |   |         |         |          |   |         |          |         |   |         |          |         |   |         |          |          |   |         |          |          |   |         |          |         |   |         |         |          |   |         |          |         |   |         |          |          |   |          |         |          |   |          |         |          |   |         |          |         |   |          |          |          |   |          |          |         |   |          |          |          |   |          |          |         |   |          |          |          |   |          |          |          |   |          |          |          |   |          |          |          |   |          |          |          |   |         |         |          |   |         |         |          |   |         |          |          |
| C                                              | 0.60790                                                                                                                                                                                                                                                                                                                                                                                                                                                                                                                                                                                                                                                                                                                                                                                                                                                                                                                                                                                                                                                                                                                                                                                                                                                                                                                                                                                                                                                                                                                                                                                                                                                                                                                                                                                                                                                                                                                                                                                                                                 | -3.19449 | -1.61749 |          |         |   |         |         |          |   |         |         |          |   |         |         |          |   |         |          |         |   |         |          |         |   |         |          |          |   |         |          |          |   |         |          |         |   |         |         |          |   |         |          |         |   |         |          |          |   |          |         |          |   |          |         |          |   |         |          |         |   |          |          |          |   |          |          |         |   |          |          |          |   |          |          |         |   |          |          |          |   |          |          |          |   |          |          |          |   |          |          |          |   |          |          |          |   |         |         |          |   |         |         |          |   |         |          |          |

|   |          |          |          |
|---|----------|----------|----------|
| C | -5.16525 | 1.77794  | -0.34434 |
| O | -6.19731 | 2.10928  | -0.93158 |
| C | -5.25524 | 1.08307  | 1.02533  |
| N | -4.01719 | 0.90553  | 1.75289  |
| C | -3.61776 | 1.80889  | 2.69472  |
| O | -4.30931 | 2.75847  | 3.06078  |
| C | -2.22790 | 1.54665  | 3.25625  |
| N | -3.92534 | 1.97850  | -0.84099 |
| C | -3.74436 | 2.55177  | -2.15783 |
| H | -3.71126 | -0.97420 | -4.16164 |
| H | -5.95614 | -1.69818 | -3.36471 |
| H | -6.23601 | -2.44859 | -1.00817 |
| H | -4.28745 | -2.46568 | 0.52967  |
| H | -1.77229 | -0.99528 | -2.60123 |
| H | 0.25710  | -2.90180 | -2.61396 |
| H | -0.11603 | -3.91206 | -1.21860 |
| H | 1.57028  | -3.70457 | -1.73574 |
| H | 1.82769  | -4.56738 | 0.41253  |
| H | -1.48289 | -2.92430 | 0.06126  |
| H | 0.35285  | -4.03309 | 1.25761  |
| H | 1.92233  | -3.92740 | 2.07121  |
| H | 1.55074  | -1.31482 | -1.13116 |
| H | 8.29352  | -1.29969 | -0.79698 |
| H | 8.36367  | -0.82260 | 0.90041  |
| H | 8.13230  | -2.52764 | 0.47220  |
| H | -1.48868 | 1.64048  | 2.45356  |
| H | -2.14647 | 0.53015  | 3.65718  |
| H | -2.02207 | 2.27221  | 4.04559  |
| H | -3.37440 | 0.15469  | 1.48888  |
| H | -5.92700 | 1.68626  | 1.63986  |
| H | -5.72964 | 0.11024  | 0.85545  |
| H | -3.10473 | 1.58586  | -0.38278 |
| H | -2.67276 | 2.67851  | -2.32945 |
| H | -4.16004 | 1.90450  | -2.94118 |
| H | 5.28621  | 5.17167  | -1.61916 |
| H | 2.08053  | 2.43183  | -0.74110 |
| H | 0.42663  | 2.57355  | -1.42037 |
| H | 6.81012  | 4.95171  | -0.70694 |
| H | 0.66188  | 2.65720  | 0.33376  |
| H | 6.73201  | 4.46056  | -2.39900 |
| H | -4.24373 | 3.52457  | -2.22789 |
| O | 0.34530  | -1.31200 | 2.75023  |
| H | 3.23768  | -1.93823 | 0.49924  |
| H | 5.43706  | -3.25461 | 0.79693  |
| H | 3.74001  | 0.47215  | -0.20185 |
| H | 6.37408  | 1.38972  | -0.57666 |
| H | 0.82313  | -1.64263 | 1.94654  |
| H | -1.34591 | -1.33392 | 1.87457  |
| C | 1.01707  | -0.13883 | 3.17874  |
| H | 2.03694  | -0.36066 | 3.53212  |
| H | 0.45209  | 0.28749  | 4.01301  |
| H | 1.08590  | 0.61549  | 2.38283  |

Optimized Molecular Properties for **T4-product**

|                                                |                                                                                                                                                                                                                                                                                                                                                                                                                                                                                                                                                                                                                                                                                                                            |                          |          |
|------------------------------------------------|----------------------------------------------------------------------------------------------------------------------------------------------------------------------------------------------------------------------------------------------------------------------------------------------------------------------------------------------------------------------------------------------------------------------------------------------------------------------------------------------------------------------------------------------------------------------------------------------------------------------------------------------------------------------------------------------------------------------------|--------------------------|----------|
| Number of<br>(-)<br>Vibrational<br>Frequencies | 0                                                                                                                                                                                                                                                                                                                                                                                                                                                                                                                                                                                                                                                                                                                          |                          |          |
| Absolute<br>Energies<br>(Hartrees)             | <p><b>B3LYP/6-31G(d)</b></p> <p>There are 27 positive frequencies below 100 cm<sup>-1</sup>.</p> <p>Zero-point correction: 0.653726 hartree<br/>         Enthalpy correction: 0.702202 hartree<br/>         Free Energy correction: 0.559195 hartree<br/>         Quasiharmonic Free Energy correction: 0.580108 hartree</p> <p>SCF Energy: -1873.505647 hartree<br/>         SCF Energy + ZPVE: -1872.851921 hartree<br/>         Enthalpy: -1872.803445 hartree<br/>         Free Energy: -1872.946452 hartree</p> <p>Free Energy with quasiharmonic correction: -1872.925539 hartree<br/>         (correction: 13.12 kcal/mol)</p> <p><b>B3LYP-D3/6-311+G(d,p)</b></p> <p>SCF Done: E(RB3LYP) = -1874.19225730 A.U.</p> |                          |          |
| Cartesian<br>Coordinates                       | 79<br>spD3-product-T4.out                                                                                                                                                                                                                                                                                                                                                                                                                                                                                                                                                                                                                                                                                                  | Energy: -1176073.3881822 |          |
|                                                | O -2.04537                                                                                                                                                                                                                                                                                                                                                                                                                                                                                                                                                                                                                                                                                                                 | 3.48821                  | 0.09698  |
|                                                | C -4.79740                                                                                                                                                                                                                                                                                                                                                                                                                                                                                                                                                                                                                                                                                                                 | -3.07599                 | -1.57932 |
|                                                | O -3.79865                                                                                                                                                                                                                                                                                                                                                                                                                                                                                                                                                                                                                                                                                                                 | -2.47526                 | -1.95394 |
|                                                | O -5.67862                                                                                                                                                                                                                                                                                                                                                                                                                                                                                                                                                                                                                                                                                                                 | -2.61518                 | -0.70946 |
|                                                | C -5.66535                                                                                                                                                                                                                                                                                                                                                                                                                                                                                                                                                                                                                                                                                                                 | 0.59654                  | 1.09459  |
|                                                | C -4.93435                                                                                                                                                                                                                                                                                                                                                                                                                                                                                                                                                                                                                                                                                                                 | 1.75377                  | 1.23232  |
|                                                | N -5.01004                                                                                                                                                                                                                                                                                                                                                                                                                                                                                                                                                                                                                                                                                                                 | -0.22924                 | 0.20410  |
|                                                | C -3.91729                                                                                                                                                                                                                                                                                                                                                                                                                                                                                                                                                                                                                                                                                                                 | 0.43100                  | -0.17302 |
|                                                | N -3.82653                                                                                                                                                                                                                                                                                                                                                                                                                                                                                                                                                                                                                                                                                                                 | 1.63631                  | 0.42339  |
|                                                | C -5.15654                                                                                                                                                                                                                                                                                                                                                                                                                                                                                                                                                                                                                                                                                                                 | -4.46716                 | -2.07620 |
|                                                | C -6.95202                                                                                                                                                                                                                                                                                                                                                                                                                                                                                                                                                                                                                                                                                                                 | 0.19854                  | 1.74878  |
|                                                | C -0.20728                                                                                                                                                                                                                                                                                                                                                                                                                                                                                                                                                                                                                                                                                                                 | 1.52241                  | -2.29783 |
|                                                | C 0.71341                                                                                                                                                                                                                                                                                                                                                                                                                                                                                                                                                                                                                                                                                                                  | -0.58004                 | -1.42577 |
|                                                | O 1.60370                                                                                                                                                                                                                                                                                                                                                                                                                                                                                                                                                                                                                                                                                                                  | -1.24857                 | -0.92303 |
|                                                | C -2.59401                                                                                                                                                                                                                                                                                                                                                                                                                                                                                                                                                                                                                                                                                                                 | 4.75850                  | 0.23696  |
|                                                | C 0.73803                                                                                                                                                                                                                                                                                                                                                                                                                                                                                                                                                                                                                                                                                                                  | 0.90164                  | -1.56199 |
|                                                | C 1.82812                                                                                                                                                                                                                                                                                                                                                                                                                                                                                                                                                                                                                                                                                                                  | 1.63490                  | -0.78814 |
|                                                | C 3.24660                                                                                                                                                                                                                                                                                                                                                                                                                                                                                                                                                                                                                                                                                                                  | 1.33445                  | -1.26841 |
|                                                | O 1.71649                                                                                                                                                                                                                                                                                                                                                                                                                                                                                                                                                                                                                                                                                                                  | 1.39626                  | 0.60983  |
|                                                | C 4.31160                                                                                                                                                                                                                                                                                                                                                                                                                                                                                                                                                                                                                                                                                                                  | 1.30060                  | -0.36215 |
|                                                | C 3.52268                                                                                                                                                                                                                                                                                                                                                                                                                                                                                                                                                                                                                                                                                                                  | 1.18115                  | -2.63330 |
|                                                | C 5.62007                                                                                                                                                                                                                                                                                                                                                                                                                                                                                                                                                                                                                                                                                                                  | 1.10079                  | -0.80656 |
|                                                | C 4.82983                                                                                                                                                                                                                                                                                                                                                                                                                                                                                                                                                                                                                                                                                                                  | 0.98888                  | -3.08106 |
|                                                | C 5.88590                                                                                                                                                                                                                                                                                                                                                                                                                                                                                                                                                                                                                                                                                                                  | 0.94491                  | -2.16836 |
|                                                | O -0.41262                                                                                                                                                                                                                                                                                                                                                                                                                                                                                                                                                                                                                                                                                                                 | -1.14158                 | -1.91751 |
|                                                | C -0.50647                                                                                                                                                                                                                                                                                                                                                                                                                                                                                                                                                                                                                                                                                                                 | -2.57233                 | -1.82843 |
|                                                | C -0.40700                                                                                                                                                                                                                                                                                                                                                                                                                                                                                                                                                                                                                                                                                                                 | 2.99055                  | -2.50168 |



|   |          |          |          |
|---|----------|----------|----------|
| C | 4.44074  | -1.86240 | 1.89820  |
| O | 5.60014  | -2.08990 | 2.24676  |
| C | 3.46581  | -1.20211 | 2.88570  |
| N | 2.13788  | -0.90056 | 2.39636  |
| C | 1.04211  | -1.58267 | 2.84612  |
| O | 1.10307  | -2.48817 | 3.67609  |
| C | -0.28379 | -1.14037 | 2.24433  |
| N | 3.94413  | -2.17927 | 0.68095  |
| C | 4.79241  | -2.74121 | -0.35090 |
| H | 5.02209  | 0.86779  | -4.14492 |
| H | 6.90497  | 0.78918  | -2.51466 |
| H | 6.43124  | 1.06098  | -0.08374 |
| H | 4.10209  | 1.42973  | 0.69361  |
| H | 2.70487  | 1.20481  | -3.34904 |
| H | -0.86617 | 3.18564  | -3.47770 |
| H | 0.51531  | 3.57479  | -2.43102 |
| H | -1.09857 | 3.33854  | -1.70783 |
| H | -2.41386 | 5.40199  | -0.64857 |
| H | 1.66738  | 2.70813  | -0.95420 |
| H | -2.18506 | 5.31090  | 1.10706  |
| H | -3.69486 | 4.73275  | 0.37436  |
| H | -0.96204 | 0.88640  | -2.75449 |
| H | -7.73548 | -0.00753 | 1.00783  |
| H | -6.83457 | -0.71124 | 2.35181  |
| H | -7.31439 | 0.99420  | 2.40883  |
| H | -0.19615 | -0.26754 | 1.59344  |
| H | -0.98341 | -0.92003 | 3.05650  |
| H | -0.70912 | -1.97132 | 1.67130  |
| H | 2.01202  | -0.14075 | 1.72421  |
| H | 3.35201  | -1.88222 | 3.73422  |
| H | 3.96012  | -0.29401 | 3.25239  |
| H | 3.02879  | -1.83925 | 0.40656  |
| H | 4.15855  | -3.18281 | -1.12421 |
| H | 5.43335  | -1.97914 | -0.81374 |
| H | -4.45122 | -4.78377 | -2.84660 |
| H | -1.52961 | -2.80953 | -2.11742 |
| H | 0.22182  | -3.04099 | -2.49907 |
| H | -5.13155 | -5.17611 | -1.24090 |
| H | -0.30483 | -2.90360 | -0.80651 |
| H | -6.17616 | -4.47370 | -2.47593 |
| H | 5.43483  | -3.51129 | 0.08474  |
| O | -0.02531 | 3.14775  | 1.55997  |
| H | -3.05292 | 2.40576  | 0.27459  |
| H | -5.10839 | 2.63613  | 1.83127  |
| H | -3.18367 | 0.04104  | -0.86525 |
| H | -5.39376 | -1.67009 | -0.36278 |
| H | -0.84768 | 3.31110  | 0.92848  |
| H | 1.03910  | 2.04514  | 0.97563  |
| C | -0.52691 | 2.81707  | 2.83708  |
| H | -0.84496 | 3.71430  | 3.39409  |
| H | 0.26326  | 2.32553  | 3.41887  |
| H | -1.38747 | 2.13261  | 2.78393  |

Optimized Molecular Properties for **T5-INT2-1**

|                                                |                                                                                                                                                                                                                                                                                                                                                                                                                                                                                                                                                                                                                                                                                                                            |                                                    |                   |
|------------------------------------------------|----------------------------------------------------------------------------------------------------------------------------------------------------------------------------------------------------------------------------------------------------------------------------------------------------------------------------------------------------------------------------------------------------------------------------------------------------------------------------------------------------------------------------------------------------------------------------------------------------------------------------------------------------------------------------------------------------------------------------|----------------------------------------------------|-------------------|
| Number of<br>(-)<br>Vibrational<br>Frequencies | 0                                                                                                                                                                                                                                                                                                                                                                                                                                                                                                                                                                                                                                                                                                                          |                                                    |                   |
| Absolute<br>Energies<br>(Hartrees)             | <p><b>B3LYP/6-31G(d)</b></p> <p>There are 28 positive frequencies below 100 cm<sup>-1</sup>.</p> <p>Zero-point correction: 0.711085 hartree<br/>         Enthalpy correction: 0.762060 hartree<br/>         Free Energy correction: 0.612110 hartree<br/>         Quasiharmonic Free Energy correction: 0.635977 hartree</p> <p>SCF Energy: -2065.259284 hartree<br/>         SCF Energy + ZPVE: -2064.548199 hartree<br/>         Enthalpy: -2064.497224 hartree<br/>         Free Energy: -2064.647174 hartree</p> <p>Free Energy with quasiharmonic correction: -2064.623307 hartree<br/>         (correction: 14.98 kcal/mol)</p> <p><b>B3LYP-D3/6-311+G(d,p)</b></p> <p>SCF Done: E(RB3LYP) = -2065.99292771 A.U.</p> |                                                    |                   |
| Cartesian<br>Coordinates                       | 86                                                                                                                                                                                                                                                                                                                                                                                                                                                                                                                                                                                                                                                                                                                         | <p>spD3-INT2-1-T5.out Energy: -1296430.1250251</p> |                   |
|                                                | O                                                                                                                                                                                                                                                                                                                                                                                                                                                                                                                                                                                                                                                                                                                          | -1.33772                                           | -2.19129 -1.27726 |
|                                                | C                                                                                                                                                                                                                                                                                                                                                                                                                                                                                                                                                                                                                                                                                                                          | -6.88099                                           | 1.68412 0.63053   |
|                                                | O                                                                                                                                                                                                                                                                                                                                                                                                                                                                                                                                                                                                                                                                                                                          | -5.67026                                           | 1.70408 0.47020   |
|                                                | O                                                                                                                                                                                                                                                                                                                                                                                                                                                                                                                                                                                                                                                                                                                          | -7.66047                                           | 0.63145 0.40337   |
|                                                | C                                                                                                                                                                                                                                                                                                                                                                                                                                                                                                                                                                                                                                                                                                                          | -6.27588                                           | -2.74044 -0.86280 |
|                                                | C                                                                                                                                                                                                                                                                                                                                                                                                                                                                                                                                                                                                                                                                                                                          | -5.04015                                           | -3.25666 -1.17199 |
|                                                | N                                                                                                                                                                                                                                                                                                                                                                                                                                                                                                                                                                                                                                                                                                                          | -6.12187                                           | -1.42928 -0.45209 |
|                                                | C                                                                                                                                                                                                                                                                                                                                                                                                                                                                                                                                                                                                                                                                                                                          | -4.82480                                           | -1.17007 -0.51566 |
|                                                | N                                                                                                                                                                                                                                                                                                                                                                                                                                                                                                                                                                                                                                                                                                                          | -4.12974                                           | -2.24520 -0.94614 |
|                                                | C                                                                                                                                                                                                                                                                                                                                                                                                                                                                                                                                                                                                                                                                                                                          | -7.67316                                           | 2.88105 1.12033   |
|                                                | C                                                                                                                                                                                                                                                                                                                                                                                                                                                                                                                                                                                                                                                                                                                          | -7.61854                                           | -3.39855 -0.92492 |
|                                                | C                                                                                                                                                                                                                                                                                                                                                                                                                                                                                                                                                                                                                                                                                                                          | -0.49001                                           | -2.00645 -0.10477 |
|                                                | C                                                                                                                                                                                                                                                                                                                                                                                                                                                                                                                                                                                                                                                                                                                          | -0.29153                                           | 0.46441 -0.68823  |
|                                                | O                                                                                                                                                                                                                                                                                                                                                                                                                                                                                                                                                                                                                                                                                                                          | 0.16206                                            | 1.31648 -1.43488  |
|                                                | C                                                                                                                                                                                                                                                                                                                                                                                                                                                                                                                                                                                                                                                                                                                          | -0.69566                                           | -2.47767 -2.51287 |
|                                                | C                                                                                                                                                                                                                                                                                                                                                                                                                                                                                                                                                                                                                                                                                                                          | 0.43793                                            | -0.79671 -0.28925 |
|                                                | C                                                                                                                                                                                                                                                                                                                                                                                                                                                                                                                                                                                                                                                                                                                          | 1.45230                                            | -0.49507 0.94280  |
|                                                | C                                                                                                                                                                                                                                                                                                                                                                                                                                                                                                                                                                                                                                                                                                                          | 0.80269                                            | 0.38299 2.01771   |
|                                                | O                                                                                                                                                                                                                                                                                                                                                                                                                                                                                                                                                                                                                                                                                                                          | 2.63209                                            | 0.00707 0.47321   |
|                                                | C                                                                                                                                                                                                                                                                                                                                                                                                                                                                                                                                                                                                                                                                                                                          | 1.11861                                            | 1.74390 2.09987   |
|                                                | C                                                                                                                                                                                                                                                                                                                                                                                                                                                                                                                                                                                                                                                                                                                          | -0.09505                                           | -0.14897 2.95254  |
|                                                | C                                                                                                                                                                                                                                                                                                                                                                                                                                                                                                                                                                                                                                                                                                                          | 0.53274                                            | 2.55641 3.07280   |
|                                                | C                                                                                                                                                                                                                                                                                                                                                                                                                                                                                                                                                                                                                                                                                                                          | -0.68225                                           | 0.65752 3.92858   |
|                                                | C                                                                                                                                                                                                                                                                                                                                                                                                                                                                                                                                                                                                                                                                                                                          | -0.37315                                           | 2.01788 3.98952   |
|                                                | H                                                                                                                                                                                                                                                                                                                                                                                                                                                                                                                                                                                                                                                                                                                          | 1.13731                                            | -1.02116 -1.09642 |
|                                                | O                                                                                                                                                                                                                                                                                                                                                                                                                                                                                                                                                                                                                                                                                                                          | -1.49529                                           | 0.59927 -0.08836  |
|                                                | C                                                                                                                                                                                                                                                                                                                                                                                                                                                                                                                                                                                                                                                                                                                          | -2.15962                                           | 1.85879 -0.29555  |

|   |          |          |          |
|---|----------|----------|----------|
| C | 0.25115  | -3.30895 | 0.22120  |
| C | 3.13710  | 4.17141  | -0.67282 |
| O | 3.52207  | 5.25509  | -0.23344 |
| C | 4.14471  | 3.04419  | -0.94217 |
| N | 3.60577  | 1.81510  | -1.47768 |
| C | 3.78741  | 1.48153  | -2.78946 |
| O | 4.38297  | 2.19744  | -3.59511 |
| C | 3.17179  | 0.14781  | -3.18978 |
| N | 1.83871  | 3.87857  | -0.94309 |
| C | 0.77222  | 4.82645  | -0.70895 |
| H | -1.37526 | 0.22225  | 4.64551  |
| H | -0.82580 | 2.64907  | 4.75095  |
| H | 0.79599  | 3.61081  | 3.12170  |
| H | 1.84337  | 2.14757  | 1.40226  |
| H | -0.33036 | -1.21191 | 2.92666  |
| H | 0.53733  | -3.33825 | 1.27609  |
| H | 1.17109  | -3.41957 | -0.36209 |
| H | -0.40996 | -4.16205 | 0.03010  |
| H | -0.05643 | -3.36723 | -2.44821 |
| H | 1.59998  | -1.48830 | 1.40888  |
| H | -0.09538 | -1.63292 | -2.87023 |
| H | -1.49501 | -2.66820 | -3.23506 |
| H | -1.22528 | -1.79460 | 0.67575  |
| H | -3.10977 | -2.27803 | -1.07699 |
| H | -4.73834 | -4.23215 | -1.52348 |
| H | -8.10105 | -3.41618 | 0.06023  |
| H | -8.29393 | -2.86478 | -1.60509 |
| H | -7.53110 | -4.43169 | -1.27699 |
| H | -4.37510 | -0.22456 | -0.25416 |
| H | -7.09952 | -0.15843 | 0.07751  |
| H | 2.08024  | 0.21363  | -3.10912 |
| H | 3.50896  | -0.66234 | -2.53350 |
| H | 3.44883  | -0.06829 | -4.22368 |
| H | 3.15540  | 1.15051  | -0.82701 |
| H | 4.87943  | 3.43419  | -1.65152 |
| H | 4.65970  | 2.85113  | 0.00637  |
| H | 1.60245  | 2.94387  | -1.25965 |
| H | 0.16178  | 4.54296  | 0.15964  |
| H | 1.22869  | 5.79908  | -0.51432 |
| H | -8.43980 | 3.14875  | 0.38523  |
| H | -3.13071 | 1.77608  | 0.19245  |
| H | -1.57428 | 2.66480  | 0.15471  |
| H | -8.19125 | 2.62927  | 2.05208  |
| H | -2.28053 | 2.05691  | -1.36380 |
| H | -7.00416 | 3.72674  | 1.28527  |
| H | 0.11689  | 4.89634  | -1.58488 |
| O | 3.70136  | -2.03334 | -0.45188 |
| C | 4.64652  | -2.55263 | 0.34284  |
| C | 6.63642  | -3.72169 | 1.97618  |
| C | 5.28026  | -3.75299 | -0.03666 |
| C | 5.03173  | -1.94397 | 1.55694  |
| C | 6.01271  | -2.52877 | 2.35479  |
| C | 6.25968  | -4.32465 | 0.77226  |
| H | 4.98475  | -4.21601 | -0.97470 |
| H | 6.73564  | -5.25230 | 0.45782  |
| H | 7.40190  | -4.17066 | 2.60450  |

|  |   |         |          |          |
|--|---|---------|----------|----------|
|  | H | 6.29464 | -2.04267 | 3.28734  |
|  | H | 4.54512 | -1.01532 | 1.84224  |
|  | H | 3.29786 | -1.11600 | -0.04439 |

Optimized Molecular Properties for **T5-INT2-2**

|                                                |                                                                                                                                                                                                                                                                                                                                                                                                                                                                                                                                                                                                                                                                                                                            |                          |          |
|------------------------------------------------|----------------------------------------------------------------------------------------------------------------------------------------------------------------------------------------------------------------------------------------------------------------------------------------------------------------------------------------------------------------------------------------------------------------------------------------------------------------------------------------------------------------------------------------------------------------------------------------------------------------------------------------------------------------------------------------------------------------------------|--------------------------|----------|
| Number of<br>(-)<br>Vibrational<br>Frequencies | 0                                                                                                                                                                                                                                                                                                                                                                                                                                                                                                                                                                                                                                                                                                                          |                          |          |
| Absolute<br>Energies<br>(Hartrees)             | <p><b>B3LYP/6-31G(d)</b></p> <p>There are 26 positive frequencies below 100 cm<sup>-1</sup>.</p> <p>Zero-point correction: 0.713714 hartree<br/>         Enthalpy correction: 0.764172 hartree<br/>         Free Energy correction: 0.617705 hartree<br/>         Quasiharmonic Free Energy correction: 0.639328 hartree</p> <p>SCF Energy: -2065.261399 hartree<br/>         SCF Energy + ZPVE: -2064.547685 hartree<br/>         Enthalpy: -2064.497227 hartree<br/>         Free Energy: -2064.643694 hartree</p> <p>Free Energy with quasiharmonic correction: -2064.622070 hartree<br/>         (correction: 13.57 kcal/mol)</p> <p><b>B3LYP-D3/6-311+G(d,p)</b></p> <p>SCF Done: E(RB3LYP) = -2065.99606043 A.U.</p> |                          |          |
| Cartesian<br>Coordinates                       | 86<br>spD3-INT2-2-T5.out                                                                                                                                                                                                                                                                                                                                                                                                                                                                                                                                                                                                                                                                                                   | Energy: -1296432.0908365 |          |
|                                                | O 1.05287                                                                                                                                                                                                                                                                                                                                                                                                                                                                                                                                                                                                                                                                                                                  | 2.25301                  | -0.66010 |
|                                                | C 6.83535                                                                                                                                                                                                                                                                                                                                                                                                                                                                                                                                                                                                                                                                                                                  | -1.61580                 | 0.03006  |
|                                                | O 5.61504                                                                                                                                                                                                                                                                                                                                                                                                                                                                                                                                                                                                                                                                                                                  | -1.66067                 | -0.01550 |
|                                                | O 7.55959                                                                                                                                                                                                                                                                                                                                                                                                                                                                                                                                                                                                                                                                                                                  | -0.51129                 | -0.10924 |
|                                                | C 5.99958                                                                                                                                                                                                                                                                                                                                                                                                                                                                                                                                                                                                                                                                                                                  | 2.94714                  | -0.73006 |
|                                                | C 4.73426                                                                                                                                                                                                                                                                                                                                                                                                                                                                                                                                                                                                                                                                                                                  | 3.46936                  | -0.85465 |
|                                                | N 5.90053                                                                                                                                                                                                                                                                                                                                                                                                                                                                                                                                                                                                                                                                                                                  | 1.58624                  | -0.50723 |
|                                                | C 4.60649                                                                                                                                                                                                                                                                                                                                                                                                                                                                                                                                                                                                                                                                                                                  | 1.30415                  | -0.50044 |
|                                                | N 3.86140                                                                                                                                                                                                                                                                                                                                                                                                                                                                                                                                                                                                                                                                                                                  | 2.41181                  | -0.70720 |
|                                                | C 7.70217                                                                                                                                                                                                                                                                                                                                                                                                                                                                                                                                                                                                                                                                                                                  | -2.83951                 | 0.25656  |
|                                                | C 7.32218                                                                                                                                                                                                                                                                                                                                                                                                                                                                                                                                                                                                                                                                                                                  | 3.64336                  | -0.80562 |
|                                                | C 0.56924                                                                                                                                                                                                                                                                                                                                                                                                                                                                                                                                                                                                                                                                                                                  | 1.68405                  | 0.58758  |
|                                                | C 0.26141                                                                                                                                                                                                                                                                                                                                                                                                                                                                                                                                                                                                                                                                                                                  | -0.62114                 | -0.47569 |
|                                                | O -0.30292                                                                                                                                                                                                                                                                                                                                                                                                                                                                                                                                                                                                                                                                                                                 | -1.35613                 | -1.26655 |
|                                                | C 0.17068                                                                                                                                                                                                                                                                                                                                                                                                                                                                                                                                                                                                                                                                                                                  | 3.15576                  | -1.33789 |
|                                                | C -0.41027                                                                                                                                                                                                                                                                                                                                                                                                                                                                                                                                                                                                                                                                                                                 | 0.54414                  | 0.22861  |
|                                                | C -1.38321                                                                                                                                                                                                                                                                                                                                                                                                                                                                                                                                                                                                                                                                                                                 | 0.03512                  | 1.38028  |
|                                                | C -0.88494                                                                                                                                                                                                                                                                                                                                                                                                                                                                                                                                                                                                                                                                                                                 | -1.18771                 | 2.13864  |
|                                                | O -2.66448                                                                                                                                                                                                                                                                                                                                                                                                                                                                                                                                                                                                                                                                                                                 | -0.19758                 | 0.85228  |
|                                                | C -1.61537                                                                                                                                                                                                                                                                                                                                                                                                                                                                                                                                                                                                                                                                                                                 | -2.38026                 | 2.13453  |
|                                                | C 0.30239                                                                                                                                                                                                                                                                                                                                                                                                                                                                                                                                                                                                                                                                                                                  | -1.13329                 | 2.88308  |
|                                                | C -1.16382                                                                                                                                                                                                                                                                                                                                                                                                                                                                                                                                                                                                                                                                                                                 | -3.49711                 | 2.84235  |
|                                                | C 0.75446                                                                                                                                                                                                                                                                                                                                                                                                                                                                                                                                                                                                                                                                                                                  | -2.24450                 | 3.59393  |
|                                                | C 0.02286                                                                                                                                                                                                                                                                                                                                                                                                                                                                                                                                                                                                                                                                                                                  | -3.43463                 | 3.57368  |
|                                                | H -1.11207                                                                                                                                                                                                                                                                                                                                                                                                                                                                                                                                                                                                                                                                                                                 | 0.96215                  | -0.49314 |
|                                                | O 1.54889                                                                                                                                                                                                                                                                                                                                                                                                                                                                                                                                                                                                                                                                                                                  | -0.81159                 | -0.11405 |
|                                                | C 2.18662                                                                                                                                                                                                                                                                                                                                                                                                                                                                                                                                                                                                                                                                                                                  | -1.97917                 | -0.66845 |

|   |          |          |          |
|---|----------|----------|----------|
| C | 0.00766  | 2.76778  | 1.51044  |
| C | -3.36162 | -4.11709 | -0.96066 |
| O | -3.80223 | -5.20577 | -0.59066 |
| C | -4.32115 | -2.94207 | -1.20128 |
| N | -3.71380 | -1.67040 | -1.52225 |
| C | -3.82165 | -1.12225 | -2.77402 |
| O | -4.42005 | -1.67737 | -3.69405 |
| C | -3.11051 | 0.20980  | -2.94451 |
| N | -2.04931 | -3.86537 | -1.19518 |
| C | -1.02287 | -4.85926 | -0.96801 |
| H | 1.67878  | -2.18022 | 4.16327  |
| H | 0.37460  | -4.30277 | 4.12614  |
| H | -1.74717 | -4.41429 | 2.82015  |
| H | -2.54445 | -2.41936 | 1.58012  |
| H | 0.88218  | -0.21338 | 2.91095  |
| H | -0.06242 | 2.40263  | 2.54003  |
| H | -0.98903 | 3.09029  | 1.19616  |
| H | 0.68845  | 3.62684  | 1.51553  |
| H | 0.25933  | 4.17300  | -0.93310 |
| H | -1.44511 | 0.86169  | 2.09984  |
| H | -0.87721 | 2.84516  | -1.26442 |
| H | 0.48050  | 3.16052  | -2.38696 |
| H | 1.47764  | 1.26940  | 1.03147  |
| H | 2.83150  | 2.43627  | -0.73690 |
| H | 4.38941  | 4.47717  | -1.03228 |
| H | 7.88896  | 3.52674  | 0.12650  |
| H | 7.94271  | 3.23601  | -1.61349 |
| H | 7.18934  | 4.71465  | -0.98873 |
| H | 4.19281  | 0.31953  | -0.34438 |
| H | 6.94776  | 0.29558  | -0.26171 |
| H | -2.02947 | 0.03169  | -3.00099 |
| H | -3.28867 | 0.89404  | -2.10584 |
| H | -3.44509 | 0.66506  | -3.87905 |
| H | -3.26132 | -1.14220 | -0.77318 |
| H | -4.96912 | -3.21577 | -2.03878 |
| H | -4.94908 | -2.86173 | -0.30587 |
| H | -1.76497 | -2.91604 | -1.41113 |
| H | -0.44745 | -4.64318 | -0.05765 |
| H | -1.51521 | -5.82676 | -0.85137 |
| H | 8.38648  | -2.97416 | -0.58811 |
| H | 3.21415  | -1.96328 | -0.30589 |
| H | 1.66912  | -2.88057 | -0.33004 |
| H | 8.31677  | -2.70115 | 1.15262  |
| H | 2.15977  | -1.94223 | -1.76060 |
| H | 7.07403  | -3.72416 | 0.37011  |
| H | -0.33197 | -4.90001 | -1.81804 |
| O | -3.04760 | 2.14097  | -0.09643 |
| H | -2.97333 | 0.73072  | 0.51232  |
| C | -3.93987 | 2.99730  | 0.34179  |
| C | -5.85645 | 4.89602  | 1.29885  |
| C | -4.08825 | 4.28250  | -0.25257 |
| C | -4.80331 | 2.70822  | 1.43701  |
| C | -5.73250 | 3.63688  | 1.89690  |
| C | -5.02134 | 5.20148  | 0.21798  |
| H | -3.44801 | 4.52599  | -1.09841 |
| H | -5.10162 | 6.17406  | -0.26802 |

|  |   |          |         |         |
|--|---|----------|---------|---------|
|  | H | -6.58487 | 5.61716 | 1.66232 |
|  | H | -6.37363 | 3.37325 | 2.73806 |
|  | H | -4.71702 | 1.73152 | 1.90937 |

Optimized Molecular Properties for **T5-TS3**

|                                                |                                                                                                                                                                                                                                                                                                                                                                                                                                                                                                                                                                                                                                                                                                                                                                                                                                                                                                                                                                                                                                                                                                                                                                                                                                                                                                                                                                                                                                                                                                                                                                                                                                                                                                                                                                                                                                                                                                                                                                                                                                               |          |          |         |          |   |          |          |         |   |          |          |         |   |          |          |         |   |          |          |          |   |          |          |          |   |          |          |          |   |          |          |          |   |          |          |          |   |          |          |         |   |          |          |          |   |          |          |          |   |         |          |         |   |         |          |         |   |          |         |          |   |         |         |          |   |         |         |          |   |         |          |          |   |         |         |          |   |         |          |          |   |         |          |          |   |         |          |          |   |         |          |          |   |         |          |          |   |         |         |          |   |          |          |         |   |          |          |         |
|------------------------------------------------|-----------------------------------------------------------------------------------------------------------------------------------------------------------------------------------------------------------------------------------------------------------------------------------------------------------------------------------------------------------------------------------------------------------------------------------------------------------------------------------------------------------------------------------------------------------------------------------------------------------------------------------------------------------------------------------------------------------------------------------------------------------------------------------------------------------------------------------------------------------------------------------------------------------------------------------------------------------------------------------------------------------------------------------------------------------------------------------------------------------------------------------------------------------------------------------------------------------------------------------------------------------------------------------------------------------------------------------------------------------------------------------------------------------------------------------------------------------------------------------------------------------------------------------------------------------------------------------------------------------------------------------------------------------------------------------------------------------------------------------------------------------------------------------------------------------------------------------------------------------------------------------------------------------------------------------------------------------------------------------------------------------------------------------------------|----------|----------|---------|----------|---|----------|----------|---------|---|----------|----------|---------|---|----------|----------|---------|---|----------|----------|----------|---|----------|----------|----------|---|----------|----------|----------|---|----------|----------|----------|---|----------|----------|----------|---|----------|----------|---------|---|----------|----------|----------|---|----------|----------|----------|---|---------|----------|---------|---|---------|----------|---------|---|----------|---------|----------|---|---------|---------|----------|---|---------|---------|----------|---|---------|----------|----------|---|---------|---------|----------|---|---------|----------|----------|---|---------|----------|----------|---|---------|----------|----------|---|---------|----------|----------|---|---------|----------|----------|---|---------|---------|----------|---|----------|----------|---------|---|----------|----------|---------|
| Number of<br>(-)<br>Vibrational<br>Frequencies | 1 (-985.5740)                                                                                                                                                                                                                                                                                                                                                                                                                                                                                                                                                                                                                                                                                                                                                                                                                                                                                                                                                                                                                                                                                                                                                                                                                                                                                                                                                                                                                                                                                                                                                                                                                                                                                                                                                                                                                                                                                                                                                                                                                                 |          |          |         |          |   |          |          |         |   |          |          |         |   |          |          |         |   |          |          |          |   |          |          |          |   |          |          |          |   |          |          |          |   |          |          |          |   |          |          |         |   |          |          |          |   |          |          |          |   |         |          |         |   |         |          |         |   |          |         |          |   |         |         |          |   |         |         |          |   |         |          |          |   |         |         |          |   |         |          |          |   |         |          |          |   |         |          |          |   |         |          |          |   |         |          |          |   |         |         |          |   |          |          |         |   |          |          |         |
| Absolute<br>Energies<br>(Hartrees)             | <p><b>B3LYP/6-31G(d)</b></p> <p>There are 26 positive frequencies below 100 cm<sup>-1</sup>.</p> <p>Zero-point correction: 0.708375 hartree<br/>         Enthalpy correction: 0.758847 hartree<br/>         Free Energy correction: 0.611881 hartree<br/>         Quasiharmonic Free Energy correction: 0.634095 hartree</p> <p>SCF Energy: -2065.228833 hartree<br/>         SCF Energy + ZPVE: -2064.520458 hartree<br/>         Enthalpy: -2064.469986 hartree<br/>         Free Energy: -2064.616952 hartree</p> <p>Free Energy with quasiharmonic correction: -2064.594738 hartree<br/>         (correction: 13.94 kcal/mol)</p> <p><b>B3LYP-D3/6-311+G(d,p)</b></p> <p>SCF Done: E(RB3LYP) = -2065.96953581 A.U.</p>                                                                                                                                                                                                                                                                                                                                                                                                                                                                                                                                                                                                                                                                                                                                                                                                                                                                                                                                                                                                                                                                                                                                                                                                                                                                                                                    |          |          |         |          |   |          |          |         |   |          |          |         |   |          |          |         |   |          |          |          |   |          |          |          |   |          |          |          |   |          |          |          |   |          |          |          |   |          |          |         |   |          |          |          |   |          |          |          |   |         |          |         |   |         |          |         |   |          |         |          |   |         |         |          |   |         |         |          |   |         |          |          |   |         |         |          |   |         |          |          |   |         |          |          |   |         |          |          |   |         |          |          |   |         |          |          |   |         |         |          |   |          |          |         |   |          |          |         |
| Cartesian<br>Coordinates                       | <p>86</p> <p>spD3-TS3-T5.out Energy: -1296415.4463863</p> <table> <tr><td>O</td><td>-1.76268</td><td>0.89135</td><td>-2.22923</td></tr> <tr><td>C</td><td>-5.48429</td><td>-2.11244</td><td>2.99710</td></tr> <tr><td>O</td><td>-4.36938</td><td>-1.70268</td><td>2.71404</td></tr> <tr><td>O</td><td>-6.53651</td><td>-2.07796</td><td>2.18571</td></tr> <tr><td>C</td><td>-6.39504</td><td>-0.65502</td><td>-1.37326</td></tr> <tr><td>C</td><td>-5.45333</td><td>-0.08065</td><td>-2.19347</td></tr> <tr><td>N</td><td>-5.80285</td><td>-0.96324</td><td>-0.16297</td></tr> <tr><td>C</td><td>-4.53786</td><td>-0.58022</td><td>-0.26057</td></tr> <tr><td>N</td><td>-4.27994</td><td>-0.04014</td><td>-1.47077</td></tr> <tr><td>C</td><td>-5.82503</td><td>-2.72795</td><td>4.34149</td></tr> <tr><td>C</td><td>-7.83874</td><td>-0.94143</td><td>-1.64473</td></tr> <tr><td>C</td><td>-0.70039</td><td>-0.13293</td><td>-2.23861</td></tr> <tr><td>C</td><td>0.43835</td><td>-0.17896</td><td>0.02022</td></tr> <tr><td>O</td><td>1.38145</td><td>-0.26685</td><td>0.81015</td></tr> <tr><td>C</td><td>-1.59395</td><td>2.02942</td><td>-3.06416</td></tr> <tr><td>C</td><td>0.50668</td><td>0.24253</td><td>-1.37071</td></tr> <tr><td>C</td><td>1.90992</td><td>0.15162</td><td>-1.99385</td></tr> <tr><td>C</td><td>2.60376</td><td>-1.21448</td><td>-2.01914</td></tr> <tr><td>O</td><td>2.85958</td><td>1.06981</td><td>-1.41234</td></tr> <tr><td>C</td><td>3.95128</td><td>-1.28461</td><td>-2.40757</td></tr> <tr><td>C</td><td>1.93714</td><td>-2.41201</td><td>-1.74047</td></tr> <tr><td>C</td><td>4.60973</td><td>-2.50975</td><td>-2.50728</td></tr> <tr><td>C</td><td>2.59104</td><td>-3.64289</td><td>-1.84531</td></tr> <tr><td>C</td><td>3.93092</td><td>-3.69796</td><td>-2.22657</td></tr> <tr><td>H</td><td>0.47985</td><td>1.72340</td><td>-1.17633</td></tr> <tr><td>O</td><td>-0.84545</td><td>-0.41691</td><td>0.46895</td></tr> <tr><td>C</td><td>-0.95100</td><td>-0.72637</td><td>1.86510</td></tr> </table> | O        | -1.76268 | 0.89135 | -2.22923 | C | -5.48429 | -2.11244 | 2.99710 | O | -4.36938 | -1.70268 | 2.71404 | O | -6.53651 | -2.07796 | 2.18571 | C | -6.39504 | -0.65502 | -1.37326 | C | -5.45333 | -0.08065 | -2.19347 | N | -5.80285 | -0.96324 | -0.16297 | C | -4.53786 | -0.58022 | -0.26057 | N | -4.27994 | -0.04014 | -1.47077 | C | -5.82503 | -2.72795 | 4.34149 | C | -7.83874 | -0.94143 | -1.64473 | C | -0.70039 | -0.13293 | -2.23861 | C | 0.43835 | -0.17896 | 0.02022 | O | 1.38145 | -0.26685 | 0.81015 | C | -1.59395 | 2.02942 | -3.06416 | C | 0.50668 | 0.24253 | -1.37071 | C | 1.90992 | 0.15162 | -1.99385 | C | 2.60376 | -1.21448 | -2.01914 | O | 2.85958 | 1.06981 | -1.41234 | C | 3.95128 | -1.28461 | -2.40757 | C | 1.93714 | -2.41201 | -1.74047 | C | 4.60973 | -2.50975 | -2.50728 | C | 2.59104 | -3.64289 | -1.84531 | C | 3.93092 | -3.69796 | -2.22657 | H | 0.47985 | 1.72340 | -1.17633 | O | -0.84545 | -0.41691 | 0.46895 | C | -0.95100 | -0.72637 | 1.86510 |
| O                                              | -1.76268                                                                                                                                                                                                                                                                                                                                                                                                                                                                                                                                                                                                                                                                                                                                                                                                                                                                                                                                                                                                                                                                                                                                                                                                                                                                                                                                                                                                                                                                                                                                                                                                                                                                                                                                                                                                                                                                                                                                                                                                                                      | 0.89135  | -2.22923 |         |          |   |          |          |         |   |          |          |         |   |          |          |         |   |          |          |          |   |          |          |          |   |          |          |          |   |          |          |          |   |          |          |          |   |          |          |         |   |          |          |          |   |          |          |          |   |         |          |         |   |         |          |         |   |          |         |          |   |         |         |          |   |         |         |          |   |         |          |          |   |         |         |          |   |         |          |          |   |         |          |          |   |         |          |          |   |         |          |          |   |         |          |          |   |         |         |          |   |          |          |         |   |          |          |         |
| C                                              | -5.48429                                                                                                                                                                                                                                                                                                                                                                                                                                                                                                                                                                                                                                                                                                                                                                                                                                                                                                                                                                                                                                                                                                                                                                                                                                                                                                                                                                                                                                                                                                                                                                                                                                                                                                                                                                                                                                                                                                                                                                                                                                      | -2.11244 | 2.99710  |         |          |   |          |          |         |   |          |          |         |   |          |          |         |   |          |          |          |   |          |          |          |   |          |          |          |   |          |          |          |   |          |          |          |   |          |          |         |   |          |          |          |   |          |          |          |   |         |          |         |   |         |          |         |   |          |         |          |   |         |         |          |   |         |         |          |   |         |          |          |   |         |         |          |   |         |          |          |   |         |          |          |   |         |          |          |   |         |          |          |   |         |          |          |   |         |         |          |   |          |          |         |   |          |          |         |
| O                                              | -4.36938                                                                                                                                                                                                                                                                                                                                                                                                                                                                                                                                                                                                                                                                                                                                                                                                                                                                                                                                                                                                                                                                                                                                                                                                                                                                                                                                                                                                                                                                                                                                                                                                                                                                                                                                                                                                                                                                                                                                                                                                                                      | -1.70268 | 2.71404  |         |          |   |          |          |         |   |          |          |         |   |          |          |         |   |          |          |          |   |          |          |          |   |          |          |          |   |          |          |          |   |          |          |          |   |          |          |         |   |          |          |          |   |          |          |          |   |         |          |         |   |         |          |         |   |          |         |          |   |         |         |          |   |         |         |          |   |         |          |          |   |         |         |          |   |         |          |          |   |         |          |          |   |         |          |          |   |         |          |          |   |         |          |          |   |         |         |          |   |          |          |         |   |          |          |         |
| O                                              | -6.53651                                                                                                                                                                                                                                                                                                                                                                                                                                                                                                                                                                                                                                                                                                                                                                                                                                                                                                                                                                                                                                                                                                                                                                                                                                                                                                                                                                                                                                                                                                                                                                                                                                                                                                                                                                                                                                                                                                                                                                                                                                      | -2.07796 | 2.18571  |         |          |   |          |          |         |   |          |          |         |   |          |          |         |   |          |          |          |   |          |          |          |   |          |          |          |   |          |          |          |   |          |          |          |   |          |          |         |   |          |          |          |   |          |          |          |   |         |          |         |   |         |          |         |   |          |         |          |   |         |         |          |   |         |         |          |   |         |          |          |   |         |         |          |   |         |          |          |   |         |          |          |   |         |          |          |   |         |          |          |   |         |          |          |   |         |         |          |   |          |          |         |   |          |          |         |
| C                                              | -6.39504                                                                                                                                                                                                                                                                                                                                                                                                                                                                                                                                                                                                                                                                                                                                                                                                                                                                                                                                                                                                                                                                                                                                                                                                                                                                                                                                                                                                                                                                                                                                                                                                                                                                                                                                                                                                                                                                                                                                                                                                                                      | -0.65502 | -1.37326 |         |          |   |          |          |         |   |          |          |         |   |          |          |         |   |          |          |          |   |          |          |          |   |          |          |          |   |          |          |          |   |          |          |          |   |          |          |         |   |          |          |          |   |          |          |          |   |         |          |         |   |         |          |         |   |          |         |          |   |         |         |          |   |         |         |          |   |         |          |          |   |         |         |          |   |         |          |          |   |         |          |          |   |         |          |          |   |         |          |          |   |         |          |          |   |         |         |          |   |          |          |         |   |          |          |         |
| C                                              | -5.45333                                                                                                                                                                                                                                                                                                                                                                                                                                                                                                                                                                                                                                                                                                                                                                                                                                                                                                                                                                                                                                                                                                                                                                                                                                                                                                                                                                                                                                                                                                                                                                                                                                                                                                                                                                                                                                                                                                                                                                                                                                      | -0.08065 | -2.19347 |         |          |   |          |          |         |   |          |          |         |   |          |          |         |   |          |          |          |   |          |          |          |   |          |          |          |   |          |          |          |   |          |          |          |   |          |          |         |   |          |          |          |   |          |          |          |   |         |          |         |   |         |          |         |   |          |         |          |   |         |         |          |   |         |         |          |   |         |          |          |   |         |         |          |   |         |          |          |   |         |          |          |   |         |          |          |   |         |          |          |   |         |          |          |   |         |         |          |   |          |          |         |   |          |          |         |
| N                                              | -5.80285                                                                                                                                                                                                                                                                                                                                                                                                                                                                                                                                                                                                                                                                                                                                                                                                                                                                                                                                                                                                                                                                                                                                                                                                                                                                                                                                                                                                                                                                                                                                                                                                                                                                                                                                                                                                                                                                                                                                                                                                                                      | -0.96324 | -0.16297 |         |          |   |          |          |         |   |          |          |         |   |          |          |         |   |          |          |          |   |          |          |          |   |          |          |          |   |          |          |          |   |          |          |          |   |          |          |         |   |          |          |          |   |          |          |          |   |         |          |         |   |         |          |         |   |          |         |          |   |         |         |          |   |         |         |          |   |         |          |          |   |         |         |          |   |         |          |          |   |         |          |          |   |         |          |          |   |         |          |          |   |         |          |          |   |         |         |          |   |          |          |         |   |          |          |         |
| C                                              | -4.53786                                                                                                                                                                                                                                                                                                                                                                                                                                                                                                                                                                                                                                                                                                                                                                                                                                                                                                                                                                                                                                                                                                                                                                                                                                                                                                                                                                                                                                                                                                                                                                                                                                                                                                                                                                                                                                                                                                                                                                                                                                      | -0.58022 | -0.26057 |         |          |   |          |          |         |   |          |          |         |   |          |          |         |   |          |          |          |   |          |          |          |   |          |          |          |   |          |          |          |   |          |          |          |   |          |          |         |   |          |          |          |   |          |          |          |   |         |          |         |   |         |          |         |   |          |         |          |   |         |         |          |   |         |         |          |   |         |          |          |   |         |         |          |   |         |          |          |   |         |          |          |   |         |          |          |   |         |          |          |   |         |          |          |   |         |         |          |   |          |          |         |   |          |          |         |
| N                                              | -4.27994                                                                                                                                                                                                                                                                                                                                                                                                                                                                                                                                                                                                                                                                                                                                                                                                                                                                                                                                                                                                                                                                                                                                                                                                                                                                                                                                                                                                                                                                                                                                                                                                                                                                                                                                                                                                                                                                                                                                                                                                                                      | -0.04014 | -1.47077 |         |          |   |          |          |         |   |          |          |         |   |          |          |         |   |          |          |          |   |          |          |          |   |          |          |          |   |          |          |          |   |          |          |          |   |          |          |         |   |          |          |          |   |          |          |          |   |         |          |         |   |         |          |         |   |          |         |          |   |         |         |          |   |         |         |          |   |         |          |          |   |         |         |          |   |         |          |          |   |         |          |          |   |         |          |          |   |         |          |          |   |         |          |          |   |         |         |          |   |          |          |         |   |          |          |         |
| C                                              | -5.82503                                                                                                                                                                                                                                                                                                                                                                                                                                                                                                                                                                                                                                                                                                                                                                                                                                                                                                                                                                                                                                                                                                                                                                                                                                                                                                                                                                                                                                                                                                                                                                                                                                                                                                                                                                                                                                                                                                                                                                                                                                      | -2.72795 | 4.34149  |         |          |   |          |          |         |   |          |          |         |   |          |          |         |   |          |          |          |   |          |          |          |   |          |          |          |   |          |          |          |   |          |          |          |   |          |          |         |   |          |          |          |   |          |          |          |   |         |          |         |   |         |          |         |   |          |         |          |   |         |         |          |   |         |         |          |   |         |          |          |   |         |         |          |   |         |          |          |   |         |          |          |   |         |          |          |   |         |          |          |   |         |          |          |   |         |         |          |   |          |          |         |   |          |          |         |
| C                                              | -7.83874                                                                                                                                                                                                                                                                                                                                                                                                                                                                                                                                                                                                                                                                                                                                                                                                                                                                                                                                                                                                                                                                                                                                                                                                                                                                                                                                                                                                                                                                                                                                                                                                                                                                                                                                                                                                                                                                                                                                                                                                                                      | -0.94143 | -1.64473 |         |          |   |          |          |         |   |          |          |         |   |          |          |         |   |          |          |          |   |          |          |          |   |          |          |          |   |          |          |          |   |          |          |          |   |          |          |         |   |          |          |          |   |          |          |          |   |         |          |         |   |         |          |         |   |          |         |          |   |         |         |          |   |         |         |          |   |         |          |          |   |         |         |          |   |         |          |          |   |         |          |          |   |         |          |          |   |         |          |          |   |         |          |          |   |         |         |          |   |          |          |         |   |          |          |         |
| C                                              | -0.70039                                                                                                                                                                                                                                                                                                                                                                                                                                                                                                                                                                                                                                                                                                                                                                                                                                                                                                                                                                                                                                                                                                                                                                                                                                                                                                                                                                                                                                                                                                                                                                                                                                                                                                                                                                                                                                                                                                                                                                                                                                      | -0.13293 | -2.23861 |         |          |   |          |          |         |   |          |          |         |   |          |          |         |   |          |          |          |   |          |          |          |   |          |          |          |   |          |          |          |   |          |          |          |   |          |          |         |   |          |          |          |   |          |          |          |   |         |          |         |   |         |          |         |   |          |         |          |   |         |         |          |   |         |         |          |   |         |          |          |   |         |         |          |   |         |          |          |   |         |          |          |   |         |          |          |   |         |          |          |   |         |          |          |   |         |         |          |   |          |          |         |   |          |          |         |
| C                                              | 0.43835                                                                                                                                                                                                                                                                                                                                                                                                                                                                                                                                                                                                                                                                                                                                                                                                                                                                                                                                                                                                                                                                                                                                                                                                                                                                                                                                                                                                                                                                                                                                                                                                                                                                                                                                                                                                                                                                                                                                                                                                                                       | -0.17896 | 0.02022  |         |          |   |          |          |         |   |          |          |         |   |          |          |         |   |          |          |          |   |          |          |          |   |          |          |          |   |          |          |          |   |          |          |          |   |          |          |         |   |          |          |          |   |          |          |          |   |         |          |         |   |         |          |         |   |          |         |          |   |         |         |          |   |         |         |          |   |         |          |          |   |         |         |          |   |         |          |          |   |         |          |          |   |         |          |          |   |         |          |          |   |         |          |          |   |         |         |          |   |          |          |         |   |          |          |         |
| O                                              | 1.38145                                                                                                                                                                                                                                                                                                                                                                                                                                                                                                                                                                                                                                                                                                                                                                                                                                                                                                                                                                                                                                                                                                                                                                                                                                                                                                                                                                                                                                                                                                                                                                                                                                                                                                                                                                                                                                                                                                                                                                                                                                       | -0.26685 | 0.81015  |         |          |   |          |          |         |   |          |          |         |   |          |          |         |   |          |          |          |   |          |          |          |   |          |          |          |   |          |          |          |   |          |          |          |   |          |          |         |   |          |          |          |   |          |          |          |   |         |          |         |   |         |          |         |   |          |         |          |   |         |         |          |   |         |         |          |   |         |          |          |   |         |         |          |   |         |          |          |   |         |          |          |   |         |          |          |   |         |          |          |   |         |          |          |   |         |         |          |   |          |          |         |   |          |          |         |
| C                                              | -1.59395                                                                                                                                                                                                                                                                                                                                                                                                                                                                                                                                                                                                                                                                                                                                                                                                                                                                                                                                                                                                                                                                                                                                                                                                                                                                                                                                                                                                                                                                                                                                                                                                                                                                                                                                                                                                                                                                                                                                                                                                                                      | 2.02942  | -3.06416 |         |          |   |          |          |         |   |          |          |         |   |          |          |         |   |          |          |          |   |          |          |          |   |          |          |          |   |          |          |          |   |          |          |          |   |          |          |         |   |          |          |          |   |          |          |          |   |         |          |         |   |         |          |         |   |          |         |          |   |         |         |          |   |         |         |          |   |         |          |          |   |         |         |          |   |         |          |          |   |         |          |          |   |         |          |          |   |         |          |          |   |         |          |          |   |         |         |          |   |          |          |         |   |          |          |         |
| C                                              | 0.50668                                                                                                                                                                                                                                                                                                                                                                                                                                                                                                                                                                                                                                                                                                                                                                                                                                                                                                                                                                                                                                                                                                                                                                                                                                                                                                                                                                                                                                                                                                                                                                                                                                                                                                                                                                                                                                                                                                                                                                                                                                       | 0.24253  | -1.37071 |         |          |   |          |          |         |   |          |          |         |   |          |          |         |   |          |          |          |   |          |          |          |   |          |          |          |   |          |          |          |   |          |          |          |   |          |          |         |   |          |          |          |   |          |          |          |   |         |          |         |   |         |          |         |   |          |         |          |   |         |         |          |   |         |         |          |   |         |          |          |   |         |         |          |   |         |          |          |   |         |          |          |   |         |          |          |   |         |          |          |   |         |          |          |   |         |         |          |   |          |          |         |   |          |          |         |
| C                                              | 1.90992                                                                                                                                                                                                                                                                                                                                                                                                                                                                                                                                                                                                                                                                                                                                                                                                                                                                                                                                                                                                                                                                                                                                                                                                                                                                                                                                                                                                                                                                                                                                                                                                                                                                                                                                                                                                                                                                                                                                                                                                                                       | 0.15162  | -1.99385 |         |          |   |          |          |         |   |          |          |         |   |          |          |         |   |          |          |          |   |          |          |          |   |          |          |          |   |          |          |          |   |          |          |          |   |          |          |         |   |          |          |          |   |          |          |          |   |         |          |         |   |         |          |         |   |          |         |          |   |         |         |          |   |         |         |          |   |         |          |          |   |         |         |          |   |         |          |          |   |         |          |          |   |         |          |          |   |         |          |          |   |         |          |          |   |         |         |          |   |          |          |         |   |          |          |         |
| C                                              | 2.60376                                                                                                                                                                                                                                                                                                                                                                                                                                                                                                                                                                                                                                                                                                                                                                                                                                                                                                                                                                                                                                                                                                                                                                                                                                                                                                                                                                                                                                                                                                                                                                                                                                                                                                                                                                                                                                                                                                                                                                                                                                       | -1.21448 | -2.01914 |         |          |   |          |          |         |   |          |          |         |   |          |          |         |   |          |          |          |   |          |          |          |   |          |          |          |   |          |          |          |   |          |          |          |   |          |          |         |   |          |          |          |   |          |          |          |   |         |          |         |   |         |          |         |   |          |         |          |   |         |         |          |   |         |         |          |   |         |          |          |   |         |         |          |   |         |          |          |   |         |          |          |   |         |          |          |   |         |          |          |   |         |          |          |   |         |         |          |   |          |          |         |   |          |          |         |
| O                                              | 2.85958                                                                                                                                                                                                                                                                                                                                                                                                                                                                                                                                                                                                                                                                                                                                                                                                                                                                                                                                                                                                                                                                                                                                                                                                                                                                                                                                                                                                                                                                                                                                                                                                                                                                                                                                                                                                                                                                                                                                                                                                                                       | 1.06981  | -1.41234 |         |          |   |          |          |         |   |          |          |         |   |          |          |         |   |          |          |          |   |          |          |          |   |          |          |          |   |          |          |          |   |          |          |          |   |          |          |         |   |          |          |          |   |          |          |          |   |         |          |         |   |         |          |         |   |          |         |          |   |         |         |          |   |         |         |          |   |         |          |          |   |         |         |          |   |         |          |          |   |         |          |          |   |         |          |          |   |         |          |          |   |         |          |          |   |         |         |          |   |          |          |         |   |          |          |         |
| C                                              | 3.95128                                                                                                                                                                                                                                                                                                                                                                                                                                                                                                                                                                                                                                                                                                                                                                                                                                                                                                                                                                                                                                                                                                                                                                                                                                                                                                                                                                                                                                                                                                                                                                                                                                                                                                                                                                                                                                                                                                                                                                                                                                       | -1.28461 | -2.40757 |         |          |   |          |          |         |   |          |          |         |   |          |          |         |   |          |          |          |   |          |          |          |   |          |          |          |   |          |          |          |   |          |          |          |   |          |          |         |   |          |          |          |   |          |          |          |   |         |          |         |   |         |          |         |   |          |         |          |   |         |         |          |   |         |         |          |   |         |          |          |   |         |         |          |   |         |          |          |   |         |          |          |   |         |          |          |   |         |          |          |   |         |          |          |   |         |         |          |   |          |          |         |   |          |          |         |
| C                                              | 1.93714                                                                                                                                                                                                                                                                                                                                                                                                                                                                                                                                                                                                                                                                                                                                                                                                                                                                                                                                                                                                                                                                                                                                                                                                                                                                                                                                                                                                                                                                                                                                                                                                                                                                                                                                                                                                                                                                                                                                                                                                                                       | -2.41201 | -1.74047 |         |          |   |          |          |         |   |          |          |         |   |          |          |         |   |          |          |          |   |          |          |          |   |          |          |          |   |          |          |          |   |          |          |          |   |          |          |         |   |          |          |          |   |          |          |          |   |         |          |         |   |         |          |         |   |          |         |          |   |         |         |          |   |         |         |          |   |         |          |          |   |         |         |          |   |         |          |          |   |         |          |          |   |         |          |          |   |         |          |          |   |         |          |          |   |         |         |          |   |          |          |         |   |          |          |         |
| C                                              | 4.60973                                                                                                                                                                                                                                                                                                                                                                                                                                                                                                                                                                                                                                                                                                                                                                                                                                                                                                                                                                                                                                                                                                                                                                                                                                                                                                                                                                                                                                                                                                                                                                                                                                                                                                                                                                                                                                                                                                                                                                                                                                       | -2.50975 | -2.50728 |         |          |   |          |          |         |   |          |          |         |   |          |          |         |   |          |          |          |   |          |          |          |   |          |          |          |   |          |          |          |   |          |          |          |   |          |          |         |   |          |          |          |   |          |          |          |   |         |          |         |   |         |          |         |   |          |         |          |   |         |         |          |   |         |         |          |   |         |          |          |   |         |         |          |   |         |          |          |   |         |          |          |   |         |          |          |   |         |          |          |   |         |          |          |   |         |         |          |   |          |          |         |   |          |          |         |
| C                                              | 2.59104                                                                                                                                                                                                                                                                                                                                                                                                                                                                                                                                                                                                                                                                                                                                                                                                                                                                                                                                                                                                                                                                                                                                                                                                                                                                                                                                                                                                                                                                                                                                                                                                                                                                                                                                                                                                                                                                                                                                                                                                                                       | -3.64289 | -1.84531 |         |          |   |          |          |         |   |          |          |         |   |          |          |         |   |          |          |          |   |          |          |          |   |          |          |          |   |          |          |          |   |          |          |          |   |          |          |         |   |          |          |          |   |          |          |          |   |         |          |         |   |         |          |         |   |          |         |          |   |         |         |          |   |         |         |          |   |         |          |          |   |         |         |          |   |         |          |          |   |         |          |          |   |         |          |          |   |         |          |          |   |         |          |          |   |         |         |          |   |          |          |         |   |          |          |         |
| C                                              | 3.93092                                                                                                                                                                                                                                                                                                                                                                                                                                                                                                                                                                                                                                                                                                                                                                                                                                                                                                                                                                                                                                                                                                                                                                                                                                                                                                                                                                                                                                                                                                                                                                                                                                                                                                                                                                                                                                                                                                                                                                                                                                       | -3.69796 | -2.22657 |         |          |   |          |          |         |   |          |          |         |   |          |          |         |   |          |          |          |   |          |          |          |   |          |          |          |   |          |          |          |   |          |          |          |   |          |          |         |   |          |          |          |   |          |          |          |   |         |          |         |   |         |          |         |   |          |         |          |   |         |         |          |   |         |         |          |   |         |          |          |   |         |         |          |   |         |          |          |   |         |          |          |   |         |          |          |   |         |          |          |   |         |          |          |   |         |         |          |   |          |          |         |   |          |          |         |
| H                                              | 0.47985                                                                                                                                                                                                                                                                                                                                                                                                                                                                                                                                                                                                                                                                                                                                                                                                                                                                                                                                                                                                                                                                                                                                                                                                                                                                                                                                                                                                                                                                                                                                                                                                                                                                                                                                                                                                                                                                                                                                                                                                                                       | 1.72340  | -1.17633 |         |          |   |          |          |         |   |          |          |         |   |          |          |         |   |          |          |          |   |          |          |          |   |          |          |          |   |          |          |          |   |          |          |          |   |          |          |         |   |          |          |          |   |          |          |          |   |         |          |         |   |         |          |         |   |          |         |          |   |         |         |          |   |         |         |          |   |         |          |          |   |         |         |          |   |         |          |          |   |         |          |          |   |         |          |          |   |         |          |          |   |         |          |          |   |         |         |          |   |          |          |         |   |          |          |         |
| O                                              | -0.84545                                                                                                                                                                                                                                                                                                                                                                                                                                                                                                                                                                                                                                                                                                                                                                                                                                                                                                                                                                                                                                                                                                                                                                                                                                                                                                                                                                                                                                                                                                                                                                                                                                                                                                                                                                                                                                                                                                                                                                                                                                      | -0.41691 | 0.46895  |         |          |   |          |          |         |   |          |          |         |   |          |          |         |   |          |          |          |   |          |          |          |   |          |          |          |   |          |          |          |   |          |          |          |   |          |          |         |   |          |          |          |   |          |          |          |   |         |          |         |   |         |          |         |   |          |         |          |   |         |         |          |   |         |         |          |   |         |          |          |   |         |         |          |   |         |          |          |   |         |          |          |   |         |          |          |   |         |          |          |   |         |          |          |   |         |         |          |   |          |          |         |   |          |          |         |
| C                                              | -0.95100                                                                                                                                                                                                                                                                                                                                                                                                                                                                                                                                                                                                                                                                                                                                                                                                                                                                                                                                                                                                                                                                                                                                                                                                                                                                                                                                                                                                                                                                                                                                                                                                                                                                                                                                                                                                                                                                                                                                                                                                                                      | -0.72637 | 1.86510  |         |          |   |          |          |         |   |          |          |         |   |          |          |         |   |          |          |          |   |          |          |          |   |          |          |          |   |          |          |          |   |          |          |          |   |          |          |         |   |          |          |          |   |          |          |          |   |         |          |         |   |         |          |         |   |          |         |          |   |         |         |          |   |         |         |          |   |         |          |          |   |         |         |          |   |         |          |          |   |         |          |          |   |         |          |          |   |         |          |          |   |         |          |          |   |         |         |          |   |          |          |         |   |          |          |         |



|   |          |          |          |
|---|----------|----------|----------|
| C | -0.41880 | -0.55088 | -3.68693 |
| C | 4.98191  | -1.84488 | 1.56124  |
| O | 5.80121  | -2.74910 | 1.73215  |
| C | 5.46736  | -0.46494 | 1.08551  |
| N | 4.48878  | 0.59804  | 1.04909  |
| C | 4.38874  | 1.50831  | 2.06304  |
| O | 5.14049  | 1.51706  | 3.03715  |
| C | 3.27962  | 2.53357  | 1.87613  |
| N | 3.64755  | -1.97150 | 1.75690  |
| C | 3.04758  | -3.23220 | 2.13482  |
| H | 2.05049  | -4.55887 | -1.61738 |
| H | 4.44431  | -4.65361 | -2.29621 |
| H | 5.65703  | -2.53758 | -2.79929 |
| H | 4.48143  | -0.36124 | -2.62012 |
| H | 0.89841  | -2.38587 | -1.42518 |
| H | 0.24443  | -1.42022 | -3.71350 |
| H | 0.04908  | 0.24229  | -4.27833 |
| H | -1.36110 | -0.82364 | -4.17680 |
| H | -1.75335 | 1.78845  | -4.12593 |
| H | 1.79837  | 0.44469  | -3.04946 |
| H | -0.60754 | 2.48321  | -2.92930 |
| H | -2.35061 | 2.75515  | -2.75100 |
| H | -1.23290 | -0.96197 | -1.76387 |
| H | -3.36460 | 0.32693  | -1.78122 |
| H | -5.51719 | 0.29517  | -3.20396 |
| H | -8.05981 | -2.01177 | -1.54724 |
| H | -8.49164 | -0.41245 | -0.93907 |
| H | -8.11458 | -0.63039 | -2.65787 |
| H | -3.80041 | -0.68611 | 0.52029  |
| H | -6.27469 | -1.65718 | 1.28896  |
| H | 3.13224  | 3.06944  | 2.81548  |
| H | 2.34656  | 2.05329  | 1.56770  |
| H | 3.55326  | 3.25813  | 1.09954  |
| H | 3.83327  | 0.65162  | 0.26621  |
| H | 6.27145  | -0.16556 | 1.76168  |
| H | 5.89848  | -0.61214 | 0.08839  |
| H | 3.02677  | -1.21075 | 1.49270  |
| H | 2.46512  | -3.65968 | 1.30819  |
| H | 3.85344  | -3.92114 | 2.39531  |
| H | -6.62025 | -2.15073 | 4.82576  |
| H | -2.00234 | -0.94966 | 2.05289  |
| H | -0.33102 | -1.59050 | 2.12090  |
| H | -6.20300 | -3.74656 | 4.20167  |
| H | -0.62776 | 0.12402  | 2.47314  |
| H | -4.93882 | -2.74450 | 4.97749  |
| H | 2.38371  | -3.10350 | 2.99871  |
| O | 0.79430  | 2.85257  | -1.15027 |
| H | 2.38571  | 1.92006  | -1.28964 |
| C | 0.17086  | 3.61865  | -0.23931 |
| C | -1.10465 | 5.31306  | 1.62936  |
| C | -1.01074 | 3.20963  | 0.41362  |
| C | 0.69599  | 4.89217  | 0.05907  |
| C | 0.06351  | 5.72358  | 0.98037  |
| C | -1.62962 | 4.05161  | 1.33712  |
| H | -1.42983 | 2.23450  | 0.18455  |
| H | -2.53796 | 3.71422  | 1.83273  |

|  |   |          |         |          |
|--|---|----------|---------|----------|
|  | H | -1.59375 | 5.96227 | 2.35121  |
|  | H | 0.48981  | 6.70184 | 1.19574  |
|  | H | 1.60543  | 5.20499 | -0.44720 |

Optimized Molecular Properties for **T5-INT3**

|                                                |                                                                                                                                                                                                                                                                                                                                                                                                                                                                                                                                                                                                                                                                                                                            |                          |                   |
|------------------------------------------------|----------------------------------------------------------------------------------------------------------------------------------------------------------------------------------------------------------------------------------------------------------------------------------------------------------------------------------------------------------------------------------------------------------------------------------------------------------------------------------------------------------------------------------------------------------------------------------------------------------------------------------------------------------------------------------------------------------------------------|--------------------------|-------------------|
| Number of<br>(-)<br>Vibrational<br>Frequencies | 0                                                                                                                                                                                                                                                                                                                                                                                                                                                                                                                                                                                                                                                                                                                          |                          |                   |
| Absolute<br>Energies<br>(Hartrees)             | <p><b>B3LYP/6-31G(d)</b></p> <p>There are 27 positive frequencies below 100 cm<sup>-1</sup>.</p> <p>Zero-point correction: 0.711429 hartree<br/>         Enthalpy correction: 0.762901 hartree<br/>         Free Energy correction: 0.613908 hartree<br/>         Quasiharmonic Free Energy correction: 0.636123 hartree</p> <p>SCF Energy: -2065.232789 hartree<br/>         SCF Energy + ZPVE: -2064.521360 hartree<br/>         Enthalpy: -2064.469888 hartree<br/>         Free Energy: -2064.618881 hartree</p> <p>Free Energy with quasiharmonic correction: -2064.596666 hartree<br/>         (correction: 13.94 kcal/mol)</p> <p><b>B3LYP-D3/6-311+G(d,p)</b></p> <p>SCF Done: E(RB3LYP) = -2065.97628837 A.U.</p> |                          |                   |
| Cartesian<br>Coordinates                       | 86<br>spD3-INT3-T5.out                                                                                                                                                                                                                                                                                                                                                                                                                                                                                                                                                                                                                                                                                                     | Energy: -1296419.6836816 |                   |
|                                                | O                                                                                                                                                                                                                                                                                                                                                                                                                                                                                                                                                                                                                                                                                                                          | -1.49916                 | 0.28550 -2.49169  |
|                                                | C                                                                                                                                                                                                                                                                                                                                                                                                                                                                                                                                                                                                                                                                                                                          | -5.25939                 | -2.31098 2.94701  |
|                                                | O                                                                                                                                                                                                                                                                                                                                                                                                                                                                                                                                                                                                                                                                                                                          | -4.12264                 | -2.01447 2.61507  |
|                                                | O                                                                                                                                                                                                                                                                                                                                                                                                                                                                                                                                                                                                                                                                                                                          | -6.33340                 | -2.18160 2.17454  |
|                                                | C                                                                                                                                                                                                                                                                                                                                                                                                                                                                                                                                                                                                                                                                                                                          | -6.23095                 | -0.75536 -1.36377 |
|                                                | C                                                                                                                                                                                                                                                                                                                                                                                                                                                                                                                                                                                                                                                                                                                          | -5.29765                 | -0.26198 -2.24386 |
|                                                | N                                                                                                                                                                                                                                                                                                                                                                                                                                                                                                                                                                                                                                                                                                                          | -5.58798                 | -1.14265 -0.20353 |
|                                                | C                                                                                                                                                                                                                                                                                                                                                                                                                                                                                                                                                                                                                                                                                                                          | -4.30053                 | -0.88495 -0.38714 |
|                                                | N                                                                                                                                                                                                                                                                                                                                                                                                                                                                                                                                                                                                                                                                                                                          | -4.07801                 | -0.35077 -1.60845 |
|                                                | C                                                                                                                                                                                                                                                                                                                                                                                                                                                                                                                                                                                                                                                                                                                          | -5.60565                 | -2.87735 4.31153  |
|                                                | C                                                                                                                                                                                                                                                                                                                                                                                                                                                                                                                                                                                                                                                                                                                          | -7.71174                 | -0.89299 -1.53249 |
|                                                | C                                                                                                                                                                                                                                                                                                                                                                                                                                                                                                                                                                                                                                                                                                                          | -0.53151                 | -0.79755 -2.09401 |
|                                                | C                                                                                                                                                                                                                                                                                                                                                                                                                                                                                                                                                                                                                                                                                                                          | 0.60278                  | -0.47696 0.13261  |
|                                                | O                                                                                                                                                                                                                                                                                                                                                                                                                                                                                                                                                                                                                                                                                                                          | 1.53998                  | -0.32154 0.93663  |
|                                                | C                                                                                                                                                                                                                                                                                                                                                                                                                                                                                                                                                                                                                                                                                                                          | -1.11516                 | 1.14306 -3.54931  |
|                                                | C                                                                                                                                                                                                                                                                                                                                                                                                                                                                                                                                                                                                                                                                                                                          | 0.63352                  | -0.32168 -1.27832 |
|                                                | C                                                                                                                                                                                                                                                                                                                                                                                                                                                                                                                                                                                                                                                                                                                          | 1.97013                  | -0.03111 -1.93071 |
|                                                | C                                                                                                                                                                                                                                                                                                                                                                                                                                                                                                                                                                                                                                                                                                                          | 3.06036                  | -1.10848 -1.85580 |
|                                                | O                                                                                                                                                                                                                                                                                                                                                                                                                                                                                                                                                                                                                                                                                                                          | 2.61304                  | 1.19421 -1.47975  |
|                                                | C                                                                                                                                                                                                                                                                                                                                                                                                                                                                                                                                                                                                                                                                                                                          | 4.35736                  | -0.80672 -2.30082 |
|                                                | C                                                                                                                                                                                                                                                                                                                                                                                                                                                                                                                                                                                                                                                                                                                          | 2.79562                  | -2.41299 -1.43054 |
|                                                | C                                                                                                                                                                                                                                                                                                                                                                                                                                                                                                                                                                                                                                                                                                                          | 5.35759                  | -1.77874 -2.31265 |
|                                                | C                                                                                                                                                                                                                                                                                                                                                                                                                                                                                                                                                                                                                                                                                                                          | 3.79267                  | -3.39172 -1.44640 |
|                                                | C                                                                                                                                                                                                                                                                                                                                                                                                                                                                                                                                                                                                                                                                                                                          | 5.07890                  | -3.07933 -1.88580 |
|                                                | H                                                                                                                                                                                                                                                                                                                                                                                                                                                                                                                                                                                                                                                                                                                          | -0.05909                 | 1.58962 -0.97472  |
|                                                | O                                                                                                                                                                                                                                                                                                                                                                                                                                                                                                                                                                                                                                                                                                                          | -0.66306                 | -0.79453 0.64708  |
|                                                | C                                                                                                                                                                                                                                                                                                                                                                                                                                                                                                                                                                                                                                                                                                                          | -0.70686                 | -1.00438 2.05995  |

|   |          |          |          |
|---|----------|----------|----------|
| C | -0.22520 | -1.65021 | -3.33205 |
| C | 5.41602  | -0.74423 | 1.72919  |
| O | 6.43054  | -1.37963 | 2.02377  |
| C | 5.54424  | 0.66470  | 1.12432  |
| N | 4.32378  | 1.42719  | 0.98010  |
| C | 3.92232  | 2.31346  | 1.93870  |
| O | 4.60644  | 2.60204  | 2.91982  |
| C | 2.54977  | 2.92250  | 1.68941  |
| N | 4.16249  | -1.21899 | 1.89579  |
| C | 3.94541  | -2.56118 | 2.39268  |
| H | 3.56349  | -4.39827 | -1.10331 |
| H | 5.85883  | -3.83681 | -1.88828 |
| H | 6.35832  | -1.52024 | -2.65185 |
| H | 4.57805  | 0.20493  | -2.62829 |
| H | 1.79996  | -2.65427 | -1.07176 |
| H | 0.28967  | -2.56788 | -3.03144 |
| H | 0.41771  | -1.14336 | -4.05890 |
| H | -1.15648 | -1.92834 | -3.84056 |
| H | -1.10378 | 0.62822  | -4.52185 |
| H | 1.77595  | 0.10291  | -3.00735 |
| H | -0.13219 | 1.59455  | -3.37006 |
| H | -1.85364 | 1.95024  | -3.58895 |
| H | -1.17752 | -1.38665 | -1.44268 |
| H | -3.15804 | -0.06627 | -1.98329 |
| H | -5.39536 | 0.13817  | -3.24217 |
| H | -8.03040 | -1.93874 | -1.43767 |
| H | -8.25610 | -0.32031 | -0.77114 |
| H | -8.02757 | -0.53136 | -2.51673 |
| H | -3.52078 | -1.07660 | 0.33580  |
| H | -6.06184 | -1.79150 | 1.26642  |
| H | 2.30722  | 3.59658  | 2.51279  |
| H | 1.79843  | 2.12935  | 1.61570  |
| H | 2.52899  | 3.48204  | 0.74702  |
| H | 3.69127  | 1.21729  | 0.20544  |
| H | 6.22221  | 1.22446  | 1.77234  |
| H | 6.02671  | 0.54714  | 0.14709  |
| H | 3.35607  | -0.71264 | 1.53413  |
| H | 4.36066  | -3.31603 | 1.71245  |
| H | 4.42178  | -2.69463 | 3.37063  |
| H | -6.31617 | -2.21687 | 4.82053  |
| H | -1.73558 | -1.28694 | 2.29188  |
| H | -0.02125 | -1.80367 | 2.36144  |
| H | -6.09214 | -3.85245 | 4.19986  |
| H | -0.42910 | -0.09586 | 2.60385  |
| H | -4.70022 | -2.97999 | 4.91141  |
| H | 2.86853  | -2.71933 | 2.48845  |
| O | 0.05636  | 2.58090  | -0.98687 |
| H | 1.91099  | 1.85439  | -1.34379 |
| C | -0.94425 | 3.22303  | -0.32329 |
| C | -2.97055 | 4.64279  | 0.99590  |
| C | -1.96699 | 2.53107  | 0.34046  |
| C | -0.93519 | 4.62438  | -0.32264 |
| C | -1.94426 | 5.32425  | 0.33625  |
| C | -2.97110 | 3.24592  | 0.99293  |
| H | -1.95829 | 1.44512  | 0.34666  |
| H | -3.75973 | 2.69901  | 1.50406  |

|  |   |          |         |          |
|--|---|----------|---------|----------|
|  | H | -3.75568 | 5.19249 | 1.50835  |
|  | H | -1.92680 | 6.41202 | 0.33338  |
|  | H | -0.13227 | 5.14240 | -0.83914 |

Optimized Molecular Properties for **T5-TS4**

|                                                |                                                                                                                                                                                                                                                                                                                                                                                                                                                                                                                                                                                                                                                                                                                                                                                                                                                                                                                                                                                                                                                                                                                                                                                                                                                                                                                                                                                                                                                                                                                                                                                                                                                                                                                                                                                                                                                                                                                                                                                                                                                    |          |          |          |          |   |          |          |         |   |          |          |         |   |          |          |         |   |          |          |          |   |          |          |          |   |          |          |          |   |          |          |          |   |          |          |          |   |          |          |         |   |          |          |          |   |          |          |          |   |         |          |         |   |         |          |         |   |          |         |          |   |         |          |          |   |         |          |          |   |         |          |          |   |         |         |          |   |         |          |          |   |         |          |          |   |         |          |          |   |         |          |          |   |         |          |          |   |          |          |         |   |          |          |         |   |          |          |          |
|------------------------------------------------|----------------------------------------------------------------------------------------------------------------------------------------------------------------------------------------------------------------------------------------------------------------------------------------------------------------------------------------------------------------------------------------------------------------------------------------------------------------------------------------------------------------------------------------------------------------------------------------------------------------------------------------------------------------------------------------------------------------------------------------------------------------------------------------------------------------------------------------------------------------------------------------------------------------------------------------------------------------------------------------------------------------------------------------------------------------------------------------------------------------------------------------------------------------------------------------------------------------------------------------------------------------------------------------------------------------------------------------------------------------------------------------------------------------------------------------------------------------------------------------------------------------------------------------------------------------------------------------------------------------------------------------------------------------------------------------------------------------------------------------------------------------------------------------------------------------------------------------------------------------------------------------------------------------------------------------------------------------------------------------------------------------------------------------------------|----------|----------|----------|----------|---|----------|----------|---------|---|----------|----------|---------|---|----------|----------|---------|---|----------|----------|----------|---|----------|----------|----------|---|----------|----------|----------|---|----------|----------|----------|---|----------|----------|----------|---|----------|----------|---------|---|----------|----------|----------|---|----------|----------|----------|---|---------|----------|---------|---|---------|----------|---------|---|----------|---------|----------|---|---------|----------|----------|---|---------|----------|----------|---|---------|----------|----------|---|---------|---------|----------|---|---------|----------|----------|---|---------|----------|----------|---|---------|----------|----------|---|---------|----------|----------|---|---------|----------|----------|---|----------|----------|---------|---|----------|----------|---------|---|----------|----------|----------|
| Number of<br>(-)<br>Vibrational<br>Frequencies | 1 (-160.4967)                                                                                                                                                                                                                                                                                                                                                                                                                                                                                                                                                                                                                                                                                                                                                                                                                                                                                                                                                                                                                                                                                                                                                                                                                                                                                                                                                                                                                                                                                                                                                                                                                                                                                                                                                                                                                                                                                                                                                                                                                                      |          |          |          |          |   |          |          |         |   |          |          |         |   |          |          |         |   |          |          |          |   |          |          |          |   |          |          |          |   |          |          |          |   |          |          |          |   |          |          |         |   |          |          |          |   |          |          |          |   |         |          |         |   |         |          |         |   |          |         |          |   |         |          |          |   |         |          |          |   |         |          |          |   |         |         |          |   |         |          |          |   |         |          |          |   |         |          |          |   |         |          |          |   |         |          |          |   |          |          |         |   |          |          |         |   |          |          |          |
| Absolute<br>Energies<br>(Hartrees)             | <p><b>B3LYP/6-31G(d)</b></p> <p>There are 27 positive frequencies below 100 cm<sup>-1</sup>.</p> <p>Zero-point correction: 0.710373 hartree<br/>         Enthalpy correction: 0.761377 hartree<br/>         Free Energy correction: 0.614576 hartree<br/>         Quasiharmonic Free Energy correction: 0.635264 hartree</p> <p>SCF Energy: -2065.232524 hartree<br/>         SCF Energy + ZPVE: -2064.522151 hartree<br/>         Enthalpy: -2064.471147 hartree<br/>         Free Energy: -2064.617948 hartree</p> <p>Free Energy with quasiharmonic correction: -2064.597260 hartree<br/>         (correction: 12.98 kcal/mol)</p> <p><b>B3LYP-D3/6-311+G(d,p)</b></p> <p>SCF Done: E(RB3LYP) = -2065.97533120 A.U.</p>                                                                                                                                                                                                                                                                                                                                                                                                                                                                                                                                                                                                                                                                                                                                                                                                                                                                                                                                                                                                                                                                                                                                                                                                                                                                                                                         |          |          |          |          |   |          |          |         |   |          |          |         |   |          |          |         |   |          |          |          |   |          |          |          |   |          |          |          |   |          |          |          |   |          |          |          |   |          |          |         |   |          |          |          |   |          |          |          |   |         |          |         |   |         |          |         |   |          |         |          |   |         |          |          |   |         |          |          |   |         |          |          |   |         |         |          |   |         |          |          |   |         |          |          |   |         |          |          |   |         |          |          |   |         |          |          |   |          |          |         |   |          |          |         |   |          |          |          |
| Cartesian<br>Coordinates                       | <p>86</p> <p>spD3-TS4-T5.out Energy: -1296419.0830484</p> <table> <tr><td>O</td><td>-1.45619</td><td>-0.09598</td><td>-2.50384</td></tr> <tr><td>C</td><td>-5.39129</td><td>-1.78958</td><td>3.20714</td></tr> <tr><td>O</td><td>-4.23282</td><td>-1.61214</td><td>2.86520</td></tr> <tr><td>O</td><td>-6.44337</td><td>-1.70049</td><td>2.39992</td></tr> <tr><td>C</td><td>-6.21593</td><td>-0.71482</td><td>-1.27422</td></tr> <tr><td>C</td><td>-5.24612</td><td>-0.38522</td><td>-2.19086</td></tr> <tr><td>N</td><td>-5.60631</td><td>-1.02354</td><td>-0.07335</td></tr> <tr><td>C</td><td>-4.30276</td><td>-0.87995</td><td>-0.26988</td></tr> <tr><td>N</td><td>-4.03736</td><td>-0.49502</td><td>-1.53807</td></tr> <tr><td>C</td><td>-5.79323</td><td>-2.14265</td><td>4.62731</td></tr> <tr><td>C</td><td>-7.70237</td><td>-0.76090</td><td>-1.44340</td></tr> <tr><td>C</td><td>-0.53418</td><td>-1.38235</td><td>-1.84567</td></tr> <tr><td>C</td><td>0.54607</td><td>-0.64535</td><td>0.25912</td></tr> <tr><td>O</td><td>1.47308</td><td>-0.30933</td><td>1.01368</td></tr> <tr><td>C</td><td>-1.29576</td><td>0.21145</td><td>-3.87662</td></tr> <tr><td>C</td><td>0.62632</td><td>-0.91655</td><td>-1.13615</td></tr> <tr><td>C</td><td>1.91640</td><td>-0.60159</td><td>-1.85439</td></tr> <tr><td>C</td><td>3.11765</td><td>-1.50880</td><td>-1.57897</td></tr> <tr><td>O</td><td>2.37582</td><td>0.76250</td><td>-1.66729</td></tr> <tr><td>C</td><td>4.39969</td><td>-1.11567</td><td>-1.99266</td></tr> <tr><td>C</td><td>2.96437</td><td>-2.77610</td><td>-1.00912</td></tr> <tr><td>C</td><td>5.49627</td><td>-1.96263</td><td>-1.82992</td></tr> <tr><td>C</td><td>4.05919</td><td>-3.62849</td><td>-0.84842</td></tr> <tr><td>C</td><td>5.33108</td><td>-3.22532</td><td>-1.25604</td></tr> <tr><td>O</td><td>-0.73261</td><td>-0.78768</td><td>0.80059</td></tr> <tr><td>C</td><td>-0.81486</td><td>-0.62427</td><td>2.21793</td></tr> <tr><td>C</td><td>-0.39025</td><td>-2.38265</td><td>-2.98212</td></tr> </table> | O        | -1.45619 | -0.09598 | -2.50384 | C | -5.39129 | -1.78958 | 3.20714 | O | -4.23282 | -1.61214 | 2.86520 | O | -6.44337 | -1.70049 | 2.39992 | C | -6.21593 | -0.71482 | -1.27422 | C | -5.24612 | -0.38522 | -2.19086 | N | -5.60631 | -1.02354 | -0.07335 | C | -4.30276 | -0.87995 | -0.26988 | N | -4.03736 | -0.49502 | -1.53807 | C | -5.79323 | -2.14265 | 4.62731 | C | -7.70237 | -0.76090 | -1.44340 | C | -0.53418 | -1.38235 | -1.84567 | C | 0.54607 | -0.64535 | 0.25912 | O | 1.47308 | -0.30933 | 1.01368 | C | -1.29576 | 0.21145 | -3.87662 | C | 0.62632 | -0.91655 | -1.13615 | C | 1.91640 | -0.60159 | -1.85439 | C | 3.11765 | -1.50880 | -1.57897 | O | 2.37582 | 0.76250 | -1.66729 | C | 4.39969 | -1.11567 | -1.99266 | C | 2.96437 | -2.77610 | -1.00912 | C | 5.49627 | -1.96263 | -1.82992 | C | 4.05919 | -3.62849 | -0.84842 | C | 5.33108 | -3.22532 | -1.25604 | O | -0.73261 | -0.78768 | 0.80059 | C | -0.81486 | -0.62427 | 2.21793 | C | -0.39025 | -2.38265 | -2.98212 |
| O                                              | -1.45619                                                                                                                                                                                                                                                                                                                                                                                                                                                                                                                                                                                                                                                                                                                                                                                                                                                                                                                                                                                                                                                                                                                                                                                                                                                                                                                                                                                                                                                                                                                                                                                                                                                                                                                                                                                                                                                                                                                                                                                                                                           | -0.09598 | -2.50384 |          |          |   |          |          |         |   |          |          |         |   |          |          |         |   |          |          |          |   |          |          |          |   |          |          |          |   |          |          |          |   |          |          |          |   |          |          |         |   |          |          |          |   |          |          |          |   |         |          |         |   |         |          |         |   |          |         |          |   |         |          |          |   |         |          |          |   |         |          |          |   |         |         |          |   |         |          |          |   |         |          |          |   |         |          |          |   |         |          |          |   |         |          |          |   |          |          |         |   |          |          |         |   |          |          |          |
| C                                              | -5.39129                                                                                                                                                                                                                                                                                                                                                                                                                                                                                                                                                                                                                                                                                                                                                                                                                                                                                                                                                                                                                                                                                                                                                                                                                                                                                                                                                                                                                                                                                                                                                                                                                                                                                                                                                                                                                                                                                                                                                                                                                                           | -1.78958 | 3.20714  |          |          |   |          |          |         |   |          |          |         |   |          |          |         |   |          |          |          |   |          |          |          |   |          |          |          |   |          |          |          |   |          |          |          |   |          |          |         |   |          |          |          |   |          |          |          |   |         |          |         |   |         |          |         |   |          |         |          |   |         |          |          |   |         |          |          |   |         |          |          |   |         |         |          |   |         |          |          |   |         |          |          |   |         |          |          |   |         |          |          |   |         |          |          |   |          |          |         |   |          |          |         |   |          |          |          |
| O                                              | -4.23282                                                                                                                                                                                                                                                                                                                                                                                                                                                                                                                                                                                                                                                                                                                                                                                                                                                                                                                                                                                                                                                                                                                                                                                                                                                                                                                                                                                                                                                                                                                                                                                                                                                                                                                                                                                                                                                                                                                                                                                                                                           | -1.61214 | 2.86520  |          |          |   |          |          |         |   |          |          |         |   |          |          |         |   |          |          |          |   |          |          |          |   |          |          |          |   |          |          |          |   |          |          |          |   |          |          |         |   |          |          |          |   |          |          |          |   |         |          |         |   |         |          |         |   |          |         |          |   |         |          |          |   |         |          |          |   |         |          |          |   |         |         |          |   |         |          |          |   |         |          |          |   |         |          |          |   |         |          |          |   |         |          |          |   |          |          |         |   |          |          |         |   |          |          |          |
| O                                              | -6.44337                                                                                                                                                                                                                                                                                                                                                                                                                                                                                                                                                                                                                                                                                                                                                                                                                                                                                                                                                                                                                                                                                                                                                                                                                                                                                                                                                                                                                                                                                                                                                                                                                                                                                                                                                                                                                                                                                                                                                                                                                                           | -1.70049 | 2.39992  |          |          |   |          |          |         |   |          |          |         |   |          |          |         |   |          |          |          |   |          |          |          |   |          |          |          |   |          |          |          |   |          |          |          |   |          |          |         |   |          |          |          |   |          |          |          |   |         |          |         |   |         |          |         |   |          |         |          |   |         |          |          |   |         |          |          |   |         |          |          |   |         |         |          |   |         |          |          |   |         |          |          |   |         |          |          |   |         |          |          |   |         |          |          |   |          |          |         |   |          |          |         |   |          |          |          |
| C                                              | -6.21593                                                                                                                                                                                                                                                                                                                                                                                                                                                                                                                                                                                                                                                                                                                                                                                                                                                                                                                                                                                                                                                                                                                                                                                                                                                                                                                                                                                                                                                                                                                                                                                                                                                                                                                                                                                                                                                                                                                                                                                                                                           | -0.71482 | -1.27422 |          |          |   |          |          |         |   |          |          |         |   |          |          |         |   |          |          |          |   |          |          |          |   |          |          |          |   |          |          |          |   |          |          |          |   |          |          |         |   |          |          |          |   |          |          |          |   |         |          |         |   |         |          |         |   |          |         |          |   |         |          |          |   |         |          |          |   |         |          |          |   |         |         |          |   |         |          |          |   |         |          |          |   |         |          |          |   |         |          |          |   |         |          |          |   |          |          |         |   |          |          |         |   |          |          |          |
| C                                              | -5.24612                                                                                                                                                                                                                                                                                                                                                                                                                                                                                                                                                                                                                                                                                                                                                                                                                                                                                                                                                                                                                                                                                                                                                                                                                                                                                                                                                                                                                                                                                                                                                                                                                                                                                                                                                                                                                                                                                                                                                                                                                                           | -0.38522 | -2.19086 |          |          |   |          |          |         |   |          |          |         |   |          |          |         |   |          |          |          |   |          |          |          |   |          |          |          |   |          |          |          |   |          |          |          |   |          |          |         |   |          |          |          |   |          |          |          |   |         |          |         |   |         |          |         |   |          |         |          |   |         |          |          |   |         |          |          |   |         |          |          |   |         |         |          |   |         |          |          |   |         |          |          |   |         |          |          |   |         |          |          |   |         |          |          |   |          |          |         |   |          |          |         |   |          |          |          |
| N                                              | -5.60631                                                                                                                                                                                                                                                                                                                                                                                                                                                                                                                                                                                                                                                                                                                                                                                                                                                                                                                                                                                                                                                                                                                                                                                                                                                                                                                                                                                                                                                                                                                                                                                                                                                                                                                                                                                                                                                                                                                                                                                                                                           | -1.02354 | -0.07335 |          |          |   |          |          |         |   |          |          |         |   |          |          |         |   |          |          |          |   |          |          |          |   |          |          |          |   |          |          |          |   |          |          |          |   |          |          |         |   |          |          |          |   |          |          |          |   |         |          |         |   |         |          |         |   |          |         |          |   |         |          |          |   |         |          |          |   |         |          |          |   |         |         |          |   |         |          |          |   |         |          |          |   |         |          |          |   |         |          |          |   |         |          |          |   |          |          |         |   |          |          |         |   |          |          |          |
| C                                              | -4.30276                                                                                                                                                                                                                                                                                                                                                                                                                                                                                                                                                                                                                                                                                                                                                                                                                                                                                                                                                                                                                                                                                                                                                                                                                                                                                                                                                                                                                                                                                                                                                                                                                                                                                                                                                                                                                                                                                                                                                                                                                                           | -0.87995 | -0.26988 |          |          |   |          |          |         |   |          |          |         |   |          |          |         |   |          |          |          |   |          |          |          |   |          |          |          |   |          |          |          |   |          |          |          |   |          |          |         |   |          |          |          |   |          |          |          |   |         |          |         |   |         |          |         |   |          |         |          |   |         |          |          |   |         |          |          |   |         |          |          |   |         |         |          |   |         |          |          |   |         |          |          |   |         |          |          |   |         |          |          |   |         |          |          |   |          |          |         |   |          |          |         |   |          |          |          |
| N                                              | -4.03736                                                                                                                                                                                                                                                                                                                                                                                                                                                                                                                                                                                                                                                                                                                                                                                                                                                                                                                                                                                                                                                                                                                                                                                                                                                                                                                                                                                                                                                                                                                                                                                                                                                                                                                                                                                                                                                                                                                                                                                                                                           | -0.49502 | -1.53807 |          |          |   |          |          |         |   |          |          |         |   |          |          |         |   |          |          |          |   |          |          |          |   |          |          |          |   |          |          |          |   |          |          |          |   |          |          |         |   |          |          |          |   |          |          |          |   |         |          |         |   |         |          |         |   |          |         |          |   |         |          |          |   |         |          |          |   |         |          |          |   |         |         |          |   |         |          |          |   |         |          |          |   |         |          |          |   |         |          |          |   |         |          |          |   |          |          |         |   |          |          |         |   |          |          |          |
| C                                              | -5.79323                                                                                                                                                                                                                                                                                                                                                                                                                                                                                                                                                                                                                                                                                                                                                                                                                                                                                                                                                                                                                                                                                                                                                                                                                                                                                                                                                                                                                                                                                                                                                                                                                                                                                                                                                                                                                                                                                                                                                                                                                                           | -2.14265 | 4.62731  |          |          |   |          |          |         |   |          |          |         |   |          |          |         |   |          |          |          |   |          |          |          |   |          |          |          |   |          |          |          |   |          |          |          |   |          |          |         |   |          |          |          |   |          |          |          |   |         |          |         |   |         |          |         |   |          |         |          |   |         |          |          |   |         |          |          |   |         |          |          |   |         |         |          |   |         |          |          |   |         |          |          |   |         |          |          |   |         |          |          |   |         |          |          |   |          |          |         |   |          |          |         |   |          |          |          |
| C                                              | -7.70237                                                                                                                                                                                                                                                                                                                                                                                                                                                                                                                                                                                                                                                                                                                                                                                                                                                                                                                                                                                                                                                                                                                                                                                                                                                                                                                                                                                                                                                                                                                                                                                                                                                                                                                                                                                                                                                                                                                                                                                                                                           | -0.76090 | -1.44340 |          |          |   |          |          |         |   |          |          |         |   |          |          |         |   |          |          |          |   |          |          |          |   |          |          |          |   |          |          |          |   |          |          |          |   |          |          |         |   |          |          |          |   |          |          |          |   |         |          |         |   |         |          |         |   |          |         |          |   |         |          |          |   |         |          |          |   |         |          |          |   |         |         |          |   |         |          |          |   |         |          |          |   |         |          |          |   |         |          |          |   |         |          |          |   |          |          |         |   |          |          |         |   |          |          |          |
| C                                              | -0.53418                                                                                                                                                                                                                                                                                                                                                                                                                                                                                                                                                                                                                                                                                                                                                                                                                                                                                                                                                                                                                                                                                                                                                                                                                                                                                                                                                                                                                                                                                                                                                                                                                                                                                                                                                                                                                                                                                                                                                                                                                                           | -1.38235 | -1.84567 |          |          |   |          |          |         |   |          |          |         |   |          |          |         |   |          |          |          |   |          |          |          |   |          |          |          |   |          |          |          |   |          |          |          |   |          |          |         |   |          |          |          |   |          |          |          |   |         |          |         |   |         |          |         |   |          |         |          |   |         |          |          |   |         |          |          |   |         |          |          |   |         |         |          |   |         |          |          |   |         |          |          |   |         |          |          |   |         |          |          |   |         |          |          |   |          |          |         |   |          |          |         |   |          |          |          |
| C                                              | 0.54607                                                                                                                                                                                                                                                                                                                                                                                                                                                                                                                                                                                                                                                                                                                                                                                                                                                                                                                                                                                                                                                                                                                                                                                                                                                                                                                                                                                                                                                                                                                                                                                                                                                                                                                                                                                                                                                                                                                                                                                                                                            | -0.64535 | 0.25912  |          |          |   |          |          |         |   |          |          |         |   |          |          |         |   |          |          |          |   |          |          |          |   |          |          |          |   |          |          |          |   |          |          |          |   |          |          |         |   |          |          |          |   |          |          |          |   |         |          |         |   |         |          |         |   |          |         |          |   |         |          |          |   |         |          |          |   |         |          |          |   |         |         |          |   |         |          |          |   |         |          |          |   |         |          |          |   |         |          |          |   |         |          |          |   |          |          |         |   |          |          |         |   |          |          |          |
| O                                              | 1.47308                                                                                                                                                                                                                                                                                                                                                                                                                                                                                                                                                                                                                                                                                                                                                                                                                                                                                                                                                                                                                                                                                                                                                                                                                                                                                                                                                                                                                                                                                                                                                                                                                                                                                                                                                                                                                                                                                                                                                                                                                                            | -0.30933 | 1.01368  |          |          |   |          |          |         |   |          |          |         |   |          |          |         |   |          |          |          |   |          |          |          |   |          |          |          |   |          |          |          |   |          |          |          |   |          |          |         |   |          |          |          |   |          |          |          |   |         |          |         |   |         |          |         |   |          |         |          |   |         |          |          |   |         |          |          |   |         |          |          |   |         |         |          |   |         |          |          |   |         |          |          |   |         |          |          |   |         |          |          |   |         |          |          |   |          |          |         |   |          |          |         |   |          |          |          |
| C                                              | -1.29576                                                                                                                                                                                                                                                                                                                                                                                                                                                                                                                                                                                                                                                                                                                                                                                                                                                                                                                                                                                                                                                                                                                                                                                                                                                                                                                                                                                                                                                                                                                                                                                                                                                                                                                                                                                                                                                                                                                                                                                                                                           | 0.21145  | -3.87662 |          |          |   |          |          |         |   |          |          |         |   |          |          |         |   |          |          |          |   |          |          |          |   |          |          |          |   |          |          |          |   |          |          |          |   |          |          |         |   |          |          |          |   |          |          |          |   |         |          |         |   |         |          |         |   |          |         |          |   |         |          |          |   |         |          |          |   |         |          |          |   |         |         |          |   |         |          |          |   |         |          |          |   |         |          |          |   |         |          |          |   |         |          |          |   |          |          |         |   |          |          |         |   |          |          |          |
| C                                              | 0.62632                                                                                                                                                                                                                                                                                                                                                                                                                                                                                                                                                                                                                                                                                                                                                                                                                                                                                                                                                                                                                                                                                                                                                                                                                                                                                                                                                                                                                                                                                                                                                                                                                                                                                                                                                                                                                                                                                                                                                                                                                                            | -0.91655 | -1.13615 |          |          |   |          |          |         |   |          |          |         |   |          |          |         |   |          |          |          |   |          |          |          |   |          |          |          |   |          |          |          |   |          |          |          |   |          |          |         |   |          |          |          |   |          |          |          |   |         |          |         |   |         |          |         |   |          |         |          |   |         |          |          |   |         |          |          |   |         |          |          |   |         |         |          |   |         |          |          |   |         |          |          |   |         |          |          |   |         |          |          |   |         |          |          |   |          |          |         |   |          |          |         |   |          |          |          |
| C                                              | 1.91640                                                                                                                                                                                                                                                                                                                                                                                                                                                                                                                                                                                                                                                                                                                                                                                                                                                                                                                                                                                                                                                                                                                                                                                                                                                                                                                                                                                                                                                                                                                                                                                                                                                                                                                                                                                                                                                                                                                                                                                                                                            | -0.60159 | -1.85439 |          |          |   |          |          |         |   |          |          |         |   |          |          |         |   |          |          |          |   |          |          |          |   |          |          |          |   |          |          |          |   |          |          |          |   |          |          |         |   |          |          |          |   |          |          |          |   |         |          |         |   |         |          |         |   |          |         |          |   |         |          |          |   |         |          |          |   |         |          |          |   |         |         |          |   |         |          |          |   |         |          |          |   |         |          |          |   |         |          |          |   |         |          |          |   |          |          |         |   |          |          |         |   |          |          |          |
| C                                              | 3.11765                                                                                                                                                                                                                                                                                                                                                                                                                                                                                                                                                                                                                                                                                                                                                                                                                                                                                                                                                                                                                                                                                                                                                                                                                                                                                                                                                                                                                                                                                                                                                                                                                                                                                                                                                                                                                                                                                                                                                                                                                                            | -1.50880 | -1.57897 |          |          |   |          |          |         |   |          |          |         |   |          |          |         |   |          |          |          |   |          |          |          |   |          |          |          |   |          |          |          |   |          |          |          |   |          |          |         |   |          |          |          |   |          |          |          |   |         |          |         |   |         |          |         |   |          |         |          |   |         |          |          |   |         |          |          |   |         |          |          |   |         |         |          |   |         |          |          |   |         |          |          |   |         |          |          |   |         |          |          |   |         |          |          |   |          |          |         |   |          |          |         |   |          |          |          |
| O                                              | 2.37582                                                                                                                                                                                                                                                                                                                                                                                                                                                                                                                                                                                                                                                                                                                                                                                                                                                                                                                                                                                                                                                                                                                                                                                                                                                                                                                                                                                                                                                                                                                                                                                                                                                                                                                                                                                                                                                                                                                                                                                                                                            | 0.76250  | -1.66729 |          |          |   |          |          |         |   |          |          |         |   |          |          |         |   |          |          |          |   |          |          |          |   |          |          |          |   |          |          |          |   |          |          |          |   |          |          |         |   |          |          |          |   |          |          |          |   |         |          |         |   |         |          |         |   |          |         |          |   |         |          |          |   |         |          |          |   |         |          |          |   |         |         |          |   |         |          |          |   |         |          |          |   |         |          |          |   |         |          |          |   |         |          |          |   |          |          |         |   |          |          |         |   |          |          |          |
| C                                              | 4.39969                                                                                                                                                                                                                                                                                                                                                                                                                                                                                                                                                                                                                                                                                                                                                                                                                                                                                                                                                                                                                                                                                                                                                                                                                                                                                                                                                                                                                                                                                                                                                                                                                                                                                                                                                                                                                                                                                                                                                                                                                                            | -1.11567 | -1.99266 |          |          |   |          |          |         |   |          |          |         |   |          |          |         |   |          |          |          |   |          |          |          |   |          |          |          |   |          |          |          |   |          |          |          |   |          |          |         |   |          |          |          |   |          |          |          |   |         |          |         |   |         |          |         |   |          |         |          |   |         |          |          |   |         |          |          |   |         |          |          |   |         |         |          |   |         |          |          |   |         |          |          |   |         |          |          |   |         |          |          |   |         |          |          |   |          |          |         |   |          |          |         |   |          |          |          |
| C                                              | 2.96437                                                                                                                                                                                                                                                                                                                                                                                                                                                                                                                                                                                                                                                                                                                                                                                                                                                                                                                                                                                                                                                                                                                                                                                                                                                                                                                                                                                                                                                                                                                                                                                                                                                                                                                                                                                                                                                                                                                                                                                                                                            | -2.77610 | -1.00912 |          |          |   |          |          |         |   |          |          |         |   |          |          |         |   |          |          |          |   |          |          |          |   |          |          |          |   |          |          |          |   |          |          |          |   |          |          |         |   |          |          |          |   |          |          |          |   |         |          |         |   |         |          |         |   |          |         |          |   |         |          |          |   |         |          |          |   |         |          |          |   |         |         |          |   |         |          |          |   |         |          |          |   |         |          |          |   |         |          |          |   |         |          |          |   |          |          |         |   |          |          |         |   |          |          |          |
| C                                              | 5.49627                                                                                                                                                                                                                                                                                                                                                                                                                                                                                                                                                                                                                                                                                                                                                                                                                                                                                                                                                                                                                                                                                                                                                                                                                                                                                                                                                                                                                                                                                                                                                                                                                                                                                                                                                                                                                                                                                                                                                                                                                                            | -1.96263 | -1.82992 |          |          |   |          |          |         |   |          |          |         |   |          |          |         |   |          |          |          |   |          |          |          |   |          |          |          |   |          |          |          |   |          |          |          |   |          |          |         |   |          |          |          |   |          |          |          |   |         |          |         |   |         |          |         |   |          |         |          |   |         |          |          |   |         |          |          |   |         |          |          |   |         |         |          |   |         |          |          |   |         |          |          |   |         |          |          |   |         |          |          |   |         |          |          |   |          |          |         |   |          |          |         |   |          |          |          |
| C                                              | 4.05919                                                                                                                                                                                                                                                                                                                                                                                                                                                                                                                                                                                                                                                                                                                                                                                                                                                                                                                                                                                                                                                                                                                                                                                                                                                                                                                                                                                                                                                                                                                                                                                                                                                                                                                                                                                                                                                                                                                                                                                                                                            | -3.62849 | -0.84842 |          |          |   |          |          |         |   |          |          |         |   |          |          |         |   |          |          |          |   |          |          |          |   |          |          |          |   |          |          |          |   |          |          |          |   |          |          |         |   |          |          |          |   |          |          |          |   |         |          |         |   |         |          |         |   |          |         |          |   |         |          |          |   |         |          |          |   |         |          |          |   |         |         |          |   |         |          |          |   |         |          |          |   |         |          |          |   |         |          |          |   |         |          |          |   |          |          |         |   |          |          |         |   |          |          |          |
| C                                              | 5.33108                                                                                                                                                                                                                                                                                                                                                                                                                                                                                                                                                                                                                                                                                                                                                                                                                                                                                                                                                                                                                                                                                                                                                                                                                                                                                                                                                                                                                                                                                                                                                                                                                                                                                                                                                                                                                                                                                                                                                                                                                                            | -3.22532 | -1.25604 |          |          |   |          |          |         |   |          |          |         |   |          |          |         |   |          |          |          |   |          |          |          |   |          |          |          |   |          |          |          |   |          |          |          |   |          |          |         |   |          |          |          |   |          |          |          |   |         |          |         |   |         |          |         |   |          |         |          |   |         |          |          |   |         |          |          |   |         |          |          |   |         |         |          |   |         |          |          |   |         |          |          |   |         |          |          |   |         |          |          |   |         |          |          |   |          |          |         |   |          |          |         |   |          |          |          |
| O                                              | -0.73261                                                                                                                                                                                                                                                                                                                                                                                                                                                                                                                                                                                                                                                                                                                                                                                                                                                                                                                                                                                                                                                                                                                                                                                                                                                                                                                                                                                                                                                                                                                                                                                                                                                                                                                                                                                                                                                                                                                                                                                                                                           | -0.78768 | 0.80059  |          |          |   |          |          |         |   |          |          |         |   |          |          |         |   |          |          |          |   |          |          |          |   |          |          |          |   |          |          |          |   |          |          |          |   |          |          |         |   |          |          |          |   |          |          |          |   |         |          |         |   |         |          |         |   |          |         |          |   |         |          |          |   |         |          |          |   |         |          |          |   |         |         |          |   |         |          |          |   |         |          |          |   |         |          |          |   |         |          |          |   |         |          |          |   |          |          |         |   |          |          |         |   |          |          |          |
| C                                              | -0.81486                                                                                                                                                                                                                                                                                                                                                                                                                                                                                                                                                                                                                                                                                                                                                                                                                                                                                                                                                                                                                                                                                                                                                                                                                                                                                                                                                                                                                                                                                                                                                                                                                                                                                                                                                                                                                                                                                                                                                                                                                                           | -0.62427 | 2.21793  |          |          |   |          |          |         |   |          |          |         |   |          |          |         |   |          |          |          |   |          |          |          |   |          |          |          |   |          |          |          |   |          |          |          |   |          |          |         |   |          |          |          |   |          |          |          |   |         |          |         |   |         |          |         |   |          |         |          |   |         |          |          |   |         |          |          |   |         |          |          |   |         |         |          |   |         |          |          |   |         |          |          |   |         |          |          |   |         |          |          |   |         |          |          |   |          |          |         |   |          |          |         |   |          |          |          |
| C                                              | -0.39025                                                                                                                                                                                                                                                                                                                                                                                                                                                                                                                                                                                                                                                                                                                                                                                                                                                                                                                                                                                                                                                                                                                                                                                                                                                                                                                                                                                                                                                                                                                                                                                                                                                                                                                                                                                                                                                                                                                                                                                                                                           | -2.38265 | -2.98212 |          |          |   |          |          |         |   |          |          |         |   |          |          |         |   |          |          |          |   |          |          |          |   |          |          |          |   |          |          |          |   |          |          |          |   |          |          |         |   |          |          |          |   |          |          |          |   |         |          |         |   |         |          |         |   |          |         |          |   |         |          |          |   |         |          |          |   |         |          |          |   |         |         |          |   |         |          |          |   |         |          |          |   |         |          |          |   |         |          |          |   |         |          |          |   |          |          |         |   |          |          |         |   |          |          |          |

|   |          |          |          |
|---|----------|----------|----------|
| C | 5.37525  | -0.32135 | 1.80698  |
| O | 6.43062  | -0.82116 | 2.20227  |
| C | 5.40735  | 0.96524  | 0.96414  |
| N | 4.13753  | 1.60190  | 0.69030  |
| C | 3.67773  | 2.62605  | 1.46937  |
| O | 4.34004  | 3.13468  | 2.37304  |
| C | 2.27101  | 3.08952  | 1.12473  |
| N | 4.15769  | -0.84706 | 2.06204  |
| C | 4.03167  | -2.09407 | 2.78655  |
| H | 3.91746  | -4.60702 | -0.39440 |
| H | 6.18650  | -3.88269 | -1.12125 |
| H | 6.48382  | -1.63480 | -2.14699 |
| H | 4.52985  | -0.13381 | -2.43759 |
| H | 1.97491  | -3.08129 | -0.68143 |
| H | 0.00762  | -3.31724 | -2.57126 |
| H | 0.30017  | -2.05455 | -3.76477 |
| H | -1.35767 | -2.60406 | -3.44655 |
| H | -1.70012 | -0.57391 | -4.53245 |
| H | 1.71618  | -0.71699 | -2.93351 |
| H | -0.24061 | 0.37340  | -4.14139 |
| H | -1.83442 | 1.14489  | -4.08535 |
| H | -1.30715 | -1.70776 | -1.15584 |
| H | -8.09785 | -1.76435 | -1.24133 |
| H | -8.20537 | -0.07172 | -0.75346 |
| H | -7.98749 | -0.48443 | -2.46397 |
| H | 1.56445  | 2.26436  | 1.26361  |
| H | 2.20164  | 3.40623  | 0.07805  |
| H | 2.00205  | 3.92564  | 1.77222  |
| H | 3.52129  | 1.21193  | -0.02509 |
| H | 6.03376  | 1.67899  | 1.50362  |
| H | 5.91038  | 0.71461  | 0.02335  |
| H | 3.31994  | -0.46799 | 1.62447  |
| H | 2.96783  | -2.31016 | 2.91031  |
| H | 4.50690  | -2.92347 | 2.24721  |
| H | -4.90495 | -2.22032 | 5.25592  |
| H | -1.84173 | -0.87527 | 2.49100  |
| H | -0.11378 | -1.28890 | 2.73289  |
| H | -6.46560 | -1.37545 | 5.02673  |
| H | -0.58492 | 0.40603  | 2.50937  |
| H | -6.34150 | -3.09097 | 4.63682  |
| H | 4.50584  | -2.02006 | 3.77191  |
| O | -0.24599 | 2.19751  | -1.79616 |
| H | -3.09325 | -0.31614 | -1.93512 |
| H | -5.31243 | -0.08461 | -3.22611 |
| H | -3.54151 | -1.04674 | 0.47859  |
| H | -6.13522 | -1.45015 | 1.45423  |
| H | -0.71278 | 1.31466  | -1.84231 |
| H | 1.57524  | 1.32266  | -1.64838 |
| C | -0.90994 | 3.06266  | -0.97995 |
| C | -2.22449 | 4.92617  | 0.65406  |
| C | -0.59159 | 4.42492  | -1.06689 |
| C | -1.88274 | 2.63311  | -0.06580 |
| C | -2.53461 | 3.56715  | 0.73937  |
| C | -1.24550 | 5.34576  | -0.25063 |
| H | 0.16549  | 4.73898  | -1.77962 |
| H | -2.10174 | 1.57331  | 0.02292  |

|  |   |          |         |          |
|--|---|----------|---------|----------|
|  | H | -3.28634 | 3.22225 | 1.44526  |
|  | H | -0.98815 | 6.40006 | -0.32433 |
|  | H | -2.73276 | 5.64737 | 1.28856  |



Optimized Molecular Properties for **T5-product**

|                                                |                                                                                                                                                                                                                                                                                                                                                                                                                                                                                                                                                                                                                                                                                                                            |                                                                                                                                                                                                                                                                                                                                                                                                                                                                                                                                                                                                                                                                                                                                                                                                                                                                                                                                                                                                                                                                                                                                                                                                 |  |
|------------------------------------------------|----------------------------------------------------------------------------------------------------------------------------------------------------------------------------------------------------------------------------------------------------------------------------------------------------------------------------------------------------------------------------------------------------------------------------------------------------------------------------------------------------------------------------------------------------------------------------------------------------------------------------------------------------------------------------------------------------------------------------|-------------------------------------------------------------------------------------------------------------------------------------------------------------------------------------------------------------------------------------------------------------------------------------------------------------------------------------------------------------------------------------------------------------------------------------------------------------------------------------------------------------------------------------------------------------------------------------------------------------------------------------------------------------------------------------------------------------------------------------------------------------------------------------------------------------------------------------------------------------------------------------------------------------------------------------------------------------------------------------------------------------------------------------------------------------------------------------------------------------------------------------------------------------------------------------------------|--|
| Number of<br>(-)<br>Vibrational<br>Frequencies | 0                                                                                                                                                                                                                                                                                                                                                                                                                                                                                                                                                                                                                                                                                                                          |                                                                                                                                                                                                                                                                                                                                                                                                                                                                                                                                                                                                                                                                                                                                                                                                                                                                                                                                                                                                                                                                                                                                                                                                 |  |
| Absolute<br>Energies<br>(Hartrees)             | <p><b>B3LYP/6-31G(d)</b></p> <p>There are 27 positive frequencies below 100 cm<sup>-1</sup>.</p> <p>Zero-point correction: 0.709167 hartree<br/>         Enthalpy correction: 0.761500 hartree<br/>         Free Energy correction: 0.608853 hartree<br/>         Quasiharmonic Free Energy correction: 0.632624 hartree</p> <p>SCF Energy: -2065.270187 hartree<br/>         SCF Energy + ZPVE: -2064.561020 hartree<br/>         Enthalpy: -2064.508687 hartree<br/>         Free Energy: -2064.661334 hartree</p> <p>Free Energy with quasiharmonic correction: -2064.637563 hartree<br/>         (correction: 14.92 kcal/mol)</p> <p><b>B3LYP-D3/6-311+G(d,p)</b></p> <p>SCF Done: E(RB3LYP) = -2066.00660423 A.U.</p> |                                                                                                                                                                                                                                                                                                                                                                                                                                                                                                                                                                                                                                                                                                                                                                                                                                                                                                                                                                                                                                                                                                                                                                                                 |  |
| Cartesian<br>Coordinates                       | 86                                                                                                                                                                                                                                                                                                                                                                                                                                                                                                                                                                                                                                                                                                                         | <p>spD3-product-T5.out Energy: -1296438.7071709</p> <p>O -1.93490 2.62612 -1.57846<br/>         C -5.36560 -3.61434 0.32418<br/>         O -4.28140 -3.30066 -0.14707<br/>         O -6.32818 -2.75928 0.63707<br/>         C -6.13663 0.97751 0.33280<br/>         C -5.26131 1.96258 -0.05646<br/>         N -5.52223 -0.24921 0.17137<br/>         C -4.30826 0.00034 -0.30193<br/>         N -4.10625 1.32704 -0.45628<br/>         C -5.75582 -5.05005 0.62496<br/>         C -7.53231 1.10191 0.85890<br/>         C -0.32263 -0.52071 -2.70465<br/>         C 0.51158 -1.86134 -0.83184<br/>         O 1.41666 -2.31508 -0.15277<br/>         C -2.08209 3.81808 -2.32470<br/>         C 0.66350 -0.75171 -1.81694<br/>         C 1.94200 0.07680 -1.70674<br/>         C 3.21154 -0.71267 -2.02046<br/>         O 2.04216 0.69730 -0.43920<br/>         C 4.38127 -0.50009 -1.28424<br/>         C 3.25107 -1.60048 -3.10349<br/>         C 5.56070 -1.17089 -1.61429<br/>         C 4.42897 -2.26872 -3.43759<br/>         C 5.59081 -2.05809 -2.69182<br/>         O -0.75057 -2.34346 -0.75978<br/>         C -0.95139 -3.45992 0.12483<br/>         C -0.40843 0.54663 -3.75243</p> |  |

|   |          |          |          |
|---|----------|----------|----------|
| C | 4.22271  | -1.53906 | 2.68449  |
| O | 5.34507  | -1.68112 | 3.17254  |
| C | 3.38705  | -0.30862 | 3.06306  |
| N | 2.11844  | -0.13635 | 2.38742  |
| C | 0.94166  | -0.09737 | 3.08775  |
| O | 0.87411  | -0.30747 | 4.29749  |
| C | -0.29290 | 0.20447  | 2.24901  |
| N | 3.64624  | -2.41388 | 1.82588  |
| C | 4.34528  | -3.57901 | 1.32585  |
| H | 4.43751  | -2.95805 | -4.27918 |
| H | 6.50947  | -2.58107 | -2.94739 |
| H | 6.45687  | -1.00039 | -1.02259 |
| H | 4.35374  | 0.19172  | -0.45070 |
| H | 2.34822  | -1.77775 | -3.68302 |
| H | -0.80372 | 0.13413  | -4.68936 |
| H | 0.54404  | 1.03680  | -3.96629 |
| H | -1.11374 | 1.31010  | -3.39735 |
| H | -3.09430 | 3.83793  | -2.74719 |
| H | 1.87268  | 0.86816  | -2.46594 |
| H | -1.36589 | 3.86847  | -3.15949 |
| H | -1.94305 | 4.71596  | -1.70668 |
| H | -1.20011 | -1.15992 | -2.63863 |
| H | -8.25135 | 0.57429  | 0.21940  |
| H | -7.62073 | 0.67309  | 1.86494  |
| H | -7.83565 | 2.15274  | 0.91278  |
| H | -0.11936 | 0.99477  | 1.51076  |
| H | -1.10112 | 0.49724  | 2.92204  |
| H | -0.60774 | -0.69460 | 1.70568  |
| H | 2.11230  | 0.11998  | 1.39760  |
| H | 3.17373  | -0.37293 | 4.13361  |
| H | 4.03625  | 0.56303  | 2.91020  |
| H | 2.75923  | -2.17442 | 1.39683  |
| H | 3.73431  | -4.48120 | 1.45204  |
| H | 4.58824  | -3.46785 | 0.26194  |
| H | -4.97960 | -5.73032 | 0.27094  |
| H | -2.01452 | -3.68857 | 0.05851  |
| H | -0.33741 | -4.30855 | -0.19247 |
| H | -5.89031 | -5.17681 | 1.70509  |
| H | -0.67324 | -3.18882 | 1.14701  |
| H | -6.71217 | -5.28974 | 0.14858  |
| H | 5.26924  | -3.68352 | 1.89783  |
| O | 0.36125  | 2.66686  | -0.40162 |
| H | -3.25621 | 1.79484  | -0.82809 |
| H | -5.35598 | 3.03816  | -0.07692 |
| H | -3.56967 | -0.75631 | -0.52721 |
| H | -6.01565 | -1.79373 | 0.45077  |
| H | -1.03665 | 2.64478  | -1.08342 |
| H | 1.40032  | 1.49066  | -0.43008 |
| C | 0.76837  | 3.82018  | 0.10212  |
| C | 1.64027  | 6.31851  | 1.16275  |
| C | 2.14499  | 4.15586  | 0.17357  |
| C | -0.15221 | 4.77919  | 0.59887  |
| C | 0.27986  | 6.00021  | 1.11123  |
| C | 2.56329  | 5.37784  | 0.69277  |
| H | 2.86748  | 3.42689  | -0.18554 |
| H | -1.21033 | 4.52701  | 0.58660  |

|  |   |          |         |         |
|--|---|----------|---------|---------|
|  | H | -0.45702 | 6.71059 | 1.48463 |
|  | H | 3.62895  | 5.60049 | 0.73150 |
|  | H | 1.97383  | 7.27134 | 1.56655 |

Optimized Molecular Properties for **T6-complex**

|                                                |                                                                                                                                                                                                                                                                                                                                                                                                                                                                                                                                                                                                                                                                                                                                                                                                                                                                                                                                                                                                                                                                                                                                                                                                                                                                                                                                                                                                                                                                                                                                                                                                                                                                                                                                                                                                                                                                                                                                                                                       |          |          |          |          |   |          |         |          |   |          |         |          |   |          |         |          |   |          |         |          |   |          |         |          |   |          |         |          |   |          |          |          |   |          |         |          |   |          |         |          |   |          |         |          |   |          |         |         |   |          |         |          |   |          |          |          |   |         |          |         |   |         |          |         |   |          |          |         |   |          |          |         |   |          |          |         |   |          |          |         |   |          |          |          |   |         |          |          |   |          |          |         |   |         |          |         |   |          |          |         |   |         |          |         |
|------------------------------------------------|---------------------------------------------------------------------------------------------------------------------------------------------------------------------------------------------------------------------------------------------------------------------------------------------------------------------------------------------------------------------------------------------------------------------------------------------------------------------------------------------------------------------------------------------------------------------------------------------------------------------------------------------------------------------------------------------------------------------------------------------------------------------------------------------------------------------------------------------------------------------------------------------------------------------------------------------------------------------------------------------------------------------------------------------------------------------------------------------------------------------------------------------------------------------------------------------------------------------------------------------------------------------------------------------------------------------------------------------------------------------------------------------------------------------------------------------------------------------------------------------------------------------------------------------------------------------------------------------------------------------------------------------------------------------------------------------------------------------------------------------------------------------------------------------------------------------------------------------------------------------------------------------------------------------------------------------------------------------------------------|----------|----------|----------|----------|---|----------|---------|----------|---|----------|---------|----------|---|----------|---------|----------|---|----------|---------|----------|---|----------|---------|----------|---|----------|---------|----------|---|----------|----------|----------|---|----------|---------|----------|---|----------|---------|----------|---|----------|---------|----------|---|----------|---------|---------|---|----------|---------|----------|---|----------|----------|----------|---|---------|----------|---------|---|---------|----------|---------|---|----------|----------|---------|---|----------|----------|---------|---|----------|----------|---------|---|----------|----------|---------|---|----------|----------|----------|---|---------|----------|----------|---|----------|----------|---------|---|---------|----------|---------|---|----------|----------|---------|---|---------|----------|---------|
| Number of<br>(-)<br>Vibrational<br>Frequencies | 0                                                                                                                                                                                                                                                                                                                                                                                                                                                                                                                                                                                                                                                                                                                                                                                                                                                                                                                                                                                                                                                                                                                                                                                                                                                                                                                                                                                                                                                                                                                                                                                                                                                                                                                                                                                                                                                                                                                                                                                     |          |          |          |          |   |          |         |          |   |          |         |          |   |          |         |          |   |          |         |          |   |          |         |          |   |          |         |          |   |          |          |          |   |          |         |          |   |          |         |          |   |          |         |          |   |          |         |         |   |          |         |          |   |          |          |          |   |         |          |         |   |         |          |         |   |          |          |         |   |          |          |         |   |          |          |         |   |          |          |         |   |          |          |          |   |         |          |          |   |          |          |         |   |         |          |         |   |          |          |         |   |         |          |         |
| Absolute<br>Energies<br>(Hartrees)             | <p><b>B3LYP/6-31G(d) (PCM)</b></p> <p>There are 19 positive frequencies below 100 cm<sup>-1</sup>.</p> <p>Zero-point correction: 0.438160 hartree<br/>         Enthalpy correction: 0.471971 hartree<br/>         Free Energy correction: 0.366132 hartree<br/>         Quasiharmonic Free Energy correction: 0.381707 hartree</p> <p>SCF Energy: -1183.626992 hartree<br/>         SCF Energy + ZPVE: -1183.188832 hartree<br/>         Enthalpy: -1183.155021 hartree<br/>         Free Energy: -1183.260860 hartree</p> <p>Free Energy with quasiharmonic correction: -1183.245285 hartree<br/>         (correction: 9.77 kcal/mol)</p> <p><b>B3LYP-D3/6-311+G(d,p) (PCM)</b></p> <p>SCF Done: E(RB3LYP) = -1184.04635895 A.U.</p>                                                                                                                                                                                                                                                                                                                                                                                                                                                                                                                                                                                                                                                                                                                                                                                                                                                                                                                                                                                                                                                                                                                                                                                                                                                 |          |          |          |          |   |          |         |          |   |          |         |          |   |          |         |          |   |          |         |          |   |          |         |          |   |          |         |          |   |          |          |          |   |          |         |          |   |          |         |          |   |          |         |          |   |          |         |         |   |          |         |          |   |          |          |          |   |         |          |         |   |         |          |         |   |          |          |         |   |          |          |         |   |          |          |         |   |          |          |         |   |          |          |          |   |         |          |          |   |          |          |         |   |         |          |         |   |          |          |         |   |         |          |         |
| Cartesian<br>Coordinates                       | <p>(PCM)</p> <p>52</p> <p>spD3-complex-T6.out Energy: -743000.3019761</p> <table> <tr><td>O</td><td>-4.22035</td><td>-1.84287</td><td>-0.17202</td></tr> <tr><td>C</td><td>-2.55084</td><td>2.98013</td><td>-0.26345</td></tr> <tr><td>C</td><td>-2.25693</td><td>1.63652</td><td>-0.26435</td></tr> <tr><td>N</td><td>-3.93449</td><td>3.02645</td><td>-0.25656</td></tr> <tr><td>C</td><td>-4.40483</td><td>1.75002</td><td>-0.25331</td></tr> <tr><td>N</td><td>-3.41369</td><td>0.87982</td><td>-0.25772</td></tr> <tr><td>H</td><td>-1.27971</td><td>1.17350</td><td>-0.27606</td></tr> <tr><td>H</td><td>-3.84964</td><td>-0.93054</td><td>-0.25376</td></tr> <tr><td>H</td><td>-5.45931</td><td>1.51209</td><td>-0.24767</td></tr> <tr><td>C</td><td>-1.69494</td><td>4.20431</td><td>-0.27724</td></tr> <tr><td>H</td><td>-1.82739</td><td>4.77947</td><td>-1.20276</td></tr> <tr><td>H</td><td>-1.93474</td><td>4.87150</td><td>0.56038</td></tr> <tr><td>H</td><td>-0.63967</td><td>3.92916</td><td>-0.19628</td></tr> <tr><td>C</td><td>-1.37852</td><td>-3.10203</td><td>-1.24206</td></tr> <tr><td>C</td><td>0.48502</td><td>-2.33338</td><td>0.21439</td></tr> <tr><td>O</td><td>1.52972</td><td>-1.69929</td><td>0.36186</td></tr> <tr><td>C</td><td>-4.11309</td><td>-2.21212</td><td>1.18918</td></tr> <tr><td>H</td><td>-4.59096</td><td>-3.19048</td><td>1.31179</td></tr> <tr><td>H</td><td>-3.06717</td><td>-2.30343</td><td>1.52476</td></tr> <tr><td>H</td><td>-4.62231</td><td>-1.50242</td><td>1.86093</td></tr> <tr><td>C</td><td>-0.23172</td><td>-2.42644</td><td>-1.06349</td></tr> <tr><td>H</td><td>0.23793</td><td>-1.88301</td><td>-1.87898</td></tr> <tr><td>O</td><td>-0.09317</td><td>-2.99978</td><td>1.22717</td></tr> <tr><td>C</td><td>0.57767</td><td>-2.93838</td><td>2.49955</td></tr> <tr><td>H</td><td>-0.01760</td><td>-3.55777</td><td>3.16955</td></tr> <tr><td>H</td><td>0.61316</td><td>-1.90835</td><td>2.86356</td></tr> </table> | O        | -4.22035 | -1.84287 | -0.17202 | C | -2.55084 | 2.98013 | -0.26345 | C | -2.25693 | 1.63652 | -0.26435 | N | -3.93449 | 3.02645 | -0.25656 | C | -4.40483 | 1.75002 | -0.25331 | N | -3.41369 | 0.87982 | -0.25772 | H | -1.27971 | 1.17350 | -0.27606 | H | -3.84964 | -0.93054 | -0.25376 | H | -5.45931 | 1.51209 | -0.24767 | C | -1.69494 | 4.20431 | -0.27724 | H | -1.82739 | 4.77947 | -1.20276 | H | -1.93474 | 4.87150 | 0.56038 | H | -0.63967 | 3.92916 | -0.19628 | C | -1.37852 | -3.10203 | -1.24206 | C | 0.48502 | -2.33338 | 0.21439 | O | 1.52972 | -1.69929 | 0.36186 | C | -4.11309 | -2.21212 | 1.18918 | H | -4.59096 | -3.19048 | 1.31179 | H | -3.06717 | -2.30343 | 1.52476 | H | -4.62231 | -1.50242 | 1.86093 | C | -0.23172 | -2.42644 | -1.06349 | H | 0.23793 | -1.88301 | -1.87898 | O | -0.09317 | -2.99978 | 1.22717 | C | 0.57767 | -2.93838 | 2.49955 | H | -0.01760 | -3.55777 | 3.16955 | H | 0.61316 | -1.90835 | 2.86356 |
| O                                              | -4.22035                                                                                                                                                                                                                                                                                                                                                                                                                                                                                                                                                                                                                                                                                                                                                                                                                                                                                                                                                                                                                                                                                                                                                                                                                                                                                                                                                                                                                                                                                                                                                                                                                                                                                                                                                                                                                                                                                                                                                                              | -1.84287 | -0.17202 |          |          |   |          |         |          |   |          |         |          |   |          |         |          |   |          |         |          |   |          |         |          |   |          |         |          |   |          |          |          |   |          |         |          |   |          |         |          |   |          |         |          |   |          |         |         |   |          |         |          |   |          |          |          |   |         |          |         |   |         |          |         |   |          |          |         |   |          |          |         |   |          |          |         |   |          |          |         |   |          |          |          |   |         |          |          |   |          |          |         |   |         |          |         |   |          |          |         |   |         |          |         |
| C                                              | -2.55084                                                                                                                                                                                                                                                                                                                                                                                                                                                                                                                                                                                                                                                                                                                                                                                                                                                                                                                                                                                                                                                                                                                                                                                                                                                                                                                                                                                                                                                                                                                                                                                                                                                                                                                                                                                                                                                                                                                                                                              | 2.98013  | -0.26345 |          |          |   |          |         |          |   |          |         |          |   |          |         |          |   |          |         |          |   |          |         |          |   |          |         |          |   |          |          |          |   |          |         |          |   |          |         |          |   |          |         |          |   |          |         |         |   |          |         |          |   |          |          |          |   |         |          |         |   |         |          |         |   |          |          |         |   |          |          |         |   |          |          |         |   |          |          |         |   |          |          |          |   |         |          |          |   |          |          |         |   |         |          |         |   |          |          |         |   |         |          |         |
| C                                              | -2.25693                                                                                                                                                                                                                                                                                                                                                                                                                                                                                                                                                                                                                                                                                                                                                                                                                                                                                                                                                                                                                                                                                                                                                                                                                                                                                                                                                                                                                                                                                                                                                                                                                                                                                                                                                                                                                                                                                                                                                                              | 1.63652  | -0.26435 |          |          |   |          |         |          |   |          |         |          |   |          |         |          |   |          |         |          |   |          |         |          |   |          |         |          |   |          |          |          |   |          |         |          |   |          |         |          |   |          |         |          |   |          |         |         |   |          |         |          |   |          |          |          |   |         |          |         |   |         |          |         |   |          |          |         |   |          |          |         |   |          |          |         |   |          |          |         |   |          |          |          |   |         |          |          |   |          |          |         |   |         |          |         |   |          |          |         |   |         |          |         |
| N                                              | -3.93449                                                                                                                                                                                                                                                                                                                                                                                                                                                                                                                                                                                                                                                                                                                                                                                                                                                                                                                                                                                                                                                                                                                                                                                                                                                                                                                                                                                                                                                                                                                                                                                                                                                                                                                                                                                                                                                                                                                                                                              | 3.02645  | -0.25656 |          |          |   |          |         |          |   |          |         |          |   |          |         |          |   |          |         |          |   |          |         |          |   |          |         |          |   |          |          |          |   |          |         |          |   |          |         |          |   |          |         |          |   |          |         |         |   |          |         |          |   |          |          |          |   |         |          |         |   |         |          |         |   |          |          |         |   |          |          |         |   |          |          |         |   |          |          |         |   |          |          |          |   |         |          |          |   |          |          |         |   |         |          |         |   |          |          |         |   |         |          |         |
| C                                              | -4.40483                                                                                                                                                                                                                                                                                                                                                                                                                                                                                                                                                                                                                                                                                                                                                                                                                                                                                                                                                                                                                                                                                                                                                                                                                                                                                                                                                                                                                                                                                                                                                                                                                                                                                                                                                                                                                                                                                                                                                                              | 1.75002  | -0.25331 |          |          |   |          |         |          |   |          |         |          |   |          |         |          |   |          |         |          |   |          |         |          |   |          |         |          |   |          |          |          |   |          |         |          |   |          |         |          |   |          |         |          |   |          |         |         |   |          |         |          |   |          |          |          |   |         |          |         |   |         |          |         |   |          |          |         |   |          |          |         |   |          |          |         |   |          |          |         |   |          |          |          |   |         |          |          |   |          |          |         |   |         |          |         |   |          |          |         |   |         |          |         |
| N                                              | -3.41369                                                                                                                                                                                                                                                                                                                                                                                                                                                                                                                                                                                                                                                                                                                                                                                                                                                                                                                                                                                                                                                                                                                                                                                                                                                                                                                                                                                                                                                                                                                                                                                                                                                                                                                                                                                                                                                                                                                                                                              | 0.87982  | -0.25772 |          |          |   |          |         |          |   |          |         |          |   |          |         |          |   |          |         |          |   |          |         |          |   |          |         |          |   |          |          |          |   |          |         |          |   |          |         |          |   |          |         |          |   |          |         |         |   |          |         |          |   |          |          |          |   |         |          |         |   |         |          |         |   |          |          |         |   |          |          |         |   |          |          |         |   |          |          |         |   |          |          |          |   |         |          |          |   |          |          |         |   |         |          |         |   |          |          |         |   |         |          |         |
| H                                              | -1.27971                                                                                                                                                                                                                                                                                                                                                                                                                                                                                                                                                                                                                                                                                                                                                                                                                                                                                                                                                                                                                                                                                                                                                                                                                                                                                                                                                                                                                                                                                                                                                                                                                                                                                                                                                                                                                                                                                                                                                                              | 1.17350  | -0.27606 |          |          |   |          |         |          |   |          |         |          |   |          |         |          |   |          |         |          |   |          |         |          |   |          |         |          |   |          |          |          |   |          |         |          |   |          |         |          |   |          |         |          |   |          |         |         |   |          |         |          |   |          |          |          |   |         |          |         |   |         |          |         |   |          |          |         |   |          |          |         |   |          |          |         |   |          |          |         |   |          |          |          |   |         |          |          |   |          |          |         |   |         |          |         |   |          |          |         |   |         |          |         |
| H                                              | -3.84964                                                                                                                                                                                                                                                                                                                                                                                                                                                                                                                                                                                                                                                                                                                                                                                                                                                                                                                                                                                                                                                                                                                                                                                                                                                                                                                                                                                                                                                                                                                                                                                                                                                                                                                                                                                                                                                                                                                                                                              | -0.93054 | -0.25376 |          |          |   |          |         |          |   |          |         |          |   |          |         |          |   |          |         |          |   |          |         |          |   |          |         |          |   |          |          |          |   |          |         |          |   |          |         |          |   |          |         |          |   |          |         |         |   |          |         |          |   |          |          |          |   |         |          |         |   |         |          |         |   |          |          |         |   |          |          |         |   |          |          |         |   |          |          |         |   |          |          |          |   |         |          |          |   |          |          |         |   |         |          |         |   |          |          |         |   |         |          |         |
| H                                              | -5.45931                                                                                                                                                                                                                                                                                                                                                                                                                                                                                                                                                                                                                                                                                                                                                                                                                                                                                                                                                                                                                                                                                                                                                                                                                                                                                                                                                                                                                                                                                                                                                                                                                                                                                                                                                                                                                                                                                                                                                                              | 1.51209  | -0.24767 |          |          |   |          |         |          |   |          |         |          |   |          |         |          |   |          |         |          |   |          |         |          |   |          |         |          |   |          |          |          |   |          |         |          |   |          |         |          |   |          |         |          |   |          |         |         |   |          |         |          |   |          |          |          |   |         |          |         |   |         |          |         |   |          |          |         |   |          |          |         |   |          |          |         |   |          |          |         |   |          |          |          |   |         |          |          |   |          |          |         |   |         |          |         |   |          |          |         |   |         |          |         |
| C                                              | -1.69494                                                                                                                                                                                                                                                                                                                                                                                                                                                                                                                                                                                                                                                                                                                                                                                                                                                                                                                                                                                                                                                                                                                                                                                                                                                                                                                                                                                                                                                                                                                                                                                                                                                                                                                                                                                                                                                                                                                                                                              | 4.20431  | -0.27724 |          |          |   |          |         |          |   |          |         |          |   |          |         |          |   |          |         |          |   |          |         |          |   |          |         |          |   |          |          |          |   |          |         |          |   |          |         |          |   |          |         |          |   |          |         |         |   |          |         |          |   |          |          |          |   |         |          |         |   |         |          |         |   |          |          |         |   |          |          |         |   |          |          |         |   |          |          |         |   |          |          |          |   |         |          |          |   |          |          |         |   |         |          |         |   |          |          |         |   |         |          |         |
| H                                              | -1.82739                                                                                                                                                                                                                                                                                                                                                                                                                                                                                                                                                                                                                                                                                                                                                                                                                                                                                                                                                                                                                                                                                                                                                                                                                                                                                                                                                                                                                                                                                                                                                                                                                                                                                                                                                                                                                                                                                                                                                                              | 4.77947  | -1.20276 |          |          |   |          |         |          |   |          |         |          |   |          |         |          |   |          |         |          |   |          |         |          |   |          |         |          |   |          |          |          |   |          |         |          |   |          |         |          |   |          |         |          |   |          |         |         |   |          |         |          |   |          |          |          |   |         |          |         |   |         |          |         |   |          |          |         |   |          |          |         |   |          |          |         |   |          |          |         |   |          |          |          |   |         |          |          |   |          |          |         |   |         |          |         |   |          |          |         |   |         |          |         |
| H                                              | -1.93474                                                                                                                                                                                                                                                                                                                                                                                                                                                                                                                                                                                                                                                                                                                                                                                                                                                                                                                                                                                                                                                                                                                                                                                                                                                                                                                                                                                                                                                                                                                                                                                                                                                                                                                                                                                                                                                                                                                                                                              | 4.87150  | 0.56038  |          |          |   |          |         |          |   |          |         |          |   |          |         |          |   |          |         |          |   |          |         |          |   |          |         |          |   |          |          |          |   |          |         |          |   |          |         |          |   |          |         |          |   |          |         |         |   |          |         |          |   |          |          |          |   |         |          |         |   |         |          |         |   |          |          |         |   |          |          |         |   |          |          |         |   |          |          |         |   |          |          |          |   |         |          |          |   |          |          |         |   |         |          |         |   |          |          |         |   |         |          |         |
| H                                              | -0.63967                                                                                                                                                                                                                                                                                                                                                                                                                                                                                                                                                                                                                                                                                                                                                                                                                                                                                                                                                                                                                                                                                                                                                                                                                                                                                                                                                                                                                                                                                                                                                                                                                                                                                                                                                                                                                                                                                                                                                                              | 3.92916  | -0.19628 |          |          |   |          |         |          |   |          |         |          |   |          |         |          |   |          |         |          |   |          |         |          |   |          |         |          |   |          |          |          |   |          |         |          |   |          |         |          |   |          |         |          |   |          |         |         |   |          |         |          |   |          |          |          |   |         |          |         |   |         |          |         |   |          |          |         |   |          |          |         |   |          |          |         |   |          |          |         |   |          |          |          |   |         |          |          |   |          |          |         |   |         |          |         |   |          |          |         |   |         |          |         |
| C                                              | -1.37852                                                                                                                                                                                                                                                                                                                                                                                                                                                                                                                                                                                                                                                                                                                                                                                                                                                                                                                                                                                                                                                                                                                                                                                                                                                                                                                                                                                                                                                                                                                                                                                                                                                                                                                                                                                                                                                                                                                                                                              | -3.10203 | -1.24206 |          |          |   |          |         |          |   |          |         |          |   |          |         |          |   |          |         |          |   |          |         |          |   |          |         |          |   |          |          |          |   |          |         |          |   |          |         |          |   |          |         |          |   |          |         |         |   |          |         |          |   |          |          |          |   |         |          |         |   |         |          |         |   |          |          |         |   |          |          |         |   |          |          |         |   |          |          |         |   |          |          |          |   |         |          |          |   |          |          |         |   |         |          |         |   |          |          |         |   |         |          |         |
| C                                              | 0.48502                                                                                                                                                                                                                                                                                                                                                                                                                                                                                                                                                                                                                                                                                                                                                                                                                                                                                                                                                                                                                                                                                                                                                                                                                                                                                                                                                                                                                                                                                                                                                                                                                                                                                                                                                                                                                                                                                                                                                                               | -2.33338 | 0.21439  |          |          |   |          |         |          |   |          |         |          |   |          |         |          |   |          |         |          |   |          |         |          |   |          |         |          |   |          |          |          |   |          |         |          |   |          |         |          |   |          |         |          |   |          |         |         |   |          |         |          |   |          |          |          |   |         |          |         |   |         |          |         |   |          |          |         |   |          |          |         |   |          |          |         |   |          |          |         |   |          |          |          |   |         |          |          |   |          |          |         |   |         |          |         |   |          |          |         |   |         |          |         |
| O                                              | 1.52972                                                                                                                                                                                                                                                                                                                                                                                                                                                                                                                                                                                                                                                                                                                                                                                                                                                                                                                                                                                                                                                                                                                                                                                                                                                                                                                                                                                                                                                                                                                                                                                                                                                                                                                                                                                                                                                                                                                                                                               | -1.69929 | 0.36186  |          |          |   |          |         |          |   |          |         |          |   |          |         |          |   |          |         |          |   |          |         |          |   |          |         |          |   |          |          |          |   |          |         |          |   |          |         |          |   |          |         |          |   |          |         |         |   |          |         |          |   |          |          |          |   |         |          |         |   |         |          |         |   |          |          |         |   |          |          |         |   |          |          |         |   |          |          |         |   |          |          |          |   |         |          |          |   |          |          |         |   |         |          |         |   |          |          |         |   |         |          |         |
| C                                              | -4.11309                                                                                                                                                                                                                                                                                                                                                                                                                                                                                                                                                                                                                                                                                                                                                                                                                                                                                                                                                                                                                                                                                                                                                                                                                                                                                                                                                                                                                                                                                                                                                                                                                                                                                                                                                                                                                                                                                                                                                                              | -2.21212 | 1.18918  |          |          |   |          |         |          |   |          |         |          |   |          |         |          |   |          |         |          |   |          |         |          |   |          |         |          |   |          |          |          |   |          |         |          |   |          |         |          |   |          |         |          |   |          |         |         |   |          |         |          |   |          |          |          |   |         |          |         |   |         |          |         |   |          |          |         |   |          |          |         |   |          |          |         |   |          |          |         |   |          |          |          |   |         |          |          |   |          |          |         |   |         |          |         |   |          |          |         |   |         |          |         |
| H                                              | -4.59096                                                                                                                                                                                                                                                                                                                                                                                                                                                                                                                                                                                                                                                                                                                                                                                                                                                                                                                                                                                                                                                                                                                                                                                                                                                                                                                                                                                                                                                                                                                                                                                                                                                                                                                                                                                                                                                                                                                                                                              | -3.19048 | 1.31179  |          |          |   |          |         |          |   |          |         |          |   |          |         |          |   |          |         |          |   |          |         |          |   |          |         |          |   |          |          |          |   |          |         |          |   |          |         |          |   |          |         |          |   |          |         |         |   |          |         |          |   |          |          |          |   |         |          |         |   |         |          |         |   |          |          |         |   |          |          |         |   |          |          |         |   |          |          |         |   |          |          |          |   |         |          |          |   |          |          |         |   |         |          |         |   |          |          |         |   |         |          |         |
| H                                              | -3.06717                                                                                                                                                                                                                                                                                                                                                                                                                                                                                                                                                                                                                                                                                                                                                                                                                                                                                                                                                                                                                                                                                                                                                                                                                                                                                                                                                                                                                                                                                                                                                                                                                                                                                                                                                                                                                                                                                                                                                                              | -2.30343 | 1.52476  |          |          |   |          |         |          |   |          |         |          |   |          |         |          |   |          |         |          |   |          |         |          |   |          |         |          |   |          |          |          |   |          |         |          |   |          |         |          |   |          |         |          |   |          |         |         |   |          |         |          |   |          |          |          |   |         |          |         |   |         |          |         |   |          |          |         |   |          |          |         |   |          |          |         |   |          |          |         |   |          |          |          |   |         |          |          |   |          |          |         |   |         |          |         |   |          |          |         |   |         |          |         |
| H                                              | -4.62231                                                                                                                                                                                                                                                                                                                                                                                                                                                                                                                                                                                                                                                                                                                                                                                                                                                                                                                                                                                                                                                                                                                                                                                                                                                                                                                                                                                                                                                                                                                                                                                                                                                                                                                                                                                                                                                                                                                                                                              | -1.50242 | 1.86093  |          |          |   |          |         |          |   |          |         |          |   |          |         |          |   |          |         |          |   |          |         |          |   |          |         |          |   |          |          |          |   |          |         |          |   |          |         |          |   |          |         |          |   |          |         |         |   |          |         |          |   |          |          |          |   |         |          |         |   |         |          |         |   |          |          |         |   |          |          |         |   |          |          |         |   |          |          |         |   |          |          |          |   |         |          |          |   |          |          |         |   |         |          |         |   |          |          |         |   |         |          |         |
| C                                              | -0.23172                                                                                                                                                                                                                                                                                                                                                                                                                                                                                                                                                                                                                                                                                                                                                                                                                                                                                                                                                                                                                                                                                                                                                                                                                                                                                                                                                                                                                                                                                                                                                                                                                                                                                                                                                                                                                                                                                                                                                                              | -2.42644 | -1.06349 |          |          |   |          |         |          |   |          |         |          |   |          |         |          |   |          |         |          |   |          |         |          |   |          |         |          |   |          |          |          |   |          |         |          |   |          |         |          |   |          |         |          |   |          |         |         |   |          |         |          |   |          |          |          |   |         |          |         |   |         |          |         |   |          |          |         |   |          |          |         |   |          |          |         |   |          |          |         |   |          |          |          |   |         |          |          |   |          |          |         |   |         |          |         |   |          |          |         |   |         |          |         |
| H                                              | 0.23793                                                                                                                                                                                                                                                                                                                                                                                                                                                                                                                                                                                                                                                                                                                                                                                                                                                                                                                                                                                                                                                                                                                                                                                                                                                                                                                                                                                                                                                                                                                                                                                                                                                                                                                                                                                                                                                                                                                                                                               | -1.88301 | -1.87898 |          |          |   |          |         |          |   |          |         |          |   |          |         |          |   |          |         |          |   |          |         |          |   |          |         |          |   |          |          |          |   |          |         |          |   |          |         |          |   |          |         |          |   |          |         |         |   |          |         |          |   |          |          |          |   |         |          |         |   |         |          |         |   |          |          |         |   |          |          |         |   |          |          |         |   |          |          |         |   |          |          |          |   |         |          |          |   |          |          |         |   |         |          |         |   |          |          |         |   |         |          |         |
| O                                              | -0.09317                                                                                                                                                                                                                                                                                                                                                                                                                                                                                                                                                                                                                                                                                                                                                                                                                                                                                                                                                                                                                                                                                                                                                                                                                                                                                                                                                                                                                                                                                                                                                                                                                                                                                                                                                                                                                                                                                                                                                                              | -2.99978 | 1.22717  |          |          |   |          |         |          |   |          |         |          |   |          |         |          |   |          |         |          |   |          |         |          |   |          |         |          |   |          |          |          |   |          |         |          |   |          |         |          |   |          |         |          |   |          |         |         |   |          |         |          |   |          |          |          |   |         |          |         |   |         |          |         |   |          |          |         |   |          |          |         |   |          |          |         |   |          |          |         |   |          |          |          |   |         |          |          |   |          |          |         |   |         |          |         |   |          |          |         |   |         |          |         |
| C                                              | 0.57767                                                                                                                                                                                                                                                                                                                                                                                                                                                                                                                                                                                                                                                                                                                                                                                                                                                                                                                                                                                                                                                                                                                                                                                                                                                                                                                                                                                                                                                                                                                                                                                                                                                                                                                                                                                                                                                                                                                                                                               | -2.93838 | 2.49955  |          |          |   |          |         |          |   |          |         |          |   |          |         |          |   |          |         |          |   |          |         |          |   |          |         |          |   |          |          |          |   |          |         |          |   |          |         |          |   |          |         |          |   |          |         |         |   |          |         |          |   |          |          |          |   |         |          |         |   |         |          |         |   |          |          |         |   |          |          |         |   |          |          |         |   |          |          |         |   |          |          |          |   |         |          |          |   |          |          |         |   |         |          |         |   |          |          |         |   |         |          |         |
| H                                              | -0.01760                                                                                                                                                                                                                                                                                                                                                                                                                                                                                                                                                                                                                                                                                                                                                                                                                                                                                                                                                                                                                                                                                                                                                                                                                                                                                                                                                                                                                                                                                                                                                                                                                                                                                                                                                                                                                                                                                                                                                                              | -3.55777 | 3.16955  |          |          |   |          |         |          |   |          |         |          |   |          |         |          |   |          |         |          |   |          |         |          |   |          |         |          |   |          |          |          |   |          |         |          |   |          |         |          |   |          |         |          |   |          |         |         |   |          |         |          |   |          |          |          |   |         |          |         |   |         |          |         |   |          |          |         |   |          |          |         |   |          |          |         |   |          |          |         |   |          |          |          |   |         |          |          |   |          |          |         |   |         |          |         |   |          |          |         |   |         |          |         |
| H                                              | 0.61316                                                                                                                                                                                                                                                                                                                                                                                                                                                                                                                                                                                                                                                                                                                                                                                                                                                                                                                                                                                                                                                                                                                                                                                                                                                                                                                                                                                                                                                                                                                                                                                                                                                                                                                                                                                                                                                                                                                                                                               | -1.90835 | 2.86356  |          |          |   |          |         |          |   |          |         |          |   |          |         |          |   |          |         |          |   |          |         |          |   |          |         |          |   |          |          |          |   |          |         |          |   |          |         |          |   |          |         |          |   |          |         |         |   |          |         |          |   |          |          |          |   |         |          |         |   |         |          |         |   |          |          |         |   |          |          |         |   |          |          |         |   |          |          |         |   |          |          |          |   |         |          |          |   |          |          |         |   |         |          |         |   |          |          |         |   |         |          |         |

|   |          |          |          |
|---|----------|----------|----------|
| H | 1.59417  | -3.32971 | 2.41575  |
| C | -2.13455 | -3.18451 | -2.52577 |
| H | -1.81072 | -3.62740 | -0.39421 |
| H | -2.24123 | -4.23043 | -2.84325 |
| H | -3.14691 | -2.79751 | -2.35986 |
| H | -1.65358 | -2.61979 | -3.32996 |
| C | 2.07924  | 2.15706  | 0.12532  |
| O | 1.68531  | 3.32331  | 0.03431  |
| C | 2.94497  | 1.56712  | -0.99673 |
| N | 3.41230  | 0.20997  | -0.80955 |
| H | 2.72949  | -0.54022 | -0.74582 |
| H | 3.82621  | 2.20458  | -1.10021 |
| H | 2.36544  | 1.65698  | -1.92358 |
| N | 1.79268  | 1.35091  | 1.17150  |
| H | 2.06602  | 0.37738  | 1.12921  |
| C | 0.96312  | 1.79450  | 2.28029  |
| H | -0.10684 | 1.70871  | 2.05162  |
| H | 1.18781  | 1.18788  | 3.16093  |
| H | 1.18413  | 2.84174  | 2.49643  |
| C | 4.73367  | -0.08701 | -0.62570 |
| O | 5.62142  | 0.76470  | -0.64218 |
| C | 5.03864  | -1.56329 | -0.42808 |
| H | 5.49930  | -1.95895 | -1.34039 |
| H | 5.76869  | -1.66660 | 0.37928  |
| H | 4.15028  | -2.15625 | -0.19501 |
| H | -4.49743 | 3.86632  | -0.25459 |

Optimized Molecular Properties for **T6-TS1**

|                                                |                                                                                                                                                                                                                                                                                                                                                                                                                                                                                                                                                                                                                                                                                                                                                                                                                                                                                                                                                                                                                                                                                                                                                                                                                                                                                                                                                                                                                                                                                                                                                                                                                                                                                                                                                                                                                                                                                                                                                            |          |          |         |          |   |         |          |          |   |         |          |         |   |         |          |          |   |         |          |          |   |         |          |          |   |         |          |         |   |         |         |          |   |         |          |          |   |         |          |         |   |         |          |          |   |         |          |         |   |         |          |         |   |         |         |          |   |          |         |         |   |          |         |         |   |         |         |         |   |         |         |         |   |         |         |         |   |         |         |         |   |         |         |          |   |         |         |          |   |          |         |         |   |          |         |         |   |          |         |         |   |          |         |         |
|------------------------------------------------|------------------------------------------------------------------------------------------------------------------------------------------------------------------------------------------------------------------------------------------------------------------------------------------------------------------------------------------------------------------------------------------------------------------------------------------------------------------------------------------------------------------------------------------------------------------------------------------------------------------------------------------------------------------------------------------------------------------------------------------------------------------------------------------------------------------------------------------------------------------------------------------------------------------------------------------------------------------------------------------------------------------------------------------------------------------------------------------------------------------------------------------------------------------------------------------------------------------------------------------------------------------------------------------------------------------------------------------------------------------------------------------------------------------------------------------------------------------------------------------------------------------------------------------------------------------------------------------------------------------------------------------------------------------------------------------------------------------------------------------------------------------------------------------------------------------------------------------------------------------------------------------------------------------------------------------------------------|----------|----------|---------|----------|---|---------|----------|----------|---|---------|----------|---------|---|---------|----------|----------|---|---------|----------|----------|---|---------|----------|----------|---|---------|----------|---------|---|---------|---------|----------|---|---------|----------|----------|---|---------|----------|---------|---|---------|----------|----------|---|---------|----------|---------|---|---------|----------|---------|---|---------|---------|----------|---|----------|---------|---------|---|----------|---------|---------|---|---------|---------|---------|---|---------|---------|---------|---|---------|---------|---------|---|---------|---------|---------|---|---------|---------|----------|---|---------|---------|----------|---|----------|---------|---------|---|----------|---------|---------|---|----------|---------|---------|---|----------|---------|---------|
| Number of<br>(-)<br>Vibrational<br>Frequencies | 0 (-895.0805)                                                                                                                                                                                                                                                                                                                                                                                                                                                                                                                                                                                                                                                                                                                                                                                                                                                                                                                                                                                                                                                                                                                                                                                                                                                                                                                                                                                                                                                                                                                                                                                                                                                                                                                                                                                                                                                                                                                                              |          |          |         |          |   |         |          |          |   |         |          |         |   |         |          |          |   |         |          |          |   |         |          |          |   |         |          |         |   |         |         |          |   |         |          |          |   |         |          |         |   |         |          |          |   |         |          |         |   |         |          |         |   |         |         |          |   |          |         |         |   |          |         |         |   |         |         |         |   |         |         |         |   |         |         |         |   |         |         |         |   |         |         |          |   |         |         |          |   |          |         |         |   |          |         |         |   |          |         |         |   |          |         |         |
| Absolute<br>Energies<br>(Hartrees)             | <p><b>B3LYP/6-31G(d) (PCM)</b></p> <p>There are 13 positive frequencies below 100 cm<sup>-1</sup>.</p> <p>Zero-point correction: 0.436348 hartree<br/>         Enthalpy correction: 0.467313 hartree<br/>         Free Energy correction: 0.373603 hartree<br/>         Quasiharmonic Free Energy correction: 0.383067 hartree</p> <p>SCF Energy: -1183.591887 hartree<br/>         SCF Energy + ZPVE: -1183.155539 hartree<br/>         Enthalpy: -1183.124574 hartree<br/>         Free Energy: -1183.218284 hartree</p> <p>Free Energy with quasiharmonic correction: -1183.208820 hartree<br/>         (correction: 5.94 kcal/mol)</p> <p><b>B3LYP-D3/6-311+G(d,p) (PCM)</b></p> <p>SCF Done: E(RB3LYP) = -1184.01513420 A.U.</p>                                                                                                                                                                                                                                                                                                                                                                                                                                                                                                                                                                                                                                                                                                                                                                                                                                                                                                                                                                                                                                                                                                                                                                                                                      |          |          |         |          |   |         |          |          |   |         |          |         |   |         |          |          |   |         |          |          |   |         |          |          |   |         |          |         |   |         |         |          |   |         |          |          |   |         |          |         |   |         |          |          |   |         |          |         |   |         |          |         |   |         |         |          |   |          |         |         |   |          |         |         |   |         |         |         |   |         |         |         |   |         |         |         |   |         |         |         |   |         |         |          |   |         |         |          |   |          |         |         |   |          |         |         |   |          |         |         |   |          |         |         |
| Cartesian<br>Coordinates                       | <p>(PCM)</p> <p>52</p> <p>spD3-TS1-T6.out Energy: -742980.7081498</p> <table> <tr><td>O</td><td>2.85349</td><td>2.10529</td><td>-0.10988</td></tr> <tr><td>C</td><td>2.74194</td><td>-2.56397</td><td>-0.14970</td></tr> <tr><td>C</td><td>2.20626</td><td>-1.31163</td><td>0.00998</td></tr> <tr><td>N</td><td>4.05677</td><td>-2.33821</td><td>-0.53243</td></tr> <tr><td>C</td><td>4.28129</td><td>-1.00960</td><td>-0.59458</td></tr> <tr><td>N</td><td>3.17190</td><td>-0.36395</td><td>-0.27001</td></tr> <tr><td>H</td><td>1.20665</td><td>-1.02057</td><td>0.29533</td></tr> <tr><td>H</td><td>3.00645</td><td>0.88639</td><td>-0.21113</td></tr> <tr><td>H</td><td>5.22376</td><td>-0.56012</td><td>-0.86798</td></tr> <tr><td>C</td><td>2.15968</td><td>-3.92847</td><td>0.01218</td></tr> <tr><td>H</td><td>2.20262</td><td>-4.49386</td><td>-0.92660</td></tr> <tr><td>H</td><td>2.69963</td><td>-4.50489</td><td>0.77305</td></tr> <tr><td>H</td><td>1.11353</td><td>-3.84860</td><td>0.32044</td></tr> <tr><td>C</td><td>1.51423</td><td>2.54155</td><td>-1.05366</td></tr> <tr><td>C</td><td>-0.68651</td><td>2.21351</td><td>0.11497</td></tr> <tr><td>O</td><td>-1.76419</td><td>1.60043</td><td>0.36231</td></tr> <tr><td>C</td><td>2.67876</td><td>2.41292</td><td>1.27258</td></tr> <tr><td>H</td><td>2.71500</td><td>3.49814</td><td>1.41217</td></tr> <tr><td>H</td><td>1.71916</td><td>2.03463</td><td>1.64358</td></tr> <tr><td>H</td><td>3.49761</td><td>1.95016</td><td>1.83310</td></tr> <tr><td>C</td><td>0.33352</td><td>1.79023</td><td>-0.74494</td></tr> <tr><td>H</td><td>0.16584</td><td>0.84485</td><td>-1.25364</td></tr> <tr><td>O</td><td>-0.47622</td><td>3.43423</td><td>0.72621</td></tr> <tr><td>C</td><td>-1.53521</td><td>3.91296</td><td>1.55427</td></tr> <tr><td>H</td><td>-1.18436</td><td>4.86484</td><td>1.95896</td></tr> <tr><td>H</td><td>-1.75107</td><td>3.21756</td><td>2.37134</td></tr> </table> | O        | 2.85349  | 2.10529 | -0.10988 | C | 2.74194 | -2.56397 | -0.14970 | C | 2.20626 | -1.31163 | 0.00998 | N | 4.05677 | -2.33821 | -0.53243 | C | 4.28129 | -1.00960 | -0.59458 | N | 3.17190 | -0.36395 | -0.27001 | H | 1.20665 | -1.02057 | 0.29533 | H | 3.00645 | 0.88639 | -0.21113 | H | 5.22376 | -0.56012 | -0.86798 | C | 2.15968 | -3.92847 | 0.01218 | H | 2.20262 | -4.49386 | -0.92660 | H | 2.69963 | -4.50489 | 0.77305 | H | 1.11353 | -3.84860 | 0.32044 | C | 1.51423 | 2.54155 | -1.05366 | C | -0.68651 | 2.21351 | 0.11497 | O | -1.76419 | 1.60043 | 0.36231 | C | 2.67876 | 2.41292 | 1.27258 | H | 2.71500 | 3.49814 | 1.41217 | H | 1.71916 | 2.03463 | 1.64358 | H | 3.49761 | 1.95016 | 1.83310 | C | 0.33352 | 1.79023 | -0.74494 | H | 0.16584 | 0.84485 | -1.25364 | O | -0.47622 | 3.43423 | 0.72621 | C | -1.53521 | 3.91296 | 1.55427 | H | -1.18436 | 4.86484 | 1.95896 | H | -1.75107 | 3.21756 | 2.37134 |
| O                                              | 2.85349                                                                                                                                                                                                                                                                                                                                                                                                                                                                                                                                                                                                                                                                                                                                                                                                                                                                                                                                                                                                                                                                                                                                                                                                                                                                                                                                                                                                                                                                                                                                                                                                                                                                                                                                                                                                                                                                                                                                                    | 2.10529  | -0.10988 |         |          |   |         |          |          |   |         |          |         |   |         |          |          |   |         |          |          |   |         |          |          |   |         |          |         |   |         |         |          |   |         |          |          |   |         |          |         |   |         |          |          |   |         |          |         |   |         |          |         |   |         |         |          |   |          |         |         |   |          |         |         |   |         |         |         |   |         |         |         |   |         |         |         |   |         |         |         |   |         |         |          |   |         |         |          |   |          |         |         |   |          |         |         |   |          |         |         |   |          |         |         |
| C                                              | 2.74194                                                                                                                                                                                                                                                                                                                                                                                                                                                                                                                                                                                                                                                                                                                                                                                                                                                                                                                                                                                                                                                                                                                                                                                                                                                                                                                                                                                                                                                                                                                                                                                                                                                                                                                                                                                                                                                                                                                                                    | -2.56397 | -0.14970 |         |          |   |         |          |          |   |         |          |         |   |         |          |          |   |         |          |          |   |         |          |          |   |         |          |         |   |         |         |          |   |         |          |          |   |         |          |         |   |         |          |          |   |         |          |         |   |         |          |         |   |         |         |          |   |          |         |         |   |          |         |         |   |         |         |         |   |         |         |         |   |         |         |         |   |         |         |         |   |         |         |          |   |         |         |          |   |          |         |         |   |          |         |         |   |          |         |         |   |          |         |         |
| C                                              | 2.20626                                                                                                                                                                                                                                                                                                                                                                                                                                                                                                                                                                                                                                                                                                                                                                                                                                                                                                                                                                                                                                                                                                                                                                                                                                                                                                                                                                                                                                                                                                                                                                                                                                                                                                                                                                                                                                                                                                                                                    | -1.31163 | 0.00998  |         |          |   |         |          |          |   |         |          |         |   |         |          |          |   |         |          |          |   |         |          |          |   |         |          |         |   |         |         |          |   |         |          |          |   |         |          |         |   |         |          |          |   |         |          |         |   |         |          |         |   |         |         |          |   |          |         |         |   |          |         |         |   |         |         |         |   |         |         |         |   |         |         |         |   |         |         |         |   |         |         |          |   |         |         |          |   |          |         |         |   |          |         |         |   |          |         |         |   |          |         |         |
| N                                              | 4.05677                                                                                                                                                                                                                                                                                                                                                                                                                                                                                                                                                                                                                                                                                                                                                                                                                                                                                                                                                                                                                                                                                                                                                                                                                                                                                                                                                                                                                                                                                                                                                                                                                                                                                                                                                                                                                                                                                                                                                    | -2.33821 | -0.53243 |         |          |   |         |          |          |   |         |          |         |   |         |          |          |   |         |          |          |   |         |          |          |   |         |          |         |   |         |         |          |   |         |          |          |   |         |          |         |   |         |          |          |   |         |          |         |   |         |          |         |   |         |         |          |   |          |         |         |   |          |         |         |   |         |         |         |   |         |         |         |   |         |         |         |   |         |         |         |   |         |         |          |   |         |         |          |   |          |         |         |   |          |         |         |   |          |         |         |   |          |         |         |
| C                                              | 4.28129                                                                                                                                                                                                                                                                                                                                                                                                                                                                                                                                                                                                                                                                                                                                                                                                                                                                                                                                                                                                                                                                                                                                                                                                                                                                                                                                                                                                                                                                                                                                                                                                                                                                                                                                                                                                                                                                                                                                                    | -1.00960 | -0.59458 |         |          |   |         |          |          |   |         |          |         |   |         |          |          |   |         |          |          |   |         |          |          |   |         |          |         |   |         |         |          |   |         |          |          |   |         |          |         |   |         |          |          |   |         |          |         |   |         |          |         |   |         |         |          |   |          |         |         |   |          |         |         |   |         |         |         |   |         |         |         |   |         |         |         |   |         |         |         |   |         |         |          |   |         |         |          |   |          |         |         |   |          |         |         |   |          |         |         |   |          |         |         |
| N                                              | 3.17190                                                                                                                                                                                                                                                                                                                                                                                                                                                                                                                                                                                                                                                                                                                                                                                                                                                                                                                                                                                                                                                                                                                                                                                                                                                                                                                                                                                                                                                                                                                                                                                                                                                                                                                                                                                                                                                                                                                                                    | -0.36395 | -0.27001 |         |          |   |         |          |          |   |         |          |         |   |         |          |          |   |         |          |          |   |         |          |          |   |         |          |         |   |         |         |          |   |         |          |          |   |         |          |         |   |         |          |          |   |         |          |         |   |         |          |         |   |         |         |          |   |          |         |         |   |          |         |         |   |         |         |         |   |         |         |         |   |         |         |         |   |         |         |         |   |         |         |          |   |         |         |          |   |          |         |         |   |          |         |         |   |          |         |         |   |          |         |         |
| H                                              | 1.20665                                                                                                                                                                                                                                                                                                                                                                                                                                                                                                                                                                                                                                                                                                                                                                                                                                                                                                                                                                                                                                                                                                                                                                                                                                                                                                                                                                                                                                                                                                                                                                                                                                                                                                                                                                                                                                                                                                                                                    | -1.02057 | 0.29533  |         |          |   |         |          |          |   |         |          |         |   |         |          |          |   |         |          |          |   |         |          |          |   |         |          |         |   |         |         |          |   |         |          |          |   |         |          |         |   |         |          |          |   |         |          |         |   |         |          |         |   |         |         |          |   |          |         |         |   |          |         |         |   |         |         |         |   |         |         |         |   |         |         |         |   |         |         |         |   |         |         |          |   |         |         |          |   |          |         |         |   |          |         |         |   |          |         |         |   |          |         |         |
| H                                              | 3.00645                                                                                                                                                                                                                                                                                                                                                                                                                                                                                                                                                                                                                                                                                                                                                                                                                                                                                                                                                                                                                                                                                                                                                                                                                                                                                                                                                                                                                                                                                                                                                                                                                                                                                                                                                                                                                                                                                                                                                    | 0.88639  | -0.21113 |         |          |   |         |          |          |   |         |          |         |   |         |          |          |   |         |          |          |   |         |          |          |   |         |          |         |   |         |         |          |   |         |          |          |   |         |          |         |   |         |          |          |   |         |          |         |   |         |          |         |   |         |         |          |   |          |         |         |   |          |         |         |   |         |         |         |   |         |         |         |   |         |         |         |   |         |         |         |   |         |         |          |   |         |         |          |   |          |         |         |   |          |         |         |   |          |         |         |   |          |         |         |
| H                                              | 5.22376                                                                                                                                                                                                                                                                                                                                                                                                                                                                                                                                                                                                                                                                                                                                                                                                                                                                                                                                                                                                                                                                                                                                                                                                                                                                                                                                                                                                                                                                                                                                                                                                                                                                                                                                                                                                                                                                                                                                                    | -0.56012 | -0.86798 |         |          |   |         |          |          |   |         |          |         |   |         |          |          |   |         |          |          |   |         |          |          |   |         |          |         |   |         |         |          |   |         |          |          |   |         |          |         |   |         |          |          |   |         |          |         |   |         |          |         |   |         |         |          |   |          |         |         |   |          |         |         |   |         |         |         |   |         |         |         |   |         |         |         |   |         |         |         |   |         |         |          |   |         |         |          |   |          |         |         |   |          |         |         |   |          |         |         |   |          |         |         |
| C                                              | 2.15968                                                                                                                                                                                                                                                                                                                                                                                                                                                                                                                                                                                                                                                                                                                                                                                                                                                                                                                                                                                                                                                                                                                                                                                                                                                                                                                                                                                                                                                                                                                                                                                                                                                                                                                                                                                                                                                                                                                                                    | -3.92847 | 0.01218  |         |          |   |         |          |          |   |         |          |         |   |         |          |          |   |         |          |          |   |         |          |          |   |         |          |         |   |         |         |          |   |         |          |          |   |         |          |         |   |         |          |          |   |         |          |         |   |         |          |         |   |         |         |          |   |          |         |         |   |          |         |         |   |         |         |         |   |         |         |         |   |         |         |         |   |         |         |         |   |         |         |          |   |         |         |          |   |          |         |         |   |          |         |         |   |          |         |         |   |          |         |         |
| H                                              | 2.20262                                                                                                                                                                                                                                                                                                                                                                                                                                                                                                                                                                                                                                                                                                                                                                                                                                                                                                                                                                                                                                                                                                                                                                                                                                                                                                                                                                                                                                                                                                                                                                                                                                                                                                                                                                                                                                                                                                                                                    | -4.49386 | -0.92660 |         |          |   |         |          |          |   |         |          |         |   |         |          |          |   |         |          |          |   |         |          |          |   |         |          |         |   |         |         |          |   |         |          |          |   |         |          |         |   |         |          |          |   |         |          |         |   |         |          |         |   |         |         |          |   |          |         |         |   |          |         |         |   |         |         |         |   |         |         |         |   |         |         |         |   |         |         |         |   |         |         |          |   |         |         |          |   |          |         |         |   |          |         |         |   |          |         |         |   |          |         |         |
| H                                              | 2.69963                                                                                                                                                                                                                                                                                                                                                                                                                                                                                                                                                                                                                                                                                                                                                                                                                                                                                                                                                                                                                                                                                                                                                                                                                                                                                                                                                                                                                                                                                                                                                                                                                                                                                                                                                                                                                                                                                                                                                    | -4.50489 | 0.77305  |         |          |   |         |          |          |   |         |          |         |   |         |          |          |   |         |          |          |   |         |          |          |   |         |          |         |   |         |         |          |   |         |          |          |   |         |          |         |   |         |          |          |   |         |          |         |   |         |          |         |   |         |         |          |   |          |         |         |   |          |         |         |   |         |         |         |   |         |         |         |   |         |         |         |   |         |         |         |   |         |         |          |   |         |         |          |   |          |         |         |   |          |         |         |   |          |         |         |   |          |         |         |
| H                                              | 1.11353                                                                                                                                                                                                                                                                                                                                                                                                                                                                                                                                                                                                                                                                                                                                                                                                                                                                                                                                                                                                                                                                                                                                                                                                                                                                                                                                                                                                                                                                                                                                                                                                                                                                                                                                                                                                                                                                                                                                                    | -3.84860 | 0.32044  |         |          |   |         |          |          |   |         |          |         |   |         |          |          |   |         |          |          |   |         |          |          |   |         |          |         |   |         |         |          |   |         |          |          |   |         |          |         |   |         |          |          |   |         |          |         |   |         |          |         |   |         |         |          |   |          |         |         |   |          |         |         |   |         |         |         |   |         |         |         |   |         |         |         |   |         |         |         |   |         |         |          |   |         |         |          |   |          |         |         |   |          |         |         |   |          |         |         |   |          |         |         |
| C                                              | 1.51423                                                                                                                                                                                                                                                                                                                                                                                                                                                                                                                                                                                                                                                                                                                                                                                                                                                                                                                                                                                                                                                                                                                                                                                                                                                                                                                                                                                                                                                                                                                                                                                                                                                                                                                                                                                                                                                                                                                                                    | 2.54155  | -1.05366 |         |          |   |         |          |          |   |         |          |         |   |         |          |          |   |         |          |          |   |         |          |          |   |         |          |         |   |         |         |          |   |         |          |          |   |         |          |         |   |         |          |          |   |         |          |         |   |         |          |         |   |         |         |          |   |          |         |         |   |          |         |         |   |         |         |         |   |         |         |         |   |         |         |         |   |         |         |         |   |         |         |          |   |         |         |          |   |          |         |         |   |          |         |         |   |          |         |         |   |          |         |         |
| C                                              | -0.68651                                                                                                                                                                                                                                                                                                                                                                                                                                                                                                                                                                                                                                                                                                                                                                                                                                                                                                                                                                                                                                                                                                                                                                                                                                                                                                                                                                                                                                                                                                                                                                                                                                                                                                                                                                                                                                                                                                                                                   | 2.21351  | 0.11497  |         |          |   |         |          |          |   |         |          |         |   |         |          |          |   |         |          |          |   |         |          |          |   |         |          |         |   |         |         |          |   |         |          |          |   |         |          |         |   |         |          |          |   |         |          |         |   |         |          |         |   |         |         |          |   |          |         |         |   |          |         |         |   |         |         |         |   |         |         |         |   |         |         |         |   |         |         |         |   |         |         |          |   |         |         |          |   |          |         |         |   |          |         |         |   |          |         |         |   |          |         |         |
| O                                              | -1.76419                                                                                                                                                                                                                                                                                                                                                                                                                                                                                                                                                                                                                                                                                                                                                                                                                                                                                                                                                                                                                                                                                                                                                                                                                                                                                                                                                                                                                                                                                                                                                                                                                                                                                                                                                                                                                                                                                                                                                   | 1.60043  | 0.36231  |         |          |   |         |          |          |   |         |          |         |   |         |          |          |   |         |          |          |   |         |          |          |   |         |          |         |   |         |         |          |   |         |          |          |   |         |          |         |   |         |          |          |   |         |          |         |   |         |          |         |   |         |         |          |   |          |         |         |   |          |         |         |   |         |         |         |   |         |         |         |   |         |         |         |   |         |         |         |   |         |         |          |   |         |         |          |   |          |         |         |   |          |         |         |   |          |         |         |   |          |         |         |
| C                                              | 2.67876                                                                                                                                                                                                                                                                                                                                                                                                                                                                                                                                                                                                                                                                                                                                                                                                                                                                                                                                                                                                                                                                                                                                                                                                                                                                                                                                                                                                                                                                                                                                                                                                                                                                                                                                                                                                                                                                                                                                                    | 2.41292  | 1.27258  |         |          |   |         |          |          |   |         |          |         |   |         |          |          |   |         |          |          |   |         |          |          |   |         |          |         |   |         |         |          |   |         |          |          |   |         |          |         |   |         |          |          |   |         |          |         |   |         |          |         |   |         |         |          |   |          |         |         |   |          |         |         |   |         |         |         |   |         |         |         |   |         |         |         |   |         |         |         |   |         |         |          |   |         |         |          |   |          |         |         |   |          |         |         |   |          |         |         |   |          |         |         |
| H                                              | 2.71500                                                                                                                                                                                                                                                                                                                                                                                                                                                                                                                                                                                                                                                                                                                                                                                                                                                                                                                                                                                                                                                                                                                                                                                                                                                                                                                                                                                                                                                                                                                                                                                                                                                                                                                                                                                                                                                                                                                                                    | 3.49814  | 1.41217  |         |          |   |         |          |          |   |         |          |         |   |         |          |          |   |         |          |          |   |         |          |          |   |         |          |         |   |         |         |          |   |         |          |          |   |         |          |         |   |         |          |          |   |         |          |         |   |         |          |         |   |         |         |          |   |          |         |         |   |          |         |         |   |         |         |         |   |         |         |         |   |         |         |         |   |         |         |         |   |         |         |          |   |         |         |          |   |          |         |         |   |          |         |         |   |          |         |         |   |          |         |         |
| H                                              | 1.71916                                                                                                                                                                                                                                                                                                                                                                                                                                                                                                                                                                                                                                                                                                                                                                                                                                                                                                                                                                                                                                                                                                                                                                                                                                                                                                                                                                                                                                                                                                                                                                                                                                                                                                                                                                                                                                                                                                                                                    | 2.03463  | 1.64358  |         |          |   |         |          |          |   |         |          |         |   |         |          |          |   |         |          |          |   |         |          |          |   |         |          |         |   |         |         |          |   |         |          |          |   |         |          |         |   |         |          |          |   |         |          |         |   |         |          |         |   |         |         |          |   |          |         |         |   |          |         |         |   |         |         |         |   |         |         |         |   |         |         |         |   |         |         |         |   |         |         |          |   |         |         |          |   |          |         |         |   |          |         |         |   |          |         |         |   |          |         |         |
| H                                              | 3.49761                                                                                                                                                                                                                                                                                                                                                                                                                                                                                                                                                                                                                                                                                                                                                                                                                                                                                                                                                                                                                                                                                                                                                                                                                                                                                                                                                                                                                                                                                                                                                                                                                                                                                                                                                                                                                                                                                                                                                    | 1.95016  | 1.83310  |         |          |   |         |          |          |   |         |          |         |   |         |          |          |   |         |          |          |   |         |          |          |   |         |          |         |   |         |         |          |   |         |          |          |   |         |          |         |   |         |          |          |   |         |          |         |   |         |          |         |   |         |         |          |   |          |         |         |   |          |         |         |   |         |         |         |   |         |         |         |   |         |         |         |   |         |         |         |   |         |         |          |   |         |         |          |   |          |         |         |   |          |         |         |   |          |         |         |   |          |         |         |
| C                                              | 0.33352                                                                                                                                                                                                                                                                                                                                                                                                                                                                                                                                                                                                                                                                                                                                                                                                                                                                                                                                                                                                                                                                                                                                                                                                                                                                                                                                                                                                                                                                                                                                                                                                                                                                                                                                                                                                                                                                                                                                                    | 1.79023  | -0.74494 |         |          |   |         |          |          |   |         |          |         |   |         |          |          |   |         |          |          |   |         |          |          |   |         |          |         |   |         |         |          |   |         |          |          |   |         |          |         |   |         |          |          |   |         |          |         |   |         |          |         |   |         |         |          |   |          |         |         |   |          |         |         |   |         |         |         |   |         |         |         |   |         |         |         |   |         |         |         |   |         |         |          |   |         |         |          |   |          |         |         |   |          |         |         |   |          |         |         |   |          |         |         |
| H                                              | 0.16584                                                                                                                                                                                                                                                                                                                                                                                                                                                                                                                                                                                                                                                                                                                                                                                                                                                                                                                                                                                                                                                                                                                                                                                                                                                                                                                                                                                                                                                                                                                                                                                                                                                                                                                                                                                                                                                                                                                                                    | 0.84485  | -1.25364 |         |          |   |         |          |          |   |         |          |         |   |         |          |          |   |         |          |          |   |         |          |          |   |         |          |         |   |         |         |          |   |         |          |          |   |         |          |         |   |         |          |          |   |         |          |         |   |         |          |         |   |         |         |          |   |          |         |         |   |          |         |         |   |         |         |         |   |         |         |         |   |         |         |         |   |         |         |         |   |         |         |          |   |         |         |          |   |          |         |         |   |          |         |         |   |          |         |         |   |          |         |         |
| O                                              | -0.47622                                                                                                                                                                                                                                                                                                                                                                                                                                                                                                                                                                                                                                                                                                                                                                                                                                                                                                                                                                                                                                                                                                                                                                                                                                                                                                                                                                                                                                                                                                                                                                                                                                                                                                                                                                                                                                                                                                                                                   | 3.43423  | 0.72621  |         |          |   |         |          |          |   |         |          |         |   |         |          |          |   |         |          |          |   |         |          |          |   |         |          |         |   |         |         |          |   |         |          |          |   |         |          |         |   |         |          |          |   |         |          |         |   |         |          |         |   |         |         |          |   |          |         |         |   |          |         |         |   |         |         |         |   |         |         |         |   |         |         |         |   |         |         |         |   |         |         |          |   |         |         |          |   |          |         |         |   |          |         |         |   |          |         |         |   |          |         |         |
| C                                              | -1.53521                                                                                                                                                                                                                                                                                                                                                                                                                                                                                                                                                                                                                                                                                                                                                                                                                                                                                                                                                                                                                                                                                                                                                                                                                                                                                                                                                                                                                                                                                                                                                                                                                                                                                                                                                                                                                                                                                                                                                   | 3.91296  | 1.55427  |         |          |   |         |          |          |   |         |          |         |   |         |          |          |   |         |          |          |   |         |          |          |   |         |          |         |   |         |         |          |   |         |          |          |   |         |          |         |   |         |          |          |   |         |          |         |   |         |          |         |   |         |         |          |   |          |         |         |   |          |         |         |   |         |         |         |   |         |         |         |   |         |         |         |   |         |         |         |   |         |         |          |   |         |         |          |   |          |         |         |   |          |         |         |   |          |         |         |   |          |         |         |
| H                                              | -1.18436                                                                                                                                                                                                                                                                                                                                                                                                                                                                                                                                                                                                                                                                                                                                                                                                                                                                                                                                                                                                                                                                                                                                                                                                                                                                                                                                                                                                                                                                                                                                                                                                                                                                                                                                                                                                                                                                                                                                                   | 4.86484  | 1.95896  |         |          |   |         |          |          |   |         |          |         |   |         |          |          |   |         |          |          |   |         |          |          |   |         |          |         |   |         |         |          |   |         |          |          |   |         |          |         |   |         |          |          |   |         |          |         |   |         |          |         |   |         |         |          |   |          |         |         |   |          |         |         |   |         |         |         |   |         |         |         |   |         |         |         |   |         |         |         |   |         |         |          |   |         |         |          |   |          |         |         |   |          |         |         |   |          |         |         |   |          |         |         |
| H                                              | -1.75107                                                                                                                                                                                                                                                                                                                                                                                                                                                                                                                                                                                                                                                                                                                                                                                                                                                                                                                                                                                                                                                                                                                                                                                                                                                                                                                                                                                                                                                                                                                                                                                                                                                                                                                                                                                                                                                                                                                                                   | 3.21756  | 2.37134  |         |          |   |         |          |          |   |         |          |         |   |         |          |          |   |         |          |          |   |         |          |          |   |         |          |         |   |         |         |          |   |         |          |          |   |         |          |         |   |         |          |          |   |         |          |         |   |         |          |         |   |         |         |          |   |          |         |         |   |          |         |         |   |         |         |         |   |         |         |         |   |         |         |         |   |         |         |         |   |         |         |          |   |         |         |          |   |          |         |         |   |          |         |         |   |          |         |         |   |          |         |         |

|   |          |          |          |
|---|----------|----------|----------|
| H | -2.45407 | 4.07037  | 0.98025  |
| C | 2.11075  | 2.36652  | -2.43785 |
| H | 1.46416  | 3.58646  | -0.74792 |
| H | 1.45060  | 2.83860  | -3.17364 |
| H | 3.09951  | 2.82883  | -2.51205 |
| H | 2.19678  | 1.30640  | -2.70150 |
| C | -1.45298 | -2.13652 | 0.73294  |
| O | -1.02877 | -3.25343 | 1.05611  |
| C | -2.07309 | -1.93558 | -0.65730 |
| N | -2.85366 | -0.73220 | -0.85081 |
| H | -2.41981 | 0.17332  | -0.64811 |
| H | -2.72629 | -2.78887 | -0.84880 |
| H | -1.24911 | -1.98709 | -1.38322 |
| N | -1.35957 | -1.05704 | 1.53813  |
| H | -1.62546 | -0.12955 | 1.20008  |
| C | -0.76706 | -1.16382 | 2.86210  |
| H | 0.31299  | -1.35056 | 2.81086  |
| H | -0.93965 | -0.22778 | 3.39722  |
| H | -1.22452 | -1.98683 | 3.41876  |
| C | -4.19330 | -0.77389 | -1.09466 |
| O | -4.82372 | -1.82061 | -1.25996 |
| C | -4.86471 | 0.58842  | -1.18396 |
| H | -5.13890 | 0.78665  | -2.22639 |
| H | -5.79033 | 0.56325  | -0.60153 |
| H | -4.22699 | 1.39947  | -0.82255 |
| H | 4.74205  | -3.05439 | -0.73662 |

Optimized Molecular Properties for **T6-INT1**

|                                                |                                                                                                                                                                                                                                                                                                                                                                                                                                                                                                                                                                                                                                                                                                                                                                                                                                                                                                                                                                                                                                                                                                                                                                                                                                                                                                                                                                                                                                                                                                                                                                                                                                                                                                                                                                                                                                                                                                                                                             |          |          |         |          |   |         |          |          |   |         |          |         |   |         |          |          |   |         |          |          |   |         |          |          |   |         |          |         |   |         |         |          |   |         |          |          |   |         |          |         |   |         |          |          |   |         |          |         |   |         |          |         |   |         |         |          |   |          |         |         |   |          |         |         |   |         |         |         |   |         |         |         |   |         |         |         |   |         |         |         |   |         |         |          |   |         |         |          |   |          |         |         |   |          |         |         |   |          |         |         |   |          |         |         |
|------------------------------------------------|-------------------------------------------------------------------------------------------------------------------------------------------------------------------------------------------------------------------------------------------------------------------------------------------------------------------------------------------------------------------------------------------------------------------------------------------------------------------------------------------------------------------------------------------------------------------------------------------------------------------------------------------------------------------------------------------------------------------------------------------------------------------------------------------------------------------------------------------------------------------------------------------------------------------------------------------------------------------------------------------------------------------------------------------------------------------------------------------------------------------------------------------------------------------------------------------------------------------------------------------------------------------------------------------------------------------------------------------------------------------------------------------------------------------------------------------------------------------------------------------------------------------------------------------------------------------------------------------------------------------------------------------------------------------------------------------------------------------------------------------------------------------------------------------------------------------------------------------------------------------------------------------------------------------------------------------------------------|----------|----------|---------|----------|---|---------|----------|----------|---|---------|----------|---------|---|---------|----------|----------|---|---------|----------|----------|---|---------|----------|----------|---|---------|----------|---------|---|---------|---------|----------|---|---------|----------|----------|---|---------|----------|---------|---|---------|----------|----------|---|---------|----------|---------|---|---------|----------|---------|---|---------|---------|----------|---|----------|---------|---------|---|----------|---------|---------|---|---------|---------|---------|---|---------|---------|---------|---|---------|---------|---------|---|---------|---------|---------|---|---------|---------|----------|---|---------|---------|----------|---|----------|---------|---------|---|----------|---------|---------|---|----------|---------|---------|---|----------|---------|---------|
| Number of<br>(-)<br>Vibrational<br>Frequencies | 0                                                                                                                                                                                                                                                                                                                                                                                                                                                                                                                                                                                                                                                                                                                                                                                                                                                                                                                                                                                                                                                                                                                                                                                                                                                                                                                                                                                                                                                                                                                                                                                                                                                                                                                                                                                                                                                                                                                                                           |          |          |         |          |   |         |          |          |   |         |          |         |   |         |          |          |   |         |          |          |   |         |          |          |   |         |          |         |   |         |         |          |   |         |          |          |   |         |          |         |   |         |          |          |   |         |          |         |   |         |          |         |   |         |         |          |   |          |         |         |   |          |         |         |   |         |         |         |   |         |         |         |   |         |         |         |   |         |         |         |   |         |         |          |   |         |         |          |   |          |         |         |   |          |         |         |   |          |         |         |   |          |         |         |
| Absolute<br>Energies<br>(Hartrees)             | <p><b>B3LYP/6-31G(d) (PCM)</b></p> <p>There are 14 positive frequencies below 100 cm<sup>-1</sup>.</p> <p>Zero-point correction: 0.441328 hartree<br/>         Enthalpy correction: 0.472149 hartree<br/>         Free Energy correction: 0.378896 hartree<br/>         Quasiharmonic Free Energy correction: 0.388125 hartree</p> <p>SCF Energy: -1183.596706 hartree<br/>         SCF Energy + ZPVE: -1183.155378 hartree<br/>         Enthalpy: -1183.124557 hartree<br/>         Free Energy: -1183.217810 hartree</p> <p>Free Energy with quasiharmonic correction: -1183.208581 hartree<br/>         (correction: 5.79 kcal/mol)</p> <p><b>B3LYP-D3/6-311+G(d,p) (PCM)</b></p> <p>SCF Done: E(RB3LYP) = -1184.01843606 A.U.</p>                                                                                                                                                                                                                                                                                                                                                                                                                                                                                                                                                                                                                                                                                                                                                                                                                                                                                                                                                                                                                                                                                                                                                                                                                       |          |          |         |          |   |         |          |          |   |         |          |         |   |         |          |          |   |         |          |          |   |         |          |          |   |         |          |         |   |         |         |          |   |         |          |          |   |         |          |         |   |         |          |          |   |         |          |         |   |         |          |         |   |         |         |          |   |          |         |         |   |          |         |         |   |         |         |         |   |         |         |         |   |         |         |         |   |         |         |         |   |         |         |          |   |         |         |          |   |          |         |         |   |          |         |         |   |          |         |         |   |          |         |         |
| Cartesian<br>Coordinates                       | <p>(PCM)</p> <p>52</p> <p>spD3-INT1-T6.out Energy: -742982.7800982</p> <table> <tr><td>O</td><td>2.92195</td><td>2.06882</td><td>-0.25275</td></tr> <tr><td>C</td><td>2.46087</td><td>-2.74724</td><td>-0.13211</td></tr> <tr><td>C</td><td>2.01693</td><td>-1.46160</td><td>0.03182</td></tr> <tr><td>N</td><td>3.74113</td><td>-2.62210</td><td>-0.65948</td></tr> <tr><td>C</td><td>4.05407</td><td>-1.32608</td><td>-0.80607</td></tr> <tr><td>N</td><td>3.01704</td><td>-0.60828</td><td>-0.39130</td></tr> <tr><td>H</td><td>1.07937</td><td>-1.07725</td><td>0.40271</td></tr> <tr><td>H</td><td>2.96660</td><td>0.45744</td><td>-0.37413</td></tr> <tr><td>H</td><td>4.98327</td><td>-0.94051</td><td>-1.19458</td></tr> <tr><td>C</td><td>1.82274</td><td>-4.06582</td><td>0.14766</td></tr> <tr><td>H</td><td>1.77963</td><td>-4.68204</td><td>-0.75775</td></tr> <tr><td>H</td><td>2.38435</td><td>-4.62297</td><td>0.90682</td></tr> <tr><td>H</td><td>0.80290</td><td>-3.91412</td><td>0.51220</td></tr> <tr><td>C</td><td>1.68106</td><td>2.57194</td><td>-0.96508</td></tr> <tr><td>C</td><td>-0.52484</td><td>2.20264</td><td>0.24185</td></tr> <tr><td>O</td><td>-1.63650</td><td>1.62021</td><td>0.47802</td></tr> <tr><td>C</td><td>2.92778</td><td>2.38447</td><td>1.13544</td></tr> <tr><td>H</td><td>2.96811</td><td>3.47189</td><td>1.28100</td></tr> <tr><td>H</td><td>2.03362</td><td>1.99682</td><td>1.63815</td></tr> <tr><td>H</td><td>3.82381</td><td>1.93232</td><td>1.57203</td></tr> <tr><td>C</td><td>0.45817</td><td>1.80719</td><td>-0.64705</td></tr> <tr><td>H</td><td>0.23817</td><td>0.92567</td><td>-1.24514</td></tr> <tr><td>O</td><td>-0.25926</td><td>3.37480</td><td>0.94641</td></tr> <tr><td>C</td><td>-1.29149</td><td>3.83243</td><td>1.81267</td></tr> <tr><td>H</td><td>-0.91398</td><td>4.75575</td><td>2.25987</td></tr> <tr><td>H</td><td>-1.51231</td><td>3.10567</td><td>2.60216</td></tr> </table> | O        | 2.92195  | 2.06882 | -0.25275 | C | 2.46087 | -2.74724 | -0.13211 | C | 2.01693 | -1.46160 | 0.03182 | N | 3.74113 | -2.62210 | -0.65948 | C | 4.05407 | -1.32608 | -0.80607 | N | 3.01704 | -0.60828 | -0.39130 | H | 1.07937 | -1.07725 | 0.40271 | H | 2.96660 | 0.45744 | -0.37413 | H | 4.98327 | -0.94051 | -1.19458 | C | 1.82274 | -4.06582 | 0.14766 | H | 1.77963 | -4.68204 | -0.75775 | H | 2.38435 | -4.62297 | 0.90682 | H | 0.80290 | -3.91412 | 0.51220 | C | 1.68106 | 2.57194 | -0.96508 | C | -0.52484 | 2.20264 | 0.24185 | O | -1.63650 | 1.62021 | 0.47802 | C | 2.92778 | 2.38447 | 1.13544 | H | 2.96811 | 3.47189 | 1.28100 | H | 2.03362 | 1.99682 | 1.63815 | H | 3.82381 | 1.93232 | 1.57203 | C | 0.45817 | 1.80719 | -0.64705 | H | 0.23817 | 0.92567 | -1.24514 | O | -0.25926 | 3.37480 | 0.94641 | C | -1.29149 | 3.83243 | 1.81267 | H | -0.91398 | 4.75575 | 2.25987 | H | -1.51231 | 3.10567 | 2.60216 |
| O                                              | 2.92195                                                                                                                                                                                                                                                                                                                                                                                                                                                                                                                                                                                                                                                                                                                                                                                                                                                                                                                                                                                                                                                                                                                                                                                                                                                                                                                                                                                                                                                                                                                                                                                                                                                                                                                                                                                                                                                                                                                                                     | 2.06882  | -0.25275 |         |          |   |         |          |          |   |         |          |         |   |         |          |          |   |         |          |          |   |         |          |          |   |         |          |         |   |         |         |          |   |         |          |          |   |         |          |         |   |         |          |          |   |         |          |         |   |         |          |         |   |         |         |          |   |          |         |         |   |          |         |         |   |         |         |         |   |         |         |         |   |         |         |         |   |         |         |         |   |         |         |          |   |         |         |          |   |          |         |         |   |          |         |         |   |          |         |         |   |          |         |         |
| C                                              | 2.46087                                                                                                                                                                                                                                                                                                                                                                                                                                                                                                                                                                                                                                                                                                                                                                                                                                                                                                                                                                                                                                                                                                                                                                                                                                                                                                                                                                                                                                                                                                                                                                                                                                                                                                                                                                                                                                                                                                                                                     | -2.74724 | -0.13211 |         |          |   |         |          |          |   |         |          |         |   |         |          |          |   |         |          |          |   |         |          |          |   |         |          |         |   |         |         |          |   |         |          |          |   |         |          |         |   |         |          |          |   |         |          |         |   |         |          |         |   |         |         |          |   |          |         |         |   |          |         |         |   |         |         |         |   |         |         |         |   |         |         |         |   |         |         |         |   |         |         |          |   |         |         |          |   |          |         |         |   |          |         |         |   |          |         |         |   |          |         |         |
| C                                              | 2.01693                                                                                                                                                                                                                                                                                                                                                                                                                                                                                                                                                                                                                                                                                                                                                                                                                                                                                                                                                                                                                                                                                                                                                                                                                                                                                                                                                                                                                                                                                                                                                                                                                                                                                                                                                                                                                                                                                                                                                     | -1.46160 | 0.03182  |         |          |   |         |          |          |   |         |          |         |   |         |          |          |   |         |          |          |   |         |          |          |   |         |          |         |   |         |         |          |   |         |          |          |   |         |          |         |   |         |          |          |   |         |          |         |   |         |          |         |   |         |         |          |   |          |         |         |   |          |         |         |   |         |         |         |   |         |         |         |   |         |         |         |   |         |         |         |   |         |         |          |   |         |         |          |   |          |         |         |   |          |         |         |   |          |         |         |   |          |         |         |
| N                                              | 3.74113                                                                                                                                                                                                                                                                                                                                                                                                                                                                                                                                                                                                                                                                                                                                                                                                                                                                                                                                                                                                                                                                                                                                                                                                                                                                                                                                                                                                                                                                                                                                                                                                                                                                                                                                                                                                                                                                                                                                                     | -2.62210 | -0.65948 |         |          |   |         |          |          |   |         |          |         |   |         |          |          |   |         |          |          |   |         |          |          |   |         |          |         |   |         |         |          |   |         |          |          |   |         |          |         |   |         |          |          |   |         |          |         |   |         |          |         |   |         |         |          |   |          |         |         |   |          |         |         |   |         |         |         |   |         |         |         |   |         |         |         |   |         |         |         |   |         |         |          |   |         |         |          |   |          |         |         |   |          |         |         |   |          |         |         |   |          |         |         |
| C                                              | 4.05407                                                                                                                                                                                                                                                                                                                                                                                                                                                                                                                                                                                                                                                                                                                                                                                                                                                                                                                                                                                                                                                                                                                                                                                                                                                                                                                                                                                                                                                                                                                                                                                                                                                                                                                                                                                                                                                                                                                                                     | -1.32608 | -0.80607 |         |          |   |         |          |          |   |         |          |         |   |         |          |          |   |         |          |          |   |         |          |          |   |         |          |         |   |         |         |          |   |         |          |          |   |         |          |         |   |         |          |          |   |         |          |         |   |         |          |         |   |         |         |          |   |          |         |         |   |          |         |         |   |         |         |         |   |         |         |         |   |         |         |         |   |         |         |         |   |         |         |          |   |         |         |          |   |          |         |         |   |          |         |         |   |          |         |         |   |          |         |         |
| N                                              | 3.01704                                                                                                                                                                                                                                                                                                                                                                                                                                                                                                                                                                                                                                                                                                                                                                                                                                                                                                                                                                                                                                                                                                                                                                                                                                                                                                                                                                                                                                                                                                                                                                                                                                                                                                                                                                                                                                                                                                                                                     | -0.60828 | -0.39130 |         |          |   |         |          |          |   |         |          |         |   |         |          |          |   |         |          |          |   |         |          |          |   |         |          |         |   |         |         |          |   |         |          |          |   |         |          |         |   |         |          |          |   |         |          |         |   |         |          |         |   |         |         |          |   |          |         |         |   |          |         |         |   |         |         |         |   |         |         |         |   |         |         |         |   |         |         |         |   |         |         |          |   |         |         |          |   |          |         |         |   |          |         |         |   |          |         |         |   |          |         |         |
| H                                              | 1.07937                                                                                                                                                                                                                                                                                                                                                                                                                                                                                                                                                                                                                                                                                                                                                                                                                                                                                                                                                                                                                                                                                                                                                                                                                                                                                                                                                                                                                                                                                                                                                                                                                                                                                                                                                                                                                                                                                                                                                     | -1.07725 | 0.40271  |         |          |   |         |          |          |   |         |          |         |   |         |          |          |   |         |          |          |   |         |          |          |   |         |          |         |   |         |         |          |   |         |          |          |   |         |          |         |   |         |          |          |   |         |          |         |   |         |          |         |   |         |         |          |   |          |         |         |   |          |         |         |   |         |         |         |   |         |         |         |   |         |         |         |   |         |         |         |   |         |         |          |   |         |         |          |   |          |         |         |   |          |         |         |   |          |         |         |   |          |         |         |
| H                                              | 2.96660                                                                                                                                                                                                                                                                                                                                                                                                                                                                                                                                                                                                                                                                                                                                                                                                                                                                                                                                                                                                                                                                                                                                                                                                                                                                                                                                                                                                                                                                                                                                                                                                                                                                                                                                                                                                                                                                                                                                                     | 0.45744  | -0.37413 |         |          |   |         |          |          |   |         |          |         |   |         |          |          |   |         |          |          |   |         |          |          |   |         |          |         |   |         |         |          |   |         |          |          |   |         |          |         |   |         |          |          |   |         |          |         |   |         |          |         |   |         |         |          |   |          |         |         |   |          |         |         |   |         |         |         |   |         |         |         |   |         |         |         |   |         |         |         |   |         |         |          |   |         |         |          |   |          |         |         |   |          |         |         |   |          |         |         |   |          |         |         |
| H                                              | 4.98327                                                                                                                                                                                                                                                                                                                                                                                                                                                                                                                                                                                                                                                                                                                                                                                                                                                                                                                                                                                                                                                                                                                                                                                                                                                                                                                                                                                                                                                                                                                                                                                                                                                                                                                                                                                                                                                                                                                                                     | -0.94051 | -1.19458 |         |          |   |         |          |          |   |         |          |         |   |         |          |          |   |         |          |          |   |         |          |          |   |         |          |         |   |         |         |          |   |         |          |          |   |         |          |         |   |         |          |          |   |         |          |         |   |         |          |         |   |         |         |          |   |          |         |         |   |          |         |         |   |         |         |         |   |         |         |         |   |         |         |         |   |         |         |         |   |         |         |          |   |         |         |          |   |          |         |         |   |          |         |         |   |          |         |         |   |          |         |         |
| C                                              | 1.82274                                                                                                                                                                                                                                                                                                                                                                                                                                                                                                                                                                                                                                                                                                                                                                                                                                                                                                                                                                                                                                                                                                                                                                                                                                                                                                                                                                                                                                                                                                                                                                                                                                                                                                                                                                                                                                                                                                                                                     | -4.06582 | 0.14766  |         |          |   |         |          |          |   |         |          |         |   |         |          |          |   |         |          |          |   |         |          |          |   |         |          |         |   |         |         |          |   |         |          |          |   |         |          |         |   |         |          |          |   |         |          |         |   |         |          |         |   |         |         |          |   |          |         |         |   |          |         |         |   |         |         |         |   |         |         |         |   |         |         |         |   |         |         |         |   |         |         |          |   |         |         |          |   |          |         |         |   |          |         |         |   |          |         |         |   |          |         |         |
| H                                              | 1.77963                                                                                                                                                                                                                                                                                                                                                                                                                                                                                                                                                                                                                                                                                                                                                                                                                                                                                                                                                                                                                                                                                                                                                                                                                                                                                                                                                                                                                                                                                                                                                                                                                                                                                                                                                                                                                                                                                                                                                     | -4.68204 | -0.75775 |         |          |   |         |          |          |   |         |          |         |   |         |          |          |   |         |          |          |   |         |          |          |   |         |          |         |   |         |         |          |   |         |          |          |   |         |          |         |   |         |          |          |   |         |          |         |   |         |          |         |   |         |         |          |   |          |         |         |   |          |         |         |   |         |         |         |   |         |         |         |   |         |         |         |   |         |         |         |   |         |         |          |   |         |         |          |   |          |         |         |   |          |         |         |   |          |         |         |   |          |         |         |
| H                                              | 2.38435                                                                                                                                                                                                                                                                                                                                                                                                                                                                                                                                                                                                                                                                                                                                                                                                                                                                                                                                                                                                                                                                                                                                                                                                                                                                                                                                                                                                                                                                                                                                                                                                                                                                                                                                                                                                                                                                                                                                                     | -4.62297 | 0.90682  |         |          |   |         |          |          |   |         |          |         |   |         |          |          |   |         |          |          |   |         |          |          |   |         |          |         |   |         |         |          |   |         |          |          |   |         |          |         |   |         |          |          |   |         |          |         |   |         |          |         |   |         |         |          |   |          |         |         |   |          |         |         |   |         |         |         |   |         |         |         |   |         |         |         |   |         |         |         |   |         |         |          |   |         |         |          |   |          |         |         |   |          |         |         |   |          |         |         |   |          |         |         |
| H                                              | 0.80290                                                                                                                                                                                                                                                                                                                                                                                                                                                                                                                                                                                                                                                                                                                                                                                                                                                                                                                                                                                                                                                                                                                                                                                                                                                                                                                                                                                                                                                                                                                                                                                                                                                                                                                                                                                                                                                                                                                                                     | -3.91412 | 0.51220  |         |          |   |         |          |          |   |         |          |         |   |         |          |          |   |         |          |          |   |         |          |          |   |         |          |         |   |         |         |          |   |         |          |          |   |         |          |         |   |         |          |          |   |         |          |         |   |         |          |         |   |         |         |          |   |          |         |         |   |          |         |         |   |         |         |         |   |         |         |         |   |         |         |         |   |         |         |         |   |         |         |          |   |         |         |          |   |          |         |         |   |          |         |         |   |          |         |         |   |          |         |         |
| C                                              | 1.68106                                                                                                                                                                                                                                                                                                                                                                                                                                                                                                                                                                                                                                                                                                                                                                                                                                                                                                                                                                                                                                                                                                                                                                                                                                                                                                                                                                                                                                                                                                                                                                                                                                                                                                                                                                                                                                                                                                                                                     | 2.57194  | -0.96508 |         |          |   |         |          |          |   |         |          |         |   |         |          |          |   |         |          |          |   |         |          |          |   |         |          |         |   |         |         |          |   |         |          |          |   |         |          |         |   |         |          |          |   |         |          |         |   |         |          |         |   |         |         |          |   |          |         |         |   |          |         |         |   |         |         |         |   |         |         |         |   |         |         |         |   |         |         |         |   |         |         |          |   |         |         |          |   |          |         |         |   |          |         |         |   |          |         |         |   |          |         |         |
| C                                              | -0.52484                                                                                                                                                                                                                                                                                                                                                                                                                                                                                                                                                                                                                                                                                                                                                                                                                                                                                                                                                                                                                                                                                                                                                                                                                                                                                                                                                                                                                                                                                                                                                                                                                                                                                                                                                                                                                                                                                                                                                    | 2.20264  | 0.24185  |         |          |   |         |          |          |   |         |          |         |   |         |          |          |   |         |          |          |   |         |          |          |   |         |          |         |   |         |         |          |   |         |          |          |   |         |          |         |   |         |          |          |   |         |          |         |   |         |          |         |   |         |         |          |   |          |         |         |   |          |         |         |   |         |         |         |   |         |         |         |   |         |         |         |   |         |         |         |   |         |         |          |   |         |         |          |   |          |         |         |   |          |         |         |   |          |         |         |   |          |         |         |
| O                                              | -1.63650                                                                                                                                                                                                                                                                                                                                                                                                                                                                                                                                                                                                                                                                                                                                                                                                                                                                                                                                                                                                                                                                                                                                                                                                                                                                                                                                                                                                                                                                                                                                                                                                                                                                                                                                                                                                                                                                                                                                                    | 1.62021  | 0.47802  |         |          |   |         |          |          |   |         |          |         |   |         |          |          |   |         |          |          |   |         |          |          |   |         |          |         |   |         |         |          |   |         |          |          |   |         |          |         |   |         |          |          |   |         |          |         |   |         |          |         |   |         |         |          |   |          |         |         |   |          |         |         |   |         |         |         |   |         |         |         |   |         |         |         |   |         |         |         |   |         |         |          |   |         |         |          |   |          |         |         |   |          |         |         |   |          |         |         |   |          |         |         |
| C                                              | 2.92778                                                                                                                                                                                                                                                                                                                                                                                                                                                                                                                                                                                                                                                                                                                                                                                                                                                                                                                                                                                                                                                                                                                                                                                                                                                                                                                                                                                                                                                                                                                                                                                                                                                                                                                                                                                                                                                                                                                                                     | 2.38447  | 1.13544  |         |          |   |         |          |          |   |         |          |         |   |         |          |          |   |         |          |          |   |         |          |          |   |         |          |         |   |         |         |          |   |         |          |          |   |         |          |         |   |         |          |          |   |         |          |         |   |         |          |         |   |         |         |          |   |          |         |         |   |          |         |         |   |         |         |         |   |         |         |         |   |         |         |         |   |         |         |         |   |         |         |          |   |         |         |          |   |          |         |         |   |          |         |         |   |          |         |         |   |          |         |         |
| H                                              | 2.96811                                                                                                                                                                                                                                                                                                                                                                                                                                                                                                                                                                                                                                                                                                                                                                                                                                                                                                                                                                                                                                                                                                                                                                                                                                                                                                                                                                                                                                                                                                                                                                                                                                                                                                                                                                                                                                                                                                                                                     | 3.47189  | 1.28100  |         |          |   |         |          |          |   |         |          |         |   |         |          |          |   |         |          |          |   |         |          |          |   |         |          |         |   |         |         |          |   |         |          |          |   |         |          |         |   |         |          |          |   |         |          |         |   |         |          |         |   |         |         |          |   |          |         |         |   |          |         |         |   |         |         |         |   |         |         |         |   |         |         |         |   |         |         |         |   |         |         |          |   |         |         |          |   |          |         |         |   |          |         |         |   |          |         |         |   |          |         |         |
| H                                              | 2.03362                                                                                                                                                                                                                                                                                                                                                                                                                                                                                                                                                                                                                                                                                                                                                                                                                                                                                                                                                                                                                                                                                                                                                                                                                                                                                                                                                                                                                                                                                                                                                                                                                                                                                                                                                                                                                                                                                                                                                     | 1.99682  | 1.63815  |         |          |   |         |          |          |   |         |          |         |   |         |          |          |   |         |          |          |   |         |          |          |   |         |          |         |   |         |         |          |   |         |          |          |   |         |          |         |   |         |          |          |   |         |          |         |   |         |          |         |   |         |         |          |   |          |         |         |   |          |         |         |   |         |         |         |   |         |         |         |   |         |         |         |   |         |         |         |   |         |         |          |   |         |         |          |   |          |         |         |   |          |         |         |   |          |         |         |   |          |         |         |
| H                                              | 3.82381                                                                                                                                                                                                                                                                                                                                                                                                                                                                                                                                                                                                                                                                                                                                                                                                                                                                                                                                                                                                                                                                                                                                                                                                                                                                                                                                                                                                                                                                                                                                                                                                                                                                                                                                                                                                                                                                                                                                                     | 1.93232  | 1.57203  |         |          |   |         |          |          |   |         |          |         |   |         |          |          |   |         |          |          |   |         |          |          |   |         |          |         |   |         |         |          |   |         |          |          |   |         |          |         |   |         |          |          |   |         |          |         |   |         |          |         |   |         |         |          |   |          |         |         |   |          |         |         |   |         |         |         |   |         |         |         |   |         |         |         |   |         |         |         |   |         |         |          |   |         |         |          |   |          |         |         |   |          |         |         |   |          |         |         |   |          |         |         |
| C                                              | 0.45817                                                                                                                                                                                                                                                                                                                                                                                                                                                                                                                                                                                                                                                                                                                                                                                                                                                                                                                                                                                                                                                                                                                                                                                                                                                                                                                                                                                                                                                                                                                                                                                                                                                                                                                                                                                                                                                                                                                                                     | 1.80719  | -0.64705 |         |          |   |         |          |          |   |         |          |         |   |         |          |          |   |         |          |          |   |         |          |          |   |         |          |         |   |         |         |          |   |         |          |          |   |         |          |         |   |         |          |          |   |         |          |         |   |         |          |         |   |         |         |          |   |          |         |         |   |          |         |         |   |         |         |         |   |         |         |         |   |         |         |         |   |         |         |         |   |         |         |          |   |         |         |          |   |          |         |         |   |          |         |         |   |          |         |         |   |          |         |         |
| H                                              | 0.23817                                                                                                                                                                                                                                                                                                                                                                                                                                                                                                                                                                                                                                                                                                                                                                                                                                                                                                                                                                                                                                                                                                                                                                                                                                                                                                                                                                                                                                                                                                                                                                                                                                                                                                                                                                                                                                                                                                                                                     | 0.92567  | -1.24514 |         |          |   |         |          |          |   |         |          |         |   |         |          |          |   |         |          |          |   |         |          |          |   |         |          |         |   |         |         |          |   |         |          |          |   |         |          |         |   |         |          |          |   |         |          |         |   |         |          |         |   |         |         |          |   |          |         |         |   |          |         |         |   |         |         |         |   |         |         |         |   |         |         |         |   |         |         |         |   |         |         |          |   |         |         |          |   |          |         |         |   |          |         |         |   |          |         |         |   |          |         |         |
| O                                              | -0.25926                                                                                                                                                                                                                                                                                                                                                                                                                                                                                                                                                                                                                                                                                                                                                                                                                                                                                                                                                                                                                                                                                                                                                                                                                                                                                                                                                                                                                                                                                                                                                                                                                                                                                                                                                                                                                                                                                                                                                    | 3.37480  | 0.94641  |         |          |   |         |          |          |   |         |          |         |   |         |          |          |   |         |          |          |   |         |          |          |   |         |          |         |   |         |         |          |   |         |          |          |   |         |          |         |   |         |          |          |   |         |          |         |   |         |          |         |   |         |         |          |   |          |         |         |   |          |         |         |   |         |         |         |   |         |         |         |   |         |         |         |   |         |         |         |   |         |         |          |   |         |         |          |   |          |         |         |   |          |         |         |   |          |         |         |   |          |         |         |
| C                                              | -1.29149                                                                                                                                                                                                                                                                                                                                                                                                                                                                                                                                                                                                                                                                                                                                                                                                                                                                                                                                                                                                                                                                                                                                                                                                                                                                                                                                                                                                                                                                                                                                                                                                                                                                                                                                                                                                                                                                                                                                                    | 3.83243  | 1.81267  |         |          |   |         |          |          |   |         |          |         |   |         |          |          |   |         |          |          |   |         |          |          |   |         |          |         |   |         |         |          |   |         |          |          |   |         |          |         |   |         |          |          |   |         |          |         |   |         |          |         |   |         |         |          |   |          |         |         |   |          |         |         |   |         |         |         |   |         |         |         |   |         |         |         |   |         |         |         |   |         |         |          |   |         |         |          |   |          |         |         |   |          |         |         |   |          |         |         |   |          |         |         |
| H                                              | -0.91398                                                                                                                                                                                                                                                                                                                                                                                                                                                                                                                                                                                                                                                                                                                                                                                                                                                                                                                                                                                                                                                                                                                                                                                                                                                                                                                                                                                                                                                                                                                                                                                                                                                                                                                                                                                                                                                                                                                                                    | 4.75575  | 2.25987  |         |          |   |         |          |          |   |         |          |         |   |         |          |          |   |         |          |          |   |         |          |          |   |         |          |         |   |         |         |          |   |         |          |          |   |         |          |         |   |         |          |          |   |         |          |         |   |         |          |         |   |         |         |          |   |          |         |         |   |          |         |         |   |         |         |         |   |         |         |         |   |         |         |         |   |         |         |         |   |         |         |          |   |         |         |          |   |          |         |         |   |          |         |         |   |          |         |         |   |          |         |         |
| H                                              | -1.51231                                                                                                                                                                                                                                                                                                                                                                                                                                                                                                                                                                                                                                                                                                                                                                                                                                                                                                                                                                                                                                                                                                                                                                                                                                                                                                                                                                                                                                                                                                                                                                                                                                                                                                                                                                                                                                                                                                                                                    | 3.10567  | 2.60216  |         |          |   |         |          |          |   |         |          |         |   |         |          |          |   |         |          |          |   |         |          |          |   |         |          |         |   |         |         |          |   |         |          |          |   |         |          |         |   |         |          |          |   |         |          |         |   |         |          |         |   |         |         |          |   |          |         |         |   |          |         |         |   |         |         |         |   |         |         |         |   |         |         |         |   |         |         |         |   |         |         |          |   |         |         |          |   |          |         |         |   |          |         |         |   |          |         |         |   |          |         |         |



|   |          |          |          |
|---|----------|----------|----------|
| H | -2.21924 | 4.04007  | 1.26854  |
| C | 2.07725  | 2.52818  | -2.43869 |
| H | 1.59054  | 3.61154  | -0.63197 |
| H | 1.30466  | 3.01279  | -3.04382 |
| H | 3.03088  | 3.03880  | -2.61098 |
| H | 2.17233  | 1.49252  | -2.78863 |
| C | -1.57167 | -2.06909 | 0.84136  |
| O | -1.26957 | -3.21412 | 1.20715  |
| C | -2.08573 | -1.85049 | -0.58803 |
| N | -2.74459 | -0.59030 | -0.85552 |
| H | -2.28288 | 0.28258  | -0.56832 |
| H | -2.79653 | -2.65034 | -0.80497 |
| H | -1.22547 | -1.99700 | -1.25829 |
| N | -1.42220 | -0.98784 | 1.63329  |
| H | -1.59394 | -0.03866 | 1.27840  |
| C | -0.94306 | -1.13229 | 2.99918  |
| H | 0.09198  | -1.49397 | 3.03030  |
| H | -0.99331 | -0.15715 | 3.48778  |
| H | -1.56282 | -1.84462 | 3.55271  |
| C | -4.01841 | -0.53224 | -1.32911 |
| O | -4.68034 | -1.52702 | -1.63812 |
| C | -4.57356 | 0.87669  | -1.47763 |
| H | -4.68529 | 1.10922  | -2.54269 |
| H | -5.57116 | 0.91119  | -1.02952 |
| H | -3.93629 | 1.63227  | -1.01056 |
| H | 4.35246  | -3.39188 | -0.90321 |

Optimized Molecular Properties for **T6-TS2**

|                                                |                                                                                                                                                                                                                                                                                                                                                                                                                                                                                                                                                                                                                                                                                                                                                                                                                                                                                                                                                                                                                                                                                                                                                                                                                                                                                                                                                                                                                                                                                                                                                                                                                                                                                                                                                                                                                                                                                                                                                                          |          |          |          |          |   |         |         |          |   |         |         |         |   |         |         |          |   |         |          |          |   |         |          |          |   |         |         |         |   |         |          |          |   |          |          |          |   |          |         |          |   |         |          |         |   |         |          |          |   |          |          |         |   |          |          |         |   |          |          |         |   |          |          |         |   |          |          |         |   |          |          |         |   |          |          |         |   |          |          |         |   |         |          |         |   |          |          |          |   |          |          |          |   |         |          |          |   |          |         |          |   |          |         |          |
|------------------------------------------------|--------------------------------------------------------------------------------------------------------------------------------------------------------------------------------------------------------------------------------------------------------------------------------------------------------------------------------------------------------------------------------------------------------------------------------------------------------------------------------------------------------------------------------------------------------------------------------------------------------------------------------------------------------------------------------------------------------------------------------------------------------------------------------------------------------------------------------------------------------------------------------------------------------------------------------------------------------------------------------------------------------------------------------------------------------------------------------------------------------------------------------------------------------------------------------------------------------------------------------------------------------------------------------------------------------------------------------------------------------------------------------------------------------------------------------------------------------------------------------------------------------------------------------------------------------------------------------------------------------------------------------------------------------------------------------------------------------------------------------------------------------------------------------------------------------------------------------------------------------------------------------------------------------------------------------------------------------------------------|----------|----------|----------|----------|---|---------|---------|----------|---|---------|---------|---------|---|---------|---------|----------|---|---------|----------|----------|---|---------|----------|----------|---|---------|---------|---------|---|---------|----------|----------|---|----------|----------|----------|---|----------|---------|----------|---|---------|----------|---------|---|---------|----------|----------|---|----------|----------|---------|---|----------|----------|---------|---|----------|----------|---------|---|----------|----------|---------|---|----------|----------|---------|---|----------|----------|---------|---|----------|----------|---------|---|----------|----------|---------|---|---------|----------|---------|---|----------|----------|----------|---|----------|----------|----------|---|---------|----------|----------|---|----------|---------|----------|---|----------|---------|----------|
| Number of<br>(-)<br>Vibrational<br>Frequencies | 1 (-22.182)                                                                                                                                                                                                                                                                                                                                                                                                                                                                                                                                                                                                                                                                                                                                                                                                                                                                                                                                                                                                                                                                                                                                                                                                                                                                                                                                                                                                                                                                                                                                                                                                                                                                                                                                                                                                                                                                                                                                                              |          |          |          |          |   |         |         |          |   |         |         |         |   |         |         |          |   |         |          |          |   |         |          |          |   |         |         |         |   |         |          |          |   |          |          |          |   |          |         |          |   |         |          |         |   |         |          |          |   |          |          |         |   |          |          |         |   |          |          |         |   |          |          |         |   |          |          |         |   |          |          |         |   |          |          |         |   |          |          |         |   |         |          |         |   |          |          |          |   |          |          |          |   |         |          |          |   |          |         |          |   |          |         |          |
| Absolute<br>Energies<br>(Hartrees)             | <p><b>B3LYP/6-31G(d) (PCM)</b></p> <p>There are 21 positive frequencies below 100 cm<sup>-1</sup>.</p> <p>Zero-point correction: 0.607177 hartree<br/>         Enthalpy correction: 0.649693 hartree<br/>         Free Energy correction: 0.528799 hartree<br/>         Quasiharmonic Free Energy correction: 0.542493 hartree</p> <p>SCF Energy: -1644.892367 hartree<br/>         SCF Energy + ZPVE: -1644.285190 hartree<br/>         Enthalpy: -1644.242674 hartree<br/>         Free Energy: -1644.363568 hartree</p> <p>Free Energy with quasiharmonic correction: -1644.349874 hartree<br/>         (correction: 8.59 kcal/mol)</p> <p><b>B3LYP-D3/6-311+G(d,p) (PCM)</b></p> <p>SCF Done: E(RB3LYP) = -1645.48648611 A.U.</p>                                                                                                                                                                                                                                                                                                                                                                                                                                                                                                                                                                                                                                                                                                                                                                                                                                                                                                                                                                                                                                                                                                                                                                                                                                    |          |          |          |          |   |         |         |          |   |         |         |         |   |         |         |          |   |         |          |          |   |         |          |          |   |         |         |         |   |         |          |          |   |          |          |          |   |          |         |          |   |         |          |         |   |         |          |          |   |          |          |         |   |          |          |         |   |          |          |         |   |          |          |         |   |          |          |         |   |          |          |         |   |          |          |         |   |          |          |         |   |         |          |         |   |          |          |          |   |          |          |          |   |         |          |          |   |          |         |          |   |          |         |          |
| Cartesian<br>Coordinates                       | <p>(PCM)<br/>72<br/>spD3-TS2-T6.out Energy: -1032558.3511456</p> <table> <tr><td>O</td><td>2.65024</td><td>-2.87572</td><td>-0.41539</td></tr> <tr><td>C</td><td>5.04163</td><td>1.35067</td><td>-0.38572</td></tr> <tr><td>C</td><td>4.14640</td><td>0.42871</td><td>0.08689</td></tr> <tr><td>N</td><td>5.53787</td><td>0.81293</td><td>-1.56768</td></tr> <tr><td>C</td><td>4.97148</td><td>-0.37897</td><td>-1.80173</td></tr> <tr><td>N</td><td>4.12599</td><td>-0.62574</td><td>-0.80757</td></tr> <tr><td>C</td><td>5.48034</td><td>2.67254</td><td>0.14757</td></tr> <tr><td>C</td><td>1.30480</td><td>-2.76972</td><td>-0.99497</td></tr> <tr><td>C</td><td>-0.32418</td><td>-0.83835</td><td>-1.32641</td></tr> <tr><td>O</td><td>-0.75454</td><td>0.33335</td><td>-1.20324</td></tr> <tr><td>C</td><td>2.73077</td><td>-3.13291</td><td>0.98920</td></tr> <tr><td>C</td><td>0.62640</td><td>-1.49771</td><td>-0.53604</td></tr> <tr><td>C</td><td>-0.88064</td><td>-1.33412</td><td>1.68539</td></tr> <tr><td>C</td><td>-2.19012</td><td>-1.84373</td><td>1.23781</td></tr> <tr><td>O</td><td>-0.65782</td><td>-0.13429</td><td>1.93774</td></tr> <tr><td>C</td><td>-3.19715</td><td>-0.97084</td><td>0.79505</td></tr> <tr><td>C</td><td>-2.46476</td><td>-3.21829</td><td>1.32409</td></tr> <tr><td>C</td><td>-4.44542</td><td>-1.46908</td><td>0.42811</td></tr> <tr><td>C</td><td>-3.71577</td><td>-3.71480</td><td>0.96623</td></tr> <tr><td>C</td><td>-4.70852</td><td>-2.84010</td><td>0.51275</td></tr> <tr><td>H</td><td>1.18004</td><td>-0.86683</td><td>0.14654</td></tr> <tr><td>O</td><td>-0.82697</td><td>-1.64792</td><td>-2.34928</td></tr> <tr><td>C</td><td>-1.79950</td><td>-1.05509</td><td>-3.20060</td></tr> <tr><td>C</td><td>0.52342</td><td>-4.06872</td><td>-0.78154</td></tr> <tr><td>C</td><td>-3.41555</td><td>3.04804</td><td>-0.14121</td></tr> <tr><td>O</td><td>-4.48308</td><td>3.66831</td><td>-0.12300</td></tr> </table> | O        | 2.65024  | -2.87572 | -0.41539 | C | 5.04163 | 1.35067 | -0.38572 | C | 4.14640 | 0.42871 | 0.08689 | N | 5.53787 | 0.81293 | -1.56768 | C | 4.97148 | -0.37897 | -1.80173 | N | 4.12599 | -0.62574 | -0.80757 | C | 5.48034 | 2.67254 | 0.14757 | C | 1.30480 | -2.76972 | -0.99497 | C | -0.32418 | -0.83835 | -1.32641 | O | -0.75454 | 0.33335 | -1.20324 | C | 2.73077 | -3.13291 | 0.98920 | C | 0.62640 | -1.49771 | -0.53604 | C | -0.88064 | -1.33412 | 1.68539 | C | -2.19012 | -1.84373 | 1.23781 | O | -0.65782 | -0.13429 | 1.93774 | C | -3.19715 | -0.97084 | 0.79505 | C | -2.46476 | -3.21829 | 1.32409 | C | -4.44542 | -1.46908 | 0.42811 | C | -3.71577 | -3.71480 | 0.96623 | C | -4.70852 | -2.84010 | 0.51275 | H | 1.18004 | -0.86683 | 0.14654 | O | -0.82697 | -1.64792 | -2.34928 | C | -1.79950 | -1.05509 | -3.20060 | C | 0.52342 | -4.06872 | -0.78154 | C | -3.41555 | 3.04804 | -0.14121 | O | -4.48308 | 3.66831 | -0.12300 |
| O                                              | 2.65024                                                                                                                                                                                                                                                                                                                                                                                                                                                                                                                                                                                                                                                                                                                                                                                                                                                                                                                                                                                                                                                                                                                                                                                                                                                                                                                                                                                                                                                                                                                                                                                                                                                                                                                                                                                                                                                                                                                                                                  | -2.87572 | -0.41539 |          |          |   |         |         |          |   |         |         |         |   |         |         |          |   |         |          |          |   |         |          |          |   |         |         |         |   |         |          |          |   |          |          |          |   |          |         |          |   |         |          |         |   |         |          |          |   |          |          |         |   |          |          |         |   |          |          |         |   |          |          |         |   |          |          |         |   |          |          |         |   |          |          |         |   |          |          |         |   |         |          |         |   |          |          |          |   |          |          |          |   |         |          |          |   |          |         |          |   |          |         |          |
| C                                              | 5.04163                                                                                                                                                                                                                                                                                                                                                                                                                                                                                                                                                                                                                                                                                                                                                                                                                                                                                                                                                                                                                                                                                                                                                                                                                                                                                                                                                                                                                                                                                                                                                                                                                                                                                                                                                                                                                                                                                                                                                                  | 1.35067  | -0.38572 |          |          |   |         |         |          |   |         |         |         |   |         |         |          |   |         |          |          |   |         |          |          |   |         |         |         |   |         |          |          |   |          |          |          |   |          |         |          |   |         |          |         |   |         |          |          |   |          |          |         |   |          |          |         |   |          |          |         |   |          |          |         |   |          |          |         |   |          |          |         |   |          |          |         |   |          |          |         |   |         |          |         |   |          |          |          |   |          |          |          |   |         |          |          |   |          |         |          |   |          |         |          |
| C                                              | 4.14640                                                                                                                                                                                                                                                                                                                                                                                                                                                                                                                                                                                                                                                                                                                                                                                                                                                                                                                                                                                                                                                                                                                                                                                                                                                                                                                                                                                                                                                                                                                                                                                                                                                                                                                                                                                                                                                                                                                                                                  | 0.42871  | 0.08689  |          |          |   |         |         |          |   |         |         |         |   |         |         |          |   |         |          |          |   |         |          |          |   |         |         |         |   |         |          |          |   |          |          |          |   |          |         |          |   |         |          |         |   |         |          |          |   |          |          |         |   |          |          |         |   |          |          |         |   |          |          |         |   |          |          |         |   |          |          |         |   |          |          |         |   |          |          |         |   |         |          |         |   |          |          |          |   |          |          |          |   |         |          |          |   |          |         |          |   |          |         |          |
| N                                              | 5.53787                                                                                                                                                                                                                                                                                                                                                                                                                                                                                                                                                                                                                                                                                                                                                                                                                                                                                                                                                                                                                                                                                                                                                                                                                                                                                                                                                                                                                                                                                                                                                                                                                                                                                                                                                                                                                                                                                                                                                                  | 0.81293  | -1.56768 |          |          |   |         |         |          |   |         |         |         |   |         |         |          |   |         |          |          |   |         |          |          |   |         |         |         |   |         |          |          |   |          |          |          |   |          |         |          |   |         |          |         |   |         |          |          |   |          |          |         |   |          |          |         |   |          |          |         |   |          |          |         |   |          |          |         |   |          |          |         |   |          |          |         |   |          |          |         |   |         |          |         |   |          |          |          |   |          |          |          |   |         |          |          |   |          |         |          |   |          |         |          |
| C                                              | 4.97148                                                                                                                                                                                                                                                                                                                                                                                                                                                                                                                                                                                                                                                                                                                                                                                                                                                                                                                                                                                                                                                                                                                                                                                                                                                                                                                                                                                                                                                                                                                                                                                                                                                                                                                                                                                                                                                                                                                                                                  | -0.37897 | -1.80173 |          |          |   |         |         |          |   |         |         |         |   |         |         |          |   |         |          |          |   |         |          |          |   |         |         |         |   |         |          |          |   |          |          |          |   |          |         |          |   |         |          |         |   |         |          |          |   |          |          |         |   |          |          |         |   |          |          |         |   |          |          |         |   |          |          |         |   |          |          |         |   |          |          |         |   |          |          |         |   |         |          |         |   |          |          |          |   |          |          |          |   |         |          |          |   |          |         |          |   |          |         |          |
| N                                              | 4.12599                                                                                                                                                                                                                                                                                                                                                                                                                                                                                                                                                                                                                                                                                                                                                                                                                                                                                                                                                                                                                                                                                                                                                                                                                                                                                                                                                                                                                                                                                                                                                                                                                                                                                                                                                                                                                                                                                                                                                                  | -0.62574 | -0.80757 |          |          |   |         |         |          |   |         |         |         |   |         |         |          |   |         |          |          |   |         |          |          |   |         |         |         |   |         |          |          |   |          |          |          |   |          |         |          |   |         |          |         |   |         |          |          |   |          |          |         |   |          |          |         |   |          |          |         |   |          |          |         |   |          |          |         |   |          |          |         |   |          |          |         |   |          |          |         |   |         |          |         |   |          |          |          |   |          |          |          |   |         |          |          |   |          |         |          |   |          |         |          |
| C                                              | 5.48034                                                                                                                                                                                                                                                                                                                                                                                                                                                                                                                                                                                                                                                                                                                                                                                                                                                                                                                                                                                                                                                                                                                                                                                                                                                                                                                                                                                                                                                                                                                                                                                                                                                                                                                                                                                                                                                                                                                                                                  | 2.67254  | 0.14757  |          |          |   |         |         |          |   |         |         |         |   |         |         |          |   |         |          |          |   |         |          |          |   |         |         |         |   |         |          |          |   |          |          |          |   |          |         |          |   |         |          |         |   |         |          |          |   |          |          |         |   |          |          |         |   |          |          |         |   |          |          |         |   |          |          |         |   |          |          |         |   |          |          |         |   |          |          |         |   |         |          |         |   |          |          |          |   |          |          |          |   |         |          |          |   |          |         |          |   |          |         |          |
| C                                              | 1.30480                                                                                                                                                                                                                                                                                                                                                                                                                                                                                                                                                                                                                                                                                                                                                                                                                                                                                                                                                                                                                                                                                                                                                                                                                                                                                                                                                                                                                                                                                                                                                                                                                                                                                                                                                                                                                                                                                                                                                                  | -2.76972 | -0.99497 |          |          |   |         |         |          |   |         |         |         |   |         |         |          |   |         |          |          |   |         |          |          |   |         |         |         |   |         |          |          |   |          |          |          |   |          |         |          |   |         |          |         |   |         |          |          |   |          |          |         |   |          |          |         |   |          |          |         |   |          |          |         |   |          |          |         |   |          |          |         |   |          |          |         |   |          |          |         |   |         |          |         |   |          |          |          |   |          |          |          |   |         |          |          |   |          |         |          |   |          |         |          |
| C                                              | -0.32418                                                                                                                                                                                                                                                                                                                                                                                                                                                                                                                                                                                                                                                                                                                                                                                                                                                                                                                                                                                                                                                                                                                                                                                                                                                                                                                                                                                                                                                                                                                                                                                                                                                                                                                                                                                                                                                                                                                                                                 | -0.83835 | -1.32641 |          |          |   |         |         |          |   |         |         |         |   |         |         |          |   |         |          |          |   |         |          |          |   |         |         |         |   |         |          |          |   |          |          |          |   |          |         |          |   |         |          |         |   |         |          |          |   |          |          |         |   |          |          |         |   |          |          |         |   |          |          |         |   |          |          |         |   |          |          |         |   |          |          |         |   |          |          |         |   |         |          |         |   |          |          |          |   |          |          |          |   |         |          |          |   |          |         |          |   |          |         |          |
| O                                              | -0.75454                                                                                                                                                                                                                                                                                                                                                                                                                                                                                                                                                                                                                                                                                                                                                                                                                                                                                                                                                                                                                                                                                                                                                                                                                                                                                                                                                                                                                                                                                                                                                                                                                                                                                                                                                                                                                                                                                                                                                                 | 0.33335  | -1.20324 |          |          |   |         |         |          |   |         |         |         |   |         |         |          |   |         |          |          |   |         |          |          |   |         |         |         |   |         |          |          |   |          |          |          |   |          |         |          |   |         |          |         |   |         |          |          |   |          |          |         |   |          |          |         |   |          |          |         |   |          |          |         |   |          |          |         |   |          |          |         |   |          |          |         |   |          |          |         |   |         |          |         |   |          |          |          |   |          |          |          |   |         |          |          |   |          |         |          |   |          |         |          |
| C                                              | 2.73077                                                                                                                                                                                                                                                                                                                                                                                                                                                                                                                                                                                                                                                                                                                                                                                                                                                                                                                                                                                                                                                                                                                                                                                                                                                                                                                                                                                                                                                                                                                                                                                                                                                                                                                                                                                                                                                                                                                                                                  | -3.13291 | 0.98920  |          |          |   |         |         |          |   |         |         |         |   |         |         |          |   |         |          |          |   |         |          |          |   |         |         |         |   |         |          |          |   |          |          |          |   |          |         |          |   |         |          |         |   |         |          |          |   |          |          |         |   |          |          |         |   |          |          |         |   |          |          |         |   |          |          |         |   |          |          |         |   |          |          |         |   |          |          |         |   |         |          |         |   |          |          |          |   |          |          |          |   |         |          |          |   |          |         |          |   |          |         |          |
| C                                              | 0.62640                                                                                                                                                                                                                                                                                                                                                                                                                                                                                                                                                                                                                                                                                                                                                                                                                                                                                                                                                                                                                                                                                                                                                                                                                                                                                                                                                                                                                                                                                                                                                                                                                                                                                                                                                                                                                                                                                                                                                                  | -1.49771 | -0.53604 |          |          |   |         |         |          |   |         |         |         |   |         |         |          |   |         |          |          |   |         |          |          |   |         |         |         |   |         |          |          |   |          |          |          |   |          |         |          |   |         |          |         |   |         |          |          |   |          |          |         |   |          |          |         |   |          |          |         |   |          |          |         |   |          |          |         |   |          |          |         |   |          |          |         |   |          |          |         |   |         |          |         |   |          |          |          |   |          |          |          |   |         |          |          |   |          |         |          |   |          |         |          |
| C                                              | -0.88064                                                                                                                                                                                                                                                                                                                                                                                                                                                                                                                                                                                                                                                                                                                                                                                                                                                                                                                                                                                                                                                                                                                                                                                                                                                                                                                                                                                                                                                                                                                                                                                                                                                                                                                                                                                                                                                                                                                                                                 | -1.33412 | 1.68539  |          |          |   |         |         |          |   |         |         |         |   |         |         |          |   |         |          |          |   |         |          |          |   |         |         |         |   |         |          |          |   |          |          |          |   |          |         |          |   |         |          |         |   |         |          |          |   |          |          |         |   |          |          |         |   |          |          |         |   |          |          |         |   |          |          |         |   |          |          |         |   |          |          |         |   |          |          |         |   |         |          |         |   |          |          |          |   |          |          |          |   |         |          |          |   |          |         |          |   |          |         |          |
| C                                              | -2.19012                                                                                                                                                                                                                                                                                                                                                                                                                                                                                                                                                                                                                                                                                                                                                                                                                                                                                                                                                                                                                                                                                                                                                                                                                                                                                                                                                                                                                                                                                                                                                                                                                                                                                                                                                                                                                                                                                                                                                                 | -1.84373 | 1.23781  |          |          |   |         |         |          |   |         |         |         |   |         |         |          |   |         |          |          |   |         |          |          |   |         |         |         |   |         |          |          |   |          |          |          |   |          |         |          |   |         |          |         |   |         |          |          |   |          |          |         |   |          |          |         |   |          |          |         |   |          |          |         |   |          |          |         |   |          |          |         |   |          |          |         |   |          |          |         |   |         |          |         |   |          |          |          |   |          |          |          |   |         |          |          |   |          |         |          |   |          |         |          |
| O                                              | -0.65782                                                                                                                                                                                                                                                                                                                                                                                                                                                                                                                                                                                                                                                                                                                                                                                                                                                                                                                                                                                                                                                                                                                                                                                                                                                                                                                                                                                                                                                                                                                                                                                                                                                                                                                                                                                                                                                                                                                                                                 | -0.13429 | 1.93774  |          |          |   |         |         |          |   |         |         |         |   |         |         |          |   |         |          |          |   |         |          |          |   |         |         |         |   |         |          |          |   |          |          |          |   |          |         |          |   |         |          |         |   |         |          |          |   |          |          |         |   |          |          |         |   |          |          |         |   |          |          |         |   |          |          |         |   |          |          |         |   |          |          |         |   |          |          |         |   |         |          |         |   |          |          |          |   |          |          |          |   |         |          |          |   |          |         |          |   |          |         |          |
| C                                              | -3.19715                                                                                                                                                                                                                                                                                                                                                                                                                                                                                                                                                                                                                                                                                                                                                                                                                                                                                                                                                                                                                                                                                                                                                                                                                                                                                                                                                                                                                                                                                                                                                                                                                                                                                                                                                                                                                                                                                                                                                                 | -0.97084 | 0.79505  |          |          |   |         |         |          |   |         |         |         |   |         |         |          |   |         |          |          |   |         |          |          |   |         |         |         |   |         |          |          |   |          |          |          |   |          |         |          |   |         |          |         |   |         |          |          |   |          |          |         |   |          |          |         |   |          |          |         |   |          |          |         |   |          |          |         |   |          |          |         |   |          |          |         |   |          |          |         |   |         |          |         |   |          |          |          |   |          |          |          |   |         |          |          |   |          |         |          |   |          |         |          |
| C                                              | -2.46476                                                                                                                                                                                                                                                                                                                                                                                                                                                                                                                                                                                                                                                                                                                                                                                                                                                                                                                                                                                                                                                                                                                                                                                                                                                                                                                                                                                                                                                                                                                                                                                                                                                                                                                                                                                                                                                                                                                                                                 | -3.21829 | 1.32409  |          |          |   |         |         |          |   |         |         |         |   |         |         |          |   |         |          |          |   |         |          |          |   |         |         |         |   |         |          |          |   |          |          |          |   |          |         |          |   |         |          |         |   |         |          |          |   |          |          |         |   |          |          |         |   |          |          |         |   |          |          |         |   |          |          |         |   |          |          |         |   |          |          |         |   |          |          |         |   |         |          |         |   |          |          |          |   |          |          |          |   |         |          |          |   |          |         |          |   |          |         |          |
| C                                              | -4.44542                                                                                                                                                                                                                                                                                                                                                                                                                                                                                                                                                                                                                                                                                                                                                                                                                                                                                                                                                                                                                                                                                                                                                                                                                                                                                                                                                                                                                                                                                                                                                                                                                                                                                                                                                                                                                                                                                                                                                                 | -1.46908 | 0.42811  |          |          |   |         |         |          |   |         |         |         |   |         |         |          |   |         |          |          |   |         |          |          |   |         |         |         |   |         |          |          |   |          |          |          |   |          |         |          |   |         |          |         |   |         |          |          |   |          |          |         |   |          |          |         |   |          |          |         |   |          |          |         |   |          |          |         |   |          |          |         |   |          |          |         |   |          |          |         |   |         |          |         |   |          |          |          |   |          |          |          |   |         |          |          |   |          |         |          |   |          |         |          |
| C                                              | -3.71577                                                                                                                                                                                                                                                                                                                                                                                                                                                                                                                                                                                                                                                                                                                                                                                                                                                                                                                                                                                                                                                                                                                                                                                                                                                                                                                                                                                                                                                                                                                                                                                                                                                                                                                                                                                                                                                                                                                                                                 | -3.71480 | 0.96623  |          |          |   |         |         |          |   |         |         |         |   |         |         |          |   |         |          |          |   |         |          |          |   |         |         |         |   |         |          |          |   |          |          |          |   |          |         |          |   |         |          |         |   |         |          |          |   |          |          |         |   |          |          |         |   |          |          |         |   |          |          |         |   |          |          |         |   |          |          |         |   |          |          |         |   |          |          |         |   |         |          |         |   |          |          |          |   |          |          |          |   |         |          |          |   |          |         |          |   |          |         |          |
| C                                              | -4.70852                                                                                                                                                                                                                                                                                                                                                                                                                                                                                                                                                                                                                                                                                                                                                                                                                                                                                                                                                                                                                                                                                                                                                                                                                                                                                                                                                                                                                                                                                                                                                                                                                                                                                                                                                                                                                                                                                                                                                                 | -2.84010 | 0.51275  |          |          |   |         |         |          |   |         |         |         |   |         |         |          |   |         |          |          |   |         |          |          |   |         |         |         |   |         |          |          |   |          |          |          |   |          |         |          |   |         |          |         |   |         |          |          |   |          |          |         |   |          |          |         |   |          |          |         |   |          |          |         |   |          |          |         |   |          |          |         |   |          |          |         |   |          |          |         |   |         |          |         |   |          |          |          |   |          |          |          |   |         |          |          |   |          |         |          |   |          |         |          |
| H                                              | 1.18004                                                                                                                                                                                                                                                                                                                                                                                                                                                                                                                                                                                                                                                                                                                                                                                                                                                                                                                                                                                                                                                                                                                                                                                                                                                                                                                                                                                                                                                                                                                                                                                                                                                                                                                                                                                                                                                                                                                                                                  | -0.86683 | 0.14654  |          |          |   |         |         |          |   |         |         |         |   |         |         |          |   |         |          |          |   |         |          |          |   |         |         |         |   |         |          |          |   |          |          |          |   |          |         |          |   |         |          |         |   |         |          |          |   |          |          |         |   |          |          |         |   |          |          |         |   |          |          |         |   |          |          |         |   |          |          |         |   |          |          |         |   |          |          |         |   |         |          |         |   |          |          |          |   |          |          |          |   |         |          |          |   |          |         |          |   |          |         |          |
| O                                              | -0.82697                                                                                                                                                                                                                                                                                                                                                                                                                                                                                                                                                                                                                                                                                                                                                                                                                                                                                                                                                                                                                                                                                                                                                                                                                                                                                                                                                                                                                                                                                                                                                                                                                                                                                                                                                                                                                                                                                                                                                                 | -1.64792 | -2.34928 |          |          |   |         |         |          |   |         |         |         |   |         |         |          |   |         |          |          |   |         |          |          |   |         |         |         |   |         |          |          |   |          |          |          |   |          |         |          |   |         |          |         |   |         |          |          |   |          |          |         |   |          |          |         |   |          |          |         |   |          |          |         |   |          |          |         |   |          |          |         |   |          |          |         |   |          |          |         |   |         |          |         |   |          |          |          |   |          |          |          |   |         |          |          |   |          |         |          |   |          |         |          |
| C                                              | -1.79950                                                                                                                                                                                                                                                                                                                                                                                                                                                                                                                                                                                                                                                                                                                                                                                                                                                                                                                                                                                                                                                                                                                                                                                                                                                                                                                                                                                                                                                                                                                                                                                                                                                                                                                                                                                                                                                                                                                                                                 | -1.05509 | -3.20060 |          |          |   |         |         |          |   |         |         |         |   |         |         |          |   |         |          |          |   |         |          |          |   |         |         |         |   |         |          |          |   |          |          |          |   |          |         |          |   |         |          |         |   |         |          |          |   |          |          |         |   |          |          |         |   |          |          |         |   |          |          |         |   |          |          |         |   |          |          |         |   |          |          |         |   |          |          |         |   |         |          |         |   |          |          |          |   |          |          |          |   |         |          |          |   |          |         |          |   |          |         |          |
| C                                              | 0.52342                                                                                                                                                                                                                                                                                                                                                                                                                                                                                                                                                                                                                                                                                                                                                                                                                                                                                                                                                                                                                                                                                                                                                                                                                                                                                                                                                                                                                                                                                                                                                                                                                                                                                                                                                                                                                                                                                                                                                                  | -4.06872 | -0.78154 |          |          |   |         |         |          |   |         |         |         |   |         |         |          |   |         |          |          |   |         |          |          |   |         |         |         |   |         |          |          |   |          |          |          |   |          |         |          |   |         |          |         |   |         |          |          |   |          |          |         |   |          |          |         |   |          |          |         |   |          |          |         |   |          |          |         |   |          |          |         |   |          |          |         |   |          |          |         |   |         |          |         |   |          |          |          |   |          |          |          |   |         |          |          |   |          |         |          |   |          |         |          |
| C                                              | -3.41555                                                                                                                                                                                                                                                                                                                                                                                                                                                                                                                                                                                                                                                                                                                                                                                                                                                                                                                                                                                                                                                                                                                                                                                                                                                                                                                                                                                                                                                                                                                                                                                                                                                                                                                                                                                                                                                                                                                                                                 | 3.04804  | -0.14121 |          |          |   |         |         |          |   |         |         |         |   |         |         |          |   |         |          |          |   |         |          |          |   |         |         |         |   |         |          |          |   |          |          |          |   |          |         |          |   |         |          |         |   |         |          |          |   |          |          |         |   |          |          |         |   |          |          |         |   |          |          |         |   |          |          |         |   |          |          |         |   |          |          |         |   |          |          |         |   |         |          |         |   |          |          |          |   |          |          |          |   |         |          |          |   |          |         |          |   |          |         |          |
| O                                              | -4.48308                                                                                                                                                                                                                                                                                                                                                                                                                                                                                                                                                                                                                                                                                                                                                                                                                                                                                                                                                                                                                                                                                                                                                                                                                                                                                                                                                                                                                                                                                                                                                                                                                                                                                                                                                                                                                                                                                                                                                                 | 3.66831  | -0.12300 |          |          |   |         |         |          |   |         |         |         |   |         |         |          |   |         |          |          |   |         |          |          |   |         |         |         |   |         |          |          |   |          |          |          |   |          |         |          |   |         |          |         |   |         |          |          |   |          |          |         |   |          |          |         |   |          |          |         |   |          |          |         |   |          |          |         |   |          |          |         |   |          |          |         |   |          |          |         |   |         |          |         |   |          |          |          |   |          |          |          |   |         |          |          |   |          |         |          |   |          |         |          |

|   |          |          |          |
|---|----------|----------|----------|
| C | -2.47001 | 3.14671  | 1.06809  |
| N | -1.12237 | 2.65787  | 0.88393  |
| C | -0.14487 | 3.45437  | 0.36551  |
| O | -0.32078 | 4.64955  | 0.11742  |
| C | 1.17522  | 2.74681  | 0.11941  |
| N | -3.02008 | 2.25443  | -1.16221 |
| C | -3.84491 | 2.07919  | -2.34436 |
| H | -3.91950 | -4.77950 | 1.04121  |
| H | -5.68515 | -3.22513 | 0.23170  |
| H | -5.21837 | -0.78770 | 0.08272  |
| H | -2.98810 | 0.08953  | 0.73218  |
| H | -1.69245 | -3.89573 | 1.68062  |
| H | -0.40761 | -4.00124 | -1.35024 |
| H | 0.25775  | -4.22345 | 0.26812  |
| H | 1.09458  | -4.93554 | -1.13702 |
| H | 2.25996  | -4.08768 | 1.24419  |
| H | -0.16177 | -2.10487 | 1.99989  |
| H | 2.28278  | -2.32721 | 1.58245  |
| H | 3.79692  | -3.19808 | 1.22574  |
| H | 1.53304  | -2.71834 | -2.06937 |
| H | 3.53079  | -1.49060 | -0.71275 |
| H | 3.51299  | 0.43573  | 0.96743  |
| H | 6.55633  | 2.68259  | 0.35575  |
| H | 5.26505  | 3.48035  | -0.56091 |
| H | 4.95116  | 2.88808  | 1.07812  |
| H | 5.16797  | -1.01761 | -2.64806 |
| H | 1.52934  | 2.24064  | 1.02413  |
| H | 1.91652  | 3.47596  | -0.21319 |
| H | 1.02739  | 1.97558  | -0.64455 |
| H | -0.94462 | 1.66115  | 0.99572  |
| H | -2.43174 | 4.20289  | 1.34286  |
| H | -2.93914 | 2.60423  | 1.89682  |
| H | -2.17020 | 1.69278  | -1.09136 |
| H | -3.20546 | 1.97573  | -3.22534 |
| H | -4.48501 | 1.18953  | -2.27141 |
| H | -1.99633 | -1.78860 | -3.98687 |
| H | -2.72933 | -0.84066 | -2.66323 |
| H | -1.43270 | -0.12436 | -3.64686 |
| H | -4.48633 | 2.95474  | -2.45962 |
| O | 2.02324  | 0.16167  | 2.50331  |
| C | 2.16619  | 0.40086  | 3.89739  |
| H | 3.23665  | 0.45884  | 4.11730  |
| H | 1.73482  | -0.40953 | 4.50254  |
| H | 1.69964  | 1.34737  | 4.20538  |
| H | 6.22016  | 1.25241  | -2.17337 |
| H | 1.05608  | 0.10565  | 2.30169  |

Optimized Molecular Properties for **T6-INT2-1**

|                                                |                                                                                                                                                                                                                                                                                                                                                                                                                                                                                                                                                                                                                                                                                                                                       |                                                                                                                                                                                                                                                                                                                                                                                                                                                                                                                                                                                                                                                                                                                                                                                                                                                                                                                                                                                                                                                                                                                                                 |  |
|------------------------------------------------|---------------------------------------------------------------------------------------------------------------------------------------------------------------------------------------------------------------------------------------------------------------------------------------------------------------------------------------------------------------------------------------------------------------------------------------------------------------------------------------------------------------------------------------------------------------------------------------------------------------------------------------------------------------------------------------------------------------------------------------|-------------------------------------------------------------------------------------------------------------------------------------------------------------------------------------------------------------------------------------------------------------------------------------------------------------------------------------------------------------------------------------------------------------------------------------------------------------------------------------------------------------------------------------------------------------------------------------------------------------------------------------------------------------------------------------------------------------------------------------------------------------------------------------------------------------------------------------------------------------------------------------------------------------------------------------------------------------------------------------------------------------------------------------------------------------------------------------------------------------------------------------------------|--|
| Number of<br>(-)<br>Vibrational<br>Frequencies | 0                                                                                                                                                                                                                                                                                                                                                                                                                                                                                                                                                                                                                                                                                                                                     |                                                                                                                                                                                                                                                                                                                                                                                                                                                                                                                                                                                                                                                                                                                                                                                                                                                                                                                                                                                                                                                                                                                                                 |  |
| Absolute<br>Energies<br>(Hartrees)             | <p><b>B3LYP/6-31G(d) (PCM)</b></p> <p>There are 19 positive frequencies below 100 cm<sup>-1</sup>.</p> <p>Zero-point correction: 0.610290 hartree<br/>         Enthalpy correction: 0.651551 hartree<br/>         Free Energy correction: 0.534803 hartree<br/>         Quasiharmonic Free Energy correction: 0.547012 hartree</p> <p>SCF Energy: -1644.902705 hartree<br/>         SCF Energy + ZPVE: -1644.292415 hartree<br/>         Enthalpy: -1644.251154 hartree<br/>         Free Energy: -1644.367902 hartree</p> <p>Free Energy with quasiharmonic correction: -1644.355693 hartree<br/>         (correction: 7.66 kcal/mol)</p> <p><b>B3LYP-D3/6-311+G(d,p) (PCM)</b></p> <p>SCF Done: E(RB3LYP) = -1645.49919173 A.U.</p> |                                                                                                                                                                                                                                                                                                                                                                                                                                                                                                                                                                                                                                                                                                                                                                                                                                                                                                                                                                                                                                                                                                                                                 |  |
| Cartesian<br>Coordinates                       | (PCM)<br>72                                                                                                                                                                                                                                                                                                                                                                                                                                                                                                                                                                                                                                                                                                                           | <p>spD3-INT2-1-T6.out Energy: -1032566.3240424</p> <p>O 2.65982 -2.74980 -0.01006<br/>         C 4.76989 1.64065 -0.29528<br/>         C 3.90146 0.68918 0.16938<br/>         N 5.35502 1.09024 -1.43020<br/>         C 4.86613 -0.13748 -1.64968<br/>         N 3.98408 -0.39406 -0.68920<br/>         C 5.10776 3.00263 0.20999<br/>         C 1.21248 -2.86008 -0.18835<br/>         C 0.28717 -0.68875 -1.20746<br/>         O -0.61373 0.09644 -1.42232<br/>         C 3.13300 -2.79508 1.34427<br/>         C 0.54310 -1.46598 0.07915<br/>         C -0.61838 -1.33331 1.13950<br/>         C -2.02023 -1.73670 0.64945<br/>         O -0.60513 -0.08413 1.72224<br/>         C -3.11093 -1.36437 1.45013<br/>         C -2.28463 -2.49745 -0.49674<br/>         C -4.41357 -1.74011 1.12379<br/>         C -3.58837 -2.87769 -0.83229<br/>         C -4.66044 -2.50202 -0.02227<br/>         H 1.32802 -0.88396 0.57122<br/>         O 1.25148 -0.92536 -2.13614<br/>         C 1.11740 -0.20655 -3.37650<br/>         C 0.66229 -4.05901 0.58511<br/>         C -4.00264 2.05308 -0.26961<br/>         O -5.20186 2.34315 -0.31842</p> |  |

|   |          |          |          |
|---|----------|----------|----------|
| C | -3.16726 | 2.43581  | 0.96269  |
| N | -1.73424 | 2.27396  | 0.84956  |
| C | -0.96411 | 3.29206  | 0.39218  |
| O | -1.41514 | 4.39669  | 0.06515  |
| C | 0.52163  | 2.98171  | 0.27940  |
| N | -3.34954 | 1.38655  | -1.24573 |
| C | -4.03797 | 0.87343  | -2.41478 |
| H | -3.76252 | -3.46358 | -1.73187 |
| H | -5.67464 | -2.79509 | -0.28095 |
| H | -5.23942 | -1.43548 | 1.76222  |
| H | -2.91299 | -0.76399 | 2.33239  |
| H | -1.47510 | -2.79726 | -1.15788 |
| H | -0.38700 | -4.22057 | 0.32726  |
| H | 0.71918  | -3.94018 | 1.66937  |
| H | 1.22638  | -4.95518 | 0.30445  |
| H | 2.97499  | -3.78287 | 1.78706  |
| H | -0.35834 | -2.10366 | 1.89704  |
| H | 2.66327  | -2.02433 | 1.96858  |
| H | 4.20888  | -2.60675 | 1.29418  |
| H | 1.13272  | -3.09326 | -1.25134 |
| H | 3.43530  | -1.27573 | -0.59461 |
| H | 3.22711  | 0.69137  | 1.02474  |
| H | 6.16647  | 3.07629  | 0.48313  |
| H | 4.89738  | 3.77104  | -0.54228 |
| H | 4.51063  | 3.22322  | 1.09722  |
| H | 5.14170  | -0.79451 | -2.45898 |
| H | 0.84307  | 2.18696  | 0.95720  |
| H | 1.08698  | 3.89682  | 0.47534  |
| H | 0.73770  | 2.66442  | -0.74812 |
| H | -1.30668 | 1.35299  | 1.10453  |
| H | -3.40181 | 3.47940  | 1.18738  |
| H | -3.53056 | 1.82132  | 1.79383  |
| H | -2.39524 | 1.08534  | -1.07838 |
| H | -3.31443 | 0.72925  | -3.22153 |
| H | -4.53288 | -0.08481 | -2.20916 |
| H | 1.96303  | -0.52022 | -3.98906 |
| H | 0.17557  | -0.46193 | -3.86760 |
| H | 1.14809  | 0.87158  | -3.20091 |
| H | -4.79660 | 1.59246  | -2.73250 |
| O | 1.77637  | 0.37637  | 2.47946  |
| C | 1.82968  | 0.79063  | 3.82884  |
| H | 2.87999  | 0.88506  | 4.13292  |
| H | 1.34842  | 0.06731  | 4.50605  |
| H | 1.34633  | 1.76819  | 3.98788  |
| H | 6.04942  | 1.54248  | -2.01250 |
| H | 0.77520  | 0.20666  | 2.21795  |

Optimized Molecular Properties for **T6-INT2-2**

|                                                |                                                                                                                                                                                                                                                                                                                                                                                                                                                                                                                                                                                                                                                                                                                                                                                                                                                                                                                                                                                                                                                                                                                                                                                                                                                                                                                                                                                                                                                                                                                                                                                                                                                                                                                                                                                                                                                                                                                                                                                 |          |          |          |         |   |          |         |         |   |          |         |          |   |          |         |         |   |          |          |         |   |          |          |         |   |          |         |          |   |          |          |         |   |          |          |         |   |         |         |         |   |          |          |          |   |          |          |          |   |         |          |          |   |         |          |          |   |         |          |          |   |         |          |          |   |         |          |         |   |         |          |          |   |         |          |         |   |         |          |         |   |          |          |          |   |          |          |         |   |          |          |         |   |          |          |          |   |         |         |         |   |         |         |         |
|------------------------------------------------|---------------------------------------------------------------------------------------------------------------------------------------------------------------------------------------------------------------------------------------------------------------------------------------------------------------------------------------------------------------------------------------------------------------------------------------------------------------------------------------------------------------------------------------------------------------------------------------------------------------------------------------------------------------------------------------------------------------------------------------------------------------------------------------------------------------------------------------------------------------------------------------------------------------------------------------------------------------------------------------------------------------------------------------------------------------------------------------------------------------------------------------------------------------------------------------------------------------------------------------------------------------------------------------------------------------------------------------------------------------------------------------------------------------------------------------------------------------------------------------------------------------------------------------------------------------------------------------------------------------------------------------------------------------------------------------------------------------------------------------------------------------------------------------------------------------------------------------------------------------------------------------------------------------------------------------------------------------------------------|----------|----------|----------|---------|---|----------|---------|---------|---|----------|---------|----------|---|----------|---------|---------|---|----------|----------|---------|---|----------|----------|---------|---|----------|---------|----------|---|----------|----------|---------|---|----------|----------|---------|---|---------|---------|---------|---|----------|----------|----------|---|----------|----------|----------|---|---------|----------|----------|---|---------|----------|----------|---|---------|----------|----------|---|---------|----------|----------|---|---------|----------|---------|---|---------|----------|----------|---|---------|----------|---------|---|---------|----------|---------|---|----------|----------|----------|---|----------|----------|---------|---|----------|----------|---------|---|----------|----------|----------|---|---------|---------|---------|---|---------|---------|---------|
| Number of<br>(-)<br>Vibrational<br>Frequencies | 0                                                                                                                                                                                                                                                                                                                                                                                                                                                                                                                                                                                                                                                                                                                                                                                                                                                                                                                                                                                                                                                                                                                                                                                                                                                                                                                                                                                                                                                                                                                                                                                                                                                                                                                                                                                                                                                                                                                                                                               |          |          |          |         |   |          |         |         |   |          |         |          |   |          |         |         |   |          |          |         |   |          |          |         |   |          |         |          |   |          |          |         |   |          |          |         |   |         |         |         |   |          |          |          |   |          |          |          |   |         |          |          |   |         |          |          |   |         |          |          |   |         |          |          |   |         |          |         |   |         |          |          |   |         |          |         |   |         |          |         |   |          |          |          |   |          |          |         |   |          |          |         |   |          |          |          |   |         |         |         |   |         |         |         |
| Absolute<br>Energies<br>(Hartrees)             | <p><b>B3LYP/6-31G(d) (PCM)</b></p> <p>There are 20 positive frequencies below 100 cm<sup>-1</sup>.</p> <p>Zero-point correction: 0.609520 hartree<br/>         Enthalpy correction: 0.650946 hartree<br/>         Free Energy correction: 0.533584 hartree<br/>         Quasiharmonic Free Energy correction: 0.546315 hartree</p> <p>SCF Energy: -1644.901503 hartree<br/>         SCF Energy + ZPVE: -1644.291983 hartree<br/>         Enthalpy: -1644.250557 hartree<br/>         Free Energy: -1644.367919 hartree</p> <p>Free Energy with quasiharmonic correction: -1644.355189 hartree<br/>         (correction: 7.99 kcal/mol)</p> <p><b>B3LYP-D3/6-311+G(d,p) (PCM)</b></p> <p>SCF Done: E(RB3LYP) = -1645.49700907 A.U.</p>                                                                                                                                                                                                                                                                                                                                                                                                                                                                                                                                                                                                                                                                                                                                                                                                                                                                                                                                                                                                                                                                                                                                                                                                                                           |          |          |          |         |   |          |         |         |   |          |         |          |   |          |         |         |   |          |          |         |   |          |          |         |   |          |         |          |   |          |          |         |   |          |          |         |   |         |         |         |   |          |          |          |   |          |          |          |   |         |          |          |   |         |          |          |   |         |          |          |   |         |          |          |   |         |          |         |   |         |          |          |   |         |          |         |   |         |          |         |   |          |          |          |   |          |          |         |   |          |          |         |   |          |          |          |   |         |         |         |   |         |         |         |
| Cartesian<br>Coordinates                       | <p>(PCM)</p> <p>72</p> <p>spD3-INT2-2-T6.out Energy: -1032564.9544026</p> <table> <tr><td>O</td><td>-2.66399</td><td>-2.74810</td><td>0.05908</td></tr> <tr><td>C</td><td>-4.75456</td><td>1.67562</td><td>0.28958</td></tr> <tr><td>C</td><td>-3.85420</td><td>0.73049</td><td>-0.12714</td></tr> <tr><td>N</td><td>-5.40477</td><td>1.12434</td><td>1.38972</td></tr> <tr><td>C</td><td>-4.92538</td><td>-0.10140</td><td>1.63807</td></tr> <tr><td>N</td><td>-3.98681</td><td>-0.35123</td><td>0.72968</td></tr> <tr><td>C</td><td>-5.07114</td><td>3.03598</td><td>-0.23531</td></tr> <tr><td>C</td><td>-1.21621</td><td>-2.87207</td><td>0.17631</td></tr> <tr><td>C</td><td>-0.29436</td><td>-0.66340</td><td>1.12348</td></tr> <tr><td>O</td><td>0.58094</td><td>0.16439</td><td>1.28354</td></tr> <tr><td>C</td><td>-3.18756</td><td>-2.76629</td><td>-1.27833</td></tr> <tr><td>C</td><td>-0.54418</td><td>-1.48994</td><td>-0.12915</td></tr> <tr><td>C</td><td>0.63279</td><td>-1.42592</td><td>-1.15284</td></tr> <tr><td>C</td><td>2.02667</td><td>-1.79287</td><td>-0.65279</td></tr> <tr><td>O</td><td>0.66810</td><td>-0.15471</td><td>-1.77234</td></tr> <tr><td>C</td><td>3.12923</td><td>-1.45489</td><td>-1.45250</td></tr> <tr><td>C</td><td>2.26394</td><td>-2.50835</td><td>0.52697</td></tr> <tr><td>C</td><td>4.42449</td><td>-1.81667</td><td>-1.08337</td></tr> <tr><td>C</td><td>3.55945</td><td>-2.88033</td><td>0.89823</td></tr> <tr><td>C</td><td>4.64647</td><td>-2.53489</td><td>0.09484</td></tr> <tr><td>H</td><td>-1.31396</td><td>-0.92302</td><td>-0.67456</td></tr> <tr><td>O</td><td>-1.22650</td><td>-0.90249</td><td>2.07915</td></tr> <tr><td>C</td><td>-1.10431</td><td>-0.12354</td><td>3.28433</td></tr> <tr><td>C</td><td>-0.70515</td><td>-4.07869</td><td>-0.61303</td></tr> <tr><td>C</td><td>4.05690</td><td>2.02033</td><td>0.26261</td></tr> <tr><td>O</td><td>5.27229</td><td>2.22868</td><td>0.31335</td></tr> </table> | O        | -2.66399 | -2.74810 | 0.05908 | C | -4.75456 | 1.67562 | 0.28958 | C | -3.85420 | 0.73049 | -0.12714 | N | -5.40477 | 1.12434 | 1.38972 | C | -4.92538 | -0.10140 | 1.63807 | N | -3.98681 | -0.35123 | 0.72968 | C | -5.07114 | 3.03598 | -0.23531 | C | -1.21621 | -2.87207 | 0.17631 | C | -0.29436 | -0.66340 | 1.12348 | O | 0.58094 | 0.16439 | 1.28354 | C | -3.18756 | -2.76629 | -1.27833 | C | -0.54418 | -1.48994 | -0.12915 | C | 0.63279 | -1.42592 | -1.15284 | C | 2.02667 | -1.79287 | -0.65279 | O | 0.66810 | -0.15471 | -1.77234 | C | 3.12923 | -1.45489 | -1.45250 | C | 2.26394 | -2.50835 | 0.52697 | C | 4.42449 | -1.81667 | -1.08337 | C | 3.55945 | -2.88033 | 0.89823 | C | 4.64647 | -2.53489 | 0.09484 | H | -1.31396 | -0.92302 | -0.67456 | O | -1.22650 | -0.90249 | 2.07915 | C | -1.10431 | -0.12354 | 3.28433 | C | -0.70515 | -4.07869 | -0.61303 | C | 4.05690 | 2.02033 | 0.26261 | O | 5.27229 | 2.22868 | 0.31335 |
| O                                              | -2.66399                                                                                                                                                                                                                                                                                                                                                                                                                                                                                                                                                                                                                                                                                                                                                                                                                                                                                                                                                                                                                                                                                                                                                                                                                                                                                                                                                                                                                                                                                                                                                                                                                                                                                                                                                                                                                                                                                                                                                                        | -2.74810 | 0.05908  |          |         |   |          |         |         |   |          |         |          |   |          |         |         |   |          |          |         |   |          |          |         |   |          |         |          |   |          |          |         |   |          |          |         |   |         |         |         |   |          |          |          |   |          |          |          |   |         |          |          |   |         |          |          |   |         |          |          |   |         |          |          |   |         |          |         |   |         |          |          |   |         |          |         |   |         |          |         |   |          |          |          |   |          |          |         |   |          |          |         |   |          |          |          |   |         |         |         |   |         |         |         |
| C                                              | -4.75456                                                                                                                                                                                                                                                                                                                                                                                                                                                                                                                                                                                                                                                                                                                                                                                                                                                                                                                                                                                                                                                                                                                                                                                                                                                                                                                                                                                                                                                                                                                                                                                                                                                                                                                                                                                                                                                                                                                                                                        | 1.67562  | 0.28958  |          |         |   |          |         |         |   |          |         |          |   |          |         |         |   |          |          |         |   |          |          |         |   |          |         |          |   |          |          |         |   |          |          |         |   |         |         |         |   |          |          |          |   |          |          |          |   |         |          |          |   |         |          |          |   |         |          |          |   |         |          |          |   |         |          |         |   |         |          |          |   |         |          |         |   |         |          |         |   |          |          |          |   |          |          |         |   |          |          |         |   |          |          |          |   |         |         |         |   |         |         |         |
| C                                              | -3.85420                                                                                                                                                                                                                                                                                                                                                                                                                                                                                                                                                                                                                                                                                                                                                                                                                                                                                                                                                                                                                                                                                                                                                                                                                                                                                                                                                                                                                                                                                                                                                                                                                                                                                                                                                                                                                                                                                                                                                                        | 0.73049  | -0.12714 |          |         |   |          |         |         |   |          |         |          |   |          |         |         |   |          |          |         |   |          |          |         |   |          |         |          |   |          |          |         |   |          |          |         |   |         |         |         |   |          |          |          |   |          |          |          |   |         |          |          |   |         |          |          |   |         |          |          |   |         |          |          |   |         |          |         |   |         |          |          |   |         |          |         |   |         |          |         |   |          |          |          |   |          |          |         |   |          |          |         |   |          |          |          |   |         |         |         |   |         |         |         |
| N                                              | -5.40477                                                                                                                                                                                                                                                                                                                                                                                                                                                                                                                                                                                                                                                                                                                                                                                                                                                                                                                                                                                                                                                                                                                                                                                                                                                                                                                                                                                                                                                                                                                                                                                                                                                                                                                                                                                                                                                                                                                                                                        | 1.12434  | 1.38972  |          |         |   |          |         |         |   |          |         |          |   |          |         |         |   |          |          |         |   |          |          |         |   |          |         |          |   |          |          |         |   |          |          |         |   |         |         |         |   |          |          |          |   |          |          |          |   |         |          |          |   |         |          |          |   |         |          |          |   |         |          |          |   |         |          |         |   |         |          |          |   |         |          |         |   |         |          |         |   |          |          |          |   |          |          |         |   |          |          |         |   |          |          |          |   |         |         |         |   |         |         |         |
| C                                              | -4.92538                                                                                                                                                                                                                                                                                                                                                                                                                                                                                                                                                                                                                                                                                                                                                                                                                                                                                                                                                                                                                                                                                                                                                                                                                                                                                                                                                                                                                                                                                                                                                                                                                                                                                                                                                                                                                                                                                                                                                                        | -0.10140 | 1.63807  |          |         |   |          |         |         |   |          |         |          |   |          |         |         |   |          |          |         |   |          |          |         |   |          |         |          |   |          |          |         |   |          |          |         |   |         |         |         |   |          |          |          |   |          |          |          |   |         |          |          |   |         |          |          |   |         |          |          |   |         |          |          |   |         |          |         |   |         |          |          |   |         |          |         |   |         |          |         |   |          |          |          |   |          |          |         |   |          |          |         |   |          |          |          |   |         |         |         |   |         |         |         |
| N                                              | -3.98681                                                                                                                                                                                                                                                                                                                                                                                                                                                                                                                                                                                                                                                                                                                                                                                                                                                                                                                                                                                                                                                                                                                                                                                                                                                                                                                                                                                                                                                                                                                                                                                                                                                                                                                                                                                                                                                                                                                                                                        | -0.35123 | 0.72968  |          |         |   |          |         |         |   |          |         |          |   |          |         |         |   |          |          |         |   |          |          |         |   |          |         |          |   |          |          |         |   |          |          |         |   |         |         |         |   |          |          |          |   |          |          |          |   |         |          |          |   |         |          |          |   |         |          |          |   |         |          |          |   |         |          |         |   |         |          |          |   |         |          |         |   |         |          |         |   |          |          |          |   |          |          |         |   |          |          |         |   |          |          |          |   |         |         |         |   |         |         |         |
| C                                              | -5.07114                                                                                                                                                                                                                                                                                                                                                                                                                                                                                                                                                                                                                                                                                                                                                                                                                                                                                                                                                                                                                                                                                                                                                                                                                                                                                                                                                                                                                                                                                                                                                                                                                                                                                                                                                                                                                                                                                                                                                                        | 3.03598  | -0.23531 |          |         |   |          |         |         |   |          |         |          |   |          |         |         |   |          |          |         |   |          |          |         |   |          |         |          |   |          |          |         |   |          |          |         |   |         |         |         |   |          |          |          |   |          |          |          |   |         |          |          |   |         |          |          |   |         |          |          |   |         |          |          |   |         |          |         |   |         |          |          |   |         |          |         |   |         |          |         |   |          |          |          |   |          |          |         |   |          |          |         |   |          |          |          |   |         |         |         |   |         |         |         |
| C                                              | -1.21621                                                                                                                                                                                                                                                                                                                                                                                                                                                                                                                                                                                                                                                                                                                                                                                                                                                                                                                                                                                                                                                                                                                                                                                                                                                                                                                                                                                                                                                                                                                                                                                                                                                                                                                                                                                                                                                                                                                                                                        | -2.87207 | 0.17631  |          |         |   |          |         |         |   |          |         |          |   |          |         |         |   |          |          |         |   |          |          |         |   |          |         |          |   |          |          |         |   |          |          |         |   |         |         |         |   |          |          |          |   |          |          |          |   |         |          |          |   |         |          |          |   |         |          |          |   |         |          |          |   |         |          |         |   |         |          |          |   |         |          |         |   |         |          |         |   |          |          |          |   |          |          |         |   |          |          |         |   |          |          |          |   |         |         |         |   |         |         |         |
| C                                              | -0.29436                                                                                                                                                                                                                                                                                                                                                                                                                                                                                                                                                                                                                                                                                                                                                                                                                                                                                                                                                                                                                                                                                                                                                                                                                                                                                                                                                                                                                                                                                                                                                                                                                                                                                                                                                                                                                                                                                                                                                                        | -0.66340 | 1.12348  |          |         |   |          |         |         |   |          |         |          |   |          |         |         |   |          |          |         |   |          |          |         |   |          |         |          |   |          |          |         |   |          |          |         |   |         |         |         |   |          |          |          |   |          |          |          |   |         |          |          |   |         |          |          |   |         |          |          |   |         |          |          |   |         |          |         |   |         |          |          |   |         |          |         |   |         |          |         |   |          |          |          |   |          |          |         |   |          |          |         |   |          |          |          |   |         |         |         |   |         |         |         |
| O                                              | 0.58094                                                                                                                                                                                                                                                                                                                                                                                                                                                                                                                                                                                                                                                                                                                                                                                                                                                                                                                                                                                                                                                                                                                                                                                                                                                                                                                                                                                                                                                                                                                                                                                                                                                                                                                                                                                                                                                                                                                                                                         | 0.16439  | 1.28354  |          |         |   |          |         |         |   |          |         |          |   |          |         |         |   |          |          |         |   |          |          |         |   |          |         |          |   |          |          |         |   |          |          |         |   |         |         |         |   |          |          |          |   |          |          |          |   |         |          |          |   |         |          |          |   |         |          |          |   |         |          |          |   |         |          |         |   |         |          |          |   |         |          |         |   |         |          |         |   |          |          |          |   |          |          |         |   |          |          |         |   |          |          |          |   |         |         |         |   |         |         |         |
| C                                              | -3.18756                                                                                                                                                                                                                                                                                                                                                                                                                                                                                                                                                                                                                                                                                                                                                                                                                                                                                                                                                                                                                                                                                                                                                                                                                                                                                                                                                                                                                                                                                                                                                                                                                                                                                                                                                                                                                                                                                                                                                                        | -2.76629 | -1.27833 |          |         |   |          |         |         |   |          |         |          |   |          |         |         |   |          |          |         |   |          |          |         |   |          |         |          |   |          |          |         |   |          |          |         |   |         |         |         |   |          |          |          |   |          |          |          |   |         |          |          |   |         |          |          |   |         |          |          |   |         |          |          |   |         |          |         |   |         |          |          |   |         |          |         |   |         |          |         |   |          |          |          |   |          |          |         |   |          |          |         |   |          |          |          |   |         |         |         |   |         |         |         |
| C                                              | -0.54418                                                                                                                                                                                                                                                                                                                                                                                                                                                                                                                                                                                                                                                                                                                                                                                                                                                                                                                                                                                                                                                                                                                                                                                                                                                                                                                                                                                                                                                                                                                                                                                                                                                                                                                                                                                                                                                                                                                                                                        | -1.48994 | -0.12915 |          |         |   |          |         |         |   |          |         |          |   |          |         |         |   |          |          |         |   |          |          |         |   |          |         |          |   |          |          |         |   |          |          |         |   |         |         |         |   |          |          |          |   |          |          |          |   |         |          |          |   |         |          |          |   |         |          |          |   |         |          |          |   |         |          |         |   |         |          |          |   |         |          |         |   |         |          |         |   |          |          |          |   |          |          |         |   |          |          |         |   |          |          |          |   |         |         |         |   |         |         |         |
| C                                              | 0.63279                                                                                                                                                                                                                                                                                                                                                                                                                                                                                                                                                                                                                                                                                                                                                                                                                                                                                                                                                                                                                                                                                                                                                                                                                                                                                                                                                                                                                                                                                                                                                                                                                                                                                                                                                                                                                                                                                                                                                                         | -1.42592 | -1.15284 |          |         |   |          |         |         |   |          |         |          |   |          |         |         |   |          |          |         |   |          |          |         |   |          |         |          |   |          |          |         |   |          |          |         |   |         |         |         |   |          |          |          |   |          |          |          |   |         |          |          |   |         |          |          |   |         |          |          |   |         |          |          |   |         |          |         |   |         |          |          |   |         |          |         |   |         |          |         |   |          |          |          |   |          |          |         |   |          |          |         |   |          |          |          |   |         |         |         |   |         |         |         |
| C                                              | 2.02667                                                                                                                                                                                                                                                                                                                                                                                                                                                                                                                                                                                                                                                                                                                                                                                                                                                                                                                                                                                                                                                                                                                                                                                                                                                                                                                                                                                                                                                                                                                                                                                                                                                                                                                                                                                                                                                                                                                                                                         | -1.79287 | -0.65279 |          |         |   |          |         |         |   |          |         |          |   |          |         |         |   |          |          |         |   |          |          |         |   |          |         |          |   |          |          |         |   |          |          |         |   |         |         |         |   |          |          |          |   |          |          |          |   |         |          |          |   |         |          |          |   |         |          |          |   |         |          |          |   |         |          |         |   |         |          |          |   |         |          |         |   |         |          |         |   |          |          |          |   |          |          |         |   |          |          |         |   |          |          |          |   |         |         |         |   |         |         |         |
| O                                              | 0.66810                                                                                                                                                                                                                                                                                                                                                                                                                                                                                                                                                                                                                                                                                                                                                                                                                                                                                                                                                                                                                                                                                                                                                                                                                                                                                                                                                                                                                                                                                                                                                                                                                                                                                                                                                                                                                                                                                                                                                                         | -0.15471 | -1.77234 |          |         |   |          |         |         |   |          |         |          |   |          |         |         |   |          |          |         |   |          |          |         |   |          |         |          |   |          |          |         |   |          |          |         |   |         |         |         |   |          |          |          |   |          |          |          |   |         |          |          |   |         |          |          |   |         |          |          |   |         |          |          |   |         |          |         |   |         |          |          |   |         |          |         |   |         |          |         |   |          |          |          |   |          |          |         |   |          |          |         |   |          |          |          |   |         |         |         |   |         |         |         |
| C                                              | 3.12923                                                                                                                                                                                                                                                                                                                                                                                                                                                                                                                                                                                                                                                                                                                                                                                                                                                                                                                                                                                                                                                                                                                                                                                                                                                                                                                                                                                                                                                                                                                                                                                                                                                                                                                                                                                                                                                                                                                                                                         | -1.45489 | -1.45250 |          |         |   |          |         |         |   |          |         |          |   |          |         |         |   |          |          |         |   |          |          |         |   |          |         |          |   |          |          |         |   |          |          |         |   |         |         |         |   |          |          |          |   |          |          |          |   |         |          |          |   |         |          |          |   |         |          |          |   |         |          |          |   |         |          |         |   |         |          |          |   |         |          |         |   |         |          |         |   |          |          |          |   |          |          |         |   |          |          |         |   |          |          |          |   |         |         |         |   |         |         |         |
| C                                              | 2.26394                                                                                                                                                                                                                                                                                                                                                                                                                                                                                                                                                                                                                                                                                                                                                                                                                                                                                                                                                                                                                                                                                                                                                                                                                                                                                                                                                                                                                                                                                                                                                                                                                                                                                                                                                                                                                                                                                                                                                                         | -2.50835 | 0.52697  |          |         |   |          |         |         |   |          |         |          |   |          |         |         |   |          |          |         |   |          |          |         |   |          |         |          |   |          |          |         |   |          |          |         |   |         |         |         |   |          |          |          |   |          |          |          |   |         |          |          |   |         |          |          |   |         |          |          |   |         |          |          |   |         |          |         |   |         |          |          |   |         |          |         |   |         |          |         |   |          |          |          |   |          |          |         |   |          |          |         |   |          |          |          |   |         |         |         |   |         |         |         |
| C                                              | 4.42449                                                                                                                                                                                                                                                                                                                                                                                                                                                                                                                                                                                                                                                                                                                                                                                                                                                                                                                                                                                                                                                                                                                                                                                                                                                                                                                                                                                                                                                                                                                                                                                                                                                                                                                                                                                                                                                                                                                                                                         | -1.81667 | -1.08337 |          |         |   |          |         |         |   |          |         |          |   |          |         |         |   |          |          |         |   |          |          |         |   |          |         |          |   |          |          |         |   |          |          |         |   |         |         |         |   |          |          |          |   |          |          |          |   |         |          |          |   |         |          |          |   |         |          |          |   |         |          |          |   |         |          |         |   |         |          |          |   |         |          |         |   |         |          |         |   |          |          |          |   |          |          |         |   |          |          |         |   |          |          |          |   |         |         |         |   |         |         |         |
| C                                              | 3.55945                                                                                                                                                                                                                                                                                                                                                                                                                                                                                                                                                                                                                                                                                                                                                                                                                                                                                                                                                                                                                                                                                                                                                                                                                                                                                                                                                                                                                                                                                                                                                                                                                                                                                                                                                                                                                                                                                                                                                                         | -2.88033 | 0.89823  |          |         |   |          |         |         |   |          |         |          |   |          |         |         |   |          |          |         |   |          |          |         |   |          |         |          |   |          |          |         |   |          |          |         |   |         |         |         |   |          |          |          |   |          |          |          |   |         |          |          |   |         |          |          |   |         |          |          |   |         |          |          |   |         |          |         |   |         |          |          |   |         |          |         |   |         |          |         |   |          |          |          |   |          |          |         |   |          |          |         |   |          |          |          |   |         |         |         |   |         |         |         |
| C                                              | 4.64647                                                                                                                                                                                                                                                                                                                                                                                                                                                                                                                                                                                                                                                                                                                                                                                                                                                                                                                                                                                                                                                                                                                                                                                                                                                                                                                                                                                                                                                                                                                                                                                                                                                                                                                                                                                                                                                                                                                                                                         | -2.53489 | 0.09484  |          |         |   |          |         |         |   |          |         |          |   |          |         |         |   |          |          |         |   |          |          |         |   |          |         |          |   |          |          |         |   |          |          |         |   |         |         |         |   |          |          |          |   |          |          |          |   |         |          |          |   |         |          |          |   |         |          |          |   |         |          |          |   |         |          |         |   |         |          |          |   |         |          |         |   |         |          |         |   |          |          |          |   |          |          |         |   |          |          |         |   |          |          |          |   |         |         |         |   |         |         |         |
| H                                              | -1.31396                                                                                                                                                                                                                                                                                                                                                                                                                                                                                                                                                                                                                                                                                                                                                                                                                                                                                                                                                                                                                                                                                                                                                                                                                                                                                                                                                                                                                                                                                                                                                                                                                                                                                                                                                                                                                                                                                                                                                                        | -0.92302 | -0.67456 |          |         |   |          |         |         |   |          |         |          |   |          |         |         |   |          |          |         |   |          |          |         |   |          |         |          |   |          |          |         |   |          |          |         |   |         |         |         |   |          |          |          |   |          |          |          |   |         |          |          |   |         |          |          |   |         |          |          |   |         |          |          |   |         |          |         |   |         |          |          |   |         |          |         |   |         |          |         |   |          |          |          |   |          |          |         |   |          |          |         |   |          |          |          |   |         |         |         |   |         |         |         |
| O                                              | -1.22650                                                                                                                                                                                                                                                                                                                                                                                                                                                                                                                                                                                                                                                                                                                                                                                                                                                                                                                                                                                                                                                                                                                                                                                                                                                                                                                                                                                                                                                                                                                                                                                                                                                                                                                                                                                                                                                                                                                                                                        | -0.90249 | 2.07915  |          |         |   |          |         |         |   |          |         |          |   |          |         |         |   |          |          |         |   |          |          |         |   |          |         |          |   |          |          |         |   |          |          |         |   |         |         |         |   |          |          |          |   |          |          |          |   |         |          |          |   |         |          |          |   |         |          |          |   |         |          |          |   |         |          |         |   |         |          |          |   |         |          |         |   |         |          |         |   |          |          |          |   |          |          |         |   |          |          |         |   |          |          |          |   |         |         |         |   |         |         |         |
| C                                              | -1.10431                                                                                                                                                                                                                                                                                                                                                                                                                                                                                                                                                                                                                                                                                                                                                                                                                                                                                                                                                                                                                                                                                                                                                                                                                                                                                                                                                                                                                                                                                                                                                                                                                                                                                                                                                                                                                                                                                                                                                                        | -0.12354 | 3.28433  |          |         |   |          |         |         |   |          |         |          |   |          |         |         |   |          |          |         |   |          |          |         |   |          |         |          |   |          |          |         |   |          |          |         |   |         |         |         |   |          |          |          |   |          |          |          |   |         |          |          |   |         |          |          |   |         |          |          |   |         |          |          |   |         |          |         |   |         |          |          |   |         |          |         |   |         |          |         |   |          |          |          |   |          |          |         |   |          |          |         |   |          |          |          |   |         |         |         |   |         |         |         |
| C                                              | -0.70515                                                                                                                                                                                                                                                                                                                                                                                                                                                                                                                                                                                                                                                                                                                                                                                                                                                                                                                                                                                                                                                                                                                                                                                                                                                                                                                                                                                                                                                                                                                                                                                                                                                                                                                                                                                                                                                                                                                                                                        | -4.07869 | -0.61303 |          |         |   |          |         |         |   |          |         |          |   |          |         |         |   |          |          |         |   |          |          |         |   |          |         |          |   |          |          |         |   |          |          |         |   |         |         |         |   |          |          |          |   |          |          |          |   |         |          |          |   |         |          |          |   |         |          |          |   |         |          |          |   |         |          |         |   |         |          |          |   |         |          |         |   |         |          |         |   |          |          |          |   |          |          |         |   |          |          |         |   |          |          |          |   |         |         |         |   |         |         |         |
| C                                              | 4.05690                                                                                                                                                                                                                                                                                                                                                                                                                                                                                                                                                                                                                                                                                                                                                                                                                                                                                                                                                                                                                                                                                                                                                                                                                                                                                                                                                                                                                                                                                                                                                                                                                                                                                                                                                                                                                                                                                                                                                                         | 2.02033  | 0.26261  |          |         |   |          |         |         |   |          |         |          |   |          |         |         |   |          |          |         |   |          |          |         |   |          |         |          |   |          |          |         |   |          |          |         |   |         |         |         |   |          |          |          |   |          |          |          |   |         |          |          |   |         |          |          |   |         |          |          |   |         |          |          |   |         |          |         |   |         |          |          |   |         |          |         |   |         |          |         |   |          |          |          |   |          |          |         |   |          |          |         |   |          |          |          |   |         |         |         |   |         |         |         |
| O                                              | 5.27229                                                                                                                                                                                                                                                                                                                                                                                                                                                                                                                                                                                                                                                                                                                                                                                                                                                                                                                                                                                                                                                                                                                                                                                                                                                                                                                                                                                                                                                                                                                                                                                                                                                                                                                                                                                                                                                                                                                                                                         | 2.22868  | 0.31335  |          |         |   |          |         |         |   |          |         |          |   |          |         |         |   |          |          |         |   |          |          |         |   |          |         |          |   |          |          |         |   |          |          |         |   |         |         |         |   |          |          |          |   |          |          |          |   |         |          |          |   |         |          |          |   |         |          |          |   |         |          |          |   |         |          |         |   |         |          |          |   |         |          |         |   |         |          |         |   |          |          |          |   |          |          |         |   |          |          |         |   |          |          |          |   |         |         |         |   |         |         |         |

|   |          |          |          |
|---|----------|----------|----------|
| C | 3.25798  | 2.45904  | -0.97500 |
| N | 1.81872  | 2.33252  | -0.89853 |
| C | 1.03865  | 3.38043  | -0.51678 |
| O | 1.49787  | 4.49199  | -0.23633 |
| C | -0.44977 | 3.08485  | -0.42732 |
| N | 3.35536  | 1.41262  | 1.24362  |
| C | 4.00230  | 0.87817  | 2.42763  |
| H | 3.71541  | -3.43449 | 1.82041  |
| H | 5.65486  | -2.81933 | 0.38313  |
| H | 5.26264  | -1.53790 | -1.71674 |
| H | 2.95817  | -0.89782 | -2.36791 |
| H | 1.43912  | -2.77851 | 1.18099  |
| H | 0.34945  | -4.25654 | -0.38684 |
| H | -0.79660 | -3.96165 | -1.69557 |
| H | -1.27265 | -4.96649 | -0.31449 |
| H | -3.04202 | -3.74292 | -1.74996 |
| H | 0.37725  | -2.17235 | -1.92296 |
| H | -2.74382 | -1.97421 | -1.89449 |
| H | -4.26157 | -2.58575 | -1.18306 |
| H | -1.09138 | -3.09924 | 1.23637  |
| H | -3.43519 | -1.22843 | 0.66189  |
| H | -3.10589 | 0.71900  | -0.94157 |
| H | -6.11540 | 3.10742  | -0.56083 |
| H | -4.89931 | 3.80875  | 0.52252  |
| H | -4.43161 | 3.25344  | -1.09329 |
| H | -5.24744 | -0.76002 | 2.42873  |
| H | -0.77907 | 2.26345  | -1.07326 |
| H | -0.99959 | 3.99785  | -0.67159 |
| H | -0.68877 | 2.81649  | 0.60943  |
| H | 1.38881  | 1.42742  | -1.12885 |
| H | 3.51157  | 3.50600  | -1.15754 |
| H | 3.63147  | 1.87046  | -1.82016 |
| H | 2.38501  | 1.17051  | 1.07543  |
| H | 3.26326  | 0.78677  | 3.22783  |
| H | 4.44519  | -0.10861 | 2.24076  |
| H | -1.92583 | -0.44615 | 3.92411  |
| H | -0.14456 | -0.31660 | 3.76903  |
| H | -1.18537 | 0.94290  | 3.06081  |
| H | 4.79676  | 1.55793  | 2.74428  |
| O | -1.75971 | 0.38285  | -2.17611 |
| H | -0.32362 | 0.09135  | -2.04795 |
| C | -2.20280 | 0.56429  | -3.48011 |
| H | -3.30053 | 0.72866  | -3.53093 |
| H | -2.00079 | -0.30249 | -4.14540 |
| H | -1.74568 | 1.44262  | -3.98287 |
| H | -6.13337 | 1.57336  | 1.93092  |

Optimized Molecular Properties for **T6-TS3**

|                                                |                                                                                                                                                                                                                                                                                                                                                                                                                                                                                                                                                                                                                                                                                                                                                                                                                                                                                                                                                                                                                                                                                                                                                                                                                                                                                                                                                                                                                                                                                                                                                                                                                                                                                                                                                                                                                                                                                                       |          |          |          |         |   |         |         |          |   |         |         |          |   |         |         |          |   |         |          |          |   |         |          |          |   |         |         |          |   |         |          |         |   |         |          |          |   |          |         |          |   |         |          |         |   |         |          |         |   |          |          |         |   |          |          |         |   |          |          |         |   |          |          |         |   |          |          |          |   |          |          |         |   |          |          |          |   |          |          |          |   |         |          |         |   |         |          |          |   |         |         |          |   |         |          |         |   |          |         |          |
|------------------------------------------------|-------------------------------------------------------------------------------------------------------------------------------------------------------------------------------------------------------------------------------------------------------------------------------------------------------------------------------------------------------------------------------------------------------------------------------------------------------------------------------------------------------------------------------------------------------------------------------------------------------------------------------------------------------------------------------------------------------------------------------------------------------------------------------------------------------------------------------------------------------------------------------------------------------------------------------------------------------------------------------------------------------------------------------------------------------------------------------------------------------------------------------------------------------------------------------------------------------------------------------------------------------------------------------------------------------------------------------------------------------------------------------------------------------------------------------------------------------------------------------------------------------------------------------------------------------------------------------------------------------------------------------------------------------------------------------------------------------------------------------------------------------------------------------------------------------------------------------------------------------------------------------------------------------|----------|----------|----------|---------|---|---------|---------|----------|---|---------|---------|----------|---|---------|---------|----------|---|---------|----------|----------|---|---------|----------|----------|---|---------|---------|----------|---|---------|----------|---------|---|---------|----------|----------|---|----------|---------|----------|---|---------|----------|---------|---|---------|----------|---------|---|----------|----------|---------|---|----------|----------|---------|---|----------|----------|---------|---|----------|----------|---------|---|----------|----------|----------|---|----------|----------|---------|---|----------|----------|----------|---|----------|----------|----------|---|---------|----------|---------|---|---------|----------|----------|---|---------|---------|----------|---|---------|----------|---------|---|----------|---------|----------|
| Number of<br>(-)<br>Vibrational<br>Frequencies | 1 (-1189.8021)                                                                                                                                                                                                                                                                                                                                                                                                                                                                                                                                                                                                                                                                                                                                                                                                                                                                                                                                                                                                                                                                                                                                                                                                                                                                                                                                                                                                                                                                                                                                                                                                                                                                                                                                                                                                                                                                                        |          |          |          |         |   |         |         |          |   |         |         |          |   |         |         |          |   |         |          |          |   |         |          |          |   |         |         |          |   |         |          |         |   |         |          |          |   |          |         |          |   |         |          |         |   |         |          |         |   |          |          |         |   |          |          |         |   |          |          |         |   |          |          |         |   |          |          |          |   |          |          |         |   |          |          |          |   |          |          |          |   |         |          |         |   |         |          |          |   |         |         |          |   |         |          |         |   |          |         |          |
| Absolute<br>Energies<br>(Hartrees)             | <p><b>B3LYP/6-31G(d)(PCM)</b></p> <p>There are 18 positive frequencies below 100 cm<sup>-1</sup>.</p> <p>Zero-point correction: 0.606193 hartree<br/>         Enthalpy correction: 0.647133 hartree<br/>         Free Energy correction: 0.531710 hartree<br/>         Quasiharmonic Free Energy correction: 0.543459 hartree</p> <p>SCF Energy: -1644.879617 hartree<br/>         SCF Energy + ZPVE: -1644.273424 hartree<br/>         Enthalpy: -1644.232484 hartree<br/>         Free Energy: -1644.347907 hartree</p> <p>Free Energy with quasiharmonic correction: -1644.336158 hartree<br/>         (correction: 7.37 kcal/mol)</p> <p><b>B3LYP-D3/6-311+G(d,p)(PCM)</b></p> <p>SCF Done: E(RB3LYP) = -1645.47839092 A.U.</p>                                                                                                                                                                                                                                                                                                                                                                                                                                                                                                                                                                                                                                                                                                                                                                                                                                                                                                                                                                                                                                                                                                                                                                   |          |          |          |         |   |         |         |          |   |         |         |          |   |         |         |          |   |         |          |          |   |         |          |          |   |         |         |          |   |         |          |         |   |         |          |          |   |          |         |          |   |         |          |         |   |         |          |         |   |          |          |         |   |          |          |         |   |          |          |         |   |          |          |         |   |          |          |          |   |          |          |         |   |          |          |          |   |          |          |          |   |         |          |         |   |         |          |          |   |         |         |          |   |         |          |         |   |          |         |          |
| Cartesian<br>Coordinates                       | <p>(PCM)</p> <p>72</p> <p>spD3-TS3-T6.out Energy: -1032553.2713372</p> <table> <tr><td>O</td><td>2.87166</td><td>-2.08981</td><td>0.56582</td></tr> <tr><td>C</td><td>5.69101</td><td>1.57695</td><td>-0.89348</td></tr> <tr><td>C</td><td>4.55257</td><td>1.10097</td><td>-0.30149</td></tr> <tr><td>N</td><td>6.30259</td><td>0.46247</td><td>-1.45419</td></tr> <tr><td>C</td><td>5.56939</td><td>-0.63374</td><td>-1.20873</td></tr> <tr><td>N</td><td>4.50288</td><td>-0.26201</td><td>-0.51160</td></tr> <tr><td>C</td><td>6.26099</td><td>2.95172</td><td>-0.98677</td></tr> <tr><td>C</td><td>1.46441</td><td>-2.34418</td><td>0.20107</td></tr> <tr><td>C</td><td>0.44292</td><td>-0.13404</td><td>-0.47655</td></tr> <tr><td>O</td><td>-0.45600</td><td>0.68870</td><td>-0.64236</td></tr> <tr><td>C</td><td>3.23400</td><td>-2.24464</td><td>1.94471</td></tr> <tr><td>C</td><td>0.52761</td><td>-1.17148</td><td>0.55200</td></tr> <tr><td>C</td><td>-0.82909</td><td>-1.50370</td><td>1.21905</td></tr> <tr><td>C</td><td>-1.98636</td><td>-1.95506</td><td>0.32856</td></tr> <tr><td>O</td><td>-1.30988</td><td>-0.41896</td><td>2.03509</td></tr> <tr><td>C</td><td>-3.27022</td><td>-2.05805</td><td>0.88898</td></tr> <tr><td>C</td><td>-1.81725</td><td>-2.35004</td><td>-1.00304</td></tr> <tr><td>C</td><td>-4.34838</td><td>-2.52963</td><td>0.13988</td></tr> <tr><td>C</td><td>-2.89365</td><td>-2.82680</td><td>-1.75742</td></tr> <tr><td>C</td><td>-4.16496</td><td>-2.91661</td><td>-1.19052</td></tr> <tr><td>H</td><td>1.05146</td><td>-0.51651</td><td>1.63089</td></tr> <tr><td>O</td><td>1.56490</td><td>-0.07959</td><td>-1.28103</td></tr> <tr><td>C</td><td>1.54396</td><td>0.92751</td><td>-2.29870</td></tr> <tr><td>C</td><td>1.06117</td><td>-3.72893</td><td>0.71410</td></tr> <tr><td>C</td><td>-4.38401</td><td>1.42036</td><td>-0.94680</td></tr> </table> | O        | 2.87166  | -2.08981 | 0.56582 | C | 5.69101 | 1.57695 | -0.89348 | C | 4.55257 | 1.10097 | -0.30149 | N | 6.30259 | 0.46247 | -1.45419 | C | 5.56939 | -0.63374 | -1.20873 | N | 4.50288 | -0.26201 | -0.51160 | C | 6.26099 | 2.95172 | -0.98677 | C | 1.46441 | -2.34418 | 0.20107 | C | 0.44292 | -0.13404 | -0.47655 | O | -0.45600 | 0.68870 | -0.64236 | C | 3.23400 | -2.24464 | 1.94471 | C | 0.52761 | -1.17148 | 0.55200 | C | -0.82909 | -1.50370 | 1.21905 | C | -1.98636 | -1.95506 | 0.32856 | O | -1.30988 | -0.41896 | 2.03509 | C | -3.27022 | -2.05805 | 0.88898 | C | -1.81725 | -2.35004 | -1.00304 | C | -4.34838 | -2.52963 | 0.13988 | C | -2.89365 | -2.82680 | -1.75742 | C | -4.16496 | -2.91661 | -1.19052 | H | 1.05146 | -0.51651 | 1.63089 | O | 1.56490 | -0.07959 | -1.28103 | C | 1.54396 | 0.92751 | -2.29870 | C | 1.06117 | -3.72893 | 0.71410 | C | -4.38401 | 1.42036 | -0.94680 |
| O                                              | 2.87166                                                                                                                                                                                                                                                                                                                                                                                                                                                                                                                                                                                                                                                                                                                                                                                                                                                                                                                                                                                                                                                                                                                                                                                                                                                                                                                                                                                                                                                                                                                                                                                                                                                                                                                                                                                                                                                                                               | -2.08981 | 0.56582  |          |         |   |         |         |          |   |         |         |          |   |         |         |          |   |         |          |          |   |         |          |          |   |         |         |          |   |         |          |         |   |         |          |          |   |          |         |          |   |         |          |         |   |         |          |         |   |          |          |         |   |          |          |         |   |          |          |         |   |          |          |         |   |          |          |          |   |          |          |         |   |          |          |          |   |          |          |          |   |         |          |         |   |         |          |          |   |         |         |          |   |         |          |         |   |          |         |          |
| C                                              | 5.69101                                                                                                                                                                                                                                                                                                                                                                                                                                                                                                                                                                                                                                                                                                                                                                                                                                                                                                                                                                                                                                                                                                                                                                                                                                                                                                                                                                                                                                                                                                                                                                                                                                                                                                                                                                                                                                                                                               | 1.57695  | -0.89348 |          |         |   |         |         |          |   |         |         |          |   |         |         |          |   |         |          |          |   |         |          |          |   |         |         |          |   |         |          |         |   |         |          |          |   |          |         |          |   |         |          |         |   |         |          |         |   |          |          |         |   |          |          |         |   |          |          |         |   |          |          |         |   |          |          |          |   |          |          |         |   |          |          |          |   |          |          |          |   |         |          |         |   |         |          |          |   |         |         |          |   |         |          |         |   |          |         |          |
| C                                              | 4.55257                                                                                                                                                                                                                                                                                                                                                                                                                                                                                                                                                                                                                                                                                                                                                                                                                                                                                                                                                                                                                                                                                                                                                                                                                                                                                                                                                                                                                                                                                                                                                                                                                                                                                                                                                                                                                                                                                               | 1.10097  | -0.30149 |          |         |   |         |         |          |   |         |         |          |   |         |         |          |   |         |          |          |   |         |          |          |   |         |         |          |   |         |          |         |   |         |          |          |   |          |         |          |   |         |          |         |   |         |          |         |   |          |          |         |   |          |          |         |   |          |          |         |   |          |          |         |   |          |          |          |   |          |          |         |   |          |          |          |   |          |          |          |   |         |          |         |   |         |          |          |   |         |         |          |   |         |          |         |   |          |         |          |
| N                                              | 6.30259                                                                                                                                                                                                                                                                                                                                                                                                                                                                                                                                                                                                                                                                                                                                                                                                                                                                                                                                                                                                                                                                                                                                                                                                                                                                                                                                                                                                                                                                                                                                                                                                                                                                                                                                                                                                                                                                                               | 0.46247  | -1.45419 |          |         |   |         |         |          |   |         |         |          |   |         |         |          |   |         |          |          |   |         |          |          |   |         |         |          |   |         |          |         |   |         |          |          |   |          |         |          |   |         |          |         |   |         |          |         |   |          |          |         |   |          |          |         |   |          |          |         |   |          |          |         |   |          |          |          |   |          |          |         |   |          |          |          |   |          |          |          |   |         |          |         |   |         |          |          |   |         |         |          |   |         |          |         |   |          |         |          |
| C                                              | 5.56939                                                                                                                                                                                                                                                                                                                                                                                                                                                                                                                                                                                                                                                                                                                                                                                                                                                                                                                                                                                                                                                                                                                                                                                                                                                                                                                                                                                                                                                                                                                                                                                                                                                                                                                                                                                                                                                                                               | -0.63374 | -1.20873 |          |         |   |         |         |          |   |         |         |          |   |         |         |          |   |         |          |          |   |         |          |          |   |         |         |          |   |         |          |         |   |         |          |          |   |          |         |          |   |         |          |         |   |         |          |         |   |          |          |         |   |          |          |         |   |          |          |         |   |          |          |         |   |          |          |          |   |          |          |         |   |          |          |          |   |          |          |          |   |         |          |         |   |         |          |          |   |         |         |          |   |         |          |         |   |          |         |          |
| N                                              | 4.50288                                                                                                                                                                                                                                                                                                                                                                                                                                                                                                                                                                                                                                                                                                                                                                                                                                                                                                                                                                                                                                                                                                                                                                                                                                                                                                                                                                                                                                                                                                                                                                                                                                                                                                                                                                                                                                                                                               | -0.26201 | -0.51160 |          |         |   |         |         |          |   |         |         |          |   |         |         |          |   |         |          |          |   |         |          |          |   |         |         |          |   |         |          |         |   |         |          |          |   |          |         |          |   |         |          |         |   |         |          |         |   |          |          |         |   |          |          |         |   |          |          |         |   |          |          |         |   |          |          |          |   |          |          |         |   |          |          |          |   |          |          |          |   |         |          |         |   |         |          |          |   |         |         |          |   |         |          |         |   |          |         |          |
| C                                              | 6.26099                                                                                                                                                                                                                                                                                                                                                                                                                                                                                                                                                                                                                                                                                                                                                                                                                                                                                                                                                                                                                                                                                                                                                                                                                                                                                                                                                                                                                                                                                                                                                                                                                                                                                                                                                                                                                                                                                               | 2.95172  | -0.98677 |          |         |   |         |         |          |   |         |         |          |   |         |         |          |   |         |          |          |   |         |          |          |   |         |         |          |   |         |          |         |   |         |          |          |   |          |         |          |   |         |          |         |   |         |          |         |   |          |          |         |   |          |          |         |   |          |          |         |   |          |          |         |   |          |          |          |   |          |          |         |   |          |          |          |   |          |          |          |   |         |          |         |   |         |          |          |   |         |         |          |   |         |          |         |   |          |         |          |
| C                                              | 1.46441                                                                                                                                                                                                                                                                                                                                                                                                                                                                                                                                                                                                                                                                                                                                                                                                                                                                                                                                                                                                                                                                                                                                                                                                                                                                                                                                                                                                                                                                                                                                                                                                                                                                                                                                                                                                                                                                                               | -2.34418 | 0.20107  |          |         |   |         |         |          |   |         |         |          |   |         |         |          |   |         |          |          |   |         |          |          |   |         |         |          |   |         |          |         |   |         |          |          |   |          |         |          |   |         |          |         |   |         |          |         |   |          |          |         |   |          |          |         |   |          |          |         |   |          |          |         |   |          |          |          |   |          |          |         |   |          |          |          |   |          |          |          |   |         |          |         |   |         |          |          |   |         |         |          |   |         |          |         |   |          |         |          |
| C                                              | 0.44292                                                                                                                                                                                                                                                                                                                                                                                                                                                                                                                                                                                                                                                                                                                                                                                                                                                                                                                                                                                                                                                                                                                                                                                                                                                                                                                                                                                                                                                                                                                                                                                                                                                                                                                                                                                                                                                                                               | -0.13404 | -0.47655 |          |         |   |         |         |          |   |         |         |          |   |         |         |          |   |         |          |          |   |         |          |          |   |         |         |          |   |         |          |         |   |         |          |          |   |          |         |          |   |         |          |         |   |         |          |         |   |          |          |         |   |          |          |         |   |          |          |         |   |          |          |         |   |          |          |          |   |          |          |         |   |          |          |          |   |          |          |          |   |         |          |         |   |         |          |          |   |         |         |          |   |         |          |         |   |          |         |          |
| O                                              | -0.45600                                                                                                                                                                                                                                                                                                                                                                                                                                                                                                                                                                                                                                                                                                                                                                                                                                                                                                                                                                                                                                                                                                                                                                                                                                                                                                                                                                                                                                                                                                                                                                                                                                                                                                                                                                                                                                                                                              | 0.68870  | -0.64236 |          |         |   |         |         |          |   |         |         |          |   |         |         |          |   |         |          |          |   |         |          |          |   |         |         |          |   |         |          |         |   |         |          |          |   |          |         |          |   |         |          |         |   |         |          |         |   |          |          |         |   |          |          |         |   |          |          |         |   |          |          |         |   |          |          |          |   |          |          |         |   |          |          |          |   |          |          |          |   |         |          |         |   |         |          |          |   |         |         |          |   |         |          |         |   |          |         |          |
| C                                              | 3.23400                                                                                                                                                                                                                                                                                                                                                                                                                                                                                                                                                                                                                                                                                                                                                                                                                                                                                                                                                                                                                                                                                                                                                                                                                                                                                                                                                                                                                                                                                                                                                                                                                                                                                                                                                                                                                                                                                               | -2.24464 | 1.94471  |          |         |   |         |         |          |   |         |         |          |   |         |         |          |   |         |          |          |   |         |          |          |   |         |         |          |   |         |          |         |   |         |          |          |   |          |         |          |   |         |          |         |   |         |          |         |   |          |          |         |   |          |          |         |   |          |          |         |   |          |          |         |   |          |          |          |   |          |          |         |   |          |          |          |   |          |          |          |   |         |          |         |   |         |          |          |   |         |         |          |   |         |          |         |   |          |         |          |
| C                                              | 0.52761                                                                                                                                                                                                                                                                                                                                                                                                                                                                                                                                                                                                                                                                                                                                                                                                                                                                                                                                                                                                                                                                                                                                                                                                                                                                                                                                                                                                                                                                                                                                                                                                                                                                                                                                                                                                                                                                                               | -1.17148 | 0.55200  |          |         |   |         |         |          |   |         |         |          |   |         |         |          |   |         |          |          |   |         |          |          |   |         |         |          |   |         |          |         |   |         |          |          |   |          |         |          |   |         |          |         |   |         |          |         |   |          |          |         |   |          |          |         |   |          |          |         |   |          |          |         |   |          |          |          |   |          |          |         |   |          |          |          |   |          |          |          |   |         |          |         |   |         |          |          |   |         |         |          |   |         |          |         |   |          |         |          |
| C                                              | -0.82909                                                                                                                                                                                                                                                                                                                                                                                                                                                                                                                                                                                                                                                                                                                                                                                                                                                                                                                                                                                                                                                                                                                                                                                                                                                                                                                                                                                                                                                                                                                                                                                                                                                                                                                                                                                                                                                                                              | -1.50370 | 1.21905  |          |         |   |         |         |          |   |         |         |          |   |         |         |          |   |         |          |          |   |         |          |          |   |         |         |          |   |         |          |         |   |         |          |          |   |          |         |          |   |         |          |         |   |         |          |         |   |          |          |         |   |          |          |         |   |          |          |         |   |          |          |         |   |          |          |          |   |          |          |         |   |          |          |          |   |          |          |          |   |         |          |         |   |         |          |          |   |         |         |          |   |         |          |         |   |          |         |          |
| C                                              | -1.98636                                                                                                                                                                                                                                                                                                                                                                                                                                                                                                                                                                                                                                                                                                                                                                                                                                                                                                                                                                                                                                                                                                                                                                                                                                                                                                                                                                                                                                                                                                                                                                                                                                                                                                                                                                                                                                                                                              | -1.95506 | 0.32856  |          |         |   |         |         |          |   |         |         |          |   |         |         |          |   |         |          |          |   |         |          |          |   |         |         |          |   |         |          |         |   |         |          |          |   |          |         |          |   |         |          |         |   |         |          |         |   |          |          |         |   |          |          |         |   |          |          |         |   |          |          |         |   |          |          |          |   |          |          |         |   |          |          |          |   |          |          |          |   |         |          |         |   |         |          |          |   |         |         |          |   |         |          |         |   |          |         |          |
| O                                              | -1.30988                                                                                                                                                                                                                                                                                                                                                                                                                                                                                                                                                                                                                                                                                                                                                                                                                                                                                                                                                                                                                                                                                                                                                                                                                                                                                                                                                                                                                                                                                                                                                                                                                                                                                                                                                                                                                                                                                              | -0.41896 | 2.03509  |          |         |   |         |         |          |   |         |         |          |   |         |         |          |   |         |          |          |   |         |          |          |   |         |         |          |   |         |          |         |   |         |          |          |   |          |         |          |   |         |          |         |   |         |          |         |   |          |          |         |   |          |          |         |   |          |          |         |   |          |          |         |   |          |          |          |   |          |          |         |   |          |          |          |   |          |          |          |   |         |          |         |   |         |          |          |   |         |         |          |   |         |          |         |   |          |         |          |
| C                                              | -3.27022                                                                                                                                                                                                                                                                                                                                                                                                                                                                                                                                                                                                                                                                                                                                                                                                                                                                                                                                                                                                                                                                                                                                                                                                                                                                                                                                                                                                                                                                                                                                                                                                                                                                                                                                                                                                                                                                                              | -2.05805 | 0.88898  |          |         |   |         |         |          |   |         |         |          |   |         |         |          |   |         |          |          |   |         |          |          |   |         |         |          |   |         |          |         |   |         |          |          |   |          |         |          |   |         |          |         |   |         |          |         |   |          |          |         |   |          |          |         |   |          |          |         |   |          |          |         |   |          |          |          |   |          |          |         |   |          |          |          |   |          |          |          |   |         |          |         |   |         |          |          |   |         |         |          |   |         |          |         |   |          |         |          |
| C                                              | -1.81725                                                                                                                                                                                                                                                                                                                                                                                                                                                                                                                                                                                                                                                                                                                                                                                                                                                                                                                                                                                                                                                                                                                                                                                                                                                                                                                                                                                                                                                                                                                                                                                                                                                                                                                                                                                                                                                                                              | -2.35004 | -1.00304 |          |         |   |         |         |          |   |         |         |          |   |         |         |          |   |         |          |          |   |         |          |          |   |         |         |          |   |         |          |         |   |         |          |          |   |          |         |          |   |         |          |         |   |         |          |         |   |          |          |         |   |          |          |         |   |          |          |         |   |          |          |         |   |          |          |          |   |          |          |         |   |          |          |          |   |          |          |          |   |         |          |         |   |         |          |          |   |         |         |          |   |         |          |         |   |          |         |          |
| C                                              | -4.34838                                                                                                                                                                                                                                                                                                                                                                                                                                                                                                                                                                                                                                                                                                                                                                                                                                                                                                                                                                                                                                                                                                                                                                                                                                                                                                                                                                                                                                                                                                                                                                                                                                                                                                                                                                                                                                                                                              | -2.52963 | 0.13988  |          |         |   |         |         |          |   |         |         |          |   |         |         |          |   |         |          |          |   |         |          |          |   |         |         |          |   |         |          |         |   |         |          |          |   |          |         |          |   |         |          |         |   |         |          |         |   |          |          |         |   |          |          |         |   |          |          |         |   |          |          |         |   |          |          |          |   |          |          |         |   |          |          |          |   |          |          |          |   |         |          |         |   |         |          |          |   |         |         |          |   |         |          |         |   |          |         |          |
| C                                              | -2.89365                                                                                                                                                                                                                                                                                                                                                                                                                                                                                                                                                                                                                                                                                                                                                                                                                                                                                                                                                                                                                                                                                                                                                                                                                                                                                                                                                                                                                                                                                                                                                                                                                                                                                                                                                                                                                                                                                              | -2.82680 | -1.75742 |          |         |   |         |         |          |   |         |         |          |   |         |         |          |   |         |          |          |   |         |          |          |   |         |         |          |   |         |          |         |   |         |          |          |   |          |         |          |   |         |          |         |   |         |          |         |   |          |          |         |   |          |          |         |   |          |          |         |   |          |          |         |   |          |          |          |   |          |          |         |   |          |          |          |   |          |          |          |   |         |          |         |   |         |          |          |   |         |         |          |   |         |          |         |   |          |         |          |
| C                                              | -4.16496                                                                                                                                                                                                                                                                                                                                                                                                                                                                                                                                                                                                                                                                                                                                                                                                                                                                                                                                                                                                                                                                                                                                                                                                                                                                                                                                                                                                                                                                                                                                                                                                                                                                                                                                                                                                                                                                                              | -2.91661 | -1.19052 |          |         |   |         |         |          |   |         |         |          |   |         |         |          |   |         |          |          |   |         |          |          |   |         |         |          |   |         |          |         |   |         |          |          |   |          |         |          |   |         |          |         |   |         |          |         |   |          |          |         |   |          |          |         |   |          |          |         |   |          |          |         |   |          |          |          |   |          |          |         |   |          |          |          |   |          |          |          |   |         |          |         |   |         |          |          |   |         |         |          |   |         |          |         |   |          |         |          |
| H                                              | 1.05146                                                                                                                                                                                                                                                                                                                                                                                                                                                                                                                                                                                                                                                                                                                                                                                                                                                                                                                                                                                                                                                                                                                                                                                                                                                                                                                                                                                                                                                                                                                                                                                                                                                                                                                                                                                                                                                                                               | -0.51651 | 1.63089  |          |         |   |         |         |          |   |         |         |          |   |         |         |          |   |         |          |          |   |         |          |          |   |         |         |          |   |         |          |         |   |         |          |          |   |          |         |          |   |         |          |         |   |         |          |         |   |          |          |         |   |          |          |         |   |          |          |         |   |          |          |         |   |          |          |          |   |          |          |         |   |          |          |          |   |          |          |          |   |         |          |         |   |         |          |          |   |         |         |          |   |         |          |         |   |          |         |          |
| O                                              | 1.56490                                                                                                                                                                                                                                                                                                                                                                                                                                                                                                                                                                                                                                                                                                                                                                                                                                                                                                                                                                                                                                                                                                                                                                                                                                                                                                                                                                                                                                                                                                                                                                                                                                                                                                                                                                                                                                                                                               | -0.07959 | -1.28103 |          |         |   |         |         |          |   |         |         |          |   |         |         |          |   |         |          |          |   |         |          |          |   |         |         |          |   |         |          |         |   |         |          |          |   |          |         |          |   |         |          |         |   |         |          |         |   |          |          |         |   |          |          |         |   |          |          |         |   |          |          |         |   |          |          |          |   |          |          |         |   |          |          |          |   |          |          |          |   |         |          |         |   |         |          |          |   |         |         |          |   |         |          |         |   |          |         |          |
| C                                              | 1.54396                                                                                                                                                                                                                                                                                                                                                                                                                                                                                                                                                                                                                                                                                                                                                                                                                                                                                                                                                                                                                                                                                                                                                                                                                                                                                                                                                                                                                                                                                                                                                                                                                                                                                                                                                                                                                                                                                               | 0.92751  | -2.29870 |          |         |   |         |         |          |   |         |         |          |   |         |         |          |   |         |          |          |   |         |          |          |   |         |         |          |   |         |          |         |   |         |          |          |   |          |         |          |   |         |          |         |   |         |          |         |   |          |          |         |   |          |          |         |   |          |          |         |   |          |          |         |   |          |          |          |   |          |          |         |   |          |          |          |   |          |          |          |   |         |          |         |   |         |          |          |   |         |         |          |   |         |          |         |   |          |         |          |
| C                                              | 1.06117                                                                                                                                                                                                                                                                                                                                                                                                                                                                                                                                                                                                                                                                                                                                                                                                                                                                                                                                                                                                                                                                                                                                                                                                                                                                                                                                                                                                                                                                                                                                                                                                                                                                                                                                                                                                                                                                                               | -3.72893 | 0.71410  |          |         |   |         |         |          |   |         |         |          |   |         |         |          |   |         |          |          |   |         |          |          |   |         |         |          |   |         |          |         |   |         |          |          |   |          |         |          |   |         |          |         |   |         |          |         |   |          |          |         |   |          |          |         |   |          |          |         |   |          |          |         |   |          |          |          |   |          |          |         |   |          |          |          |   |          |          |          |   |         |          |         |   |         |          |          |   |         |         |          |   |         |          |         |   |          |         |          |
| C                                              | -4.38401                                                                                                                                                                                                                                                                                                                                                                                                                                                                                                                                                                                                                                                                                                                                                                                                                                                                                                                                                                                                                                                                                                                                                                                                                                                                                                                                                                                                                                                                                                                                                                                                                                                                                                                                                                                                                                                                                              | 1.42036  | -0.94680 |          |         |   |         |         |          |   |         |         |          |   |         |         |          |   |         |          |          |   |         |          |          |   |         |         |          |   |         |          |         |   |         |          |          |   |          |         |          |   |         |          |         |   |         |          |         |   |          |          |         |   |          |          |         |   |          |          |         |   |          |          |         |   |          |          |          |   |          |          |         |   |          |          |          |   |          |          |          |   |         |          |         |   |         |          |          |   |         |         |          |   |         |          |         |   |          |         |          |



|   |          |          |          |
|---|----------|----------|----------|
| O | -5.47732 | 1.42970  | -1.52040 |
| C | -4.31898 | 1.58185  | 0.58052  |
| N | -3.01146 | 1.82934  | 1.14995  |
| C | -2.54140 | 3.09627  | 1.30332  |
| O | -3.19319 | 4.09873  | 0.99818  |
| C | -1.15530 | 3.20021  | 1.91829  |
| N | -3.20827 | 1.24984  | -1.58500 |
| C | -3.16126 | 0.99213  | -3.01200 |
| H | -2.73502 | -3.12431 | -2.79110 |
| H | -5.00364 | -3.28280 | -1.77647 |
| H | -5.33316 | -2.59697 | 0.59550  |
| H | -3.41667 | -1.76180 | 1.92316  |
| H | -0.83768 | -2.28068 | -1.46692 |
| H | 0.09696  | -4.02343 | 0.29017  |
| H | 0.97669  | -3.77706 | 1.80336  |
| H | 1.81010  | -4.46334 | 0.39816  |
| H | 3.22588  | -3.30123 | 2.23566  |
| H | -0.63112 | -2.34335 | 1.90104  |
| H | 2.57800  | -1.65797 | 2.59652  |
| H | 4.25991  | -1.87315 | 2.03228  |
| H | 1.55906  | -2.41988 | -0.88582 |
| H | 3.75008  | -0.91852 | -0.16265 |
| H | 3.78234  | 1.61526  | 0.25060  |
| H | 7.25142  | 3.00482  | -0.52111 |
| H | 6.35858  | 3.27394  | -2.02937 |
| H | 5.60494  | 3.65749  | -0.47296 |
| H | 5.80593  | -1.63692 | -1.52600 |
| H | -0.62694 | 2.24573  | 1.93267  |
| H | -1.24564 | 3.57408  | 2.94488  |
| H | -0.57235 | 3.93289  | 1.35256  |
| H | -2.40833 | 1.03519  | 1.38537  |
| H | -4.98367 | 2.40951  | 0.83781  |
| H | -4.73279 | 0.66653  | 1.01658  |
| H | -2.35009 | 1.14277  | -1.05080 |
| H | -2.11504 | 0.97661  | -3.32484 |
| H | -3.62301 | 0.02905  | -3.26270 |
| H | 2.49618  | 0.83645  | -2.82449 |
| H | 0.71620  | 0.76566  | -2.99522 |
| H | 1.44554  | 1.92627  | -1.86447 |
| H | -3.68983 | 1.77625  | -3.56332 |
| O | 1.19703  | 0.03051  | 2.77367  |
| H | -0.50913 | -0.09276 | 2.52973  |
| C | 1.96101  | 1.19342  | 2.66646  |
| H | 3.04813  | 0.99573  | 2.75484  |
| H | 1.70819  | 1.91637  | 3.46040  |
| H | 1.80917  | 1.72427  | 1.70439  |
| H | 7.17258  | 0.46727  | -1.97282 |

Optimized Molecular Properties for **T6-INT3**

|                                                |                                                                                                                                                                                                                                                                                                                                                                                                                                                                                                                                                                                                                                                                                                                                                                                                                                                                                                                                                                                                                                                                                                                                                                                                                                                                                                                                                                                                                                                                                                                                                                                                                                                                                                                                                                                                                                                                                                                                                                  |          |          |         |          |   |         |          |         |   |         |          |         |   |         |          |         |   |         |         |          |   |         |         |         |   |         |          |         |   |         |         |         |   |         |          |         |   |          |          |         |   |         |         |          |   |         |         |          |   |          |         |          |   |          |         |          |   |          |         |          |   |          |         |          |   |          |         |         |   |          |         |          |   |          |         |         |   |          |         |         |   |         |          |          |   |         |          |         |   |         |          |         |   |         |         |         |   |          |          |         |   |          |          |         |
|------------------------------------------------|------------------------------------------------------------------------------------------------------------------------------------------------------------------------------------------------------------------------------------------------------------------------------------------------------------------------------------------------------------------------------------------------------------------------------------------------------------------------------------------------------------------------------------------------------------------------------------------------------------------------------------------------------------------------------------------------------------------------------------------------------------------------------------------------------------------------------------------------------------------------------------------------------------------------------------------------------------------------------------------------------------------------------------------------------------------------------------------------------------------------------------------------------------------------------------------------------------------------------------------------------------------------------------------------------------------------------------------------------------------------------------------------------------------------------------------------------------------------------------------------------------------------------------------------------------------------------------------------------------------------------------------------------------------------------------------------------------------------------------------------------------------------------------------------------------------------------------------------------------------------------------------------------------------------------------------------------------------|----------|----------|---------|----------|---|---------|----------|---------|---|---------|----------|---------|---|---------|----------|---------|---|---------|---------|----------|---|---------|---------|---------|---|---------|----------|---------|---|---------|---------|---------|---|---------|----------|---------|---|----------|----------|---------|---|---------|---------|----------|---|---------|---------|----------|---|----------|---------|----------|---|----------|---------|----------|---|----------|---------|----------|---|----------|---------|----------|---|----------|---------|---------|---|----------|---------|----------|---|----------|---------|---------|---|----------|---------|---------|---|---------|----------|----------|---|---------|----------|---------|---|---------|----------|---------|---|---------|---------|---------|---|----------|----------|---------|---|----------|----------|---------|
| Number of<br>(-)<br>Vibrational<br>Frequencies | 0                                                                                                                                                                                                                                                                                                                                                                                                                                                                                                                                                                                                                                                                                                                                                                                                                                                                                                                                                                                                                                                                                                                                                                                                                                                                                                                                                                                                                                                                                                                                                                                                                                                                                                                                                                                                                                                                                                                                                                |          |          |         |          |   |         |          |         |   |         |          |         |   |         |          |         |   |         |         |          |   |         |         |         |   |         |          |         |   |         |         |         |   |         |          |         |   |          |          |         |   |         |         |          |   |         |         |          |   |          |         |          |   |          |         |          |   |          |         |          |   |          |         |          |   |          |         |         |   |          |         |          |   |          |         |         |   |          |         |         |   |         |          |          |   |         |          |         |   |         |          |         |   |         |         |         |   |          |          |         |   |          |          |         |
| Absolute<br>Energies<br>(Hartrees)             | <p><b>B3LYP/6-31G(d) (PCM)</b></p> <p>There are 20 positive frequencies below 100 cm<sup>-1</sup>.</p> <p>Zero-point correction: 0.609671 hartree<br/>         Enthalpy correction: 0.651850 hartree<br/>         Free Energy correction: 0.533915 hartree<br/>         Quasiharmonic Free Energy correction: 0.545371 hartree</p> <p>SCF Energy: -1644.891936 hartree<br/>         SCF Energy + ZPVE: -1644.282265 hartree<br/>         Enthalpy: -1644.240086 hartree<br/>         Free Energy: -1644.358021 hartree</p> <p>Free Energy with quasiharmonic correction: -1644.346565 hartree<br/>         (correction: 7.19 kcal/mol)</p> <p><b>B3LYP-D3/6-311+G(d,p) (PCM)</b></p> <p>SCF Done: E(RB3LYP) = -1645.49380273 A.U.</p>                                                                                                                                                                                                                                                                                                                                                                                                                                                                                                                                                                                                                                                                                                                                                                                                                                                                                                                                                                                                                                                                                                                                                                                                                            |          |          |         |          |   |         |          |         |   |         |          |         |   |         |          |         |   |         |         |          |   |         |         |         |   |         |          |         |   |         |         |         |   |         |          |         |   |          |          |         |   |         |         |          |   |         |         |          |   |          |         |          |   |          |         |          |   |          |         |          |   |          |         |          |   |          |         |         |   |          |         |          |   |          |         |         |   |          |         |         |   |         |          |          |   |         |          |         |   |         |          |         |   |         |         |         |   |          |          |         |   |          |          |         |
| Cartesian<br>Coordinates                       | <p>(PCM)</p> <p>72</p> <p>spD3-INT3-T6.out Energy: -1032562.9423939</p> <table> <tr><td>O</td><td>2.83959</td><td>2.18417</td><td>-0.49936</td></tr> <tr><td>C</td><td>5.85723</td><td>-1.35567</td><td>0.72960</td></tr> <tr><td>C</td><td>4.63086</td><td>-0.75613</td><td>0.62689</td></tr> <tr><td>N</td><td>6.75545</td><td>-0.44267</td><td>0.19027</td></tr> <tr><td>C</td><td>6.10268</td><td>0.65536</td><td>-0.21904</td></tr> <tr><td>N</td><td>4.81244</td><td>0.48006</td><td>0.03974</td></tr> <tr><td>C</td><td>6.27445</td><td>-2.67993</td><td>1.27440</td></tr> <tr><td>C</td><td>1.62087</td><td>2.12001</td><td>0.39360</td></tr> <tr><td>C</td><td>0.45011</td><td>-0.09250</td><td>0.70026</td></tr> <tr><td>O</td><td>-0.46197</td><td>-0.94103</td><td>0.62668</td></tr> <tr><td>C</td><td>2.64511</td><td>2.55971</td><td>-1.85833</td></tr> <tr><td>C</td><td>0.57665</td><td>1.12234</td><td>-0.00420</td></tr> <tr><td>C</td><td>-0.55089</td><td>1.55282</td><td>-0.92968</td></tr> <tr><td>C</td><td>-1.85906</td><td>2.04032</td><td>-0.29408</td></tr> <tr><td>O</td><td>-0.94755</td><td>0.55236</td><td>-1.90554</td></tr> <tr><td>C</td><td>-2.85007</td><td>2.57586</td><td>-1.13289</td></tr> <tr><td>C</td><td>-2.10133</td><td>2.01196</td><td>1.08193</td></tr> <tr><td>C</td><td>-4.04826</td><td>3.06495</td><td>-0.61179</td></tr> <tr><td>C</td><td>-3.30062</td><td>2.49919</td><td>1.61056</td></tr> <tr><td>C</td><td>-4.27875</td><td>3.02702</td><td>0.76711</td></tr> <tr><td>H</td><td>1.61756</td><td>-0.14693</td><td>-1.40075</td></tr> <tr><td>O</td><td>1.54348</td><td>-0.38660</td><td>1.55428</td></tr> <tr><td>C</td><td>1.31045</td><td>-1.44420</td><td>2.48284</td></tr> <tr><td>C</td><td>1.15176</td><td>3.56312</td><td>0.61216</td></tr> <tr><td>C</td><td>-4.33045</td><td>-1.30340</td><td>1.00572</td></tr> <tr><td>O</td><td>-5.40288</td><td>-1.34930</td><td>1.61704</td></tr> </table> | O        | 2.83959  | 2.18417 | -0.49936 | C | 5.85723 | -1.35567 | 0.72960 | C | 4.63086 | -0.75613 | 0.62689 | N | 6.75545 | -0.44267 | 0.19027 | C | 6.10268 | 0.65536 | -0.21904 | N | 4.81244 | 0.48006 | 0.03974 | C | 6.27445 | -2.67993 | 1.27440 | C | 1.62087 | 2.12001 | 0.39360 | C | 0.45011 | -0.09250 | 0.70026 | O | -0.46197 | -0.94103 | 0.62668 | C | 2.64511 | 2.55971 | -1.85833 | C | 0.57665 | 1.12234 | -0.00420 | C | -0.55089 | 1.55282 | -0.92968 | C | -1.85906 | 2.04032 | -0.29408 | O | -0.94755 | 0.55236 | -1.90554 | C | -2.85007 | 2.57586 | -1.13289 | C | -2.10133 | 2.01196 | 1.08193 | C | -4.04826 | 3.06495 | -0.61179 | C | -3.30062 | 2.49919 | 1.61056 | C | -4.27875 | 3.02702 | 0.76711 | H | 1.61756 | -0.14693 | -1.40075 | O | 1.54348 | -0.38660 | 1.55428 | C | 1.31045 | -1.44420 | 2.48284 | C | 1.15176 | 3.56312 | 0.61216 | C | -4.33045 | -1.30340 | 1.00572 | O | -5.40288 | -1.34930 | 1.61704 |
| O                                              | 2.83959                                                                                                                                                                                                                                                                                                                                                                                                                                                                                                                                                                                                                                                                                                                                                                                                                                                                                                                                                                                                                                                                                                                                                                                                                                                                                                                                                                                                                                                                                                                                                                                                                                                                                                                                                                                                                                                                                                                                                          | 2.18417  | -0.49936 |         |          |   |         |          |         |   |         |          |         |   |         |          |         |   |         |         |          |   |         |         |         |   |         |          |         |   |         |         |         |   |         |          |         |   |          |          |         |   |         |         |          |   |         |         |          |   |          |         |          |   |          |         |          |   |          |         |          |   |          |         |          |   |          |         |         |   |          |         |          |   |          |         |         |   |          |         |         |   |         |          |          |   |         |          |         |   |         |          |         |   |         |         |         |   |          |          |         |   |          |          |         |
| C                                              | 5.85723                                                                                                                                                                                                                                                                                                                                                                                                                                                                                                                                                                                                                                                                                                                                                                                                                                                                                                                                                                                                                                                                                                                                                                                                                                                                                                                                                                                                                                                                                                                                                                                                                                                                                                                                                                                                                                                                                                                                                          | -1.35567 | 0.72960  |         |          |   |         |          |         |   |         |          |         |   |         |          |         |   |         |         |          |   |         |         |         |   |         |          |         |   |         |         |         |   |         |          |         |   |          |          |         |   |         |         |          |   |         |         |          |   |          |         |          |   |          |         |          |   |          |         |          |   |          |         |          |   |          |         |         |   |          |         |          |   |          |         |         |   |          |         |         |   |         |          |          |   |         |          |         |   |         |          |         |   |         |         |         |   |          |          |         |   |          |          |         |
| C                                              | 4.63086                                                                                                                                                                                                                                                                                                                                                                                                                                                                                                                                                                                                                                                                                                                                                                                                                                                                                                                                                                                                                                                                                                                                                                                                                                                                                                                                                                                                                                                                                                                                                                                                                                                                                                                                                                                                                                                                                                                                                          | -0.75613 | 0.62689  |         |          |   |         |          |         |   |         |          |         |   |         |          |         |   |         |         |          |   |         |         |         |   |         |          |         |   |         |         |         |   |         |          |         |   |          |          |         |   |         |         |          |   |         |         |          |   |          |         |          |   |          |         |          |   |          |         |          |   |          |         |          |   |          |         |         |   |          |         |          |   |          |         |         |   |          |         |         |   |         |          |          |   |         |          |         |   |         |          |         |   |         |         |         |   |          |          |         |   |          |          |         |
| N                                              | 6.75545                                                                                                                                                                                                                                                                                                                                                                                                                                                                                                                                                                                                                                                                                                                                                                                                                                                                                                                                                                                                                                                                                                                                                                                                                                                                                                                                                                                                                                                                                                                                                                                                                                                                                                                                                                                                                                                                                                                                                          | -0.44267 | 0.19027  |         |          |   |         |          |         |   |         |          |         |   |         |          |         |   |         |         |          |   |         |         |         |   |         |          |         |   |         |         |         |   |         |          |         |   |          |          |         |   |         |         |          |   |         |         |          |   |          |         |          |   |          |         |          |   |          |         |          |   |          |         |          |   |          |         |         |   |          |         |          |   |          |         |         |   |          |         |         |   |         |          |          |   |         |          |         |   |         |          |         |   |         |         |         |   |          |          |         |   |          |          |         |
| C                                              | 6.10268                                                                                                                                                                                                                                                                                                                                                                                                                                                                                                                                                                                                                                                                                                                                                                                                                                                                                                                                                                                                                                                                                                                                                                                                                                                                                                                                                                                                                                                                                                                                                                                                                                                                                                                                                                                                                                                                                                                                                          | 0.65536  | -0.21904 |         |          |   |         |          |         |   |         |          |         |   |         |          |         |   |         |         |          |   |         |         |         |   |         |          |         |   |         |         |         |   |         |          |         |   |          |          |         |   |         |         |          |   |         |         |          |   |          |         |          |   |          |         |          |   |          |         |          |   |          |         |          |   |          |         |         |   |          |         |          |   |          |         |         |   |          |         |         |   |         |          |          |   |         |          |         |   |         |          |         |   |         |         |         |   |          |          |         |   |          |          |         |
| N                                              | 4.81244                                                                                                                                                                                                                                                                                                                                                                                                                                                                                                                                                                                                                                                                                                                                                                                                                                                                                                                                                                                                                                                                                                                                                                                                                                                                                                                                                                                                                                                                                                                                                                                                                                                                                                                                                                                                                                                                                                                                                          | 0.48006  | 0.03974  |         |          |   |         |          |         |   |         |          |         |   |         |          |         |   |         |         |          |   |         |         |         |   |         |          |         |   |         |         |         |   |         |          |         |   |          |          |         |   |         |         |          |   |         |         |          |   |          |         |          |   |          |         |          |   |          |         |          |   |          |         |          |   |          |         |         |   |          |         |          |   |          |         |         |   |          |         |         |   |         |          |          |   |         |          |         |   |         |          |         |   |         |         |         |   |          |          |         |   |          |          |         |
| C                                              | 6.27445                                                                                                                                                                                                                                                                                                                                                                                                                                                                                                                                                                                                                                                                                                                                                                                                                                                                                                                                                                                                                                                                                                                                                                                                                                                                                                                                                                                                                                                                                                                                                                                                                                                                                                                                                                                                                                                                                                                                                          | -2.67993 | 1.27440  |         |          |   |         |          |         |   |         |          |         |   |         |          |         |   |         |         |          |   |         |         |         |   |         |          |         |   |         |         |         |   |         |          |         |   |          |          |         |   |         |         |          |   |         |         |          |   |          |         |          |   |          |         |          |   |          |         |          |   |          |         |          |   |          |         |         |   |          |         |          |   |          |         |         |   |          |         |         |   |         |          |          |   |         |          |         |   |         |          |         |   |         |         |         |   |          |          |         |   |          |          |         |
| C                                              | 1.62087                                                                                                                                                                                                                                                                                                                                                                                                                                                                                                                                                                                                                                                                                                                                                                                                                                                                                                                                                                                                                                                                                                                                                                                                                                                                                                                                                                                                                                                                                                                                                                                                                                                                                                                                                                                                                                                                                                                                                          | 2.12001  | 0.39360  |         |          |   |         |          |         |   |         |          |         |   |         |          |         |   |         |         |          |   |         |         |         |   |         |          |         |   |         |         |         |   |         |          |         |   |          |          |         |   |         |         |          |   |         |         |          |   |          |         |          |   |          |         |          |   |          |         |          |   |          |         |          |   |          |         |         |   |          |         |          |   |          |         |         |   |          |         |         |   |         |          |          |   |         |          |         |   |         |          |         |   |         |         |         |   |          |          |         |   |          |          |         |
| C                                              | 0.45011                                                                                                                                                                                                                                                                                                                                                                                                                                                                                                                                                                                                                                                                                                                                                                                                                                                                                                                                                                                                                                                                                                                                                                                                                                                                                                                                                                                                                                                                                                                                                                                                                                                                                                                                                                                                                                                                                                                                                          | -0.09250 | 0.70026  |         |          |   |         |          |         |   |         |          |         |   |         |          |         |   |         |         |          |   |         |         |         |   |         |          |         |   |         |         |         |   |         |          |         |   |          |          |         |   |         |         |          |   |         |         |          |   |          |         |          |   |          |         |          |   |          |         |          |   |          |         |          |   |          |         |         |   |          |         |          |   |          |         |         |   |          |         |         |   |         |          |          |   |         |          |         |   |         |          |         |   |         |         |         |   |          |          |         |   |          |          |         |
| O                                              | -0.46197                                                                                                                                                                                                                                                                                                                                                                                                                                                                                                                                                                                                                                                                                                                                                                                                                                                                                                                                                                                                                                                                                                                                                                                                                                                                                                                                                                                                                                                                                                                                                                                                                                                                                                                                                                                                                                                                                                                                                         | -0.94103 | 0.62668  |         |          |   |         |          |         |   |         |          |         |   |         |          |         |   |         |         |          |   |         |         |         |   |         |          |         |   |         |         |         |   |         |          |         |   |          |          |         |   |         |         |          |   |         |         |          |   |          |         |          |   |          |         |          |   |          |         |          |   |          |         |          |   |          |         |         |   |          |         |          |   |          |         |         |   |          |         |         |   |         |          |          |   |         |          |         |   |         |          |         |   |         |         |         |   |          |          |         |   |          |          |         |
| C                                              | 2.64511                                                                                                                                                                                                                                                                                                                                                                                                                                                                                                                                                                                                                                                                                                                                                                                                                                                                                                                                                                                                                                                                                                                                                                                                                                                                                                                                                                                                                                                                                                                                                                                                                                                                                                                                                                                                                                                                                                                                                          | 2.55971  | -1.85833 |         |          |   |         |          |         |   |         |          |         |   |         |          |         |   |         |         |          |   |         |         |         |   |         |          |         |   |         |         |         |   |         |          |         |   |          |          |         |   |         |         |          |   |         |         |          |   |          |         |          |   |          |         |          |   |          |         |          |   |          |         |          |   |          |         |         |   |          |         |          |   |          |         |         |   |          |         |         |   |         |          |          |   |         |          |         |   |         |          |         |   |         |         |         |   |          |          |         |   |          |          |         |
| C                                              | 0.57665                                                                                                                                                                                                                                                                                                                                                                                                                                                                                                                                                                                                                                                                                                                                                                                                                                                                                                                                                                                                                                                                                                                                                                                                                                                                                                                                                                                                                                                                                                                                                                                                                                                                                                                                                                                                                                                                                                                                                          | 1.12234  | -0.00420 |         |          |   |         |          |         |   |         |          |         |   |         |          |         |   |         |         |          |   |         |         |         |   |         |          |         |   |         |         |         |   |         |          |         |   |          |          |         |   |         |         |          |   |         |         |          |   |          |         |          |   |          |         |          |   |          |         |          |   |          |         |          |   |          |         |         |   |          |         |          |   |          |         |         |   |          |         |         |   |         |          |          |   |         |          |         |   |         |          |         |   |         |         |         |   |          |          |         |   |          |          |         |
| C                                              | -0.55089                                                                                                                                                                                                                                                                                                                                                                                                                                                                                                                                                                                                                                                                                                                                                                                                                                                                                                                                                                                                                                                                                                                                                                                                                                                                                                                                                                                                                                                                                                                                                                                                                                                                                                                                                                                                                                                                                                                                                         | 1.55282  | -0.92968 |         |          |   |         |          |         |   |         |          |         |   |         |          |         |   |         |         |          |   |         |         |         |   |         |          |         |   |         |         |         |   |         |          |         |   |          |          |         |   |         |         |          |   |         |         |          |   |          |         |          |   |          |         |          |   |          |         |          |   |          |         |          |   |          |         |         |   |          |         |          |   |          |         |         |   |          |         |         |   |         |          |          |   |         |          |         |   |         |          |         |   |         |         |         |   |          |          |         |   |          |          |         |
| C                                              | -1.85906                                                                                                                                                                                                                                                                                                                                                                                                                                                                                                                                                                                                                                                                                                                                                                                                                                                                                                                                                                                                                                                                                                                                                                                                                                                                                                                                                                                                                                                                                                                                                                                                                                                                                                                                                                                                                                                                                                                                                         | 2.04032  | -0.29408 |         |          |   |         |          |         |   |         |          |         |   |         |          |         |   |         |         |          |   |         |         |         |   |         |          |         |   |         |         |         |   |         |          |         |   |          |          |         |   |         |         |          |   |         |         |          |   |          |         |          |   |          |         |          |   |          |         |          |   |          |         |          |   |          |         |         |   |          |         |          |   |          |         |         |   |          |         |         |   |         |          |          |   |         |          |         |   |         |          |         |   |         |         |         |   |          |          |         |   |          |          |         |
| O                                              | -0.94755                                                                                                                                                                                                                                                                                                                                                                                                                                                                                                                                                                                                                                                                                                                                                                                                                                                                                                                                                                                                                                                                                                                                                                                                                                                                                                                                                                                                                                                                                                                                                                                                                                                                                                                                                                                                                                                                                                                                                         | 0.55236  | -1.90554 |         |          |   |         |          |         |   |         |          |         |   |         |          |         |   |         |         |          |   |         |         |         |   |         |          |         |   |         |         |         |   |         |          |         |   |          |          |         |   |         |         |          |   |         |         |          |   |          |         |          |   |          |         |          |   |          |         |          |   |          |         |          |   |          |         |         |   |          |         |          |   |          |         |         |   |          |         |         |   |         |          |          |   |         |          |         |   |         |          |         |   |         |         |         |   |          |          |         |   |          |          |         |
| C                                              | -2.85007                                                                                                                                                                                                                                                                                                                                                                                                                                                                                                                                                                                                                                                                                                                                                                                                                                                                                                                                                                                                                                                                                                                                                                                                                                                                                                                                                                                                                                                                                                                                                                                                                                                                                                                                                                                                                                                                                                                                                         | 2.57586  | -1.13289 |         |          |   |         |          |         |   |         |          |         |   |         |          |         |   |         |         |          |   |         |         |         |   |         |          |         |   |         |         |         |   |         |          |         |   |          |          |         |   |         |         |          |   |         |         |          |   |          |         |          |   |          |         |          |   |          |         |          |   |          |         |          |   |          |         |         |   |          |         |          |   |          |         |         |   |          |         |         |   |         |          |          |   |         |          |         |   |         |          |         |   |         |         |         |   |          |          |         |   |          |          |         |
| C                                              | -2.10133                                                                                                                                                                                                                                                                                                                                                                                                                                                                                                                                                                                                                                                                                                                                                                                                                                                                                                                                                                                                                                                                                                                                                                                                                                                                                                                                                                                                                                                                                                                                                                                                                                                                                                                                                                                                                                                                                                                                                         | 2.01196  | 1.08193  |         |          |   |         |          |         |   |         |          |         |   |         |          |         |   |         |         |          |   |         |         |         |   |         |          |         |   |         |         |         |   |         |          |         |   |          |          |         |   |         |         |          |   |         |         |          |   |          |         |          |   |          |         |          |   |          |         |          |   |          |         |          |   |          |         |         |   |          |         |          |   |          |         |         |   |          |         |         |   |         |          |          |   |         |          |         |   |         |          |         |   |         |         |         |   |          |          |         |   |          |          |         |
| C                                              | -4.04826                                                                                                                                                                                                                                                                                                                                                                                                                                                                                                                                                                                                                                                                                                                                                                                                                                                                                                                                                                                                                                                                                                                                                                                                                                                                                                                                                                                                                                                                                                                                                                                                                                                                                                                                                                                                                                                                                                                                                         | 3.06495  | -0.61179 |         |          |   |         |          |         |   |         |          |         |   |         |          |         |   |         |         |          |   |         |         |         |   |         |          |         |   |         |         |         |   |         |          |         |   |          |          |         |   |         |         |          |   |         |         |          |   |          |         |          |   |          |         |          |   |          |         |          |   |          |         |          |   |          |         |         |   |          |         |          |   |          |         |         |   |          |         |         |   |         |          |          |   |         |          |         |   |         |          |         |   |         |         |         |   |          |          |         |   |          |          |         |
| C                                              | -3.30062                                                                                                                                                                                                                                                                                                                                                                                                                                                                                                                                                                                                                                                                                                                                                                                                                                                                                                                                                                                                                                                                                                                                                                                                                                                                                                                                                                                                                                                                                                                                                                                                                                                                                                                                                                                                                                                                                                                                                         | 2.49919  | 1.61056  |         |          |   |         |          |         |   |         |          |         |   |         |          |         |   |         |         |          |   |         |         |         |   |         |          |         |   |         |         |         |   |         |          |         |   |          |          |         |   |         |         |          |   |         |         |          |   |          |         |          |   |          |         |          |   |          |         |          |   |          |         |          |   |          |         |         |   |          |         |          |   |          |         |         |   |          |         |         |   |         |          |          |   |         |          |         |   |         |          |         |   |         |         |         |   |          |          |         |   |          |          |         |
| C                                              | -4.27875                                                                                                                                                                                                                                                                                                                                                                                                                                                                                                                                                                                                                                                                                                                                                                                                                                                                                                                                                                                                                                                                                                                                                                                                                                                                                                                                                                                                                                                                                                                                                                                                                                                                                                                                                                                                                                                                                                                                                         | 3.02702  | 0.76711  |         |          |   |         |          |         |   |         |          |         |   |         |          |         |   |         |         |          |   |         |         |         |   |         |          |         |   |         |         |         |   |         |          |         |   |          |          |         |   |         |         |          |   |         |         |          |   |          |         |          |   |          |         |          |   |          |         |          |   |          |         |          |   |          |         |         |   |          |         |          |   |          |         |         |   |          |         |         |   |         |          |          |   |         |          |         |   |         |          |         |   |         |         |         |   |          |          |         |   |          |          |         |
| H                                              | 1.61756                                                                                                                                                                                                                                                                                                                                                                                                                                                                                                                                                                                                                                                                                                                                                                                                                                                                                                                                                                                                                                                                                                                                                                                                                                                                                                                                                                                                                                                                                                                                                                                                                                                                                                                                                                                                                                                                                                                                                          | -0.14693 | -1.40075 |         |          |   |         |          |         |   |         |          |         |   |         |          |         |   |         |         |          |   |         |         |         |   |         |          |         |   |         |         |         |   |         |          |         |   |          |          |         |   |         |         |          |   |         |         |          |   |          |         |          |   |          |         |          |   |          |         |          |   |          |         |          |   |          |         |         |   |          |         |          |   |          |         |         |   |          |         |         |   |         |          |          |   |         |          |         |   |         |          |         |   |         |         |         |   |          |          |         |   |          |          |         |
| O                                              | 1.54348                                                                                                                                                                                                                                                                                                                                                                                                                                                                                                                                                                                                                                                                                                                                                                                                                                                                                                                                                                                                                                                                                                                                                                                                                                                                                                                                                                                                                                                                                                                                                                                                                                                                                                                                                                                                                                                                                                                                                          | -0.38660 | 1.55428  |         |          |   |         |          |         |   |         |          |         |   |         |          |         |   |         |         |          |   |         |         |         |   |         |          |         |   |         |         |         |   |         |          |         |   |          |          |         |   |         |         |          |   |         |         |          |   |          |         |          |   |          |         |          |   |          |         |          |   |          |         |          |   |          |         |         |   |          |         |          |   |          |         |         |   |          |         |         |   |         |          |          |   |         |          |         |   |         |          |         |   |         |         |         |   |          |          |         |   |          |          |         |
| C                                              | 1.31045                                                                                                                                                                                                                                                                                                                                                                                                                                                                                                                                                                                                                                                                                                                                                                                                                                                                                                                                                                                                                                                                                                                                                                                                                                                                                                                                                                                                                                                                                                                                                                                                                                                                                                                                                                                                                                                                                                                                                          | -1.44420 | 2.48284  |         |          |   |         |          |         |   |         |          |         |   |         |          |         |   |         |         |          |   |         |         |         |   |         |          |         |   |         |         |         |   |         |          |         |   |          |          |         |   |         |         |          |   |         |         |          |   |          |         |          |   |          |         |          |   |          |         |          |   |          |         |          |   |          |         |         |   |          |         |          |   |          |         |         |   |          |         |         |   |         |          |          |   |         |          |         |   |         |          |         |   |         |         |         |   |          |          |         |   |          |          |         |
| C                                              | 1.15176                                                                                                                                                                                                                                                                                                                                                                                                                                                                                                                                                                                                                                                                                                                                                                                                                                                                                                                                                                                                                                                                                                                                                                                                                                                                                                                                                                                                                                                                                                                                                                                                                                                                                                                                                                                                                                                                                                                                                          | 3.56312  | 0.61216  |         |          |   |         |          |         |   |         |          |         |   |         |          |         |   |         |         |          |   |         |         |         |   |         |          |         |   |         |         |         |   |         |          |         |   |          |          |         |   |         |         |          |   |         |         |          |   |          |         |          |   |          |         |          |   |          |         |          |   |          |         |          |   |          |         |         |   |          |         |          |   |          |         |         |   |          |         |         |   |         |          |          |   |         |          |         |   |         |          |         |   |         |         |         |   |          |          |         |   |          |          |         |
| C                                              | -4.33045                                                                                                                                                                                                                                                                                                                                                                                                                                                                                                                                                                                                                                                                                                                                                                                                                                                                                                                                                                                                                                                                                                                                                                                                                                                                                                                                                                                                                                                                                                                                                                                                                                                                                                                                                                                                                                                                                                                                                         | -1.30340 | 1.00572  |         |          |   |         |          |         |   |         |          |         |   |         |          |         |   |         |         |          |   |         |         |         |   |         |          |         |   |         |         |         |   |         |          |         |   |          |          |         |   |         |         |          |   |         |         |          |   |          |         |          |   |          |         |          |   |          |         |          |   |          |         |          |   |          |         |         |   |          |         |          |   |          |         |         |   |          |         |         |   |         |          |          |   |         |          |         |   |         |          |         |   |         |         |         |   |          |          |         |   |          |          |         |
| O                                              | -5.40288                                                                                                                                                                                                                                                                                                                                                                                                                                                                                                                                                                                                                                                                                                                                                                                                                                                                                                                                                                                                                                                                                                                                                                                                                                                                                                                                                                                                                                                                                                                                                                                                                                                                                                                                                                                                                                                                                                                                                         | -1.34930 | 1.61704  |         |          |   |         |          |         |   |         |          |         |   |         |          |         |   |         |         |          |   |         |         |         |   |         |          |         |   |         |         |         |   |         |          |         |   |          |          |         |   |         |         |          |   |         |         |          |   |          |         |          |   |          |         |          |   |          |         |          |   |          |         |          |   |          |         |         |   |          |         |          |   |          |         |         |   |          |         |         |   |         |          |          |   |         |          |         |   |         |          |         |   |         |         |         |   |          |          |         |   |          |          |         |

|   |          |          |          |
|---|----------|----------|----------|
| C | -4.31434 | -0.94858 | -0.48978 |
| N | -3.15243 | -1.37026 | -1.24646 |
| C | -3.07970 | -2.62298 | -1.76479 |
| O | -3.97788 | -3.45943 | -1.63340 |
| C | -1.81710 | -2.93782 | -2.55211 |
| N | -3.13345 | -1.51445 | 1.59123  |
| C | -3.04303 | -1.76152 | 3.01782  |
| H | -3.47013 | 2.46281  | 2.68383  |
| H | -5.21072 | 3.40646  | 1.17775  |
| H | -4.80092 | 3.47739  | -1.27937 |
| H | -2.67618 | 2.60387  | -2.20569 |
| H | -1.34061 | 1.60912  | 1.74273  |
| H | 0.41679  | 3.59029  | 1.42236  |
| H | 0.67478  | 3.99930  | -0.27063 |
| H | 2.00030  | 4.19817  | 0.88989  |
| H | 2.22914  | 3.57113  | -1.93733 |
| H | -0.17675 | 2.41355  | -1.50569 |
| H | 1.99811  | 1.85466  | -2.39086 |
| H | 3.63109  | 2.55362  | -2.33388 |
| H | 2.08942  | 1.77646  | 1.31580  |
| H | 4.02927  | 1.16329  | -0.18385 |
| H | 3.64471  | -1.07702 | 0.92646  |
| H | 6.76693  | -3.28928 | 0.50831  |
| H | 6.96830  | -2.56662 | 2.11486  |
| H | 5.39725  | -3.22508 | 1.62945  |
| H | 6.55282  | 1.52164  | -0.67712 |
| H | -1.10254 | -2.11260 | -2.57068 |
| H | -2.09609 | -3.19491 | -3.57951 |
| H | -1.33677 | -3.81869 | -2.11406 |
| H | -2.36418 | -0.72791 | -1.35785 |
| H | -5.20980 | -1.40162 | -0.92080 |
| H | -4.40779 | 0.13934  | -0.57066 |
| H | -2.26802 | -1.32858 | 1.08315  |
| H | -1.99989 | -1.96664 | 3.26770  |
| H | -3.38849 | -0.89980 | 3.60401  |
| H | 2.25538  | -1.59367 | 3.01271  |
| H | 0.53237  | -1.17452 | 3.20700  |
| H | 1.01067  | -2.36681 | 1.97911  |
| H | -3.65530 | -2.62400 | 3.30076  |
| O | 1.65517  | -0.64869 | -2.24856 |
| H | -0.13136 | 0.09486  | -2.19538 |
| C | 1.85215  | -2.02873 | -1.94056 |
| H | 2.87068  | -2.21721 | -1.57095 |
| H | 1.71286  | -2.59383 | -2.86634 |
| H | 1.13067  | -2.38144 | -1.19466 |
| H | 7.75637  | -0.57672 | 0.11382  |

Optimized Molecular Properties for **T6-TS4**

|                                                |                                                                                                                                                                                                                                                                                                                                                                                                                                                                                                                                                                                                                                                                                                                                                                                                                                                                                                                                                                                                                                                                                                                                                                                                                                                                                                                                                                                                                                                                                                                                                                                                                                                                                                                                                                                                                                                                                                                                                             |          |          |         |          |   |         |          |         |   |         |          |         |   |         |          |         |   |         |         |          |   |         |         |          |   |         |          |         |   |         |         |         |   |         |          |         |   |          |          |         |   |         |         |          |   |         |         |         |   |          |         |          |   |          |         |          |   |          |         |          |   |          |         |          |   |          |         |         |   |          |         |          |   |          |         |         |   |          |         |         |   |         |         |          |   |         |          |         |   |         |          |         |   |         |         |         |   |          |          |         |   |          |          |         |
|------------------------------------------------|-------------------------------------------------------------------------------------------------------------------------------------------------------------------------------------------------------------------------------------------------------------------------------------------------------------------------------------------------------------------------------------------------------------------------------------------------------------------------------------------------------------------------------------------------------------------------------------------------------------------------------------------------------------------------------------------------------------------------------------------------------------------------------------------------------------------------------------------------------------------------------------------------------------------------------------------------------------------------------------------------------------------------------------------------------------------------------------------------------------------------------------------------------------------------------------------------------------------------------------------------------------------------------------------------------------------------------------------------------------------------------------------------------------------------------------------------------------------------------------------------------------------------------------------------------------------------------------------------------------------------------------------------------------------------------------------------------------------------------------------------------------------------------------------------------------------------------------------------------------------------------------------------------------------------------------------------------------|----------|----------|---------|----------|---|---------|----------|---------|---|---------|----------|---------|---|---------|----------|---------|---|---------|---------|----------|---|---------|---------|----------|---|---------|----------|---------|---|---------|---------|---------|---|---------|----------|---------|---|----------|----------|---------|---|---------|---------|----------|---|---------|---------|---------|---|----------|---------|----------|---|----------|---------|----------|---|----------|---------|----------|---|----------|---------|----------|---|----------|---------|---------|---|----------|---------|----------|---|----------|---------|---------|---|----------|---------|---------|---|---------|---------|----------|---|---------|----------|---------|---|---------|----------|---------|---|---------|---------|---------|---|----------|----------|---------|---|----------|----------|---------|
| Number of<br>(-)<br>Vibrational<br>Frequencies | 1 (-137.5699)                                                                                                                                                                                                                                                                                                                                                                                                                                                                                                                                                                                                                                                                                                                                                                                                                                                                                                                                                                                                                                                                                                                                                                                                                                                                                                                                                                                                                                                                                                                                                                                                                                                                                                                                                                                                                                                                                                                                               |          |          |         |          |   |         |          |         |   |         |          |         |   |         |          |         |   |         |         |          |   |         |         |          |   |         |          |         |   |         |         |         |   |         |          |         |   |          |          |         |   |         |         |          |   |         |         |         |   |          |         |          |   |          |         |          |   |          |         |          |   |          |         |          |   |          |         |         |   |          |         |          |   |          |         |         |   |          |         |         |   |         |         |          |   |         |          |         |   |         |          |         |   |         |         |         |   |          |          |         |   |          |          |         |
| Absolute<br>Energies<br>(Hartrees)             | <p><b>B3LYP/6-31G(d) (PCM)</b></p> <p>There are 19 positive frequencies below 100 cm<sup>-1</sup>.</p> <p>Zero-point correction: 0.607974 hartree<br/>         Enthalpy correction: 0.649855 hartree<br/>         Free Energy correction: 0.532316 hartree<br/>         Quasiharmonic Free Energy correction: 0.543808 hartree</p> <p>SCF Energy: -1644.892265 hartree<br/>         SCF Energy + ZPVE: -1644.284291 hartree<br/>         Enthalpy: -1644.242410 hartree<br/>         Free Energy: -1644.359949 hartree</p> <p>Free Energy with quasiharmonic correction: -1644.348457 hartree<br/>         (correction: 7.21 kcal/mol)</p> <p><b>B3LYP-D3/6-311+G(d,p) (PCM)</b></p> <p>SCF Done: E(RB3LYP) = -1645.49201142 A.U.</p>                                                                                                                                                                                                                                                                                                                                                                                                                                                                                                                                                                                                                                                                                                                                                                                                                                                                                                                                                                                                                                                                                                                                                                                                                       |          |          |         |          |   |         |          |         |   |         |          |         |   |         |          |         |   |         |         |          |   |         |         |          |   |         |          |         |   |         |         |         |   |         |          |         |   |          |          |         |   |         |         |          |   |         |         |         |   |          |         |          |   |          |         |          |   |          |         |          |   |          |         |          |   |          |         |         |   |          |         |          |   |          |         |         |   |          |         |         |   |         |         |          |   |         |          |         |   |         |          |         |   |         |         |         |   |          |          |         |   |          |          |         |
| Cartesian<br>Coordinates                       | <p>(PCM)<br/>72</p> <p>spD3-TS4-T6.out Energy: -1032561.8183299</p> <table> <tr><td>O</td><td>2.72686</td><td>1.64597</td><td>-0.96700</td></tr> <tr><td>C</td><td>5.88051</td><td>-1.21139</td><td>1.11207</td></tr> <tr><td>C</td><td>4.65281</td><td>-0.68981</td><td>0.80495</td></tr> <tr><td>N</td><td>6.79526</td><td>-0.40779</td><td>0.44236</td></tr> <tr><td>C</td><td>6.14969</td><td>0.55297</td><td>-0.23643</td></tr> <tr><td>N</td><td>4.84846</td><td>0.39592</td><td>-0.02610</td></tr> <tr><td>C</td><td>6.28500</td><td>-2.37119</td><td>1.95813</td></tr> <tr><td>C</td><td>1.62742</td><td>1.92295</td><td>0.27637</td></tr> <tr><td>C</td><td>0.30938</td><td>-0.11706</td><td>0.81115</td></tr> <tr><td>O</td><td>-0.67873</td><td>-0.87300</td><td>0.84626</td></tr> <tr><td>C</td><td>2.89080</td><td>2.61991</td><td>-1.99566</td></tr> <tr><td>C</td><td>0.43883</td><td>1.11101</td><td>0.12470</td></tr> <tr><td>C</td><td>-0.66595</td><td>1.52863</td><td>-0.82317</td></tr> <tr><td>C</td><td>-1.98903</td><td>1.98885</td><td>-0.20601</td></tr> <tr><td>O</td><td>-0.99619</td><td>0.52444</td><td>-1.81489</td></tr> <tr><td>C</td><td>-3.10652</td><td>2.18798</td><td>-1.03257</td></tr> <tr><td>C</td><td>-2.10359</td><td>2.30830</td><td>1.15053</td></tr> <tr><td>C</td><td>-4.30569</td><td>2.67829</td><td>-0.51329</td></tr> <tr><td>C</td><td>-3.30152</td><td>2.80245</td><td>1.67456</td></tr> <tr><td>C</td><td>-4.40949</td><td>2.98620</td><td>0.84604</td></tr> <tr><td>H</td><td>1.99396</td><td>0.33690</td><td>-1.94558</td></tr> <tr><td>O</td><td>1.44795</td><td>-0.50742</td><td>1.54787</td></tr> <tr><td>C</td><td>1.22805</td><td>-1.58962</td><td>2.45273</td></tr> <tr><td>C</td><td>1.49810</td><td>3.43499</td><td>0.38657</td></tr> <tr><td>C</td><td>-4.60499</td><td>-1.25140</td><td>0.61830</td></tr> <tr><td>O</td><td>-5.76264</td><td>-1.23593</td><td>1.05029</td></tr> </table> | O        | 2.72686  | 1.64597 | -0.96700 | C | 5.88051 | -1.21139 | 1.11207 | C | 4.65281 | -0.68981 | 0.80495 | N | 6.79526 | -0.40779 | 0.44236 | C | 6.14969 | 0.55297 | -0.23643 | N | 4.84846 | 0.39592 | -0.02610 | C | 6.28500 | -2.37119 | 1.95813 | C | 1.62742 | 1.92295 | 0.27637 | C | 0.30938 | -0.11706 | 0.81115 | O | -0.67873 | -0.87300 | 0.84626 | C | 2.89080 | 2.61991 | -1.99566 | C | 0.43883 | 1.11101 | 0.12470 | C | -0.66595 | 1.52863 | -0.82317 | C | -1.98903 | 1.98885 | -0.20601 | O | -0.99619 | 0.52444 | -1.81489 | C | -3.10652 | 2.18798 | -1.03257 | C | -2.10359 | 2.30830 | 1.15053 | C | -4.30569 | 2.67829 | -0.51329 | C | -3.30152 | 2.80245 | 1.67456 | C | -4.40949 | 2.98620 | 0.84604 | H | 1.99396 | 0.33690 | -1.94558 | O | 1.44795 | -0.50742 | 1.54787 | C | 1.22805 | -1.58962 | 2.45273 | C | 1.49810 | 3.43499 | 0.38657 | C | -4.60499 | -1.25140 | 0.61830 | O | -5.76264 | -1.23593 | 1.05029 |
| O                                              | 2.72686                                                                                                                                                                                                                                                                                                                                                                                                                                                                                                                                                                                                                                                                                                                                                                                                                                                                                                                                                                                                                                                                                                                                                                                                                                                                                                                                                                                                                                                                                                                                                                                                                                                                                                                                                                                                                                                                                                                                                     | 1.64597  | -0.96700 |         |          |   |         |          |         |   |         |          |         |   |         |          |         |   |         |         |          |   |         |         |          |   |         |          |         |   |         |         |         |   |         |          |         |   |          |          |         |   |         |         |          |   |         |         |         |   |          |         |          |   |          |         |          |   |          |         |          |   |          |         |          |   |          |         |         |   |          |         |          |   |          |         |         |   |          |         |         |   |         |         |          |   |         |          |         |   |         |          |         |   |         |         |         |   |          |          |         |   |          |          |         |
| C                                              | 5.88051                                                                                                                                                                                                                                                                                                                                                                                                                                                                                                                                                                                                                                                                                                                                                                                                                                                                                                                                                                                                                                                                                                                                                                                                                                                                                                                                                                                                                                                                                                                                                                                                                                                                                                                                                                                                                                                                                                                                                     | -1.21139 | 1.11207  |         |          |   |         |          |         |   |         |          |         |   |         |          |         |   |         |         |          |   |         |         |          |   |         |          |         |   |         |         |         |   |         |          |         |   |          |          |         |   |         |         |          |   |         |         |         |   |          |         |          |   |          |         |          |   |          |         |          |   |          |         |          |   |          |         |         |   |          |         |          |   |          |         |         |   |          |         |         |   |         |         |          |   |         |          |         |   |         |          |         |   |         |         |         |   |          |          |         |   |          |          |         |
| C                                              | 4.65281                                                                                                                                                                                                                                                                                                                                                                                                                                                                                                                                                                                                                                                                                                                                                                                                                                                                                                                                                                                                                                                                                                                                                                                                                                                                                                                                                                                                                                                                                                                                                                                                                                                                                                                                                                                                                                                                                                                                                     | -0.68981 | 0.80495  |         |          |   |         |          |         |   |         |          |         |   |         |          |         |   |         |         |          |   |         |         |          |   |         |          |         |   |         |         |         |   |         |          |         |   |          |          |         |   |         |         |          |   |         |         |         |   |          |         |          |   |          |         |          |   |          |         |          |   |          |         |          |   |          |         |         |   |          |         |          |   |          |         |         |   |          |         |         |   |         |         |          |   |         |          |         |   |         |          |         |   |         |         |         |   |          |          |         |   |          |          |         |
| N                                              | 6.79526                                                                                                                                                                                                                                                                                                                                                                                                                                                                                                                                                                                                                                                                                                                                                                                                                                                                                                                                                                                                                                                                                                                                                                                                                                                                                                                                                                                                                                                                                                                                                                                                                                                                                                                                                                                                                                                                                                                                                     | -0.40779 | 0.44236  |         |          |   |         |          |         |   |         |          |         |   |         |          |         |   |         |         |          |   |         |         |          |   |         |          |         |   |         |         |         |   |         |          |         |   |          |          |         |   |         |         |          |   |         |         |         |   |          |         |          |   |          |         |          |   |          |         |          |   |          |         |          |   |          |         |         |   |          |         |          |   |          |         |         |   |          |         |         |   |         |         |          |   |         |          |         |   |         |          |         |   |         |         |         |   |          |          |         |   |          |          |         |
| C                                              | 6.14969                                                                                                                                                                                                                                                                                                                                                                                                                                                                                                                                                                                                                                                                                                                                                                                                                                                                                                                                                                                                                                                                                                                                                                                                                                                                                                                                                                                                                                                                                                                                                                                                                                                                                                                                                                                                                                                                                                                                                     | 0.55297  | -0.23643 |         |          |   |         |          |         |   |         |          |         |   |         |          |         |   |         |         |          |   |         |         |          |   |         |          |         |   |         |         |         |   |         |          |         |   |          |          |         |   |         |         |          |   |         |         |         |   |          |         |          |   |          |         |          |   |          |         |          |   |          |         |          |   |          |         |         |   |          |         |          |   |          |         |         |   |          |         |         |   |         |         |          |   |         |          |         |   |         |          |         |   |         |         |         |   |          |          |         |   |          |          |         |
| N                                              | 4.84846                                                                                                                                                                                                                                                                                                                                                                                                                                                                                                                                                                                                                                                                                                                                                                                                                                                                                                                                                                                                                                                                                                                                                                                                                                                                                                                                                                                                                                                                                                                                                                                                                                                                                                                                                                                                                                                                                                                                                     | 0.39592  | -0.02610 |         |          |   |         |          |         |   |         |          |         |   |         |          |         |   |         |         |          |   |         |         |          |   |         |          |         |   |         |         |         |   |         |          |         |   |          |          |         |   |         |         |          |   |         |         |         |   |          |         |          |   |          |         |          |   |          |         |          |   |          |         |          |   |          |         |         |   |          |         |          |   |          |         |         |   |          |         |         |   |         |         |          |   |         |          |         |   |         |          |         |   |         |         |         |   |          |          |         |   |          |          |         |
| C                                              | 6.28500                                                                                                                                                                                                                                                                                                                                                                                                                                                                                                                                                                                                                                                                                                                                                                                                                                                                                                                                                                                                                                                                                                                                                                                                                                                                                                                                                                                                                                                                                                                                                                                                                                                                                                                                                                                                                                                                                                                                                     | -2.37119 | 1.95813  |         |          |   |         |          |         |   |         |          |         |   |         |          |         |   |         |         |          |   |         |         |          |   |         |          |         |   |         |         |         |   |         |          |         |   |          |          |         |   |         |         |          |   |         |         |         |   |          |         |          |   |          |         |          |   |          |         |          |   |          |         |          |   |          |         |         |   |          |         |          |   |          |         |         |   |          |         |         |   |         |         |          |   |         |          |         |   |         |          |         |   |         |         |         |   |          |          |         |   |          |          |         |
| C                                              | 1.62742                                                                                                                                                                                                                                                                                                                                                                                                                                                                                                                                                                                                                                                                                                                                                                                                                                                                                                                                                                                                                                                                                                                                                                                                                                                                                                                                                                                                                                                                                                                                                                                                                                                                                                                                                                                                                                                                                                                                                     | 1.92295  | 0.27637  |         |          |   |         |          |         |   |         |          |         |   |         |          |         |   |         |         |          |   |         |         |          |   |         |          |         |   |         |         |         |   |         |          |         |   |          |          |         |   |         |         |          |   |         |         |         |   |          |         |          |   |          |         |          |   |          |         |          |   |          |         |          |   |          |         |         |   |          |         |          |   |          |         |         |   |          |         |         |   |         |         |          |   |         |          |         |   |         |          |         |   |         |         |         |   |          |          |         |   |          |          |         |
| C                                              | 0.30938                                                                                                                                                                                                                                                                                                                                                                                                                                                                                                                                                                                                                                                                                                                                                                                                                                                                                                                                                                                                                                                                                                                                                                                                                                                                                                                                                                                                                                                                                                                                                                                                                                                                                                                                                                                                                                                                                                                                                     | -0.11706 | 0.81115  |         |          |   |         |          |         |   |         |          |         |   |         |          |         |   |         |         |          |   |         |         |          |   |         |          |         |   |         |         |         |   |         |          |         |   |          |          |         |   |         |         |          |   |         |         |         |   |          |         |          |   |          |         |          |   |          |         |          |   |          |         |          |   |          |         |         |   |          |         |          |   |          |         |         |   |          |         |         |   |         |         |          |   |         |          |         |   |         |          |         |   |         |         |         |   |          |          |         |   |          |          |         |
| O                                              | -0.67873                                                                                                                                                                                                                                                                                                                                                                                                                                                                                                                                                                                                                                                                                                                                                                                                                                                                                                                                                                                                                                                                                                                                                                                                                                                                                                                                                                                                                                                                                                                                                                                                                                                                                                                                                                                                                                                                                                                                                    | -0.87300 | 0.84626  |         |          |   |         |          |         |   |         |          |         |   |         |          |         |   |         |         |          |   |         |         |          |   |         |          |         |   |         |         |         |   |         |          |         |   |          |          |         |   |         |         |          |   |         |         |         |   |          |         |          |   |          |         |          |   |          |         |          |   |          |         |          |   |          |         |         |   |          |         |          |   |          |         |         |   |          |         |         |   |         |         |          |   |         |          |         |   |         |          |         |   |         |         |         |   |          |          |         |   |          |          |         |
| C                                              | 2.89080                                                                                                                                                                                                                                                                                                                                                                                                                                                                                                                                                                                                                                                                                                                                                                                                                                                                                                                                                                                                                                                                                                                                                                                                                                                                                                                                                                                                                                                                                                                                                                                                                                                                                                                                                                                                                                                                                                                                                     | 2.61991  | -1.99566 |         |          |   |         |          |         |   |         |          |         |   |         |          |         |   |         |         |          |   |         |         |          |   |         |          |         |   |         |         |         |   |         |          |         |   |          |          |         |   |         |         |          |   |         |         |         |   |          |         |          |   |          |         |          |   |          |         |          |   |          |         |          |   |          |         |         |   |          |         |          |   |          |         |         |   |          |         |         |   |         |         |          |   |         |          |         |   |         |          |         |   |         |         |         |   |          |          |         |   |          |          |         |
| C                                              | 0.43883                                                                                                                                                                                                                                                                                                                                                                                                                                                                                                                                                                                                                                                                                                                                                                                                                                                                                                                                                                                                                                                                                                                                                                                                                                                                                                                                                                                                                                                                                                                                                                                                                                                                                                                                                                                                                                                                                                                                                     | 1.11101  | 0.12470  |         |          |   |         |          |         |   |         |          |         |   |         |          |         |   |         |         |          |   |         |         |          |   |         |          |         |   |         |         |         |   |         |          |         |   |          |          |         |   |         |         |          |   |         |         |         |   |          |         |          |   |          |         |          |   |          |         |          |   |          |         |          |   |          |         |         |   |          |         |          |   |          |         |         |   |          |         |         |   |         |         |          |   |         |          |         |   |         |          |         |   |         |         |         |   |          |          |         |   |          |          |         |
| C                                              | -0.66595                                                                                                                                                                                                                                                                                                                                                                                                                                                                                                                                                                                                                                                                                                                                                                                                                                                                                                                                                                                                                                                                                                                                                                                                                                                                                                                                                                                                                                                                                                                                                                                                                                                                                                                                                                                                                                                                                                                                                    | 1.52863  | -0.82317 |         |          |   |         |          |         |   |         |          |         |   |         |          |         |   |         |         |          |   |         |         |          |   |         |          |         |   |         |         |         |   |         |          |         |   |          |          |         |   |         |         |          |   |         |         |         |   |          |         |          |   |          |         |          |   |          |         |          |   |          |         |          |   |          |         |         |   |          |         |          |   |          |         |         |   |          |         |         |   |         |         |          |   |         |          |         |   |         |          |         |   |         |         |         |   |          |          |         |   |          |          |         |
| C                                              | -1.98903                                                                                                                                                                                                                                                                                                                                                                                                                                                                                                                                                                                                                                                                                                                                                                                                                                                                                                                                                                                                                                                                                                                                                                                                                                                                                                                                                                                                                                                                                                                                                                                                                                                                                                                                                                                                                                                                                                                                                    | 1.98885  | -0.20601 |         |          |   |         |          |         |   |         |          |         |   |         |          |         |   |         |         |          |   |         |         |          |   |         |          |         |   |         |         |         |   |         |          |         |   |          |          |         |   |         |         |          |   |         |         |         |   |          |         |          |   |          |         |          |   |          |         |          |   |          |         |          |   |          |         |         |   |          |         |          |   |          |         |         |   |          |         |         |   |         |         |          |   |         |          |         |   |         |          |         |   |         |         |         |   |          |          |         |   |          |          |         |
| O                                              | -0.99619                                                                                                                                                                                                                                                                                                                                                                                                                                                                                                                                                                                                                                                                                                                                                                                                                                                                                                                                                                                                                                                                                                                                                                                                                                                                                                                                                                                                                                                                                                                                                                                                                                                                                                                                                                                                                                                                                                                                                    | 0.52444  | -1.81489 |         |          |   |         |          |         |   |         |          |         |   |         |          |         |   |         |         |          |   |         |         |          |   |         |          |         |   |         |         |         |   |         |          |         |   |          |          |         |   |         |         |          |   |         |         |         |   |          |         |          |   |          |         |          |   |          |         |          |   |          |         |          |   |          |         |         |   |          |         |          |   |          |         |         |   |          |         |         |   |         |         |          |   |         |          |         |   |         |          |         |   |         |         |         |   |          |          |         |   |          |          |         |
| C                                              | -3.10652                                                                                                                                                                                                                                                                                                                                                                                                                                                                                                                                                                                                                                                                                                                                                                                                                                                                                                                                                                                                                                                                                                                                                                                                                                                                                                                                                                                                                                                                                                                                                                                                                                                                                                                                                                                                                                                                                                                                                    | 2.18798  | -1.03257 |         |          |   |         |          |         |   |         |          |         |   |         |          |         |   |         |         |          |   |         |         |          |   |         |          |         |   |         |         |         |   |         |          |         |   |          |          |         |   |         |         |          |   |         |         |         |   |          |         |          |   |          |         |          |   |          |         |          |   |          |         |          |   |          |         |         |   |          |         |          |   |          |         |         |   |          |         |         |   |         |         |          |   |         |          |         |   |         |          |         |   |         |         |         |   |          |          |         |   |          |          |         |
| C                                              | -2.10359                                                                                                                                                                                                                                                                                                                                                                                                                                                                                                                                                                                                                                                                                                                                                                                                                                                                                                                                                                                                                                                                                                                                                                                                                                                                                                                                                                                                                                                                                                                                                                                                                                                                                                                                                                                                                                                                                                                                                    | 2.30830  | 1.15053  |         |          |   |         |          |         |   |         |          |         |   |         |          |         |   |         |         |          |   |         |         |          |   |         |          |         |   |         |         |         |   |         |          |         |   |          |          |         |   |         |         |          |   |         |         |         |   |          |         |          |   |          |         |          |   |          |         |          |   |          |         |          |   |          |         |         |   |          |         |          |   |          |         |         |   |          |         |         |   |         |         |          |   |         |          |         |   |         |          |         |   |         |         |         |   |          |          |         |   |          |          |         |
| C                                              | -4.30569                                                                                                                                                                                                                                                                                                                                                                                                                                                                                                                                                                                                                                                                                                                                                                                                                                                                                                                                                                                                                                                                                                                                                                                                                                                                                                                                                                                                                                                                                                                                                                                                                                                                                                                                                                                                                                                                                                                                                    | 2.67829  | -0.51329 |         |          |   |         |          |         |   |         |          |         |   |         |          |         |   |         |         |          |   |         |         |          |   |         |          |         |   |         |         |         |   |         |          |         |   |          |          |         |   |         |         |          |   |         |         |         |   |          |         |          |   |          |         |          |   |          |         |          |   |          |         |          |   |          |         |         |   |          |         |          |   |          |         |         |   |          |         |         |   |         |         |          |   |         |          |         |   |         |          |         |   |         |         |         |   |          |          |         |   |          |          |         |
| C                                              | -3.30152                                                                                                                                                                                                                                                                                                                                                                                                                                                                                                                                                                                                                                                                                                                                                                                                                                                                                                                                                                                                                                                                                                                                                                                                                                                                                                                                                                                                                                                                                                                                                                                                                                                                                                                                                                                                                                                                                                                                                    | 2.80245  | 1.67456  |         |          |   |         |          |         |   |         |          |         |   |         |          |         |   |         |         |          |   |         |         |          |   |         |          |         |   |         |         |         |   |         |          |         |   |          |          |         |   |         |         |          |   |         |         |         |   |          |         |          |   |          |         |          |   |          |         |          |   |          |         |          |   |          |         |         |   |          |         |          |   |          |         |         |   |          |         |         |   |         |         |          |   |         |          |         |   |         |          |         |   |         |         |         |   |          |          |         |   |          |          |         |
| C                                              | -4.40949                                                                                                                                                                                                                                                                                                                                                                                                                                                                                                                                                                                                                                                                                                                                                                                                                                                                                                                                                                                                                                                                                                                                                                                                                                                                                                                                                                                                                                                                                                                                                                                                                                                                                                                                                                                                                                                                                                                                                    | 2.98620  | 0.84604  |         |          |   |         |          |         |   |         |          |         |   |         |          |         |   |         |         |          |   |         |         |          |   |         |          |         |   |         |         |         |   |         |          |         |   |          |          |         |   |         |         |          |   |         |         |         |   |          |         |          |   |          |         |          |   |          |         |          |   |          |         |          |   |          |         |         |   |          |         |          |   |          |         |         |   |          |         |         |   |         |         |          |   |         |          |         |   |         |          |         |   |         |         |         |   |          |          |         |   |          |          |         |
| H                                              | 1.99396                                                                                                                                                                                                                                                                                                                                                                                                                                                                                                                                                                                                                                                                                                                                                                                                                                                                                                                                                                                                                                                                                                                                                                                                                                                                                                                                                                                                                                                                                                                                                                                                                                                                                                                                                                                                                                                                                                                                                     | 0.33690  | -1.94558 |         |          |   |         |          |         |   |         |          |         |   |         |          |         |   |         |         |          |   |         |         |          |   |         |          |         |   |         |         |         |   |         |          |         |   |          |          |         |   |         |         |          |   |         |         |         |   |          |         |          |   |          |         |          |   |          |         |          |   |          |         |          |   |          |         |         |   |          |         |          |   |          |         |         |   |          |         |         |   |         |         |          |   |         |          |         |   |         |          |         |   |         |         |         |   |          |          |         |   |          |          |         |
| O                                              | 1.44795                                                                                                                                                                                                                                                                                                                                                                                                                                                                                                                                                                                                                                                                                                                                                                                                                                                                                                                                                                                                                                                                                                                                                                                                                                                                                                                                                                                                                                                                                                                                                                                                                                                                                                                                                                                                                                                                                                                                                     | -0.50742 | 1.54787  |         |          |   |         |          |         |   |         |          |         |   |         |          |         |   |         |         |          |   |         |         |          |   |         |          |         |   |         |         |         |   |         |          |         |   |          |          |         |   |         |         |          |   |         |         |         |   |          |         |          |   |          |         |          |   |          |         |          |   |          |         |          |   |          |         |         |   |          |         |          |   |          |         |         |   |          |         |         |   |         |         |          |   |         |          |         |   |         |          |         |   |         |         |         |   |          |          |         |   |          |          |         |
| C                                              | 1.22805                                                                                                                                                                                                                                                                                                                                                                                                                                                                                                                                                                                                                                                                                                                                                                                                                                                                                                                                                                                                                                                                                                                                                                                                                                                                                                                                                                                                                                                                                                                                                                                                                                                                                                                                                                                                                                                                                                                                                     | -1.58962 | 2.45273  |         |          |   |         |          |         |   |         |          |         |   |         |          |         |   |         |         |          |   |         |         |          |   |         |          |         |   |         |         |         |   |         |          |         |   |          |          |         |   |         |         |          |   |         |         |         |   |          |         |          |   |          |         |          |   |          |         |          |   |          |         |          |   |          |         |         |   |          |         |          |   |          |         |         |   |          |         |         |   |         |         |          |   |         |          |         |   |         |          |         |   |         |         |         |   |          |          |         |   |          |          |         |
| C                                              | 1.49810                                                                                                                                                                                                                                                                                                                                                                                                                                                                                                                                                                                                                                                                                                                                                                                                                                                                                                                                                                                                                                                                                                                                                                                                                                                                                                                                                                                                                                                                                                                                                                                                                                                                                                                                                                                                                                                                                                                                                     | 3.43499  | 0.38657  |         |          |   |         |          |         |   |         |          |         |   |         |          |         |   |         |         |          |   |         |         |          |   |         |          |         |   |         |         |         |   |         |          |         |   |          |          |         |   |         |         |          |   |         |         |         |   |          |         |          |   |          |         |          |   |          |         |          |   |          |         |          |   |          |         |         |   |          |         |          |   |          |         |         |   |          |         |         |   |         |         |          |   |         |          |         |   |         |          |         |   |         |         |         |   |          |          |         |   |          |          |         |
| C                                              | -4.60499                                                                                                                                                                                                                                                                                                                                                                                                                                                                                                                                                                                                                                                                                                                                                                                                                                                                                                                                                                                                                                                                                                                                                                                                                                                                                                                                                                                                                                                                                                                                                                                                                                                                                                                                                                                                                                                                                                                                                    | -1.25140 | 0.61830  |         |          |   |         |          |         |   |         |          |         |   |         |          |         |   |         |         |          |   |         |         |          |   |         |          |         |   |         |         |         |   |         |          |         |   |          |          |         |   |         |         |          |   |         |         |         |   |          |         |          |   |          |         |          |   |          |         |          |   |          |         |          |   |          |         |         |   |          |         |          |   |          |         |         |   |          |         |         |   |         |         |          |   |         |          |         |   |         |          |         |   |         |         |         |   |          |          |         |   |          |          |         |
| O                                              | -5.76264                                                                                                                                                                                                                                                                                                                                                                                                                                                                                                                                                                                                                                                                                                                                                                                                                                                                                                                                                                                                                                                                                                                                                                                                                                                                                                                                                                                                                                                                                                                                                                                                                                                                                                                                                                                                                                                                                                                                                    | -1.23593 | 1.05029  |         |          |   |         |          |         |   |         |          |         |   |         |          |         |   |         |         |          |   |         |         |          |   |         |          |         |   |         |         |         |   |         |          |         |   |          |          |         |   |         |         |          |   |         |         |         |   |          |         |          |   |          |         |          |   |          |         |          |   |          |         |          |   |          |         |         |   |          |         |          |   |          |         |         |   |          |         |         |   |         |         |          |   |         |          |         |   |         |          |         |   |         |         |         |   |          |          |         |   |          |          |         |

|   |          |          |          |
|---|----------|----------|----------|
| C | -4.35961 | -1.31611 | -0.89813 |
| N | -3.01282 | -1.62910 | -1.32624 |
| C | -2.60479 | -2.91967 | -1.46741 |
| O | -3.36042 | -3.88453 | -1.32509 |
| C | -1.13281 | -3.08108 | -1.81080 |
| N | -3.51300 | -1.19235 | 1.40645  |
| C | -3.63854 | -1.03667 | 2.84319  |
| H | -3.36871 | 3.03986  | 2.73373  |
| H | -5.34306 | 3.36598  | 1.25270  |
| H | -5.16013 | 2.82159  | -1.17045 |
| H | -3.03013 | 1.95101  | -2.08964 |
| H | -1.24311 | 2.15954  | 1.79611  |
| H | 0.93589  | 3.66289  | 1.29836  |
| H | 0.95685  | 3.88619  | -0.44981 |
| H | 2.47602  | 3.92108  | 0.46804  |
| H | 3.34177  | 3.54790  | -1.62288 |
| H | -0.29051 | 2.40382  | -1.37975 |
| H | 1.93411  | 2.85990  | -2.47479 |
| H | 3.55101  | 2.19064  | -2.75809 |
| H | 2.24952  | 1.54563  | 1.08427  |
| H | 4.04866  | 0.98618  | -0.43206 |
| H | 3.65525  | -0.97573 | 1.10391  |
| H | 6.83365  | -3.11906 | 1.37465  |
| H | 6.92357  | -2.05565 | 2.79089  |
| H | 5.39629  | -2.85076 | 2.37421  |
| H | 6.61425  | 1.31283  | -0.84448 |
| H | -0.92075 | -4.13510 | -1.99822 |
| H | -0.52724 | -2.71912 | -0.97315 |
| H | -0.86424 | -2.49020 | -2.69312 |
| H | -2.31900 | -0.87886 | -1.39726 |
| H | -5.04329 | -2.07046 | -1.29367 |
| H | -4.65057 | -0.34492 | -1.31158 |
| H | -2.58352 | -1.08753 | 1.00048  |
| H | -2.65106 | -1.16739 | 3.29149  |
| H | -4.02276 | -0.04421 | 3.11226  |
| H | 2.18824  | -1.76928 | 2.94440  |
| H | 0.47641  | -1.33342 | 3.20729  |
| H | 0.89981  | -2.49324 | 1.93177  |
| H | -4.32357 | -1.78658 | 3.25027  |
| O | 1.61833  | -0.25514 | -2.64106 |
| H | -0.14150 | 0.16129  | -2.13986 |
| C | 2.17348  | -1.55035 | -2.45584 |
| H | 3.26534  | -1.54714 | -2.59241 |
| H | 1.73737  | -2.21102 | -3.20992 |
| H | 1.94773  | -1.96257 | -1.46249 |
| H | 7.80144  | -0.52196 | 0.45811  |

Optimized Molecular Properties for **T6-product**

|                                                |                                                                                                                                                                                                                                                                                                                                                                                                                                                                                                                                                                                                                                                                                                                                                                                                                                                                                                                                                                                                                                                                                                                                                                                                                                                                                                                                                                                                                                                                                                                                                                                                                                                                                                                                                                                                                                                                                                                                                                                 |          |          |          |         |   |         |         |          |   |         |         |          |   |         |         |          |   |         |         |         |   |         |         |         |   |         |         |          |   |         |          |          |   |          |          |          |   |          |         |          |   |         |          |         |   |          |          |          |   |          |          |         |   |          |          |          |   |          |          |         |   |          |          |         |   |          |          |          |   |          |          |         |   |          |          |          |   |          |          |          |   |         |          |         |   |         |          |          |   |         |         |          |   |         |          |          |   |          |         |         |   |          |         |         |
|------------------------------------------------|---------------------------------------------------------------------------------------------------------------------------------------------------------------------------------------------------------------------------------------------------------------------------------------------------------------------------------------------------------------------------------------------------------------------------------------------------------------------------------------------------------------------------------------------------------------------------------------------------------------------------------------------------------------------------------------------------------------------------------------------------------------------------------------------------------------------------------------------------------------------------------------------------------------------------------------------------------------------------------------------------------------------------------------------------------------------------------------------------------------------------------------------------------------------------------------------------------------------------------------------------------------------------------------------------------------------------------------------------------------------------------------------------------------------------------------------------------------------------------------------------------------------------------------------------------------------------------------------------------------------------------------------------------------------------------------------------------------------------------------------------------------------------------------------------------------------------------------------------------------------------------------------------------------------------------------------------------------------------------|----------|----------|----------|---------|---|---------|---------|----------|---|---------|---------|----------|---|---------|---------|----------|---|---------|---------|---------|---|---------|---------|---------|---|---------|---------|----------|---|---------|----------|----------|---|----------|----------|----------|---|----------|---------|----------|---|---------|----------|---------|---|----------|----------|----------|---|----------|----------|---------|---|----------|----------|----------|---|----------|----------|---------|---|----------|----------|---------|---|----------|----------|----------|---|----------|----------|---------|---|----------|----------|----------|---|----------|----------|----------|---|---------|----------|---------|---|---------|----------|----------|---|---------|---------|----------|---|---------|----------|----------|---|----------|---------|---------|---|----------|---------|---------|
| Number of<br>(-)<br>Vibrational<br>Frequencies | 0                                                                                                                                                                                                                                                                                                                                                                                                                                                                                                                                                                                                                                                                                                                                                                                                                                                                                                                                                                                                                                                                                                                                                                                                                                                                                                                                                                                                                                                                                                                                                                                                                                                                                                                                                                                                                                                                                                                                                                               |          |          |          |         |   |         |         |          |   |         |         |          |   |         |         |          |   |         |         |         |   |         |         |         |   |         |         |          |   |         |          |          |   |          |          |          |   |          |         |          |   |         |          |         |   |          |          |          |   |          |          |         |   |          |          |          |   |          |          |         |   |          |          |         |   |          |          |          |   |          |          |         |   |          |          |          |   |          |          |          |   |         |          |         |   |         |          |          |   |         |         |          |   |         |          |          |   |          |         |         |   |          |         |         |
| Absolute<br>Energies<br>(Hartrees)             | <p><b>B3LYP/6-31G(d) (PCM)</b></p> <p>There are 25 positive frequencies below 100 cm<sup>-1</sup>.</p> <p>Zero-point correction: 0.607249 hartree<br/>         Enthalpy correction: 0.651604 hartree<br/>         Free Energy correction: 0.522844 hartree<br/>         Quasiharmonic Free Energy correction: 0.540913 hartree</p> <p>SCF Energy: -1644.947845 hartree<br/>         SCF Energy + ZPVE: -1644.340596 hartree<br/>         Enthalpy: -1644.296241 hartree<br/>         Free Energy: -1644.425001 hartree</p> <p>Free Energy with quasiharmonic correction: -1644.406932 hartree<br/>         (correction: 11.34 kcal/mol)</p> <p><b>B3LYP-D3/6-311+G(d,p) (PCM)</b></p> <p>SCF Done: E(RB3LYP) = -1645.54204861 A.U.</p>                                                                                                                                                                                                                                                                                                                                                                                                                                                                                                                                                                                                                                                                                                                                                                                                                                                                                                                                                                                                                                                                                                                                                                                                                                          |          |          |          |         |   |         |         |          |   |         |         |          |   |         |         |          |   |         |         |         |   |         |         |         |   |         |         |          |   |         |          |          |   |          |          |          |   |          |         |          |   |         |          |         |   |          |          |          |   |          |          |         |   |          |          |          |   |          |          |         |   |          |          |         |   |          |          |          |   |          |          |         |   |          |          |          |   |          |          |          |   |         |          |         |   |         |          |          |   |         |         |          |   |         |          |          |   |          |         |         |   |          |         |         |
| Cartesian<br>Coordinates                       | <p>(PCM)</p> <p>72</p> <p>spD3-product-T6.out Energy: -1032593.2171404</p> <table> <tr><td>O</td><td>3.57900</td><td>-2.30052</td><td>1.22430</td></tr> <tr><td>C</td><td>4.67366</td><td>1.75262</td><td>-1.43845</td></tr> <tr><td>C</td><td>3.95928</td><td>0.62690</td><td>-1.10600</td></tr> <tr><td>N</td><td>5.68370</td><td>1.81276</td><td>-0.49413</td></tr> <tr><td>C</td><td>5.54411</td><td>0.75517</td><td>0.34765</td></tr> <tr><td>N</td><td>4.50710</td><td>0.01393</td><td>0.00549</td></tr> <tr><td>C</td><td>4.51329</td><td>2.76012</td><td>-2.52877</td></tr> <tr><td>C</td><td>0.86984</td><td>-2.46525</td><td>-1.44864</td></tr> <tr><td>C</td><td>-0.31640</td><td>-0.33042</td><td>-1.71777</td></tr> <tr><td>O</td><td>-1.20084</td><td>0.46383</td><td>-1.44409</td></tr> <tr><td>C</td><td>4.66062</td><td>-2.88912</td><td>1.93754</td></tr> <tr><td>C</td><td>-0.10107</td><td>-1.63114</td><td>-1.02331</td></tr> <tr><td>C</td><td>-1.00225</td><td>-1.90609</td><td>0.17614</td></tr> <tr><td>C</td><td>-2.48760</td><td>-1.99367</td><td>-0.16511</td></tr> <tr><td>O</td><td>-0.78668</td><td>-0.94178</td><td>1.20743</td></tr> <tr><td>C</td><td>-3.45394</td><td>-1.56324</td><td>0.75086</td></tr> <tr><td>C</td><td>-2.91155</td><td>-2.59159</td><td>-1.35945</td></tr> <tr><td>C</td><td>-4.81458</td><td>-1.70763</td><td>0.47017</td></tr> <tr><td>C</td><td>-4.27049</td><td>-2.74036</td><td>-1.63993</td></tr> <tr><td>C</td><td>-5.22922</td><td>-2.29520</td><td>-0.72695</td></tr> <tr><td>H</td><td>2.14553</td><td>-1.99172</td><td>2.11718</td></tr> <tr><td>O</td><td>0.56991</td><td>-0.08957</td><td>-2.71342</td></tr> <tr><td>C</td><td>0.36328</td><td>1.12848</td><td>-3.45086</td></tr> <tr><td>C</td><td>1.27656</td><td>-3.79402</td><td>-0.89130</td></tr> <tr><td>C</td><td>-3.77202</td><td>2.43359</td><td>0.98030</td></tr> <tr><td>O</td><td>-4.89001</td><td>2.82937</td><td>1.32161</td></tr> </table> | O        | 3.57900  | -2.30052 | 1.22430 | C | 4.67366 | 1.75262 | -1.43845 | C | 3.95928 | 0.62690 | -1.10600 | N | 5.68370 | 1.81276 | -0.49413 | C | 5.54411 | 0.75517 | 0.34765 | N | 4.50710 | 0.01393 | 0.00549 | C | 4.51329 | 2.76012 | -2.52877 | C | 0.86984 | -2.46525 | -1.44864 | C | -0.31640 | -0.33042 | -1.71777 | O | -1.20084 | 0.46383 | -1.44409 | C | 4.66062 | -2.88912 | 1.93754 | C | -0.10107 | -1.63114 | -1.02331 | C | -1.00225 | -1.90609 | 0.17614 | C | -2.48760 | -1.99367 | -0.16511 | O | -0.78668 | -0.94178 | 1.20743 | C | -3.45394 | -1.56324 | 0.75086 | C | -2.91155 | -2.59159 | -1.35945 | C | -4.81458 | -1.70763 | 0.47017 | C | -4.27049 | -2.74036 | -1.63993 | C | -5.22922 | -2.29520 | -0.72695 | H | 2.14553 | -1.99172 | 2.11718 | O | 0.56991 | -0.08957 | -2.71342 | C | 0.36328 | 1.12848 | -3.45086 | C | 1.27656 | -3.79402 | -0.89130 | C | -3.77202 | 2.43359 | 0.98030 | O | -4.89001 | 2.82937 | 1.32161 |
| O                                              | 3.57900                                                                                                                                                                                                                                                                                                                                                                                                                                                                                                                                                                                                                                                                                                                                                                                                                                                                                                                                                                                                                                                                                                                                                                                                                                                                                                                                                                                                                                                                                                                                                                                                                                                                                                                                                                                                                                                                                                                                                                         | -2.30052 | 1.22430  |          |         |   |         |         |          |   |         |         |          |   |         |         |          |   |         |         |         |   |         |         |         |   |         |         |          |   |         |          |          |   |          |          |          |   |          |         |          |   |         |          |         |   |          |          |          |   |          |          |         |   |          |          |          |   |          |          |         |   |          |          |         |   |          |          |          |   |          |          |         |   |          |          |          |   |          |          |          |   |         |          |         |   |         |          |          |   |         |         |          |   |         |          |          |   |          |         |         |   |          |         |         |
| C                                              | 4.67366                                                                                                                                                                                                                                                                                                                                                                                                                                                                                                                                                                                                                                                                                                                                                                                                                                                                                                                                                                                                                                                                                                                                                                                                                                                                                                                                                                                                                                                                                                                                                                                                                                                                                                                                                                                                                                                                                                                                                                         | 1.75262  | -1.43845 |          |         |   |         |         |          |   |         |         |          |   |         |         |          |   |         |         |         |   |         |         |         |   |         |         |          |   |         |          |          |   |          |          |          |   |          |         |          |   |         |          |         |   |          |          |          |   |          |          |         |   |          |          |          |   |          |          |         |   |          |          |         |   |          |          |          |   |          |          |         |   |          |          |          |   |          |          |          |   |         |          |         |   |         |          |          |   |         |         |          |   |         |          |          |   |          |         |         |   |          |         |         |
| C                                              | 3.95928                                                                                                                                                                                                                                                                                                                                                                                                                                                                                                                                                                                                                                                                                                                                                                                                                                                                                                                                                                                                                                                                                                                                                                                                                                                                                                                                                                                                                                                                                                                                                                                                                                                                                                                                                                                                                                                                                                                                                                         | 0.62690  | -1.10600 |          |         |   |         |         |          |   |         |         |          |   |         |         |          |   |         |         |         |   |         |         |         |   |         |         |          |   |         |          |          |   |          |          |          |   |          |         |          |   |         |          |         |   |          |          |          |   |          |          |         |   |          |          |          |   |          |          |         |   |          |          |         |   |          |          |          |   |          |          |         |   |          |          |          |   |          |          |          |   |         |          |         |   |         |          |          |   |         |         |          |   |         |          |          |   |          |         |         |   |          |         |         |
| N                                              | 5.68370                                                                                                                                                                                                                                                                                                                                                                                                                                                                                                                                                                                                                                                                                                                                                                                                                                                                                                                                                                                                                                                                                                                                                                                                                                                                                                                                                                                                                                                                                                                                                                                                                                                                                                                                                                                                                                                                                                                                                                         | 1.81276  | -0.49413 |          |         |   |         |         |          |   |         |         |          |   |         |         |          |   |         |         |         |   |         |         |         |   |         |         |          |   |         |          |          |   |          |          |          |   |          |         |          |   |         |          |         |   |          |          |          |   |          |          |         |   |          |          |          |   |          |          |         |   |          |          |         |   |          |          |          |   |          |          |         |   |          |          |          |   |          |          |          |   |         |          |         |   |         |          |          |   |         |         |          |   |         |          |          |   |          |         |         |   |          |         |         |
| C                                              | 5.54411                                                                                                                                                                                                                                                                                                                                                                                                                                                                                                                                                                                                                                                                                                                                                                                                                                                                                                                                                                                                                                                                                                                                                                                                                                                                                                                                                                                                                                                                                                                                                                                                                                                                                                                                                                                                                                                                                                                                                                         | 0.75517  | 0.34765  |          |         |   |         |         |          |   |         |         |          |   |         |         |          |   |         |         |         |   |         |         |         |   |         |         |          |   |         |          |          |   |          |          |          |   |          |         |          |   |         |          |         |   |          |          |          |   |          |          |         |   |          |          |          |   |          |          |         |   |          |          |         |   |          |          |          |   |          |          |         |   |          |          |          |   |          |          |          |   |         |          |         |   |         |          |          |   |         |         |          |   |         |          |          |   |          |         |         |   |          |         |         |
| N                                              | 4.50710                                                                                                                                                                                                                                                                                                                                                                                                                                                                                                                                                                                                                                                                                                                                                                                                                                                                                                                                                                                                                                                                                                                                                                                                                                                                                                                                                                                                                                                                                                                                                                                                                                                                                                                                                                                                                                                                                                                                                                         | 0.01393  | 0.00549  |          |         |   |         |         |          |   |         |         |          |   |         |         |          |   |         |         |         |   |         |         |         |   |         |         |          |   |         |          |          |   |          |          |          |   |          |         |          |   |         |          |         |   |          |          |          |   |          |          |         |   |          |          |          |   |          |          |         |   |          |          |         |   |          |          |          |   |          |          |         |   |          |          |          |   |          |          |          |   |         |          |         |   |         |          |          |   |         |         |          |   |         |          |          |   |          |         |         |   |          |         |         |
| C                                              | 4.51329                                                                                                                                                                                                                                                                                                                                                                                                                                                                                                                                                                                                                                                                                                                                                                                                                                                                                                                                                                                                                                                                                                                                                                                                                                                                                                                                                                                                                                                                                                                                                                                                                                                                                                                                                                                                                                                                                                                                                                         | 2.76012  | -2.52877 |          |         |   |         |         |          |   |         |         |          |   |         |         |          |   |         |         |         |   |         |         |         |   |         |         |          |   |         |          |          |   |          |          |          |   |          |         |          |   |         |          |         |   |          |          |          |   |          |          |         |   |          |          |          |   |          |          |         |   |          |          |         |   |          |          |          |   |          |          |         |   |          |          |          |   |          |          |          |   |         |          |         |   |         |          |          |   |         |         |          |   |         |          |          |   |          |         |         |   |          |         |         |
| C                                              | 0.86984                                                                                                                                                                                                                                                                                                                                                                                                                                                                                                                                                                                                                                                                                                                                                                                                                                                                                                                                                                                                                                                                                                                                                                                                                                                                                                                                                                                                                                                                                                                                                                                                                                                                                                                                                                                                                                                                                                                                                                         | -2.46525 | -1.44864 |          |         |   |         |         |          |   |         |         |          |   |         |         |          |   |         |         |         |   |         |         |         |   |         |         |          |   |         |          |          |   |          |          |          |   |          |         |          |   |         |          |         |   |          |          |          |   |          |          |         |   |          |          |          |   |          |          |         |   |          |          |         |   |          |          |          |   |          |          |         |   |          |          |          |   |          |          |          |   |         |          |         |   |         |          |          |   |         |         |          |   |         |          |          |   |          |         |         |   |          |         |         |
| C                                              | -0.31640                                                                                                                                                                                                                                                                                                                                                                                                                                                                                                                                                                                                                                                                                                                                                                                                                                                                                                                                                                                                                                                                                                                                                                                                                                                                                                                                                                                                                                                                                                                                                                                                                                                                                                                                                                                                                                                                                                                                                                        | -0.33042 | -1.71777 |          |         |   |         |         |          |   |         |         |          |   |         |         |          |   |         |         |         |   |         |         |         |   |         |         |          |   |         |          |          |   |          |          |          |   |          |         |          |   |         |          |         |   |          |          |          |   |          |          |         |   |          |          |          |   |          |          |         |   |          |          |         |   |          |          |          |   |          |          |         |   |          |          |          |   |          |          |          |   |         |          |         |   |         |          |          |   |         |         |          |   |         |          |          |   |          |         |         |   |          |         |         |
| O                                              | -1.20084                                                                                                                                                                                                                                                                                                                                                                                                                                                                                                                                                                                                                                                                                                                                                                                                                                                                                                                                                                                                                                                                                                                                                                                                                                                                                                                                                                                                                                                                                                                                                                                                                                                                                                                                                                                                                                                                                                                                                                        | 0.46383  | -1.44409 |          |         |   |         |         |          |   |         |         |          |   |         |         |          |   |         |         |         |   |         |         |         |   |         |         |          |   |         |          |          |   |          |          |          |   |          |         |          |   |         |          |         |   |          |          |          |   |          |          |         |   |          |          |          |   |          |          |         |   |          |          |         |   |          |          |          |   |          |          |         |   |          |          |          |   |          |          |          |   |         |          |         |   |         |          |          |   |         |         |          |   |         |          |          |   |          |         |         |   |          |         |         |
| C                                              | 4.66062                                                                                                                                                                                                                                                                                                                                                                                                                                                                                                                                                                                                                                                                                                                                                                                                                                                                                                                                                                                                                                                                                                                                                                                                                                                                                                                                                                                                                                                                                                                                                                                                                                                                                                                                                                                                                                                                                                                                                                         | -2.88912 | 1.93754  |          |         |   |         |         |          |   |         |         |          |   |         |         |          |   |         |         |         |   |         |         |         |   |         |         |          |   |         |          |          |   |          |          |          |   |          |         |          |   |         |          |         |   |          |          |          |   |          |          |         |   |          |          |          |   |          |          |         |   |          |          |         |   |          |          |          |   |          |          |         |   |          |          |          |   |          |          |          |   |         |          |         |   |         |          |          |   |         |         |          |   |         |          |          |   |          |         |         |   |          |         |         |
| C                                              | -0.10107                                                                                                                                                                                                                                                                                                                                                                                                                                                                                                                                                                                                                                                                                                                                                                                                                                                                                                                                                                                                                                                                                                                                                                                                                                                                                                                                                                                                                                                                                                                                                                                                                                                                                                                                                                                                                                                                                                                                                                        | -1.63114 | -1.02331 |          |         |   |         |         |          |   |         |         |          |   |         |         |          |   |         |         |         |   |         |         |         |   |         |         |          |   |         |          |          |   |          |          |          |   |          |         |          |   |         |          |         |   |          |          |          |   |          |          |         |   |          |          |          |   |          |          |         |   |          |          |         |   |          |          |          |   |          |          |         |   |          |          |          |   |          |          |          |   |         |          |         |   |         |          |          |   |         |         |          |   |         |          |          |   |          |         |         |   |          |         |         |
| C                                              | -1.00225                                                                                                                                                                                                                                                                                                                                                                                                                                                                                                                                                                                                                                                                                                                                                                                                                                                                                                                                                                                                                                                                                                                                                                                                                                                                                                                                                                                                                                                                                                                                                                                                                                                                                                                                                                                                                                                                                                                                                                        | -1.90609 | 0.17614  |          |         |   |         |         |          |   |         |         |          |   |         |         |          |   |         |         |         |   |         |         |         |   |         |         |          |   |         |          |          |   |          |          |          |   |          |         |          |   |         |          |         |   |          |          |          |   |          |          |         |   |          |          |          |   |          |          |         |   |          |          |         |   |          |          |          |   |          |          |         |   |          |          |          |   |          |          |          |   |         |          |         |   |         |          |          |   |         |         |          |   |         |          |          |   |          |         |         |   |          |         |         |
| C                                              | -2.48760                                                                                                                                                                                                                                                                                                                                                                                                                                                                                                                                                                                                                                                                                                                                                                                                                                                                                                                                                                                                                                                                                                                                                                                                                                                                                                                                                                                                                                                                                                                                                                                                                                                                                                                                                                                                                                                                                                                                                                        | -1.99367 | -0.16511 |          |         |   |         |         |          |   |         |         |          |   |         |         |          |   |         |         |         |   |         |         |         |   |         |         |          |   |         |          |          |   |          |          |          |   |          |         |          |   |         |          |         |   |          |          |          |   |          |          |         |   |          |          |          |   |          |          |         |   |          |          |         |   |          |          |          |   |          |          |         |   |          |          |          |   |          |          |          |   |         |          |         |   |         |          |          |   |         |         |          |   |         |          |          |   |          |         |         |   |          |         |         |
| O                                              | -0.78668                                                                                                                                                                                                                                                                                                                                                                                                                                                                                                                                                                                                                                                                                                                                                                                                                                                                                                                                                                                                                                                                                                                                                                                                                                                                                                                                                                                                                                                                                                                                                                                                                                                                                                                                                                                                                                                                                                                                                                        | -0.94178 | 1.20743  |          |         |   |         |         |          |   |         |         |          |   |         |         |          |   |         |         |         |   |         |         |         |   |         |         |          |   |         |          |          |   |          |          |          |   |          |         |          |   |         |          |         |   |          |          |          |   |          |          |         |   |          |          |          |   |          |          |         |   |          |          |         |   |          |          |          |   |          |          |         |   |          |          |          |   |          |          |          |   |         |          |         |   |         |          |          |   |         |         |          |   |         |          |          |   |          |         |         |   |          |         |         |
| C                                              | -3.45394                                                                                                                                                                                                                                                                                                                                                                                                                                                                                                                                                                                                                                                                                                                                                                                                                                                                                                                                                                                                                                                                                                                                                                                                                                                                                                                                                                                                                                                                                                                                                                                                                                                                                                                                                                                                                                                                                                                                                                        | -1.56324 | 0.75086  |          |         |   |         |         |          |   |         |         |          |   |         |         |          |   |         |         |         |   |         |         |         |   |         |         |          |   |         |          |          |   |          |          |          |   |          |         |          |   |         |          |         |   |          |          |          |   |          |          |         |   |          |          |          |   |          |          |         |   |          |          |         |   |          |          |          |   |          |          |         |   |          |          |          |   |          |          |          |   |         |          |         |   |         |          |          |   |         |         |          |   |         |          |          |   |          |         |         |   |          |         |         |
| C                                              | -2.91155                                                                                                                                                                                                                                                                                                                                                                                                                                                                                                                                                                                                                                                                                                                                                                                                                                                                                                                                                                                                                                                                                                                                                                                                                                                                                                                                                                                                                                                                                                                                                                                                                                                                                                                                                                                                                                                                                                                                                                        | -2.59159 | -1.35945 |          |         |   |         |         |          |   |         |         |          |   |         |         |          |   |         |         |         |   |         |         |         |   |         |         |          |   |         |          |          |   |          |          |          |   |          |         |          |   |         |          |         |   |          |          |          |   |          |          |         |   |          |          |          |   |          |          |         |   |          |          |         |   |          |          |          |   |          |          |         |   |          |          |          |   |          |          |          |   |         |          |         |   |         |          |          |   |         |         |          |   |         |          |          |   |          |         |         |   |          |         |         |
| C                                              | -4.81458                                                                                                                                                                                                                                                                                                                                                                                                                                                                                                                                                                                                                                                                                                                                                                                                                                                                                                                                                                                                                                                                                                                                                                                                                                                                                                                                                                                                                                                                                                                                                                                                                                                                                                                                                                                                                                                                                                                                                                        | -1.70763 | 0.47017  |          |         |   |         |         |          |   |         |         |          |   |         |         |          |   |         |         |         |   |         |         |         |   |         |         |          |   |         |          |          |   |          |          |          |   |          |         |          |   |         |          |         |   |          |          |          |   |          |          |         |   |          |          |          |   |          |          |         |   |          |          |         |   |          |          |          |   |          |          |         |   |          |          |          |   |          |          |          |   |         |          |         |   |         |          |          |   |         |         |          |   |         |          |          |   |          |         |         |   |          |         |         |
| C                                              | -4.27049                                                                                                                                                                                                                                                                                                                                                                                                                                                                                                                                                                                                                                                                                                                                                                                                                                                                                                                                                                                                                                                                                                                                                                                                                                                                                                                                                                                                                                                                                                                                                                                                                                                                                                                                                                                                                                                                                                                                                                        | -2.74036 | -1.63993 |          |         |   |         |         |          |   |         |         |          |   |         |         |          |   |         |         |         |   |         |         |         |   |         |         |          |   |         |          |          |   |          |          |          |   |          |         |          |   |         |          |         |   |          |          |          |   |          |          |         |   |          |          |          |   |          |          |         |   |          |          |         |   |          |          |          |   |          |          |         |   |          |          |          |   |          |          |          |   |         |          |         |   |         |          |          |   |         |         |          |   |         |          |          |   |          |         |         |   |          |         |         |
| C                                              | -5.22922                                                                                                                                                                                                                                                                                                                                                                                                                                                                                                                                                                                                                                                                                                                                                                                                                                                                                                                                                                                                                                                                                                                                                                                                                                                                                                                                                                                                                                                                                                                                                                                                                                                                                                                                                                                                                                                                                                                                                                        | -2.29520 | -0.72695 |          |         |   |         |         |          |   |         |         |          |   |         |         |          |   |         |         |         |   |         |         |         |   |         |         |          |   |         |          |          |   |          |          |          |   |          |         |          |   |         |          |         |   |          |          |          |   |          |          |         |   |          |          |          |   |          |          |         |   |          |          |         |   |          |          |          |   |          |          |         |   |          |          |          |   |          |          |          |   |         |          |         |   |         |          |          |   |         |         |          |   |         |          |          |   |          |         |         |   |          |         |         |
| H                                              | 2.14553                                                                                                                                                                                                                                                                                                                                                                                                                                                                                                                                                                                                                                                                                                                                                                                                                                                                                                                                                                                                                                                                                                                                                                                                                                                                                                                                                                                                                                                                                                                                                                                                                                                                                                                                                                                                                                                                                                                                                                         | -1.99172 | 2.11718  |          |         |   |         |         |          |   |         |         |          |   |         |         |          |   |         |         |         |   |         |         |         |   |         |         |          |   |         |          |          |   |          |          |          |   |          |         |          |   |         |          |         |   |          |          |          |   |          |          |         |   |          |          |          |   |          |          |         |   |          |          |         |   |          |          |          |   |          |          |         |   |          |          |          |   |          |          |          |   |         |          |         |   |         |          |          |   |         |         |          |   |         |          |          |   |          |         |         |   |          |         |         |
| O                                              | 0.56991                                                                                                                                                                                                                                                                                                                                                                                                                                                                                                                                                                                                                                                                                                                                                                                                                                                                                                                                                                                                                                                                                                                                                                                                                                                                                                                                                                                                                                                                                                                                                                                                                                                                                                                                                                                                                                                                                                                                                                         | -0.08957 | -2.71342 |          |         |   |         |         |          |   |         |         |          |   |         |         |          |   |         |         |         |   |         |         |         |   |         |         |          |   |         |          |          |   |          |          |          |   |          |         |          |   |         |          |         |   |          |          |          |   |          |          |         |   |          |          |          |   |          |          |         |   |          |          |         |   |          |          |          |   |          |          |         |   |          |          |          |   |          |          |          |   |         |          |         |   |         |          |          |   |         |         |          |   |         |          |          |   |          |         |         |   |          |         |         |
| C                                              | 0.36328                                                                                                                                                                                                                                                                                                                                                                                                                                                                                                                                                                                                                                                                                                                                                                                                                                                                                                                                                                                                                                                                                                                                                                                                                                                                                                                                                                                                                                                                                                                                                                                                                                                                                                                                                                                                                                                                                                                                                                         | 1.12848  | -3.45086 |          |         |   |         |         |          |   |         |         |          |   |         |         |          |   |         |         |         |   |         |         |         |   |         |         |          |   |         |          |          |   |          |          |          |   |          |         |          |   |         |          |         |   |          |          |          |   |          |          |         |   |          |          |          |   |          |          |         |   |          |          |         |   |          |          |          |   |          |          |         |   |          |          |          |   |          |          |          |   |         |          |         |   |         |          |          |   |         |         |          |   |         |          |          |   |          |         |         |   |          |         |         |
| C                                              | 1.27656                                                                                                                                                                                                                                                                                                                                                                                                                                                                                                                                                                                                                                                                                                                                                                                                                                                                                                                                                                                                                                                                                                                                                                                                                                                                                                                                                                                                                                                                                                                                                                                                                                                                                                                                                                                                                                                                                                                                                                         | -3.79402 | -0.89130 |          |         |   |         |         |          |   |         |         |          |   |         |         |          |   |         |         |         |   |         |         |         |   |         |         |          |   |         |          |          |   |          |          |          |   |          |         |          |   |         |          |         |   |          |          |          |   |          |          |         |   |          |          |          |   |          |          |         |   |          |          |         |   |          |          |          |   |          |          |         |   |          |          |          |   |          |          |          |   |         |          |         |   |         |          |          |   |         |         |          |   |         |          |          |   |          |         |         |   |          |         |         |
| C                                              | -3.77202                                                                                                                                                                                                                                                                                                                                                                                                                                                                                                                                                                                                                                                                                                                                                                                                                                                                                                                                                                                                                                                                                                                                                                                                                                                                                                                                                                                                                                                                                                                                                                                                                                                                                                                                                                                                                                                                                                                                                                        | 2.43359  | 0.98030  |          |         |   |         |         |          |   |         |         |          |   |         |         |          |   |         |         |         |   |         |         |         |   |         |         |          |   |         |          |          |   |          |          |          |   |          |         |          |   |         |          |         |   |          |          |          |   |          |          |         |   |          |          |          |   |          |          |         |   |          |          |         |   |          |          |          |   |          |          |         |   |          |          |          |   |          |          |          |   |         |          |         |   |         |          |          |   |         |         |          |   |         |          |          |   |          |         |         |   |          |         |         |
| O                                              | -4.89001                                                                                                                                                                                                                                                                                                                                                                                                                                                                                                                                                                                                                                                                                                                                                                                                                                                                                                                                                                                                                                                                                                                                                                                                                                                                                                                                                                                                                                                                                                                                                                                                                                                                                                                                                                                                                                                                                                                                                                        | 2.82937  | 1.32161  |          |         |   |         |         |          |   |         |         |          |   |         |         |          |   |         |         |         |   |         |         |         |   |         |         |          |   |         |          |          |   |          |          |          |   |          |         |          |   |         |          |         |   |          |          |          |   |          |          |         |   |          |          |          |   |          |          |         |   |          |          |         |   |          |          |          |   |          |          |         |   |          |          |          |   |          |          |          |   |         |          |         |   |         |          |          |   |         |         |          |   |         |          |          |   |          |         |         |   |          |         |         |

|   |          |          |          |
|---|----------|----------|----------|
| C | -2.64175 | 2.39003  | 2.01977  |
| N | -1.34612 | 1.92762  | 1.56745  |
| C | -0.30389 | 2.78494  | 1.37866  |
| O | -0.38881 | 4.00243  | 1.55245  |
| C | 0.99952  | 2.13475  | 0.94218  |
| N | -3.46204 | 2.03691  | -0.27151 |
| C | -4.46809 | 1.95612  | -1.31558 |
| H | -4.57946 | -3.20288 | -2.57394 |
| H | -6.28794 | -2.40809 | -0.94478 |
| H | -5.55083 | -1.36019 | 1.19034  |
| H | -3.13317 | -1.11498 | 1.68452  |
| H | -2.17485 | -2.94086 | -2.07827 |
| H | 1.42664  | -4.51307 | -1.70552 |
| H | 0.56201  | -4.21966 | -0.18355 |
| H | 2.23969  | -3.67875 | -0.37498 |
| H | 5.47501  | -3.18008 | 1.26044  |
| H | -0.71588 | -2.88556 | 0.57752  |
| H | 4.28403  | -3.78845 | 2.43233  |
| H | 5.06733  | -2.21490 | 2.70506  |
| H | 1.46377  | -2.13365 | -2.29699 |
| H | 3.91024  | -1.47060 | 0.77669  |
| H | 3.08163  | 0.22912  | -1.59710 |
| H | 4.35846  | 3.77057  | -2.13122 |
| H | 5.39026  | 2.79305  | -3.18706 |
| H | 3.64459  | 2.50566  | -3.14172 |
| H | 6.21180  | 0.57366  | 1.17789  |
| H | 1.79014  | 2.42986  | 1.63946  |
| H | 1.27914  | 2.51929  | -0.04411 |
| H | 0.94443  | 1.04506  | 0.89659  |
| H | -1.20080 | 0.92932  | 1.40656  |
| H | -2.51856 | 3.40535  | 2.40433  |
| H | -2.99835 | 1.76416  | 2.84608  |
| H | -2.56093 | 1.60760  | -0.45053 |
| H | -3.97106 | 1.96955  | -2.28850 |
| H | -5.06348 | 1.03738  | -1.23592 |
| H | 1.14836  | 1.14575  | -4.20695 |
| H | -0.62187 | 1.12665  | -3.92373 |
| H | 0.44344  | 1.99685  | -2.79249 |
| H | -5.14129 | 2.81287  | -1.23873 |
| O | 1.32526  | -1.81877 | 2.64970  |
| H | 0.00454  | -1.23626 | 1.73143  |
| C | 1.68262  | -1.00897 | 3.76471  |
| H | 2.38174  | -1.53265 | 4.43096  |
| H | 0.76902  | -0.79300 | 4.32517  |
| H | 2.13672  | -0.05602 | 3.45840  |
| H | 6.39912  | 2.52509  | -0.43468 |

Optimized Molecular Properties for **T7-complex**

|                                                |                                                                                                                                                                                                                                                                                                                                                                                                                                                                                                                                                                                                                                                                                                                                                                                                                                                                                                                                                                                                                                                                                                                                                                                                                                                                                                                                                                                                                                                                                                                                                                                                                                                                                                                                                                                                                                                                                                                                                                                                                                                   |          |          |          |          |   |          |          |          |   |          |          |         |   |          |         |         |   |          |         |         |   |          |         |         |   |          |          |         |   |          |         |         |   |          |          |          |   |          |         |         |   |          |          |          |   |         |         |         |   |         |         |         |   |         |          |          |   |         |          |          |   |         |         |         |   |         |         |         |   |          |          |          |   |         |          |         |   |         |          |         |   |         |          |          |   |         |         |          |   |         |         |          |   |         |         |          |   |         |         |          |   |         |          |         |   |         |          |         |
|------------------------------------------------|---------------------------------------------------------------------------------------------------------------------------------------------------------------------------------------------------------------------------------------------------------------------------------------------------------------------------------------------------------------------------------------------------------------------------------------------------------------------------------------------------------------------------------------------------------------------------------------------------------------------------------------------------------------------------------------------------------------------------------------------------------------------------------------------------------------------------------------------------------------------------------------------------------------------------------------------------------------------------------------------------------------------------------------------------------------------------------------------------------------------------------------------------------------------------------------------------------------------------------------------------------------------------------------------------------------------------------------------------------------------------------------------------------------------------------------------------------------------------------------------------------------------------------------------------------------------------------------------------------------------------------------------------------------------------------------------------------------------------------------------------------------------------------------------------------------------------------------------------------------------------------------------------------------------------------------------------------------------------------------------------------------------------------------------------|----------|----------|----------|----------|---|----------|----------|----------|---|----------|----------|---------|---|----------|---------|---------|---|----------|---------|---------|---|----------|---------|---------|---|----------|----------|---------|---|----------|---------|---------|---|----------|----------|----------|---|----------|---------|---------|---|----------|----------|----------|---|---------|---------|---------|---|---------|---------|---------|---|---------|----------|----------|---|---------|----------|----------|---|---------|---------|---------|---|---------|---------|---------|---|----------|----------|----------|---|---------|----------|---------|---|---------|----------|---------|---|---------|----------|----------|---|---------|---------|----------|---|---------|---------|----------|---|---------|---------|----------|---|---------|---------|----------|---|---------|----------|---------|---|---------|----------|---------|
| Number of<br>(-)<br>Vibrational<br>Frequencies | 0                                                                                                                                                                                                                                                                                                                                                                                                                                                                                                                                                                                                                                                                                                                                                                                                                                                                                                                                                                                                                                                                                                                                                                                                                                                                                                                                                                                                                                                                                                                                                                                                                                                                                                                                                                                                                                                                                                                                                                                                                                                 |          |          |          |          |   |          |          |          |   |          |          |         |   |          |         |         |   |          |         |         |   |          |         |         |   |          |          |         |   |          |         |         |   |          |          |          |   |          |         |         |   |          |          |          |   |         |         |         |   |         |         |         |   |         |          |          |   |         |          |          |   |         |         |         |   |         |         |         |   |          |          |          |   |         |          |         |   |         |          |         |   |         |          |          |   |         |         |          |   |         |         |          |   |         |         |          |   |         |         |          |   |         |          |         |   |         |          |         |
| Absolute<br>Energies<br>(Hartrees)             | <p><b>B3LYP/6-31G(d)</b></p> <p>There are 19 positive frequencies below 100 cm<sup>-1</sup>.</p> <p>Zero-point correction: 0.433834 hartree<br/>         Enthalpy correction: 0.469163 hartree<br/>         Free Energy correction: 0.350344 hartree<br/>         Quasiharmonic Free Energy correction: 0.372445 hartree</p> <p>SCF Energy: -1296.442074 hartree<br/>         SCF Energy + ZPVE: -1296.008240 hartree<br/>         Enthalpy: -1295.972911 hartree<br/>         Free Energy: -1296.091730 hartree</p> <p>Free Energy with quasiharmonic correction: -1296.069630 hartree<br/>         (correction: 13.87 kcal/mol)</p> <p><b>B3LYP-D3/6-311+G(d,p)</b></p> <p>SCF Done: E(RB3LYP) = -1296.90269197 A.U.</p>                                                                                                                                                                                                                                                                                                                                                                                                                                                                                                                                                                                                                                                                                                                                                                                                                                                                                                                                                                                                                                                                                                                                                                                                                                                                                                                        |          |          |          |          |   |          |          |          |   |          |          |         |   |          |         |         |   |          |         |         |   |          |         |         |   |          |          |         |   |          |         |         |   |          |          |          |   |          |         |         |   |          |          |          |   |         |         |         |   |         |         |         |   |         |          |          |   |         |          |          |   |         |         |         |   |         |         |         |   |          |          |          |   |         |          |         |   |         |          |         |   |         |          |          |   |         |         |          |   |         |         |          |   |         |         |          |   |         |         |          |   |         |          |         |   |         |          |         |
| Cartesian<br>Coordinates                       | <p>53<br/>         complex-T7.out Energy: -813529.6777086</p> <table> <tbody> <tr><td>C</td><td>-7.68283</td><td>-1.53929</td><td>-0.58987</td></tr> <tr><td>O</td><td>-6.58824</td><td>-2.05173</td><td>-0.90425</td></tr> <tr><td>O</td><td>-7.88077</td><td>-0.42606</td><td>0.00390</td></tr> <tr><td>C</td><td>-5.09556</td><td>1.83434</td><td>0.99432</td></tr> <tr><td>C</td><td>-3.71732</td><td>1.84914</td><td>0.93556</td></tr> <tr><td>N</td><td>-5.47090</td><td>0.63326</td><td>0.43836</td></tr> <tr><td>C</td><td>-4.33690</td><td>-0.00886</td><td>0.07770</td></tr> <tr><td>N</td><td>-3.24049</td><td>0.68975</td><td>0.36002</td></tr> <tr><td>C</td><td>-8.97665</td><td>-2.31122</td><td>-0.94148</td></tr> <tr><td>C</td><td>-6.07930</td><td>2.83125</td><td>1.51844</td></tr> <tr><td>C</td><td>-0.54341</td><td>-0.09233</td><td>-1.19328</td></tr> <tr><td>C</td><td>1.55196</td><td>0.09424</td><td>0.12656</td></tr> <tr><td>O</td><td>2.78512</td><td>0.10380</td><td>0.18619</td></tr> <tr><td>C</td><td>0.79904</td><td>-0.12709</td><td>-1.10827</td></tr> <tr><td>H</td><td>1.42319</td><td>-0.32129</td><td>-1.97773</td></tr> <tr><td>O</td><td>0.78892</td><td>0.29461</td><td>1.21270</td></tr> <tr><td>C</td><td>1.47175</td><td>0.53734</td><td>2.44619</td></tr> <tr><td>C</td><td>-1.30828</td><td>-0.31351</td><td>-2.45550</td></tr> <tr><td>C</td><td>6.32191</td><td>-1.52315</td><td>0.52487</td></tr> <tr><td>O</td><td>7.14895</td><td>-2.38496</td><td>0.81164</td></tr> <tr><td>C</td><td>6.26936</td><td>-0.98230</td><td>-0.91241</td></tr> <tr><td>N</td><td>5.37358</td><td>0.12562</td><td>-1.17024</td></tr> <tr><td>C</td><td>5.84114</td><td>1.36427</td><td>-1.51903</td></tr> <tr><td>O</td><td>7.03069</td><td>1.61450</td><td>-1.68660</td></tr> <tr><td>C</td><td>4.76095</td><td>2.41823</td><td>-1.72344</td></tr> <tr><td>N</td><td>5.41956</td><td>-1.01228</td><td>1.40516</td></tr> <tr><td>C</td><td>5.32639</td><td>-1.49639</td><td>2.76791</td></tr> </tbody> </table> | C        | -7.68283 | -1.53929 | -0.58987 | O | -6.58824 | -2.05173 | -0.90425 | O | -7.88077 | -0.42606 | 0.00390 | C | -5.09556 | 1.83434 | 0.99432 | C | -3.71732 | 1.84914 | 0.93556 | N | -5.47090 | 0.63326 | 0.43836 | C | -4.33690 | -0.00886 | 0.07770 | N | -3.24049 | 0.68975 | 0.36002 | C | -8.97665 | -2.31122 | -0.94148 | C | -6.07930 | 2.83125 | 1.51844 | C | -0.54341 | -0.09233 | -1.19328 | C | 1.55196 | 0.09424 | 0.12656 | O | 2.78512 | 0.10380 | 0.18619 | C | 0.79904 | -0.12709 | -1.10827 | H | 1.42319 | -0.32129 | -1.97773 | O | 0.78892 | 0.29461 | 1.21270 | C | 1.47175 | 0.53734 | 2.44619 | C | -1.30828 | -0.31351 | -2.45550 | C | 6.32191 | -1.52315 | 0.52487 | O | 7.14895 | -2.38496 | 0.81164 | C | 6.26936 | -0.98230 | -0.91241 | N | 5.37358 | 0.12562 | -1.17024 | C | 5.84114 | 1.36427 | -1.51903 | O | 7.03069 | 1.61450 | -1.68660 | C | 4.76095 | 2.41823 | -1.72344 | N | 5.41956 | -1.01228 | 1.40516 | C | 5.32639 | -1.49639 | 2.76791 |
| C                                              | -7.68283                                                                                                                                                                                                                                                                                                                                                                                                                                                                                                                                                                                                                                                                                                                                                                                                                                                                                                                                                                                                                                                                                                                                                                                                                                                                                                                                                                                                                                                                                                                                                                                                                                                                                                                                                                                                                                                                                                                                                                                                                                          | -1.53929 | -0.58987 |          |          |   |          |          |          |   |          |          |         |   |          |         |         |   |          |         |         |   |          |         |         |   |          |          |         |   |          |         |         |   |          |          |          |   |          |         |         |   |          |          |          |   |         |         |         |   |         |         |         |   |         |          |          |   |         |          |          |   |         |         |         |   |         |         |         |   |          |          |          |   |         |          |         |   |         |          |         |   |         |          |          |   |         |         |          |   |         |         |          |   |         |         |          |   |         |         |          |   |         |          |         |   |         |          |         |
| O                                              | -6.58824                                                                                                                                                                                                                                                                                                                                                                                                                                                                                                                                                                                                                                                                                                                                                                                                                                                                                                                                                                                                                                                                                                                                                                                                                                                                                                                                                                                                                                                                                                                                                                                                                                                                                                                                                                                                                                                                                                                                                                                                                                          | -2.05173 | -0.90425 |          |          |   |          |          |          |   |          |          |         |   |          |         |         |   |          |         |         |   |          |         |         |   |          |          |         |   |          |         |         |   |          |          |          |   |          |         |         |   |          |          |          |   |         |         |         |   |         |         |         |   |         |          |          |   |         |          |          |   |         |         |         |   |         |         |         |   |          |          |          |   |         |          |         |   |         |          |         |   |         |          |          |   |         |         |          |   |         |         |          |   |         |         |          |   |         |         |          |   |         |          |         |   |         |          |         |
| O                                              | -7.88077                                                                                                                                                                                                                                                                                                                                                                                                                                                                                                                                                                                                                                                                                                                                                                                                                                                                                                                                                                                                                                                                                                                                                                                                                                                                                                                                                                                                                                                                                                                                                                                                                                                                                                                                                                                                                                                                                                                                                                                                                                          | -0.42606 | 0.00390  |          |          |   |          |          |          |   |          |          |         |   |          |         |         |   |          |         |         |   |          |         |         |   |          |          |         |   |          |         |         |   |          |          |          |   |          |         |         |   |          |          |          |   |         |         |         |   |         |         |         |   |         |          |          |   |         |          |          |   |         |         |         |   |         |         |         |   |          |          |          |   |         |          |         |   |         |          |         |   |         |          |          |   |         |         |          |   |         |         |          |   |         |         |          |   |         |         |          |   |         |          |         |   |         |          |         |
| C                                              | -5.09556                                                                                                                                                                                                                                                                                                                                                                                                                                                                                                                                                                                                                                                                                                                                                                                                                                                                                                                                                                                                                                                                                                                                                                                                                                                                                                                                                                                                                                                                                                                                                                                                                                                                                                                                                                                                                                                                                                                                                                                                                                          | 1.83434  | 0.99432  |          |          |   |          |          |          |   |          |          |         |   |          |         |         |   |          |         |         |   |          |         |         |   |          |          |         |   |          |         |         |   |          |          |          |   |          |         |         |   |          |          |          |   |         |         |         |   |         |         |         |   |         |          |          |   |         |          |          |   |         |         |         |   |         |         |         |   |          |          |          |   |         |          |         |   |         |          |         |   |         |          |          |   |         |         |          |   |         |         |          |   |         |         |          |   |         |         |          |   |         |          |         |   |         |          |         |
| C                                              | -3.71732                                                                                                                                                                                                                                                                                                                                                                                                                                                                                                                                                                                                                                                                                                                                                                                                                                                                                                                                                                                                                                                                                                                                                                                                                                                                                                                                                                                                                                                                                                                                                                                                                                                                                                                                                                                                                                                                                                                                                                                                                                          | 1.84914  | 0.93556  |          |          |   |          |          |          |   |          |          |         |   |          |         |         |   |          |         |         |   |          |         |         |   |          |          |         |   |          |         |         |   |          |          |          |   |          |         |         |   |          |          |          |   |         |         |         |   |         |         |         |   |         |          |          |   |         |          |          |   |         |         |         |   |         |         |         |   |          |          |          |   |         |          |         |   |         |          |         |   |         |          |          |   |         |         |          |   |         |         |          |   |         |         |          |   |         |         |          |   |         |          |         |   |         |          |         |
| N                                              | -5.47090                                                                                                                                                                                                                                                                                                                                                                                                                                                                                                                                                                                                                                                                                                                                                                                                                                                                                                                                                                                                                                                                                                                                                                                                                                                                                                                                                                                                                                                                                                                                                                                                                                                                                                                                                                                                                                                                                                                                                                                                                                          | 0.63326  | 0.43836  |          |          |   |          |          |          |   |          |          |         |   |          |         |         |   |          |         |         |   |          |         |         |   |          |          |         |   |          |         |         |   |          |          |          |   |          |         |         |   |          |          |          |   |         |         |         |   |         |         |         |   |         |          |          |   |         |          |          |   |         |         |         |   |         |         |         |   |          |          |          |   |         |          |         |   |         |          |         |   |         |          |          |   |         |         |          |   |         |         |          |   |         |         |          |   |         |         |          |   |         |          |         |   |         |          |         |
| C                                              | -4.33690                                                                                                                                                                                                                                                                                                                                                                                                                                                                                                                                                                                                                                                                                                                                                                                                                                                                                                                                                                                                                                                                                                                                                                                                                                                                                                                                                                                                                                                                                                                                                                                                                                                                                                                                                                                                                                                                                                                                                                                                                                          | -0.00886 | 0.07770  |          |          |   |          |          |          |   |          |          |         |   |          |         |         |   |          |         |         |   |          |         |         |   |          |          |         |   |          |         |         |   |          |          |          |   |          |         |         |   |          |          |          |   |         |         |         |   |         |         |         |   |         |          |          |   |         |          |          |   |         |         |         |   |         |         |         |   |          |          |          |   |         |          |         |   |         |          |         |   |         |          |          |   |         |         |          |   |         |         |          |   |         |         |          |   |         |         |          |   |         |          |         |   |         |          |         |
| N                                              | -3.24049                                                                                                                                                                                                                                                                                                                                                                                                                                                                                                                                                                                                                                                                                                                                                                                                                                                                                                                                                                                                                                                                                                                                                                                                                                                                                                                                                                                                                                                                                                                                                                                                                                                                                                                                                                                                                                                                                                                                                                                                                                          | 0.68975  | 0.36002  |          |          |   |          |          |          |   |          |          |         |   |          |         |         |   |          |         |         |   |          |         |         |   |          |          |         |   |          |         |         |   |          |          |          |   |          |         |         |   |          |          |          |   |         |         |         |   |         |         |         |   |         |          |          |   |         |          |          |   |         |         |         |   |         |         |         |   |          |          |          |   |         |          |         |   |         |          |         |   |         |          |          |   |         |         |          |   |         |         |          |   |         |         |          |   |         |         |          |   |         |          |         |   |         |          |         |
| C                                              | -8.97665                                                                                                                                                                                                                                                                                                                                                                                                                                                                                                                                                                                                                                                                                                                                                                                                                                                                                                                                                                                                                                                                                                                                                                                                                                                                                                                                                                                                                                                                                                                                                                                                                                                                                                                                                                                                                                                                                                                                                                                                                                          | -2.31122 | -0.94148 |          |          |   |          |          |          |   |          |          |         |   |          |         |         |   |          |         |         |   |          |         |         |   |          |          |         |   |          |         |         |   |          |          |          |   |          |         |         |   |          |          |          |   |         |         |         |   |         |         |         |   |         |          |          |   |         |          |          |   |         |         |         |   |         |         |         |   |          |          |          |   |         |          |         |   |         |          |         |   |         |          |          |   |         |         |          |   |         |         |          |   |         |         |          |   |         |         |          |   |         |          |         |   |         |          |         |
| C                                              | -6.07930                                                                                                                                                                                                                                                                                                                                                                                                                                                                                                                                                                                                                                                                                                                                                                                                                                                                                                                                                                                                                                                                                                                                                                                                                                                                                                                                                                                                                                                                                                                                                                                                                                                                                                                                                                                                                                                                                                                                                                                                                                          | 2.83125  | 1.51844  |          |          |   |          |          |          |   |          |          |         |   |          |         |         |   |          |         |         |   |          |         |         |   |          |          |         |   |          |         |         |   |          |          |          |   |          |         |         |   |          |          |          |   |         |         |         |   |         |         |         |   |         |          |          |   |         |          |          |   |         |         |         |   |         |         |         |   |          |          |          |   |         |          |         |   |         |          |         |   |         |          |          |   |         |         |          |   |         |         |          |   |         |         |          |   |         |         |          |   |         |          |         |   |         |          |         |
| C                                              | -0.54341                                                                                                                                                                                                                                                                                                                                                                                                                                                                                                                                                                                                                                                                                                                                                                                                                                                                                                                                                                                                                                                                                                                                                                                                                                                                                                                                                                                                                                                                                                                                                                                                                                                                                                                                                                                                                                                                                                                                                                                                                                          | -0.09233 | -1.19328 |          |          |   |          |          |          |   |          |          |         |   |          |         |         |   |          |         |         |   |          |         |         |   |          |          |         |   |          |         |         |   |          |          |          |   |          |         |         |   |          |          |          |   |         |         |         |   |         |         |         |   |         |          |          |   |         |          |          |   |         |         |         |   |         |         |         |   |          |          |          |   |         |          |         |   |         |          |         |   |         |          |          |   |         |         |          |   |         |         |          |   |         |         |          |   |         |         |          |   |         |          |         |   |         |          |         |
| C                                              | 1.55196                                                                                                                                                                                                                                                                                                                                                                                                                                                                                                                                                                                                                                                                                                                                                                                                                                                                                                                                                                                                                                                                                                                                                                                                                                                                                                                                                                                                                                                                                                                                                                                                                                                                                                                                                                                                                                                                                                                                                                                                                                           | 0.09424  | 0.12656  |          |          |   |          |          |          |   |          |          |         |   |          |         |         |   |          |         |         |   |          |         |         |   |          |          |         |   |          |         |         |   |          |          |          |   |          |         |         |   |          |          |          |   |         |         |         |   |         |         |         |   |         |          |          |   |         |          |          |   |         |         |         |   |         |         |         |   |          |          |          |   |         |          |         |   |         |          |         |   |         |          |          |   |         |         |          |   |         |         |          |   |         |         |          |   |         |         |          |   |         |          |         |   |         |          |         |
| O                                              | 2.78512                                                                                                                                                                                                                                                                                                                                                                                                                                                                                                                                                                                                                                                                                                                                                                                                                                                                                                                                                                                                                                                                                                                                                                                                                                                                                                                                                                                                                                                                                                                                                                                                                                                                                                                                                                                                                                                                                                                                                                                                                                           | 0.10380  | 0.18619  |          |          |   |          |          |          |   |          |          |         |   |          |         |         |   |          |         |         |   |          |         |         |   |          |          |         |   |          |         |         |   |          |          |          |   |          |         |         |   |          |          |          |   |         |         |         |   |         |         |         |   |         |          |          |   |         |          |          |   |         |         |         |   |         |         |         |   |          |          |          |   |         |          |         |   |         |          |         |   |         |          |          |   |         |         |          |   |         |         |          |   |         |         |          |   |         |         |          |   |         |          |         |   |         |          |         |
| C                                              | 0.79904                                                                                                                                                                                                                                                                                                                                                                                                                                                                                                                                                                                                                                                                                                                                                                                                                                                                                                                                                                                                                                                                                                                                                                                                                                                                                                                                                                                                                                                                                                                                                                                                                                                                                                                                                                                                                                                                                                                                                                                                                                           | -0.12709 | -1.10827 |          |          |   |          |          |          |   |          |          |         |   |          |         |         |   |          |         |         |   |          |         |         |   |          |          |         |   |          |         |         |   |          |          |          |   |          |         |         |   |          |          |          |   |         |         |         |   |         |         |         |   |         |          |          |   |         |          |          |   |         |         |         |   |         |         |         |   |          |          |          |   |         |          |         |   |         |          |         |   |         |          |          |   |         |         |          |   |         |         |          |   |         |         |          |   |         |         |          |   |         |          |         |   |         |          |         |
| H                                              | 1.42319                                                                                                                                                                                                                                                                                                                                                                                                                                                                                                                                                                                                                                                                                                                                                                                                                                                                                                                                                                                                                                                                                                                                                                                                                                                                                                                                                                                                                                                                                                                                                                                                                                                                                                                                                                                                                                                                                                                                                                                                                                           | -0.32129 | -1.97773 |          |          |   |          |          |          |   |          |          |         |   |          |         |         |   |          |         |         |   |          |         |         |   |          |          |         |   |          |         |         |   |          |          |          |   |          |         |         |   |          |          |          |   |         |         |         |   |         |         |         |   |         |          |          |   |         |          |          |   |         |         |         |   |         |         |         |   |          |          |          |   |         |          |         |   |         |          |         |   |         |          |          |   |         |         |          |   |         |         |          |   |         |         |          |   |         |         |          |   |         |          |         |   |         |          |         |
| O                                              | 0.78892                                                                                                                                                                                                                                                                                                                                                                                                                                                                                                                                                                                                                                                                                                                                                                                                                                                                                                                                                                                                                                                                                                                                                                                                                                                                                                                                                                                                                                                                                                                                                                                                                                                                                                                                                                                                                                                                                                                                                                                                                                           | 0.29461  | 1.21270  |          |          |   |          |          |          |   |          |          |         |   |          |         |         |   |          |         |         |   |          |         |         |   |          |          |         |   |          |         |         |   |          |          |          |   |          |         |         |   |          |          |          |   |         |         |         |   |         |         |         |   |         |          |          |   |         |          |          |   |         |         |         |   |         |         |         |   |          |          |          |   |         |          |         |   |         |          |         |   |         |          |          |   |         |         |          |   |         |         |          |   |         |         |          |   |         |         |          |   |         |          |         |   |         |          |         |
| C                                              | 1.47175                                                                                                                                                                                                                                                                                                                                                                                                                                                                                                                                                                                                                                                                                                                                                                                                                                                                                                                                                                                                                                                                                                                                                                                                                                                                                                                                                                                                                                                                                                                                                                                                                                                                                                                                                                                                                                                                                                                                                                                                                                           | 0.53734  | 2.44619  |          |          |   |          |          |          |   |          |          |         |   |          |         |         |   |          |         |         |   |          |         |         |   |          |          |         |   |          |         |         |   |          |          |          |   |          |         |         |   |          |          |          |   |         |         |         |   |         |         |         |   |         |          |          |   |         |          |          |   |         |         |         |   |         |         |         |   |          |          |          |   |         |          |         |   |         |          |         |   |         |          |          |   |         |         |          |   |         |         |          |   |         |         |          |   |         |         |          |   |         |          |         |   |         |          |         |
| C                                              | -1.30828                                                                                                                                                                                                                                                                                                                                                                                                                                                                                                                                                                                                                                                                                                                                                                                                                                                                                                                                                                                                                                                                                                                                                                                                                                                                                                                                                                                                                                                                                                                                                                                                                                                                                                                                                                                                                                                                                                                                                                                                                                          | -0.31351 | -2.45550 |          |          |   |          |          |          |   |          |          |         |   |          |         |         |   |          |         |         |   |          |         |         |   |          |          |         |   |          |         |         |   |          |          |          |   |          |         |         |   |          |          |          |   |         |         |         |   |         |         |         |   |         |          |          |   |         |          |          |   |         |         |         |   |         |         |         |   |          |          |          |   |         |          |         |   |         |          |         |   |         |          |          |   |         |         |          |   |         |         |          |   |         |         |          |   |         |         |          |   |         |          |         |   |         |          |         |
| C                                              | 6.32191                                                                                                                                                                                                                                                                                                                                                                                                                                                                                                                                                                                                                                                                                                                                                                                                                                                                                                                                                                                                                                                                                                                                                                                                                                                                                                                                                                                                                                                                                                                                                                                                                                                                                                                                                                                                                                                                                                                                                                                                                                           | -1.52315 | 0.52487  |          |          |   |          |          |          |   |          |          |         |   |          |         |         |   |          |         |         |   |          |         |         |   |          |          |         |   |          |         |         |   |          |          |          |   |          |         |         |   |          |          |          |   |         |         |         |   |         |         |         |   |         |          |          |   |         |          |          |   |         |         |         |   |         |         |         |   |          |          |          |   |         |          |         |   |         |          |         |   |         |          |          |   |         |         |          |   |         |         |          |   |         |         |          |   |         |         |          |   |         |          |         |   |         |          |         |
| O                                              | 7.14895                                                                                                                                                                                                                                                                                                                                                                                                                                                                                                                                                                                                                                                                                                                                                                                                                                                                                                                                                                                                                                                                                                                                                                                                                                                                                                                                                                                                                                                                                                                                                                                                                                                                                                                                                                                                                                                                                                                                                                                                                                           | -2.38496 | 0.81164  |          |          |   |          |          |          |   |          |          |         |   |          |         |         |   |          |         |         |   |          |         |         |   |          |          |         |   |          |         |         |   |          |          |          |   |          |         |         |   |          |          |          |   |         |         |         |   |         |         |         |   |         |          |          |   |         |          |          |   |         |         |         |   |         |         |         |   |          |          |          |   |         |          |         |   |         |          |         |   |         |          |          |   |         |         |          |   |         |         |          |   |         |         |          |   |         |         |          |   |         |          |         |   |         |          |         |
| C                                              | 6.26936                                                                                                                                                                                                                                                                                                                                                                                                                                                                                                                                                                                                                                                                                                                                                                                                                                                                                                                                                                                                                                                                                                                                                                                                                                                                                                                                                                                                                                                                                                                                                                                                                                                                                                                                                                                                                                                                                                                                                                                                                                           | -0.98230 | -0.91241 |          |          |   |          |          |          |   |          |          |         |   |          |         |         |   |          |         |         |   |          |         |         |   |          |          |         |   |          |         |         |   |          |          |          |   |          |         |         |   |          |          |          |   |         |         |         |   |         |         |         |   |         |          |          |   |         |          |          |   |         |         |         |   |         |         |         |   |          |          |          |   |         |          |         |   |         |          |         |   |         |          |          |   |         |         |          |   |         |         |          |   |         |         |          |   |         |         |          |   |         |          |         |   |         |          |         |
| N                                              | 5.37358                                                                                                                                                                                                                                                                                                                                                                                                                                                                                                                                                                                                                                                                                                                                                                                                                                                                                                                                                                                                                                                                                                                                                                                                                                                                                                                                                                                                                                                                                                                                                                                                                                                                                                                                                                                                                                                                                                                                                                                                                                           | 0.12562  | -1.17024 |          |          |   |          |          |          |   |          |          |         |   |          |         |         |   |          |         |         |   |          |         |         |   |          |          |         |   |          |         |         |   |          |          |          |   |          |         |         |   |          |          |          |   |         |         |         |   |         |         |         |   |         |          |          |   |         |          |          |   |         |         |         |   |         |         |         |   |          |          |          |   |         |          |         |   |         |          |         |   |         |          |          |   |         |         |          |   |         |         |          |   |         |         |          |   |         |         |          |   |         |          |         |   |         |          |         |
| C                                              | 5.84114                                                                                                                                                                                                                                                                                                                                                                                                                                                                                                                                                                                                                                                                                                                                                                                                                                                                                                                                                                                                                                                                                                                                                                                                                                                                                                                                                                                                                                                                                                                                                                                                                                                                                                                                                                                                                                                                                                                                                                                                                                           | 1.36427  | -1.51903 |          |          |   |          |          |          |   |          |          |         |   |          |         |         |   |          |         |         |   |          |         |         |   |          |          |         |   |          |         |         |   |          |          |          |   |          |         |         |   |          |          |          |   |         |         |         |   |         |         |         |   |         |          |          |   |         |          |          |   |         |         |         |   |         |         |         |   |          |          |          |   |         |          |         |   |         |          |         |   |         |          |          |   |         |         |          |   |         |         |          |   |         |         |          |   |         |         |          |   |         |          |         |   |         |          |         |
| O                                              | 7.03069                                                                                                                                                                                                                                                                                                                                                                                                                                                                                                                                                                                                                                                                                                                                                                                                                                                                                                                                                                                                                                                                                                                                                                                                                                                                                                                                                                                                                                                                                                                                                                                                                                                                                                                                                                                                                                                                                                                                                                                                                                           | 1.61450  | -1.68660 |          |          |   |          |          |          |   |          |          |         |   |          |         |         |   |          |         |         |   |          |         |         |   |          |          |         |   |          |         |         |   |          |          |          |   |          |         |         |   |          |          |          |   |         |         |         |   |         |         |         |   |         |          |          |   |         |          |          |   |         |         |         |   |         |         |         |   |          |          |          |   |         |          |         |   |         |          |         |   |         |          |          |   |         |         |          |   |         |         |          |   |         |         |          |   |         |         |          |   |         |          |         |   |         |          |         |
| C                                              | 4.76095                                                                                                                                                                                                                                                                                                                                                                                                                                                                                                                                                                                                                                                                                                                                                                                                                                                                                                                                                                                                                                                                                                                                                                                                                                                                                                                                                                                                                                                                                                                                                                                                                                                                                                                                                                                                                                                                                                                                                                                                                                           | 2.41823  | -1.72344 |          |          |   |          |          |          |   |          |          |         |   |          |         |         |   |          |         |         |   |          |         |         |   |          |          |         |   |          |         |         |   |          |          |          |   |          |         |         |   |          |          |          |   |         |         |         |   |         |         |         |   |         |          |          |   |         |          |          |   |         |         |         |   |         |         |         |   |          |          |          |   |         |          |         |   |         |          |         |   |         |          |          |   |         |         |          |   |         |         |          |   |         |         |          |   |         |         |          |   |         |          |         |   |         |          |         |
| N                                              | 5.41956                                                                                                                                                                                                                                                                                                                                                                                                                                                                                                                                                                                                                                                                                                                                                                                                                                                                                                                                                                                                                                                                                                                                                                                                                                                                                                                                                                                                                                                                                                                                                                                                                                                                                                                                                                                                                                                                                                                                                                                                                                           | -1.01228 | 1.40516  |          |          |   |          |          |          |   |          |          |         |   |          |         |         |   |          |         |         |   |          |         |         |   |          |          |         |   |          |         |         |   |          |          |          |   |          |         |         |   |          |          |          |   |         |         |         |   |         |         |         |   |         |          |          |   |         |          |          |   |         |         |         |   |         |         |         |   |          |          |          |   |         |          |         |   |         |          |         |   |         |          |          |   |         |         |          |   |         |         |          |   |         |         |          |   |         |         |          |   |         |          |         |   |         |          |         |
| C                                              | 5.32639                                                                                                                                                                                                                                                                                                                                                                                                                                                                                                                                                                                                                                                                                                                                                                                                                                                                                                                                                                                                                                                                                                                                                                                                                                                                                                                                                                                                                                                                                                                                                                                                                                                                                                                                                                                                                                                                                                                                                                                                                                           | -1.49639 | 2.76791  |          |          |   |          |          |          |   |          |          |         |   |          |         |         |   |          |         |         |   |          |         |         |   |          |          |         |   |          |         |         |   |          |          |          |   |          |         |         |   |          |          |          |   |         |         |         |   |         |         |         |   |         |          |          |   |         |          |          |   |         |         |         |   |         |         |         |   |          |          |          |   |         |          |         |   |         |          |         |   |         |          |          |   |         |         |          |   |         |         |          |   |         |         |          |   |         |         |          |   |         |          |         |   |         |          |         |



|   |          |          |          |
|---|----------|----------|----------|
| H | -1.96588 | -1.18595 | -2.34399 |
| H | -0.66390 | -0.46099 | -3.32895 |
| H | -1.98108 | 0.53498  | -2.63035 |
| H | -1.16843 | 0.12140  | -0.32139 |
| H | -3.04676 | 2.63042  | 1.27676  |
| H | -6.77675 | 3.16966  | 0.74042  |
| H | -6.69001 | 2.41901  | 2.33304  |
| H | -5.55507 | 3.71244  | 1.90545  |
| H | -4.39240 | -0.98409 | -0.38655 |
| H | 5.11256  | 3.36334  | -1.30127 |
| H | 3.80495  | 2.14473  | -1.26867 |
| H | 4.60911  | 2.57430  | -2.79784 |
| H | 4.37679  | 0.00926  | -1.00870 |
| H | 7.27661  | -0.64769 | -1.17004 |
| H | 6.03285  | -1.83742 | -1.55908 |
| H | 4.69998  | -0.38331 | 1.06987  |
| H | 5.40608  | -0.67063 | 3.48557  |
| H | 4.37799  | -2.02153 | 2.94272  |
| H | -9.62139 | -1.69188 | -1.57807 |
| H | 0.68530  | 0.71532  | 3.17977  |
| H | 2.07097  | -0.33148 | 2.73547  |
| H | -8.75048 | -3.25043 | -1.45555 |
| H | 2.12466  | 1.41122  | 2.36407  |
| H | -9.54526 | -2.52382 | -0.02708 |
| H | 6.15095  | -2.19297 | 2.92785  |
| H | -6.45773 | 0.23371  | 0.28272  |

Optimized Molecular Properties for **T7-TS1**

|                                                |                                                                                                                                                                                                                                                                                                                                                                                                                                                                                                                                                                                                                                                                                                                                                                                                                                                                                                                                                                                                                                                                                                                                                                                                                                                                                                                                                                                                                                                                                                                                                                                                                                                                                                                                                                                                                                                                                                                                                                                                                                           |          |          |          |          |   |          |          |          |   |          |         |         |   |          |         |         |   |          |         |          |   |          |         |          |   |          |          |          |   |          |          |          |   |          |          |          |   |          |         |         |   |          |          |          |   |         |          |         |   |         |          |         |   |         |          |          |   |         |          |          |   |         |          |         |   |         |          |         |   |          |          |          |   |         |          |          |   |         |          |          |   |         |         |          |   |         |         |          |   |         |         |          |   |         |         |          |   |         |         |         |   |         |          |         |   |         |          |         |
|------------------------------------------------|-------------------------------------------------------------------------------------------------------------------------------------------------------------------------------------------------------------------------------------------------------------------------------------------------------------------------------------------------------------------------------------------------------------------------------------------------------------------------------------------------------------------------------------------------------------------------------------------------------------------------------------------------------------------------------------------------------------------------------------------------------------------------------------------------------------------------------------------------------------------------------------------------------------------------------------------------------------------------------------------------------------------------------------------------------------------------------------------------------------------------------------------------------------------------------------------------------------------------------------------------------------------------------------------------------------------------------------------------------------------------------------------------------------------------------------------------------------------------------------------------------------------------------------------------------------------------------------------------------------------------------------------------------------------------------------------------------------------------------------------------------------------------------------------------------------------------------------------------------------------------------------------------------------------------------------------------------------------------------------------------------------------------------------------|----------|----------|----------|----------|---|----------|----------|----------|---|----------|---------|---------|---|----------|---------|---------|---|----------|---------|----------|---|----------|---------|----------|---|----------|----------|----------|---|----------|----------|----------|---|----------|----------|----------|---|----------|---------|---------|---|----------|----------|----------|---|---------|----------|---------|---|---------|----------|---------|---|---------|----------|----------|---|---------|----------|----------|---|---------|----------|---------|---|---------|----------|---------|---|----------|----------|----------|---|---------|----------|----------|---|---------|----------|----------|---|---------|---------|----------|---|---------|---------|----------|---|---------|---------|----------|---|---------|---------|----------|---|---------|---------|---------|---|---------|----------|---------|---|---------|----------|---------|
| Number of<br>(-)<br>Vibrational<br>Frequencies | 1 (-166.8481)                                                                                                                                                                                                                                                                                                                                                                                                                                                                                                                                                                                                                                                                                                                                                                                                                                                                                                                                                                                                                                                                                                                                                                                                                                                                                                                                                                                                                                                                                                                                                                                                                                                                                                                                                                                                                                                                                                                                                                                                                             |          |          |          |          |   |          |          |          |   |          |         |         |   |          |         |         |   |          |         |          |   |          |         |          |   |          |          |          |   |          |          |          |   |          |          |          |   |          |         |         |   |          |          |          |   |         |          |         |   |         |          |         |   |         |          |          |   |         |          |          |   |         |          |         |   |         |          |         |   |          |          |          |   |         |          |          |   |         |          |          |   |         |         |          |   |         |         |          |   |         |         |          |   |         |         |          |   |         |         |         |   |         |          |         |   |         |          |         |
| Absolute<br>Energies<br>(Hartrees)             | <p><b>B3LYP/6-31G(d)</b></p> <p>There are 16 positive frequencies below 100 cm<sup>-1</sup>.</p> <p>Zero-point correction: 0.434440 hartree<br/>         Enthalpy correction: 0.467790 hartree<br/>         Free Energy correction: 0.359848 hartree<br/>         Quasiharmonic Free Energy correction: 0.375141 hartree</p> <p>SCF Energy: -1296.431497 hartree<br/>         SCF Energy + ZPVE: -1295.997057 hartree<br/>         Enthalpy: -1295.963707 hartree<br/>         Free Energy: -1296.071649 hartree</p> <p>Free Energy with quasiharmonic correction: -1296.056355 hartree<br/>         (correction: 9.60 kcal/mol)</p> <p><b>B3LYP-D3/6-311+G(d,p)</b></p> <p>SCF Done: E(RB3LYP) = -1296.89498873 A.U.</p>                                                                                                                                                                                                                                                                                                                                                                                                                                                                                                                                                                                                                                                                                                                                                                                                                                                                                                                                                                                                                                                                                                                                                                                                                                                                                                                 |          |          |          |          |   |          |          |          |   |          |         |         |   |          |         |         |   |          |         |          |   |          |         |          |   |          |          |          |   |          |          |          |   |          |          |          |   |          |         |         |   |          |          |          |   |         |          |         |   |         |          |         |   |         |          |          |   |         |          |          |   |         |          |         |   |         |          |         |   |          |          |          |   |         |          |          |   |         |          |          |   |         |         |          |   |         |         |          |   |         |         |          |   |         |         |          |   |         |         |         |   |         |          |         |   |         |          |         |
| Cartesian<br>Coordinates                       | <p>53<br/>         spD3-TS1-T7.out Energy: -813813.8857267</p> <table> <tr><td>C</td><td>-7.32641</td><td>-0.36012</td><td>-0.12438</td></tr> <tr><td>O</td><td>-6.64286</td><td>-1.35412</td><td>-0.44269</td></tr> <tr><td>O</td><td>-6.89809</td><td>0.80863</td><td>0.17851</td></tr> <tr><td>C</td><td>-3.31906</td><td>1.65820</td><td>0.19105</td></tr> <tr><td>C</td><td>-2.12143</td><td>1.02586</td><td>-0.06043</td></tr> <tr><td>N</td><td>-4.29925</td><td>0.70974</td><td>-0.00600</td></tr> <tr><td>C</td><td>-3.69060</td><td>-0.43566</td><td>-0.36106</td></tr> <tr><td>N</td><td>-2.36828</td><td>-0.27837</td><td>-0.40701</td></tr> <tr><td>C</td><td>-8.86056</td><td>-0.50599</td><td>-0.07478</td></tr> <tr><td>C</td><td>-3.62559</td><td>3.06489</td><td>0.59546</td></tr> <tr><td>C</td><td>-0.84296</td><td>-1.57725</td><td>-0.77364</td></tr> <tr><td>C</td><td>1.10733</td><td>-0.77480</td><td>0.54124</td></tr> <tr><td>O</td><td>2.21447</td><td>-0.20579</td><td>0.67081</td></tr> <tr><td>C</td><td>0.38346</td><td>-0.92638</td><td>-0.66904</td></tr> <tr><td>H</td><td>0.82968</td><td>-0.45993</td><td>-1.54257</td></tr> <tr><td>O</td><td>0.50909</td><td>-1.33097</td><td>1.64159</td></tr> <tr><td>C</td><td>1.20692</td><td>-1.18775</td><td>2.87379</td></tr> <tr><td>C</td><td>-1.31972</td><td>-2.06909</td><td>-2.11826</td></tr> <tr><td>C</td><td>5.76458</td><td>-0.88601</td><td>-0.62589</td></tr> <tr><td>O</td><td>6.75565</td><td>-1.49041</td><td>-1.03344</td></tr> <tr><td>C</td><td>5.30476</td><td>0.38094</td><td>-1.36489</td></tr> <tr><td>N</td><td>4.27927</td><td>1.18129</td><td>-0.73101</td></tr> <tr><td>C</td><td>4.53360</td><td>2.44409</td><td>-0.27582</td></tr> <tr><td>O</td><td>5.60437</td><td>3.02505</td><td>-0.43901</td></tr> <tr><td>C</td><td>3.35623</td><td>3.10843</td><td>0.42733</td></tr> <tr><td>N</td><td>5.01914</td><td>-1.28165</td><td>0.43977</td></tr> <tr><td>C</td><td>5.31610</td><td>-2.50353</td><td>1.15936</td></tr> </table> | C        | -7.32641 | -0.36012 | -0.12438 | O | -6.64286 | -1.35412 | -0.44269 | O | -6.89809 | 0.80863 | 0.17851 | C | -3.31906 | 1.65820 | 0.19105 | C | -2.12143 | 1.02586 | -0.06043 | N | -4.29925 | 0.70974 | -0.00600 | C | -3.69060 | -0.43566 | -0.36106 | N | -2.36828 | -0.27837 | -0.40701 | C | -8.86056 | -0.50599 | -0.07478 | C | -3.62559 | 3.06489 | 0.59546 | C | -0.84296 | -1.57725 | -0.77364 | C | 1.10733 | -0.77480 | 0.54124 | O | 2.21447 | -0.20579 | 0.67081 | C | 0.38346 | -0.92638 | -0.66904 | H | 0.82968 | -0.45993 | -1.54257 | O | 0.50909 | -1.33097 | 1.64159 | C | 1.20692 | -1.18775 | 2.87379 | C | -1.31972 | -2.06909 | -2.11826 | C | 5.76458 | -0.88601 | -0.62589 | O | 6.75565 | -1.49041 | -1.03344 | C | 5.30476 | 0.38094 | -1.36489 | N | 4.27927 | 1.18129 | -0.73101 | C | 4.53360 | 2.44409 | -0.27582 | O | 5.60437 | 3.02505 | -0.43901 | C | 3.35623 | 3.10843 | 0.42733 | N | 5.01914 | -1.28165 | 0.43977 | C | 5.31610 | -2.50353 | 1.15936 |
| C                                              | -7.32641                                                                                                                                                                                                                                                                                                                                                                                                                                                                                                                                                                                                                                                                                                                                                                                                                                                                                                                                                                                                                                                                                                                                                                                                                                                                                                                                                                                                                                                                                                                                                                                                                                                                                                                                                                                                                                                                                                                                                                                                                                  | -0.36012 | -0.12438 |          |          |   |          |          |          |   |          |         |         |   |          |         |         |   |          |         |          |   |          |         |          |   |          |          |          |   |          |          |          |   |          |          |          |   |          |         |         |   |          |          |          |   |         |          |         |   |         |          |         |   |         |          |          |   |         |          |          |   |         |          |         |   |         |          |         |   |          |          |          |   |         |          |          |   |         |          |          |   |         |         |          |   |         |         |          |   |         |         |          |   |         |         |          |   |         |         |         |   |         |          |         |   |         |          |         |
| O                                              | -6.64286                                                                                                                                                                                                                                                                                                                                                                                                                                                                                                                                                                                                                                                                                                                                                                                                                                                                                                                                                                                                                                                                                                                                                                                                                                                                                                                                                                                                                                                                                                                                                                                                                                                                                                                                                                                                                                                                                                                                                                                                                                  | -1.35412 | -0.44269 |          |          |   |          |          |          |   |          |         |         |   |          |         |         |   |          |         |          |   |          |         |          |   |          |          |          |   |          |          |          |   |          |          |          |   |          |         |         |   |          |          |          |   |         |          |         |   |         |          |         |   |         |          |          |   |         |          |          |   |         |          |         |   |         |          |         |   |          |          |          |   |         |          |          |   |         |          |          |   |         |         |          |   |         |         |          |   |         |         |          |   |         |         |          |   |         |         |         |   |         |          |         |   |         |          |         |
| O                                              | -6.89809                                                                                                                                                                                                                                                                                                                                                                                                                                                                                                                                                                                                                                                                                                                                                                                                                                                                                                                                                                                                                                                                                                                                                                                                                                                                                                                                                                                                                                                                                                                                                                                                                                                                                                                                                                                                                                                                                                                                                                                                                                  | 0.80863  | 0.17851  |          |          |   |          |          |          |   |          |         |         |   |          |         |         |   |          |         |          |   |          |         |          |   |          |          |          |   |          |          |          |   |          |          |          |   |          |         |         |   |          |          |          |   |         |          |         |   |         |          |         |   |         |          |          |   |         |          |          |   |         |          |         |   |         |          |         |   |          |          |          |   |         |          |          |   |         |          |          |   |         |         |          |   |         |         |          |   |         |         |          |   |         |         |          |   |         |         |         |   |         |          |         |   |         |          |         |
| C                                              | -3.31906                                                                                                                                                                                                                                                                                                                                                                                                                                                                                                                                                                                                                                                                                                                                                                                                                                                                                                                                                                                                                                                                                                                                                                                                                                                                                                                                                                                                                                                                                                                                                                                                                                                                                                                                                                                                                                                                                                                                                                                                                                  | 1.65820  | 0.19105  |          |          |   |          |          |          |   |          |         |         |   |          |         |         |   |          |         |          |   |          |         |          |   |          |          |          |   |          |          |          |   |          |          |          |   |          |         |         |   |          |          |          |   |         |          |         |   |         |          |         |   |         |          |          |   |         |          |          |   |         |          |         |   |         |          |         |   |          |          |          |   |         |          |          |   |         |          |          |   |         |         |          |   |         |         |          |   |         |         |          |   |         |         |          |   |         |         |         |   |         |          |         |   |         |          |         |
| C                                              | -2.12143                                                                                                                                                                                                                                                                                                                                                                                                                                                                                                                                                                                                                                                                                                                                                                                                                                                                                                                                                                                                                                                                                                                                                                                                                                                                                                                                                                                                                                                                                                                                                                                                                                                                                                                                                                                                                                                                                                                                                                                                                                  | 1.02586  | -0.06043 |          |          |   |          |          |          |   |          |         |         |   |          |         |         |   |          |         |          |   |          |         |          |   |          |          |          |   |          |          |          |   |          |          |          |   |          |         |         |   |          |          |          |   |         |          |         |   |         |          |         |   |         |          |          |   |         |          |          |   |         |          |         |   |         |          |         |   |          |          |          |   |         |          |          |   |         |          |          |   |         |         |          |   |         |         |          |   |         |         |          |   |         |         |          |   |         |         |         |   |         |          |         |   |         |          |         |
| N                                              | -4.29925                                                                                                                                                                                                                                                                                                                                                                                                                                                                                                                                                                                                                                                                                                                                                                                                                                                                                                                                                                                                                                                                                                                                                                                                                                                                                                                                                                                                                                                                                                                                                                                                                                                                                                                                                                                                                                                                                                                                                                                                                                  | 0.70974  | -0.00600 |          |          |   |          |          |          |   |          |         |         |   |          |         |         |   |          |         |          |   |          |         |          |   |          |          |          |   |          |          |          |   |          |          |          |   |          |         |         |   |          |          |          |   |         |          |         |   |         |          |         |   |         |          |          |   |         |          |          |   |         |          |         |   |         |          |         |   |          |          |          |   |         |          |          |   |         |          |          |   |         |         |          |   |         |         |          |   |         |         |          |   |         |         |          |   |         |         |         |   |         |          |         |   |         |          |         |
| C                                              | -3.69060                                                                                                                                                                                                                                                                                                                                                                                                                                                                                                                                                                                                                                                                                                                                                                                                                                                                                                                                                                                                                                                                                                                                                                                                                                                                                                                                                                                                                                                                                                                                                                                                                                                                                                                                                                                                                                                                                                                                                                                                                                  | -0.43566 | -0.36106 |          |          |   |          |          |          |   |          |         |         |   |          |         |         |   |          |         |          |   |          |         |          |   |          |          |          |   |          |          |          |   |          |          |          |   |          |         |         |   |          |          |          |   |         |          |         |   |         |          |         |   |         |          |          |   |         |          |          |   |         |          |         |   |         |          |         |   |          |          |          |   |         |          |          |   |         |          |          |   |         |         |          |   |         |         |          |   |         |         |          |   |         |         |          |   |         |         |         |   |         |          |         |   |         |          |         |
| N                                              | -2.36828                                                                                                                                                                                                                                                                                                                                                                                                                                                                                                                                                                                                                                                                                                                                                                                                                                                                                                                                                                                                                                                                                                                                                                                                                                                                                                                                                                                                                                                                                                                                                                                                                                                                                                                                                                                                                                                                                                                                                                                                                                  | -0.27837 | -0.40701 |          |          |   |          |          |          |   |          |         |         |   |          |         |         |   |          |         |          |   |          |         |          |   |          |          |          |   |          |          |          |   |          |          |          |   |          |         |         |   |          |          |          |   |         |          |         |   |         |          |         |   |         |          |          |   |         |          |          |   |         |          |         |   |         |          |         |   |          |          |          |   |         |          |          |   |         |          |          |   |         |         |          |   |         |         |          |   |         |         |          |   |         |         |          |   |         |         |         |   |         |          |         |   |         |          |         |
| C                                              | -8.86056                                                                                                                                                                                                                                                                                                                                                                                                                                                                                                                                                                                                                                                                                                                                                                                                                                                                                                                                                                                                                                                                                                                                                                                                                                                                                                                                                                                                                                                                                                                                                                                                                                                                                                                                                                                                                                                                                                                                                                                                                                  | -0.50599 | -0.07478 |          |          |   |          |          |          |   |          |         |         |   |          |         |         |   |          |         |          |   |          |         |          |   |          |          |          |   |          |          |          |   |          |          |          |   |          |         |         |   |          |          |          |   |         |          |         |   |         |          |         |   |         |          |          |   |         |          |          |   |         |          |         |   |         |          |         |   |          |          |          |   |         |          |          |   |         |          |          |   |         |         |          |   |         |         |          |   |         |         |          |   |         |         |          |   |         |         |         |   |         |          |         |   |         |          |         |
| C                                              | -3.62559                                                                                                                                                                                                                                                                                                                                                                                                                                                                                                                                                                                                                                                                                                                                                                                                                                                                                                                                                                                                                                                                                                                                                                                                                                                                                                                                                                                                                                                                                                                                                                                                                                                                                                                                                                                                                                                                                                                                                                                                                                  | 3.06489  | 0.59546  |          |          |   |          |          |          |   |          |         |         |   |          |         |         |   |          |         |          |   |          |         |          |   |          |          |          |   |          |          |          |   |          |          |          |   |          |         |         |   |          |          |          |   |         |          |         |   |         |          |         |   |         |          |          |   |         |          |          |   |         |          |         |   |         |          |         |   |          |          |          |   |         |          |          |   |         |          |          |   |         |         |          |   |         |         |          |   |         |         |          |   |         |         |          |   |         |         |         |   |         |          |         |   |         |          |         |
| C                                              | -0.84296                                                                                                                                                                                                                                                                                                                                                                                                                                                                                                                                                                                                                                                                                                                                                                                                                                                                                                                                                                                                                                                                                                                                                                                                                                                                                                                                                                                                                                                                                                                                                                                                                                                                                                                                                                                                                                                                                                                                                                                                                                  | -1.57725 | -0.77364 |          |          |   |          |          |          |   |          |         |         |   |          |         |         |   |          |         |          |   |          |         |          |   |          |          |          |   |          |          |          |   |          |          |          |   |          |         |         |   |          |          |          |   |         |          |         |   |         |          |         |   |         |          |          |   |         |          |          |   |         |          |         |   |         |          |         |   |          |          |          |   |         |          |          |   |         |          |          |   |         |         |          |   |         |         |          |   |         |         |          |   |         |         |          |   |         |         |         |   |         |          |         |   |         |          |         |
| C                                              | 1.10733                                                                                                                                                                                                                                                                                                                                                                                                                                                                                                                                                                                                                                                                                                                                                                                                                                                                                                                                                                                                                                                                                                                                                                                                                                                                                                                                                                                                                                                                                                                                                                                                                                                                                                                                                                                                                                                                                                                                                                                                                                   | -0.77480 | 0.54124  |          |          |   |          |          |          |   |          |         |         |   |          |         |         |   |          |         |          |   |          |         |          |   |          |          |          |   |          |          |          |   |          |          |          |   |          |         |         |   |          |          |          |   |         |          |         |   |         |          |         |   |         |          |          |   |         |          |          |   |         |          |         |   |         |          |         |   |          |          |          |   |         |          |          |   |         |          |          |   |         |         |          |   |         |         |          |   |         |         |          |   |         |         |          |   |         |         |         |   |         |          |         |   |         |          |         |
| O                                              | 2.21447                                                                                                                                                                                                                                                                                                                                                                                                                                                                                                                                                                                                                                                                                                                                                                                                                                                                                                                                                                                                                                                                                                                                                                                                                                                                                                                                                                                                                                                                                                                                                                                                                                                                                                                                                                                                                                                                                                                                                                                                                                   | -0.20579 | 0.67081  |          |          |   |          |          |          |   |          |         |         |   |          |         |         |   |          |         |          |   |          |         |          |   |          |          |          |   |          |          |          |   |          |          |          |   |          |         |         |   |          |          |          |   |         |          |         |   |         |          |         |   |         |          |          |   |         |          |          |   |         |          |         |   |         |          |         |   |          |          |          |   |         |          |          |   |         |          |          |   |         |         |          |   |         |         |          |   |         |         |          |   |         |         |          |   |         |         |         |   |         |          |         |   |         |          |         |
| C                                              | 0.38346                                                                                                                                                                                                                                                                                                                                                                                                                                                                                                                                                                                                                                                                                                                                                                                                                                                                                                                                                                                                                                                                                                                                                                                                                                                                                                                                                                                                                                                                                                                                                                                                                                                                                                                                                                                                                                                                                                                                                                                                                                   | -0.92638 | -0.66904 |          |          |   |          |          |          |   |          |         |         |   |          |         |         |   |          |         |          |   |          |         |          |   |          |          |          |   |          |          |          |   |          |          |          |   |          |         |         |   |          |          |          |   |         |          |         |   |         |          |         |   |         |          |          |   |         |          |          |   |         |          |         |   |         |          |         |   |          |          |          |   |         |          |          |   |         |          |          |   |         |         |          |   |         |         |          |   |         |         |          |   |         |         |          |   |         |         |         |   |         |          |         |   |         |          |         |
| H                                              | 0.82968                                                                                                                                                                                                                                                                                                                                                                                                                                                                                                                                                                                                                                                                                                                                                                                                                                                                                                                                                                                                                                                                                                                                                                                                                                                                                                                                                                                                                                                                                                                                                                                                                                                                                                                                                                                                                                                                                                                                                                                                                                   | -0.45993 | -1.54257 |          |          |   |          |          |          |   |          |         |         |   |          |         |         |   |          |         |          |   |          |         |          |   |          |          |          |   |          |          |          |   |          |          |          |   |          |         |         |   |          |          |          |   |         |          |         |   |         |          |         |   |         |          |          |   |         |          |          |   |         |          |         |   |         |          |         |   |          |          |          |   |         |          |          |   |         |          |          |   |         |         |          |   |         |         |          |   |         |         |          |   |         |         |          |   |         |         |         |   |         |          |         |   |         |          |         |
| O                                              | 0.50909                                                                                                                                                                                                                                                                                                                                                                                                                                                                                                                                                                                                                                                                                                                                                                                                                                                                                                                                                                                                                                                                                                                                                                                                                                                                                                                                                                                                                                                                                                                                                                                                                                                                                                                                                                                                                                                                                                                                                                                                                                   | -1.33097 | 1.64159  |          |          |   |          |          |          |   |          |         |         |   |          |         |         |   |          |         |          |   |          |         |          |   |          |          |          |   |          |          |          |   |          |          |          |   |          |         |         |   |          |          |          |   |         |          |         |   |         |          |         |   |         |          |          |   |         |          |          |   |         |          |         |   |         |          |         |   |          |          |          |   |         |          |          |   |         |          |          |   |         |         |          |   |         |         |          |   |         |         |          |   |         |         |          |   |         |         |         |   |         |          |         |   |         |          |         |
| C                                              | 1.20692                                                                                                                                                                                                                                                                                                                                                                                                                                                                                                                                                                                                                                                                                                                                                                                                                                                                                                                                                                                                                                                                                                                                                                                                                                                                                                                                                                                                                                                                                                                                                                                                                                                                                                                                                                                                                                                                                                                                                                                                                                   | -1.18775 | 2.87379  |          |          |   |          |          |          |   |          |         |         |   |          |         |         |   |          |         |          |   |          |         |          |   |          |          |          |   |          |          |          |   |          |          |          |   |          |         |         |   |          |          |          |   |         |          |         |   |         |          |         |   |         |          |          |   |         |          |          |   |         |          |         |   |         |          |         |   |          |          |          |   |         |          |          |   |         |          |          |   |         |         |          |   |         |         |          |   |         |         |          |   |         |         |          |   |         |         |         |   |         |          |         |   |         |          |         |
| C                                              | -1.31972                                                                                                                                                                                                                                                                                                                                                                                                                                                                                                                                                                                                                                                                                                                                                                                                                                                                                                                                                                                                                                                                                                                                                                                                                                                                                                                                                                                                                                                                                                                                                                                                                                                                                                                                                                                                                                                                                                                                                                                                                                  | -2.06909 | -2.11826 |          |          |   |          |          |          |   |          |         |         |   |          |         |         |   |          |         |          |   |          |         |          |   |          |          |          |   |          |          |          |   |          |          |          |   |          |         |         |   |          |          |          |   |         |          |         |   |         |          |         |   |         |          |          |   |         |          |          |   |         |          |         |   |         |          |         |   |          |          |          |   |         |          |          |   |         |          |          |   |         |         |          |   |         |         |          |   |         |         |          |   |         |         |          |   |         |         |         |   |         |          |         |   |         |          |         |
| C                                              | 5.76458                                                                                                                                                                                                                                                                                                                                                                                                                                                                                                                                                                                                                                                                                                                                                                                                                                                                                                                                                                                                                                                                                                                                                                                                                                                                                                                                                                                                                                                                                                                                                                                                                                                                                                                                                                                                                                                                                                                                                                                                                                   | -0.88601 | -0.62589 |          |          |   |          |          |          |   |          |         |         |   |          |         |         |   |          |         |          |   |          |         |          |   |          |          |          |   |          |          |          |   |          |          |          |   |          |         |         |   |          |          |          |   |         |          |         |   |         |          |         |   |         |          |          |   |         |          |          |   |         |          |         |   |         |          |         |   |          |          |          |   |         |          |          |   |         |          |          |   |         |         |          |   |         |         |          |   |         |         |          |   |         |         |          |   |         |         |         |   |         |          |         |   |         |          |         |
| O                                              | 6.75565                                                                                                                                                                                                                                                                                                                                                                                                                                                                                                                                                                                                                                                                                                                                                                                                                                                                                                                                                                                                                                                                                                                                                                                                                                                                                                                                                                                                                                                                                                                                                                                                                                                                                                                                                                                                                                                                                                                                                                                                                                   | -1.49041 | -1.03344 |          |          |   |          |          |          |   |          |         |         |   |          |         |         |   |          |         |          |   |          |         |          |   |          |          |          |   |          |          |          |   |          |          |          |   |          |         |         |   |          |          |          |   |         |          |         |   |         |          |         |   |         |          |          |   |         |          |          |   |         |          |         |   |         |          |         |   |          |          |          |   |         |          |          |   |         |          |          |   |         |         |          |   |         |         |          |   |         |         |          |   |         |         |          |   |         |         |         |   |         |          |         |   |         |          |         |
| C                                              | 5.30476                                                                                                                                                                                                                                                                                                                                                                                                                                                                                                                                                                                                                                                                                                                                                                                                                                                                                                                                                                                                                                                                                                                                                                                                                                                                                                                                                                                                                                                                                                                                                                                                                                                                                                                                                                                                                                                                                                                                                                                                                                   | 0.38094  | -1.36489 |          |          |   |          |          |          |   |          |         |         |   |          |         |         |   |          |         |          |   |          |         |          |   |          |          |          |   |          |          |          |   |          |          |          |   |          |         |         |   |          |          |          |   |         |          |         |   |         |          |         |   |         |          |          |   |         |          |          |   |         |          |         |   |         |          |         |   |          |          |          |   |         |          |          |   |         |          |          |   |         |         |          |   |         |         |          |   |         |         |          |   |         |         |          |   |         |         |         |   |         |          |         |   |         |          |         |
| N                                              | 4.27927                                                                                                                                                                                                                                                                                                                                                                                                                                                                                                                                                                                                                                                                                                                                                                                                                                                                                                                                                                                                                                                                                                                                                                                                                                                                                                                                                                                                                                                                                                                                                                                                                                                                                                                                                                                                                                                                                                                                                                                                                                   | 1.18129  | -0.73101 |          |          |   |          |          |          |   |          |         |         |   |          |         |         |   |          |         |          |   |          |         |          |   |          |          |          |   |          |          |          |   |          |          |          |   |          |         |         |   |          |          |          |   |         |          |         |   |         |          |         |   |         |          |          |   |         |          |          |   |         |          |         |   |         |          |         |   |          |          |          |   |         |          |          |   |         |          |          |   |         |         |          |   |         |         |          |   |         |         |          |   |         |         |          |   |         |         |         |   |         |          |         |   |         |          |         |
| C                                              | 4.53360                                                                                                                                                                                                                                                                                                                                                                                                                                                                                                                                                                                                                                                                                                                                                                                                                                                                                                                                                                                                                                                                                                                                                                                                                                                                                                                                                                                                                                                                                                                                                                                                                                                                                                                                                                                                                                                                                                                                                                                                                                   | 2.44409  | -0.27582 |          |          |   |          |          |          |   |          |         |         |   |          |         |         |   |          |         |          |   |          |         |          |   |          |          |          |   |          |          |          |   |          |          |          |   |          |         |         |   |          |          |          |   |         |          |         |   |         |          |         |   |         |          |          |   |         |          |          |   |         |          |         |   |         |          |         |   |          |          |          |   |         |          |          |   |         |          |          |   |         |         |          |   |         |         |          |   |         |         |          |   |         |         |          |   |         |         |         |   |         |          |         |   |         |          |         |
| O                                              | 5.60437                                                                                                                                                                                                                                                                                                                                                                                                                                                                                                                                                                                                                                                                                                                                                                                                                                                                                                                                                                                                                                                                                                                                                                                                                                                                                                                                                                                                                                                                                                                                                                                                                                                                                                                                                                                                                                                                                                                                                                                                                                   | 3.02505  | -0.43901 |          |          |   |          |          |          |   |          |         |         |   |          |         |         |   |          |         |          |   |          |         |          |   |          |          |          |   |          |          |          |   |          |          |          |   |          |         |         |   |          |          |          |   |         |          |         |   |         |          |         |   |         |          |          |   |         |          |          |   |         |          |         |   |         |          |         |   |          |          |          |   |         |          |          |   |         |          |          |   |         |         |          |   |         |         |          |   |         |         |          |   |         |         |          |   |         |         |         |   |         |          |         |   |         |          |         |
| C                                              | 3.35623                                                                                                                                                                                                                                                                                                                                                                                                                                                                                                                                                                                                                                                                                                                                                                                                                                                                                                                                                                                                                                                                                                                                                                                                                                                                                                                                                                                                                                                                                                                                                                                                                                                                                                                                                                                                                                                                                                                                                                                                                                   | 3.10843  | 0.42733  |          |          |   |          |          |          |   |          |         |         |   |          |         |         |   |          |         |          |   |          |         |          |   |          |          |          |   |          |          |          |   |          |          |          |   |          |         |         |   |          |          |          |   |         |          |         |   |         |          |         |   |         |          |          |   |         |          |          |   |         |          |         |   |         |          |         |   |          |          |          |   |         |          |          |   |         |          |          |   |         |         |          |   |         |         |          |   |         |         |          |   |         |         |          |   |         |         |         |   |         |          |         |   |         |          |         |
| N                                              | 5.01914                                                                                                                                                                                                                                                                                                                                                                                                                                                                                                                                                                                                                                                                                                                                                                                                                                                                                                                                                                                                                                                                                                                                                                                                                                                                                                                                                                                                                                                                                                                                                                                                                                                                                                                                                                                                                                                                                                                                                                                                                                   | -1.28165 | 0.43977  |          |          |   |          |          |          |   |          |         |         |   |          |         |         |   |          |         |          |   |          |         |          |   |          |          |          |   |          |          |          |   |          |          |          |   |          |         |         |   |          |          |          |   |         |          |         |   |         |          |         |   |         |          |          |   |         |          |          |   |         |          |         |   |         |          |         |   |          |          |          |   |         |          |          |   |         |          |          |   |         |         |          |   |         |         |          |   |         |         |          |   |         |         |          |   |         |         |         |   |         |          |         |   |         |          |         |
| C                                              | 5.31610                                                                                                                                                                                                                                                                                                                                                                                                                                                                                                                                                                                                                                                                                                                                                                                                                                                                                                                                                                                                                                                                                                                                                                                                                                                                                                                                                                                                                                                                                                                                                                                                                                                                                                                                                                                                                                                                                                                                                                                                                                   | -2.50353 | 1.15936  |          |          |   |          |          |          |   |          |         |         |   |          |         |         |   |          |         |          |   |          |         |          |   |          |          |          |   |          |          |          |   |          |          |          |   |          |         |         |   |          |          |          |   |         |          |         |   |         |          |         |   |         |          |          |   |         |          |          |   |         |          |         |   |         |          |         |   |          |          |          |   |         |          |          |   |         |          |          |   |         |         |          |   |         |         |          |   |         |         |          |   |         |         |          |   |         |         |         |   |         |          |         |   |         |          |         |

|   |          |          |          |
|---|----------|----------|----------|
| H | -0.75957 | -2.97543 | -2.38732 |
| H | -1.14054 | -1.32096 | -2.89729 |
| H | -2.38435 | -2.31512 | -2.11402 |
| H | -1.14759 | -2.17733 | 0.07723  |
| H | -1.11031 | 1.40940  | -0.01896 |
| H | -4.25479 | 3.57408  | -0.14589 |
| H | -4.16189 | 3.10508  | 1.55220  |
| H | -2.69922 | 3.63861  | 0.70311  |
| H | -4.26416 | -1.32843 | -0.56772 |
| H | 3.73753  | 3.68652  | 1.27343  |
| H | 2.61159  | 2.38658  | 0.77410  |
| H | 2.87350  | 3.81137  | -0.26208 |
| H | 3.38819  | 0.74741  | -0.48615 |
| H | 6.18251  | 1.01808  | -1.49118 |
| H | 4.98800  | 0.05863  | -2.36644 |
| H | 4.14646  | -0.80585 | 0.65431  |
| H | 5.45658  | -2.30706 | 2.22998  |
| H | 4.50953  | -3.23965 | 1.04487  |
| H | -9.32742 | 0.21829  | -0.75372 |
| H | 0.54993  | -1.61555 | 3.63431  |
| H | 2.16056  | -1.72803 | 2.86063  |
| H | -9.16847 | -1.51832 | -0.35163 |
| H | 1.40811  | -0.13582 | 3.09865  |
| H | -9.22490 | -0.27577 | 0.93417  |
| H | 6.23754  | -2.91686 | 0.74572  |
| H | -5.39373 | 0.79509  | 0.08547  |

Optimized Molecular Properties for **T7-INT1**

|                                                |                                                                                                                                                                                                                                                                                                                                                                                                                                                                                                                                                                                                                                                                                                                           |                         |                   |
|------------------------------------------------|---------------------------------------------------------------------------------------------------------------------------------------------------------------------------------------------------------------------------------------------------------------------------------------------------------------------------------------------------------------------------------------------------------------------------------------------------------------------------------------------------------------------------------------------------------------------------------------------------------------------------------------------------------------------------------------------------------------------------|-------------------------|-------------------|
| Number of<br>(-)<br>Vibrational<br>Frequencies | 0                                                                                                                                                                                                                                                                                                                                                                                                                                                                                                                                                                                                                                                                                                                         |                         |                   |
| Absolute<br>Energies<br>(Hartrees)             | <p><b>B3LYP/6-31G(d)</b></p> <p>There are 16 positive frequencies below 100 cm<sup>-1</sup>.</p> <p>Zero-point correction: 0.436918 hartree<br/>         Enthalpy correction: 0.470053 hartree<br/>         Free Energy correction: 0.363384 hartree<br/>         Quasiharmonic Free Energy correction: 0.378197 hartree</p> <p>SCF Energy: -1296.447425 hartree<br/>         SCF Energy + ZPVE: -1296.010507 hartree<br/>         Enthalpy: -1295.977372 hartree<br/>         Free Energy: -1296.084041 hartree</p> <p>Free Energy with quasiharmonic correction: -1296.069229 hartree<br/>         (correction: 9.30 kcal/mol)</p> <p><b>B3LYP-D3/6-311+G(d,p)</b></p> <p>SCF Done: E(RB3LYP) = -1296.90856334 A.U.</p> |                         |                   |
| Cartesian<br>Coordinates                       | 53<br>spD3-INT1-T7.out                                                                                                                                                                                                                                                                                                                                                                                                                                                                                                                                                                                                                                                                                                    | Energy: -813822.4039230 |                   |
|                                                | C                                                                                                                                                                                                                                                                                                                                                                                                                                                                                                                                                                                                                                                                                                                         | -7.20539                | -0.64826 -0.29990 |
|                                                | O                                                                                                                                                                                                                                                                                                                                                                                                                                                                                                                                                                                                                                                                                                                         | -6.44510                | -1.57715 -0.52889 |
|                                                | O                                                                                                                                                                                                                                                                                                                                                                                                                                                                                                                                                                                                                                                                                                                         | -6.83850                | 0.59318 -0.01525  |
|                                                | C                                                                                                                                                                                                                                                                                                                                                                                                                                                                                                                                                                                                                                                                                                                         | -3.26816                | 1.81397 0.17566   |
|                                                | C                                                                                                                                                                                                                                                                                                                                                                                                                                                                                                                                                                                                                                                                                                                         | -2.00043                | 1.30223 0.02911   |
|                                                | N                                                                                                                                                                                                                                                                                                                                                                                                                                                                                                                                                                                                                                                                                                                         | -4.18290                | 0.79826 -0.02113  |
|                                                | C                                                                                                                                                                                                                                                                                                                                                                                                                                                                                                                                                                                                                                                                                                                         | -3.46919                | -0.29100 -0.27987 |
|                                                | N                                                                                                                                                                                                                                                                                                                                                                                                                                                                                                                                                                                                                                                                                                                         | -2.14015                | -0.03564 -0.26393 |
|                                                | C                                                                                                                                                                                                                                                                                                                                                                                                                                                                                                                                                                                                                                                                                                                         | -8.71815                | -0.80117 -0.31163 |
|                                                | C                                                                                                                                                                                                                                                                                                                                                                                                                                                                                                                                                                                                                                                                                                                         | -3.69000                | 3.21435 0.49575   |
|                                                | C                                                                                                                                                                                                                                                                                                                                                                                                                                                                                                                                                                                                                                                                                                                         | -1.01158                | -1.03472 -0.49765 |
|                                                | C                                                                                                                                                                                                                                                                                                                                                                                                                                                                                                                                                                                                                                                                                                                         | 1.11229                 | -0.53556 0.78757  |
|                                                | O                                                                                                                                                                                                                                                                                                                                                                                                                                                                                                                                                                                                                                                                                                                         | 2.29513                 | -0.09497 0.97482  |
|                                                | C                                                                                                                                                                                                                                                                                                                                                                                                                                                                                                                                                                                                                                                                                                                         | 0.33971                 | -0.43885 -0.34807 |
|                                                | H                                                                                                                                                                                                                                                                                                                                                                                                                                                                                                                                                                                                                                                                                                                         | 0.77808                 | 0.06886 -1.20267  |
|                                                | O                                                                                                                                                                                                                                                                                                                                                                                                                                                                                                                                                                                                                                                                                                                         | 0.50556                 | -1.20470 1.85960  |
|                                                | C                                                                                                                                                                                                                                                                                                                                                                                                                                                                                                                                                                                                                                                                                                                         | 1.30115                 | -1.35629 3.01967  |
|                                                | C                                                                                                                                                                                                                                                                                                                                                                                                                                                                                                                                                                                                                                                                                                                         | -1.22279                | -1.66077 -1.88556 |
|                                                | C                                                                                                                                                                                                                                                                                                                                                                                                                                                                                                                                                                                                                                                                                                                         | 5.38656                 | -1.10252 -0.88995 |
|                                                | O                                                                                                                                                                                                                                                                                                                                                                                                                                                                                                                                                                                                                                                                                                                         | 6.27789                 | -1.75463 -1.43800 |
|                                                | C                                                                                                                                                                                                                                                                                                                                                                                                                                                                                                                                                                                                                                                                                                                         | 4.98049                 | 0.25443 -1.48979  |
|                                                | N                                                                                                                                                                                                                                                                                                                                                                                                                                                                                                                                                                                                                                                                                                                         | 4.19702                 | 1.13613 -0.65156  |
|                                                | C                                                                                                                                                                                                                                                                                                                                                                                                                                                                                                                                                                                                                                                                                                                         | 4.67096                 | 2.34574 -0.24498  |
|                                                | O                                                                                                                                                                                                                                                                                                                                                                                                                                                                                                                                                                                                                                                                                                                         | 5.73186                 | 2.83980 -0.62960  |
|                                                | C                                                                                                                                                                                                                                                                                                                                                                                                                                                                                                                                                                                                                                                                                                                         | 3.74899                 | 3.08155 0.72231   |
|                                                | N                                                                                                                                                                                                                                                                                                                                                                                                                                                                                                                                                                                                                                                                                                                         | 4.70585                 | -1.52148 0.20676  |
|                                                | C                                                                                                                                                                                                                                                                                                                                                                                                                                                                                                                                                                                                                                                                                                                         | 4.96465                 | -2.81893 0.79544  |

|   |          |          |          |
|---|----------|----------|----------|
| H | -0.49263 | -2.46348 | -2.02941 |
| H | -1.06326 | -0.91123 | -2.66990 |
| H | -2.22871 | -2.07783 | -2.01509 |
| H | -1.16066 | -1.79634 | 0.27302  |
| H | -1.01885 | 1.74037  | 0.11711  |
| H | -4.31318 | 3.64195  | -0.30076 |
| H | -4.27833 | 3.25713  | 1.42166  |
| H | -2.81586 | 3.86153  | 0.62280  |
| H | -3.90464 | -1.26044 | -0.47494 |
| H | 4.36115  | 3.54070  | 1.50428  |
| H | 3.00238  | 2.42039  | 1.17143  |
| H | 3.23649  | 3.89133  | 0.18892  |
| H | 3.34180  | 0.77254  | -0.20902 |
| H | 5.90039  | 0.77931  | -1.75453 |
| H | 4.44993  | 0.03252  | -2.42746 |
| H | 3.88890  | -1.00323 | 0.54724  |
| H | 5.04613  | -2.73607 | 1.88611  |
| H | 4.16593  | -3.53795 | 0.56422  |
| H | -9.15814 | -0.11800 | -1.04647 |
| H | 0.64442  | -1.79810 | 3.77621  |
| H | 2.15700  | -2.02472 | 2.85197  |
| H | -8.98658 | -1.83069 | -0.55463 |
| H | 1.68992  | -0.39725 | 3.37863  |
| H | -9.12898 | -0.53087 | 0.66744  |
| H | 5.90370  | -3.19625 | 0.38636  |
| H | -5.80450 | 0.67746  | -0.01353 |

Optimized Molecular Properties for **T7-TS2-conformer**

|                                                |                                                                                                                                                                                                                                                                                                                                                                                                                                                                                                                                                                                                                                                                                                                            |                          |                   |
|------------------------------------------------|----------------------------------------------------------------------------------------------------------------------------------------------------------------------------------------------------------------------------------------------------------------------------------------------------------------------------------------------------------------------------------------------------------------------------------------------------------------------------------------------------------------------------------------------------------------------------------------------------------------------------------------------------------------------------------------------------------------------------|--------------------------|-------------------|
| Number of<br>(-)<br>Vibrational<br>Frequencies | 1 (-114.6451)                                                                                                                                                                                                                                                                                                                                                                                                                                                                                                                                                                                                                                                                                                              |                          |                   |
| Absolute<br>Energies<br>(Hartrees)             | <p><b>B3LYP/6-31G(d)</b></p> <p>There are 22 positive frequencies below 100 cm<sup>-1</sup>.</p> <p>Zero-point correction: 0.603422 hartree<br/>         Enthalpy correction: 0.647844 hartree<br/>         Free Energy correction: 0.515013 hartree<br/>         Quasiharmonic Free Energy correction: 0.533819 hartree</p> <p>SCF Energy: -1757.757746 hartree<br/>         SCF Energy + ZPVE: -1757.154324 hartree<br/>         Enthalpy: -1757.109902 hartree<br/>         Free Energy: -1757.242733 hartree</p> <p>Free Energy with quasiharmonic correction: -1757.223927 hartree<br/>         (correction: 11.80 kcal/mol)</p> <p><b>B3LYP-D3/6-311+G(d,p)</b></p> <p>SCF Done: E(RB3LYP) = -1758.38737524 A.U.</p> |                          |                   |
| Cartesian<br>Coordinates                       | 73<br>spD3-TS2-T7-conf.out                                                                                                                                                                                                                                                                                                                                                                                                                                                                                                                                                                                                                                                                                                 | Energy: -1103404.7281332 |                   |
|                                                | C                                                                                                                                                                                                                                                                                                                                                                                                                                                                                                                                                                                                                                                                                                                          | 7.11002                  | -0.13890 1.01391  |
|                                                | O                                                                                                                                                                                                                                                                                                                                                                                                                                                                                                                                                                                                                                                                                                                          | 6.33350                  | 0.77747 1.23147   |
|                                                | O                                                                                                                                                                                                                                                                                                                                                                                                                                                                                                                                                                                                                                                                                                                          | 6.87067                  | -1.17154 0.21326  |
|                                                | C                                                                                                                                                                                                                                                                                                                                                                                                                                                                                                                                                                                                                                                                                                                          | 3.70384                  | -1.63350 -1.81813 |
|                                                | C                                                                                                                                                                                                                                                                                                                                                                                                                                                                                                                                                                                                                                                                                                                          | 2.48637                  | -1.01962 -1.98676 |
|                                                | N                                                                                                                                                                                                                                                                                                                                                                                                                                                                                                                                                                                                                                                                                                                          | 4.42304                  | -0.93999 -0.86538 |
|                                                | C                                                                                                                                                                                                                                                                                                                                                                                                                                                                                                                                                                                                                                                                                                                          | 3.64658                  | 0.06221 -0.47531  |
|                                                | N                                                                                                                                                                                                                                                                                                                                                                                                                                                                                                                                                                                                                                                                                                                          | 2.46176                  | 0.05825 -1.12500  |
|                                                | C                                                                                                                                                                                                                                                                                                                                                                                                                                                                                                                                                                                                                                                                                                                          | 8.48843                  | -0.22455 1.64736  |
|                                                | C                                                                                                                                                                                                                                                                                                                                                                                                                                                                                                                                                                                                                                                                                                                          | 4.24949                  | -2.85249 -2.49401 |
|                                                | C                                                                                                                                                                                                                                                                                                                                                                                                                                                                                                                                                                                                                                                                                                                          | 1.36849                  | 1.06438 -0.98431  |
|                                                | C                                                                                                                                                                                                                                                                                                                                                                                                                                                                                                                                                                                                                                                                                                                          | -0.20141                 | -0.58920 0.14462  |
|                                                | O                                                                                                                                                                                                                                                                                                                                                                                                                                                                                                                                                                                                                                                                                                                          | -1.20298                 | -1.33662 0.20964  |
|                                                | C                                                                                                                                                                                                                                                                                                                                                                                                                                                                                                                                                                                                                                                                                                                          | 0.00413                  | 0.44990 -0.81357  |
|                                                | C                                                                                                                                                                                                                                                                                                                                                                                                                                                                                                                                                                                                                                                                                                                          | -1.05386                 | 1.98707 0.33977   |
|                                                | C                                                                                                                                                                                                                                                                                                                                                                                                                                                                                                                                                                                                                                                                                                                          | -1.69816                 | 2.78212 -0.76449  |
|                                                | O                                                                                                                                                                                                                                                                                                                                                                                                                                                                                                                                                                                                                                                                                                                          | -0.20567                 | 2.53981 1.09925   |
|                                                | C                                                                                                                                                                                                                                                                                                                                                                                                                                                                                                                                                                                                                                                                                                                          | -1.30292                 | 4.10771 -0.98633  |
|                                                | C                                                                                                                                                                                                                                                                                                                                                                                                                                                                                                                                                                                                                                                                                                                          | -2.74999                 | 2.25368 -1.52558  |
|                                                | C                                                                                                                                                                                                                                                                                                                                                                                                                                                                                                                                                                                                                                                                                                                          | -1.92693                 | 4.87961 -1.96714  |
|                                                | C                                                                                                                                                                                                                                                                                                                                                                                                                                                                                                                                                                                                                                                                                                                          | -3.37691                 | 3.02326 -2.50379  |
|                                                | C                                                                                                                                                                                                                                                                                                                                                                                                                                                                                                                                                                                                                                                                                                                          | -2.96391                 | 4.33992 -2.73183  |
|                                                | O                                                                                                                                                                                                                                                                                                                                                                                                                                                                                                                                                                                                                                                                                                                          | 0.76679                  | -0.64640 1.09615  |
|                                                | C                                                                                                                                                                                                                                                                                                                                                                                                                                                                                                                                                                                                                                                                                                                          | 0.55928                  | -1.52131 2.21052  |
|                                                | C                                                                                                                                                                                                                                                                                                                                                                                                                                                                                                                                                                                                                                                                                                                          | 1.43721                  | 2.01902 -2.18403  |
|                                                | C                                                                                                                                                                                                                                                                                                                                                                                                                                                                                                                                                                                                                                                                                                                          | -4.93400                 | -1.19771 1.14867  |
|                                                | O                                                                                                                                                                                                                                                                                                                                                                                                                                                                                                                                                                                                                                                                                                                          | -6.01279                 | -0.83900 1.62125  |

|   |          |          |          |
|---|----------|----------|----------|
| C | -4.90639 | -1.76598 | -0.28101 |
| N | -3.67834 | -2.39101 | -0.72779 |
| C | -3.63127 | -3.70563 | -1.09163 |
| O | -4.61932 | -4.43544 | -1.15055 |
| C | -2.24077 | -4.20760 | -1.46352 |
| N | -3.75000 | -1.07862 | 1.79618  |
| C | -3.66160 | -0.47809 | 3.11765  |
| H | -4.19208 | 2.59959  | -3.08600 |
| H | -3.45419 | 4.94199  | -3.49345 |
| H | -1.61027 | 5.90780  | -2.12999 |
| H | -0.51006 | 4.51090  | -0.36330 |
| H | -3.07486 | 1.23140  | -1.34265 |
| H | 0.71722  | 2.83123  | -2.06521 |
| H | 1.20551  | 1.49097  | -3.11711 |
| H | 2.44036  | 2.44956  | -2.27604 |
| H | 1.60863  | 1.62002  | -0.06784 |
| H | 1.64138  | -1.26042 | -2.61362 |
| H | 5.17958  | -2.63097 | -3.03312 |
| H | 4.47832  | -3.64400 | -1.76916 |
| H | 3.52873  | -3.25371 | -3.21419 |
| H | 3.92107  | 0.79270  | 0.27230  |
| H | -2.11952 | -5.21886 | -1.06539 |
| H | -1.44419 | -3.56122 | -1.08524 |
| H | -2.16016 | -4.27240 | -2.55539 |
| H | -2.79967 | -1.87769 | -0.65687 |
| H | -5.69468 | -2.51821 | -0.34915 |
| H | -5.19163 | -0.93838 | -0.94645 |
| H | -2.88114 | -1.34310 | 1.33997  |
| H | -3.73342 | -1.23582 | 3.91096  |
| H | -2.70942 | 0.05217  | 3.21567  |
| H | 9.25751  | -0.27473 | 0.86880  |
| H | 1.55294  | -1.70811 | 2.62403  |
| H | -0.06144 | -1.02055 | 2.95837  |
| H | 8.65929  | 0.64514  | 2.28387  |
| H | 0.09659  | -2.45756 | 1.88995  |
| H | 8.56942  | -1.14129 | 2.24185  |
| H | -4.49305 | 0.21970  | 3.24177  |
| O | -0.55540 | 1.28998  | 3.46429  |
| C | -0.82458 | 2.36133  | 4.33804  |
| H | -1.22339 | 1.94819  | 5.27268  |
| H | -1.56999 | 3.06432  | 3.93216  |
| H | 0.08014  | 2.94283  | 4.58700  |
| H | 5.93152  | -1.08819 | -0.19968 |
| H | -0.60554 | 0.34735  | -1.70722 |
| H | -1.73162 | 1.21756  | 0.74592  |
| H | -0.28826 | 1.69144  | 2.59302  |

Optimized Molecular Properties for INT2-T7

|                                                |                                                                                                                                                                                                                                                                                                                                                                                                                                                                                                                                                                                                                                                                                                                                                                                                                                                                                                                                                                                                                                                                                                                                                                                                                                                                                                                                                                                                                                                                                                                                                                                                                                                                                                                                                                                                                                                                                                                                                                                                                              |          |          |         |          |   |          |         |          |   |          |          |          |   |          |          |          |   |          |          |         |   |          |          |          |   |          |          |         |   |          |          |         |   |          |         |          |   |          |          |          |   |          |          |         |   |          |         |          |   |         |         |          |   |          |          |         |   |         |         |         |   |         |         |         |   |         |          |         |   |         |         |         |   |         |         |         |   |         |         |         |   |         |         |         |   |         |         |         |   |         |          |         |   |          |         |          |   |          |         |          |   |          |          |         |   |         |         |          |
|------------------------------------------------|------------------------------------------------------------------------------------------------------------------------------------------------------------------------------------------------------------------------------------------------------------------------------------------------------------------------------------------------------------------------------------------------------------------------------------------------------------------------------------------------------------------------------------------------------------------------------------------------------------------------------------------------------------------------------------------------------------------------------------------------------------------------------------------------------------------------------------------------------------------------------------------------------------------------------------------------------------------------------------------------------------------------------------------------------------------------------------------------------------------------------------------------------------------------------------------------------------------------------------------------------------------------------------------------------------------------------------------------------------------------------------------------------------------------------------------------------------------------------------------------------------------------------------------------------------------------------------------------------------------------------------------------------------------------------------------------------------------------------------------------------------------------------------------------------------------------------------------------------------------------------------------------------------------------------------------------------------------------------------------------------------------------------|----------|----------|---------|----------|---|----------|---------|----------|---|----------|----------|----------|---|----------|----------|----------|---|----------|----------|---------|---|----------|----------|----------|---|----------|----------|---------|---|----------|----------|---------|---|----------|---------|----------|---|----------|----------|----------|---|----------|----------|---------|---|----------|---------|----------|---|---------|---------|----------|---|----------|----------|---------|---|---------|---------|---------|---|---------|---------|---------|---|---------|----------|---------|---|---------|---------|---------|---|---------|---------|---------|---|---------|---------|---------|---|---------|---------|---------|---|---------|---------|---------|---|---------|----------|---------|---|----------|---------|----------|---|----------|---------|----------|---|----------|----------|---------|---|---------|---------|----------|
| Number of<br>(-)<br>Vibrational<br>Frequencies | 0                                                                                                                                                                                                                                                                                                                                                                                                                                                                                                                                                                                                                                                                                                                                                                                                                                                                                                                                                                                                                                                                                                                                                                                                                                                                                                                                                                                                                                                                                                                                                                                                                                                                                                                                                                                                                                                                                                                                                                                                                            |          |          |         |          |   |          |         |          |   |          |          |          |   |          |          |          |   |          |          |         |   |          |          |          |   |          |          |         |   |          |          |         |   |          |         |          |   |          |          |          |   |          |          |         |   |          |         |          |   |         |         |          |   |          |          |         |   |         |         |         |   |         |         |         |   |         |          |         |   |         |         |         |   |         |         |         |   |         |         |         |   |         |         |         |   |         |         |         |   |         |          |         |   |          |         |          |   |          |         |          |   |          |          |         |   |         |         |          |
| Absolute<br>Energies<br>(Hartrees)             | <p><b>B3LYP/6-31G(d)</b></p> <p>There are 21 positive frequencies below 100 cm<sup>-1</sup>.</p> <p>Zero-point correction: 0.605491 hartree<br/>         Enthalpy correction: 0.649348 hartree<br/>         Free Energy correction: 0.520287 hartree<br/>         Quasiharmonic Free Energy correction: 0.536509 hartree</p> <p>SCF Energy: -1757.770199 hartree<br/>         SCF Energy + ZPVE: -1757.164708 hartree<br/>         Enthalpy: -1757.120851 hartree<br/>         Free Energy: -1757.249912 hartree</p> <p>Free Energy with quasiharmonic correction: -1757.233691 hartree<br/>         (correction: 10.18 kcal/mol)</p> <p><b>B3LYP-D3/6-311+G(d,p)</b></p> <p>SCF Done: E(RB3LYP) = -1758.40514569 A.U.</p>                                                                                                                                                                                                                                                                                                                                                                                                                                                                                                                                                                                                                                                                                                                                                                                                                                                                                                                                                                                                                                                                                                                                                                                                                                                                                                   |          |          |         |          |   |          |         |          |   |          |          |          |   |          |          |          |   |          |          |         |   |          |          |          |   |          |          |         |   |          |          |         |   |          |         |          |   |          |          |          |   |          |          |         |   |          |         |          |   |         |         |          |   |          |          |         |   |         |         |         |   |         |         |         |   |         |          |         |   |         |         |         |   |         |         |         |   |         |         |         |   |         |         |         |   |         |         |         |   |         |          |         |   |          |         |          |   |          |         |          |   |          |          |         |   |         |         |          |
| Cartesian<br>Coordinates                       | <p>73<br/>spD3-INT2-T7.out Energy: -1103415.8792588</p> <table> <tr><td>C</td><td>-6.72511</td><td>0.99432</td><td>-1.08360</td></tr> <tr><td>O</td><td>-5.95016</td><td>1.66443</td><td>-0.41882</td></tr> <tr><td>O</td><td>-6.56506</td><td>-0.29063</td><td>-1.37997</td></tr> <tr><td>C</td><td>-3.58271</td><td>-2.38328</td><td>-0.22912</td></tr> <tr><td>C</td><td>-2.43395</td><td>-2.20192</td><td>0.50127</td></tr> <tr><td>N</td><td>-4.26842</td><td>-1.18522</td><td>-0.29072</td></tr> <tr><td>C</td><td>-3.54369</td><td>-0.30841</td><td>0.38661</td></tr> <tr><td>N</td><td>-2.41904</td><td>-0.87255</td><td>0.88783</td></tr> <tr><td>C</td><td>-8.00681</td><td>1.55381</td><td>-1.67532</td></tr> <tr><td>C</td><td>-4.09212</td><td>-3.62467</td><td>-0.89157</td></tr> <tr><td>C</td><td>-1.38941</td><td>-0.20359</td><td>1.71656</td></tr> <tr><td>C</td><td>-0.07076</td><td>0.45689</td><td>-0.36391</td></tr> <tr><td>O</td><td>0.62933</td><td>0.17274</td><td>-1.32064</td></tr> <tr><td>C</td><td>-0.03312</td><td>-0.22803</td><td>0.97647</td></tr> <tr><td>C</td><td>1.27113</td><td>0.27470</td><td>1.82822</td></tr> <tr><td>C</td><td>1.45866</td><td>1.79706</td><td>1.71155</td></tr> <tr><td>O</td><td>2.36243</td><td>-0.44479</td><td>1.49039</td></tr> <tr><td>C</td><td>2.52092</td><td>2.30984</td><td>0.96002</td></tr> <tr><td>C</td><td>0.61422</td><td>2.70138</td><td>2.37016</td></tr> <tr><td>C</td><td>2.71863</td><td>3.68773</td><td>0.84481</td></tr> <tr><td>C</td><td>0.80696</td><td>4.07952</td><td>2.26177</td></tr> <tr><td>C</td><td>1.86023</td><td>4.57957</td><td>1.49219</td></tr> <tr><td>H</td><td>0.22184</td><td>-1.27183</td><td>0.78772</td></tr> <tr><td>O</td><td>-0.94852</td><td>1.49044</td><td>-0.40261</td></tr> <tr><td>C</td><td>-0.97104</td><td>2.24424</td><td>-1.62064</td></tr> <tr><td>C</td><td>-1.34430</td><td>-0.87492</td><td>3.10083</td></tr> <tr><td>C</td><td>4.73532</td><td>0.42062</td><td>-1.94806</td></tr> </table> | C        | -6.72511 | 0.99432 | -1.08360 | O | -5.95016 | 1.66443 | -0.41882 | O | -6.56506 | -0.29063 | -1.37997 | C | -3.58271 | -2.38328 | -0.22912 | C | -2.43395 | -2.20192 | 0.50127 | N | -4.26842 | -1.18522 | -0.29072 | C | -3.54369 | -0.30841 | 0.38661 | N | -2.41904 | -0.87255 | 0.88783 | C | -8.00681 | 1.55381 | -1.67532 | C | -4.09212 | -3.62467 | -0.89157 | C | -1.38941 | -0.20359 | 1.71656 | C | -0.07076 | 0.45689 | -0.36391 | O | 0.62933 | 0.17274 | -1.32064 | C | -0.03312 | -0.22803 | 0.97647 | C | 1.27113 | 0.27470 | 1.82822 | C | 1.45866 | 1.79706 | 1.71155 | O | 2.36243 | -0.44479 | 1.49039 | C | 2.52092 | 2.30984 | 0.96002 | C | 0.61422 | 2.70138 | 2.37016 | C | 2.71863 | 3.68773 | 0.84481 | C | 0.80696 | 4.07952 | 2.26177 | C | 1.86023 | 4.57957 | 1.49219 | H | 0.22184 | -1.27183 | 0.78772 | O | -0.94852 | 1.49044 | -0.40261 | C | -0.97104 | 2.24424 | -1.62064 | C | -1.34430 | -0.87492 | 3.10083 | C | 4.73532 | 0.42062 | -1.94806 |
| C                                              | -6.72511                                                                                                                                                                                                                                                                                                                                                                                                                                                                                                                                                                                                                                                                                                                                                                                                                                                                                                                                                                                                                                                                                                                                                                                                                                                                                                                                                                                                                                                                                                                                                                                                                                                                                                                                                                                                                                                                                                                                                                                                                     | 0.99432  | -1.08360 |         |          |   |          |         |          |   |          |          |          |   |          |          |          |   |          |          |         |   |          |          |          |   |          |          |         |   |          |          |         |   |          |         |          |   |          |          |          |   |          |          |         |   |          |         |          |   |         |         |          |   |          |          |         |   |         |         |         |   |         |         |         |   |         |          |         |   |         |         |         |   |         |         |         |   |         |         |         |   |         |         |         |   |         |         |         |   |         |          |         |   |          |         |          |   |          |         |          |   |          |          |         |   |         |         |          |
| O                                              | -5.95016                                                                                                                                                                                                                                                                                                                                                                                                                                                                                                                                                                                                                                                                                                                                                                                                                                                                                                                                                                                                                                                                                                                                                                                                                                                                                                                                                                                                                                                                                                                                                                                                                                                                                                                                                                                                                                                                                                                                                                                                                     | 1.66443  | -0.41882 |         |          |   |          |         |          |   |          |          |          |   |          |          |          |   |          |          |         |   |          |          |          |   |          |          |         |   |          |          |         |   |          |         |          |   |          |          |          |   |          |          |         |   |          |         |          |   |         |         |          |   |          |          |         |   |         |         |         |   |         |         |         |   |         |          |         |   |         |         |         |   |         |         |         |   |         |         |         |   |         |         |         |   |         |         |         |   |         |          |         |   |          |         |          |   |          |         |          |   |          |          |         |   |         |         |          |
| O                                              | -6.56506                                                                                                                                                                                                                                                                                                                                                                                                                                                                                                                                                                                                                                                                                                                                                                                                                                                                                                                                                                                                                                                                                                                                                                                                                                                                                                                                                                                                                                                                                                                                                                                                                                                                                                                                                                                                                                                                                                                                                                                                                     | -0.29063 | -1.37997 |         |          |   |          |         |          |   |          |          |          |   |          |          |          |   |          |          |         |   |          |          |          |   |          |          |         |   |          |          |         |   |          |         |          |   |          |          |          |   |          |          |         |   |          |         |          |   |         |         |          |   |          |          |         |   |         |         |         |   |         |         |         |   |         |          |         |   |         |         |         |   |         |         |         |   |         |         |         |   |         |         |         |   |         |         |         |   |         |          |         |   |          |         |          |   |          |         |          |   |          |          |         |   |         |         |          |
| C                                              | -3.58271                                                                                                                                                                                                                                                                                                                                                                                                                                                                                                                                                                                                                                                                                                                                                                                                                                                                                                                                                                                                                                                                                                                                                                                                                                                                                                                                                                                                                                                                                                                                                                                                                                                                                                                                                                                                                                                                                                                                                                                                                     | -2.38328 | -0.22912 |         |          |   |          |         |          |   |          |          |          |   |          |          |          |   |          |          |         |   |          |          |          |   |          |          |         |   |          |          |         |   |          |         |          |   |          |          |          |   |          |          |         |   |          |         |          |   |         |         |          |   |          |          |         |   |         |         |         |   |         |         |         |   |         |          |         |   |         |         |         |   |         |         |         |   |         |         |         |   |         |         |         |   |         |         |         |   |         |          |         |   |          |         |          |   |          |         |          |   |          |          |         |   |         |         |          |
| C                                              | -2.43395                                                                                                                                                                                                                                                                                                                                                                                                                                                                                                                                                                                                                                                                                                                                                                                                                                                                                                                                                                                                                                                                                                                                                                                                                                                                                                                                                                                                                                                                                                                                                                                                                                                                                                                                                                                                                                                                                                                                                                                                                     | -2.20192 | 0.50127  |         |          |   |          |         |          |   |          |          |          |   |          |          |          |   |          |          |         |   |          |          |          |   |          |          |         |   |          |          |         |   |          |         |          |   |          |          |          |   |          |          |         |   |          |         |          |   |         |         |          |   |          |          |         |   |         |         |         |   |         |         |         |   |         |          |         |   |         |         |         |   |         |         |         |   |         |         |         |   |         |         |         |   |         |         |         |   |         |          |         |   |          |         |          |   |          |         |          |   |          |          |         |   |         |         |          |
| N                                              | -4.26842                                                                                                                                                                                                                                                                                                                                                                                                                                                                                                                                                                                                                                                                                                                                                                                                                                                                                                                                                                                                                                                                                                                                                                                                                                                                                                                                                                                                                                                                                                                                                                                                                                                                                                                                                                                                                                                                                                                                                                                                                     | -1.18522 | -0.29072 |         |          |   |          |         |          |   |          |          |          |   |          |          |          |   |          |          |         |   |          |          |          |   |          |          |         |   |          |          |         |   |          |         |          |   |          |          |          |   |          |          |         |   |          |         |          |   |         |         |          |   |          |          |         |   |         |         |         |   |         |         |         |   |         |          |         |   |         |         |         |   |         |         |         |   |         |         |         |   |         |         |         |   |         |         |         |   |         |          |         |   |          |         |          |   |          |         |          |   |          |          |         |   |         |         |          |
| C                                              | -3.54369                                                                                                                                                                                                                                                                                                                                                                                                                                                                                                                                                                                                                                                                                                                                                                                                                                                                                                                                                                                                                                                                                                                                                                                                                                                                                                                                                                                                                                                                                                                                                                                                                                                                                                                                                                                                                                                                                                                                                                                                                     | -0.30841 | 0.38661  |         |          |   |          |         |          |   |          |          |          |   |          |          |          |   |          |          |         |   |          |          |          |   |          |          |         |   |          |          |         |   |          |         |          |   |          |          |          |   |          |          |         |   |          |         |          |   |         |         |          |   |          |          |         |   |         |         |         |   |         |         |         |   |         |          |         |   |         |         |         |   |         |         |         |   |         |         |         |   |         |         |         |   |         |         |         |   |         |          |         |   |          |         |          |   |          |         |          |   |          |          |         |   |         |         |          |
| N                                              | -2.41904                                                                                                                                                                                                                                                                                                                                                                                                                                                                                                                                                                                                                                                                                                                                                                                                                                                                                                                                                                                                                                                                                                                                                                                                                                                                                                                                                                                                                                                                                                                                                                                                                                                                                                                                                                                                                                                                                                                                                                                                                     | -0.87255 | 0.88783  |         |          |   |          |         |          |   |          |          |          |   |          |          |          |   |          |          |         |   |          |          |          |   |          |          |         |   |          |          |         |   |          |         |          |   |          |          |          |   |          |          |         |   |          |         |          |   |         |         |          |   |          |          |         |   |         |         |         |   |         |         |         |   |         |          |         |   |         |         |         |   |         |         |         |   |         |         |         |   |         |         |         |   |         |         |         |   |         |          |         |   |          |         |          |   |          |         |          |   |          |          |         |   |         |         |          |
| C                                              | -8.00681                                                                                                                                                                                                                                                                                                                                                                                                                                                                                                                                                                                                                                                                                                                                                                                                                                                                                                                                                                                                                                                                                                                                                                                                                                                                                                                                                                                                                                                                                                                                                                                                                                                                                                                                                                                                                                                                                                                                                                                                                     | 1.55381  | -1.67532 |         |          |   |          |         |          |   |          |          |          |   |          |          |          |   |          |          |         |   |          |          |          |   |          |          |         |   |          |          |         |   |          |         |          |   |          |          |          |   |          |          |         |   |          |         |          |   |         |         |          |   |          |          |         |   |         |         |         |   |         |         |         |   |         |          |         |   |         |         |         |   |         |         |         |   |         |         |         |   |         |         |         |   |         |         |         |   |         |          |         |   |          |         |          |   |          |         |          |   |          |          |         |   |         |         |          |
| C                                              | -4.09212                                                                                                                                                                                                                                                                                                                                                                                                                                                                                                                                                                                                                                                                                                                                                                                                                                                                                                                                                                                                                                                                                                                                                                                                                                                                                                                                                                                                                                                                                                                                                                                                                                                                                                                                                                                                                                                                                                                                                                                                                     | -3.62467 | -0.89157 |         |          |   |          |         |          |   |          |          |          |   |          |          |          |   |          |          |         |   |          |          |          |   |          |          |         |   |          |          |         |   |          |         |          |   |          |          |          |   |          |          |         |   |          |         |          |   |         |         |          |   |          |          |         |   |         |         |         |   |         |         |         |   |         |          |         |   |         |         |         |   |         |         |         |   |         |         |         |   |         |         |         |   |         |         |         |   |         |          |         |   |          |         |          |   |          |         |          |   |          |          |         |   |         |         |          |
| C                                              | -1.38941                                                                                                                                                                                                                                                                                                                                                                                                                                                                                                                                                                                                                                                                                                                                                                                                                                                                                                                                                                                                                                                                                                                                                                                                                                                                                                                                                                                                                                                                                                                                                                                                                                                                                                                                                                                                                                                                                                                                                                                                                     | -0.20359 | 1.71656  |         |          |   |          |         |          |   |          |          |          |   |          |          |          |   |          |          |         |   |          |          |          |   |          |          |         |   |          |          |         |   |          |         |          |   |          |          |          |   |          |          |         |   |          |         |          |   |         |         |          |   |          |          |         |   |         |         |         |   |         |         |         |   |         |          |         |   |         |         |         |   |         |         |         |   |         |         |         |   |         |         |         |   |         |         |         |   |         |          |         |   |          |         |          |   |          |         |          |   |          |          |         |   |         |         |          |
| C                                              | -0.07076                                                                                                                                                                                                                                                                                                                                                                                                                                                                                                                                                                                                                                                                                                                                                                                                                                                                                                                                                                                                                                                                                                                                                                                                                                                                                                                                                                                                                                                                                                                                                                                                                                                                                                                                                                                                                                                                                                                                                                                                                     | 0.45689  | -0.36391 |         |          |   |          |         |          |   |          |          |          |   |          |          |          |   |          |          |         |   |          |          |          |   |          |          |         |   |          |          |         |   |          |         |          |   |          |          |          |   |          |          |         |   |          |         |          |   |         |         |          |   |          |          |         |   |         |         |         |   |         |         |         |   |         |          |         |   |         |         |         |   |         |         |         |   |         |         |         |   |         |         |         |   |         |         |         |   |         |          |         |   |          |         |          |   |          |         |          |   |          |          |         |   |         |         |          |
| O                                              | 0.62933                                                                                                                                                                                                                                                                                                                                                                                                                                                                                                                                                                                                                                                                                                                                                                                                                                                                                                                                                                                                                                                                                                                                                                                                                                                                                                                                                                                                                                                                                                                                                                                                                                                                                                                                                                                                                                                                                                                                                                                                                      | 0.17274  | -1.32064 |         |          |   |          |         |          |   |          |          |          |   |          |          |          |   |          |          |         |   |          |          |          |   |          |          |         |   |          |          |         |   |          |         |          |   |          |          |          |   |          |          |         |   |          |         |          |   |         |         |          |   |          |          |         |   |         |         |         |   |         |         |         |   |         |          |         |   |         |         |         |   |         |         |         |   |         |         |         |   |         |         |         |   |         |         |         |   |         |          |         |   |          |         |          |   |          |         |          |   |          |          |         |   |         |         |          |
| C                                              | -0.03312                                                                                                                                                                                                                                                                                                                                                                                                                                                                                                                                                                                                                                                                                                                                                                                                                                                                                                                                                                                                                                                                                                                                                                                                                                                                                                                                                                                                                                                                                                                                                                                                                                                                                                                                                                                                                                                                                                                                                                                                                     | -0.22803 | 0.97647  |         |          |   |          |         |          |   |          |          |          |   |          |          |          |   |          |          |         |   |          |          |          |   |          |          |         |   |          |          |         |   |          |         |          |   |          |          |          |   |          |          |         |   |          |         |          |   |         |         |          |   |          |          |         |   |         |         |         |   |         |         |         |   |         |          |         |   |         |         |         |   |         |         |         |   |         |         |         |   |         |         |         |   |         |         |         |   |         |          |         |   |          |         |          |   |          |         |          |   |          |          |         |   |         |         |          |
| C                                              | 1.27113                                                                                                                                                                                                                                                                                                                                                                                                                                                                                                                                                                                                                                                                                                                                                                                                                                                                                                                                                                                                                                                                                                                                                                                                                                                                                                                                                                                                                                                                                                                                                                                                                                                                                                                                                                                                                                                                                                                                                                                                                      | 0.27470  | 1.82822  |         |          |   |          |         |          |   |          |          |          |   |          |          |          |   |          |          |         |   |          |          |          |   |          |          |         |   |          |          |         |   |          |         |          |   |          |          |          |   |          |          |         |   |          |         |          |   |         |         |          |   |          |          |         |   |         |         |         |   |         |         |         |   |         |          |         |   |         |         |         |   |         |         |         |   |         |         |         |   |         |         |         |   |         |         |         |   |         |          |         |   |          |         |          |   |          |         |          |   |          |          |         |   |         |         |          |
| C                                              | 1.45866                                                                                                                                                                                                                                                                                                                                                                                                                                                                                                                                                                                                                                                                                                                                                                                                                                                                                                                                                                                                                                                                                                                                                                                                                                                                                                                                                                                                                                                                                                                                                                                                                                                                                                                                                                                                                                                                                                                                                                                                                      | 1.79706  | 1.71155  |         |          |   |          |         |          |   |          |          |          |   |          |          |          |   |          |          |         |   |          |          |          |   |          |          |         |   |          |          |         |   |          |         |          |   |          |          |          |   |          |          |         |   |          |         |          |   |         |         |          |   |          |          |         |   |         |         |         |   |         |         |         |   |         |          |         |   |         |         |         |   |         |         |         |   |         |         |         |   |         |         |         |   |         |         |         |   |         |          |         |   |          |         |          |   |          |         |          |   |          |          |         |   |         |         |          |
| O                                              | 2.36243                                                                                                                                                                                                                                                                                                                                                                                                                                                                                                                                                                                                                                                                                                                                                                                                                                                                                                                                                                                                                                                                                                                                                                                                                                                                                                                                                                                                                                                                                                                                                                                                                                                                                                                                                                                                                                                                                                                                                                                                                      | -0.44479 | 1.49039  |         |          |   |          |         |          |   |          |          |          |   |          |          |          |   |          |          |         |   |          |          |          |   |          |          |         |   |          |          |         |   |          |         |          |   |          |          |          |   |          |          |         |   |          |         |          |   |         |         |          |   |          |          |         |   |         |         |         |   |         |         |         |   |         |          |         |   |         |         |         |   |         |         |         |   |         |         |         |   |         |         |         |   |         |         |         |   |         |          |         |   |          |         |          |   |          |         |          |   |          |          |         |   |         |         |          |
| C                                              | 2.52092                                                                                                                                                                                                                                                                                                                                                                                                                                                                                                                                                                                                                                                                                                                                                                                                                                                                                                                                                                                                                                                                                                                                                                                                                                                                                                                                                                                                                                                                                                                                                                                                                                                                                                                                                                                                                                                                                                                                                                                                                      | 2.30984  | 0.96002  |         |          |   |          |         |          |   |          |          |          |   |          |          |          |   |          |          |         |   |          |          |          |   |          |          |         |   |          |          |         |   |          |         |          |   |          |          |          |   |          |          |         |   |          |         |          |   |         |         |          |   |          |          |         |   |         |         |         |   |         |         |         |   |         |          |         |   |         |         |         |   |         |         |         |   |         |         |         |   |         |         |         |   |         |         |         |   |         |          |         |   |          |         |          |   |          |         |          |   |          |          |         |   |         |         |          |
| C                                              | 0.61422                                                                                                                                                                                                                                                                                                                                                                                                                                                                                                                                                                                                                                                                                                                                                                                                                                                                                                                                                                                                                                                                                                                                                                                                                                                                                                                                                                                                                                                                                                                                                                                                                                                                                                                                                                                                                                                                                                                                                                                                                      | 2.70138  | 2.37016  |         |          |   |          |         |          |   |          |          |          |   |          |          |          |   |          |          |         |   |          |          |          |   |          |          |         |   |          |          |         |   |          |         |          |   |          |          |          |   |          |          |         |   |          |         |          |   |         |         |          |   |          |          |         |   |         |         |         |   |         |         |         |   |         |          |         |   |         |         |         |   |         |         |         |   |         |         |         |   |         |         |         |   |         |         |         |   |         |          |         |   |          |         |          |   |          |         |          |   |          |          |         |   |         |         |          |
| C                                              | 2.71863                                                                                                                                                                                                                                                                                                                                                                                                                                                                                                                                                                                                                                                                                                                                                                                                                                                                                                                                                                                                                                                                                                                                                                                                                                                                                                                                                                                                                                                                                                                                                                                                                                                                                                                                                                                                                                                                                                                                                                                                                      | 3.68773  | 0.84481  |         |          |   |          |         |          |   |          |          |          |   |          |          |          |   |          |          |         |   |          |          |          |   |          |          |         |   |          |          |         |   |          |         |          |   |          |          |          |   |          |          |         |   |          |         |          |   |         |         |          |   |          |          |         |   |         |         |         |   |         |         |         |   |         |          |         |   |         |         |         |   |         |         |         |   |         |         |         |   |         |         |         |   |         |         |         |   |         |          |         |   |          |         |          |   |          |         |          |   |          |          |         |   |         |         |          |
| C                                              | 0.80696                                                                                                                                                                                                                                                                                                                                                                                                                                                                                                                                                                                                                                                                                                                                                                                                                                                                                                                                                                                                                                                                                                                                                                                                                                                                                                                                                                                                                                                                                                                                                                                                                                                                                                                                                                                                                                                                                                                                                                                                                      | 4.07952  | 2.26177  |         |          |   |          |         |          |   |          |          |          |   |          |          |          |   |          |          |         |   |          |          |          |   |          |          |         |   |          |          |         |   |          |         |          |   |          |          |          |   |          |          |         |   |          |         |          |   |         |         |          |   |          |          |         |   |         |         |         |   |         |         |         |   |         |          |         |   |         |         |         |   |         |         |         |   |         |         |         |   |         |         |         |   |         |         |         |   |         |          |         |   |          |         |          |   |          |         |          |   |          |          |         |   |         |         |          |
| C                                              | 1.86023                                                                                                                                                                                                                                                                                                                                                                                                                                                                                                                                                                                                                                                                                                                                                                                                                                                                                                                                                                                                                                                                                                                                                                                                                                                                                                                                                                                                                                                                                                                                                                                                                                                                                                                                                                                                                                                                                                                                                                                                                      | 4.57957  | 1.49219  |         |          |   |          |         |          |   |          |          |          |   |          |          |          |   |          |          |         |   |          |          |          |   |          |          |         |   |          |          |         |   |          |         |          |   |          |          |          |   |          |          |         |   |          |         |          |   |         |         |          |   |          |          |         |   |         |         |         |   |         |         |         |   |         |          |         |   |         |         |         |   |         |         |         |   |         |         |         |   |         |         |         |   |         |         |         |   |         |          |         |   |          |         |          |   |          |         |          |   |          |          |         |   |         |         |          |
| H                                              | 0.22184                                                                                                                                                                                                                                                                                                                                                                                                                                                                                                                                                                                                                                                                                                                                                                                                                                                                                                                                                                                                                                                                                                                                                                                                                                                                                                                                                                                                                                                                                                                                                                                                                                                                                                                                                                                                                                                                                                                                                                                                                      | -1.27183 | 0.78772  |         |          |   |          |         |          |   |          |          |          |   |          |          |          |   |          |          |         |   |          |          |          |   |          |          |         |   |          |          |         |   |          |         |          |   |          |          |          |   |          |          |         |   |          |         |          |   |         |         |          |   |          |          |         |   |         |         |         |   |         |         |         |   |         |          |         |   |         |         |         |   |         |         |         |   |         |         |         |   |         |         |         |   |         |         |         |   |         |          |         |   |          |         |          |   |          |         |          |   |          |          |         |   |         |         |          |
| O                                              | -0.94852                                                                                                                                                                                                                                                                                                                                                                                                                                                                                                                                                                                                                                                                                                                                                                                                                                                                                                                                                                                                                                                                                                                                                                                                                                                                                                                                                                                                                                                                                                                                                                                                                                                                                                                                                                                                                                                                                                                                                                                                                     | 1.49044  | -0.40261 |         |          |   |          |         |          |   |          |          |          |   |          |          |          |   |          |          |         |   |          |          |          |   |          |          |         |   |          |          |         |   |          |         |          |   |          |          |          |   |          |          |         |   |          |         |          |   |         |         |          |   |          |          |         |   |         |         |         |   |         |         |         |   |         |          |         |   |         |         |         |   |         |         |         |   |         |         |         |   |         |         |         |   |         |         |         |   |         |          |         |   |          |         |          |   |          |         |          |   |          |          |         |   |         |         |          |
| C                                              | -0.97104                                                                                                                                                                                                                                                                                                                                                                                                                                                                                                                                                                                                                                                                                                                                                                                                                                                                                                                                                                                                                                                                                                                                                                                                                                                                                                                                                                                                                                                                                                                                                                                                                                                                                                                                                                                                                                                                                                                                                                                                                     | 2.24424  | -1.62064 |         |          |   |          |         |          |   |          |          |          |   |          |          |          |   |          |          |         |   |          |          |          |   |          |          |         |   |          |          |         |   |          |         |          |   |          |          |          |   |          |          |         |   |          |         |          |   |         |         |          |   |          |          |         |   |         |         |         |   |         |         |         |   |         |          |         |   |         |         |         |   |         |         |         |   |         |         |         |   |         |         |         |   |         |         |         |   |         |          |         |   |          |         |          |   |          |         |          |   |          |          |         |   |         |         |          |
| C                                              | -1.34430                                                                                                                                                                                                                                                                                                                                                                                                                                                                                                                                                                                                                                                                                                                                                                                                                                                                                                                                                                                                                                                                                                                                                                                                                                                                                                                                                                                                                                                                                                                                                                                                                                                                                                                                                                                                                                                                                                                                                                                                                     | -0.87492 | 3.10083  |         |          |   |          |         |          |   |          |          |          |   |          |          |          |   |          |          |         |   |          |          |          |   |          |          |         |   |          |          |         |   |          |         |          |   |          |          |          |   |          |          |         |   |          |         |          |   |         |         |          |   |          |          |         |   |         |         |         |   |         |         |         |   |         |          |         |   |         |         |         |   |         |         |         |   |         |         |         |   |         |         |         |   |         |         |         |   |         |          |         |   |          |         |          |   |          |         |          |   |          |          |         |   |         |         |          |
| C                                              | 4.73532                                                                                                                                                                                                                                                                                                                                                                                                                                                                                                                                                                                                                                                                                                                                                                                                                                                                                                                                                                                                                                                                                                                                                                                                                                                                                                                                                                                                                                                                                                                                                                                                                                                                                                                                                                                                                                                                                                                                                                                                                      | 0.42062  | -1.94806 |         |          |   |          |         |          |   |          |          |          |   |          |          |          |   |          |          |         |   |          |          |          |   |          |          |         |   |          |          |         |   |          |         |          |   |          |          |          |   |          |          |         |   |          |         |          |   |         |         |          |   |          |          |         |   |         |         |         |   |         |         |         |   |         |          |         |   |         |         |         |   |         |         |         |   |         |         |         |   |         |         |         |   |         |         |         |   |         |          |         |   |          |         |          |   |          |         |          |   |          |          |         |   |         |         |          |



|   |          |          |          |
|---|----------|----------|----------|
| O | 5.74894  | 1.03584  | -2.28172 |
| C | 4.84757  | -0.84967 | -1.09112 |
| N | 3.60845  | -1.51892 | -0.76967 |
| C | 3.25061  | -2.67110 | -1.40734 |
| O | 3.93991  | -3.20746 | -2.27732 |
| C | 1.90808  | -3.24181 | -0.97260 |
| N | 3.47340  | 0.79280  | -2.28247 |
| C | 3.19715  | 1.99575  | -3.03479 |
| H | 0.13999  | 4.76273  | 2.78412  |
| H | 2.01678  | 5.65299  | 1.40888  |
| H | 3.55400  | 4.06379  | 0.25782  |
| H | 3.19390  | 1.60335  | 0.48815  |
| H | -0.19884 | 2.32479  | 2.98932  |
| H | -0.88584 | -0.20916 | 3.83697  |
| H | -0.74910 | -1.79417 | 3.07754  |
| H | -2.36155 | -1.10255 | 3.43715  |
| H | 0.96410  | 0.09588  | 2.87959  |
| H | -1.74097 | 0.82598  | 1.81690  |
| H | -1.64019 | -2.88232 | 0.77131  |
| H | -5.08096 | -3.90599 | -0.50778 |
| H | -4.19311 | -3.48557 | -1.97513 |
| H | -3.41009 | -4.46366 | -0.72149 |
| H | -3.80701 | 0.73115  | 0.51758  |
| H | 1.78496  | -4.22831 | -1.42528 |
| H | 1.10382  | -2.58177 | -1.31927 |
| H | 1.83275  | -3.31318 | 0.11881  |
| H | 3.02911  | -1.13133 | -0.00069 |
| H | 5.48620  | -1.54882 | -1.63753 |
| H | 5.36969  | -0.55971 | -0.17146 |
| H | 2.69255  | 0.26136  | -1.91098 |
| H | 2.55896  | 1.77882  | -3.90024 |
| H | 2.69516  | 2.74946  | -2.41296 |
| H | -8.86888 | 0.99011  | -1.30226 |
| H | -1.77494 | 2.97170  | -1.49964 |
| H | -0.01482 | 2.75290  | -1.77121 |
| H | -8.10928 | 2.60742  | -1.41086 |
| H | -1.16837 | 1.59167  | -2.47527 |
| H | -7.99485 | 1.44287  | -2.76509 |
| H | 4.15210  | 2.39798  | -3.37934 |
| O | 1.62328  | -2.74291 | 2.45510  |
| H | 2.00039  | -1.86509 | 2.08720  |
| C | 2.52111  | -3.23709 | 3.41555  |
| H | 2.13556  | -4.19208 | 3.79873  |
| H | 2.64410  | -2.55873 | 4.27900  |
| H | 3.52733  | -3.42765 | 3.00387  |
| H | -5.69171 | -0.64255 | -0.97183 |

Table S63. Optimized Molecular Properties for **T7-TS3**

|                                                |                                                                                                                                                                                                                                                                                                                                                                                                                                                                                                                                                                                                                                                                                                                                                                                                                                                                                                                                                                                                                                                                                                                                                                                                                                                                                                                                                                                                                                                                                                                                                                                                                                                                                                                                                                                                                                                                                                                                                                                    |          |          |          |         |   |          |          |         |   |          |          |         |   |          |         |          |   |          |         |          |   |          |         |          |   |          |          |          |   |          |         |          |   |          |          |         |   |          |         |          |   |          |          |          |   |         |         |         |   |         |         |         |   |          |         |          |   |         |         |          |   |         |          |          |   |         |         |          |   |         |          |          |   |         |          |          |   |         |          |          |   |         |          |          |   |         |          |          |   |          |         |          |   |          |          |         |   |          |          |         |   |          |          |          |
|------------------------------------------------|------------------------------------------------------------------------------------------------------------------------------------------------------------------------------------------------------------------------------------------------------------------------------------------------------------------------------------------------------------------------------------------------------------------------------------------------------------------------------------------------------------------------------------------------------------------------------------------------------------------------------------------------------------------------------------------------------------------------------------------------------------------------------------------------------------------------------------------------------------------------------------------------------------------------------------------------------------------------------------------------------------------------------------------------------------------------------------------------------------------------------------------------------------------------------------------------------------------------------------------------------------------------------------------------------------------------------------------------------------------------------------------------------------------------------------------------------------------------------------------------------------------------------------------------------------------------------------------------------------------------------------------------------------------------------------------------------------------------------------------------------------------------------------------------------------------------------------------------------------------------------------------------------------------------------------------------------------------------------------|----------|----------|----------|---------|---|----------|----------|---------|---|----------|----------|---------|---|----------|---------|----------|---|----------|---------|----------|---|----------|---------|----------|---|----------|----------|----------|---|----------|---------|----------|---|----------|----------|---------|---|----------|---------|----------|---|----------|----------|----------|---|---------|---------|---------|---|---------|---------|---------|---|----------|---------|----------|---|---------|---------|----------|---|---------|----------|----------|---|---------|---------|----------|---|---------|----------|----------|---|---------|----------|----------|---|---------|----------|----------|---|---------|----------|----------|---|---------|----------|----------|---|----------|---------|----------|---|----------|----------|---------|---|----------|----------|---------|---|----------|----------|----------|
| Number of<br>(-)<br>Vibrational<br>Frequencies | 1 (-1109.2168)                                                                                                                                                                                                                                                                                                                                                                                                                                                                                                                                                                                                                                                                                                                                                                                                                                                                                                                                                                                                                                                                                                                                                                                                                                                                                                                                                                                                                                                                                                                                                                                                                                                                                                                                                                                                                                                                                                                                                                     |          |          |          |         |   |          |          |         |   |          |          |         |   |          |         |          |   |          |         |          |   |          |         |          |   |          |          |          |   |          |         |          |   |          |          |         |   |          |         |          |   |          |          |          |   |         |         |         |   |         |         |         |   |          |         |          |   |         |         |          |   |         |          |          |   |         |         |          |   |         |          |          |   |         |          |          |   |         |          |          |   |         |          |          |   |         |          |          |   |          |         |          |   |          |          |         |   |          |          |         |   |          |          |          |
| Absolute<br>Energies<br>(Hartrees)             | <p><b>B3LYP/6-31G(d)</b></p> <p>There are 21 positive frequencies below 100 cm<sup>-1</sup>.</p> <p>Zero-point correction: 0.601349 hartree<br/> Enthalpy correction: 0.644633 hartree<br/> Free Energy correction: 0.518182 hartree<br/> Quasiharmonic Free Energy correction: 0.532891 hartree</p> <p>SCF Energy: -1757.742604 hartree<br/> SCF Energy + ZPVE: -1757.141255 hartree<br/> Enthalpy: -1757.097971 hartree<br/> Free Energy: -1757.224422 hartree</p> <p>Free Energy with quasiharmonic correction: -1757.209714 hartree<br/> (correction: 9.23 kcal/mol)</p> <p><b>B3LYP-D3/6-311+G(d,p)</b></p> <p>SCF Done: E(RB3LYP) = -1758.38102468 A.U.</p>                                                                                                                                                                                                                                                                                                                                                                                                                                                                                                                                                                                                                                                                                                                                                                                                                                                                                                                                                                                                                                                                                                                                                                                                                                                                                                                  |          |          |          |         |   |          |          |         |   |          |          |         |   |          |         |          |   |          |         |          |   |          |         |          |   |          |          |          |   |          |         |          |   |          |          |         |   |          |         |          |   |          |          |          |   |         |         |         |   |         |         |         |   |          |         |          |   |         |         |          |   |         |          |          |   |         |         |          |   |         |          |          |   |         |          |          |   |         |          |          |   |         |          |          |   |         |          |          |   |          |         |          |   |          |          |         |   |          |          |         |   |          |          |          |
| Cartesian<br>Coordinates                       | <p>73<br/> spD3-TS3-T7.out Energy: -1103400.7430966</p> <table> <tbody> <tr><td>C</td><td>-6.85631</td><td>-1.54834</td><td>1.39785</td></tr> <tr><td>O</td><td>-5.87045</td><td>-2.24439</td><td>1.20696</td></tr> <tr><td>O</td><td>-6.99571</td><td>-0.28997</td><td>1.00254</td></tr> <tr><td>C</td><td>-4.36846</td><td>1.68084</td><td>-0.89496</td></tr> <tr><td>C</td><td>-3.09026</td><td>1.49932</td><td>-1.36439</td></tr> <tr><td>N</td><td>-4.78897</td><td>0.52239</td><td>-0.26715</td></tr> <tr><td>C</td><td>-3.77958</td><td>-0.32986</td><td>-0.35707</td></tr> <tr><td>N</td><td>-2.72428</td><td>0.21337</td><td>-1.00693</td></tr> <tr><td>C</td><td>-8.08705</td><td>-2.04695</td><td>2.13728</td></tr> <tr><td>C</td><td>-5.24039</td><td>2.89402</td><td>-0.98698</td></tr> <tr><td>C</td><td>-1.47709</td><td>-0.50596</td><td>-1.37845</td></tr> <tr><td>C</td><td>0.07003</td><td>0.01981</td><td>0.56183</td></tr> <tr><td>O</td><td>1.12718</td><td>0.24133</td><td>1.15334</td></tr> <tr><td>C</td><td>-0.20423</td><td>0.20713</td><td>-0.86302</td></tr> <tr><td>C</td><td>1.05902</td><td>0.12677</td><td>-1.75621</td></tr> <tr><td>C</td><td>1.91063</td><td>-1.13939</td><td>-1.69280</td></tr> <tr><td>O</td><td>1.92712</td><td>1.25084</td><td>-1.55959</td></tr> <tr><td>C</td><td>3.19143</td><td>-1.12680</td><td>-2.26801</td></tr> <tr><td>C</td><td>1.43871</td><td>-2.34654</td><td>-1.16474</td></tr> <tr><td>C</td><td>3.97573</td><td>-2.27868</td><td>-2.30526</td></tr> <tr><td>C</td><td>2.21886</td><td>-3.50601</td><td>-1.20722</td></tr> <tr><td>C</td><td>3.49196</td><td>-3.47707</td><td>-1.77473</td></tr> <tr><td>H</td><td>-0.39012</td><td>1.54532</td><td>-1.05712</td></tr> <tr><td>O</td><td>-1.02903</td><td>-0.40627</td><td>1.26963</td></tr> <tr><td>C</td><td>-0.85904</td><td>-0.48769</td><td>2.68380</td></tr> <tr><td>C</td><td>-1.52200</td><td>-0.75867</td><td>-2.89556</td></tr> </tbody> </table> | C        | -6.85631 | -1.54834 | 1.39785 | O | -5.87045 | -2.24439 | 1.20696 | O | -6.99571 | -0.28997 | 1.00254 | C | -4.36846 | 1.68084 | -0.89496 | C | -3.09026 | 1.49932 | -1.36439 | N | -4.78897 | 0.52239 | -0.26715 | C | -3.77958 | -0.32986 | -0.35707 | N | -2.72428 | 0.21337 | -1.00693 | C | -8.08705 | -2.04695 | 2.13728 | C | -5.24039 | 2.89402 | -0.98698 | C | -1.47709 | -0.50596 | -1.37845 | C | 0.07003 | 0.01981 | 0.56183 | O | 1.12718 | 0.24133 | 1.15334 | C | -0.20423 | 0.20713 | -0.86302 | C | 1.05902 | 0.12677 | -1.75621 | C | 1.91063 | -1.13939 | -1.69280 | O | 1.92712 | 1.25084 | -1.55959 | C | 3.19143 | -1.12680 | -2.26801 | C | 1.43871 | -2.34654 | -1.16474 | C | 3.97573 | -2.27868 | -2.30526 | C | 2.21886 | -3.50601 | -1.20722 | C | 3.49196 | -3.47707 | -1.77473 | H | -0.39012 | 1.54532 | -1.05712 | O | -1.02903 | -0.40627 | 1.26963 | C | -0.85904 | -0.48769 | 2.68380 | C | -1.52200 | -0.75867 | -2.89556 |
| C                                              | -6.85631                                                                                                                                                                                                                                                                                                                                                                                                                                                                                                                                                                                                                                                                                                                                                                                                                                                                                                                                                                                                                                                                                                                                                                                                                                                                                                                                                                                                                                                                                                                                                                                                                                                                                                                                                                                                                                                                                                                                                                           | -1.54834 | 1.39785  |          |         |   |          |          |         |   |          |          |         |   |          |         |          |   |          |         |          |   |          |         |          |   |          |          |          |   |          |         |          |   |          |          |         |   |          |         |          |   |          |          |          |   |         |         |         |   |         |         |         |   |          |         |          |   |         |         |          |   |         |          |          |   |         |         |          |   |         |          |          |   |         |          |          |   |         |          |          |   |         |          |          |   |         |          |          |   |          |         |          |   |          |          |         |   |          |          |         |   |          |          |          |
| O                                              | -5.87045                                                                                                                                                                                                                                                                                                                                                                                                                                                                                                                                                                                                                                                                                                                                                                                                                                                                                                                                                                                                                                                                                                                                                                                                                                                                                                                                                                                                                                                                                                                                                                                                                                                                                                                                                                                                                                                                                                                                                                           | -2.24439 | 1.20696  |          |         |   |          |          |         |   |          |          |         |   |          |         |          |   |          |         |          |   |          |         |          |   |          |          |          |   |          |         |          |   |          |          |         |   |          |         |          |   |          |          |          |   |         |         |         |   |         |         |         |   |          |         |          |   |         |         |          |   |         |          |          |   |         |         |          |   |         |          |          |   |         |          |          |   |         |          |          |   |         |          |          |   |         |          |          |   |          |         |          |   |          |          |         |   |          |          |         |   |          |          |          |
| O                                              | -6.99571                                                                                                                                                                                                                                                                                                                                                                                                                                                                                                                                                                                                                                                                                                                                                                                                                                                                                                                                                                                                                                                                                                                                                                                                                                                                                                                                                                                                                                                                                                                                                                                                                                                                                                                                                                                                                                                                                                                                                                           | -0.28997 | 1.00254  |          |         |   |          |          |         |   |          |          |         |   |          |         |          |   |          |         |          |   |          |         |          |   |          |          |          |   |          |         |          |   |          |          |         |   |          |         |          |   |          |          |          |   |         |         |         |   |         |         |         |   |          |         |          |   |         |         |          |   |         |          |          |   |         |         |          |   |         |          |          |   |         |          |          |   |         |          |          |   |         |          |          |   |         |          |          |   |          |         |          |   |          |          |         |   |          |          |         |   |          |          |          |
| C                                              | -4.36846                                                                                                                                                                                                                                                                                                                                                                                                                                                                                                                                                                                                                                                                                                                                                                                                                                                                                                                                                                                                                                                                                                                                                                                                                                                                                                                                                                                                                                                                                                                                                                                                                                                                                                                                                                                                                                                                                                                                                                           | 1.68084  | -0.89496 |          |         |   |          |          |         |   |          |          |         |   |          |         |          |   |          |         |          |   |          |         |          |   |          |          |          |   |          |         |          |   |          |          |         |   |          |         |          |   |          |          |          |   |         |         |         |   |         |         |         |   |          |         |          |   |         |         |          |   |         |          |          |   |         |         |          |   |         |          |          |   |         |          |          |   |         |          |          |   |         |          |          |   |         |          |          |   |          |         |          |   |          |          |         |   |          |          |         |   |          |          |          |
| C                                              | -3.09026                                                                                                                                                                                                                                                                                                                                                                                                                                                                                                                                                                                                                                                                                                                                                                                                                                                                                                                                                                                                                                                                                                                                                                                                                                                                                                                                                                                                                                                                                                                                                                                                                                                                                                                                                                                                                                                                                                                                                                           | 1.49932  | -1.36439 |          |         |   |          |          |         |   |          |          |         |   |          |         |          |   |          |         |          |   |          |         |          |   |          |          |          |   |          |         |          |   |          |          |         |   |          |         |          |   |          |          |          |   |         |         |         |   |         |         |         |   |          |         |          |   |         |         |          |   |         |          |          |   |         |         |          |   |         |          |          |   |         |          |          |   |         |          |          |   |         |          |          |   |         |          |          |   |          |         |          |   |          |          |         |   |          |          |         |   |          |          |          |
| N                                              | -4.78897                                                                                                                                                                                                                                                                                                                                                                                                                                                                                                                                                                                                                                                                                                                                                                                                                                                                                                                                                                                                                                                                                                                                                                                                                                                                                                                                                                                                                                                                                                                                                                                                                                                                                                                                                                                                                                                                                                                                                                           | 0.52239  | -0.26715 |          |         |   |          |          |         |   |          |          |         |   |          |         |          |   |          |         |          |   |          |         |          |   |          |          |          |   |          |         |          |   |          |          |         |   |          |         |          |   |          |          |          |   |         |         |         |   |         |         |         |   |          |         |          |   |         |         |          |   |         |          |          |   |         |         |          |   |         |          |          |   |         |          |          |   |         |          |          |   |         |          |          |   |         |          |          |   |          |         |          |   |          |          |         |   |          |          |         |   |          |          |          |
| C                                              | -3.77958                                                                                                                                                                                                                                                                                                                                                                                                                                                                                                                                                                                                                                                                                                                                                                                                                                                                                                                                                                                                                                                                                                                                                                                                                                                                                                                                                                                                                                                                                                                                                                                                                                                                                                                                                                                                                                                                                                                                                                           | -0.32986 | -0.35707 |          |         |   |          |          |         |   |          |          |         |   |          |         |          |   |          |         |          |   |          |         |          |   |          |          |          |   |          |         |          |   |          |          |         |   |          |         |          |   |          |          |          |   |         |         |         |   |         |         |         |   |          |         |          |   |         |         |          |   |         |          |          |   |         |         |          |   |         |          |          |   |         |          |          |   |         |          |          |   |         |          |          |   |         |          |          |   |          |         |          |   |          |          |         |   |          |          |         |   |          |          |          |
| N                                              | -2.72428                                                                                                                                                                                                                                                                                                                                                                                                                                                                                                                                                                                                                                                                                                                                                                                                                                                                                                                                                                                                                                                                                                                                                                                                                                                                                                                                                                                                                                                                                                                                                                                                                                                                                                                                                                                                                                                                                                                                                                           | 0.21337  | -1.00693 |          |         |   |          |          |         |   |          |          |         |   |          |         |          |   |          |         |          |   |          |         |          |   |          |          |          |   |          |         |          |   |          |          |         |   |          |         |          |   |          |          |          |   |         |         |         |   |         |         |         |   |          |         |          |   |         |         |          |   |         |          |          |   |         |         |          |   |         |          |          |   |         |          |          |   |         |          |          |   |         |          |          |   |         |          |          |   |          |         |          |   |          |          |         |   |          |          |         |   |          |          |          |
| C                                              | -8.08705                                                                                                                                                                                                                                                                                                                                                                                                                                                                                                                                                                                                                                                                                                                                                                                                                                                                                                                                                                                                                                                                                                                                                                                                                                                                                                                                                                                                                                                                                                                                                                                                                                                                                                                                                                                                                                                                                                                                                                           | -2.04695 | 2.13728  |          |         |   |          |          |         |   |          |          |         |   |          |         |          |   |          |         |          |   |          |         |          |   |          |          |          |   |          |         |          |   |          |          |         |   |          |         |          |   |          |          |          |   |         |         |         |   |         |         |         |   |          |         |          |   |         |         |          |   |         |          |          |   |         |         |          |   |         |          |          |   |         |          |          |   |         |          |          |   |         |          |          |   |         |          |          |   |          |         |          |   |          |          |         |   |          |          |         |   |          |          |          |
| C                                              | -5.24039                                                                                                                                                                                                                                                                                                                                                                                                                                                                                                                                                                                                                                                                                                                                                                                                                                                                                                                                                                                                                                                                                                                                                                                                                                                                                                                                                                                                                                                                                                                                                                                                                                                                                                                                                                                                                                                                                                                                                                           | 2.89402  | -0.98698 |          |         |   |          |          |         |   |          |          |         |   |          |         |          |   |          |         |          |   |          |         |          |   |          |          |          |   |          |         |          |   |          |          |         |   |          |         |          |   |          |          |          |   |         |         |         |   |         |         |         |   |          |         |          |   |         |         |          |   |         |          |          |   |         |         |          |   |         |          |          |   |         |          |          |   |         |          |          |   |         |          |          |   |         |          |          |   |          |         |          |   |          |          |         |   |          |          |         |   |          |          |          |
| C                                              | -1.47709                                                                                                                                                                                                                                                                                                                                                                                                                                                                                                                                                                                                                                                                                                                                                                                                                                                                                                                                                                                                                                                                                                                                                                                                                                                                                                                                                                                                                                                                                                                                                                                                                                                                                                                                                                                                                                                                                                                                                                           | -0.50596 | -1.37845 |          |         |   |          |          |         |   |          |          |         |   |          |         |          |   |          |         |          |   |          |         |          |   |          |          |          |   |          |         |          |   |          |          |         |   |          |         |          |   |          |          |          |   |         |         |         |   |         |         |         |   |          |         |          |   |         |         |          |   |         |          |          |   |         |         |          |   |         |          |          |   |         |          |          |   |         |          |          |   |         |          |          |   |         |          |          |   |          |         |          |   |          |          |         |   |          |          |         |   |          |          |          |
| C                                              | 0.07003                                                                                                                                                                                                                                                                                                                                                                                                                                                                                                                                                                                                                                                                                                                                                                                                                                                                                                                                                                                                                                                                                                                                                                                                                                                                                                                                                                                                                                                                                                                                                                                                                                                                                                                                                                                                                                                                                                                                                                            | 0.01981  | 0.56183  |          |         |   |          |          |         |   |          |          |         |   |          |         |          |   |          |         |          |   |          |         |          |   |          |          |          |   |          |         |          |   |          |          |         |   |          |         |          |   |          |          |          |   |         |         |         |   |         |         |         |   |          |         |          |   |         |         |          |   |         |          |          |   |         |         |          |   |         |          |          |   |         |          |          |   |         |          |          |   |         |          |          |   |         |          |          |   |          |         |          |   |          |          |         |   |          |          |         |   |          |          |          |
| O                                              | 1.12718                                                                                                                                                                                                                                                                                                                                                                                                                                                                                                                                                                                                                                                                                                                                                                                                                                                                                                                                                                                                                                                                                                                                                                                                                                                                                                                                                                                                                                                                                                                                                                                                                                                                                                                                                                                                                                                                                                                                                                            | 0.24133  | 1.15334  |          |         |   |          |          |         |   |          |          |         |   |          |         |          |   |          |         |          |   |          |         |          |   |          |          |          |   |          |         |          |   |          |          |         |   |          |         |          |   |          |          |          |   |         |         |         |   |         |         |         |   |          |         |          |   |         |         |          |   |         |          |          |   |         |         |          |   |         |          |          |   |         |          |          |   |         |          |          |   |         |          |          |   |         |          |          |   |          |         |          |   |          |          |         |   |          |          |         |   |          |          |          |
| C                                              | -0.20423                                                                                                                                                                                                                                                                                                                                                                                                                                                                                                                                                                                                                                                                                                                                                                                                                                                                                                                                                                                                                                                                                                                                                                                                                                                                                                                                                                                                                                                                                                                                                                                                                                                                                                                                                                                                                                                                                                                                                                           | 0.20713  | -0.86302 |          |         |   |          |          |         |   |          |          |         |   |          |         |          |   |          |         |          |   |          |         |          |   |          |          |          |   |          |         |          |   |          |          |         |   |          |         |          |   |          |          |          |   |         |         |         |   |         |         |         |   |          |         |          |   |         |         |          |   |         |          |          |   |         |         |          |   |         |          |          |   |         |          |          |   |         |          |          |   |         |          |          |   |         |          |          |   |          |         |          |   |          |          |         |   |          |          |         |   |          |          |          |
| C                                              | 1.05902                                                                                                                                                                                                                                                                                                                                                                                                                                                                                                                                                                                                                                                                                                                                                                                                                                                                                                                                                                                                                                                                                                                                                                                                                                                                                                                                                                                                                                                                                                                                                                                                                                                                                                                                                                                                                                                                                                                                                                            | 0.12677  | -1.75621 |          |         |   |          |          |         |   |          |          |         |   |          |         |          |   |          |         |          |   |          |         |          |   |          |          |          |   |          |         |          |   |          |          |         |   |          |         |          |   |          |          |          |   |         |         |         |   |         |         |         |   |          |         |          |   |         |         |          |   |         |          |          |   |         |         |          |   |         |          |          |   |         |          |          |   |         |          |          |   |         |          |          |   |         |          |          |   |          |         |          |   |          |          |         |   |          |          |         |   |          |          |          |
| C                                              | 1.91063                                                                                                                                                                                                                                                                                                                                                                                                                                                                                                                                                                                                                                                                                                                                                                                                                                                                                                                                                                                                                                                                                                                                                                                                                                                                                                                                                                                                                                                                                                                                                                                                                                                                                                                                                                                                                                                                                                                                                                            | -1.13939 | -1.69280 |          |         |   |          |          |         |   |          |          |         |   |          |         |          |   |          |         |          |   |          |         |          |   |          |          |          |   |          |         |          |   |          |          |         |   |          |         |          |   |          |          |          |   |         |         |         |   |         |         |         |   |          |         |          |   |         |         |          |   |         |          |          |   |         |         |          |   |         |          |          |   |         |          |          |   |         |          |          |   |         |          |          |   |         |          |          |   |          |         |          |   |          |          |         |   |          |          |         |   |          |          |          |
| O                                              | 1.92712                                                                                                                                                                                                                                                                                                                                                                                                                                                                                                                                                                                                                                                                                                                                                                                                                                                                                                                                                                                                                                                                                                                                                                                                                                                                                                                                                                                                                                                                                                                                                                                                                                                                                                                                                                                                                                                                                                                                                                            | 1.25084  | -1.55959 |          |         |   |          |          |         |   |          |          |         |   |          |         |          |   |          |         |          |   |          |         |          |   |          |          |          |   |          |         |          |   |          |          |         |   |          |         |          |   |          |          |          |   |         |         |         |   |         |         |         |   |          |         |          |   |         |         |          |   |         |          |          |   |         |         |          |   |         |          |          |   |         |          |          |   |         |          |          |   |         |          |          |   |         |          |          |   |          |         |          |   |          |          |         |   |          |          |         |   |          |          |          |
| C                                              | 3.19143                                                                                                                                                                                                                                                                                                                                                                                                                                                                                                                                                                                                                                                                                                                                                                                                                                                                                                                                                                                                                                                                                                                                                                                                                                                                                                                                                                                                                                                                                                                                                                                                                                                                                                                                                                                                                                                                                                                                                                            | -1.12680 | -2.26801 |          |         |   |          |          |         |   |          |          |         |   |          |         |          |   |          |         |          |   |          |         |          |   |          |          |          |   |          |         |          |   |          |          |         |   |          |         |          |   |          |          |          |   |         |         |         |   |         |         |         |   |          |         |          |   |         |         |          |   |         |          |          |   |         |         |          |   |         |          |          |   |         |          |          |   |         |          |          |   |         |          |          |   |         |          |          |   |          |         |          |   |          |          |         |   |          |          |         |   |          |          |          |
| C                                              | 1.43871                                                                                                                                                                                                                                                                                                                                                                                                                                                                                                                                                                                                                                                                                                                                                                                                                                                                                                                                                                                                                                                                                                                                                                                                                                                                                                                                                                                                                                                                                                                                                                                                                                                                                                                                                                                                                                                                                                                                                                            | -2.34654 | -1.16474 |          |         |   |          |          |         |   |          |          |         |   |          |         |          |   |          |         |          |   |          |         |          |   |          |          |          |   |          |         |          |   |          |          |         |   |          |         |          |   |          |          |          |   |         |         |         |   |         |         |         |   |          |         |          |   |         |         |          |   |         |          |          |   |         |         |          |   |         |          |          |   |         |          |          |   |         |          |          |   |         |          |          |   |         |          |          |   |          |         |          |   |          |          |         |   |          |          |         |   |          |          |          |
| C                                              | 3.97573                                                                                                                                                                                                                                                                                                                                                                                                                                                                                                                                                                                                                                                                                                                                                                                                                                                                                                                                                                                                                                                                                                                                                                                                                                                                                                                                                                                                                                                                                                                                                                                                                                                                                                                                                                                                                                                                                                                                                                            | -2.27868 | -2.30526 |          |         |   |          |          |         |   |          |          |         |   |          |         |          |   |          |         |          |   |          |         |          |   |          |          |          |   |          |         |          |   |          |          |         |   |          |         |          |   |          |          |          |   |         |         |         |   |         |         |         |   |          |         |          |   |         |         |          |   |         |          |          |   |         |         |          |   |         |          |          |   |         |          |          |   |         |          |          |   |         |          |          |   |         |          |          |   |          |         |          |   |          |          |         |   |          |          |         |   |          |          |          |
| C                                              | 2.21886                                                                                                                                                                                                                                                                                                                                                                                                                                                                                                                                                                                                                                                                                                                                                                                                                                                                                                                                                                                                                                                                                                                                                                                                                                                                                                                                                                                                                                                                                                                                                                                                                                                                                                                                                                                                                                                                                                                                                                            | -3.50601 | -1.20722 |          |         |   |          |          |         |   |          |          |         |   |          |         |          |   |          |         |          |   |          |         |          |   |          |          |          |   |          |         |          |   |          |          |         |   |          |         |          |   |          |          |          |   |         |         |         |   |         |         |         |   |          |         |          |   |         |         |          |   |         |          |          |   |         |         |          |   |         |          |          |   |         |          |          |   |         |          |          |   |         |          |          |   |         |          |          |   |          |         |          |   |          |          |         |   |          |          |         |   |          |          |          |
| C                                              | 3.49196                                                                                                                                                                                                                                                                                                                                                                                                                                                                                                                                                                                                                                                                                                                                                                                                                                                                                                                                                                                                                                                                                                                                                                                                                                                                                                                                                                                                                                                                                                                                                                                                                                                                                                                                                                                                                                                                                                                                                                            | -3.47707 | -1.77473 |          |         |   |          |          |         |   |          |          |         |   |          |         |          |   |          |         |          |   |          |         |          |   |          |          |          |   |          |         |          |   |          |          |         |   |          |         |          |   |          |          |          |   |         |         |         |   |         |         |         |   |          |         |          |   |         |         |          |   |         |          |          |   |         |         |          |   |         |          |          |   |         |          |          |   |         |          |          |   |         |          |          |   |         |          |          |   |          |         |          |   |          |          |         |   |          |          |         |   |          |          |          |
| H                                              | -0.39012                                                                                                                                                                                                                                                                                                                                                                                                                                                                                                                                                                                                                                                                                                                                                                                                                                                                                                                                                                                                                                                                                                                                                                                                                                                                                                                                                                                                                                                                                                                                                                                                                                                                                                                                                                                                                                                                                                                                                                           | 1.54532  | -1.05712 |          |         |   |          |          |         |   |          |          |         |   |          |         |          |   |          |         |          |   |          |         |          |   |          |          |          |   |          |         |          |   |          |          |         |   |          |         |          |   |          |          |          |   |         |         |         |   |         |         |         |   |          |         |          |   |         |         |          |   |         |          |          |   |         |         |          |   |         |          |          |   |         |          |          |   |         |          |          |   |         |          |          |   |         |          |          |   |          |         |          |   |          |          |         |   |          |          |         |   |          |          |          |
| O                                              | -1.02903                                                                                                                                                                                                                                                                                                                                                                                                                                                                                                                                                                                                                                                                                                                                                                                                                                                                                                                                                                                                                                                                                                                                                                                                                                                                                                                                                                                                                                                                                                                                                                                                                                                                                                                                                                                                                                                                                                                                                                           | -0.40627 | 1.26963  |          |         |   |          |          |         |   |          |          |         |   |          |         |          |   |          |         |          |   |          |         |          |   |          |          |          |   |          |         |          |   |          |          |         |   |          |         |          |   |          |          |          |   |         |         |         |   |         |         |         |   |          |         |          |   |         |         |          |   |         |          |          |   |         |         |          |   |         |          |          |   |         |          |          |   |         |          |          |   |         |          |          |   |         |          |          |   |          |         |          |   |          |          |         |   |          |          |         |   |          |          |          |
| C                                              | -0.85904                                                                                                                                                                                                                                                                                                                                                                                                                                                                                                                                                                                                                                                                                                                                                                                                                                                                                                                                                                                                                                                                                                                                                                                                                                                                                                                                                                                                                                                                                                                                                                                                                                                                                                                                                                                                                                                                                                                                                                           | -0.48769 | 2.68380  |          |         |   |          |          |         |   |          |          |         |   |          |         |          |   |          |         |          |   |          |         |          |   |          |          |          |   |          |         |          |   |          |          |         |   |          |         |          |   |          |          |          |   |         |         |         |   |         |         |         |   |          |         |          |   |         |         |          |   |         |          |          |   |         |         |          |   |         |          |          |   |         |          |          |   |         |          |          |   |         |          |          |   |         |          |          |   |          |         |          |   |          |          |         |   |          |          |         |   |          |          |          |
| C                                              | -1.52200                                                                                                                                                                                                                                                                                                                                                                                                                                                                                                                                                                                                                                                                                                                                                                                                                                                                                                                                                                                                                                                                                                                                                                                                                                                                                                                                                                                                                                                                                                                                                                                                                                                                                                                                                                                                                                                                                                                                                                           | -0.75867 | -2.89556 |          |         |   |          |          |         |   |          |          |         |   |          |         |          |   |          |         |          |   |          |         |          |   |          |          |          |   |          |         |          |   |          |          |         |   |          |         |          |   |          |          |          |   |         |         |         |   |         |         |         |   |          |         |          |   |         |         |          |   |         |          |          |   |         |         |          |   |         |          |          |   |         |          |          |   |         |          |          |   |         |          |          |   |         |          |          |   |          |         |          |   |          |          |         |   |          |          |         |   |          |          |          |

|   |          |          |          |
|---|----------|----------|----------|
| C | 5.03909  | -0.72986 | 1.22039  |
| O | 6.00733  | -1.48439 | 1.32367  |
| C | 5.19199  | 0.59587  | 0.45566  |
| N | 4.07096  | 1.50769  | 0.49203  |
| C | 4.02835  | 2.53716  | 1.38810  |
| O | 4.94450  | 2.79226  | 2.16903  |
| C | 2.74321  | 3.35017  | 1.34261  |
| N | 3.81178  | -0.98185 | 1.73626  |
| C | 3.50863  | -2.22467 | 2.41163  |
| H | 1.82972  | -4.43036 | -0.78591 |
| H | 4.10496  | -4.37460 | -1.79707 |
| H | 4.97017  | -2.24078 | -2.74377 |
| H | 3.56561  | -0.19443 | -2.67902 |
| H | 0.45750  | -2.38612 | -0.70160 |
| H | -0.71810 | -1.43363 | -3.20496 |
| H | -1.43250 | 0.17396  | -3.46178 |
| H | -2.47883 | -1.22416 | -3.15601 |
| H | 0.69830  | 0.18892  | -2.79325 |
| H | -1.59749 | -1.47783 | -0.88527 |
| H | -2.38340 | 2.15927  | -1.84964 |
| H | -6.17071 | 2.68249  | -1.53044 |
| H | -5.52504 | 3.26002  | 0.00782  |
| H | -4.71995 | 3.70412  | -1.50778 |
| H | -3.78948 | -1.33140 | 0.04790  |
| H | 2.58935  | 3.79051  | 0.35103  |
| H | 2.80078  | 4.14482  | 2.08876  |
| H | 1.88450  | 2.70210  | 1.54536  |
| H | 3.27198  | 1.35058  | -0.12965 |
| H | 6.06029  | 1.10366  | 0.88181  |
| H | 5.42713  | 0.33376  | -0.58210 |
| H | 3.03914  | -0.35847 | 1.51806  |
| H | 3.04045  | -2.03485 | 3.38576  |
| H | 2.83162  | -2.84739 | 1.81292  |
| H | -8.97287 | -1.95136 | 1.49992  |
| H | -1.82543 | -0.80959 | 3.07738  |
| H | -0.08074 | -1.21043 | 2.94929  |
| H | -7.94912 | -3.08939 | 2.42911  |
| H | -0.58371 | 0.48523  | 3.10288  |
| H | -8.26147 | -1.43242 | 3.02744  |
| H | 4.44786  | -2.76123 | 2.55933  |
| O | -0.27050 | 2.73362  | -1.50729 |
| H | 1.31128  | 2.03722  | -1.59234 |
| C | -0.52116 | 3.67081  | -0.50150 |
| H | -1.57755 | 4.00399  | -0.49062 |
| H | 0.09677  | 4.57663  | -0.63487 |
| H | -0.30731 | 3.28704  | 0.51397  |
| H | -6.14585 | 0.03096  | 0.50912  |

Optimized Molecular Properties for **T7-INT3**

|                                                |                                                                                                                                                                                                                                                                                                                                                                                                                                                                                                                                                                                                                                                                                                                                                                                                                                                                                                                                                                                                                                                                                                                                                                                                                                                                                                                                                                                                                                                                                                                                                                                                                                                                                                                                                                                                                                                                                                                                                                                                                                     |          |          |         |         |   |          |         |         |   |          |         |          |   |          |          |          |   |          |          |          |   |          |          |          |   |          |          |         |   |          |          |         |   |          |         |         |   |          |          |          |   |          |          |         |   |         |          |         |   |         |         |         |   |         |          |         |   |         |          |          |   |         |          |          |   |         |          |          |   |         |          |          |   |         |          |         |   |         |          |          |   |         |          |         |   |         |          |          |   |          |          |          |   |          |          |         |   |         |         |         |   |          |          |         |   |         |         |          |
|------------------------------------------------|-------------------------------------------------------------------------------------------------------------------------------------------------------------------------------------------------------------------------------------------------------------------------------------------------------------------------------------------------------------------------------------------------------------------------------------------------------------------------------------------------------------------------------------------------------------------------------------------------------------------------------------------------------------------------------------------------------------------------------------------------------------------------------------------------------------------------------------------------------------------------------------------------------------------------------------------------------------------------------------------------------------------------------------------------------------------------------------------------------------------------------------------------------------------------------------------------------------------------------------------------------------------------------------------------------------------------------------------------------------------------------------------------------------------------------------------------------------------------------------------------------------------------------------------------------------------------------------------------------------------------------------------------------------------------------------------------------------------------------------------------------------------------------------------------------------------------------------------------------------------------------------------------------------------------------------------------------------------------------------------------------------------------------------|----------|----------|---------|---------|---|----------|---------|---------|---|----------|---------|----------|---|----------|----------|----------|---|----------|----------|----------|---|----------|----------|----------|---|----------|----------|---------|---|----------|----------|---------|---|----------|---------|---------|---|----------|----------|----------|---|----------|----------|---------|---|---------|----------|---------|---|---------|---------|---------|---|---------|----------|---------|---|---------|----------|----------|---|---------|----------|----------|---|---------|----------|----------|---|---------|----------|----------|---|---------|----------|---------|---|---------|----------|----------|---|---------|----------|---------|---|---------|----------|----------|---|----------|----------|----------|---|----------|----------|---------|---|---------|---------|---------|---|----------|----------|---------|---|---------|---------|----------|
| Number of<br>(-)<br>Vibrational<br>Frequencies | 0                                                                                                                                                                                                                                                                                                                                                                                                                                                                                                                                                                                                                                                                                                                                                                                                                                                                                                                                                                                                                                                                                                                                                                                                                                                                                                                                                                                                                                                                                                                                                                                                                                                                                                                                                                                                                                                                                                                                                                                                                                   |          |          |         |         |   |          |         |         |   |          |         |          |   |          |          |          |   |          |          |          |   |          |          |          |   |          |          |         |   |          |          |         |   |          |         |         |   |          |          |          |   |          |          |         |   |         |          |         |   |         |         |         |   |         |          |         |   |         |          |          |   |         |          |          |   |         |          |          |   |         |          |          |   |         |          |         |   |         |          |          |   |         |          |         |   |         |          |          |   |          |          |          |   |          |          |         |   |         |         |         |   |          |          |         |   |         |         |          |
| Absolute<br>Energies<br>(Hartrees)             | <p><b>B3LYP/6-31G(d)</b></p> <p>There are 22 positive frequencies below 100 cm<sup>-1</sup>.</p> <p>Zero-point correction: 0.605309 hartree<br/>         Enthalpy correction: 0.649812 hartree<br/>         Free Energy correction: 0.520030 hartree<br/>         Quasiharmonic Free Energy correction: 0.535799 hartree</p> <p>SCF Energy: -1757.746841 hartree<br/>         SCF Energy + ZPVE: -1757.141532 hartree<br/>         Enthalpy: -1757.097029 hartree<br/>         Free Energy: -1757.226811 hartree</p> <p>Free Energy with quasiharmonic correction: -1757.211042 hartree<br/>         (correction: 9.90 kcal/mol)</p> <p><b>B3LYP-D3/6-311+G(d,p)</b></p> <p>SCF Done: E(RB3LYP) = -1758.39131062 A.U.</p>                                                                                                                                                                                                                                                                                                                                                                                                                                                                                                                                                                                                                                                                                                                                                                                                                                                                                                                                                                                                                                                                                                                                                                                                                                                                                                           |          |          |         |         |   |          |         |         |   |          |         |          |   |          |          |          |   |          |          |          |   |          |          |          |   |          |          |         |   |          |          |         |   |          |         |         |   |          |          |          |   |          |          |         |   |         |          |         |   |         |         |         |   |         |          |         |   |         |          |          |   |         |          |          |   |         |          |          |   |         |          |          |   |         |          |         |   |         |          |          |   |         |          |         |   |         |          |          |   |          |          |          |   |          |          |         |   |         |         |         |   |          |          |         |   |         |         |          |
| Cartesian<br>Coordinates                       | <p>73<br/>spD3-INT3-T7.out Energy: -1103407.1976214</p> <table> <tr><td>C</td><td>-4.97854</td><td>1.97009</td><td>0.85646</td></tr> <tr><td>O</td><td>-4.17083</td><td>1.64698</td><td>1.70993</td></tr> <tr><td>O</td><td>-5.35385</td><td>1.19859</td><td>-0.16596</td></tr> <tr><td>C</td><td>-3.87039</td><td>-2.21260</td><td>-0.96868</td></tr> <tr><td>C</td><td>-2.73493</td><td>-2.93238</td><td>-0.65545</td></tr> <tr><td>N</td><td>-3.92515</td><td>-1.10111</td><td>-0.15063</td></tr> <tr><td>C</td><td>-2.84865</td><td>-1.16336</td><td>0.62670</td></tr> <tr><td>N</td><td>-2.09731</td><td>-2.25551</td><td>0.36322</td></tr> <tr><td>C</td><td>-5.67379</td><td>3.31841</td><td>0.82976</td></tr> <tr><td>C</td><td>-4.94730</td><td>-2.52710</td><td>-1.96277</td></tr> <tr><td>C</td><td>-0.75654</td><td>-2.56359</td><td>1.05636</td></tr> <tr><td>C</td><td>0.59574</td><td>-0.54242</td><td>1.67528</td></tr> <tr><td>O</td><td>1.47534</td><td>0.33986</td><td>1.61314</td></tr> <tr><td>C</td><td>0.32446</td><td>-1.57455</td><td>0.76498</td></tr> <tr><td>C</td><td>1.08855</td><td>-1.61396</td><td>-0.52839</td></tr> <tr><td>C</td><td>2.60987</td><td>-1.78417</td><td>-0.42187</td></tr> <tr><td>O</td><td>0.87038</td><td>-0.47848</td><td>-1.41585</td></tr> <tr><td>C</td><td>3.44741</td><td>-1.40069</td><td>-1.47874</td></tr> <tr><td>C</td><td>3.19039</td><td>-2.41830</td><td>0.68290</td></tr> <tr><td>C</td><td>4.82144</td><td>-1.64308</td><td>-1.43148</td></tr> <tr><td>C</td><td>4.56240</td><td>-2.66849</td><td>0.73196</td></tr> <tr><td>C</td><td>5.38700</td><td>-2.28298</td><td>-0.32687</td></tr> <tr><td>H</td><td>-2.32272</td><td>-1.09065</td><td>-2.21695</td></tr> <tr><td>O</td><td>-0.25975</td><td>-0.53178</td><td>2.80166</td></tr> <tr><td>C</td><td>0.08009</td><td>0.41514</td><td>3.80155</td></tr> <tr><td>C</td><td>-0.42292</td><td>-4.03894</td><td>0.79025</td></tr> <tr><td>C</td><td>3.78756</td><td>2.60023</td><td>-0.66630</td></tr> </table> | C        | -4.97854 | 1.97009 | 0.85646 | O | -4.17083 | 1.64698 | 1.70993 | O | -5.35385 | 1.19859 | -0.16596 | C | -3.87039 | -2.21260 | -0.96868 | C | -2.73493 | -2.93238 | -0.65545 | N | -3.92515 | -1.10111 | -0.15063 | C | -2.84865 | -1.16336 | 0.62670 | N | -2.09731 | -2.25551 | 0.36322 | C | -5.67379 | 3.31841 | 0.82976 | C | -4.94730 | -2.52710 | -1.96277 | C | -0.75654 | -2.56359 | 1.05636 | C | 0.59574 | -0.54242 | 1.67528 | O | 1.47534 | 0.33986 | 1.61314 | C | 0.32446 | -1.57455 | 0.76498 | C | 1.08855 | -1.61396 | -0.52839 | C | 2.60987 | -1.78417 | -0.42187 | O | 0.87038 | -0.47848 | -1.41585 | C | 3.44741 | -1.40069 | -1.47874 | C | 3.19039 | -2.41830 | 0.68290 | C | 4.82144 | -1.64308 | -1.43148 | C | 4.56240 | -2.66849 | 0.73196 | C | 5.38700 | -2.28298 | -0.32687 | H | -2.32272 | -1.09065 | -2.21695 | O | -0.25975 | -0.53178 | 2.80166 | C | 0.08009 | 0.41514 | 3.80155 | C | -0.42292 | -4.03894 | 0.79025 | C | 3.78756 | 2.60023 | -0.66630 |
| C                                              | -4.97854                                                                                                                                                                                                                                                                                                                                                                                                                                                                                                                                                                                                                                                                                                                                                                                                                                                                                                                                                                                                                                                                                                                                                                                                                                                                                                                                                                                                                                                                                                                                                                                                                                                                                                                                                                                                                                                                                                                                                                                                                            | 1.97009  | 0.85646  |         |         |   |          |         |         |   |          |         |          |   |          |          |          |   |          |          |          |   |          |          |          |   |          |          |         |   |          |          |         |   |          |         |         |   |          |          |          |   |          |          |         |   |         |          |         |   |         |         |         |   |         |          |         |   |         |          |          |   |         |          |          |   |         |          |          |   |         |          |          |   |         |          |         |   |         |          |          |   |         |          |         |   |         |          |          |   |          |          |          |   |          |          |         |   |         |         |         |   |          |          |         |   |         |         |          |
| O                                              | -4.17083                                                                                                                                                                                                                                                                                                                                                                                                                                                                                                                                                                                                                                                                                                                                                                                                                                                                                                                                                                                                                                                                                                                                                                                                                                                                                                                                                                                                                                                                                                                                                                                                                                                                                                                                                                                                                                                                                                                                                                                                                            | 1.64698  | 1.70993  |         |         |   |          |         |         |   |          |         |          |   |          |          |          |   |          |          |          |   |          |          |          |   |          |          |         |   |          |          |         |   |          |         |         |   |          |          |          |   |          |          |         |   |         |          |         |   |         |         |         |   |         |          |         |   |         |          |          |   |         |          |          |   |         |          |          |   |         |          |          |   |         |          |         |   |         |          |          |   |         |          |         |   |         |          |          |   |          |          |          |   |          |          |         |   |         |         |         |   |          |          |         |   |         |         |          |
| O                                              | -5.35385                                                                                                                                                                                                                                                                                                                                                                                                                                                                                                                                                                                                                                                                                                                                                                                                                                                                                                                                                                                                                                                                                                                                                                                                                                                                                                                                                                                                                                                                                                                                                                                                                                                                                                                                                                                                                                                                                                                                                                                                                            | 1.19859  | -0.16596 |         |         |   |          |         |         |   |          |         |          |   |          |          |          |   |          |          |          |   |          |          |          |   |          |          |         |   |          |          |         |   |          |         |         |   |          |          |          |   |          |          |         |   |         |          |         |   |         |         |         |   |         |          |         |   |         |          |          |   |         |          |          |   |         |          |          |   |         |          |          |   |         |          |         |   |         |          |          |   |         |          |         |   |         |          |          |   |          |          |          |   |          |          |         |   |         |         |         |   |          |          |         |   |         |         |          |
| C                                              | -3.87039                                                                                                                                                                                                                                                                                                                                                                                                                                                                                                                                                                                                                                                                                                                                                                                                                                                                                                                                                                                                                                                                                                                                                                                                                                                                                                                                                                                                                                                                                                                                                                                                                                                                                                                                                                                                                                                                                                                                                                                                                            | -2.21260 | -0.96868 |         |         |   |          |         |         |   |          |         |          |   |          |          |          |   |          |          |          |   |          |          |          |   |          |          |         |   |          |          |         |   |          |         |         |   |          |          |          |   |          |          |         |   |         |          |         |   |         |         |         |   |         |          |         |   |         |          |          |   |         |          |          |   |         |          |          |   |         |          |          |   |         |          |         |   |         |          |          |   |         |          |         |   |         |          |          |   |          |          |          |   |          |          |         |   |         |         |         |   |          |          |         |   |         |         |          |
| C                                              | -2.73493                                                                                                                                                                                                                                                                                                                                                                                                                                                                                                                                                                                                                                                                                                                                                                                                                                                                                                                                                                                                                                                                                                                                                                                                                                                                                                                                                                                                                                                                                                                                                                                                                                                                                                                                                                                                                                                                                                                                                                                                                            | -2.93238 | -0.65545 |         |         |   |          |         |         |   |          |         |          |   |          |          |          |   |          |          |          |   |          |          |          |   |          |          |         |   |          |          |         |   |          |         |         |   |          |          |          |   |          |          |         |   |         |          |         |   |         |         |         |   |         |          |         |   |         |          |          |   |         |          |          |   |         |          |          |   |         |          |          |   |         |          |         |   |         |          |          |   |         |          |         |   |         |          |          |   |          |          |          |   |          |          |         |   |         |         |         |   |          |          |         |   |         |         |          |
| N                                              | -3.92515                                                                                                                                                                                                                                                                                                                                                                                                                                                                                                                                                                                                                                                                                                                                                                                                                                                                                                                                                                                                                                                                                                                                                                                                                                                                                                                                                                                                                                                                                                                                                                                                                                                                                                                                                                                                                                                                                                                                                                                                                            | -1.10111 | -0.15063 |         |         |   |          |         |         |   |          |         |          |   |          |          |          |   |          |          |          |   |          |          |          |   |          |          |         |   |          |          |         |   |          |         |         |   |          |          |          |   |          |          |         |   |         |          |         |   |         |         |         |   |         |          |         |   |         |          |          |   |         |          |          |   |         |          |          |   |         |          |          |   |         |          |         |   |         |          |          |   |         |          |         |   |         |          |          |   |          |          |          |   |          |          |         |   |         |         |         |   |          |          |         |   |         |         |          |
| C                                              | -2.84865                                                                                                                                                                                                                                                                                                                                                                                                                                                                                                                                                                                                                                                                                                                                                                                                                                                                                                                                                                                                                                                                                                                                                                                                                                                                                                                                                                                                                                                                                                                                                                                                                                                                                                                                                                                                                                                                                                                                                                                                                            | -1.16336 | 0.62670  |         |         |   |          |         |         |   |          |         |          |   |          |          |          |   |          |          |          |   |          |          |          |   |          |          |         |   |          |          |         |   |          |         |         |   |          |          |          |   |          |          |         |   |         |          |         |   |         |         |         |   |         |          |         |   |         |          |          |   |         |          |          |   |         |          |          |   |         |          |          |   |         |          |         |   |         |          |          |   |         |          |         |   |         |          |          |   |          |          |          |   |          |          |         |   |         |         |         |   |          |          |         |   |         |         |          |
| N                                              | -2.09731                                                                                                                                                                                                                                                                                                                                                                                                                                                                                                                                                                                                                                                                                                                                                                                                                                                                                                                                                                                                                                                                                                                                                                                                                                                                                                                                                                                                                                                                                                                                                                                                                                                                                                                                                                                                                                                                                                                                                                                                                            | -2.25551 | 0.36322  |         |         |   |          |         |         |   |          |         |          |   |          |          |          |   |          |          |          |   |          |          |          |   |          |          |         |   |          |          |         |   |          |         |         |   |          |          |          |   |          |          |         |   |         |          |         |   |         |         |         |   |         |          |         |   |         |          |          |   |         |          |          |   |         |          |          |   |         |          |          |   |         |          |         |   |         |          |          |   |         |          |         |   |         |          |          |   |          |          |          |   |          |          |         |   |         |         |         |   |          |          |         |   |         |         |          |
| C                                              | -5.67379                                                                                                                                                                                                                                                                                                                                                                                                                                                                                                                                                                                                                                                                                                                                                                                                                                                                                                                                                                                                                                                                                                                                                                                                                                                                                                                                                                                                                                                                                                                                                                                                                                                                                                                                                                                                                                                                                                                                                                                                                            | 3.31841  | 0.82976  |         |         |   |          |         |         |   |          |         |          |   |          |          |          |   |          |          |          |   |          |          |          |   |          |          |         |   |          |          |         |   |          |         |         |   |          |          |          |   |          |          |         |   |         |          |         |   |         |         |         |   |         |          |         |   |         |          |          |   |         |          |          |   |         |          |          |   |         |          |          |   |         |          |         |   |         |          |          |   |         |          |         |   |         |          |          |   |          |          |          |   |          |          |         |   |         |         |         |   |          |          |         |   |         |         |          |
| C                                              | -4.94730                                                                                                                                                                                                                                                                                                                                                                                                                                                                                                                                                                                                                                                                                                                                                                                                                                                                                                                                                                                                                                                                                                                                                                                                                                                                                                                                                                                                                                                                                                                                                                                                                                                                                                                                                                                                                                                                                                                                                                                                                            | -2.52710 | -1.96277 |         |         |   |          |         |         |   |          |         |          |   |          |          |          |   |          |          |          |   |          |          |          |   |          |          |         |   |          |          |         |   |          |         |         |   |          |          |          |   |          |          |         |   |         |          |         |   |         |         |         |   |         |          |         |   |         |          |          |   |         |          |          |   |         |          |          |   |         |          |          |   |         |          |         |   |         |          |          |   |         |          |         |   |         |          |          |   |          |          |          |   |          |          |         |   |         |         |         |   |          |          |         |   |         |         |          |
| C                                              | -0.75654                                                                                                                                                                                                                                                                                                                                                                                                                                                                                                                                                                                                                                                                                                                                                                                                                                                                                                                                                                                                                                                                                                                                                                                                                                                                                                                                                                                                                                                                                                                                                                                                                                                                                                                                                                                                                                                                                                                                                                                                                            | -2.56359 | 1.05636  |         |         |   |          |         |         |   |          |         |          |   |          |          |          |   |          |          |          |   |          |          |          |   |          |          |         |   |          |          |         |   |          |         |         |   |          |          |          |   |          |          |         |   |         |          |         |   |         |         |         |   |         |          |         |   |         |          |          |   |         |          |          |   |         |          |          |   |         |          |          |   |         |          |         |   |         |          |          |   |         |          |         |   |         |          |          |   |          |          |          |   |          |          |         |   |         |         |         |   |          |          |         |   |         |         |          |
| C                                              | 0.59574                                                                                                                                                                                                                                                                                                                                                                                                                                                                                                                                                                                                                                                                                                                                                                                                                                                                                                                                                                                                                                                                                                                                                                                                                                                                                                                                                                                                                                                                                                                                                                                                                                                                                                                                                                                                                                                                                                                                                                                                                             | -0.54242 | 1.67528  |         |         |   |          |         |         |   |          |         |          |   |          |          |          |   |          |          |          |   |          |          |          |   |          |          |         |   |          |          |         |   |          |         |         |   |          |          |          |   |          |          |         |   |         |          |         |   |         |         |         |   |         |          |         |   |         |          |          |   |         |          |          |   |         |          |          |   |         |          |          |   |         |          |         |   |         |          |          |   |         |          |         |   |         |          |          |   |          |          |          |   |          |          |         |   |         |         |         |   |          |          |         |   |         |         |          |
| O                                              | 1.47534                                                                                                                                                                                                                                                                                                                                                                                                                                                                                                                                                                                                                                                                                                                                                                                                                                                                                                                                                                                                                                                                                                                                                                                                                                                                                                                                                                                                                                                                                                                                                                                                                                                                                                                                                                                                                                                                                                                                                                                                                             | 0.33986  | 1.61314  |         |         |   |          |         |         |   |          |         |          |   |          |          |          |   |          |          |          |   |          |          |          |   |          |          |         |   |          |          |         |   |          |         |         |   |          |          |          |   |          |          |         |   |         |          |         |   |         |         |         |   |         |          |         |   |         |          |          |   |         |          |          |   |         |          |          |   |         |          |          |   |         |          |         |   |         |          |          |   |         |          |         |   |         |          |          |   |          |          |          |   |          |          |         |   |         |         |         |   |          |          |         |   |         |         |          |
| C                                              | 0.32446                                                                                                                                                                                                                                                                                                                                                                                                                                                                                                                                                                                                                                                                                                                                                                                                                                                                                                                                                                                                                                                                                                                                                                                                                                                                                                                                                                                                                                                                                                                                                                                                                                                                                                                                                                                                                                                                                                                                                                                                                             | -1.57455 | 0.76498  |         |         |   |          |         |         |   |          |         |          |   |          |          |          |   |          |          |          |   |          |          |          |   |          |          |         |   |          |          |         |   |          |         |         |   |          |          |          |   |          |          |         |   |         |          |         |   |         |         |         |   |         |          |         |   |         |          |          |   |         |          |          |   |         |          |          |   |         |          |          |   |         |          |         |   |         |          |          |   |         |          |         |   |         |          |          |   |          |          |          |   |          |          |         |   |         |         |         |   |          |          |         |   |         |         |          |
| C                                              | 1.08855                                                                                                                                                                                                                                                                                                                                                                                                                                                                                                                                                                                                                                                                                                                                                                                                                                                                                                                                                                                                                                                                                                                                                                                                                                                                                                                                                                                                                                                                                                                                                                                                                                                                                                                                                                                                                                                                                                                                                                                                                             | -1.61396 | -0.52839 |         |         |   |          |         |         |   |          |         |          |   |          |          |          |   |          |          |          |   |          |          |          |   |          |          |         |   |          |          |         |   |          |         |         |   |          |          |          |   |          |          |         |   |         |          |         |   |         |         |         |   |         |          |         |   |         |          |          |   |         |          |          |   |         |          |          |   |         |          |          |   |         |          |         |   |         |          |          |   |         |          |         |   |         |          |          |   |          |          |          |   |          |          |         |   |         |         |         |   |          |          |         |   |         |         |          |
| C                                              | 2.60987                                                                                                                                                                                                                                                                                                                                                                                                                                                                                                                                                                                                                                                                                                                                                                                                                                                                                                                                                                                                                                                                                                                                                                                                                                                                                                                                                                                                                                                                                                                                                                                                                                                                                                                                                                                                                                                                                                                                                                                                                             | -1.78417 | -0.42187 |         |         |   |          |         |         |   |          |         |          |   |          |          |          |   |          |          |          |   |          |          |          |   |          |          |         |   |          |          |         |   |          |         |         |   |          |          |          |   |          |          |         |   |         |          |         |   |         |         |         |   |         |          |         |   |         |          |          |   |         |          |          |   |         |          |          |   |         |          |          |   |         |          |         |   |         |          |          |   |         |          |         |   |         |          |          |   |          |          |          |   |          |          |         |   |         |         |         |   |          |          |         |   |         |         |          |
| O                                              | 0.87038                                                                                                                                                                                                                                                                                                                                                                                                                                                                                                                                                                                                                                                                                                                                                                                                                                                                                                                                                                                                                                                                                                                                                                                                                                                                                                                                                                                                                                                                                                                                                                                                                                                                                                                                                                                                                                                                                                                                                                                                                             | -0.47848 | -1.41585 |         |         |   |          |         |         |   |          |         |          |   |          |          |          |   |          |          |          |   |          |          |          |   |          |          |         |   |          |          |         |   |          |         |         |   |          |          |          |   |          |          |         |   |         |          |         |   |         |         |         |   |         |          |         |   |         |          |          |   |         |          |          |   |         |          |          |   |         |          |          |   |         |          |         |   |         |          |          |   |         |          |         |   |         |          |          |   |          |          |          |   |          |          |         |   |         |         |         |   |          |          |         |   |         |         |          |
| C                                              | 3.44741                                                                                                                                                                                                                                                                                                                                                                                                                                                                                                                                                                                                                                                                                                                                                                                                                                                                                                                                                                                                                                                                                                                                                                                                                                                                                                                                                                                                                                                                                                                                                                                                                                                                                                                                                                                                                                                                                                                                                                                                                             | -1.40069 | -1.47874 |         |         |   |          |         |         |   |          |         |          |   |          |          |          |   |          |          |          |   |          |          |          |   |          |          |         |   |          |          |         |   |          |         |         |   |          |          |          |   |          |          |         |   |         |          |         |   |         |         |         |   |         |          |         |   |         |          |          |   |         |          |          |   |         |          |          |   |         |          |          |   |         |          |         |   |         |          |          |   |         |          |         |   |         |          |          |   |          |          |          |   |          |          |         |   |         |         |         |   |          |          |         |   |         |         |          |
| C                                              | 3.19039                                                                                                                                                                                                                                                                                                                                                                                                                                                                                                                                                                                                                                                                                                                                                                                                                                                                                                                                                                                                                                                                                                                                                                                                                                                                                                                                                                                                                                                                                                                                                                                                                                                                                                                                                                                                                                                                                                                                                                                                                             | -2.41830 | 0.68290  |         |         |   |          |         |         |   |          |         |          |   |          |          |          |   |          |          |          |   |          |          |          |   |          |          |         |   |          |          |         |   |          |         |         |   |          |          |          |   |          |          |         |   |         |          |         |   |         |         |         |   |         |          |         |   |         |          |          |   |         |          |          |   |         |          |          |   |         |          |          |   |         |          |         |   |         |          |          |   |         |          |         |   |         |          |          |   |          |          |          |   |          |          |         |   |         |         |         |   |          |          |         |   |         |         |          |
| C                                              | 4.82144                                                                                                                                                                                                                                                                                                                                                                                                                                                                                                                                                                                                                                                                                                                                                                                                                                                                                                                                                                                                                                                                                                                                                                                                                                                                                                                                                                                                                                                                                                                                                                                                                                                                                                                                                                                                                                                                                                                                                                                                                             | -1.64308 | -1.43148 |         |         |   |          |         |         |   |          |         |          |   |          |          |          |   |          |          |          |   |          |          |          |   |          |          |         |   |          |          |         |   |          |         |         |   |          |          |          |   |          |          |         |   |         |          |         |   |         |         |         |   |         |          |         |   |         |          |          |   |         |          |          |   |         |          |          |   |         |          |          |   |         |          |         |   |         |          |          |   |         |          |         |   |         |          |          |   |          |          |          |   |          |          |         |   |         |         |         |   |          |          |         |   |         |         |          |
| C                                              | 4.56240                                                                                                                                                                                                                                                                                                                                                                                                                                                                                                                                                                                                                                                                                                                                                                                                                                                                                                                                                                                                                                                                                                                                                                                                                                                                                                                                                                                                                                                                                                                                                                                                                                                                                                                                                                                                                                                                                                                                                                                                                             | -2.66849 | 0.73196  |         |         |   |          |         |         |   |          |         |          |   |          |          |          |   |          |          |          |   |          |          |          |   |          |          |         |   |          |          |         |   |          |         |         |   |          |          |          |   |          |          |         |   |         |          |         |   |         |         |         |   |         |          |         |   |         |          |          |   |         |          |          |   |         |          |          |   |         |          |          |   |         |          |         |   |         |          |          |   |         |          |         |   |         |          |          |   |          |          |          |   |          |          |         |   |         |         |         |   |          |          |         |   |         |         |          |
| C                                              | 5.38700                                                                                                                                                                                                                                                                                                                                                                                                                                                                                                                                                                                                                                                                                                                                                                                                                                                                                                                                                                                                                                                                                                                                                                                                                                                                                                                                                                                                                                                                                                                                                                                                                                                                                                                                                                                                                                                                                                                                                                                                                             | -2.28298 | -0.32687 |         |         |   |          |         |         |   |          |         |          |   |          |          |          |   |          |          |          |   |          |          |          |   |          |          |         |   |          |          |         |   |          |         |         |   |          |          |          |   |          |          |         |   |         |          |         |   |         |         |         |   |         |          |         |   |         |          |          |   |         |          |          |   |         |          |          |   |         |          |          |   |         |          |         |   |         |          |          |   |         |          |         |   |         |          |          |   |          |          |          |   |          |          |         |   |         |         |         |   |          |          |         |   |         |         |          |
| H                                              | -2.32272                                                                                                                                                                                                                                                                                                                                                                                                                                                                                                                                                                                                                                                                                                                                                                                                                                                                                                                                                                                                                                                                                                                                                                                                                                                                                                                                                                                                                                                                                                                                                                                                                                                                                                                                                                                                                                                                                                                                                                                                                            | -1.09065 | -2.21695 |         |         |   |          |         |         |   |          |         |          |   |          |          |          |   |          |          |          |   |          |          |          |   |          |          |         |   |          |          |         |   |          |         |         |   |          |          |          |   |          |          |         |   |         |          |         |   |         |         |         |   |         |          |         |   |         |          |          |   |         |          |          |   |         |          |          |   |         |          |          |   |         |          |         |   |         |          |          |   |         |          |         |   |         |          |          |   |          |          |          |   |          |          |         |   |         |         |         |   |          |          |         |   |         |         |          |
| O                                              | -0.25975                                                                                                                                                                                                                                                                                                                                                                                                                                                                                                                                                                                                                                                                                                                                                                                                                                                                                                                                                                                                                                                                                                                                                                                                                                                                                                                                                                                                                                                                                                                                                                                                                                                                                                                                                                                                                                                                                                                                                                                                                            | -0.53178 | 2.80166  |         |         |   |          |         |         |   |          |         |          |   |          |          |          |   |          |          |          |   |          |          |          |   |          |          |         |   |          |          |         |   |          |         |         |   |          |          |          |   |          |          |         |   |         |          |         |   |         |         |         |   |         |          |         |   |         |          |          |   |         |          |          |   |         |          |          |   |         |          |          |   |         |          |         |   |         |          |          |   |         |          |         |   |         |          |          |   |          |          |          |   |          |          |         |   |         |         |         |   |          |          |         |   |         |         |          |
| C                                              | 0.08009                                                                                                                                                                                                                                                                                                                                                                                                                                                                                                                                                                                                                                                                                                                                                                                                                                                                                                                                                                                                                                                                                                                                                                                                                                                                                                                                                                                                                                                                                                                                                                                                                                                                                                                                                                                                                                                                                                                                                                                                                             | 0.41514  | 3.80155  |         |         |   |          |         |         |   |          |         |          |   |          |          |          |   |          |          |          |   |          |          |          |   |          |          |         |   |          |          |         |   |          |         |         |   |          |          |          |   |          |          |         |   |         |          |         |   |         |         |         |   |         |          |         |   |         |          |          |   |         |          |          |   |         |          |          |   |         |          |          |   |         |          |         |   |         |          |          |   |         |          |         |   |         |          |          |   |          |          |          |   |          |          |         |   |         |         |         |   |          |          |         |   |         |         |          |
| C                                              | -0.42292                                                                                                                                                                                                                                                                                                                                                                                                                                                                                                                                                                                                                                                                                                                                                                                                                                                                                                                                                                                                                                                                                                                                                                                                                                                                                                                                                                                                                                                                                                                                                                                                                                                                                                                                                                                                                                                                                                                                                                                                                            | -4.03894 | 0.79025  |         |         |   |          |         |         |   |          |         |          |   |          |          |          |   |          |          |          |   |          |          |          |   |          |          |         |   |          |          |         |   |          |         |         |   |          |          |          |   |          |          |         |   |         |          |         |   |         |         |         |   |         |          |         |   |         |          |          |   |         |          |          |   |         |          |          |   |         |          |          |   |         |          |         |   |         |          |          |   |         |          |         |   |         |          |          |   |          |          |          |   |          |          |         |   |         |         |         |   |          |          |         |   |         |         |          |
| C                                              | 3.78756                                                                                                                                                                                                                                                                                                                                                                                                                                                                                                                                                                                                                                                                                                                                                                                                                                                                                                                                                                                                                                                                                                                                                                                                                                                                                                                                                                                                                                                                                                                                                                                                                                                                                                                                                                                                                                                                                                                                                                                                                             | 2.60023  | -0.66630 |         |         |   |          |         |         |   |          |         |          |   |          |          |          |   |          |          |          |   |          |          |          |   |          |          |         |   |          |          |         |   |          |         |         |   |          |          |          |   |          |          |         |   |         |          |         |   |         |         |         |   |         |          |         |   |         |          |          |   |         |          |          |   |         |          |          |   |         |          |          |   |         |          |         |   |         |          |          |   |         |          |         |   |         |          |          |   |          |          |          |   |          |          |         |   |         |         |         |   |          |          |         |   |         |         |          |

|   |          |          |          |
|---|----------|----------|----------|
| O | 4.88097  | 3.03291  | -1.04165 |
| C | 2.52894  | 2.91352  | -1.49280 |
| N | 1.27556  | 2.38686  | -0.99919 |
| C | 0.34754  | 3.19334  | -0.40775 |
| O | 0.44964  | 4.41967  | -0.35097 |
| C | -0.84217 | 2.46467  | 0.19723  |
| N | 3.61696  | 1.85415  | 0.44324  |
| C | 4.75438  | 1.45053  | 1.24440  |
| H | 4.98977  | -3.15715 | 1.60564  |
| H | 6.45788  | -2.47138 | -0.28851 |
| H | 5.45225  | -1.32505 | -2.25886 |
| H | 3.00880  | -0.89985 | -2.33467 |
| H | 2.54836  | -2.69581 | 1.51354  |
| H | 0.44087  | -4.31111 | 1.40272  |
| H | -0.15317 | -4.23196 | -0.25404 |
| H | -1.25742 | -4.70104 | 1.05515  |
| H | 0.74283  | -2.50044 | -1.08771 |
| H | -1.00978 | -2.47062 | 2.11276  |
| H | -2.35274 | -3.85581 | -1.06153 |
| H | -5.89502 | -2.76670 | -1.46318 |
| H | -5.14306 | -1.67810 | -2.62911 |
| H | -4.66790 | -3.38596 | -2.58216 |
| H | -2.58192 | -0.43019 | 1.37447  |
| H | -0.72020 | 2.43335  | 1.28452  |
| H | -0.93941 | 1.43481  | -0.15402 |
| H | -1.75611 | 3.02519  | -0.01707 |
| H | 1.14221  | 1.37118  | -0.99236 |
| H | 2.43226  | 4.00095  | -1.54145 |
| H | 2.72535  | 2.55030  | -2.50941 |
| H | 2.71667  | 1.43202  | 0.67395  |
| H | 5.23954  | 2.31760  | 1.71093  |
| H | 4.39277  | 0.77267  | 2.01993  |
| H | -5.37236 | 3.87133  | -0.06694 |
| H | -0.69383 | 0.32792  | 4.57046  |
| H | 1.06373  | 0.20633  | 4.24143  |
| H | -6.75979 | 3.18523  | 0.78061  |
| H | 0.09860  | 1.43645  | 3.40837  |
| H | -5.40387 | 3.89095  | 1.71826  |
| H | 5.50387  | 0.93368  | 0.63400  |
| O | -1.68999 | -0.48801 | -2.64594 |
| H | -0.05215 | -0.52513 | -1.74296 |
| C | -2.32997 | 0.76810  | -2.85820 |
| H | -2.98080 | 0.73962  | -3.74560 |
| H | -1.54162 | 1.50624  | -3.02678 |
| H | -2.92650 | 1.07891  | -1.99287 |
| H | -4.85443 | 0.30904  | -0.12324 |

Optimized Molecular Properties for **T7-TS4**

|                                                |                                                                                                                                                                                                                                                                                                                                                                                                                                                                                                                                                                                                                                                                                                                                                                                                                                                                                                                                                                                                                                                                                                                                                                                                                                                                                                                                                                                                                                                                                                                                                                                                                                                                                                                                                                                                                                                                                                                                                                                                                                              |          |          |         |         |   |          |         |         |   |          |         |          |   |          |          |          |   |          |          |          |   |          |          |          |   |          |          |         |   |          |          |         |   |          |         |         |   |          |          |          |   |          |          |         |   |         |          |         |   |         |         |         |   |         |          |         |   |         |          |          |   |         |          |          |   |         |          |          |   |         |          |          |   |         |          |         |   |         |          |          |   |         |          |         |   |         |          |          |   |          |          |          |   |          |          |         |   |          |         |         |   |          |          |         |   |         |         |          |
|------------------------------------------------|----------------------------------------------------------------------------------------------------------------------------------------------------------------------------------------------------------------------------------------------------------------------------------------------------------------------------------------------------------------------------------------------------------------------------------------------------------------------------------------------------------------------------------------------------------------------------------------------------------------------------------------------------------------------------------------------------------------------------------------------------------------------------------------------------------------------------------------------------------------------------------------------------------------------------------------------------------------------------------------------------------------------------------------------------------------------------------------------------------------------------------------------------------------------------------------------------------------------------------------------------------------------------------------------------------------------------------------------------------------------------------------------------------------------------------------------------------------------------------------------------------------------------------------------------------------------------------------------------------------------------------------------------------------------------------------------------------------------------------------------------------------------------------------------------------------------------------------------------------------------------------------------------------------------------------------------------------------------------------------------------------------------------------------------|----------|----------|---------|---------|---|----------|---------|---------|---|----------|---------|----------|---|----------|----------|----------|---|----------|----------|----------|---|----------|----------|----------|---|----------|----------|---------|---|----------|----------|---------|---|----------|---------|---------|---|----------|----------|----------|---|----------|----------|---------|---|---------|----------|---------|---|---------|---------|---------|---|---------|----------|---------|---|---------|----------|----------|---|---------|----------|----------|---|---------|----------|----------|---|---------|----------|----------|---|---------|----------|---------|---|---------|----------|----------|---|---------|----------|---------|---|---------|----------|----------|---|----------|----------|----------|---|----------|----------|---------|---|----------|---------|---------|---|----------|----------|---------|---|---------|---------|----------|
| Number of<br>(-)<br>Vibrational<br>Frequencies | 1 (-232.2431)                                                                                                                                                                                                                                                                                                                                                                                                                                                                                                                                                                                                                                                                                                                                                                                                                                                                                                                                                                                                                                                                                                                                                                                                                                                                                                                                                                                                                                                                                                                                                                                                                                                                                                                                                                                                                                                                                                                                                                                                                                |          |          |         |         |   |          |         |         |   |          |         |          |   |          |          |          |   |          |          |          |   |          |          |          |   |          |          |         |   |          |          |         |   |          |         |         |   |          |          |          |   |          |          |         |   |         |          |         |   |         |         |         |   |         |          |         |   |         |          |          |   |         |          |          |   |         |          |          |   |         |          |          |   |         |          |         |   |         |          |          |   |         |          |         |   |         |          |          |   |          |          |          |   |          |          |         |   |          |         |         |   |          |          |         |   |         |         |          |
| Absolute<br>Energies<br>(Hartrees)             | <p><b>B3LYP/6-31G(d)</b></p> <p>There are 21 positive frequencies below 100 cm<sup>-1</sup>.</p> <p>Zero-point correction: 0.603601 hartree<br/>         Enthalpy correction: 0.647795 hartree<br/>         Free Energy correction: 0.519753 hartree<br/>         Quasiharmonic Free Energy correction: 0.533962 hartree</p> <p>SCF Energy: -1757.739971 hartree<br/>         SCF Energy + ZPVE: -1757.136370 hartree<br/>         Enthalpy: -1757.092175 hartree<br/>         Free Energy: -1757.220217 hartree</p> <p>Free Energy with quasiharmonic correction: -1757.206009 hartree<br/>         (correction: 8.92 kcal/mol)</p> <p><b>B3LYP-D3/6-311+G(d,p)</b></p> <p>SCF Done: E(RB3LYP) = -1758.38389107 A.U.</p>                                                                                                                                                                                                                                                                                                                                                                                                                                                                                                                                                                                                                                                                                                                                                                                                                                                                                                                                                                                                                                                                                                                                                                                                                                                                                                                    |          |          |         |         |   |          |         |         |   |          |         |          |   |          |          |          |   |          |          |          |   |          |          |          |   |          |          |         |   |          |          |         |   |          |         |         |   |          |          |          |   |          |          |         |   |         |          |         |   |         |         |         |   |         |          |         |   |         |          |          |   |         |          |          |   |         |          |          |   |         |          |          |   |         |          |         |   |         |          |          |   |         |          |         |   |         |          |          |   |          |          |          |   |          |          |         |   |          |         |         |   |          |          |         |   |         |         |          |
| Cartesian<br>Coordinates                       | <p>73<br/>         spD3-TS4-T7.out Energy: -1103402.5417835</p> <table> <tr><td>C</td><td>-4.64523</td><td>2.27728</td><td>0.93750</td></tr> <tr><td>O</td><td>-3.80177</td><td>1.90761</td><td>1.73931</td></tr> <tr><td>O</td><td>-5.19400</td><td>1.51545</td><td>-0.00276</td></tr> <tr><td>C</td><td>-4.22042</td><td>-2.01647</td><td>-0.83325</td></tr> <tr><td>C</td><td>-3.16039</td><td>-2.86960</td><td>-0.56860</td></tr> <tr><td>N</td><td>-4.08306</td><td>-0.90241</td><td>-0.03496</td></tr> <tr><td>C</td><td>-2.96661</td><td>-1.11055</td><td>0.67668</td></tr> <tr><td>N</td><td>-2.37393</td><td>-2.28183</td><td>0.39828</td></tr> <tr><td>C</td><td>-5.18385</td><td>3.69785</td><td>0.90105</td></tr> <tr><td>C</td><td>-5.38262</td><td>-2.19952</td><td>-1.76296</td></tr> <tr><td>C</td><td>-0.63452</td><td>-2.71266</td><td>1.07698</td></tr> <tr><td>C</td><td>0.54228</td><td>-0.62419</td><td>1.66188</td></tr> <tr><td>O</td><td>1.37340</td><td>0.28282</td><td>1.54171</td></tr> <tr><td>C</td><td>0.33754</td><td>-1.73043</td><td>0.77416</td></tr> <tr><td>C</td><td>1.10555</td><td>-1.72293</td><td>-0.52812</td></tr> <tr><td>C</td><td>2.62702</td><td>-1.83008</td><td>-0.39814</td></tr> <tr><td>O</td><td>0.82078</td><td>-0.59008</td><td>-1.37824</td></tr> <tr><td>C</td><td>3.46870</td><td>-1.31513</td><td>-1.39253</td></tr> <tr><td>C</td><td>3.20910</td><td>-2.53571</td><td>0.66238</td></tr> <tr><td>C</td><td>4.85201</td><td>-1.49064</td><td>-1.32328</td></tr> <tr><td>C</td><td>4.59026</td><td>-2.72171</td><td>0.73037</td></tr> <tr><td>C</td><td>5.42076</td><td>-2.19866</td><td>-0.26295</td></tr> <tr><td>H</td><td>-2.32082</td><td>-1.40186</td><td>-2.07712</td></tr> <tr><td>O</td><td>-0.29333</td><td>-0.62500</td><td>2.76931</td></tr> <tr><td>C</td><td>-0.10869</td><td>0.46446</td><td>3.66802</td></tr> <tr><td>C</td><td>-0.53154</td><td>-4.13358</td><td>0.55594</td></tr> <tr><td>C</td><td>3.89403</td><td>2.48717</td><td>-0.60563</td></tr> </table> | C        | -4.64523 | 2.27728 | 0.93750 | O | -3.80177 | 1.90761 | 1.73931 | O | -5.19400 | 1.51545 | -0.00276 | C | -4.22042 | -2.01647 | -0.83325 | C | -3.16039 | -2.86960 | -0.56860 | N | -4.08306 | -0.90241 | -0.03496 | C | -2.96661 | -1.11055 | 0.67668 | N | -2.37393 | -2.28183 | 0.39828 | C | -5.18385 | 3.69785 | 0.90105 | C | -5.38262 | -2.19952 | -1.76296 | C | -0.63452 | -2.71266 | 1.07698 | C | 0.54228 | -0.62419 | 1.66188 | O | 1.37340 | 0.28282 | 1.54171 | C | 0.33754 | -1.73043 | 0.77416 | C | 1.10555 | -1.72293 | -0.52812 | C | 2.62702 | -1.83008 | -0.39814 | O | 0.82078 | -0.59008 | -1.37824 | C | 3.46870 | -1.31513 | -1.39253 | C | 3.20910 | -2.53571 | 0.66238 | C | 4.85201 | -1.49064 | -1.32328 | C | 4.59026 | -2.72171 | 0.73037 | C | 5.42076 | -2.19866 | -0.26295 | H | -2.32082 | -1.40186 | -2.07712 | O | -0.29333 | -0.62500 | 2.76931 | C | -0.10869 | 0.46446 | 3.66802 | C | -0.53154 | -4.13358 | 0.55594 | C | 3.89403 | 2.48717 | -0.60563 |
| C                                              | -4.64523                                                                                                                                                                                                                                                                                                                                                                                                                                                                                                                                                                                                                                                                                                                                                                                                                                                                                                                                                                                                                                                                                                                                                                                                                                                                                                                                                                                                                                                                                                                                                                                                                                                                                                                                                                                                                                                                                                                                                                                                                                     | 2.27728  | 0.93750  |         |         |   |          |         |         |   |          |         |          |   |          |          |          |   |          |          |          |   |          |          |          |   |          |          |         |   |          |          |         |   |          |         |         |   |          |          |          |   |          |          |         |   |         |          |         |   |         |         |         |   |         |          |         |   |         |          |          |   |         |          |          |   |         |          |          |   |         |          |          |   |         |          |         |   |         |          |          |   |         |          |         |   |         |          |          |   |          |          |          |   |          |          |         |   |          |         |         |   |          |          |         |   |         |         |          |
| O                                              | -3.80177                                                                                                                                                                                                                                                                                                                                                                                                                                                                                                                                                                                                                                                                                                                                                                                                                                                                                                                                                                                                                                                                                                                                                                                                                                                                                                                                                                                                                                                                                                                                                                                                                                                                                                                                                                                                                                                                                                                                                                                                                                     | 1.90761  | 1.73931  |         |         |   |          |         |         |   |          |         |          |   |          |          |          |   |          |          |          |   |          |          |          |   |          |          |         |   |          |          |         |   |          |         |         |   |          |          |          |   |          |          |         |   |         |          |         |   |         |         |         |   |         |          |         |   |         |          |          |   |         |          |          |   |         |          |          |   |         |          |          |   |         |          |         |   |         |          |          |   |         |          |         |   |         |          |          |   |          |          |          |   |          |          |         |   |          |         |         |   |          |          |         |   |         |         |          |
| O                                              | -5.19400                                                                                                                                                                                                                                                                                                                                                                                                                                                                                                                                                                                                                                                                                                                                                                                                                                                                                                                                                                                                                                                                                                                                                                                                                                                                                                                                                                                                                                                                                                                                                                                                                                                                                                                                                                                                                                                                                                                                                                                                                                     | 1.51545  | -0.00276 |         |         |   |          |         |         |   |          |         |          |   |          |          |          |   |          |          |          |   |          |          |          |   |          |          |         |   |          |          |         |   |          |         |         |   |          |          |          |   |          |          |         |   |         |          |         |   |         |         |         |   |         |          |         |   |         |          |          |   |         |          |          |   |         |          |          |   |         |          |          |   |         |          |         |   |         |          |          |   |         |          |         |   |         |          |          |   |          |          |          |   |          |          |         |   |          |         |         |   |          |          |         |   |         |         |          |
| C                                              | -4.22042                                                                                                                                                                                                                                                                                                                                                                                                                                                                                                                                                                                                                                                                                                                                                                                                                                                                                                                                                                                                                                                                                                                                                                                                                                                                                                                                                                                                                                                                                                                                                                                                                                                                                                                                                                                                                                                                                                                                                                                                                                     | -2.01647 | -0.83325 |         |         |   |          |         |         |   |          |         |          |   |          |          |          |   |          |          |          |   |          |          |          |   |          |          |         |   |          |          |         |   |          |         |         |   |          |          |          |   |          |          |         |   |         |          |         |   |         |         |         |   |         |          |         |   |         |          |          |   |         |          |          |   |         |          |          |   |         |          |          |   |         |          |         |   |         |          |          |   |         |          |         |   |         |          |          |   |          |          |          |   |          |          |         |   |          |         |         |   |          |          |         |   |         |         |          |
| C                                              | -3.16039                                                                                                                                                                                                                                                                                                                                                                                                                                                                                                                                                                                                                                                                                                                                                                                                                                                                                                                                                                                                                                                                                                                                                                                                                                                                                                                                                                                                                                                                                                                                                                                                                                                                                                                                                                                                                                                                                                                                                                                                                                     | -2.86960 | -0.56860 |         |         |   |          |         |         |   |          |         |          |   |          |          |          |   |          |          |          |   |          |          |          |   |          |          |         |   |          |          |         |   |          |         |         |   |          |          |          |   |          |          |         |   |         |          |         |   |         |         |         |   |         |          |         |   |         |          |          |   |         |          |          |   |         |          |          |   |         |          |          |   |         |          |         |   |         |          |          |   |         |          |         |   |         |          |          |   |          |          |          |   |          |          |         |   |          |         |         |   |          |          |         |   |         |         |          |
| N                                              | -4.08306                                                                                                                                                                                                                                                                                                                                                                                                                                                                                                                                                                                                                                                                                                                                                                                                                                                                                                                                                                                                                                                                                                                                                                                                                                                                                                                                                                                                                                                                                                                                                                                                                                                                                                                                                                                                                                                                                                                                                                                                                                     | -0.90241 | -0.03496 |         |         |   |          |         |         |   |          |         |          |   |          |          |          |   |          |          |          |   |          |          |          |   |          |          |         |   |          |          |         |   |          |         |         |   |          |          |          |   |          |          |         |   |         |          |         |   |         |         |         |   |         |          |         |   |         |          |          |   |         |          |          |   |         |          |          |   |         |          |          |   |         |          |         |   |         |          |          |   |         |          |         |   |         |          |          |   |          |          |          |   |          |          |         |   |          |         |         |   |          |          |         |   |         |         |          |
| C                                              | -2.96661                                                                                                                                                                                                                                                                                                                                                                                                                                                                                                                                                                                                                                                                                                                                                                                                                                                                                                                                                                                                                                                                                                                                                                                                                                                                                                                                                                                                                                                                                                                                                                                                                                                                                                                                                                                                                                                                                                                                                                                                                                     | -1.11055 | 0.67668  |         |         |   |          |         |         |   |          |         |          |   |          |          |          |   |          |          |          |   |          |          |          |   |          |          |         |   |          |          |         |   |          |         |         |   |          |          |          |   |          |          |         |   |         |          |         |   |         |         |         |   |         |          |         |   |         |          |          |   |         |          |          |   |         |          |          |   |         |          |          |   |         |          |         |   |         |          |          |   |         |          |         |   |         |          |          |   |          |          |          |   |          |          |         |   |          |         |         |   |          |          |         |   |         |         |          |
| N                                              | -2.37393                                                                                                                                                                                                                                                                                                                                                                                                                                                                                                                                                                                                                                                                                                                                                                                                                                                                                                                                                                                                                                                                                                                                                                                                                                                                                                                                                                                                                                                                                                                                                                                                                                                                                                                                                                                                                                                                                                                                                                                                                                     | -2.28183 | 0.39828  |         |         |   |          |         |         |   |          |         |          |   |          |          |          |   |          |          |          |   |          |          |          |   |          |          |         |   |          |          |         |   |          |         |         |   |          |          |          |   |          |          |         |   |         |          |         |   |         |         |         |   |         |          |         |   |         |          |          |   |         |          |          |   |         |          |          |   |         |          |          |   |         |          |         |   |         |          |          |   |         |          |         |   |         |          |          |   |          |          |          |   |          |          |         |   |          |         |         |   |          |          |         |   |         |         |          |
| C                                              | -5.18385                                                                                                                                                                                                                                                                                                                                                                                                                                                                                                                                                                                                                                                                                                                                                                                                                                                                                                                                                                                                                                                                                                                                                                                                                                                                                                                                                                                                                                                                                                                                                                                                                                                                                                                                                                                                                                                                                                                                                                                                                                     | 3.69785  | 0.90105  |         |         |   |          |         |         |   |          |         |          |   |          |          |          |   |          |          |          |   |          |          |          |   |          |          |         |   |          |          |         |   |          |         |         |   |          |          |          |   |          |          |         |   |         |          |         |   |         |         |         |   |         |          |         |   |         |          |          |   |         |          |          |   |         |          |          |   |         |          |          |   |         |          |         |   |         |          |          |   |         |          |         |   |         |          |          |   |          |          |          |   |          |          |         |   |          |         |         |   |          |          |         |   |         |         |          |
| C                                              | -5.38262                                                                                                                                                                                                                                                                                                                                                                                                                                                                                                                                                                                                                                                                                                                                                                                                                                                                                                                                                                                                                                                                                                                                                                                                                                                                                                                                                                                                                                                                                                                                                                                                                                                                                                                                                                                                                                                                                                                                                                                                                                     | -2.19952 | -1.76296 |         |         |   |          |         |         |   |          |         |          |   |          |          |          |   |          |          |          |   |          |          |          |   |          |          |         |   |          |          |         |   |          |         |         |   |          |          |          |   |          |          |         |   |         |          |         |   |         |         |         |   |         |          |         |   |         |          |          |   |         |          |          |   |         |          |          |   |         |          |          |   |         |          |         |   |         |          |          |   |         |          |         |   |         |          |          |   |          |          |          |   |          |          |         |   |          |         |         |   |          |          |         |   |         |         |          |
| C                                              | -0.63452                                                                                                                                                                                                                                                                                                                                                                                                                                                                                                                                                                                                                                                                                                                                                                                                                                                                                                                                                                                                                                                                                                                                                                                                                                                                                                                                                                                                                                                                                                                                                                                                                                                                                                                                                                                                                                                                                                                                                                                                                                     | -2.71266 | 1.07698  |         |         |   |          |         |         |   |          |         |          |   |          |          |          |   |          |          |          |   |          |          |          |   |          |          |         |   |          |          |         |   |          |         |         |   |          |          |          |   |          |          |         |   |         |          |         |   |         |         |         |   |         |          |         |   |         |          |          |   |         |          |          |   |         |          |          |   |         |          |          |   |         |          |         |   |         |          |          |   |         |          |         |   |         |          |          |   |          |          |          |   |          |          |         |   |          |         |         |   |          |          |         |   |         |         |          |
| C                                              | 0.54228                                                                                                                                                                                                                                                                                                                                                                                                                                                                                                                                                                                                                                                                                                                                                                                                                                                                                                                                                                                                                                                                                                                                                                                                                                                                                                                                                                                                                                                                                                                                                                                                                                                                                                                                                                                                                                                                                                                                                                                                                                      | -0.62419 | 1.66188  |         |         |   |          |         |         |   |          |         |          |   |          |          |          |   |          |          |          |   |          |          |          |   |          |          |         |   |          |          |         |   |          |         |         |   |          |          |          |   |          |          |         |   |         |          |         |   |         |         |         |   |         |          |         |   |         |          |          |   |         |          |          |   |         |          |          |   |         |          |          |   |         |          |         |   |         |          |          |   |         |          |         |   |         |          |          |   |          |          |          |   |          |          |         |   |          |         |         |   |          |          |         |   |         |         |          |
| O                                              | 1.37340                                                                                                                                                                                                                                                                                                                                                                                                                                                                                                                                                                                                                                                                                                                                                                                                                                                                                                                                                                                                                                                                                                                                                                                                                                                                                                                                                                                                                                                                                                                                                                                                                                                                                                                                                                                                                                                                                                                                                                                                                                      | 0.28282  | 1.54171  |         |         |   |          |         |         |   |          |         |          |   |          |          |          |   |          |          |          |   |          |          |          |   |          |          |         |   |          |          |         |   |          |         |         |   |          |          |          |   |          |          |         |   |         |          |         |   |         |         |         |   |         |          |         |   |         |          |          |   |         |          |          |   |         |          |          |   |         |          |          |   |         |          |         |   |         |          |          |   |         |          |         |   |         |          |          |   |          |          |          |   |          |          |         |   |          |         |         |   |          |          |         |   |         |         |          |
| C                                              | 0.33754                                                                                                                                                                                                                                                                                                                                                                                                                                                                                                                                                                                                                                                                                                                                                                                                                                                                                                                                                                                                                                                                                                                                                                                                                                                                                                                                                                                                                                                                                                                                                                                                                                                                                                                                                                                                                                                                                                                                                                                                                                      | -1.73043 | 0.77416  |         |         |   |          |         |         |   |          |         |          |   |          |          |          |   |          |          |          |   |          |          |          |   |          |          |         |   |          |          |         |   |          |         |         |   |          |          |          |   |          |          |         |   |         |          |         |   |         |         |         |   |         |          |         |   |         |          |          |   |         |          |          |   |         |          |          |   |         |          |          |   |         |          |         |   |         |          |          |   |         |          |         |   |         |          |          |   |          |          |          |   |          |          |         |   |          |         |         |   |          |          |         |   |         |         |          |
| C                                              | 1.10555                                                                                                                                                                                                                                                                                                                                                                                                                                                                                                                                                                                                                                                                                                                                                                                                                                                                                                                                                                                                                                                                                                                                                                                                                                                                                                                                                                                                                                                                                                                                                                                                                                                                                                                                                                                                                                                                                                                                                                                                                                      | -1.72293 | -0.52812 |         |         |   |          |         |         |   |          |         |          |   |          |          |          |   |          |          |          |   |          |          |          |   |          |          |         |   |          |          |         |   |          |         |         |   |          |          |          |   |          |          |         |   |         |          |         |   |         |         |         |   |         |          |         |   |         |          |          |   |         |          |          |   |         |          |          |   |         |          |          |   |         |          |         |   |         |          |          |   |         |          |         |   |         |          |          |   |          |          |          |   |          |          |         |   |          |         |         |   |          |          |         |   |         |         |          |
| C                                              | 2.62702                                                                                                                                                                                                                                                                                                                                                                                                                                                                                                                                                                                                                                                                                                                                                                                                                                                                                                                                                                                                                                                                                                                                                                                                                                                                                                                                                                                                                                                                                                                                                                                                                                                                                                                                                                                                                                                                                                                                                                                                                                      | -1.83008 | -0.39814 |         |         |   |          |         |         |   |          |         |          |   |          |          |          |   |          |          |          |   |          |          |          |   |          |          |         |   |          |          |         |   |          |         |         |   |          |          |          |   |          |          |         |   |         |          |         |   |         |         |         |   |         |          |         |   |         |          |          |   |         |          |          |   |         |          |          |   |         |          |          |   |         |          |         |   |         |          |          |   |         |          |         |   |         |          |          |   |          |          |          |   |          |          |         |   |          |         |         |   |          |          |         |   |         |         |          |
| O                                              | 0.82078                                                                                                                                                                                                                                                                                                                                                                                                                                                                                                                                                                                                                                                                                                                                                                                                                                                                                                                                                                                                                                                                                                                                                                                                                                                                                                                                                                                                                                                                                                                                                                                                                                                                                                                                                                                                                                                                                                                                                                                                                                      | -0.59008 | -1.37824 |         |         |   |          |         |         |   |          |         |          |   |          |          |          |   |          |          |          |   |          |          |          |   |          |          |         |   |          |          |         |   |          |         |         |   |          |          |          |   |          |          |         |   |         |          |         |   |         |         |         |   |         |          |         |   |         |          |          |   |         |          |          |   |         |          |          |   |         |          |          |   |         |          |         |   |         |          |          |   |         |          |         |   |         |          |          |   |          |          |          |   |          |          |         |   |          |         |         |   |          |          |         |   |         |         |          |
| C                                              | 3.46870                                                                                                                                                                                                                                                                                                                                                                                                                                                                                                                                                                                                                                                                                                                                                                                                                                                                                                                                                                                                                                                                                                                                                                                                                                                                                                                                                                                                                                                                                                                                                                                                                                                                                                                                                                                                                                                                                                                                                                                                                                      | -1.31513 | -1.39253 |         |         |   |          |         |         |   |          |         |          |   |          |          |          |   |          |          |          |   |          |          |          |   |          |          |         |   |          |          |         |   |          |         |         |   |          |          |          |   |          |          |         |   |         |          |         |   |         |         |         |   |         |          |         |   |         |          |          |   |         |          |          |   |         |          |          |   |         |          |          |   |         |          |         |   |         |          |          |   |         |          |         |   |         |          |          |   |          |          |          |   |          |          |         |   |          |         |         |   |          |          |         |   |         |         |          |
| C                                              | 3.20910                                                                                                                                                                                                                                                                                                                                                                                                                                                                                                                                                                                                                                                                                                                                                                                                                                                                                                                                                                                                                                                                                                                                                                                                                                                                                                                                                                                                                                                                                                                                                                                                                                                                                                                                                                                                                                                                                                                                                                                                                                      | -2.53571 | 0.66238  |         |         |   |          |         |         |   |          |         |          |   |          |          |          |   |          |          |          |   |          |          |          |   |          |          |         |   |          |          |         |   |          |         |         |   |          |          |          |   |          |          |         |   |         |          |         |   |         |         |         |   |         |          |         |   |         |          |          |   |         |          |          |   |         |          |          |   |         |          |          |   |         |          |         |   |         |          |          |   |         |          |         |   |         |          |          |   |          |          |          |   |          |          |         |   |          |         |         |   |          |          |         |   |         |         |          |
| C                                              | 4.85201                                                                                                                                                                                                                                                                                                                                                                                                                                                                                                                                                                                                                                                                                                                                                                                                                                                                                                                                                                                                                                                                                                                                                                                                                                                                                                                                                                                                                                                                                                                                                                                                                                                                                                                                                                                                                                                                                                                                                                                                                                      | -1.49064 | -1.32328 |         |         |   |          |         |         |   |          |         |          |   |          |          |          |   |          |          |          |   |          |          |          |   |          |          |         |   |          |          |         |   |          |         |         |   |          |          |          |   |          |          |         |   |         |          |         |   |         |         |         |   |         |          |         |   |         |          |          |   |         |          |          |   |         |          |          |   |         |          |          |   |         |          |         |   |         |          |          |   |         |          |         |   |         |          |          |   |          |          |          |   |          |          |         |   |          |         |         |   |          |          |         |   |         |         |          |
| C                                              | 4.59026                                                                                                                                                                                                                                                                                                                                                                                                                                                                                                                                                                                                                                                                                                                                                                                                                                                                                                                                                                                                                                                                                                                                                                                                                                                                                                                                                                                                                                                                                                                                                                                                                                                                                                                                                                                                                                                                                                                                                                                                                                      | -2.72171 | 0.73037  |         |         |   |          |         |         |   |          |         |          |   |          |          |          |   |          |          |          |   |          |          |          |   |          |          |         |   |          |          |         |   |          |         |         |   |          |          |          |   |          |          |         |   |         |          |         |   |         |         |         |   |         |          |         |   |         |          |          |   |         |          |          |   |         |          |          |   |         |          |          |   |         |          |         |   |         |          |          |   |         |          |         |   |         |          |          |   |          |          |          |   |          |          |         |   |          |         |         |   |          |          |         |   |         |         |          |
| C                                              | 5.42076                                                                                                                                                                                                                                                                                                                                                                                                                                                                                                                                                                                                                                                                                                                                                                                                                                                                                                                                                                                                                                                                                                                                                                                                                                                                                                                                                                                                                                                                                                                                                                                                                                                                                                                                                                                                                                                                                                                                                                                                                                      | -2.19866 | -0.26295 |         |         |   |          |         |         |   |          |         |          |   |          |          |          |   |          |          |          |   |          |          |          |   |          |          |         |   |          |          |         |   |          |         |         |   |          |          |          |   |          |          |         |   |         |          |         |   |         |         |         |   |         |          |         |   |         |          |          |   |         |          |          |   |         |          |          |   |         |          |          |   |         |          |         |   |         |          |          |   |         |          |         |   |         |          |          |   |          |          |          |   |          |          |         |   |          |         |         |   |          |          |         |   |         |         |          |
| H                                              | -2.32082                                                                                                                                                                                                                                                                                                                                                                                                                                                                                                                                                                                                                                                                                                                                                                                                                                                                                                                                                                                                                                                                                                                                                                                                                                                                                                                                                                                                                                                                                                                                                                                                                                                                                                                                                                                                                                                                                                                                                                                                                                     | -1.40186 | -2.07712 |         |         |   |          |         |         |   |          |         |          |   |          |          |          |   |          |          |          |   |          |          |          |   |          |          |         |   |          |          |         |   |          |         |         |   |          |          |          |   |          |          |         |   |         |          |         |   |         |         |         |   |         |          |         |   |         |          |          |   |         |          |          |   |         |          |          |   |         |          |          |   |         |          |         |   |         |          |          |   |         |          |         |   |         |          |          |   |          |          |          |   |          |          |         |   |          |         |         |   |          |          |         |   |         |         |          |
| O                                              | -0.29333                                                                                                                                                                                                                                                                                                                                                                                                                                                                                                                                                                                                                                                                                                                                                                                                                                                                                                                                                                                                                                                                                                                                                                                                                                                                                                                                                                                                                                                                                                                                                                                                                                                                                                                                                                                                                                                                                                                                                                                                                                     | -0.62500 | 2.76931  |         |         |   |          |         |         |   |          |         |          |   |          |          |          |   |          |          |          |   |          |          |          |   |          |          |         |   |          |          |         |   |          |         |         |   |          |          |          |   |          |          |         |   |         |          |         |   |         |         |         |   |         |          |         |   |         |          |          |   |         |          |          |   |         |          |          |   |         |          |          |   |         |          |         |   |         |          |          |   |         |          |         |   |         |          |          |   |          |          |          |   |          |          |         |   |          |         |         |   |          |          |         |   |         |         |          |
| C                                              | -0.10869                                                                                                                                                                                                                                                                                                                                                                                                                                                                                                                                                                                                                                                                                                                                                                                                                                                                                                                                                                                                                                                                                                                                                                                                                                                                                                                                                                                                                                                                                                                                                                                                                                                                                                                                                                                                                                                                                                                                                                                                                                     | 0.46446  | 3.66802  |         |         |   |          |         |         |   |          |         |          |   |          |          |          |   |          |          |          |   |          |          |          |   |          |          |         |   |          |          |         |   |          |         |         |   |          |          |          |   |          |          |         |   |         |          |         |   |         |         |         |   |         |          |         |   |         |          |          |   |         |          |          |   |         |          |          |   |         |          |          |   |         |          |         |   |         |          |          |   |         |          |         |   |         |          |          |   |          |          |          |   |          |          |         |   |          |         |         |   |          |          |         |   |         |         |          |
| C                                              | -0.53154                                                                                                                                                                                                                                                                                                                                                                                                                                                                                                                                                                                                                                                                                                                                                                                                                                                                                                                                                                                                                                                                                                                                                                                                                                                                                                                                                                                                                                                                                                                                                                                                                                                                                                                                                                                                                                                                                                                                                                                                                                     | -4.13358 | 0.55594  |         |         |   |          |         |         |   |          |         |          |   |          |          |          |   |          |          |          |   |          |          |          |   |          |          |         |   |          |          |         |   |          |         |         |   |          |          |          |   |          |          |         |   |         |          |         |   |         |         |         |   |         |          |         |   |         |          |          |   |         |          |          |   |         |          |          |   |         |          |          |   |         |          |         |   |         |          |          |   |         |          |         |   |         |          |          |   |          |          |          |   |          |          |         |   |          |         |         |   |          |          |         |   |         |         |          |
| C                                              | 3.89403                                                                                                                                                                                                                                                                                                                                                                                                                                                                                                                                                                                                                                                                                                                                                                                                                                                                                                                                                                                                                                                                                                                                                                                                                                                                                                                                                                                                                                                                                                                                                                                                                                                                                                                                                                                                                                                                                                                                                                                                                                      | 2.48717  | -0.60563 |         |         |   |          |         |         |   |          |         |          |   |          |          |          |   |          |          |          |   |          |          |          |   |          |          |         |   |          |          |         |   |          |         |         |   |          |          |          |   |          |          |         |   |         |          |         |   |         |         |         |   |         |          |         |   |         |          |          |   |         |          |          |   |         |          |          |   |         |          |          |   |         |          |         |   |         |          |          |   |         |          |         |   |         |          |          |   |          |          |          |   |          |          |         |   |          |         |         |   |          |          |         |   |         |         |          |

|   |          |          |          |
|---|----------|----------|----------|
| O | 5.01815  | 2.87642  | -0.93105 |
| C | 2.69910  | 2.75647  | -1.53440 |
| N | 1.40414  | 2.28825  | -1.09193 |
| C | 0.44511  | 3.15631  | -0.65561 |
| O | 0.58981  | 4.37913  | -0.65068 |
| C | -0.84604 | 2.50604  | -0.18395 |
| N | 3.63378  | 1.82408  | 0.54027  |
| C | 4.70649  | 1.45245  | 1.44021  |
| H | 5.01912  | -3.26915 | 1.56745  |
| H | 6.49848  | -2.33562 | -0.20831 |
| H | 5.48653  | -1.06642 | -2.09798 |
| H | 3.02679  | -0.76856 | -2.21819 |
| H | 2.56459  | -2.92535 | 1.44537  |
| H | 0.36378  | -4.60915 | 0.97502  |
| H | -0.44709 | -4.18107 | -0.53420 |
| H | -1.40424 | -4.72277 | 0.85465  |
| H | 0.80087  | -2.61865 | -1.09108 |
| H | -0.97750 | -2.67474 | 2.10529  |
| H | -2.93819 | -3.84603 | -0.97826 |
| H | -6.32880 | -2.28908 | -1.21238 |
| H | -5.49400 | -1.35049 | -2.44953 |
| H | -5.26088 | -3.10652 | -2.36574 |
| H | -2.57659 | -0.39746 | 1.38913  |
| H | -1.01134 | 2.74541  | 0.87082  |
| H | -0.85255 | 1.42016  | -0.29912 |
| H | -1.68233 | 2.93908  | -0.74260 |
| H | 1.22005  | 1.28230  | -1.06834 |
| H | 2.62772  | 3.83903  | -1.66648 |
| H | 2.95545  | 2.31813  | -2.50722 |
| H | 2.71620  | 1.41992  | 0.71330  |
| H | 5.20016  | 2.34109  | 1.85234  |
| H | 4.27617  | 0.86423  | 2.25339  |
| H | -4.89157 | 4.17866  | -0.03936 |
| H | -0.84128 | 0.31521  | 4.46502  |
| H | 0.90530  | 0.47311  | 4.08278  |
| H | -6.27851 | 3.69120  | 0.93685  |
| H | -0.28868 | 1.42323  | 3.17282  |
| H | -4.78234 | 4.26858  | 1.73990  |
| H | 5.46626  | 0.85216  | 0.92609  |
| O | -1.69756 | -0.85036 | -2.58968 |
| H | -0.09069 | -0.69889 | -1.73117 |
| C | -2.36477 | 0.35276  | -2.96007 |
| H | -3.08655 | 0.17606  | -3.77222 |
| H | -1.60055 | 1.04650  | -3.32139 |
| H | -2.89032 | 0.80982  | -2.11401 |
| H | -4.79272 | 0.55966  | 0.02539  |

Optimized Molecular Properties for **T7-product**

|                                                |                                                                                                                                                                                                                                                                                                                                                                                                                                                                                                                                                                                                                                                                                                                            |                          |                   |
|------------------------------------------------|----------------------------------------------------------------------------------------------------------------------------------------------------------------------------------------------------------------------------------------------------------------------------------------------------------------------------------------------------------------------------------------------------------------------------------------------------------------------------------------------------------------------------------------------------------------------------------------------------------------------------------------------------------------------------------------------------------------------------|--------------------------|-------------------|
| Number of<br>(-)<br>Vibrational<br>Frequencies | 0                                                                                                                                                                                                                                                                                                                                                                                                                                                                                                                                                                                                                                                                                                                          |                          |                   |
| Absolute<br>Energies<br>(Hartrees)             | <p><b>B3LYP/6-31G(d)</b></p> <p>There are 25 positive frequencies below 100 cm<sup>-1</sup>.</p> <p>Zero-point correction: 0.603818 hartree<br/>         Enthalpy correction: 0.649054 hartree<br/>         Free Energy correction: 0.515993 hartree<br/>         Quasiharmonic Free Energy correction: 0.533387 hartree</p> <p>SCF Energy: -1757.779382 hartree<br/>         SCF Energy + ZPVE: -1757.175564 hartree<br/>         Enthalpy: -1757.130328 hartree<br/>         Free Energy: -1757.263389 hartree</p> <p>Free Energy with quasiharmonic correction: -1757.245995 hartree<br/>         (correction: 10.92 kcal/mol)</p> <p><b>B3LYP-D3/6-311+G(d,p)</b></p> <p>SCF Done: E(RB3LYP) = -1758.41724937 A.U.</p> |                          |                   |
| Cartesian<br>Coordinates                       | 73<br>spD3-product-T7.out                                                                                                                                                                                                                                                                                                                                                                                                                                                                                                                                                                                                                                                                                                  | Energy: -1103423.4744326 |                   |
|                                                | C                                                                                                                                                                                                                                                                                                                                                                                                                                                                                                                                                                                                                                                                                                                          | 3.83951                  | 2.57813 -1.52439  |
|                                                | O                                                                                                                                                                                                                                                                                                                                                                                                                                                                                                                                                                                                                                                                                                                          | 2.74004                  | 2.02463 -1.26222  |
|                                                | O                                                                                                                                                                                                                                                                                                                                                                                                                                                                                                                                                                                                                                                                                                                          | 4.99754                  | 2.12450 -1.26573  |
|                                                | C                                                                                                                                                                                                                                                                                                                                                                                                                                                                                                                                                                                                                                                                                                                          | 5.51423                  | -1.04636 0.65495  |
|                                                | C                                                                                                                                                                                                                                                                                                                                                                                                                                                                                                                                                                                                                                                                                                                          | 4.71831                  | -1.99365 1.26028  |
|                                                | N                                                                                                                                                                                                                                                                                                                                                                                                                                                                                                                                                                                                                                                                                                                          | 4.64361                  | -0.16424 0.05399  |
|                                                | C                                                                                                                                                                                                                                                                                                                                                                                                                                                                                                                                                                                                                                                                                                                          | 3.39255                  | -0.59205 0.31019  |
|                                                | N                                                                                                                                                                                                                                                                                                                                                                                                                                                                                                                                                                                                                                                                                                                          | 3.38553                  | -1.70544 1.04102  |
|                                                | C                                                                                                                                                                                                                                                                                                                                                                                                                                                                                                                                                                                                                                                                                                                          | 3.78633                  | 3.93769 -2.24658  |
|                                                | C                                                                                                                                                                                                                                                                                                                                                                                                                                                                                                                                                                                                                                                                                                                          | 6.99997                  | -0.89379 0.58927  |
|                                                | C                                                                                                                                                                                                                                                                                                                                                                                                                                                                                                                                                                                                                                                                                                                          | 0.70104                  | -2.36257 -1.52135 |
|                                                | C                                                                                                                                                                                                                                                                                                                                                                                                                                                                                                                                                                                                                                                                                                                          | -0.49968                 | -0.22631 -1.64702 |
|                                                | O                                                                                                                                                                                                                                                                                                                                                                                                                                                                                                                                                                                                                                                                                                                          | -1.21898                 | 0.61766 -1.13846  |
|                                                | C                                                                                                                                                                                                                                                                                                                                                                                                                                                                                                                                                                                                                                                                                                                          | -0.35005                 | -1.61969 -1.12239 |
|                                                | C                                                                                                                                                                                                                                                                                                                                                                                                                                                                                                                                                                                                                                                                                                                          | -1.35689                 | -2.05952 -0.06376 |
|                                                | C                                                                                                                                                                                                                                                                                                                                                                                                                                                                                                                                                                                                                                                                                                                          | -2.80688                 | -1.94184 -0.52076 |
|                                                | O                                                                                                                                                                                                                                                                                                                                                                                                                                                                                                                                                                                                                                                                                                                          | -1.17189                 | -1.36213 1.16212  |
|                                                | C                                                                                                                                                                                                                                                                                                                                                                                                                                                                                                                                                                                                                                                                                                                          | -3.80145                 | -1.48392 0.34819  |
|                                                | C                                                                                                                                                                                                                                                                                                                                                                                                                                                                                                                                                                                                                                                                                                                          | -3.17811                 | -2.36439 -1.80423 |
|                                                | C                                                                                                                                                                                                                                                                                                                                                                                                                                                                                                                                                                                                                                                                                                                          | -5.13471                 | -1.42459 -0.06251 |
|                                                | C                                                                                                                                                                                                                                                                                                                                                                                                                                                                                                                                                                                                                                                                                                                          | -4.51088                 | -2.31744 -2.21365 |
|                                                | C                                                                                                                                                                                                                                                                                                                                                                                                                                                                                                                                                                                                                                                                                                                          | -5.49582                 | -1.84258 -1.34452 |
|                                                | H                                                                                                                                                                                                                                                                                                                                                                                                                                                                                                                                                                                                                                                                                                                          | 1.92733                  | -2.24282 1.75652  |
|                                                | O                                                                                                                                                                                                                                                                                                                                                                                                                                                                                                                                                                                                                                                                                                                          | 0.23700                  | 0.00393 -2.74750  |
|                                                | C                                                                                                                                                                                                                                                                                                                                                                                                                                                                                                                                                                                                                                                                                                                          | 0.32354                  | 1.37659 -3.19067  |
|                                                | C                                                                                                                                                                                                                                                                                                                                                                                                                                                                                                                                                                                                                                                                                                                          | 1.11981                  | -3.72759 -1.06692 |
|                                                | C                                                                                                                                                                                                                                                                                                                                                                                                                                                                                                                                                                                                                                                                                                                          | -3.98739                 | 2.09164 1.30773   |



|   |          |          |          |
|---|----------|----------|----------|
| O | -5.16795 | 2.25423  | 1.62232  |
| C | -2.93338 | 1.87777  | 2.40412  |
| N | -1.60434 | 1.50891  | 1.97191  |
| C | -0.53134 | 2.34094  | 2.16648  |
| O | -0.63669 | 3.45057  | 2.68610  |
| C | 0.80034  | 1.79133  | 1.68738  |
| N | -3.52195 | 2.11670  | 0.03617  |
| C | -4.40724 | 2.23760  | -1.10315 |
| H | -4.77808 | -2.64602 | -3.21560 |
| H | -6.53378 | -1.79470 | -1.66521 |
| H | -5.88561 | -1.03346 | 0.61904  |
| H | -3.52100 | -1.16836 | 1.34611  |
| H | -2.41527 | -2.72469 | -2.49059 |
| H | 1.24681  | -4.39306 | -1.93189 |
| H | 0.42959  | -4.19750 | -0.36342 |
| H | 2.09729  | -3.64741 | -0.57413 |
| H | -1.17985 | -3.12780 | 0.12291  |
| H | 1.37121  | -1.90460 | -2.24474 |
| H | 5.02513  | -2.85738 | 1.83709  |
| H | 7.37059  | -0.93088 | -0.44353 |
| H | 7.33041  | 0.06312  | 1.01339  |
| H | 7.48804  | -1.69766 | 1.15064  |
| H | 2.53794  | -0.04733 | -0.06178 |
| H | 1.07940  | 2.22353  | 0.71900  |
| H | 0.79020  | 0.70320  | 1.57777  |
| H | 1.57433  | 2.07794  | 2.40461  |
| H | -1.45005 | 0.58177  | 1.57595  |
| H | -2.83851 | 2.81710  | 2.95723  |
| H | -3.34931 | 1.13017  | 3.09135  |
| H | -2.56682 | 1.82119  | -0.13620 |
| H | -5.38412 | 2.55706  | -0.73532 |
| H | -4.02234 | 2.98174  | -1.81060 |
| H | 3.10876  | 4.61497  | -1.71446 |
| H | 0.69921  | 1.31892  | -4.21442 |
| H | -0.66462 | 1.84171  | -3.16987 |
| H | 4.77844  | 4.39133  | -2.32397 |
| H | 1.03390  | 1.90997  | -2.54955 |
| H | 3.37692  | 3.80206  | -3.25611 |
| H | -4.51757 | 1.27924  | -1.62578 |
| O | 1.05565  | -2.47164 | 2.21593  |
| H | -0.33272 | -1.71303 | 1.56535  |
| C | 1.22500  | -2.25819 | 3.60542  |
| H | 1.90347  | -3.00242 | 4.05109  |
| H | 0.24592  | -2.35796 | 4.08639  |
| H | 1.61998  | -1.25675 | 3.82939  |
| H | 4.84611  | 0.73986  | -0.49134 |

Optimized Molecular Properties for **T8-complex**

|                                                |                                                                                                                                                                                                                                                                                                                                                                                                                                                                                                                                                                                                                                                                                                                           |                         |                   |
|------------------------------------------------|---------------------------------------------------------------------------------------------------------------------------------------------------------------------------------------------------------------------------------------------------------------------------------------------------------------------------------------------------------------------------------------------------------------------------------------------------------------------------------------------------------------------------------------------------------------------------------------------------------------------------------------------------------------------------------------------------------------------------|-------------------------|-------------------|
| Number of<br>(-)<br>Vibrational<br>Frequencies | 0                                                                                                                                                                                                                                                                                                                                                                                                                                                                                                                                                                                                                                                                                                                         |                         |                   |
| Absolute<br>Energies<br>(Hartrees)             | <p><b>B3LYP/6-31G(d)</b></p> <p>There are 17 positive frequencies below 100 cm<sup>-1</sup>.</p> <p>Zero-point correction: 0.469409 hartree<br/>         Enthalpy correction: 0.506003 hartree<br/>         Free Energy correction: 0.391355 hartree<br/>         Quasiharmonic Free Energy correction: 0.406950 hartree</p> <p>SCF Energy: -1410.980080 hartree<br/>         SCF Energy + ZPVE: -1410.510671 hartree<br/>         Enthalpy: -1410.474077 hartree<br/>         Free Energy: -1410.588725 hartree</p> <p>Free Energy with quasiharmonic correction: -1410.573130 hartree<br/>         (correction: 9.79 kcal/mol)</p> <p><b>B3LYP-D3/6-311+G(d,p)</b></p> <p>SCF Done: E(RB3LYP) = -1411.48892998 A.U.</p> |                         |                   |
| Cartesian<br>Coordinates                       | 57<br>spD3-complex-T8.out                                                                                                                                                                                                                                                                                                                                                                                                                                                                                                                                                                                                                                                                                                 | Energy: -885722.6689511 |                   |
|                                                | C                                                                                                                                                                                                                                                                                                                                                                                                                                                                                                                                                                                                                                                                                                                         | 4.90961                 | 2.73462 -0.35858  |
|                                                | O                                                                                                                                                                                                                                                                                                                                                                                                                                                                                                                                                                                                                                                                                                                         | 3.74739                 | 2.28736 -0.18744  |
|                                                | O                                                                                                                                                                                                                                                                                                                                                                                                                                                                                                                                                                                                                                                                                                                         | 5.94521                 | 2.06782 -0.65806  |
|                                                | C                                                                                                                                                                                                                                                                                                                                                                                                                                                                                                                                                                                                                                                                                                                         | 5.92860                 | -1.69927 -0.71535 |
|                                                | C                                                                                                                                                                                                                                                                                                                                                                                                                                                                                                                                                                                                                                                                                                                         | 5.02539                 | -2.72774 -0.54211 |
|                                                | N                                                                                                                                                                                                                                                                                                                                                                                                                                                                                                                                                                                                                                                                                                                         | 5.18260                 | -0.54597 -0.62857 |
|                                                | C                                                                                                                                                                                                                                                                                                                                                                                                                                                                                                                                                                                                                                                                                                                         | 3.89831                 | -0.91808 -0.41226 |
|                                                | N                                                                                                                                                                                                                                                                                                                                                                                                                                                                                                                                                                                                                                                                                                                         | 3.75029                 | -2.23764 -0.35196 |
|                                                | C                                                                                                                                                                                                                                                                                                                                                                                                                                                                                                                                                                                                                                                                                                                         | 5.10112                 | 4.25756 -0.18331  |
|                                                | C                                                                                                                                                                                                                                                                                                                                                                                                                                                                                                                                                                                                                                                                                                                         | 7.40467                 | -1.69865 -0.95369 |
|                                                | C                                                                                                                                                                                                                                                                                                                                                                                                                                                                                                                                                                                                                                                                                                                         | 0.92505                 | -1.90189 1.47112  |
|                                                | C                                                                                                                                                                                                                                                                                                                                                                                                                                                                                                                                                                                                                                                                                                                         | -0.27292                | 0.27024 1.42980   |
|                                                | O                                                                                                                                                                                                                                                                                                                                                                                                                                                                                                                                                                                                                                                                                                                         | -1.33424                | 0.90928 1.50028   |
|                                                | C                                                                                                                                                                                                                                                                                                                                                                                                                                                                                                                                                                                                                                                                                                                         | -0.21782                | -1.19725 1.52304  |
|                                                | H                                                                                                                                                                                                                                                                                                                                                                                                                                                                                                                                                                                                                                                                                                                         | -1.18832                | -1.67703 1.62706  |
|                                                | O                                                                                                                                                                                                                                                                                                                                                                                                                                                                                                                                                                                                                                                                                                                         | 0.90328                 | 0.85535 1.24215   |
|                                                | C                                                                                                                                                                                                                                                                                                                                                                                                                                                                                                                                                                                                                                                                                                                         | 0.94031                 | 2.29555 1.09776   |
|                                                | C                                                                                                                                                                                                                                                                                                                                                                                                                                                                                                                                                                                                                                                                                                                         | 1.03053                 | -3.38917 1.50647  |
|                                                | H                                                                                                                                                                                                                                                                                                                                                                                                                                                                                                                                                                                                                                                                                                                         | 1.63895                 | -3.70633 0.65089  |
|                                                | H                                                                                                                                                                                                                                                                                                                                                                                                                                                                                                                                                                                                                                                                                                                         | 0.05443                 | -3.88542 1.49422  |
|                                                | H                                                                                                                                                                                                                                                                                                                                                                                                                                                                                                                                                                                                                                                                                                                         | 1.57842                 | -3.70980 2.40387  |
|                                                | H                                                                                                                                                                                                                                                                                                                                                                                                                                                                                                                                                                                                                                                                                                                         | 1.86964                 | -1.37480 1.36882  |
|                                                | H                                                                                                                                                                                                                                                                                                                                                                                                                                                                                                                                                                                                                                                                                                                         | 5.22839                 | -3.79316 -0.54629 |
|                                                | H                                                                                                                                                                                                                                                                                                                                                                                                                                                                                                                                                                                                                                                                                                                         | 7.66851                 | -1.23092 -1.91201 |
|                                                | H                                                                                                                                                                                                                                                                                                                                                                                                                                                                                                                                                                                                                                                                                                                         | 7.94758                 | -1.14941 -0.17277 |
|                                                | H                                                                                                                                                                                                                                                                                                                                                                                                                                                                                                                                                                                                                                                                                                                         | 7.78487                 | -2.72626 -0.96738 |
|                                                | H                                                                                                                                                                                                                                                                                                                                                                                                                                                                                                                                                                                                                                                                                                                         | 3.12572                 | -0.17015 -0.30084 |

|   |          |          |          |
|---|----------|----------|----------|
| H | 6.12874  | 4.56422  | -0.39984 |
| H | 1.95003  | 2.51919  | 0.74055  |
| H | 0.18043  | 2.61254  | 0.37872  |
| H | 4.41073  | 4.79764  | -0.84297 |
| H | 0.72712  | 2.75921  | 2.06618  |
| H | 4.84859  | 4.54464  | 0.84555  |
| H | 5.50907  | 0.46226  | -0.67270 |
| C | -3.21114 | -0.62979 | -1.49973 |
| O | -3.98672 | -1.38169 | -2.10582 |
| N | -3.56337 | 0.03415  | -0.36927 |
| C | -4.79271 | -0.26318 | 0.37614  |
| C | -6.02637 | 0.45761  | -0.22407 |
| O | -6.63883 | 1.32654  | 0.39494  |
| O | -3.55527 | -0.56190 | 2.47979  |
| N | -6.37297 | 0.01367  | -1.46106 |
| C | -7.44847 | 0.61229  | -2.22415 |
| H | -2.73755 | -0.05967 | 2.28818  |
| H | -4.96121 | -1.34569 | 0.30880  |
| H | -2.83337 | 0.53508  | 0.13210  |
| H | -7.06859 | 1.17299  | -3.08900 |
| H | -5.72934 | -0.64397 | -1.90421 |
| H | -8.14324 | -0.15458 | -2.58820 |
| H | -7.98395 | 1.29895  | -1.56600 |
| C | -4.62193 | 0.12510  | 1.85349  |
| H | -4.50885 | 1.21483  | 1.93026  |
| H | -5.54551 | -0.13439 | 2.37868  |
| C | -1.78724 | -0.40792 | -1.97814 |
| H | -1.39529 | 0.57259  | -1.69231 |
| H | -1.75745 | -0.51287 | -3.06451 |
| H | -1.13090 | -1.17134 | -1.54407 |

Optimized Molecular Properties for **T8-TS1**

|                                                |                                                                                                                                                                                                                                                                                                                                                                                                                                                                                                                                                                                                                                                                                                                                                                                                                                                                                                                                                                                                                                                                                                                                                                                                                                                                                                                                                                                                                                                                                                                                                                                                                                                                                                                                                                                                                                                                                                                                                                                                                                                        |          |          |          |          |   |          |          |          |   |          |         |          |   |          |         |          |   |          |         |          |   |          |         |          |   |          |          |          |   |          |          |          |   |          |          |          |   |          |         |          |   |          |          |          |   |         |         |         |   |         |         |         |   |          |          |          |   |         |          |          |   |          |          |         |   |         |         |         |   |          |          |          |   |          |          |          |   |          |          |          |   |          |          |          |   |          |          |         |   |          |         |          |   |          |         |          |   |          |         |         |   |          |         |          |   |          |          |          |
|------------------------------------------------|--------------------------------------------------------------------------------------------------------------------------------------------------------------------------------------------------------------------------------------------------------------------------------------------------------------------------------------------------------------------------------------------------------------------------------------------------------------------------------------------------------------------------------------------------------------------------------------------------------------------------------------------------------------------------------------------------------------------------------------------------------------------------------------------------------------------------------------------------------------------------------------------------------------------------------------------------------------------------------------------------------------------------------------------------------------------------------------------------------------------------------------------------------------------------------------------------------------------------------------------------------------------------------------------------------------------------------------------------------------------------------------------------------------------------------------------------------------------------------------------------------------------------------------------------------------------------------------------------------------------------------------------------------------------------------------------------------------------------------------------------------------------------------------------------------------------------------------------------------------------------------------------------------------------------------------------------------------------------------------------------------------------------------------------------------|----------|----------|----------|----------|---|----------|----------|----------|---|----------|---------|----------|---|----------|---------|----------|---|----------|---------|----------|---|----------|---------|----------|---|----------|----------|----------|---|----------|----------|----------|---|----------|----------|----------|---|----------|---------|----------|---|----------|----------|----------|---|---------|---------|---------|---|---------|---------|---------|---|----------|----------|----------|---|---------|----------|----------|---|----------|----------|---------|---|---------|---------|---------|---|----------|----------|----------|---|----------|----------|----------|---|----------|----------|----------|---|----------|----------|----------|---|----------|----------|---------|---|----------|---------|----------|---|----------|---------|----------|---|----------|---------|---------|---|----------|---------|----------|---|----------|----------|----------|
| Number of<br>(-)<br>Vibrational<br>Frequencies | 1 (-149.2073)                                                                                                                                                                                                                                                                                                                                                                                                                                                                                                                                                                                                                                                                                                                                                                                                                                                                                                                                                                                                                                                                                                                                                                                                                                                                                                                                                                                                                                                                                                                                                                                                                                                                                                                                                                                                                                                                                                                                                                                                                                          |          |          |          |          |   |          |          |          |   |          |         |          |   |          |         |          |   |          |         |          |   |          |         |          |   |          |          |          |   |          |          |          |   |          |          |          |   |          |         |          |   |          |          |          |   |         |         |         |   |         |         |         |   |          |          |          |   |         |          |          |   |          |          |         |   |         |         |         |   |          |          |          |   |          |          |          |   |          |          |          |   |          |          |          |   |          |          |         |   |          |         |          |   |          |         |          |   |          |         |         |   |          |         |          |   |          |          |          |
| Absolute<br>Energies<br>(Hartrees)             | <p><b>B3LYP/6-31G(d)</b></p> <p>There are 16 positive frequencies below 100 cm<sup>-1</sup>.</p> <p>Zero-point correction: 0.468207 hartree<br/>         Enthalpy correction: 0.503648 hartree<br/>         Free Energy correction: 0.391049 hartree<br/>         Quasiharmonic Free Energy correction: 0.407082 hartree</p> <p>SCF Energy: -1410.960427 hartree<br/>         SCF Energy + ZPVE: -1410.492220 hartree<br/>         Enthalpy: -1410.456779 hartree<br/>         Free Energy: -1410.569378 hartree</p> <p>Free Energy with quasiharmonic correction: -1410.553345 hartree<br/>         (correction: 10.06 kcal/mol)</p> <p><b>B3LYP-D3/6-311+G(d,p)</b></p> <p>SCF Done: E(RB3LYP) = -1411.47260017 A.U.</p>                                                                                                                                                                                                                                                                                                                                                                                                                                                                                                                                                                                                                                                                                                                                                                                                                                                                                                                                                                                                                                                                                                                                                                                                                                                                                                                             |          |          |          |          |   |          |          |          |   |          |         |          |   |          |         |          |   |          |         |          |   |          |         |          |   |          |          |          |   |          |          |          |   |          |          |          |   |          |         |          |   |          |          |          |   |         |         |         |   |         |         |         |   |          |          |          |   |         |          |          |   |          |          |         |   |         |         |         |   |          |          |          |   |          |          |          |   |          |          |          |   |          |          |          |   |          |          |         |   |          |         |          |   |          |         |          |   |          |         |         |   |          |         |          |   |          |          |          |
| Cartesian<br>Coordinates                       | <p>57<br/>         spD3-TS1-T8.out Energy: -885712.4218407</p> <table> <tr><td>C</td><td>-7.87446</td><td>-0.63154</td><td>-0.13770</td></tr> <tr><td>O</td><td>-7.08534</td><td>-1.59764</td><td>-0.10066</td></tr> <tr><td>O</td><td>-7.57522</td><td>0.61090</td><td>-0.21537</td></tr> <tr><td>C</td><td>-4.08341</td><td>1.79340</td><td>-0.37124</td></tr> <tr><td>C</td><td>-2.82221</td><td>1.23874</td><td>-0.37026</td></tr> <tr><td>N</td><td>-4.96304</td><td>0.73599</td><td>-0.28636</td></tr> <tr><td>C</td><td>-4.23518</td><td>-0.39464</td><td>-0.23861</td></tr> <tr><td>N</td><td>-2.93153</td><td>-0.12692</td><td>-0.29085</td></tr> <tr><td>C</td><td>-9.38957</td><td>-0.91777</td><td>-0.09200</td></tr> <tr><td>C</td><td>-4.53420</td><td>3.21725</td><td>-0.44615</td></tr> <tr><td>C</td><td>-1.24789</td><td>-1.34269</td><td>-0.15272</td></tr> <tr><td>C</td><td>0.45781</td><td>0.01455</td><td>1.03902</td></tr> <tr><td>O</td><td>1.50247</td><td>0.70429</td><td>1.09094</td></tr> <tr><td>C</td><td>-0.09762</td><td>-0.56429</td><td>-0.13610</td></tr> <tr><td>H</td><td>0.40750</td><td>-0.30733</td><td>-1.06312</td></tr> <tr><td>O</td><td>-0.22260</td><td>-0.24862</td><td>2.19180</td></tr> <tr><td>C</td><td>0.32036</td><td>0.32151</td><td>3.38098</td></tr> <tr><td>C</td><td>-1.55666</td><td>-2.21724</td><td>-1.34115</td></tr> <tr><td>H</td><td>-0.92090</td><td>-3.11323</td><td>-1.30393</td></tr> <tr><td>H</td><td>-1.34461</td><td>-1.69528</td><td>-2.27960</td></tr> <tr><td>H</td><td>-2.60019</td><td>-2.53989</td><td>-1.35220</td></tr> <tr><td>H</td><td>-1.61292</td><td>-1.69887</td><td>0.80429</td></tr> <tr><td>H</td><td>-1.85453</td><td>1.72107</td><td>-0.42247</td></tr> <tr><td>H</td><td>-5.16631</td><td>3.39877</td><td>-1.32495</td></tr> <tr><td>H</td><td>-5.12111</td><td>3.50567</td><td>0.43545</td></tr> <tr><td>H</td><td>-3.66877</td><td>3.88502</td><td>-0.50916</td></tr> <tr><td>H</td><td>-4.71593</td><td>-1.36037</td><td>-0.16667</td></tr> </table> | C        | -7.87446 | -0.63154 | -0.13770 | O | -7.08534 | -1.59764 | -0.10066 | O | -7.57522 | 0.61090 | -0.21537 | C | -4.08341 | 1.79340 | -0.37124 | C | -2.82221 | 1.23874 | -0.37026 | N | -4.96304 | 0.73599 | -0.28636 | C | -4.23518 | -0.39464 | -0.23861 | N | -2.93153 | -0.12692 | -0.29085 | C | -9.38957 | -0.91777 | -0.09200 | C | -4.53420 | 3.21725 | -0.44615 | C | -1.24789 | -1.34269 | -0.15272 | C | 0.45781 | 0.01455 | 1.03902 | O | 1.50247 | 0.70429 | 1.09094 | C | -0.09762 | -0.56429 | -0.13610 | H | 0.40750 | -0.30733 | -1.06312 | O | -0.22260 | -0.24862 | 2.19180 | C | 0.32036 | 0.32151 | 3.38098 | C | -1.55666 | -2.21724 | -1.34115 | H | -0.92090 | -3.11323 | -1.30393 | H | -1.34461 | -1.69528 | -2.27960 | H | -2.60019 | -2.53989 | -1.35220 | H | -1.61292 | -1.69887 | 0.80429 | H | -1.85453 | 1.72107 | -0.42247 | H | -5.16631 | 3.39877 | -1.32495 | H | -5.12111 | 3.50567 | 0.43545 | H | -3.66877 | 3.88502 | -0.50916 | H | -4.71593 | -1.36037 | -0.16667 |
| C                                              | -7.87446                                                                                                                                                                                                                                                                                                                                                                                                                                                                                                                                                                                                                                                                                                                                                                                                                                                                                                                                                                                                                                                                                                                                                                                                                                                                                                                                                                                                                                                                                                                                                                                                                                                                                                                                                                                                                                                                                                                                                                                                                                               | -0.63154 | -0.13770 |          |          |   |          |          |          |   |          |         |          |   |          |         |          |   |          |         |          |   |          |         |          |   |          |          |          |   |          |          |          |   |          |          |          |   |          |         |          |   |          |          |          |   |         |         |         |   |         |         |         |   |          |          |          |   |         |          |          |   |          |          |         |   |         |         |         |   |          |          |          |   |          |          |          |   |          |          |          |   |          |          |          |   |          |          |         |   |          |         |          |   |          |         |          |   |          |         |         |   |          |         |          |   |          |          |          |
| O                                              | -7.08534                                                                                                                                                                                                                                                                                                                                                                                                                                                                                                                                                                                                                                                                                                                                                                                                                                                                                                                                                                                                                                                                                                                                                                                                                                                                                                                                                                                                                                                                                                                                                                                                                                                                                                                                                                                                                                                                                                                                                                                                                                               | -1.59764 | -0.10066 |          |          |   |          |          |          |   |          |         |          |   |          |         |          |   |          |         |          |   |          |         |          |   |          |          |          |   |          |          |          |   |          |          |          |   |          |         |          |   |          |          |          |   |         |         |         |   |         |         |         |   |          |          |          |   |         |          |          |   |          |          |         |   |         |         |         |   |          |          |          |   |          |          |          |   |          |          |          |   |          |          |          |   |          |          |         |   |          |         |          |   |          |         |          |   |          |         |         |   |          |         |          |   |          |          |          |
| O                                              | -7.57522                                                                                                                                                                                                                                                                                                                                                                                                                                                                                                                                                                                                                                                                                                                                                                                                                                                                                                                                                                                                                                                                                                                                                                                                                                                                                                                                                                                                                                                                                                                                                                                                                                                                                                                                                                                                                                                                                                                                                                                                                                               | 0.61090  | -0.21537 |          |          |   |          |          |          |   |          |         |          |   |          |         |          |   |          |         |          |   |          |         |          |   |          |          |          |   |          |          |          |   |          |          |          |   |          |         |          |   |          |          |          |   |         |         |         |   |         |         |         |   |          |          |          |   |         |          |          |   |          |          |         |   |         |         |         |   |          |          |          |   |          |          |          |   |          |          |          |   |          |          |          |   |          |          |         |   |          |         |          |   |          |         |          |   |          |         |         |   |          |         |          |   |          |          |          |
| C                                              | -4.08341                                                                                                                                                                                                                                                                                                                                                                                                                                                                                                                                                                                                                                                                                                                                                                                                                                                                                                                                                                                                                                                                                                                                                                                                                                                                                                                                                                                                                                                                                                                                                                                                                                                                                                                                                                                                                                                                                                                                                                                                                                               | 1.79340  | -0.37124 |          |          |   |          |          |          |   |          |         |          |   |          |         |          |   |          |         |          |   |          |         |          |   |          |          |          |   |          |          |          |   |          |          |          |   |          |         |          |   |          |          |          |   |         |         |         |   |         |         |         |   |          |          |          |   |         |          |          |   |          |          |         |   |         |         |         |   |          |          |          |   |          |          |          |   |          |          |          |   |          |          |          |   |          |          |         |   |          |         |          |   |          |         |          |   |          |         |         |   |          |         |          |   |          |          |          |
| C                                              | -2.82221                                                                                                                                                                                                                                                                                                                                                                                                                                                                                                                                                                                                                                                                                                                                                                                                                                                                                                                                                                                                                                                                                                                                                                                                                                                                                                                                                                                                                                                                                                                                                                                                                                                                                                                                                                                                                                                                                                                                                                                                                                               | 1.23874  | -0.37026 |          |          |   |          |          |          |   |          |         |          |   |          |         |          |   |          |         |          |   |          |         |          |   |          |          |          |   |          |          |          |   |          |          |          |   |          |         |          |   |          |          |          |   |         |         |         |   |         |         |         |   |          |          |          |   |         |          |          |   |          |          |         |   |         |         |         |   |          |          |          |   |          |          |          |   |          |          |          |   |          |          |          |   |          |          |         |   |          |         |          |   |          |         |          |   |          |         |         |   |          |         |          |   |          |          |          |
| N                                              | -4.96304                                                                                                                                                                                                                                                                                                                                                                                                                                                                                                                                                                                                                                                                                                                                                                                                                                                                                                                                                                                                                                                                                                                                                                                                                                                                                                                                                                                                                                                                                                                                                                                                                                                                                                                                                                                                                                                                                                                                                                                                                                               | 0.73599  | -0.28636 |          |          |   |          |          |          |   |          |         |          |   |          |         |          |   |          |         |          |   |          |         |          |   |          |          |          |   |          |          |          |   |          |          |          |   |          |         |          |   |          |          |          |   |         |         |         |   |         |         |         |   |          |          |          |   |         |          |          |   |          |          |         |   |         |         |         |   |          |          |          |   |          |          |          |   |          |          |          |   |          |          |          |   |          |          |         |   |          |         |          |   |          |         |          |   |          |         |         |   |          |         |          |   |          |          |          |
| C                                              | -4.23518                                                                                                                                                                                                                                                                                                                                                                                                                                                                                                                                                                                                                                                                                                                                                                                                                                                                                                                                                                                                                                                                                                                                                                                                                                                                                                                                                                                                                                                                                                                                                                                                                                                                                                                                                                                                                                                                                                                                                                                                                                               | -0.39464 | -0.23861 |          |          |   |          |          |          |   |          |         |          |   |          |         |          |   |          |         |          |   |          |         |          |   |          |          |          |   |          |          |          |   |          |          |          |   |          |         |          |   |          |          |          |   |         |         |         |   |         |         |         |   |          |          |          |   |         |          |          |   |          |          |         |   |         |         |         |   |          |          |          |   |          |          |          |   |          |          |          |   |          |          |          |   |          |          |         |   |          |         |          |   |          |         |          |   |          |         |         |   |          |         |          |   |          |          |          |
| N                                              | -2.93153                                                                                                                                                                                                                                                                                                                                                                                                                                                                                                                                                                                                                                                                                                                                                                                                                                                                                                                                                                                                                                                                                                                                                                                                                                                                                                                                                                                                                                                                                                                                                                                                                                                                                                                                                                                                                                                                                                                                                                                                                                               | -0.12692 | -0.29085 |          |          |   |          |          |          |   |          |         |          |   |          |         |          |   |          |         |          |   |          |         |          |   |          |          |          |   |          |          |          |   |          |          |          |   |          |         |          |   |          |          |          |   |         |         |         |   |         |         |         |   |          |          |          |   |         |          |          |   |          |          |         |   |         |         |         |   |          |          |          |   |          |          |          |   |          |          |          |   |          |          |          |   |          |          |         |   |          |         |          |   |          |         |          |   |          |         |         |   |          |         |          |   |          |          |          |
| C                                              | -9.38957                                                                                                                                                                                                                                                                                                                                                                                                                                                                                                                                                                                                                                                                                                                                                                                                                                                                                                                                                                                                                                                                                                                                                                                                                                                                                                                                                                                                                                                                                                                                                                                                                                                                                                                                                                                                                                                                                                                                                                                                                                               | -0.91777 | -0.09200 |          |          |   |          |          |          |   |          |         |          |   |          |         |          |   |          |         |          |   |          |         |          |   |          |          |          |   |          |          |          |   |          |          |          |   |          |         |          |   |          |          |          |   |         |         |         |   |         |         |         |   |          |          |          |   |         |          |          |   |          |          |         |   |         |         |         |   |          |          |          |   |          |          |          |   |          |          |          |   |          |          |          |   |          |          |         |   |          |         |          |   |          |         |          |   |          |         |         |   |          |         |          |   |          |          |          |
| C                                              | -4.53420                                                                                                                                                                                                                                                                                                                                                                                                                                                                                                                                                                                                                                                                                                                                                                                                                                                                                                                                                                                                                                                                                                                                                                                                                                                                                                                                                                                                                                                                                                                                                                                                                                                                                                                                                                                                                                                                                                                                                                                                                                               | 3.21725  | -0.44615 |          |          |   |          |          |          |   |          |         |          |   |          |         |          |   |          |         |          |   |          |         |          |   |          |          |          |   |          |          |          |   |          |          |          |   |          |         |          |   |          |          |          |   |         |         |         |   |         |         |         |   |          |          |          |   |         |          |          |   |          |          |         |   |         |         |         |   |          |          |          |   |          |          |          |   |          |          |          |   |          |          |          |   |          |          |         |   |          |         |          |   |          |         |          |   |          |         |         |   |          |         |          |   |          |          |          |
| C                                              | -1.24789                                                                                                                                                                                                                                                                                                                                                                                                                                                                                                                                                                                                                                                                                                                                                                                                                                                                                                                                                                                                                                                                                                                                                                                                                                                                                                                                                                                                                                                                                                                                                                                                                                                                                                                                                                                                                                                                                                                                                                                                                                               | -1.34269 | -0.15272 |          |          |   |          |          |          |   |          |         |          |   |          |         |          |   |          |         |          |   |          |         |          |   |          |          |          |   |          |          |          |   |          |          |          |   |          |         |          |   |          |          |          |   |         |         |         |   |         |         |         |   |          |          |          |   |         |          |          |   |          |          |         |   |         |         |         |   |          |          |          |   |          |          |          |   |          |          |          |   |          |          |          |   |          |          |         |   |          |         |          |   |          |         |          |   |          |         |         |   |          |         |          |   |          |          |          |
| C                                              | 0.45781                                                                                                                                                                                                                                                                                                                                                                                                                                                                                                                                                                                                                                                                                                                                                                                                                                                                                                                                                                                                                                                                                                                                                                                                                                                                                                                                                                                                                                                                                                                                                                                                                                                                                                                                                                                                                                                                                                                                                                                                                                                | 0.01455  | 1.03902  |          |          |   |          |          |          |   |          |         |          |   |          |         |          |   |          |         |          |   |          |         |          |   |          |          |          |   |          |          |          |   |          |          |          |   |          |         |          |   |          |          |          |   |         |         |         |   |         |         |         |   |          |          |          |   |         |          |          |   |          |          |         |   |         |         |         |   |          |          |          |   |          |          |          |   |          |          |          |   |          |          |          |   |          |          |         |   |          |         |          |   |          |         |          |   |          |         |         |   |          |         |          |   |          |          |          |
| O                                              | 1.50247                                                                                                                                                                                                                                                                                                                                                                                                                                                                                                                                                                                                                                                                                                                                                                                                                                                                                                                                                                                                                                                                                                                                                                                                                                                                                                                                                                                                                                                                                                                                                                                                                                                                                                                                                                                                                                                                                                                                                                                                                                                | 0.70429  | 1.09094  |          |          |   |          |          |          |   |          |         |          |   |          |         |          |   |          |         |          |   |          |         |          |   |          |          |          |   |          |          |          |   |          |          |          |   |          |         |          |   |          |          |          |   |         |         |         |   |         |         |         |   |          |          |          |   |         |          |          |   |          |          |         |   |         |         |         |   |          |          |          |   |          |          |          |   |          |          |          |   |          |          |          |   |          |          |         |   |          |         |          |   |          |         |          |   |          |         |         |   |          |         |          |   |          |          |          |
| C                                              | -0.09762                                                                                                                                                                                                                                                                                                                                                                                                                                                                                                                                                                                                                                                                                                                                                                                                                                                                                                                                                                                                                                                                                                                                                                                                                                                                                                                                                                                                                                                                                                                                                                                                                                                                                                                                                                                                                                                                                                                                                                                                                                               | -0.56429 | -0.13610 |          |          |   |          |          |          |   |          |         |          |   |          |         |          |   |          |         |          |   |          |         |          |   |          |          |          |   |          |          |          |   |          |          |          |   |          |         |          |   |          |          |          |   |         |         |         |   |         |         |         |   |          |          |          |   |         |          |          |   |          |          |         |   |         |         |         |   |          |          |          |   |          |          |          |   |          |          |          |   |          |          |          |   |          |          |         |   |          |         |          |   |          |         |          |   |          |         |         |   |          |         |          |   |          |          |          |
| H                                              | 0.40750                                                                                                                                                                                                                                                                                                                                                                                                                                                                                                                                                                                                                                                                                                                                                                                                                                                                                                                                                                                                                                                                                                                                                                                                                                                                                                                                                                                                                                                                                                                                                                                                                                                                                                                                                                                                                                                                                                                                                                                                                                                | -0.30733 | -1.06312 |          |          |   |          |          |          |   |          |         |          |   |          |         |          |   |          |         |          |   |          |         |          |   |          |          |          |   |          |          |          |   |          |          |          |   |          |         |          |   |          |          |          |   |         |         |         |   |         |         |         |   |          |          |          |   |         |          |          |   |          |          |         |   |         |         |         |   |          |          |          |   |          |          |          |   |          |          |          |   |          |          |          |   |          |          |         |   |          |         |          |   |          |         |          |   |          |         |         |   |          |         |          |   |          |          |          |
| O                                              | -0.22260                                                                                                                                                                                                                                                                                                                                                                                                                                                                                                                                                                                                                                                                                                                                                                                                                                                                                                                                                                                                                                                                                                                                                                                                                                                                                                                                                                                                                                                                                                                                                                                                                                                                                                                                                                                                                                                                                                                                                                                                                                               | -0.24862 | 2.19180  |          |          |   |          |          |          |   |          |         |          |   |          |         |          |   |          |         |          |   |          |         |          |   |          |          |          |   |          |          |          |   |          |          |          |   |          |         |          |   |          |          |          |   |         |         |         |   |         |         |         |   |          |          |          |   |         |          |          |   |          |          |         |   |         |         |         |   |          |          |          |   |          |          |          |   |          |          |          |   |          |          |          |   |          |          |         |   |          |         |          |   |          |         |          |   |          |         |         |   |          |         |          |   |          |          |          |
| C                                              | 0.32036                                                                                                                                                                                                                                                                                                                                                                                                                                                                                                                                                                                                                                                                                                                                                                                                                                                                                                                                                                                                                                                                                                                                                                                                                                                                                                                                                                                                                                                                                                                                                                                                                                                                                                                                                                                                                                                                                                                                                                                                                                                | 0.32151  | 3.38098  |          |          |   |          |          |          |   |          |         |          |   |          |         |          |   |          |         |          |   |          |         |          |   |          |          |          |   |          |          |          |   |          |          |          |   |          |         |          |   |          |          |          |   |         |         |         |   |         |         |         |   |          |          |          |   |         |          |          |   |          |          |         |   |         |         |         |   |          |          |          |   |          |          |          |   |          |          |          |   |          |          |          |   |          |          |         |   |          |         |          |   |          |         |          |   |          |         |         |   |          |         |          |   |          |          |          |
| C                                              | -1.55666                                                                                                                                                                                                                                                                                                                                                                                                                                                                                                                                                                                                                                                                                                                                                                                                                                                                                                                                                                                                                                                                                                                                                                                                                                                                                                                                                                                                                                                                                                                                                                                                                                                                                                                                                                                                                                                                                                                                                                                                                                               | -2.21724 | -1.34115 |          |          |   |          |          |          |   |          |         |          |   |          |         |          |   |          |         |          |   |          |         |          |   |          |          |          |   |          |          |          |   |          |          |          |   |          |         |          |   |          |          |          |   |         |         |         |   |         |         |         |   |          |          |          |   |         |          |          |   |          |          |         |   |         |         |         |   |          |          |          |   |          |          |          |   |          |          |          |   |          |          |          |   |          |          |         |   |          |         |          |   |          |         |          |   |          |         |         |   |          |         |          |   |          |          |          |
| H                                              | -0.92090                                                                                                                                                                                                                                                                                                                                                                                                                                                                                                                                                                                                                                                                                                                                                                                                                                                                                                                                                                                                                                                                                                                                                                                                                                                                                                                                                                                                                                                                                                                                                                                                                                                                                                                                                                                                                                                                                                                                                                                                                                               | -3.11323 | -1.30393 |          |          |   |          |          |          |   |          |         |          |   |          |         |          |   |          |         |          |   |          |         |          |   |          |          |          |   |          |          |          |   |          |          |          |   |          |         |          |   |          |          |          |   |         |         |         |   |         |         |         |   |          |          |          |   |         |          |          |   |          |          |         |   |         |         |         |   |          |          |          |   |          |          |          |   |          |          |          |   |          |          |          |   |          |          |         |   |          |         |          |   |          |         |          |   |          |         |         |   |          |         |          |   |          |          |          |
| H                                              | -1.34461                                                                                                                                                                                                                                                                                                                                                                                                                                                                                                                                                                                                                                                                                                                                                                                                                                                                                                                                                                                                                                                                                                                                                                                                                                                                                                                                                                                                                                                                                                                                                                                                                                                                                                                                                                                                                                                                                                                                                                                                                                               | -1.69528 | -2.27960 |          |          |   |          |          |          |   |          |         |          |   |          |         |          |   |          |         |          |   |          |         |          |   |          |          |          |   |          |          |          |   |          |          |          |   |          |         |          |   |          |          |          |   |         |         |         |   |         |         |         |   |          |          |          |   |         |          |          |   |          |          |         |   |         |         |         |   |          |          |          |   |          |          |          |   |          |          |          |   |          |          |          |   |          |          |         |   |          |         |          |   |          |         |          |   |          |         |         |   |          |         |          |   |          |          |          |
| H                                              | -2.60019                                                                                                                                                                                                                                                                                                                                                                                                                                                                                                                                                                                                                                                                                                                                                                                                                                                                                                                                                                                                                                                                                                                                                                                                                                                                                                                                                                                                                                                                                                                                                                                                                                                                                                                                                                                                                                                                                                                                                                                                                                               | -2.53989 | -1.35220 |          |          |   |          |          |          |   |          |         |          |   |          |         |          |   |          |         |          |   |          |         |          |   |          |          |          |   |          |          |          |   |          |          |          |   |          |         |          |   |          |          |          |   |         |         |         |   |         |         |         |   |          |          |          |   |         |          |          |   |          |          |         |   |         |         |         |   |          |          |          |   |          |          |          |   |          |          |          |   |          |          |          |   |          |          |         |   |          |         |          |   |          |         |          |   |          |         |         |   |          |         |          |   |          |          |          |
| H                                              | -1.61292                                                                                                                                                                                                                                                                                                                                                                                                                                                                                                                                                                                                                                                                                                                                                                                                                                                                                                                                                                                                                                                                                                                                                                                                                                                                                                                                                                                                                                                                                                                                                                                                                                                                                                                                                                                                                                                                                                                                                                                                                                               | -1.69887 | 0.80429  |          |          |   |          |          |          |   |          |         |          |   |          |         |          |   |          |         |          |   |          |         |          |   |          |          |          |   |          |          |          |   |          |          |          |   |          |         |          |   |          |          |          |   |         |         |         |   |         |         |         |   |          |          |          |   |         |          |          |   |          |          |         |   |         |         |         |   |          |          |          |   |          |          |          |   |          |          |          |   |          |          |          |   |          |          |         |   |          |         |          |   |          |         |          |   |          |         |         |   |          |         |          |   |          |          |          |
| H                                              | -1.85453                                                                                                                                                                                                                                                                                                                                                                                                                                                                                                                                                                                                                                                                                                                                                                                                                                                                                                                                                                                                                                                                                                                                                                                                                                                                                                                                                                                                                                                                                                                                                                                                                                                                                                                                                                                                                                                                                                                                                                                                                                               | 1.72107  | -0.42247 |          |          |   |          |          |          |   |          |         |          |   |          |         |          |   |          |         |          |   |          |         |          |   |          |          |          |   |          |          |          |   |          |          |          |   |          |         |          |   |          |          |          |   |         |         |         |   |         |         |         |   |          |          |          |   |         |          |          |   |          |          |         |   |         |         |         |   |          |          |          |   |          |          |          |   |          |          |          |   |          |          |          |   |          |          |         |   |          |         |          |   |          |         |          |   |          |         |         |   |          |         |          |   |          |          |          |
| H                                              | -5.16631                                                                                                                                                                                                                                                                                                                                                                                                                                                                                                                                                                                                                                                                                                                                                                                                                                                                                                                                                                                                                                                                                                                                                                                                                                                                                                                                                                                                                                                                                                                                                                                                                                                                                                                                                                                                                                                                                                                                                                                                                                               | 3.39877  | -1.32495 |          |          |   |          |          |          |   |          |         |          |   |          |         |          |   |          |         |          |   |          |         |          |   |          |          |          |   |          |          |          |   |          |          |          |   |          |         |          |   |          |          |          |   |         |         |         |   |         |         |         |   |          |          |          |   |         |          |          |   |          |          |         |   |         |         |         |   |          |          |          |   |          |          |          |   |          |          |          |   |          |          |          |   |          |          |         |   |          |         |          |   |          |         |          |   |          |         |         |   |          |         |          |   |          |          |          |
| H                                              | -5.12111                                                                                                                                                                                                                                                                                                                                                                                                                                                                                                                                                                                                                                                                                                                                                                                                                                                                                                                                                                                                                                                                                                                                                                                                                                                                                                                                                                                                                                                                                                                                                                                                                                                                                                                                                                                                                                                                                                                                                                                                                                               | 3.50567  | 0.43545  |          |          |   |          |          |          |   |          |         |          |   |          |         |          |   |          |         |          |   |          |         |          |   |          |          |          |   |          |          |          |   |          |          |          |   |          |         |          |   |          |          |          |   |         |         |         |   |         |         |         |   |          |          |          |   |         |          |          |   |          |          |         |   |         |         |         |   |          |          |          |   |          |          |          |   |          |          |          |   |          |          |          |   |          |          |         |   |          |         |          |   |          |         |          |   |          |         |         |   |          |         |          |   |          |          |          |
| H                                              | -3.66877                                                                                                                                                                                                                                                                                                                                                                                                                                                                                                                                                                                                                                                                                                                                                                                                                                                                                                                                                                                                                                                                                                                                                                                                                                                                                                                                                                                                                                                                                                                                                                                                                                                                                                                                                                                                                                                                                                                                                                                                                                               | 3.88502  | -0.50916 |          |          |   |          |          |          |   |          |         |          |   |          |         |          |   |          |         |          |   |          |         |          |   |          |          |          |   |          |          |          |   |          |          |          |   |          |         |          |   |          |          |          |   |         |         |         |   |         |         |         |   |          |          |          |   |         |          |          |   |          |          |         |   |         |         |         |   |          |          |          |   |          |          |          |   |          |          |          |   |          |          |          |   |          |          |         |   |          |         |          |   |          |         |          |   |          |         |         |   |          |         |          |   |          |          |          |
| H                                              | -4.71593                                                                                                                                                                                                                                                                                                                                                                                                                                                                                                                                                                                                                                                                                                                                                                                                                                                                                                                                                                                                                                                                                                                                                                                                                                                                                                                                                                                                                                                                                                                                                                                                                                                                                                                                                                                                                                                                                                                                                                                                                                               | -1.36037 | -0.16667 |          |          |   |          |          |          |   |          |         |          |   |          |         |          |   |          |         |          |   |          |         |          |   |          |          |          |   |          |          |          |   |          |          |          |   |          |         |          |   |          |          |          |   |         |         |         |   |         |         |         |   |          |          |          |   |         |          |          |   |          |          |         |   |         |         |         |   |          |          |          |   |          |          |          |   |          |          |          |   |          |          |          |   |          |          |         |   |          |         |          |   |          |         |          |   |          |         |         |   |          |         |          |   |          |          |          |

|   |          |          |          |
|---|----------|----------|----------|
| H | -9.86660 | -0.54544 | -1.00738 |
| H | -0.36412 | 0.03324  | 4.18144  |
| H | 1.32447  | -0.06500 | 3.58558  |
| H | -9.58483 | -1.98923 | 0.00933  |
| H | 0.37745  | 1.41152  | 3.30667  |
| H | -9.84803 | -0.37899 | 0.74636  |
| H | -6.05984 | 0.73250  | -0.25857 |
| C | 4.13226  | -1.73229 | -0.23019 |
| O | 4.99325  | -2.21343 | -0.98134 |
| N | 4.02226  | -0.40479 | 0.01853  |
| C | 4.72780  | 0.61284  | -0.77031 |
| C | 6.18196  | 0.82091  | -0.28051 |
| O | 6.56003  | 1.87727  | 0.22403  |
| O | 2.63730  | 1.81598  | -1.22783 |
| N | 6.99074  | -0.25223 | -0.49426 |
| C | 8.36313  | -0.28787 | -0.03506 |
| H | 2.08217  | 1.48812  | -0.48859 |
| H | 4.76332  | 0.25680  | -1.80811 |
| H | 3.20606  | -0.08563 | 0.54383  |
| H | 8.49377  | -0.98281 | 0.80618  |
| H | 6.53522  | -1.10346 | -0.82771 |
| H | 9.03844  | -0.59510 | -0.84324 |
| H | 8.63120  | 0.71764  | 0.29467  |
| C | 3.95091  | 1.93993  | -0.72520 |
| H | 3.96430  | 2.32895  | 0.30194  |
| H | 4.48665  | 2.66443  | -1.34614 |
| C | 3.12282  | -2.61267 | 0.48988  |
| H | 3.15027  | -2.43484 | 1.57103  |
| H | 3.36072  | -3.65829 | 0.28829  |
| H | 2.10410  | -2.39298 | 0.14871  |

Optimized Molecular Properties for **T8-INT1**

|                                                |                                                                                                                                                                                                                                                                                                                                                                                                                                                                                                                                                                                                                                                                                                                           |                         |                   |
|------------------------------------------------|---------------------------------------------------------------------------------------------------------------------------------------------------------------------------------------------------------------------------------------------------------------------------------------------------------------------------------------------------------------------------------------------------------------------------------------------------------------------------------------------------------------------------------------------------------------------------------------------------------------------------------------------------------------------------------------------------------------------------|-------------------------|-------------------|
| Number of<br>(-)<br>Vibrational<br>Frequencies | 0                                                                                                                                                                                                                                                                                                                                                                                                                                                                                                                                                                                                                                                                                                                         |                         |                   |
| Absolute<br>Energies<br>(Hartrees)             | <p><b>B3LYP/6-31G(d)</b></p> <p>There are 15 positive frequencies below 100 cm<sup>-1</sup>.</p> <p>Zero-point correction: 0.470684 hartree<br/>         Enthalpy correction: 0.505713 hartree<br/>         Free Energy correction: 0.395650 hartree<br/>         Quasiharmonic Free Energy correction: 0.410118 hartree</p> <p>SCF Energy: -1410.977806 hartree<br/>         SCF Energy + ZPVE: -1410.507122 hartree<br/>         Enthalpy: -1410.472093 hartree<br/>         Free Energy: -1410.582156 hartree</p> <p>Free Energy with quasiharmonic correction: -1410.567688 hartree<br/>         (correction: 9.08 kcal/mol)</p> <p><b>B3LYP-D3/6-311+G(d,p)</b></p> <p>SCF Done: E(RB3LYP) = -1411.48723457 A.U.</p> |                         |                   |
| Cartesian<br>Coordinates                       | 57<br>spD3-INT1-T8.out                                                                                                                                                                                                                                                                                                                                                                                                                                                                                                                                                                                                                                                                                                    | Energy: -885721.6050653 |                   |
|                                                | C                                                                                                                                                                                                                                                                                                                                                                                                                                                                                                                                                                                                                                                                                                                         | -7.78447                | -0.83622 0.20429  |
|                                                | O                                                                                                                                                                                                                                                                                                                                                                                                                                                                                                                                                                                                                                                                                                                         | -6.96872                | -1.73655 0.33596  |
|                                                | O                                                                                                                                                                                                                                                                                                                                                                                                                                                                                                                                                                                                                                                                                                                         | -7.49793                | 0.42455 -0.08731  |
|                                                | C                                                                                                                                                                                                                                                                                                                                                                                                                                                                                                                                                                                                                                                                                                                         | -4.01726                | 1.78421 -0.65795  |
|                                                | C                                                                                                                                                                                                                                                                                                                                                                                                                                                                                                                                                                                                                                                                                                                         | -2.72226                | 1.32233 -0.64030  |
|                                                | N                                                                                                                                                                                                                                                                                                                                                                                                                                                                                                                                                                                                                                                                                                                         | -4.86667                | 0.73872 -0.35282  |
|                                                | C                                                                                                                                                                                                                                                                                                                                                                                                                                                                                                                                                                                                                                                                                                                         | -4.08865                | -0.31957 -0.16029 |
|                                                | N                                                                                                                                                                                                                                                                                                                                                                                                                                                                                                                                                                                                                                                                                                                         | -2.78029                | -0.01703 -0.32607 |
|                                                | C                                                                                                                                                                                                                                                                                                                                                                                                                                                                                                                                                                                                                                                                                                                         | -9.28102                | -1.05227 0.36456  |
|                                                | C                                                                                                                                                                                                                                                                                                                                                                                                                                                                                                                                                                                                                                                                                                                         | -4.52318                | 3.16446 -0.94127  |
|                                                | C                                                                                                                                                                                                                                                                                                                                                                                                                                                                                                                                                                                                                                                                                                                         | -1.60155                | -0.97152 -0.18139 |
|                                                | C                                                                                                                                                                                                                                                                                                                                                                                                                                                                                                                                                                                                                                                                                                                         | 0.41022                 | 0.19059 0.83020   |
|                                                | O                                                                                                                                                                                                                                                                                                                                                                                                                                                                                                                                                                                                                                                                                                                         | 1.54557                 | 0.77174 0.84581   |
|                                                | C                                                                                                                                                                                                                                                                                                                                                                                                                                                                                                                                                                                                                                                                                                                         | -0.28164                | -0.29407 -0.26077 |
|                                                | H                                                                                                                                                                                                                                                                                                                                                                                                                                                                                                                                                                                                                                                                                                                         | 0.16031                 | -0.12732 -1.23893 |
|                                                | O                                                                                                                                                                                                                                                                                                                                                                                                                                                                                                                                                                                                                                                                                                                         | -0.22066                | -0.00130 2.06197  |
|                                                | C                                                                                                                                                                                                                                                                                                                                                                                                                                                                                                                                                                                                                                                                                                                         | 0.50696                 | 0.43704 3.19655   |
|                                                | C                                                                                                                                                                                                                                                                                                                                                                                                                                                                                                                                                                                                                                                                                                                         | -1.75911                | -2.06990 -1.24473 |
|                                                | H                                                                                                                                                                                                                                                                                                                                                                                                                                                                                                                                                                                                                                                                                                                         | -0.99585                | -2.83839 -1.08604 |
|                                                | H                                                                                                                                                                                                                                                                                                                                                                                                                                                                                                                                                                                                                                                                                                                         | -1.61725                | -1.65145 -2.24824 |
|                                                | H                                                                                                                                                                                                                                                                                                                                                                                                                                                                                                                                                                                                                                                                                                                         | -2.74618                | -2.54618 -1.21240 |
|                                                | H                                                                                                                                                                                                                                                                                                                                                                                                                                                                                                                                                                                                                                                                                                                         | -1.73279                | -1.40544 0.81436  |
|                                                | H                                                                                                                                                                                                                                                                                                                                                                                                                                                                                                                                                                                                                                                                                                                         | -1.77192                | 1.80710 -0.79867  |
|                                                | H                                                                                                                                                                                                                                                                                                                                                                                                                                                                                                                                                                                                                                                                                                                         | -5.19977                | 3.17802 -1.80591  |
|                                                | H                                                                                                                                                                                                                                                                                                                                                                                                                                                                                                                                                                                                                                                                                                                         | -5.08262                | 3.57197 -0.08909  |
|                                                | H                                                                                                                                                                                                                                                                                                                                                                                                                                                                                                                                                                                                                                                                                                                         | -3.69157                | 3.84431 -1.15367  |
|                                                | H                                                                                                                                                                                                                                                                                                                                                                                                                                                                                                                                                                                                                                                                                                                         | -4.46139                | -1.29941 0.10196  |

|   |          |          |          |
|---|----------|----------|----------|
| H | -9.80265 | -0.75986 | -0.55336 |
| H | -0.14971 | 0.26348  | 4.05503  |
| H | 1.44009  | -0.12505 | 3.33052  |
| H | -9.48399 | -2.10069 | 0.58957  |
| H | 0.76231  | 1.50013  | 3.13203  |
| H | -9.66575 | -0.41806 | 1.17094  |
| H | -6.47364 | 0.55271  | -0.19126 |
| C | 3.96614  | -1.70171 | -0.57881 |
| O | 4.88981  | -2.15122 | -1.28081 |
| N | 3.91458  | -0.42464 | -0.14330 |
| C | 4.79738  | 0.62863  | -0.65814 |
| C | 6.18548  | 0.62335  | 0.02795  |
| O | 6.59279  | 1.56793  | 0.70408  |
| O | 2.87774  | 2.07312  | -1.16074 |
| N | 6.91507  | -0.49904 | -0.22136 |
| C | 8.20500  | -0.73060 | 0.39027  |
| H | 2.21941  | 1.65538  | -0.55395 |
| H | 4.95089  | 0.43406  | -1.72830 |
| H | 3.05489  | -0.10496 | 0.32873  |
| H | 8.16624  | -1.54100 | 1.13208  |
| H | 6.43382  | -1.24878 | -0.72443 |
| H | 8.95812  | -0.99288 | -0.36412 |
| H | 8.50583  | 0.19134  | 0.89197  |
| C | 4.11733  | 2.00112  | -0.49442 |
| H | 4.02126  | 2.22480  | 0.57681  |
| H | 4.78386  | 2.75819  | -0.92101 |
| C | 2.82545  | -2.59513 | -0.11591 |
| H | 2.99399  | -2.90356 | 0.92361  |
| H | 2.81109  | -3.48993 | -0.74196 |
| H | 1.85625  | -2.08509 | -0.16216 |

Optimized Molecular Properties for **T8-INT2**

|                                                |                                                                                                                                                                                                                                                                                                                                                                                                                                                                                                                                                                                                                                                                                                                           |                          |                   |
|------------------------------------------------|---------------------------------------------------------------------------------------------------------------------------------------------------------------------------------------------------------------------------------------------------------------------------------------------------------------------------------------------------------------------------------------------------------------------------------------------------------------------------------------------------------------------------------------------------------------------------------------------------------------------------------------------------------------------------------------------------------------------------|--------------------------|-------------------|
| Number of<br>(-)<br>Vibrational<br>Frequencies | 0                                                                                                                                                                                                                                                                                                                                                                                                                                                                                                                                                                                                                                                                                                                         |                          |                   |
| Absolute<br>Energies<br>(Hartrees)             | <p><b>B3LYP/6-31G(d)</b></p> <p>There are 21 positive frequencies below 100 cm<sup>-1</sup>.</p> <p>Zero-point correction: 0.639950 hartree<br/>         Enthalpy correction: 0.685530 hartree<br/>         Free Energy correction: 0.554755 hartree<br/>         Quasiharmonic Free Energy correction: 0.569222 hartree</p> <p>SCF Energy: -1872.297699 hartree<br/>         SCF Energy + ZPVE: -1871.657749 hartree<br/>         Enthalpy: -1871.612169 hartree<br/>         Free Energy: -1871.742944 hartree</p> <p>Free Energy with quasiharmonic correction: -1871.728477 hartree<br/>         (correction: 9.08 kcal/mol)</p> <p><b>B3LYP-D3/6-311+G(d,p)</b></p> <p>SCF Done: E(RB3LYP) = -1872.97813800 A.U.</p> |                          |                   |
| Cartesian<br>Coordinates                       | 77<br>spD3-INT2-T8.out                                                                                                                                                                                                                                                                                                                                                                                                                                                                                                                                                                                                                                                                                                    | Energy: -1175311.5168250 |                   |
|                                                | C                                                                                                                                                                                                                                                                                                                                                                                                                                                                                                                                                                                                                                                                                                                         | -6.79722                 | -0.48959 -1.69340 |
|                                                | C                                                                                                                                                                                                                                                                                                                                                                                                                                                                                                                                                                                                                                                                                                                         | 3.74426                  | -0.44348 -2.22165 |
|                                                | O                                                                                                                                                                                                                                                                                                                                                                                                                                                                                                                                                                                                                                                                                                                         | -6.26071                 | 0.58506 -1.46909  |
|                                                | O                                                                                                                                                                                                                                                                                                                                                                                                                                                                                                                                                                                                                                                                                                                         | 4.84795                  | -0.93167 -2.51772 |
|                                                | N                                                                                                                                                                                                                                                                                                                                                                                                                                                                                                                                                                                                                                                                                                                         | 3.05350                  | -0.79887 -1.11562 |
|                                                | O                                                                                                                                                                                                                                                                                                                                                                                                                                                                                                                                                                                                                                                                                                                         | -6.38482                 | -1.66359 -1.23327 |
|                                                | C                                                                                                                                                                                                                                                                                                                                                                                                                                                                                                                                                                                                                                                                                                                         | -3.33043                 | -2.13873 0.99195  |
|                                                | C                                                                                                                                                                                                                                                                                                                                                                                                                                                                                                                                                                                                                                                                                                                         | 3.60019                  | -1.69400 -0.09068 |
|                                                | C                                                                                                                                                                                                                                                                                                                                                                                                                                                                                                                                                                                                                                                                                                                         | -2.36438                 | -1.35756 1.57740  |
|                                                | C                                                                                                                                                                                                                                                                                                                                                                                                                                                                                                                                                                                                                                                                                                                         | 3.41326                  | -3.17639 -0.49612 |
|                                                | N                                                                                                                                                                                                                                                                                                                                                                                                                                                                                                                                                                                                                                                                                                                         | -4.18797                 | -1.33022 0.26779  |
|                                                | O                                                                                                                                                                                                                                                                                                                                                                                                                                                                                                                                                                                                                                                                                                                         | 2.65489                  | -3.94172 0.09482  |
|                                                | C                                                                                                                                                                                                                                                                                                                                                                                                                                                                                                                                                                                                                                                                                                                         | -3.74258                 | -0.09241 0.41555  |
|                                                | O                                                                                                                                                                                                                                                                                                                                                                                                                                                                                                                                                                                                                                                                                                                         | 3.44647                  | -0.16890 1.78676  |
|                                                | N                                                                                                                                                                                                                                                                                                                                                                                                                                                                                                                                                                                                                                                                                                                         | -2.63903                 | -0.05334 1.20021  |
|                                                | N                                                                                                                                                                                                                                                                                                                                                                                                                                                                                                                                                                                                                                                                                                                         | 4.19056                  | -3.54529 -1.55568 |
|                                                | C                                                                                                                                                                                                                                                                                                                                                                                                                                                                                                                                                                                                                                                                                                                         | -8.04223                 | -0.62704 -2.55327 |
|                                                | C                                                                                                                                                                                                                                                                                                                                                                                                                                                                                                                                                                                                                                                                                                                         | 4.08224                  | -4.85119 -2.16917 |
|                                                | C                                                                                                                                                                                                                                                                                                                                                                                                                                                                                                                                                                                                                                                                                                                         | -3.50792                 | -3.62298 1.06159  |
|                                                | H                                                                                                                                                                                                                                                                                                                                                                                                                                                                                                                                                                                                                                                                                                                         | 2.66486                  | 0.42491 2.00424   |
|                                                | C                                                                                                                                                                                                                                                                                                                                                                                                                                                                                                                                                                                                                                                                                                                         | -1.87627                 | 1.14908 1.60155   |
|                                                | H                                                                                                                                                                                                                                                                                                                                                                                                                                                                                                                                                                                                                                                                                                                         | 4.67606                  | -1.48984 -0.03782 |
|                                                | C                                                                                                                                                                                                                                                                                                                                                                                                                                                                                                                                                                                                                                                                                                                         | -0.46542                 | 1.11975 -0.50878  |
|                                                | H                                                                                                                                                                                                                                                                                                                                                                                                                                                                                                                                                                                                                                                                                                                         | 2.13893                  | -0.38014 -0.95352 |
|                                                | O                                                                                                                                                                                                                                                                                                                                                                                                                                                                                                                                                                                                                                                                                                                         | 0.33058                  | 0.53346 -1.22704  |
|                                                | H                                                                                                                                                                                                                                                                                                                                                                                                                                                                                                                                                                                                                                                                                                                         | 3.58746                  | -4.80509 -3.14999 |
|                                                | C                                                                                                                                                                                                                                                                                                                                                                                                                                                                                                                                                                                                                                                                                                                         | -0.45395                 | 1.07081 0.99262   |



|   |          |          |          |
|---|----------|----------|----------|
| H | 4.68807  | -2.79227 | -2.03354 |
| C | 0.62309  | 2.11429  | 1.66735  |
| H | 5.07250  | -5.30424 | -2.30492 |
| C | 1.33232  | 2.99109  | 0.61486  |
| H | 3.48626  | -5.48154 | -1.50620 |
| C | 2.99238  | -1.40531 | 1.28788  |
| O | 1.45613  | 1.44582  | 2.49167  |
| C | 2.66559  | 2.76267  | 0.25450  |
| H | 1.89674  | -1.45752 | 1.23534  |
| C | 0.66988  | 4.09023  | 0.04852  |
| H | 3.29993  | -2.22554 | 1.95180  |
| C | 3.30880  | 3.60399  | -0.65731 |
| C | 3.09947  | 0.61738  | -3.09720 |
| C | 1.30671  | 4.92848  | -0.86828 |
| H | 2.03019  | 0.72863  | -2.90632 |
| C | 2.63554  | 4.68773  | -1.22540 |
| H | 3.27712  | 0.36114  | -4.14550 |
| H | -0.02328 | 0.10185  | 1.24506  |
| H | 3.58045  | 1.58162  | -2.89790 |
| O | -1.42402 | 1.92623  | -1.02324 |
| C | -1.41311 | 2.08129  | -2.44886 |
| C | -1.93857 | 1.28892  | 3.13058  |
| H | 0.77189  | 5.77791  | -1.28939 |
| H | 3.14256  | 5.34354  | -1.93016 |
| H | 4.34844  | 3.41456  | -0.91745 |
| H | 3.19680  | 1.92462  | 0.69259  |
| H | -0.35947 | 4.29677  | 0.33731  |
| H | -1.53647 | 2.25519  | 3.44559  |
| H | -1.36284 | 0.50471  | 3.62929  |
| H | -2.98528 | 1.23425  | 3.45075  |
| H | -0.02757 | 2.83552  | 2.21081  |
| H | -2.40951 | 1.98822  | 1.14644  |
| H | -1.52117 | -1.59383 | 2.21272  |
| H | -4.47921 | -3.89137 | 1.49686  |
| H | -3.46332 | -4.07745 | 0.06398  |
| H | -2.72275 | -4.07712 | 1.67369  |
| H | -4.19417 | 0.77872  | -0.03696 |
| H | -8.84826 | -1.09050 | -1.97391 |
| H | -2.29234 | 2.68307  | -2.68362 |
| H | -0.50082 | 2.59470  | -2.76483 |
| H | -8.35836 | 0.35455  | -2.91009 |
| H | -1.47232 | 1.10820  | -2.94254 |
| H | -7.83733 | -1.28459 | -3.40524 |
| O | 0.50464  | -0.72880 | 3.61501  |
| H | 0.83920  | 0.15569  | 3.24892  |
| C | 1.43718  | -1.17060 | 4.57651  |
| H | 1.25086  | -2.23254 | 4.78346  |
| H | 1.35147  | -0.62347 | 5.53301  |
| H | 2.47208  | -1.06479 | 4.22031  |
| H | -5.53851 | -1.54815 | -0.65653 |

Optimized Molecular Properties for **T8-TS3**

|                                                |                                                                                                                                                                                                                                                                                                                                                                                                                                                                                                                                                                                                                                                                                                                                                                                                                                                                                                                                                                                                                                                                                                                                                                                                                                                                                                                                                                                                                                                                                                                                                                                                                                                                                                                                                                                                                                                                                                                                                               |          |          |          |          |   |         |         |          |   |          |         |          |   |         |         |          |   |         |          |          |   |          |          |          |   |          |          |         |   |         |          |         |   |          |          |         |   |         |          |          |   |          |          |         |   |         |          |         |   |          |         |         |   |         |         |         |   |          |         |         |   |         |          |          |   |          |          |          |   |         |          |          |   |          |          |         |   |         |         |         |   |          |         |         |   |         |          |         |   |          |         |          |   |         |          |          |   |         |          |          |   |         |          |          |
|------------------------------------------------|---------------------------------------------------------------------------------------------------------------------------------------------------------------------------------------------------------------------------------------------------------------------------------------------------------------------------------------------------------------------------------------------------------------------------------------------------------------------------------------------------------------------------------------------------------------------------------------------------------------------------------------------------------------------------------------------------------------------------------------------------------------------------------------------------------------------------------------------------------------------------------------------------------------------------------------------------------------------------------------------------------------------------------------------------------------------------------------------------------------------------------------------------------------------------------------------------------------------------------------------------------------------------------------------------------------------------------------------------------------------------------------------------------------------------------------------------------------------------------------------------------------------------------------------------------------------------------------------------------------------------------------------------------------------------------------------------------------------------------------------------------------------------------------------------------------------------------------------------------------------------------------------------------------------------------------------------------------|----------|----------|----------|----------|---|---------|---------|----------|---|----------|---------|----------|---|---------|---------|----------|---|---------|----------|----------|---|----------|----------|----------|---|----------|----------|---------|---|---------|----------|---------|---|----------|----------|---------|---|---------|----------|----------|---|----------|----------|---------|---|---------|----------|---------|---|----------|---------|---------|---|---------|---------|---------|---|----------|---------|---------|---|---------|----------|----------|---|----------|----------|----------|---|---------|----------|----------|---|----------|----------|---------|---|---------|---------|---------|---|----------|---------|---------|---|---------|----------|---------|---|----------|---------|----------|---|---------|----------|----------|---|---------|----------|----------|---|---------|----------|----------|
| Number of<br>(-)<br>Vibrational<br>Frequencies | 2 (-1112.2814)                                                                                                                                                                                                                                                                                                                                                                                                                                                                                                                                                                                                                                                                                                                                                                                                                                                                                                                                                                                                                                                                                                                                                                                                                                                                                                                                                                                                                                                                                                                                                                                                                                                                                                                                                                                                                                                                                                                                                |          |          |          |          |   |         |         |          |   |          |         |          |   |         |         |          |   |         |          |          |   |          |          |          |   |          |          |         |   |         |          |         |   |          |          |         |   |         |          |          |   |          |          |         |   |         |          |         |   |          |         |         |   |         |         |         |   |          |         |         |   |         |          |          |   |          |          |          |   |         |          |          |   |          |          |         |   |         |         |         |   |          |         |         |   |         |          |         |   |          |         |          |   |         |          |          |   |         |          |          |   |         |          |          |
| Absolute<br>Energies<br>(Hartrees)             | <p><b>B3LYP/6-31G(d)</b></p> <p>There are 20 positive frequencies below 100 cm<sup>-1</sup>.</p> <p>Zero-point correction: 0.635351 hartree<br/>         Enthalpy correction: 0.680595 hartree<br/>         Free Energy correction: 0.549258 hartree<br/>         Quasiharmonic Free Energy correction: 0.565255 hartree</p> <p>SCF Energy: -1872.271313 hartree<br/>         SCF Energy + ZPVE: -1871.635962 hartree<br/>         Enthalpy: -1871.590718 hartree<br/>         Free Energy: -1871.722055 hartree</p> <p>Free Energy with quasiharmonic correction: -1871.706058 hartree<br/>         (correction: 10.04 kcal/mol)</p> <p><b>B3LYP-D3/6-311+G(d,p)</b></p> <p>SCF Done: E(RB3LYP) = -1872.95342301 A.U.</p>                                                                                                                                                                                                                                                                                                                                                                                                                                                                                                                                                                                                                                                                                                                                                                                                                                                                                                                                                                                                                                                                                                                                                                                                                                    |          |          |          |          |   |         |         |          |   |          |         |          |   |         |         |          |   |         |          |          |   |          |          |          |   |          |          |         |   |         |          |         |   |          |          |         |   |         |          |          |   |          |          |         |   |         |          |         |   |          |         |         |   |         |         |         |   |          |         |         |   |         |          |          |   |          |          |          |   |         |          |          |   |          |          |         |   |         |         |         |   |          |         |         |   |         |          |         |   |          |         |          |   |         |          |          |   |         |          |          |   |         |          |          |
| Cartesian<br>Coordinates                       | <p>77</p> <p>spD3-TS3-T8.out Energy: -1175296.0079347</p> <table> <tr><td>C</td><td>-7.09962</td><td>-0.75950</td><td>-2.23093</td></tr> <tr><td>C</td><td>4.28394</td><td>0.10307</td><td>-1.80143</td></tr> <tr><td>O</td><td>-6.31162</td><td>0.14644</td><td>-2.45751</td></tr> <tr><td>O</td><td>5.47750</td><td>0.02052</td><td>-2.14046</td></tr> <tr><td>N</td><td>3.78908</td><td>-0.48887</td><td>-0.69236</td></tr> <tr><td>O</td><td>-7.05780</td><td>-1.56861</td><td>-1.18104</td></tr> <tr><td>C</td><td>-4.49675</td><td>-1.36312</td><td>1.60512</td></tr> <tr><td>C</td><td>4.63782</td><td>-1.15779</td><td>0.29591</td></tr> <tr><td>C</td><td>-3.39113</td><td>-0.61591</td><td>1.93190</td></tr> <tr><td>C</td><td>5.00096</td><td>-2.59874</td><td>-0.14109</td></tr> <tr><td>N</td><td>-4.99680</td><td>-0.92691</td><td>0.39149</td></tr> <tr><td>O</td><td>4.60746</td><td>-3.59356</td><td>0.46572</td></tr> <tr><td>C</td><td>-4.20240</td><td>0.05758</td><td>0.00133</td></tr> <tr><td>O</td><td>3.81825</td><td>0.14080</td><td>2.19585</td></tr> <tr><td>N</td><td>-3.21104</td><td>0.28301</td><td>0.89444</td></tr> <tr><td>N</td><td>5.81496</td><td>-2.64660</td><td>-1.23253</td></tr> <tr><td>C</td><td>-8.26469</td><td>-1.08794</td><td>-3.15015</td></tr> <tr><td>C</td><td>6.18980</td><td>-3.89618</td><td>-1.85843</td></tr> <tr><td>C</td><td>-5.12717</td><td>-2.48910</td><td>2.36355</td></tr> <tr><td>H</td><td>2.88592</td><td>0.43305</td><td>2.09282</td></tr> <tr><td>C</td><td>-2.21578</td><td>1.38519</td><td>0.80910</td></tr> <tr><td>H</td><td>5.56771</td><td>-0.57951</td><td>0.36496</td></tr> <tr><td>C</td><td>-0.27096</td><td>0.12893</td><td>-0.23311</td></tr> <tr><td>H</td><td>2.80002</td><td>-0.36678</td><td>-0.47247</td></tr> <tr><td>O</td><td>0.89583</td><td>-0.19860</td><td>-0.45773</td></tr> <tr><td>H</td><td>5.69510</td><td>-4.03165</td><td>-2.83069</td></tr> </table> | C        | -7.09962 | -0.75950 | -2.23093 | C | 4.28394 | 0.10307 | -1.80143 | O | -6.31162 | 0.14644 | -2.45751 | O | 5.47750 | 0.02052 | -2.14046 | N | 3.78908 | -0.48887 | -0.69236 | O | -7.05780 | -1.56861 | -1.18104 | C | -4.49675 | -1.36312 | 1.60512 | C | 4.63782 | -1.15779 | 0.29591 | C | -3.39113 | -0.61591 | 1.93190 | C | 5.00096 | -2.59874 | -0.14109 | N | -4.99680 | -0.92691 | 0.39149 | O | 4.60746 | -3.59356 | 0.46572 | C | -4.20240 | 0.05758 | 0.00133 | O | 3.81825 | 0.14080 | 2.19585 | N | -3.21104 | 0.28301 | 0.89444 | N | 5.81496 | -2.64660 | -1.23253 | C | -8.26469 | -1.08794 | -3.15015 | C | 6.18980 | -3.89618 | -1.85843 | C | -5.12717 | -2.48910 | 2.36355 | H | 2.88592 | 0.43305 | 2.09282 | C | -2.21578 | 1.38519 | 0.80910 | H | 5.56771 | -0.57951 | 0.36496 | C | -0.27096 | 0.12893 | -0.23311 | H | 2.80002 | -0.36678 | -0.47247 | O | 0.89583 | -0.19860 | -0.45773 | H | 5.69510 | -4.03165 | -2.83069 |
| C                                              | -7.09962                                                                                                                                                                                                                                                                                                                                                                                                                                                                                                                                                                                                                                                                                                                                                                                                                                                                                                                                                                                                                                                                                                                                                                                                                                                                                                                                                                                                                                                                                                                                                                                                                                                                                                                                                                                                                                                                                                                                                      | -0.75950 | -2.23093 |          |          |   |         |         |          |   |          |         |          |   |         |         |          |   |         |          |          |   |          |          |          |   |          |          |         |   |         |          |         |   |          |          |         |   |         |          |          |   |          |          |         |   |         |          |         |   |          |         |         |   |         |         |         |   |          |         |         |   |         |          |          |   |          |          |          |   |         |          |          |   |          |          |         |   |         |         |         |   |          |         |         |   |         |          |         |   |          |         |          |   |         |          |          |   |         |          |          |   |         |          |          |
| C                                              | 4.28394                                                                                                                                                                                                                                                                                                                                                                                                                                                                                                                                                                                                                                                                                                                                                                                                                                                                                                                                                                                                                                                                                                                                                                                                                                                                                                                                                                                                                                                                                                                                                                                                                                                                                                                                                                                                                                                                                                                                                       | 0.10307  | -1.80143 |          |          |   |         |         |          |   |          |         |          |   |         |         |          |   |         |          |          |   |          |          |          |   |          |          |         |   |         |          |         |   |          |          |         |   |         |          |          |   |          |          |         |   |         |          |         |   |          |         |         |   |         |         |         |   |          |         |         |   |         |          |          |   |          |          |          |   |         |          |          |   |          |          |         |   |         |         |         |   |          |         |         |   |         |          |         |   |          |         |          |   |         |          |          |   |         |          |          |   |         |          |          |
| O                                              | -6.31162                                                                                                                                                                                                                                                                                                                                                                                                                                                                                                                                                                                                                                                                                                                                                                                                                                                                                                                                                                                                                                                                                                                                                                                                                                                                                                                                                                                                                                                                                                                                                                                                                                                                                                                                                                                                                                                                                                                                                      | 0.14644  | -2.45751 |          |          |   |         |         |          |   |          |         |          |   |         |         |          |   |         |          |          |   |          |          |          |   |          |          |         |   |         |          |         |   |          |          |         |   |         |          |          |   |          |          |         |   |         |          |         |   |          |         |         |   |         |         |         |   |          |         |         |   |         |          |          |   |          |          |          |   |         |          |          |   |          |          |         |   |         |         |         |   |          |         |         |   |         |          |         |   |          |         |          |   |         |          |          |   |         |          |          |   |         |          |          |
| O                                              | 5.47750                                                                                                                                                                                                                                                                                                                                                                                                                                                                                                                                                                                                                                                                                                                                                                                                                                                                                                                                                                                                                                                                                                                                                                                                                                                                                                                                                                                                                                                                                                                                                                                                                                                                                                                                                                                                                                                                                                                                                       | 0.02052  | -2.14046 |          |          |   |         |         |          |   |          |         |          |   |         |         |          |   |         |          |          |   |          |          |          |   |          |          |         |   |         |          |         |   |          |          |         |   |         |          |          |   |          |          |         |   |         |          |         |   |          |         |         |   |         |         |         |   |          |         |         |   |         |          |          |   |          |          |          |   |         |          |          |   |          |          |         |   |         |         |         |   |          |         |         |   |         |          |         |   |          |         |          |   |         |          |          |   |         |          |          |   |         |          |          |
| N                                              | 3.78908                                                                                                                                                                                                                                                                                                                                                                                                                                                                                                                                                                                                                                                                                                                                                                                                                                                                                                                                                                                                                                                                                                                                                                                                                                                                                                                                                                                                                                                                                                                                                                                                                                                                                                                                                                                                                                                                                                                                                       | -0.48887 | -0.69236 |          |          |   |         |         |          |   |          |         |          |   |         |         |          |   |         |          |          |   |          |          |          |   |          |          |         |   |         |          |         |   |          |          |         |   |         |          |          |   |          |          |         |   |         |          |         |   |          |         |         |   |         |         |         |   |          |         |         |   |         |          |          |   |          |          |          |   |         |          |          |   |          |          |         |   |         |         |         |   |          |         |         |   |         |          |         |   |          |         |          |   |         |          |          |   |         |          |          |   |         |          |          |
| O                                              | -7.05780                                                                                                                                                                                                                                                                                                                                                                                                                                                                                                                                                                                                                                                                                                                                                                                                                                                                                                                                                                                                                                                                                                                                                                                                                                                                                                                                                                                                                                                                                                                                                                                                                                                                                                                                                                                                                                                                                                                                                      | -1.56861 | -1.18104 |          |          |   |         |         |          |   |          |         |          |   |         |         |          |   |         |          |          |   |          |          |          |   |          |          |         |   |         |          |         |   |          |          |         |   |         |          |          |   |          |          |         |   |         |          |         |   |          |         |         |   |         |         |         |   |          |         |         |   |         |          |          |   |          |          |          |   |         |          |          |   |          |          |         |   |         |         |         |   |          |         |         |   |         |          |         |   |          |         |          |   |         |          |          |   |         |          |          |   |         |          |          |
| C                                              | -4.49675                                                                                                                                                                                                                                                                                                                                                                                                                                                                                                                                                                                                                                                                                                                                                                                                                                                                                                                                                                                                                                                                                                                                                                                                                                                                                                                                                                                                                                                                                                                                                                                                                                                                                                                                                                                                                                                                                                                                                      | -1.36312 | 1.60512  |          |          |   |         |         |          |   |          |         |          |   |         |         |          |   |         |          |          |   |          |          |          |   |          |          |         |   |         |          |         |   |          |          |         |   |         |          |          |   |          |          |         |   |         |          |         |   |          |         |         |   |         |         |         |   |          |         |         |   |         |          |          |   |          |          |          |   |         |          |          |   |          |          |         |   |         |         |         |   |          |         |         |   |         |          |         |   |          |         |          |   |         |          |          |   |         |          |          |   |         |          |          |
| C                                              | 4.63782                                                                                                                                                                                                                                                                                                                                                                                                                                                                                                                                                                                                                                                                                                                                                                                                                                                                                                                                                                                                                                                                                                                                                                                                                                                                                                                                                                                                                                                                                                                                                                                                                                                                                                                                                                                                                                                                                                                                                       | -1.15779 | 0.29591  |          |          |   |         |         |          |   |          |         |          |   |         |         |          |   |         |          |          |   |          |          |          |   |          |          |         |   |         |          |         |   |          |          |         |   |         |          |          |   |          |          |         |   |         |          |         |   |          |         |         |   |         |         |         |   |          |         |         |   |         |          |          |   |          |          |          |   |         |          |          |   |          |          |         |   |         |         |         |   |          |         |         |   |         |          |         |   |          |         |          |   |         |          |          |   |         |          |          |   |         |          |          |
| C                                              | -3.39113                                                                                                                                                                                                                                                                                                                                                                                                                                                                                                                                                                                                                                                                                                                                                                                                                                                                                                                                                                                                                                                                                                                                                                                                                                                                                                                                                                                                                                                                                                                                                                                                                                                                                                                                                                                                                                                                                                                                                      | -0.61591 | 1.93190  |          |          |   |         |         |          |   |          |         |          |   |         |         |          |   |         |          |          |   |          |          |          |   |          |          |         |   |         |          |         |   |          |          |         |   |         |          |          |   |          |          |         |   |         |          |         |   |          |         |         |   |         |         |         |   |          |         |         |   |         |          |          |   |          |          |          |   |         |          |          |   |          |          |         |   |         |         |         |   |          |         |         |   |         |          |         |   |          |         |          |   |         |          |          |   |         |          |          |   |         |          |          |
| C                                              | 5.00096                                                                                                                                                                                                                                                                                                                                                                                                                                                                                                                                                                                                                                                                                                                                                                                                                                                                                                                                                                                                                                                                                                                                                                                                                                                                                                                                                                                                                                                                                                                                                                                                                                                                                                                                                                                                                                                                                                                                                       | -2.59874 | -0.14109 |          |          |   |         |         |          |   |          |         |          |   |         |         |          |   |         |          |          |   |          |          |          |   |          |          |         |   |         |          |         |   |          |          |         |   |         |          |          |   |          |          |         |   |         |          |         |   |          |         |         |   |         |         |         |   |          |         |         |   |         |          |          |   |          |          |          |   |         |          |          |   |          |          |         |   |         |         |         |   |          |         |         |   |         |          |         |   |          |         |          |   |         |          |          |   |         |          |          |   |         |          |          |
| N                                              | -4.99680                                                                                                                                                                                                                                                                                                                                                                                                                                                                                                                                                                                                                                                                                                                                                                                                                                                                                                                                                                                                                                                                                                                                                                                                                                                                                                                                                                                                                                                                                                                                                                                                                                                                                                                                                                                                                                                                                                                                                      | -0.92691 | 0.39149  |          |          |   |         |         |          |   |          |         |          |   |         |         |          |   |         |          |          |   |          |          |          |   |          |          |         |   |         |          |         |   |          |          |         |   |         |          |          |   |          |          |         |   |         |          |         |   |          |         |         |   |         |         |         |   |          |         |         |   |         |          |          |   |          |          |          |   |         |          |          |   |          |          |         |   |         |         |         |   |          |         |         |   |         |          |         |   |          |         |          |   |         |          |          |   |         |          |          |   |         |          |          |
| O                                              | 4.60746                                                                                                                                                                                                                                                                                                                                                                                                                                                                                                                                                                                                                                                                                                                                                                                                                                                                                                                                                                                                                                                                                                                                                                                                                                                                                                                                                                                                                                                                                                                                                                                                                                                                                                                                                                                                                                                                                                                                                       | -3.59356 | 0.46572  |          |          |   |         |         |          |   |          |         |          |   |         |         |          |   |         |          |          |   |          |          |          |   |          |          |         |   |         |          |         |   |          |          |         |   |         |          |          |   |          |          |         |   |         |          |         |   |          |         |         |   |         |         |         |   |          |         |         |   |         |          |          |   |          |          |          |   |         |          |          |   |          |          |         |   |         |         |         |   |          |         |         |   |         |          |         |   |          |         |          |   |         |          |          |   |         |          |          |   |         |          |          |
| C                                              | -4.20240                                                                                                                                                                                                                                                                                                                                                                                                                                                                                                                                                                                                                                                                                                                                                                                                                                                                                                                                                                                                                                                                                                                                                                                                                                                                                                                                                                                                                                                                                                                                                                                                                                                                                                                                                                                                                                                                                                                                                      | 0.05758  | 0.00133  |          |          |   |         |         |          |   |          |         |          |   |         |         |          |   |         |          |          |   |          |          |          |   |          |          |         |   |         |          |         |   |          |          |         |   |         |          |          |   |          |          |         |   |         |          |         |   |          |         |         |   |         |         |         |   |          |         |         |   |         |          |          |   |          |          |          |   |         |          |          |   |          |          |         |   |         |         |         |   |          |         |         |   |         |          |         |   |          |         |          |   |         |          |          |   |         |          |          |   |         |          |          |
| O                                              | 3.81825                                                                                                                                                                                                                                                                                                                                                                                                                                                                                                                                                                                                                                                                                                                                                                                                                                                                                                                                                                                                                                                                                                                                                                                                                                                                                                                                                                                                                                                                                                                                                                                                                                                                                                                                                                                                                                                                                                                                                       | 0.14080  | 2.19585  |          |          |   |         |         |          |   |          |         |          |   |         |         |          |   |         |          |          |   |          |          |          |   |          |          |         |   |         |          |         |   |          |          |         |   |         |          |          |   |          |          |         |   |         |          |         |   |          |         |         |   |         |         |         |   |          |         |         |   |         |          |          |   |          |          |          |   |         |          |          |   |          |          |         |   |         |         |         |   |          |         |         |   |         |          |         |   |          |         |          |   |         |          |          |   |         |          |          |   |         |          |          |
| N                                              | -3.21104                                                                                                                                                                                                                                                                                                                                                                                                                                                                                                                                                                                                                                                                                                                                                                                                                                                                                                                                                                                                                                                                                                                                                                                                                                                                                                                                                                                                                                                                                                                                                                                                                                                                                                                                                                                                                                                                                                                                                      | 0.28301  | 0.89444  |          |          |   |         |         |          |   |          |         |          |   |         |         |          |   |         |          |          |   |          |          |          |   |          |          |         |   |         |          |         |   |          |          |         |   |         |          |          |   |          |          |         |   |         |          |         |   |          |         |         |   |         |         |         |   |          |         |         |   |         |          |          |   |          |          |          |   |         |          |          |   |          |          |         |   |         |         |         |   |          |         |         |   |         |          |         |   |          |         |          |   |         |          |          |   |         |          |          |   |         |          |          |
| N                                              | 5.81496                                                                                                                                                                                                                                                                                                                                                                                                                                                                                                                                                                                                                                                                                                                                                                                                                                                                                                                                                                                                                                                                                                                                                                                                                                                                                                                                                                                                                                                                                                                                                                                                                                                                                                                                                                                                                                                                                                                                                       | -2.64660 | -1.23253 |          |          |   |         |         |          |   |          |         |          |   |         |         |          |   |         |          |          |   |          |          |          |   |          |          |         |   |         |          |         |   |          |          |         |   |         |          |          |   |          |          |         |   |         |          |         |   |          |         |         |   |         |         |         |   |          |         |         |   |         |          |          |   |          |          |          |   |         |          |          |   |          |          |         |   |         |         |         |   |          |         |         |   |         |          |         |   |          |         |          |   |         |          |          |   |         |          |          |   |         |          |          |
| C                                              | -8.26469                                                                                                                                                                                                                                                                                                                                                                                                                                                                                                                                                                                                                                                                                                                                                                                                                                                                                                                                                                                                                                                                                                                                                                                                                                                                                                                                                                                                                                                                                                                                                                                                                                                                                                                                                                                                                                                                                                                                                      | -1.08794 | -3.15015 |          |          |   |         |         |          |   |          |         |          |   |         |         |          |   |         |          |          |   |          |          |          |   |          |          |         |   |         |          |         |   |          |          |         |   |         |          |          |   |          |          |         |   |         |          |         |   |          |         |         |   |         |         |         |   |          |         |         |   |         |          |          |   |          |          |          |   |         |          |          |   |          |          |         |   |         |         |         |   |          |         |         |   |         |          |         |   |          |         |          |   |         |          |          |   |         |          |          |   |         |          |          |
| C                                              | 6.18980                                                                                                                                                                                                                                                                                                                                                                                                                                                                                                                                                                                                                                                                                                                                                                                                                                                                                                                                                                                                                                                                                                                                                                                                                                                                                                                                                                                                                                                                                                                                                                                                                                                                                                                                                                                                                                                                                                                                                       | -3.89618 | -1.85843 |          |          |   |         |         |          |   |          |         |          |   |         |         |          |   |         |          |          |   |          |          |          |   |          |          |         |   |         |          |         |   |          |          |         |   |         |          |          |   |          |          |         |   |         |          |         |   |          |         |         |   |         |         |         |   |          |         |         |   |         |          |          |   |          |          |          |   |         |          |          |   |          |          |         |   |         |         |         |   |          |         |         |   |         |          |         |   |          |         |          |   |         |          |          |   |         |          |          |   |         |          |          |
| C                                              | -5.12717                                                                                                                                                                                                                                                                                                                                                                                                                                                                                                                                                                                                                                                                                                                                                                                                                                                                                                                                                                                                                                                                                                                                                                                                                                                                                                                                                                                                                                                                                                                                                                                                                                                                                                                                                                                                                                                                                                                                                      | -2.48910 | 2.36355  |          |          |   |         |         |          |   |          |         |          |   |         |         |          |   |         |          |          |   |          |          |          |   |          |          |         |   |         |          |         |   |          |          |         |   |         |          |          |   |          |          |         |   |         |          |         |   |          |         |         |   |         |         |         |   |          |         |         |   |         |          |          |   |          |          |          |   |         |          |          |   |          |          |         |   |         |         |         |   |          |         |         |   |         |          |         |   |          |         |          |   |         |          |          |   |         |          |          |   |         |          |          |
| H                                              | 2.88592                                                                                                                                                                                                                                                                                                                                                                                                                                                                                                                                                                                                                                                                                                                                                                                                                                                                                                                                                                                                                                                                                                                                                                                                                                                                                                                                                                                                                                                                                                                                                                                                                                                                                                                                                                                                                                                                                                                                                       | 0.43305  | 2.09282  |          |          |   |         |         |          |   |          |         |          |   |         |         |          |   |         |          |          |   |          |          |          |   |          |          |         |   |         |          |         |   |          |          |         |   |         |          |          |   |          |          |         |   |         |          |         |   |          |         |         |   |         |         |         |   |          |         |         |   |         |          |          |   |          |          |          |   |         |          |          |   |          |          |         |   |         |         |         |   |          |         |         |   |         |          |         |   |          |         |          |   |         |          |          |   |         |          |          |   |         |          |          |
| C                                              | -2.21578                                                                                                                                                                                                                                                                                                                                                                                                                                                                                                                                                                                                                                                                                                                                                                                                                                                                                                                                                                                                                                                                                                                                                                                                                                                                                                                                                                                                                                                                                                                                                                                                                                                                                                                                                                                                                                                                                                                                                      | 1.38519  | 0.80910  |          |          |   |         |         |          |   |          |         |          |   |         |         |          |   |         |          |          |   |          |          |          |   |          |          |         |   |         |          |         |   |          |          |         |   |         |          |          |   |          |          |         |   |         |          |         |   |          |         |         |   |         |         |         |   |          |         |         |   |         |          |          |   |          |          |          |   |         |          |          |   |          |          |         |   |         |         |         |   |          |         |         |   |         |          |         |   |          |         |          |   |         |          |          |   |         |          |          |   |         |          |          |
| H                                              | 5.56771                                                                                                                                                                                                                                                                                                                                                                                                                                                                                                                                                                                                                                                                                                                                                                                                                                                                                                                                                                                                                                                                                                                                                                                                                                                                                                                                                                                                                                                                                                                                                                                                                                                                                                                                                                                                                                                                                                                                                       | -0.57951 | 0.36496  |          |          |   |         |         |          |   |          |         |          |   |         |         |          |   |         |          |          |   |          |          |          |   |          |          |         |   |         |          |         |   |          |          |         |   |         |          |          |   |          |          |         |   |         |          |         |   |          |         |         |   |         |         |         |   |          |         |         |   |         |          |          |   |          |          |          |   |         |          |          |   |          |          |         |   |         |         |         |   |          |         |         |   |         |          |         |   |          |         |          |   |         |          |          |   |         |          |          |   |         |          |          |
| C                                              | -0.27096                                                                                                                                                                                                                                                                                                                                                                                                                                                                                                                                                                                                                                                                                                                                                                                                                                                                                                                                                                                                                                                                                                                                                                                                                                                                                                                                                                                                                                                                                                                                                                                                                                                                                                                                                                                                                                                                                                                                                      | 0.12893  | -0.23311 |          |          |   |         |         |          |   |          |         |          |   |         |         |          |   |         |          |          |   |          |          |          |   |          |          |         |   |         |          |         |   |          |          |         |   |         |          |          |   |          |          |         |   |         |          |         |   |          |         |         |   |         |         |         |   |          |         |         |   |         |          |          |   |          |          |          |   |         |          |          |   |          |          |         |   |         |         |         |   |          |         |         |   |         |          |         |   |          |         |          |   |         |          |          |   |         |          |          |   |         |          |          |
| H                                              | 2.80002                                                                                                                                                                                                                                                                                                                                                                                                                                                                                                                                                                                                                                                                                                                                                                                                                                                                                                                                                                                                                                                                                                                                                                                                                                                                                                                                                                                                                                                                                                                                                                                                                                                                                                                                                                                                                                                                                                                                                       | -0.36678 | -0.47247 |          |          |   |         |         |          |   |          |         |          |   |         |         |          |   |         |          |          |   |          |          |          |   |          |          |         |   |         |          |         |   |          |          |         |   |         |          |          |   |          |          |         |   |         |          |         |   |          |         |         |   |         |         |         |   |          |         |         |   |         |          |          |   |          |          |          |   |         |          |          |   |          |          |         |   |         |         |         |   |          |         |         |   |         |          |         |   |          |         |          |   |         |          |          |   |         |          |          |   |         |          |          |
| O                                              | 0.89583                                                                                                                                                                                                                                                                                                                                                                                                                                                                                                                                                                                                                                                                                                                                                                                                                                                                                                                                                                                                                                                                                                                                                                                                                                                                                                                                                                                                                                                                                                                                                                                                                                                                                                                                                                                                                                                                                                                                                       | -0.19860 | -0.45773 |          |          |   |         |         |          |   |          |         |          |   |         |         |          |   |         |          |          |   |          |          |          |   |          |          |         |   |         |          |         |   |          |          |         |   |         |          |          |   |          |          |         |   |         |          |         |   |          |         |         |   |         |         |         |   |          |         |         |   |         |          |          |   |          |          |          |   |         |          |          |   |          |          |         |   |         |         |         |   |          |         |         |   |         |          |         |   |          |         |          |   |         |          |          |   |         |          |          |   |         |          |          |
| H                                              | 5.69510                                                                                                                                                                                                                                                                                                                                                                                                                                                                                                                                                                                                                                                                                                                                                                                                                                                                                                                                                                                                                                                                                                                                                                                                                                                                                                                                                                                                                                                                                                                                                                                                                                                                                                                                                                                                                                                                                                                                                       | -4.03165 | -2.83069 |          |          |   |         |         |          |   |          |         |          |   |         |         |          |   |         |          |          |   |          |          |          |   |          |          |         |   |         |          |         |   |          |          |         |   |         |          |          |   |          |          |         |   |         |          |         |   |          |         |         |   |         |         |         |   |          |         |         |   |         |          |          |   |          |          |          |   |         |          |          |   |          |          |         |   |         |         |         |   |          |         |         |   |         |          |         |   |          |         |          |   |         |          |          |   |         |          |          |   |         |          |          |

|   |          |          |          |
|---|----------|----------|----------|
| C | -0.76177 | 0.87092  | 0.92630  |
| H | 5.98663  | -1.75755 | -1.70691 |
| C | 0.30120  | 1.84017  | 1.52326  |
| H | 7.27480  | -3.94679 | -2.01525 |
| C | 1.02720  | 2.75699  | 0.53972  |
| H | 5.88480  | -4.70670 | -1.19362 |
| C | 3.96288  | -1.16281 | 1.67455  |
| O | 1.26502  | 1.14809  | 2.31863  |
| C | 2.40863  | 2.97606  | 0.62214  |
| H | 3.00310  | -1.69213 | 1.60951  |
| C | 0.30115  | 3.48061  | -0.41896 |
| H | 4.59840  | -1.74763 | 2.34977  |
| C | 3.03993  | 3.88777  | -0.22787 |
| C | 3.28871  | 0.89731  | -2.62752 |
| C | 0.92891  | 4.39279  | -1.26724 |
| H | 2.25331  | 0.67982  | -2.35692 |
| C | 2.30600  | 4.60446  | -1.17415 |
| H | 3.46082  | 0.68311  | -3.68657 |
| H | -0.76128 | -0.00310 | 1.97386  |
| H | 3.46625  | 1.96601  | -2.46587 |
| O | -1.26143 | -0.25477 | -1.09852 |
| C | -0.85901 | -1.10191 | -2.17430 |
| C | -2.61738 | 2.44718  | 1.84885  |
| H | 0.33996  | 4.93698  | -2.00247 |
| H | 2.79949  | 5.31549  | -1.83289 |
| H | 4.11473  | 4.03423  | -0.14687 |
| H | 2.99568  | 2.42086  | 1.34270  |
| H | -0.77099 | 3.33008  | -0.51059 |
| H | -2.07967 | 3.38688  | 1.68953  |
| H | -2.41680 | 2.10116  | 2.86817  |
| H | -3.68951 | 2.65262  | 1.75997  |
| H | -0.24175 | 2.51082  | 2.20332  |
| H | -2.40211 | 1.80707  | -0.18665 |
| H | -2.68903 | -0.65810 | 2.75546  |
| H | -6.17142 | -2.26791 | 2.62075  |
| H | -5.12991 | -3.41686 | 1.77702  |
| H | -4.58197 | -2.68020 | 3.29335  |
| H | -4.32148 | 0.60801  | -0.92076 |
| H | -9.20890 | -1.01482 | -2.59937 |
| H | -1.78310 | -1.39797 | -2.67502 |
| H | -0.20657 | -0.56936 | -2.87448 |
| H | -8.27522 | -0.40114 | -3.99817 |
| H | -0.32633 | -1.98200 | -1.80282 |
| H | -8.17867 | -2.11972 | -3.50840 |
| O | -0.55963 | -0.54664 | 3.11211  |
| H | 0.73278  | 0.48502  | 2.85265  |
| C | -0.18658 | -1.88527 | 2.92675  |
| H | -1.05516 | -2.53653 | 2.71050  |
| H | 0.29648  | -2.28438 | 3.83454  |
| H | 0.52750  | -2.02085 | 2.09372  |
| H | -6.25919 | -1.32792 | -0.56936 |

Optimized Molecular Properties for **T8-INT3**

|                                                |                                                                                                                                                                                                                                                                                                                                                                                                                                                                                                                                                                                                                                                                                                                           |                          |                   |
|------------------------------------------------|---------------------------------------------------------------------------------------------------------------------------------------------------------------------------------------------------------------------------------------------------------------------------------------------------------------------------------------------------------------------------------------------------------------------------------------------------------------------------------------------------------------------------------------------------------------------------------------------------------------------------------------------------------------------------------------------------------------------------|--------------------------|-------------------|
| Number of<br>(-)<br>Vibrational<br>Frequencies | 0                                                                                                                                                                                                                                                                                                                                                                                                                                                                                                                                                                                                                                                                                                                         |                          |                   |
| Absolute<br>Energies<br>(Hartrees)             | <p><b>B3LYP/6-31G(d)</b></p> <p>There are 21 positive frequencies below 100 cm<sup>-1</sup>.</p> <p>Zero-point correction: 0.639571 hartree<br/>         Enthalpy correction: 0.685896 hartree<br/>         Free Energy correction: 0.553292 hartree<br/>         Quasiharmonic Free Energy correction: 0.568104 hartree</p> <p>SCF Energy: -1872.281822 hartree<br/>         SCF Energy + ZPVE: -1871.642251 hartree<br/>         Enthalpy: -1871.595926 hartree<br/>         Free Energy: -1871.728530 hartree</p> <p>Free Energy with quasiharmonic correction: -1871.713718 hartree<br/>         (correction: 9.29 kcal/mol)</p> <p><b>B3LYP-D3/6-311+G(d,p)</b></p> <p>SCF Done: E(RB3LYP) = -1872.96849509 A.U.</p> |                          |                   |
| Cartesian<br>Coordinates                       | 77<br>spD3-INT3-T8.out                                                                                                                                                                                                                                                                                                                                                                                                                                                                                                                                                                                                                                                                                                    | Energy: -1175305.4658077 |                   |
|                                                | C                                                                                                                                                                                                                                                                                                                                                                                                                                                                                                                                                                                                                                                                                                                         | 7.98815                  | -0.80116 0.75955  |
|                                                | C                                                                                                                                                                                                                                                                                                                                                                                                                                                                                                                                                                                                                                                                                                                         | -4.73541                 | 0.25829 0.91626   |
|                                                | O                                                                                                                                                                                                                                                                                                                                                                                                                                                                                                                                                                                                                                                                                                                         | 7.34732                  | -0.07234 1.50186  |
|                                                | O                                                                                                                                                                                                                                                                                                                                                                                                                                                                                                                                                                                                                                                                                                                         | -5.95511                 | 0.01863 0.85311   |
|                                                | N                                                                                                                                                                                                                                                                                                                                                                                                                                                                                                                                                                                                                                                                                                                         | -3.82066                 | -0.39746 0.16485  |
|                                                | O                                                                                                                                                                                                                                                                                                                                                                                                                                                                                                                                                                                                                                                                                                                         | 7.53192                  | -1.35142 -0.35763 |
|                                                | C                                                                                                                                                                                                                                                                                                                                                                                                                                                                                                                                                                                                                                                                                                                         | 4.04702                  | -0.82082 -1.75384 |
|                                                | C                                                                                                                                                                                                                                                                                                                                                                                                                                                                                                                                                                                                                                                                                                                         | -4.22702                 | -1.33046 -0.88782 |
|                                                | C                                                                                                                                                                                                                                                                                                                                                                                                                                                                                                                                                                                                                                                                                                                         | 2.89572                  | -0.15168 -1.40999 |
|                                                | C                                                                                                                                                                                                                                                                                                                                                                                                                                                                                                                                                                                                                                                                                                                         | -4.51845                 | -2.73672 -0.31136 |
|                                                | N                                                                                                                                                                                                                                                                                                                                                                                                                                                                                                                                                                                                                                                                                                                         | 4.99437                  | -0.61745 -0.77033 |
|                                                | O                                                                                                                                                                                                                                                                                                                                                                                                                                                                                                                                                                                                                                                                                                                         | -3.80503                 | -3.71560 -0.53738 |
|                                                | C                                                                                                                                                                                                                                                                                                                                                                                                                                                                                                                                                                                                                                                                                                                         | 4.41699                  | 0.15623 0.13956   |
|                                                | O                                                                                                                                                                                                                                                                                                                                                                                                                                                                                                                                                                                                                                                                                                                         | -3.01337                 | -0.16327 -2.66184 |
|                                                | N                                                                                                                                                                                                                                                                                                                                                                                                                                                                                                                                                                                                                                                                                                                         | 3.14254                  | 0.46260 -0.19669  |
|                                                | N                                                                                                                                                                                                                                                                                                                                                                                                                                                                                                                                                                                                                                                                                                                         | -5.64933                 | -2.78184 0.44564  |
|                                                | C                                                                                                                                                                                                                                                                                                                                                                                                                                                                                                                                                                                                                                                                                                                         | 9.43431                  | -1.18460 1.02723  |
|                                                | C                                                                                                                                                                                                                                                                                                                                                                                                                                                                                                                                                                                                                                                                                                                         | -6.03737                 | -3.96561 1.18225  |
|                                                | C                                                                                                                                                                                                                                                                                                                                                                                                                                                                                                                                                                                                                                                                                                                         | 4.31901                  | -1.66370 -2.96041 |
|                                                | H                                                                                                                                                                                                                                                                                                                                                                                                                                                                                                                                                                                                                                                                                                                         | -2.18400                 | 0.22036 -2.30595  |
|                                                | C                                                                                                                                                                                                                                                                                                                                                                                                                                                                                                                                                                                                                                                                                                                         | 2.22401                  | 1.38444 0.57966   |
|                                                | H                                                                                                                                                                                                                                                                                                                                                                                                                                                                                                                                                                                                                                                                                                                         | -5.16319                 | -0.93670 -1.30067 |
|                                                | C                                                                                                                                                                                                                                                                                                                                                                                                                                                                                                                                                                                                                                                                                                                         | 0.01722                  | 0.43764 1.36680   |
|                                                | H                                                                                                                                                                                                                                                                                                                                                                                                                                                                                                                                                                                                                                                                                                                         | -2.82863                 | -0.19346 0.31817  |
|                                                | O                                                                                                                                                                                                                                                                                                                                                                                                                                                                                                                                                                                                                                                                                                                         | -1.20883                 | 0.16429 1.35196   |
|                                                | H                                                                                                                                                                                                                                                                                                                                                                                                                                                                                                                                                                                                                                                                                                                         | -5.90074                 | -3.83529 2.26501  |
|                                                | C                                                                                                                                                                                                                                                                                                                                                                                                                                                                                                                                                                                                                                                                                                                         | 0.76191                  | 1.10021 0.38474   |

|   |          |          |          |
|---|----------|----------|----------|
| H | -6.08095 | -1.87807 | 0.65375  |
| C | 0.04342  | 1.58404  | -0.84561 |
| H | -7.08927 | -4.21690 | 0.99620  |
| C | -1.06107 | 2.63554  | -0.64646 |
| H | -5.40620 | -4.79012 | 0.84501  |
| C | -3.19707 | -1.40877 | -2.02324 |
| O | -0.48154 | 0.50004  | -1.68027 |
| C | -1.96281 | 2.92164  | -1.68255 |
| H | -2.25169 | -1.81377 | -1.64492 |
| C | -1.12841 | 3.41197  | 0.51601  |
| H | -3.57541 | -2.13243 | -2.75618 |
| C | -2.90833 | 3.93975  | -1.55331 |
| C | -4.18959 | 1.33411  | 1.83433  |
| C | -2.06752 | 4.43690  | 0.64745  |
| H | -3.14088 | 1.16057  | 2.08672  |
| C | -2.96530 | 4.70577  | -0.38704 |
| H | -4.80997 | 1.37647  | 2.73389  |
| H | 0.91277  | -1.54509 | -0.05120 |
| H | -4.25797 | 2.30261  | 1.32501  |
| O | 0.76606  | 0.02009  | 2.48091  |
| C | 0.01228  | -0.50454 | 3.56176  |
| C | 2.66487  | 2.83042  | 0.27684  |
| H | -2.10184 | 5.02068  | 1.56520  |
| H | -3.70078 | 5.50094  | -0.28613 |
| H | -3.60313 | 4.13253  | -2.36765 |
| H | -1.92934 | 2.34233  | -2.59912 |
| H | -0.43880 | 3.19345  | 1.32519  |
| H | 2.08925  | 3.52888  | 0.89265  |
| H | 2.50445  | 3.09270  | -0.77436 |
| H | 3.73059  | 2.97041  | 0.49398  |
| H | 0.78636  | 2.07814  | -1.48832 |
| H | 2.46436  | 1.17054  | 1.62246  |
| H | 1.93488  | -0.08395 | -1.89781 |
| H | 5.15592  | -1.26620 | -3.54930 |
| H | 4.58087  | -2.69180 | -2.67991 |
| H | 3.43757  | -1.70600 | -3.60779 |
| H | 4.90432  | 0.49490  | 1.04324  |
| H | 10.06585 | -0.87459 | 0.18742  |
| H | 0.74435  | -0.77157 | 4.33014  |
| H | -0.69054 | 0.23458  | 3.96589  |
| H | 9.78075  | -0.71088 | 1.94724  |
| H | -0.56066 | -1.39268 | 3.27463  |
| H | 9.52247  | -2.27323 | 1.11330  |
| O | 0.29966  | -2.07413 | -0.59046 |
| H | -0.33018 | -0.34182 | -1.20166 |
| C | -0.44244 | -2.92159 | 0.29218  |
| H | 0.20752  | -3.68128 | 0.75156  |
| H | -1.20817 | -3.42385 | -0.30255 |
| H | -0.94088 | -2.33855 | 1.07405  |
| H | 6.54923  | -1.07680 | -0.52137 |

Optimized Molecular Properties for **T8-TS4**

|                                                |                                                                                                                                                                                                                                                                                                                                                                                                                                                                                                                                                                                                                                                                                                                                                                                                                                                                                                                                                                                                                                                                                                                                                                                                                                                                                                                                                                                                                                                                                                                                                                                                                                                                                                                                                                                                                                                                                                                                                                                                                                    |          |          |         |          |   |          |         |          |   |         |         |          |   |          |         |         |   |          |         |         |   |         |         |          |   |         |          |         |   |          |         |         |   |         |          |         |   |          |         |         |   |         |          |         |   |          |         |         |   |         |          |          |   |          |         |         |   |         |          |          |   |          |         |         |   |         |         |          |   |          |         |          |   |         |          |         |   |          |         |         |   |         |          |          |   |          |         |         |   |         |          |          |   |          |         |          |   |          |          |          |   |          |         |          |   |         |          |          |
|------------------------------------------------|------------------------------------------------------------------------------------------------------------------------------------------------------------------------------------------------------------------------------------------------------------------------------------------------------------------------------------------------------------------------------------------------------------------------------------------------------------------------------------------------------------------------------------------------------------------------------------------------------------------------------------------------------------------------------------------------------------------------------------------------------------------------------------------------------------------------------------------------------------------------------------------------------------------------------------------------------------------------------------------------------------------------------------------------------------------------------------------------------------------------------------------------------------------------------------------------------------------------------------------------------------------------------------------------------------------------------------------------------------------------------------------------------------------------------------------------------------------------------------------------------------------------------------------------------------------------------------------------------------------------------------------------------------------------------------------------------------------------------------------------------------------------------------------------------------------------------------------------------------------------------------------------------------------------------------------------------------------------------------------------------------------------------------|----------|----------|---------|----------|---|----------|---------|----------|---|---------|---------|----------|---|----------|---------|---------|---|----------|---------|---------|---|---------|---------|----------|---|---------|----------|---------|---|----------|---------|---------|---|---------|----------|---------|---|----------|---------|---------|---|---------|----------|---------|---|----------|---------|---------|---|---------|----------|----------|---|----------|---------|---------|---|---------|----------|----------|---|----------|---------|---------|---|---------|---------|----------|---|----------|---------|----------|---|---------|----------|---------|---|----------|---------|---------|---|---------|----------|----------|---|----------|---------|---------|---|---------|----------|----------|---|----------|---------|----------|---|----------|----------|----------|---|----------|---------|----------|---|---------|----------|----------|
| Number of<br>(-)<br>Vibrational<br>Frequencies | 1 (-214.4171)                                                                                                                                                                                                                                                                                                                                                                                                                                                                                                                                                                                                                                                                                                                                                                                                                                                                                                                                                                                                                                                                                                                                                                                                                                                                                                                                                                                                                                                                                                                                                                                                                                                                                                                                                                                                                                                                                                                                                                                                                      |          |          |         |          |   |          |         |          |   |         |         |          |   |          |         |         |   |          |         |         |   |         |         |          |   |         |          |         |   |          |         |         |   |         |          |         |   |          |         |         |   |         |          |         |   |          |         |         |   |         |          |          |   |          |         |         |   |         |          |          |   |          |         |         |   |         |         |          |   |          |         |          |   |         |          |         |   |          |         |         |   |         |          |          |   |          |         |         |   |         |          |          |   |          |         |          |   |          |          |          |   |          |         |          |   |         |          |          |
| Absolute<br>Energies<br>(Hartrees)             | <p><b>B3LYP/6-31G(d)</b></p> <p>There are 22 positive frequencies below 100 cm<sup>-1</sup>.</p> <p>Zero-point correction: 0.637265 hartree<br/>         Enthalpy correction: 0.683599 hartree<br/>         Free Energy correction: 0.548960 hartree<br/>         Quasiharmonic Free Energy correction: 0.565982 hartree</p> <p>SCF Energy: -1872.269772 hartree<br/>         SCF Energy + ZPVE: -1871.632507 hartree<br/>         Enthalpy: -1871.586173 hartree<br/>         Free Energy: -1871.720812 hartree</p> <p>Free Energy with quasiharmonic correction: -1871.703790 hartree<br/>         (correction: 10.68 kcal/mol)</p> <p><b>B3LYP-D3/6-311+G(d,p)</b></p> <p>SCF Done: E(RB3LYP) = -1872.95462092 A.U.</p>                                                                                                                                                                                                                                                                                                                                                                                                                                                                                                                                                                                                                                                                                                                                                                                                                                                                                                                                                                                                                                                                                                                                                                                                                                                                                                         |          |          |         |          |   |          |         |          |   |         |         |          |   |          |         |         |   |          |         |         |   |         |         |          |   |         |          |         |   |          |         |         |   |         |          |         |   |          |         |         |   |         |          |         |   |          |         |         |   |         |          |          |   |          |         |         |   |         |          |          |   |          |         |         |   |         |         |          |   |          |         |          |   |         |          |         |   |          |         |         |   |         |          |          |   |          |         |         |   |         |          |          |   |          |         |          |   |          |          |          |   |          |         |          |   |         |          |          |
| Cartesian<br>Coordinates                       | <p>77<br/>         spD3-TS4-T8.out Energy: -1175296.7596346</p> <table> <tr><td>C</td><td>5.49686</td><td>2.92212</td><td>-1.13577</td></tr> <tr><td>C</td><td>-4.59630</td><td>0.69122</td><td>-0.37147</td></tr> <tr><td>O</td><td>4.67932</td><td>2.48109</td><td>-1.92889</td></tr> <tr><td>O</td><td>-5.66734</td><td>1.16701</td><td>0.04499</td></tr> <tr><td>N</td><td>-3.38466</td><td>1.12527</td><td>0.03513</td></tr> <tr><td>O</td><td>5.92345</td><td>2.30268</td><td>-0.04440</td></tr> <tr><td>C</td><td>4.89866</td><td>-1.10263</td><td>1.12919</td></tr> <tr><td>C</td><td>-3.19458</td><td>2.10551</td><td>1.10493</td></tr> <tr><td>C</td><td>4.00041</td><td>-2.09786</td><td>0.77493</td></tr> <tr><td>C</td><td>-3.40278</td><td>3.55498</td><td>0.59922</td></tr> <tr><td>N</td><td>4.74441</td><td>-0.05534</td><td>0.25037</td></tr> <tr><td>O</td><td>-2.49324</td><td>4.38248</td><td>0.56793</td></tr> <tr><td>C</td><td>3.77811</td><td>-0.44158</td><td>-0.59567</td></tr> <tr><td>O</td><td>-1.68186</td><td>0.74790</td><td>2.47896</td></tr> <tr><td>N</td><td>3.29805</td><td>-1.66582</td><td>-0.32857</td></tr> <tr><td>N</td><td>-4.68616</td><td>3.82183</td><td>0.22853</td></tr> <tr><td>C</td><td>6.14888</td><td>4.28706</td><td>-1.30056</td></tr> <tr><td>C</td><td>-5.06845</td><td>5.08596</td><td>-0.36289</td></tr> <tr><td>C</td><td>5.92209</td><td>-1.08544</td><td>2.22466</td></tr> <tr><td>H</td><td>-1.38304</td><td>0.01369</td><td>1.89869</td></tr> <tr><td>C</td><td>1.71366</td><td>-2.40583</td><td>-1.21820</td></tr> <tr><td>H</td><td>-3.94898</td><td>1.90204</td><td>1.87534</td></tr> <tr><td>C</td><td>0.00282</td><td>-0.64512</td><td>-1.36690</td></tr> <tr><td>H</td><td>-2.54946</td><td>0.68168</td><td>-0.35167</td></tr> <tr><td>O</td><td>-1.08142</td><td>-0.09516</td><td>-1.12948</td></tr> <tr><td>H</td><td>-5.30445</td><td>4.98262</td><td>-1.43150</td></tr> <tr><td>C</td><td>0.49431</td><td>-1.85439</td><td>-0.77642</td></tr> </table> | C        | 5.49686  | 2.92212 | -1.13577 | C | -4.59630 | 0.69122 | -0.37147 | O | 4.67932 | 2.48109 | -1.92889 | O | -5.66734 | 1.16701 | 0.04499 | N | -3.38466 | 1.12527 | 0.03513 | O | 5.92345 | 2.30268 | -0.04440 | C | 4.89866 | -1.10263 | 1.12919 | C | -3.19458 | 2.10551 | 1.10493 | C | 4.00041 | -2.09786 | 0.77493 | C | -3.40278 | 3.55498 | 0.59922 | N | 4.74441 | -0.05534 | 0.25037 | O | -2.49324 | 4.38248 | 0.56793 | C | 3.77811 | -0.44158 | -0.59567 | O | -1.68186 | 0.74790 | 2.47896 | N | 3.29805 | -1.66582 | -0.32857 | N | -4.68616 | 3.82183 | 0.22853 | C | 6.14888 | 4.28706 | -1.30056 | C | -5.06845 | 5.08596 | -0.36289 | C | 5.92209 | -1.08544 | 2.22466 | H | -1.38304 | 0.01369 | 1.89869 | C | 1.71366 | -2.40583 | -1.21820 | H | -3.94898 | 1.90204 | 1.87534 | C | 0.00282 | -0.64512 | -1.36690 | H | -2.54946 | 0.68168 | -0.35167 | O | -1.08142 | -0.09516 | -1.12948 | H | -5.30445 | 4.98262 | -1.43150 | C | 0.49431 | -1.85439 | -0.77642 |
| C                                              | 5.49686                                                                                                                                                                                                                                                                                                                                                                                                                                                                                                                                                                                                                                                                                                                                                                                                                                                                                                                                                                                                                                                                                                                                                                                                                                                                                                                                                                                                                                                                                                                                                                                                                                                                                                                                                                                                                                                                                                                                                                                                                            | 2.92212  | -1.13577 |         |          |   |          |         |          |   |         |         |          |   |          |         |         |   |          |         |         |   |         |         |          |   |         |          |         |   |          |         |         |   |         |          |         |   |          |         |         |   |         |          |         |   |          |         |         |   |         |          |          |   |          |         |         |   |         |          |          |   |          |         |         |   |         |         |          |   |          |         |          |   |         |          |         |   |          |         |         |   |         |          |          |   |          |         |         |   |         |          |          |   |          |         |          |   |          |          |          |   |          |         |          |   |         |          |          |
| C                                              | -4.59630                                                                                                                                                                                                                                                                                                                                                                                                                                                                                                                                                                                                                                                                                                                                                                                                                                                                                                                                                                                                                                                                                                                                                                                                                                                                                                                                                                                                                                                                                                                                                                                                                                                                                                                                                                                                                                                                                                                                                                                                                           | 0.69122  | -0.37147 |         |          |   |          |         |          |   |         |         |          |   |          |         |         |   |          |         |         |   |         |         |          |   |         |          |         |   |          |         |         |   |         |          |         |   |          |         |         |   |         |          |         |   |          |         |         |   |         |          |          |   |          |         |         |   |         |          |          |   |          |         |         |   |         |         |          |   |          |         |          |   |         |          |         |   |          |         |         |   |         |          |          |   |          |         |         |   |         |          |          |   |          |         |          |   |          |          |          |   |          |         |          |   |         |          |          |
| O                                              | 4.67932                                                                                                                                                                                                                                                                                                                                                                                                                                                                                                                                                                                                                                                                                                                                                                                                                                                                                                                                                                                                                                                                                                                                                                                                                                                                                                                                                                                                                                                                                                                                                                                                                                                                                                                                                                                                                                                                                                                                                                                                                            | 2.48109  | -1.92889 |         |          |   |          |         |          |   |         |         |          |   |          |         |         |   |          |         |         |   |         |         |          |   |         |          |         |   |          |         |         |   |         |          |         |   |          |         |         |   |         |          |         |   |          |         |         |   |         |          |          |   |          |         |         |   |         |          |          |   |          |         |         |   |         |         |          |   |          |         |          |   |         |          |         |   |          |         |         |   |         |          |          |   |          |         |         |   |         |          |          |   |          |         |          |   |          |          |          |   |          |         |          |   |         |          |          |
| O                                              | -5.66734                                                                                                                                                                                                                                                                                                                                                                                                                                                                                                                                                                                                                                                                                                                                                                                                                                                                                                                                                                                                                                                                                                                                                                                                                                                                                                                                                                                                                                                                                                                                                                                                                                                                                                                                                                                                                                                                                                                                                                                                                           | 1.16701  | 0.04499  |         |          |   |          |         |          |   |         |         |          |   |          |         |         |   |          |         |         |   |         |         |          |   |         |          |         |   |          |         |         |   |         |          |         |   |          |         |         |   |         |          |         |   |          |         |         |   |         |          |          |   |          |         |         |   |         |          |          |   |          |         |         |   |         |         |          |   |          |         |          |   |         |          |         |   |          |         |         |   |         |          |          |   |          |         |         |   |         |          |          |   |          |         |          |   |          |          |          |   |          |         |          |   |         |          |          |
| N                                              | -3.38466                                                                                                                                                                                                                                                                                                                                                                                                                                                                                                                                                                                                                                                                                                                                                                                                                                                                                                                                                                                                                                                                                                                                                                                                                                                                                                                                                                                                                                                                                                                                                                                                                                                                                                                                                                                                                                                                                                                                                                                                                           | 1.12527  | 0.03513  |         |          |   |          |         |          |   |         |         |          |   |          |         |         |   |          |         |         |   |         |         |          |   |         |          |         |   |          |         |         |   |         |          |         |   |          |         |         |   |         |          |         |   |          |         |         |   |         |          |          |   |          |         |         |   |         |          |          |   |          |         |         |   |         |         |          |   |          |         |          |   |         |          |         |   |          |         |         |   |         |          |          |   |          |         |         |   |         |          |          |   |          |         |          |   |          |          |          |   |          |         |          |   |         |          |          |
| O                                              | 5.92345                                                                                                                                                                                                                                                                                                                                                                                                                                                                                                                                                                                                                                                                                                                                                                                                                                                                                                                                                                                                                                                                                                                                                                                                                                                                                                                                                                                                                                                                                                                                                                                                                                                                                                                                                                                                                                                                                                                                                                                                                            | 2.30268  | -0.04440 |         |          |   |          |         |          |   |         |         |          |   |          |         |         |   |          |         |         |   |         |         |          |   |         |          |         |   |          |         |         |   |         |          |         |   |          |         |         |   |         |          |         |   |          |         |         |   |         |          |          |   |          |         |         |   |         |          |          |   |          |         |         |   |         |         |          |   |          |         |          |   |         |          |         |   |          |         |         |   |         |          |          |   |          |         |         |   |         |          |          |   |          |         |          |   |          |          |          |   |          |         |          |   |         |          |          |
| C                                              | 4.89866                                                                                                                                                                                                                                                                                                                                                                                                                                                                                                                                                                                                                                                                                                                                                                                                                                                                                                                                                                                                                                                                                                                                                                                                                                                                                                                                                                                                                                                                                                                                                                                                                                                                                                                                                                                                                                                                                                                                                                                                                            | -1.10263 | 1.12919  |         |          |   |          |         |          |   |         |         |          |   |          |         |         |   |          |         |         |   |         |         |          |   |         |          |         |   |          |         |         |   |         |          |         |   |          |         |         |   |         |          |         |   |          |         |         |   |         |          |          |   |          |         |         |   |         |          |          |   |          |         |         |   |         |         |          |   |          |         |          |   |         |          |         |   |          |         |         |   |         |          |          |   |          |         |         |   |         |          |          |   |          |         |          |   |          |          |          |   |          |         |          |   |         |          |          |
| C                                              | -3.19458                                                                                                                                                                                                                                                                                                                                                                                                                                                                                                                                                                                                                                                                                                                                                                                                                                                                                                                                                                                                                                                                                                                                                                                                                                                                                                                                                                                                                                                                                                                                                                                                                                                                                                                                                                                                                                                                                                                                                                                                                           | 2.10551  | 1.10493  |         |          |   |          |         |          |   |         |         |          |   |          |         |         |   |          |         |         |   |         |         |          |   |         |          |         |   |          |         |         |   |         |          |         |   |          |         |         |   |         |          |         |   |          |         |         |   |         |          |          |   |          |         |         |   |         |          |          |   |          |         |         |   |         |         |          |   |          |         |          |   |         |          |         |   |          |         |         |   |         |          |          |   |          |         |         |   |         |          |          |   |          |         |          |   |          |          |          |   |          |         |          |   |         |          |          |
| C                                              | 4.00041                                                                                                                                                                                                                                                                                                                                                                                                                                                                                                                                                                                                                                                                                                                                                                                                                                                                                                                                                                                                                                                                                                                                                                                                                                                                                                                                                                                                                                                                                                                                                                                                                                                                                                                                                                                                                                                                                                                                                                                                                            | -2.09786 | 0.77493  |         |          |   |          |         |          |   |         |         |          |   |          |         |         |   |          |         |         |   |         |         |          |   |         |          |         |   |          |         |         |   |         |          |         |   |          |         |         |   |         |          |         |   |          |         |         |   |         |          |          |   |          |         |         |   |         |          |          |   |          |         |         |   |         |         |          |   |          |         |          |   |         |          |         |   |          |         |         |   |         |          |          |   |          |         |         |   |         |          |          |   |          |         |          |   |          |          |          |   |          |         |          |   |         |          |          |
| C                                              | -3.40278                                                                                                                                                                                                                                                                                                                                                                                                                                                                                                                                                                                                                                                                                                                                                                                                                                                                                                                                                                                                                                                                                                                                                                                                                                                                                                                                                                                                                                                                                                                                                                                                                                                                                                                                                                                                                                                                                                                                                                                                                           | 3.55498  | 0.59922  |         |          |   |          |         |          |   |         |         |          |   |          |         |         |   |          |         |         |   |         |         |          |   |         |          |         |   |          |         |         |   |         |          |         |   |          |         |         |   |         |          |         |   |          |         |         |   |         |          |          |   |          |         |         |   |         |          |          |   |          |         |         |   |         |         |          |   |          |         |          |   |         |          |         |   |          |         |         |   |         |          |          |   |          |         |         |   |         |          |          |   |          |         |          |   |          |          |          |   |          |         |          |   |         |          |          |
| N                                              | 4.74441                                                                                                                                                                                                                                                                                                                                                                                                                                                                                                                                                                                                                                                                                                                                                                                                                                                                                                                                                                                                                                                                                                                                                                                                                                                                                                                                                                                                                                                                                                                                                                                                                                                                                                                                                                                                                                                                                                                                                                                                                            | -0.05534 | 0.25037  |         |          |   |          |         |          |   |         |         |          |   |          |         |         |   |          |         |         |   |         |         |          |   |         |          |         |   |          |         |         |   |         |          |         |   |          |         |         |   |         |          |         |   |          |         |         |   |         |          |          |   |          |         |         |   |         |          |          |   |          |         |         |   |         |         |          |   |          |         |          |   |         |          |         |   |          |         |         |   |         |          |          |   |          |         |         |   |         |          |          |   |          |         |          |   |          |          |          |   |          |         |          |   |         |          |          |
| O                                              | -2.49324                                                                                                                                                                                                                                                                                                                                                                                                                                                                                                                                                                                                                                                                                                                                                                                                                                                                                                                                                                                                                                                                                                                                                                                                                                                                                                                                                                                                                                                                                                                                                                                                                                                                                                                                                                                                                                                                                                                                                                                                                           | 4.38248  | 0.56793  |         |          |   |          |         |          |   |         |         |          |   |          |         |         |   |          |         |         |   |         |         |          |   |         |          |         |   |          |         |         |   |         |          |         |   |          |         |         |   |         |          |         |   |          |         |         |   |         |          |          |   |          |         |         |   |         |          |          |   |          |         |         |   |         |         |          |   |          |         |          |   |         |          |         |   |          |         |         |   |         |          |          |   |          |         |         |   |         |          |          |   |          |         |          |   |          |          |          |   |          |         |          |   |         |          |          |
| C                                              | 3.77811                                                                                                                                                                                                                                                                                                                                                                                                                                                                                                                                                                                                                                                                                                                                                                                                                                                                                                                                                                                                                                                                                                                                                                                                                                                                                                                                                                                                                                                                                                                                                                                                                                                                                                                                                                                                                                                                                                                                                                                                                            | -0.44158 | -0.59567 |         |          |   |          |         |          |   |         |         |          |   |          |         |         |   |          |         |         |   |         |         |          |   |         |          |         |   |          |         |         |   |         |          |         |   |          |         |         |   |         |          |         |   |          |         |         |   |         |          |          |   |          |         |         |   |         |          |          |   |          |         |         |   |         |         |          |   |          |         |          |   |         |          |         |   |          |         |         |   |         |          |          |   |          |         |         |   |         |          |          |   |          |         |          |   |          |          |          |   |          |         |          |   |         |          |          |
| O                                              | -1.68186                                                                                                                                                                                                                                                                                                                                                                                                                                                                                                                                                                                                                                                                                                                                                                                                                                                                                                                                                                                                                                                                                                                                                                                                                                                                                                                                                                                                                                                                                                                                                                                                                                                                                                                                                                                                                                                                                                                                                                                                                           | 0.74790  | 2.47896  |         |          |   |          |         |          |   |         |         |          |   |          |         |         |   |          |         |         |   |         |         |          |   |         |          |         |   |          |         |         |   |         |          |         |   |          |         |         |   |         |          |         |   |          |         |         |   |         |          |          |   |          |         |         |   |         |          |          |   |          |         |         |   |         |         |          |   |          |         |          |   |         |          |         |   |          |         |         |   |         |          |          |   |          |         |         |   |         |          |          |   |          |         |          |   |          |          |          |   |          |         |          |   |         |          |          |
| N                                              | 3.29805                                                                                                                                                                                                                                                                                                                                                                                                                                                                                                                                                                                                                                                                                                                                                                                                                                                                                                                                                                                                                                                                                                                                                                                                                                                                                                                                                                                                                                                                                                                                                                                                                                                                                                                                                                                                                                                                                                                                                                                                                            | -1.66582 | -0.32857 |         |          |   |          |         |          |   |         |         |          |   |          |         |         |   |          |         |         |   |         |         |          |   |         |          |         |   |          |         |         |   |         |          |         |   |          |         |         |   |         |          |         |   |          |         |         |   |         |          |          |   |          |         |         |   |         |          |          |   |          |         |         |   |         |         |          |   |          |         |          |   |         |          |         |   |          |         |         |   |         |          |          |   |          |         |         |   |         |          |          |   |          |         |          |   |          |          |          |   |          |         |          |   |         |          |          |
| N                                              | -4.68616                                                                                                                                                                                                                                                                                                                                                                                                                                                                                                                                                                                                                                                                                                                                                                                                                                                                                                                                                                                                                                                                                                                                                                                                                                                                                                                                                                                                                                                                                                                                                                                                                                                                                                                                                                                                                                                                                                                                                                                                                           | 3.82183  | 0.22853  |         |          |   |          |         |          |   |         |         |          |   |          |         |         |   |          |         |         |   |         |         |          |   |         |          |         |   |          |         |         |   |         |          |         |   |          |         |         |   |         |          |         |   |          |         |         |   |         |          |          |   |          |         |         |   |         |          |          |   |          |         |         |   |         |         |          |   |          |         |          |   |         |          |         |   |          |         |         |   |         |          |          |   |          |         |         |   |         |          |          |   |          |         |          |   |          |          |          |   |          |         |          |   |         |          |          |
| C                                              | 6.14888                                                                                                                                                                                                                                                                                                                                                                                                                                                                                                                                                                                                                                                                                                                                                                                                                                                                                                                                                                                                                                                                                                                                                                                                                                                                                                                                                                                                                                                                                                                                                                                                                                                                                                                                                                                                                                                                                                                                                                                                                            | 4.28706  | -1.30056 |         |          |   |          |         |          |   |         |         |          |   |          |         |         |   |          |         |         |   |         |         |          |   |         |          |         |   |          |         |         |   |         |          |         |   |          |         |         |   |         |          |         |   |          |         |         |   |         |          |          |   |          |         |         |   |         |          |          |   |          |         |         |   |         |         |          |   |          |         |          |   |         |          |         |   |          |         |         |   |         |          |          |   |          |         |         |   |         |          |          |   |          |         |          |   |          |          |          |   |          |         |          |   |         |          |          |
| C                                              | -5.06845                                                                                                                                                                                                                                                                                                                                                                                                                                                                                                                                                                                                                                                                                                                                                                                                                                                                                                                                                                                                                                                                                                                                                                                                                                                                                                                                                                                                                                                                                                                                                                                                                                                                                                                                                                                                                                                                                                                                                                                                                           | 5.08596  | -0.36289 |         |          |   |          |         |          |   |         |         |          |   |          |         |         |   |          |         |         |   |         |         |          |   |         |          |         |   |          |         |         |   |         |          |         |   |          |         |         |   |         |          |         |   |          |         |         |   |         |          |          |   |          |         |         |   |         |          |          |   |          |         |         |   |         |         |          |   |          |         |          |   |         |          |         |   |          |         |         |   |         |          |          |   |          |         |         |   |         |          |          |   |          |         |          |   |          |          |          |   |          |         |          |   |         |          |          |
| C                                              | 5.92209                                                                                                                                                                                                                                                                                                                                                                                                                                                                                                                                                                                                                                                                                                                                                                                                                                                                                                                                                                                                                                                                                                                                                                                                                                                                                                                                                                                                                                                                                                                                                                                                                                                                                                                                                                                                                                                                                                                                                                                                                            | -1.08544 | 2.22466  |         |          |   |          |         |          |   |         |         |          |   |          |         |         |   |          |         |         |   |         |         |          |   |         |          |         |   |          |         |         |   |         |          |         |   |          |         |         |   |         |          |         |   |          |         |         |   |         |          |          |   |          |         |         |   |         |          |          |   |          |         |         |   |         |         |          |   |          |         |          |   |         |          |         |   |          |         |         |   |         |          |          |   |          |         |         |   |         |          |          |   |          |         |          |   |          |          |          |   |          |         |          |   |         |          |          |
| H                                              | -1.38304                                                                                                                                                                                                                                                                                                                                                                                                                                                                                                                                                                                                                                                                                                                                                                                                                                                                                                                                                                                                                                                                                                                                                                                                                                                                                                                                                                                                                                                                                                                                                                                                                                                                                                                                                                                                                                                                                                                                                                                                                           | 0.01369  | 1.89869  |         |          |   |          |         |          |   |         |         |          |   |          |         |         |   |          |         |         |   |         |         |          |   |         |          |         |   |          |         |         |   |         |          |         |   |          |         |         |   |         |          |         |   |          |         |         |   |         |          |          |   |          |         |         |   |         |          |          |   |          |         |         |   |         |         |          |   |          |         |          |   |         |          |         |   |          |         |         |   |         |          |          |   |          |         |         |   |         |          |          |   |          |         |          |   |          |          |          |   |          |         |          |   |         |          |          |
| C                                              | 1.71366                                                                                                                                                                                                                                                                                                                                                                                                                                                                                                                                                                                                                                                                                                                                                                                                                                                                                                                                                                                                                                                                                                                                                                                                                                                                                                                                                                                                                                                                                                                                                                                                                                                                                                                                                                                                                                                                                                                                                                                                                            | -2.40583 | -1.21820 |         |          |   |          |         |          |   |         |         |          |   |          |         |         |   |          |         |         |   |         |         |          |   |         |          |         |   |          |         |         |   |         |          |         |   |          |         |         |   |         |          |         |   |          |         |         |   |         |          |          |   |          |         |         |   |         |          |          |   |          |         |         |   |         |         |          |   |          |         |          |   |         |          |         |   |          |         |         |   |         |          |          |   |          |         |         |   |         |          |          |   |          |         |          |   |          |          |          |   |          |         |          |   |         |          |          |
| H                                              | -3.94898                                                                                                                                                                                                                                                                                                                                                                                                                                                                                                                                                                                                                                                                                                                                                                                                                                                                                                                                                                                                                                                                                                                                                                                                                                                                                                                                                                                                                                                                                                                                                                                                                                                                                                                                                                                                                                                                                                                                                                                                                           | 1.90204  | 1.87534  |         |          |   |          |         |          |   |         |         |          |   |          |         |         |   |          |         |         |   |         |         |          |   |         |          |         |   |          |         |         |   |         |          |         |   |          |         |         |   |         |          |         |   |          |         |         |   |         |          |          |   |          |         |         |   |         |          |          |   |          |         |         |   |         |         |          |   |          |         |          |   |         |          |         |   |          |         |         |   |         |          |          |   |          |         |         |   |         |          |          |   |          |         |          |   |          |          |          |   |          |         |          |   |         |          |          |
| C                                              | 0.00282                                                                                                                                                                                                                                                                                                                                                                                                                                                                                                                                                                                                                                                                                                                                                                                                                                                                                                                                                                                                                                                                                                                                                                                                                                                                                                                                                                                                                                                                                                                                                                                                                                                                                                                                                                                                                                                                                                                                                                                                                            | -0.64512 | -1.36690 |         |          |   |          |         |          |   |         |         |          |   |          |         |         |   |          |         |         |   |         |         |          |   |         |          |         |   |          |         |         |   |         |          |         |   |          |         |         |   |         |          |         |   |          |         |         |   |         |          |          |   |          |         |         |   |         |          |          |   |          |         |         |   |         |         |          |   |          |         |          |   |         |          |         |   |          |         |         |   |         |          |          |   |          |         |         |   |         |          |          |   |          |         |          |   |          |          |          |   |          |         |          |   |         |          |          |
| H                                              | -2.54946                                                                                                                                                                                                                                                                                                                                                                                                                                                                                                                                                                                                                                                                                                                                                                                                                                                                                                                                                                                                                                                                                                                                                                                                                                                                                                                                                                                                                                                                                                                                                                                                                                                                                                                                                                                                                                                                                                                                                                                                                           | 0.68168  | -0.35167 |         |          |   |          |         |          |   |         |         |          |   |          |         |         |   |          |         |         |   |         |         |          |   |         |          |         |   |          |         |         |   |         |          |         |   |          |         |         |   |         |          |         |   |          |         |         |   |         |          |          |   |          |         |         |   |         |          |          |   |          |         |         |   |         |         |          |   |          |         |          |   |         |          |         |   |          |         |         |   |         |          |          |   |          |         |         |   |         |          |          |   |          |         |          |   |          |          |          |   |          |         |          |   |         |          |          |
| O                                              | -1.08142                                                                                                                                                                                                                                                                                                                                                                                                                                                                                                                                                                                                                                                                                                                                                                                                                                                                                                                                                                                                                                                                                                                                                                                                                                                                                                                                                                                                                                                                                                                                                                                                                                                                                                                                                                                                                                                                                                                                                                                                                           | -0.09516 | -1.12948 |         |          |   |          |         |          |   |         |         |          |   |          |         |         |   |          |         |         |   |         |         |          |   |         |          |         |   |          |         |         |   |         |          |         |   |          |         |         |   |         |          |         |   |          |         |         |   |         |          |          |   |          |         |         |   |         |          |          |   |          |         |         |   |         |         |          |   |          |         |          |   |         |          |         |   |          |         |         |   |         |          |          |   |          |         |         |   |         |          |          |   |          |         |          |   |          |          |          |   |          |         |          |   |         |          |          |
| H                                              | -5.30445                                                                                                                                                                                                                                                                                                                                                                                                                                                                                                                                                                                                                                                                                                                                                                                                                                                                                                                                                                                                                                                                                                                                                                                                                                                                                                                                                                                                                                                                                                                                                                                                                                                                                                                                                                                                                                                                                                                                                                                                                           | 4.98262  | -1.43150 |         |          |   |          |         |          |   |         |         |          |   |          |         |         |   |          |         |         |   |         |         |          |   |         |          |         |   |          |         |         |   |         |          |         |   |          |         |         |   |         |          |         |   |          |         |         |   |         |          |          |   |          |         |         |   |         |          |          |   |          |         |         |   |         |         |          |   |          |         |          |   |         |          |         |   |          |         |         |   |         |          |          |   |          |         |         |   |         |          |          |   |          |         |          |   |          |          |          |   |          |         |          |   |         |          |          |
| C                                              | 0.49431                                                                                                                                                                                                                                                                                                                                                                                                                                                                                                                                                                                                                                                                                                                                                                                                                                                                                                                                                                                                                                                                                                                                                                                                                                                                                                                                                                                                                                                                                                                                                                                                                                                                                                                                                                                                                                                                                                                                                                                                                            | -1.85439 | -0.77642 |         |          |   |          |         |          |   |         |         |          |   |          |         |         |   |          |         |         |   |         |         |          |   |         |          |         |   |          |         |         |   |         |          |         |   |          |         |         |   |         |          |         |   |          |         |         |   |         |          |          |   |          |         |         |   |         |          |          |   |          |         |         |   |         |         |          |   |          |         |          |   |         |          |         |   |          |         |         |   |         |          |          |   |          |         |         |   |         |          |          |   |          |         |          |   |          |          |          |   |          |         |          |   |         |          |          |

|   |          |          |          |
|---|----------|----------|----------|
| H | -5.32658 | 3.02497  | 0.20530  |
| C | -0.28665 | -2.42000 | 0.39150  |
| H | -5.94641 | 5.50702  | 0.14341  |
| C | -1.67652 | -2.96810 | 0.05992  |
| H | -4.22718 | 5.77323  | -0.25403 |
| C | -1.80190 | 1.94176  | 1.73180  |
| O | -0.43167 | -1.51558 | 1.49730  |
| C | -2.69004 | -2.97739 | 1.02782  |
| H | -1.03782 | 2.01731  | 0.94635  |
| C | -1.93110 | -3.57837 | -1.17491 |
| H | -1.64343 | 2.78214  | 2.41401  |
| C | -3.91975 | -3.58618 | 0.76834  |
| C | -4.57968 | -0.43262 | -1.39137 |
| C | -3.15756 | -4.19091 | -1.43554 |
| H | -3.57623 | -0.65217 | -1.76279 |
| C | -4.15885 | -4.20226 | -0.46204 |
| H | -5.24004 | -0.16411 | -2.22240 |
| H | 2.73047  | -1.02425 | 2.22063  |
| H | -4.97992 | -1.33908 | -0.92629 |
| O | 0.84935  | -0.08376 | -2.30067 |
| C | 0.38630  | 1.12107  | -2.90607 |
| C | 2.05183  | -3.87270 | -1.04295 |
| H | -3.33242 | -4.65638 | -2.40344 |
| H | -5.11569 | -4.67947 | -0.66230 |
| H | -4.69404 | -3.57787 | 1.53258  |
| H | -2.50446 | -2.49681 | 1.98173  |
| H | -1.15753 | -3.55664 | -1.93764 |
| H | 1.35231  | -4.48327 | -1.62847 |
| H | 1.97785  | -4.20394 | -0.00241 |
| H | 3.06806  | -4.07792 | -1.39061 |
| H | 0.27771  | -3.28955 | 0.76395  |
| H | 2.05793  | -2.00670 | -2.16589 |
| H | 3.84978  | -3.07987 | 1.20561  |
| H | 6.94383  | -1.06087 | 1.82218  |
| H | 5.81210  | -0.20358 | 2.86858  |
| H | 5.83326  | -1.97642 | 2.85635  |
| H | 3.41537  | 0.18293  | -1.39998 |
| H | 5.88671  | 4.92880  | -0.45186 |
| H | 1.20317  | 1.45966  | -3.54672 |
| H | -0.51677 | 0.94576  | -3.50178 |
| H | 7.23981  | 4.18675  | -1.30565 |
| H | 0.16137  | 1.88200  | -2.15319 |
| H | 5.81202  | 4.75082  | -2.22935 |
| O | 1.92534  | -0.77946 | 2.71882  |
| H | 0.46224  | -1.32977 | 1.87238  |
| C | 1.83374  | 0.64673  | 2.76054  |
| H | 2.54237  | 1.06846  | 3.48806  |
| H | 0.81249  | 0.88762  | 3.06537  |
| H | 2.02943  | 1.09544  | 1.77912  |
| H | 5.45800  | 1.37653  | 0.06124  |

Optimized Molecular Properties for **T8-product**

|                                                |                                                                                                                                                                                                                                                                                                                                                                                                                                                                                                                                                                                                                                                                                                                            |                          |                   |
|------------------------------------------------|----------------------------------------------------------------------------------------------------------------------------------------------------------------------------------------------------------------------------------------------------------------------------------------------------------------------------------------------------------------------------------------------------------------------------------------------------------------------------------------------------------------------------------------------------------------------------------------------------------------------------------------------------------------------------------------------------------------------------|--------------------------|-------------------|
| Number of<br>(-)<br>Vibrational<br>Frequencies | 0                                                                                                                                                                                                                                                                                                                                                                                                                                                                                                                                                                                                                                                                                                                          |                          |                   |
| Absolute<br>Energies<br>(Hartrees)             | <p><b>B3LYP/6-31G(d)</b></p> <p>There are 22 positive frequencies below 100 cm<sup>-1</sup>.</p> <p>Zero-point correction: 0.637817 hartree<br/>         Enthalpy correction: 0.685008 hartree<br/>         Free Energy correction: 0.548103 hartree<br/>         Quasiharmonic Free Energy correction: 0.565715 hartree</p> <p>SCF Energy: -1872.306716 hartree<br/>         SCF Energy + ZPVE: -1871.668899 hartree<br/>         Enthalpy: -1871.621708 hartree<br/>         Free Energy: -1871.758613 hartree</p> <p>Free Energy with quasiharmonic correction: -1871.741001 hartree<br/>         (correction: 11.05 kcal/mol)</p> <p><b>B3LYP-D3/6-311+G(d,p)</b></p> <p>SCF Done: E(RB3LYP) = -1872.98841635 A.U.</p> |                          |                   |
| Cartesian<br>Coordinates                       | 77<br>spD3-product-T8.out                                                                                                                                                                                                                                                                                                                                                                                                                                                                                                                                                                                                                                                                                                  | Energy: -1175317.9665869 |                   |
|                                                | C                                                                                                                                                                                                                                                                                                                                                                                                                                                                                                                                                                                                                                                                                                                          | -5.01743                 | -2.44958 -2.18892 |
|                                                | C                                                                                                                                                                                                                                                                                                                                                                                                                                                                                                                                                                                                                                                                                                                          | 4.63135                  | -0.53280 -0.88188 |
|                                                | O                                                                                                                                                                                                                                                                                                                                                                                                                                                                                                                                                                                                                                                                                                                          | -3.83942                 | -2.15945 -1.87011 |
|                                                | O                                                                                                                                                                                                                                                                                                                                                                                                                                                                                                                                                                                                                                                                                                                          | 5.81588                  | -0.79989 -0.62181 |
|                                                | N                                                                                                                                                                                                                                                                                                                                                                                                                                                                                                                                                                                                                                                                                                                          | 3.59996                  | -0.90777 -0.09129 |
|                                                | O                                                                                                                                                                                                                                                                                                                                                                                                                                                                                                                                                                                                                                                                                                                          | -6.07767                 | -2.08645 -1.58704 |
|                                                | C                                                                                                                                                                                                                                                                                                                                                                                                                                                                                                                                                                                                                                                                                                                          | -6.03556                 | 0.09800 1.40714   |
|                                                | C                                                                                                                                                                                                                                                                                                                                                                                                                                                                                                                                                                                                                                                                                                                          | 3.78017                  | -1.56767 1.20433  |
|                                                | C                                                                                                                                                                                                                                                                                                                                                                                                                                                                                                                                                                                                                                                                                                                          | -5.12248                 | 0.74257 2.21223   |
|                                                | C                                                                                                                                                                                                                                                                                                                                                                                                                                                                                                                                                                                                                                                                                                                          | 4.04394                  | -3.08566 1.03706  |
|                                                | N                                                                                                                                                                                                                                                                                                                                                                                                                                                                                                                                                                                                                                                                                                                          | -5.28749                 | -0.57499 0.46723  |
|                                                | O                                                                                                                                                                                                                                                                                                                                                                                                                                                                                                                                                                                                                                                                                                                          | 3.24695                  | -3.93889 1.42232  |
|                                                | C                                                                                                                                                                                                                                                                                                                                                                                                                                                                                                                                                                                                                                                                                                                          | -3.98855                 | -0.32362 0.72700  |
|                                                | O                                                                                                                                                                                                                                                                                                                                                                                                                                                                                                                                                                                                                                                                                                                          | 2.46968                  | 0.01077 2.55294   |
|                                                | N                                                                                                                                                                                                                                                                                                                                                                                                                                                                                                                                                                                                                                                                                                                          | -3.83790                 | 0.47720 1.78122   |
|                                                | N                                                                                                                                                                                                                                                                                                                                                                                                                                                                                                                                                                                                                                                                                                                          | 5.24182                  | -3.36963 0.45487  |
|                                                | C                                                                                                                                                                                                                                                                                                                                                                                                                                                                                                                                                                                                                                                                                                                          | -5.21120                 | -3.35179 -3.42442 |
|                                                | C                                                                                                                                                                                                                                                                                                                                                                                                                                                                                                                                                                                                                                                                                                                          | 5.63351                  | -4.72283 0.12060  |
|                                                | C                                                                                                                                                                                                                                                                                                                                                                                                                                                                                                                                                                                                                                                                                                                          | -7.52966                 | 0.05295 1.43777   |
|                                                | H                                                                                                                                                                                                                                                                                                                                                                                                                                                                                                                                                                                                                                                                                                                          | 1.87519                  | 0.51692 1.96052   |
|                                                | C                                                                                                                                                                                                                                                                                                                                                                                                                                                                                                                                                                                                                                                                                                                          | -1.94216                 | 2.11374 -0.85374  |
|                                                | H                                                                                                                                                                                                                                                                                                                                                                                                                                                                                                                                                                                                                                                                                                                          | 4.66043                  | -1.11651 1.67824  |
|                                                | C                                                                                                                                                                                                                                                                                                                                                                                                                                                                                                                                                                                                                                                                                                                          | -0.17958                 | 0.42539 -1.10019  |
|                                                | H                                                                                                                                                                                                                                                                                                                                                                                                                                                                                                                                                                                                                                                                                                                          | 2.65736                  | -0.63701 -0.36338 |
|                                                | O                                                                                                                                                                                                                                                                                                                                                                                                                                                                                                                                                                                                                                                                                                                          | 0.98782                  | 0.06047 -1.03965  |
|                                                | H                                                                                                                                                                                                                                                                                                                                                                                                                                                                                                                                                                                                                                                                                                                          | 5.64845                  | -4.88494 -0.96603 |
|                                                | C                                                                                                                                                                                                                                                                                                                                                                                                                                                                                                                                                                                                                                                                                                                          | -0.67730                 | 1.73547 -0.58187  |



|   |          |          |          |
|---|----------|----------|----------|
| H | 5.76834  | -2.57494 | 0.08819  |
| C | 0.27578  | 2.50118  | 0.32656  |
| H | 6.63058  | -4.95254 | 0.51704  |
| C | 1.53666  | 3.01940  | -0.35769 |
| H | 4.90443  | -5.40088 | 0.56807  |
| C | 2.56456  | -1.32955 | 2.11198  |
| O | 0.62231  | 1.72451  | 1.46020  |
| C | 2.77931  | 2.96478  | 0.28358  |
| H | 1.65187  | -1.66165 | 1.59817  |
| C | 1.44608  | 3.66167  | -1.59977 |
| H | 2.68022  | -1.96992 | 2.99145  |
| C | 3.90522  | 3.54320  | -0.30722 |
| C | 4.25944  | 0.24058  | -2.13407 |
| C | 2.57014  | 4.23937  | -2.18963 |
| H | 3.18156  | 0.28996  | -2.30175 |
| C | 3.80690  | 4.18589  | -1.54259 |
| H | 4.75182  | -0.22755 | -2.99236 |
| H | -2.35949 | 0.95757  | 2.52896  |
| H | 4.64274  | 1.26179  | -2.04469 |
| O | -1.14956 | -0.32377 | -1.63365 |
| C | -0.80401 | -1.62877 | -2.14103 |
| C | -2.67953 | 3.33230  | -0.38976 |
| H | 2.47929  | 4.73136  | -3.15543 |
| H | 4.68470  | 4.63789  | -1.99846 |
| H | 4.86387  | 3.48766  | 0.20315  |
| H | 2.86311  | 2.45953  | 1.23862  |
| H | 0.48662  | 3.70453  | -2.10980 |
| H | -3.15637 | 3.83598  | -1.24079 |
| H | -2.05936 | 4.06132  | 0.13706  |
| H | -3.48543 | 3.01354  | 0.28481  |
| H | -0.26206 | 3.39361  | 0.67730  |
| H | -2.53673 | 1.43389  | -1.45851 |
| H | -5.31249 | 1.37300  | 3.07206  |
| H | -7.96966 | 0.43488  | 0.50741  |
| H | -7.90432 | -0.97023 | 1.57065  |
| H | -7.90970 | 0.66122  | 2.26555  |
| H | -3.20617 | -0.74189 | 0.11078  |
| H | -4.79728 | -4.34700 | -3.21778 |
| H | -1.76785 | -2.09877 | -2.34537 |
| H | -0.18887 | -1.52326 | -3.04098 |
| H | -6.26749 | -3.45312 | -3.68993 |
| H | -0.23907 | -2.18350 | -1.38716 |
| H | -4.65308 | -2.94442 | -4.27577 |
| O | -1.48183 | 1.16405  | 2.98285  |
| H | -0.20762 | 1.55509  | 1.99536  |
| C | -1.10007 | 0.02335  | 3.74027  |
| H | -1.53996 | 0.04728  | 4.74919  |
| H | -0.00872 | 0.01935  | 3.83420  |
| H | -1.41146 | -0.91121 | 3.25378  |
| H | -5.62853 | -1.18709 | -0.34958 |

Optimized Molecular Properties for **T9-complex**

|                                                |                                                                                                                                                                                                                                                                                                                                                                                                                                                                                                                                                                                                                                                                                                                            |                         |                   |
|------------------------------------------------|----------------------------------------------------------------------------------------------------------------------------------------------------------------------------------------------------------------------------------------------------------------------------------------------------------------------------------------------------------------------------------------------------------------------------------------------------------------------------------------------------------------------------------------------------------------------------------------------------------------------------------------------------------------------------------------------------------------------------|-------------------------|-------------------|
| Number of<br>(-)<br>Vibrational<br>Frequencies | 0                                                                                                                                                                                                                                                                                                                                                                                                                                                                                                                                                                                                                                                                                                                          |                         |                   |
| Absolute<br>Energies<br>(Hartrees)             | <p><b>B3LYP/6-31G(d)</b></p> <p>There are 19 positive frequencies below 100 cm<sup>-1</sup>.</p> <p>Zero-point correction: 0.403054 hartree<br/>         Enthalpy correction: 0.437073 hartree<br/>         Free Energy correction: 0.322137 hartree<br/>         Quasiharmonic Free Energy correction: 0.342722 hartree</p> <p>SCF Energy: -1164.844402 hartree<br/>         SCF Energy + ZPVE: -1164.441348 hartree<br/>         Enthalpy: -1164.407329 hartree<br/>         Free Energy: -1164.522265 hartree</p> <p>Free Energy with quasiharmonic correction: -1164.501679 hartree<br/>         (correction: 12.92 kcal/mol)</p> <p><b>B3LYP-D3/6-311+G(d,p)</b></p> <p>SCF Done: E(RB3LYP) = -1165.27390926 A.U.</p> |                         |                   |
| Cartesian<br>Coordinates                       | 49<br>spD3-complex-T9.out                                                                                                                                                                                                                                                                                                                                                                                                                                                                                                                                                                                                                                                                                                  | Energy: -731220.4120393 |                   |
|                                                | C                                                                                                                                                                                                                                                                                                                                                                                                                                                                                                                                                                                                                                                                                                                          | 6.51118                 | 0.67910 1.82586   |
|                                                | O                                                                                                                                                                                                                                                                                                                                                                                                                                                                                                                                                                                                                                                                                                                          | 5.39082                 | 1.19180 2.02817   |
|                                                | O                                                                                                                                                                                                                                                                                                                                                                                                                                                                                                                                                                                                                                                                                                                          | 6.82443                 | -0.18554 0.93963  |
|                                                | C                                                                                                                                                                                                                                                                                                                                                                                                                                                                                                                                                                                                                                                                                                                          | 4.36954                 | -1.53932 -1.49844 |
|                                                | C                                                                                                                                                                                                                                                                                                                                                                                                                                                                                                                                                                                                                                                                                                                          | 3.03012                 | -1.40134 -1.79841 |
|                                                | N                                                                                                                                                                                                                                                                                                                                                                                                                                                                                                                                                                                                                                                                                                                          | 4.59081                 | -0.70418 -0.42799 |
|                                                | C                                                                                                                                                                                                                                                                                                                                                                                                                                                                                                                                                                                                                                                                                                                          | 3.41006                 | -0.11370 -0.13405 |
|                                                | N                                                                                                                                                                                                                                                                                                                                                                                                                                                                                                                                                                                                                                                                                                                          | 2.42697                 | -0.50573 -0.93993 |
|                                                | C                                                                                                                                                                                                                                                                                                                                                                                                                                                                                                                                                                                                                                                                                                                          | 7.68680                 | 1.11459 2.73280   |
|                                                | C                                                                                                                                                                                                                                                                                                                                                                                                                                                                                                                                                                                                                                                                                                                          | 5.44612                 | -2.37326 -2.11638 |
|                                                | C                                                                                                                                                                                                                                                                                                                                                                                                                                                                                                                                                                                                                                                                                                                          | -0.27661                | 1.20792 -1.29144  |
|                                                | C                                                                                                                                                                                                                                                                                                                                                                                                                                                                                                                                                                                                                                                                                                                          | -2.38494                | 0.18004 -0.49378  |
|                                                | O                                                                                                                                                                                                                                                                                                                                                                                                                                                                                                                                                                                                                                                                                                                          | -3.60802                | 0.24824 -0.30282  |
|                                                | C                                                                                                                                                                                                                                                                                                                                                                                                                                                                                                                                                                                                                                                                                                                          | -1.61160                | 1.24881 -1.12386  |
|                                                | H                                                                                                                                                                                                                                                                                                                                                                                                                                                                                                                                                                                                                                                                                                                          | -2.21319                | 2.09630 -1.44398  |
|                                                | O                                                                                                                                                                                                                                                                                                                                                                                                                                                                                                                                                                                                                                                                                                                          | -1.66937                | -0.89170 -0.13104 |
|                                                | C                                                                                                                                                                                                                                                                                                                                                                                                                                                                                                                                                                                                                                                                                                                          | -2.35998                | -1.95112 0.54189  |
|                                                | C                                                                                                                                                                                                                                                                                                                                                                                                                                                                                                                                                                                                                                                                                                                          | 0.51943                 | 2.29994 -1.92419  |
|                                                | H                                                                                                                                                                                                                                                                                                                                                                                                                                                                                                                                                                                                                                                                                                                          | 1.27365                 | 2.66529 -1.21506  |
|                                                | H                                                                                                                                                                                                                                                                                                                                                                                                                                                                                                                                                                                                                                                                                                                          | -0.09703                | 3.13880 -2.26412  |
|                                                | H                                                                                                                                                                                                                                                                                                                                                                                                                                                                                                                                                                                                                                                                                                                          | 1.09081                 | 1.89616 -2.76965  |
|                                                | H                                                                                                                                                                                                                                                                                                                                                                                                                                                                                                                                                                                                                                                                                                                          | 0.32015                 | 0.35145 -0.96664  |
|                                                | H                                                                                                                                                                                                                                                                                                                                                                                                                                                                                                                                                                                                                                                                                                                          | 2.47089                 | -1.89987 -2.58285 |
|                                                | H                                                                                                                                                                                                                                                                                                                                                                                                                                                                                                                                                                                                                                                                                                                          | 6.27567                 | -1.76071 -2.49445 |
|                                                | H                                                                                                                                                                                                                                                                                                                                                                                                                                                                                                                                                                                                                                                                                                                          | 5.87935                 | -3.08467 -1.40030 |
|                                                | H                                                                                                                                                                                                                                                                                                                                                                                                                                                                                                                                                                                                                                                                                                                          | 5.04286                 | -2.94816 -2.95781 |
|                                                | H                                                                                                                                                                                                                                                                                                                                                                                                                                                                                                                                                                                                                                                                                                                          | 3.34511                 | 0.59110 0.68366   |

|   |          |          |          |
|---|----------|----------|----------|
| H | 8.49283  | 1.54122  | 2.12204  |
| H | -1.60894 | -2.72464 | 0.70202  |
| H | -2.75584 | -1.60391 | 1.50095  |
| H | 7.36337  | 1.85136  | 3.47454  |
| H | -3.18356 | -2.33454 | -0.06617 |
| H | 8.10759  | 0.24034  | 3.24586  |
| H | 5.50514  | -0.51588 | 0.10613  |
| C | -6.75394 | -1.47305 | 1.11357  |
| O | -7.82753 | -2.05104 | 1.24108  |
| N | -6.05658 | -1.45085 | -0.05753 |
| O | -4.66017 | 2.75919  | -1.17422 |
| H | -4.40202 | 1.85166  | -0.91532 |
| H | -5.22462 | -0.88180 | -0.18783 |
| C | -4.73729 | 3.52209  | 0.01287  |
| H | -5.53039 | 3.17070  | 0.69385  |
| H | -4.97356 | 4.55275  | -0.27287 |
| C | -6.08319 | -0.74733 | 2.27483  |
| H | -5.81343 | -1.48111 | 3.04229  |
| H | -6.80734 | -0.06067 | 2.72336  |
| H | -5.18886 | -0.19165 | 1.97974  |
| H | -6.50308 | -1.85746 | -0.86784 |
| H | -3.78944 | 3.53554  | 0.57456  |

Optimized Molecular Properties for **T9-TS1**

|                                                |                                                                                                                                                                                                                                                                                                                                                                                                                                                                                                                                                                                                                                                                                                                                                                                                                                                                                                                                                                             |  |  |
|------------------------------------------------|-----------------------------------------------------------------------------------------------------------------------------------------------------------------------------------------------------------------------------------------------------------------------------------------------------------------------------------------------------------------------------------------------------------------------------------------------------------------------------------------------------------------------------------------------------------------------------------------------------------------------------------------------------------------------------------------------------------------------------------------------------------------------------------------------------------------------------------------------------------------------------------------------------------------------------------------------------------------------------|--|--|
| Number of<br>(-)<br>Vibrational<br>Frequencies | 1 (-165.3629)                                                                                                                                                                                                                                                                                                                                                                                                                                                                                                                                                                                                                                                                                                                                                                                                                                                                                                                                                               |  |  |
| Absolute<br>Energies<br>(Hartrees)             | <b>B3LYP/6-31G(d)</b><br><br>Zero-point correction: 0.403409 hartree<br>Enthalpy correction: 0.435571 hartree<br>Free Energy correction: 0.330211 hartree<br>Quasiharmonic Free Energy correction: 0.345015 hartree<br><br>SCF Energy: -1164.833124 hartree<br>SCF Energy + ZPVE: -1164.429715 hartree<br>Enthalpy: -1164.397553 hartree<br>Free Energy: -1164.502913 hartree<br><br>Free Energy with quasiharmonic correction: -1164.488109 hartree<br>(correction: 9.29 kcal/mol)<br><br><b>B3LYP-D3/6-311+G(d,p)</b><br><br>SCF Done: E(RB3LYP) = -1165.26628323 A.U.                                                                                                                                                                                                                                                                                                                                                                                                    |  |  |
| Cartesian<br>Coordinates                       | 49<br>spD3-TS1-T9.out Energy: -731215.6266333<br>C -6.59155 -0.32700 -0.47099<br>O -5.98920 0.60874 -1.03537<br>O -6.09639 -1.19579 0.32910<br>C -2.54067 -1.19512 1.29034<br>C -1.41258 -0.45276 1.01919<br>N -3.55909 -0.62047 0.56084<br>C -3.03921 0.42223 -0.11098<br>N -1.73883 0.55446 0.14698<br>C -8.10151 -0.49635 -0.73572<br>C -2.74831 -2.38771 2.16829<br>C -0.31962 1.81898 -0.58364<br>C 1.82641 0.57245 -0.55763<br>O 2.97581 0.33594 -0.11105<br>C 0.92384 1.52853 -0.02787<br>H 1.25328 2.02239 0.88117<br>O 1.37395 -0.10459 -1.65587<br>C 2.28127 -1.01712 -2.26610<br>C -1.01053 3.11466 -0.23515<br>H -0.51742 3.93859 -0.76966<br>H -0.93912 3.32119 0.83739<br>H -2.06619 3.10872 -0.51763<br>H -0.50506 1.44543 -1.58522<br>H -0.40061 -0.56634 1.38543<br>H -3.48513 -2.18954 2.95734<br>H -3.11261 -3.25324 1.60006<br>H -1.80668 -2.67167 2.64954<br>H -3.65676 1.03013 -0.75731<br>H -8.65542 -0.43769 0.20948<br>H 1.73171 -1.46148 -3.09885 |  |  |

|   |          |          |          |
|---|----------|----------|----------|
| H | 3.17334  | -0.50295 | -2.64093 |
| H | -8.46908 | 0.27112  | -1.42294 |
| H | 2.59869  | -1.79946 | -1.57035 |
| H | -8.29781 | -1.49002 | -1.15734 |
| H | -4.62006 | -0.89900 | 0.49107  |
| C | 6.02040  | -1.86349 | -0.10069 |
| O | 6.86874  | -2.72707 | 0.10609  |
| N | 4.75899  | -1.92019 | 0.40395  |
| O | 3.69958  | 2.18361  | 1.87039  |
| H | 3.46430  | 1.45933  | 1.24831  |
| H | 4.08136  | -1.16737 | 0.27908  |
| C | 4.17661  | 3.25015  | 1.08251  |
| H | 5.11331  | 3.00674  | 0.55072  |
| H | 4.38454  | 4.09354  | 1.75195  |
| C | 6.30794  | -0.63931 | -0.96411 |
| H | 6.61391  | -0.97401 | -1.96112 |
| H | 7.15463  | -0.09743 | -0.52999 |
| H | 5.45199  | 0.03521  | -1.04916 |
| H | 4.54556  | -2.68094 | 1.03379  |
| H | 3.44296  | 3.58670  | 0.33166  |

Optimized Molecular Properties for **T9-INT1**

|                                                |                                                                                                                                                                                                                                                                                                                                                                                                                                                                                                                                                                                                                                                                                                                           |                         |                   |
|------------------------------------------------|---------------------------------------------------------------------------------------------------------------------------------------------------------------------------------------------------------------------------------------------------------------------------------------------------------------------------------------------------------------------------------------------------------------------------------------------------------------------------------------------------------------------------------------------------------------------------------------------------------------------------------------------------------------------------------------------------------------------------|-------------------------|-------------------|
| Number of<br>(-)<br>Vibrational<br>Frequencies | 0                                                                                                                                                                                                                                                                                                                                                                                                                                                                                                                                                                                                                                                                                                                         |                         |                   |
| Absolute<br>Energies<br>(Hartrees)             | <p><b>B3LYP/6-31G(d)</b></p> <p>There are 16 positive frequencies below 100 cm<sup>-1</sup>.</p> <p>Zero-point correction: 0.405890 hartree<br/>         Enthalpy correction: 0.437653 hartree<br/>         Free Energy correction: 0.334447 hartree<br/>         Quasiharmonic Free Energy correction: 0.348067 hartree</p> <p>SCF Energy: -1164.848687 hartree<br/>         SCF Energy + ZPVE: -1164.442797 hartree<br/>         Enthalpy: -1164.411034 hartree<br/>         Free Energy: -1164.514240 hartree</p> <p>Free Energy with quasiharmonic correction: -1164.500620 hartree<br/>         (correction: 8.55 kcal/mol)</p> <p><b>B3LYP-D3/6-311+G(d,p)</b></p> <p>SCF Done: E(RB3LYP) = -1165.27935220 A.U.</p> |                         |                   |
| Cartesian<br>Coordinates                       | 49<br>spD3-INT1-T9.out                                                                                                                                                                                                                                                                                                                                                                                                                                                                                                                                                                                                                                                                                                    | Energy: -731223.8275357 |                   |
|                                                | C                                                                                                                                                                                                                                                                                                                                                                                                                                                                                                                                                                                                                                                                                                                         | 6.49866                 | -0.25846 0.69807  |
|                                                | O                                                                                                                                                                                                                                                                                                                                                                                                                                                                                                                                                                                                                                                                                                                         | 5.85302                 | 0.60311 1.27631   |
|                                                | O                                                                                                                                                                                                                                                                                                                                                                                                                                                                                                                                                                                                                                                                                                                         | 6.02614                 | -1.08598 -0.22267 |
|                                                | C                                                                                                                                                                                                                                                                                                                                                                                                                                                                                                                                                                                                                                                                                                                         | 2.47324                 | -1.13568 -1.49261 |
|                                                | C                                                                                                                                                                                                                                                                                                                                                                                                                                                                                                                                                                                                                                                                                                                         | 1.29201                 | -0.47010 -1.26350 |
|                                                | N                                                                                                                                                                                                                                                                                                                                                                                                                                                                                                                                                                                                                                                                                                                         | 3.44401                 | -0.61824 -0.65752 |
|                                                | C                                                                                                                                                                                                                                                                                                                                                                                                                                                                                                                                                                                                                                                                                                                         | 2.84753                 | 0.33463 0.04922   |
|                                                | N                                                                                                                                                                                                                                                                                                                                                                                                                                                                                                                                                                                                                                                                                                                         | 1.54257                 | 0.46344 -0.28356  |
|                                                | C                                                                                                                                                                                                                                                                                                                                                                                                                                                                                                                                                                                                                                                                                                                         | 7.97535                 | -0.50026 0.96963  |
|                                                | C                                                                                                                                                                                                                                                                                                                                                                                                                                                                                                                                                                                                                                                                                                                         | 2.76075                 | -2.24591 -2.45503 |
|                                                | C                                                                                                                                                                                                                                                                                                                                                                                                                                                                                                                                                                                                                                                                                                                         | 0.54051                 | 1.44732 0.31103   |
|                                                | C                                                                                                                                                                                                                                                                                                                                                                                                                                                                                                                                                                                                                                                                                                                         | -1.80971                | 0.53709 0.52159   |
|                                                | O                                                                                                                                                                                                                                                                                                                                                                                                                                                                                                                                                                                                                                                                                                                         | -3.04159                | 0.39813 0.20706   |
|                                                | C                                                                                                                                                                                                                                                                                                                                                                                                                                                                                                                                                                                                                                                                                                                         | -0.84717                | 1.23656 -0.17124  |
|                                                | H                                                                                                                                                                                                                                                                                                                                                                                                                                                                                                                                                                                                                                                                                                                         | -1.15812                | 1.70228 -1.10137  |
|                                                | O                                                                                                                                                                                                                                                                                                                                                                                                                                                                                                                                                                                                                                                                                                                         | -1.37020                | -0.07060 1.70195  |
|                                                | C                                                                                                                                                                                                                                                                                                                                                                                                                                                                                                                                                                                                                                                                                                                         | -2.37882                | -0.59581 2.54725  |
|                                                | C                                                                                                                                                                                                                                                                                                                                                                                                                                                                                                                                                                                                                                                                                                                         | 1.05368                 | 2.86588 0.01475   |
|                                                | H                                                                                                                                                                                                                                                                                                                                                                                                                                                                                                                                                                                                                                                                                                                         | 0.41702                 | 3.59178 0.53060   |
|                                                | H                                                                                                                                                                                                                                                                                                                                                                                                                                                                                                                                                                                                                                                                                                                         | 1.00113                 | 3.07192 -1.06083  |
|                                                | H                                                                                                                                                                                                                                                                                                                                                                                                                                                                                                                                                                                                                                                                                                                         | 2.09045                 | 3.01659 0.33957   |
|                                                | H                                                                                                                                                                                                                                                                                                                                                                                                                                                                                                                                                                                                                                                                                                                         | 0.58685                 | 1.25776 1.38743   |
|                                                | H                                                                                                                                                                                                                                                                                                                                                                                                                                                                                                                                                                                                                                                                                                                         | 0.30122                 | -0.57192 -1.67733 |
|                                                | H                                                                                                                                                                                                                                                                                                                                                                                                                                                                                                                                                                                                                                                                                                                         | 3.53611                 | -1.96340 -3.17941 |
|                                                | H                                                                                                                                                                                                                                                                                                                                                                                                                                                                                                                                                                                                                                                                                                                         | 3.11723                 | -3.14639 -1.93798 |
|                                                | H                                                                                                                                                                                                                                                                                                                                                                                                                                                                                                                                                                                                                                                                                                                         | 1.85907                 | -2.51466 -3.01523 |
|                                                | H                                                                                                                                                                                                                                                                                                                                                                                                                                                                                                                                                                                                                                                                                                                         | 3.34881                 | 0.92794 0.80055   |

|   |          |          |          |
|---|----------|----------|----------|
| H | 8.55119  | -0.37883 | 0.04552  |
| H | -1.85451 | -0.99063 | 3.42364  |
| H | -3.09050 | 0.17652  | 2.86690  |
| H | 8.33476  | 0.19996  | 1.72569  |
| H | -2.94537 | -1.40215 | 2.06868  |
| H | 8.12872  | -1.52931 | 1.31306  |
| H | 5.01733  | -0.90714 | -0.39419 |
| C | -5.87918 | -1.89543 | 0.13584  |
| O | -6.67084 | -2.82231 | -0.03649 |
| N | -4.57116 | -1.94953 | -0.21982 |
| O | -3.75275 | 2.18742  | -1.74304 |
| H | -3.51344 | 1.46844  | -1.10381 |
| H | -3.93440 | -1.14633 | -0.11618 |
| C | -3.85862 | 3.36468  | -0.98151 |
| H | -4.70440 | 3.34590  | -0.26959 |
| H | -4.02822 | 4.20284  | -1.67094 |
| C | -6.30342 | -0.57910 | 0.78041  |
| H | -6.77449 | -0.79428 | 1.74558  |
| H | -7.06197 | -0.10723 | 0.14614  |
| H | -5.46763 | 0.11178  | 0.91675  |
| H | -4.25927 | -2.78139 | -0.70156 |
| H | -2.94455 | 3.57950  | -0.40377 |

Optimized Molecular Properties for **T9-INT2**

|                                                |                                                                                                                                                                                                                                                                                                                                                                                                                                                                                                                                                                                                                                                                                                                                                                                                                                                                                                                                                                                                                                                                                                                                                                                                                                                                                                                                                                                                                                                                                                                                                                                                                                                                                                                                                                                                                                                                                                                                                                                                                                                    |          |          |         |          |   |          |         |         |   |         |         |          |   |          |         |         |   |          |         |         |   |         |         |         |   |         |          |         |   |         |          |         |   |         |          |         |   |         |          |          |   |          |          |         |   |         |          |          |   |         |         |          |   |         |          |         |   |          |          |         |   |         |          |          |   |          |         |          |   |          |         |         |   |          |         |         |   |          |          |          |   |          |          |          |   |          |          |          |   |          |          |         |   |          |          |          |   |          |          |          |   |          |          |         |   |          |         |          |
|------------------------------------------------|----------------------------------------------------------------------------------------------------------------------------------------------------------------------------------------------------------------------------------------------------------------------------------------------------------------------------------------------------------------------------------------------------------------------------------------------------------------------------------------------------------------------------------------------------------------------------------------------------------------------------------------------------------------------------------------------------------------------------------------------------------------------------------------------------------------------------------------------------------------------------------------------------------------------------------------------------------------------------------------------------------------------------------------------------------------------------------------------------------------------------------------------------------------------------------------------------------------------------------------------------------------------------------------------------------------------------------------------------------------------------------------------------------------------------------------------------------------------------------------------------------------------------------------------------------------------------------------------------------------------------------------------------------------------------------------------------------------------------------------------------------------------------------------------------------------------------------------------------------------------------------------------------------------------------------------------------------------------------------------------------------------------------------------------------|----------|----------|---------|----------|---|----------|---------|---------|---|---------|---------|----------|---|----------|---------|---------|---|----------|---------|---------|---|---------|---------|---------|---|---------|----------|---------|---|---------|----------|---------|---|---------|----------|---------|---|---------|----------|----------|---|----------|----------|---------|---|---------|----------|----------|---|---------|---------|----------|---|---------|----------|---------|---|----------|----------|---------|---|---------|----------|----------|---|----------|---------|----------|---|----------|---------|---------|---|----------|---------|---------|---|----------|----------|----------|---|----------|----------|----------|---|----------|----------|----------|---|----------|----------|---------|---|----------|----------|----------|---|----------|----------|----------|---|----------|----------|---------|---|----------|---------|----------|
| Number of<br>(-)<br>Vibrational<br>Frequencies | 0                                                                                                                                                                                                                                                                                                                                                                                                                                                                                                                                                                                                                                                                                                                                                                                                                                                                                                                                                                                                                                                                                                                                                                                                                                                                                                                                                                                                                                                                                                                                                                                                                                                                                                                                                                                                                                                                                                                                                                                                                                                  |          |          |         |          |   |          |         |         |   |         |         |          |   |          |         |         |   |          |         |         |   |         |         |         |   |         |          |         |   |         |          |         |   |         |          |         |   |         |          |          |   |          |          |         |   |         |          |          |   |         |         |          |   |         |          |         |   |          |          |         |   |         |          |          |   |          |         |          |   |          |         |         |   |          |         |         |   |          |          |          |   |          |          |          |   |          |          |          |   |          |          |         |   |          |          |          |   |          |          |          |   |          |          |         |   |          |         |          |
| Absolute<br>Energies<br>(Hartrees)             | <p><b>B3LYP/6-31G(d)</b></p> <p>There are 21 positive frequencies below 100 cm<sup>-1</sup>.</p> <p>Zero-point correction: 0.575323 hartree<br/>         Enthalpy correction: 0.617702 hartree<br/>         Free Energy correction: 0.491690 hartree<br/>         Quasiharmonic Free Energy correction: 0.507577 hartree</p> <p>SCF Energy: -1626.169136 hartree<br/>         SCF Energy + ZPVE: -1625.593813 hartree<br/>         Enthalpy: -1625.551434 hartree<br/>         Free Energy: -1625.677446 hartree</p> <p>Free Energy with quasiharmonic correction: -1625.661559 hartree<br/>         (correction: 9.97 kcal/mol)</p> <p><b>B3LYP-D3/6-311+G(d,p)</b></p> <p>SCF Done: E(RB3LYP) = -1626.76853502 A.U.</p>                                                                                                                                                                                                                                                                                                                                                                                                                                                                                                                                                                                                                                                                                                                                                                                                                                                                                                                                                                                                                                                                                                                                                                                                                                                                                                                          |          |          |         |          |   |          |         |         |   |         |         |          |   |          |         |         |   |          |         |         |   |         |         |         |   |         |          |         |   |         |          |         |   |         |          |         |   |         |          |          |   |          |          |         |   |         |          |          |   |         |         |          |   |         |          |         |   |          |          |         |   |         |          |          |   |          |         |          |   |          |         |         |   |          |         |         |   |          |          |          |   |          |          |          |   |          |          |          |   |          |          |         |   |          |          |          |   |          |          |          |   |          |          |         |   |          |         |          |
| Cartesian<br>Coordinates                       | <p>69<br/>spD3-INT2-T9.out Energy: -1020812.6595963</p> <table> <tbody> <tr><td>C</td><td>6.09018</td><td>1.54399</td><td>-0.71902</td></tr> <tr><td>C</td><td>-2.02130</td><td>4.34596</td><td>2.24608</td></tr> <tr><td>O</td><td>5.22411</td><td>1.52132</td><td>-1.58038</td></tr> <tr><td>O</td><td>-2.06996</td><td>5.35915</td><td>2.93888</td></tr> <tr><td>N</td><td>-0.90425</td><td>3.57600</td><td>2.13841</td></tr> <tr><td>O</td><td>6.08472</td><td>0.81866</td><td>0.39242</td></tr> <tr><td>C</td><td>3.31929</td><td>-1.62003</td><td>1.34431</td></tr> <tr><td>C</td><td>2.12452</td><td>-2.06199</td><td>0.83035</td></tr> <tr><td>N</td><td>3.87030</td><td>-0.69356</td><td>0.47785</td></tr> <tr><td>C</td><td>3.02162</td><td>-0.58316</td><td>-0.53255</td></tr> <tr><td>O</td><td>-3.71304</td><td>-2.57452</td><td>1.60921</td></tr> <tr><td>N</td><td>1.94686</td><td>-1.39123</td><td>-0.36783</td></tr> <tr><td>C</td><td>7.31986</td><td>2.43173</td><td>-0.80678</td></tr> <tr><td>C</td><td>3.99609</td><td>-2.01142</td><td>2.62059</td></tr> <tr><td>H</td><td>-3.23463</td><td>-2.57284</td><td>0.72819</td></tr> <tr><td>C</td><td>0.80097</td><td>-1.54685</td><td>-1.29189</td></tr> <tr><td>C</td><td>-0.40817</td><td>0.48877</td><td>-0.40069</td></tr> <tr><td>H</td><td>-0.88557</td><td>2.69497</td><td>1.62951</td></tr> <tr><td>O</td><td>-0.84539</td><td>1.06399</td><td>0.58422</td></tr> <tr><td>C</td><td>-0.47999</td><td>-0.99801</td><td>-0.61174</td></tr> <tr><td>C</td><td>-1.85655</td><td>-1.50333</td><td>-1.34683</td></tr> <tr><td>C</td><td>-2.86695</td><td>-0.35169</td><td>-1.53290</td></tr> <tr><td>C</td><td>-2.87000</td><td>-1.91114</td><td>2.52842</td></tr> <tr><td>O</td><td>-2.33725</td><td>-2.58943</td><td>-0.70833</td></tr> <tr><td>C</td><td>-3.95937</td><td>-0.18285</td><td>-0.67295</td></tr> <tr><td>H</td><td>-1.91436</td><td>-2.43822</td><td>2.67179</td></tr> <tr><td>C</td><td>-2.73361</td><td>0.53139</td><td>-2.61498</td></tr> </tbody> </table> | C        | 6.09018  | 1.54399 | -0.71902 | C | -2.02130 | 4.34596 | 2.24608 | O | 5.22411 | 1.52132 | -1.58038 | O | -2.06996 | 5.35915 | 2.93888 | N | -0.90425 | 3.57600 | 2.13841 | O | 6.08472 | 0.81866 | 0.39242 | C | 3.31929 | -1.62003 | 1.34431 | C | 2.12452 | -2.06199 | 0.83035 | N | 3.87030 | -0.69356 | 0.47785 | C | 3.02162 | -0.58316 | -0.53255 | O | -3.71304 | -2.57452 | 1.60921 | N | 1.94686 | -1.39123 | -0.36783 | C | 7.31986 | 2.43173 | -0.80678 | C | 3.99609 | -2.01142 | 2.62059 | H | -3.23463 | -2.57284 | 0.72819 | C | 0.80097 | -1.54685 | -1.29189 | C | -0.40817 | 0.48877 | -0.40069 | H | -0.88557 | 2.69497 | 1.62951 | O | -0.84539 | 1.06399 | 0.58422 | C | -0.47999 | -0.99801 | -0.61174 | C | -1.85655 | -1.50333 | -1.34683 | C | -2.86695 | -0.35169 | -1.53290 | C | -2.87000 | -1.91114 | 2.52842 | O | -2.33725 | -2.58943 | -0.70833 | C | -3.95937 | -0.18285 | -0.67295 | H | -1.91436 | -2.43822 | 2.67179 | C | -2.73361 | 0.53139 | -2.61498 |
| C                                              | 6.09018                                                                                                                                                                                                                                                                                                                                                                                                                                                                                                                                                                                                                                                                                                                                                                                                                                                                                                                                                                                                                                                                                                                                                                                                                                                                                                                                                                                                                                                                                                                                                                                                                                                                                                                                                                                                                                                                                                                                                                                                                                            | 1.54399  | -0.71902 |         |          |   |          |         |         |   |         |         |          |   |          |         |         |   |          |         |         |   |         |         |         |   |         |          |         |   |         |          |         |   |         |          |         |   |         |          |          |   |          |          |         |   |         |          |          |   |         |         |          |   |         |          |         |   |          |          |         |   |         |          |          |   |          |         |          |   |          |         |         |   |          |         |         |   |          |          |          |   |          |          |          |   |          |          |          |   |          |          |         |   |          |          |          |   |          |          |          |   |          |          |         |   |          |         |          |
| C                                              | -2.02130                                                                                                                                                                                                                                                                                                                                                                                                                                                                                                                                                                                                                                                                                                                                                                                                                                                                                                                                                                                                                                                                                                                                                                                                                                                                                                                                                                                                                                                                                                                                                                                                                                                                                                                                                                                                                                                                                                                                                                                                                                           | 4.34596  | 2.24608  |         |          |   |          |         |         |   |         |         |          |   |          |         |         |   |          |         |         |   |         |         |         |   |         |          |         |   |         |          |         |   |         |          |         |   |         |          |          |   |          |          |         |   |         |          |          |   |         |         |          |   |         |          |         |   |          |          |         |   |         |          |          |   |          |         |          |   |          |         |         |   |          |         |         |   |          |          |          |   |          |          |          |   |          |          |          |   |          |          |         |   |          |          |          |   |          |          |          |   |          |          |         |   |          |         |          |
| O                                              | 5.22411                                                                                                                                                                                                                                                                                                                                                                                                                                                                                                                                                                                                                                                                                                                                                                                                                                                                                                                                                                                                                                                                                                                                                                                                                                                                                                                                                                                                                                                                                                                                                                                                                                                                                                                                                                                                                                                                                                                                                                                                                                            | 1.52132  | -1.58038 |         |          |   |          |         |         |   |         |         |          |   |          |         |         |   |          |         |         |   |         |         |         |   |         |          |         |   |         |          |         |   |         |          |         |   |         |          |          |   |          |          |         |   |         |          |          |   |         |         |          |   |         |          |         |   |          |          |         |   |         |          |          |   |          |         |          |   |          |         |         |   |          |         |         |   |          |          |          |   |          |          |          |   |          |          |          |   |          |          |         |   |          |          |          |   |          |          |          |   |          |          |         |   |          |         |          |
| O                                              | -2.06996                                                                                                                                                                                                                                                                                                                                                                                                                                                                                                                                                                                                                                                                                                                                                                                                                                                                                                                                                                                                                                                                                                                                                                                                                                                                                                                                                                                                                                                                                                                                                                                                                                                                                                                                                                                                                                                                                                                                                                                                                                           | 5.35915  | 2.93888  |         |          |   |          |         |         |   |         |         |          |   |          |         |         |   |          |         |         |   |         |         |         |   |         |          |         |   |         |          |         |   |         |          |         |   |         |          |          |   |          |          |         |   |         |          |          |   |         |         |          |   |         |          |         |   |          |          |         |   |         |          |          |   |          |         |          |   |          |         |         |   |          |         |         |   |          |          |          |   |          |          |          |   |          |          |          |   |          |          |         |   |          |          |          |   |          |          |          |   |          |          |         |   |          |         |          |
| N                                              | -0.90425                                                                                                                                                                                                                                                                                                                                                                                                                                                                                                                                                                                                                                                                                                                                                                                                                                                                                                                                                                                                                                                                                                                                                                                                                                                                                                                                                                                                                                                                                                                                                                                                                                                                                                                                                                                                                                                                                                                                                                                                                                           | 3.57600  | 2.13841  |         |          |   |          |         |         |   |         |         |          |   |          |         |         |   |          |         |         |   |         |         |         |   |         |          |         |   |         |          |         |   |         |          |         |   |         |          |          |   |          |          |         |   |         |          |          |   |         |         |          |   |         |          |         |   |          |          |         |   |         |          |          |   |          |         |          |   |          |         |         |   |          |         |         |   |          |          |          |   |          |          |          |   |          |          |          |   |          |          |         |   |          |          |          |   |          |          |          |   |          |          |         |   |          |         |          |
| O                                              | 6.08472                                                                                                                                                                                                                                                                                                                                                                                                                                                                                                                                                                                                                                                                                                                                                                                                                                                                                                                                                                                                                                                                                                                                                                                                                                                                                                                                                                                                                                                                                                                                                                                                                                                                                                                                                                                                                                                                                                                                                                                                                                            | 0.81866  | 0.39242  |         |          |   |          |         |         |   |         |         |          |   |          |         |         |   |          |         |         |   |         |         |         |   |         |          |         |   |         |          |         |   |         |          |         |   |         |          |          |   |          |          |         |   |         |          |          |   |         |         |          |   |         |          |         |   |          |          |         |   |         |          |          |   |          |         |          |   |          |         |         |   |          |         |         |   |          |          |          |   |          |          |          |   |          |          |          |   |          |          |         |   |          |          |          |   |          |          |          |   |          |          |         |   |          |         |          |
| C                                              | 3.31929                                                                                                                                                                                                                                                                                                                                                                                                                                                                                                                                                                                                                                                                                                                                                                                                                                                                                                                                                                                                                                                                                                                                                                                                                                                                                                                                                                                                                                                                                                                                                                                                                                                                                                                                                                                                                                                                                                                                                                                                                                            | -1.62003 | 1.34431  |         |          |   |          |         |         |   |         |         |          |   |          |         |         |   |          |         |         |   |         |         |         |   |         |          |         |   |         |          |         |   |         |          |         |   |         |          |          |   |          |          |         |   |         |          |          |   |         |         |          |   |         |          |         |   |          |          |         |   |         |          |          |   |          |         |          |   |          |         |         |   |          |         |         |   |          |          |          |   |          |          |          |   |          |          |          |   |          |          |         |   |          |          |          |   |          |          |          |   |          |          |         |   |          |         |          |
| C                                              | 2.12452                                                                                                                                                                                                                                                                                                                                                                                                                                                                                                                                                                                                                                                                                                                                                                                                                                                                                                                                                                                                                                                                                                                                                                                                                                                                                                                                                                                                                                                                                                                                                                                                                                                                                                                                                                                                                                                                                                                                                                                                                                            | -2.06199 | 0.83035  |         |          |   |          |         |         |   |         |         |          |   |          |         |         |   |          |         |         |   |         |         |         |   |         |          |         |   |         |          |         |   |         |          |         |   |         |          |          |   |          |          |         |   |         |          |          |   |         |         |          |   |         |          |         |   |          |          |         |   |         |          |          |   |          |         |          |   |          |         |         |   |          |         |         |   |          |          |          |   |          |          |          |   |          |          |          |   |          |          |         |   |          |          |          |   |          |          |          |   |          |          |         |   |          |         |          |
| N                                              | 3.87030                                                                                                                                                                                                                                                                                                                                                                                                                                                                                                                                                                                                                                                                                                                                                                                                                                                                                                                                                                                                                                                                                                                                                                                                                                                                                                                                                                                                                                                                                                                                                                                                                                                                                                                                                                                                                                                                                                                                                                                                                                            | -0.69356 | 0.47785  |         |          |   |          |         |         |   |         |         |          |   |          |         |         |   |          |         |         |   |         |         |         |   |         |          |         |   |         |          |         |   |         |          |         |   |         |          |          |   |          |          |         |   |         |          |          |   |         |         |          |   |         |          |         |   |          |          |         |   |         |          |          |   |          |         |          |   |          |         |         |   |          |         |         |   |          |          |          |   |          |          |          |   |          |          |          |   |          |          |         |   |          |          |          |   |          |          |          |   |          |          |         |   |          |         |          |
| C                                              | 3.02162                                                                                                                                                                                                                                                                                                                                                                                                                                                                                                                                                                                                                                                                                                                                                                                                                                                                                                                                                                                                                                                                                                                                                                                                                                                                                                                                                                                                                                                                                                                                                                                                                                                                                                                                                                                                                                                                                                                                                                                                                                            | -0.58316 | -0.53255 |         |          |   |          |         |         |   |         |         |          |   |          |         |         |   |          |         |         |   |         |         |         |   |         |          |         |   |         |          |         |   |         |          |         |   |         |          |          |   |          |          |         |   |         |          |          |   |         |         |          |   |         |          |         |   |          |          |         |   |         |          |          |   |          |         |          |   |          |         |         |   |          |         |         |   |          |          |          |   |          |          |          |   |          |          |          |   |          |          |         |   |          |          |          |   |          |          |          |   |          |          |         |   |          |         |          |
| O                                              | -3.71304                                                                                                                                                                                                                                                                                                                                                                                                                                                                                                                                                                                                                                                                                                                                                                                                                                                                                                                                                                                                                                                                                                                                                                                                                                                                                                                                                                                                                                                                                                                                                                                                                                                                                                                                                                                                                                                                                                                                                                                                                                           | -2.57452 | 1.60921  |         |          |   |          |         |         |   |         |         |          |   |          |         |         |   |          |         |         |   |         |         |         |   |         |          |         |   |         |          |         |   |         |          |         |   |         |          |          |   |          |          |         |   |         |          |          |   |         |         |          |   |         |          |         |   |          |          |         |   |         |          |          |   |          |         |          |   |          |         |         |   |          |         |         |   |          |          |          |   |          |          |          |   |          |          |          |   |          |          |         |   |          |          |          |   |          |          |          |   |          |          |         |   |          |         |          |
| N                                              | 1.94686                                                                                                                                                                                                                                                                                                                                                                                                                                                                                                                                                                                                                                                                                                                                                                                                                                                                                                                                                                                                                                                                                                                                                                                                                                                                                                                                                                                                                                                                                                                                                                                                                                                                                                                                                                                                                                                                                                                                                                                                                                            | -1.39123 | -0.36783 |         |          |   |          |         |         |   |         |         |          |   |          |         |         |   |          |         |         |   |         |         |         |   |         |          |         |   |         |          |         |   |         |          |         |   |         |          |          |   |          |          |         |   |         |          |          |   |         |         |          |   |         |          |         |   |          |          |         |   |         |          |          |   |          |         |          |   |          |         |         |   |          |         |         |   |          |          |          |   |          |          |          |   |          |          |          |   |          |          |         |   |          |          |          |   |          |          |          |   |          |          |         |   |          |         |          |
| C                                              | 7.31986                                                                                                                                                                                                                                                                                                                                                                                                                                                                                                                                                                                                                                                                                                                                                                                                                                                                                                                                                                                                                                                                                                                                                                                                                                                                                                                                                                                                                                                                                                                                                                                                                                                                                                                                                                                                                                                                                                                                                                                                                                            | 2.43173  | -0.80678 |         |          |   |          |         |         |   |         |         |          |   |          |         |         |   |          |         |         |   |         |         |         |   |         |          |         |   |         |          |         |   |         |          |         |   |         |          |          |   |          |          |         |   |         |          |          |   |         |         |          |   |         |          |         |   |          |          |         |   |         |          |          |   |          |         |          |   |          |         |         |   |          |         |         |   |          |          |          |   |          |          |          |   |          |          |          |   |          |          |         |   |          |          |          |   |          |          |          |   |          |          |         |   |          |         |          |
| C                                              | 3.99609                                                                                                                                                                                                                                                                                                                                                                                                                                                                                                                                                                                                                                                                                                                                                                                                                                                                                                                                                                                                                                                                                                                                                                                                                                                                                                                                                                                                                                                                                                                                                                                                                                                                                                                                                                                                                                                                                                                                                                                                                                            | -2.01142 | 2.62059  |         |          |   |          |         |         |   |         |         |          |   |          |         |         |   |          |         |         |   |         |         |         |   |         |          |         |   |         |          |         |   |         |          |         |   |         |          |          |   |          |          |         |   |         |          |          |   |         |         |          |   |         |          |         |   |          |          |         |   |         |          |          |   |          |         |          |   |          |         |         |   |          |         |         |   |          |          |          |   |          |          |          |   |          |          |          |   |          |          |         |   |          |          |          |   |          |          |          |   |          |          |         |   |          |         |          |
| H                                              | -3.23463                                                                                                                                                                                                                                                                                                                                                                                                                                                                                                                                                                                                                                                                                                                                                                                                                                                                                                                                                                                                                                                                                                                                                                                                                                                                                                                                                                                                                                                                                                                                                                                                                                                                                                                                                                                                                                                                                                                                                                                                                                           | -2.57284 | 0.72819  |         |          |   |          |         |         |   |         |         |          |   |          |         |         |   |          |         |         |   |         |         |         |   |         |          |         |   |         |          |         |   |         |          |         |   |         |          |          |   |          |          |         |   |         |          |          |   |         |         |          |   |         |          |         |   |          |          |         |   |         |          |          |   |          |         |          |   |          |         |         |   |          |         |         |   |          |          |          |   |          |          |          |   |          |          |          |   |          |          |         |   |          |          |          |   |          |          |          |   |          |          |         |   |          |         |          |
| C                                              | 0.80097                                                                                                                                                                                                                                                                                                                                                                                                                                                                                                                                                                                                                                                                                                                                                                                                                                                                                                                                                                                                                                                                                                                                                                                                                                                                                                                                                                                                                                                                                                                                                                                                                                                                                                                                                                                                                                                                                                                                                                                                                                            | -1.54685 | -1.29189 |         |          |   |          |         |         |   |         |         |          |   |          |         |         |   |          |         |         |   |         |         |         |   |         |          |         |   |         |          |         |   |         |          |         |   |         |          |          |   |          |          |         |   |         |          |          |   |         |         |          |   |         |          |         |   |          |          |         |   |         |          |          |   |          |         |          |   |          |         |         |   |          |         |         |   |          |          |          |   |          |          |          |   |          |          |          |   |          |          |         |   |          |          |          |   |          |          |          |   |          |          |         |   |          |         |          |
| C                                              | -0.40817                                                                                                                                                                                                                                                                                                                                                                                                                                                                                                                                                                                                                                                                                                                                                                                                                                                                                                                                                                                                                                                                                                                                                                                                                                                                                                                                                                                                                                                                                                                                                                                                                                                                                                                                                                                                                                                                                                                                                                                                                                           | 0.48877  | -0.40069 |         |          |   |          |         |         |   |         |         |          |   |          |         |         |   |          |         |         |   |         |         |         |   |         |          |         |   |         |          |         |   |         |          |         |   |         |          |          |   |          |          |         |   |         |          |          |   |         |         |          |   |         |          |         |   |          |          |         |   |         |          |          |   |          |         |          |   |          |         |         |   |          |         |         |   |          |          |          |   |          |          |          |   |          |          |          |   |          |          |         |   |          |          |          |   |          |          |          |   |          |          |         |   |          |         |          |
| H                                              | -0.88557                                                                                                                                                                                                                                                                                                                                                                                                                                                                                                                                                                                                                                                                                                                                                                                                                                                                                                                                                                                                                                                                                                                                                                                                                                                                                                                                                                                                                                                                                                                                                                                                                                                                                                                                                                                                                                                                                                                                                                                                                                           | 2.69497  | 1.62951  |         |          |   |          |         |         |   |         |         |          |   |          |         |         |   |          |         |         |   |         |         |         |   |         |          |         |   |         |          |         |   |         |          |         |   |         |          |          |   |          |          |         |   |         |          |          |   |         |         |          |   |         |          |         |   |          |          |         |   |         |          |          |   |          |         |          |   |          |         |         |   |          |         |         |   |          |          |          |   |          |          |          |   |          |          |          |   |          |          |         |   |          |          |          |   |          |          |          |   |          |          |         |   |          |         |          |
| O                                              | -0.84539                                                                                                                                                                                                                                                                                                                                                                                                                                                                                                                                                                                                                                                                                                                                                                                                                                                                                                                                                                                                                                                                                                                                                                                                                                                                                                                                                                                                                                                                                                                                                                                                                                                                                                                                                                                                                                                                                                                                                                                                                                           | 1.06399  | 0.58422  |         |          |   |          |         |         |   |         |         |          |   |          |         |         |   |          |         |         |   |         |         |         |   |         |          |         |   |         |          |         |   |         |          |         |   |         |          |          |   |          |          |         |   |         |          |          |   |         |         |          |   |         |          |         |   |          |          |         |   |         |          |          |   |          |         |          |   |          |         |         |   |          |         |         |   |          |          |          |   |          |          |          |   |          |          |          |   |          |          |         |   |          |          |          |   |          |          |          |   |          |          |         |   |          |         |          |
| C                                              | -0.47999                                                                                                                                                                                                                                                                                                                                                                                                                                                                                                                                                                                                                                                                                                                                                                                                                                                                                                                                                                                                                                                                                                                                                                                                                                                                                                                                                                                                                                                                                                                                                                                                                                                                                                                                                                                                                                                                                                                                                                                                                                           | -0.99801 | -0.61174 |         |          |   |          |         |         |   |         |         |          |   |          |         |         |   |          |         |         |   |         |         |         |   |         |          |         |   |         |          |         |   |         |          |         |   |         |          |          |   |          |          |         |   |         |          |          |   |         |         |          |   |         |          |         |   |          |          |         |   |         |          |          |   |          |         |          |   |          |         |         |   |          |         |         |   |          |          |          |   |          |          |          |   |          |          |          |   |          |          |         |   |          |          |          |   |          |          |          |   |          |          |         |   |          |         |          |
| C                                              | -1.85655                                                                                                                                                                                                                                                                                                                                                                                                                                                                                                                                                                                                                                                                                                                                                                                                                                                                                                                                                                                                                                                                                                                                                                                                                                                                                                                                                                                                                                                                                                                                                                                                                                                                                                                                                                                                                                                                                                                                                                                                                                           | -1.50333 | -1.34683 |         |          |   |          |         |         |   |         |         |          |   |          |         |         |   |          |         |         |   |         |         |         |   |         |          |         |   |         |          |         |   |         |          |         |   |         |          |          |   |          |          |         |   |         |          |          |   |         |         |          |   |         |          |         |   |          |          |         |   |         |          |          |   |          |         |          |   |          |         |         |   |          |         |         |   |          |          |          |   |          |          |          |   |          |          |          |   |          |          |         |   |          |          |          |   |          |          |          |   |          |          |         |   |          |         |          |
| C                                              | -2.86695                                                                                                                                                                                                                                                                                                                                                                                                                                                                                                                                                                                                                                                                                                                                                                                                                                                                                                                                                                                                                                                                                                                                                                                                                                                                                                                                                                                                                                                                                                                                                                                                                                                                                                                                                                                                                                                                                                                                                                                                                                           | -0.35169 | -1.53290 |         |          |   |          |         |         |   |         |         |          |   |          |         |         |   |          |         |         |   |         |         |         |   |         |          |         |   |         |          |         |   |         |          |         |   |         |          |          |   |          |          |         |   |         |          |          |   |         |         |          |   |         |          |         |   |          |          |         |   |         |          |          |   |          |         |          |   |          |         |         |   |          |         |         |   |          |          |          |   |          |          |          |   |          |          |          |   |          |          |         |   |          |          |          |   |          |          |          |   |          |          |         |   |          |         |          |
| C                                              | -2.87000                                                                                                                                                                                                                                                                                                                                                                                                                                                                                                                                                                                                                                                                                                                                                                                                                                                                                                                                                                                                                                                                                                                                                                                                                                                                                                                                                                                                                                                                                                                                                                                                                                                                                                                                                                                                                                                                                                                                                                                                                                           | -1.91114 | 2.52842  |         |          |   |          |         |         |   |         |         |          |   |          |         |         |   |          |         |         |   |         |         |         |   |         |          |         |   |         |          |         |   |         |          |         |   |         |          |          |   |          |          |         |   |         |          |          |   |         |         |          |   |         |          |         |   |          |          |         |   |         |          |          |   |          |         |          |   |          |         |         |   |          |         |         |   |          |          |          |   |          |          |          |   |          |          |          |   |          |          |         |   |          |          |          |   |          |          |          |   |          |          |         |   |          |         |          |
| O                                              | -2.33725                                                                                                                                                                                                                                                                                                                                                                                                                                                                                                                                                                                                                                                                                                                                                                                                                                                                                                                                                                                                                                                                                                                                                                                                                                                                                                                                                                                                                                                                                                                                                                                                                                                                                                                                                                                                                                                                                                                                                                                                                                           | -2.58943 | -0.70833 |         |          |   |          |         |         |   |         |         |          |   |          |         |         |   |          |         |         |   |         |         |         |   |         |          |         |   |         |          |         |   |         |          |         |   |         |          |          |   |          |          |         |   |         |          |          |   |         |         |          |   |         |          |         |   |          |          |         |   |         |          |          |   |          |         |          |   |          |         |         |   |          |         |         |   |          |          |          |   |          |          |          |   |          |          |          |   |          |          |         |   |          |          |          |   |          |          |          |   |          |          |         |   |          |         |          |
| C                                              | -3.95937                                                                                                                                                                                                                                                                                                                                                                                                                                                                                                                                                                                                                                                                                                                                                                                                                                                                                                                                                                                                                                                                                                                                                                                                                                                                                                                                                                                                                                                                                                                                                                                                                                                                                                                                                                                                                                                                                                                                                                                                                                           | -0.18285 | -0.67295 |         |          |   |          |         |         |   |         |         |          |   |          |         |         |   |          |         |         |   |         |         |         |   |         |          |         |   |         |          |         |   |         |          |         |   |         |          |          |   |          |          |         |   |         |          |          |   |         |         |          |   |         |          |         |   |          |          |         |   |         |          |          |   |          |         |          |   |          |         |         |   |          |         |         |   |          |          |          |   |          |          |          |   |          |          |          |   |          |          |         |   |          |          |          |   |          |          |          |   |          |          |         |   |          |         |          |
| H                                              | -1.91436                                                                                                                                                                                                                                                                                                                                                                                                                                                                                                                                                                                                                                                                                                                                                                                                                                                                                                                                                                                                                                                                                                                                                                                                                                                                                                                                                                                                                                                                                                                                                                                                                                                                                                                                                                                                                                                                                                                                                                                                                                           | -2.43822 | 2.67179  |         |          |   |          |         |         |   |         |         |          |   |          |         |         |   |          |         |         |   |         |         |         |   |         |          |         |   |         |          |         |   |         |          |         |   |         |          |          |   |          |          |         |   |         |          |          |   |         |         |          |   |         |          |         |   |          |          |         |   |         |          |          |   |          |         |          |   |          |         |         |   |          |         |         |   |          |          |          |   |          |          |          |   |          |          |          |   |          |          |         |   |          |          |          |   |          |          |          |   |          |          |         |   |          |         |          |
| C                                              | -2.73361                                                                                                                                                                                                                                                                                                                                                                                                                                                                                                                                                                                                                                                                                                                                                                                                                                                                                                                                                                                                                                                                                                                                                                                                                                                                                                                                                                                                                                                                                                                                                                                                                                                                                                                                                                                                                                                                                                                                                                                                                                           | 0.53139  | -2.61498 |         |          |   |          |         |         |   |         |         |          |   |          |         |         |   |          |         |         |   |         |         |         |   |         |          |         |   |         |          |         |   |         |          |         |   |         |          |          |   |          |          |         |   |         |          |          |   |         |         |          |   |         |          |         |   |          |          |         |   |         |          |          |   |          |         |          |   |          |         |         |   |          |         |         |   |          |          |          |   |          |          |          |   |          |          |          |   |          |          |         |   |          |          |          |   |          |          |          |   |          |          |         |   |          |         |          |



|   |          |          |          |
|---|----------|----------|----------|
| H | -3.38848 | -1.86734 | 3.49526  |
| C | -4.87141 | 0.85558  | -0.87755 |
| C | -3.21183 | 3.87140  | 1.42172  |
| C | -3.64135 | 1.57204  | -2.82114 |
| H | -3.04381 | 2.92001  | 0.91073  |
| C | -4.71712 | 1.74109  | -1.94654 |
| H | -3.45625 | 4.63871  | 0.67897  |
| H | -0.57286 | -1.42361 | 0.38756  |
| H | -4.07805 | 3.77576  | 2.08402  |
| O | 0.15263  | 1.15725  | -1.43878 |
| C | 0.13552  | 2.58847  | -1.35441 |
| C | 0.74619  | -3.00336 | -1.77623 |
| H | -3.51746 | 2.23969  | -3.67200 |
| H | -5.43275 | 2.54536  | -2.10413 |
| H | -5.71381 | 0.96825  | -0.19797 |
| H | -4.10730 | -0.88016 | 0.14539  |
| H | -1.90678 | 0.39605  | -3.31010 |
| H | -0.02016 | -3.12324 | -2.54548 |
| H | 0.51439  | -3.69209 | -0.96096 |
| H | 1.71697  | -3.26690 | -2.21233 |
| H | -1.52166 | -1.72701 | -2.38713 |
| H | 1.03683  | -0.90526 | -2.14516 |
| H | 1.39226  | -2.77430 | 1.18775  |
| H | 4.98877  | -2.44082 | 2.43361  |
| H | 4.13775  | -1.14601 | 3.28039  |
| H | 3.40126  | -2.75446 | 3.16102  |
| H | 3.16116  | 0.07207  | -1.38053 |
| H | 8.22817  | 1.82183  | -0.75259 |
| H | 0.68600  | 2.93886  | -2.22882 |
| H | -0.89444 | 2.95495  | -1.37893 |
| H | 7.30537  | 2.99624  | -1.74050 |
| H | 0.62037  | 2.93330  | -0.43800 |
| H | 7.34245  | 3.12192  | 0.04380  |
| O | -0.73996 | -4.02581 | 0.83870  |
| H | -1.32990 | -3.50366 | 0.20158  |
| C | -1.48376 | -5.13424 | 1.29889  |
| H | -0.92342 | -5.61330 | 2.11294  |
| H | -1.64094 | -5.89314 | 0.51159  |
| H | -2.46804 | -4.83064 | 1.68149  |
| H | 5.23888  | 0.23228  | 0.43415  |
| H | -0.11557 | 3.82202  | 2.72017  |
| H | -2.63865 | -0.87681 | 2.22336  |

Optimized Molecular Properties for **T9-TS3**

|                                                |                                                                                                                                                                                                                                                                                                                                                                                                                                                                                                                                                                                                                                                                                                                                                                                                                                                                                                                                                                                                                                                                                                                                                                                                                                                                                                                                                                                                                                                                                                                                                                                                                                                                                                                                                                                                                                                                                                                                                              |          |          |         |         |   |         |         |          |   |          |         |         |   |         |         |          |   |         |         |          |   |          |         |          |   |          |          |          |   |          |          |          |   |          |          |          |   |          |          |         |   |         |          |          |   |          |          |         |   |          |         |         |   |          |          |          |   |         |          |          |   |          |          |         |   |         |         |          |   |         |         |          |   |         |         |          |   |         |          |         |   |         |          |         |   |         |          |         |   |         |          |          |   |         |          |         |   |         |          |         |   |         |          |          |
|------------------------------------------------|--------------------------------------------------------------------------------------------------------------------------------------------------------------------------------------------------------------------------------------------------------------------------------------------------------------------------------------------------------------------------------------------------------------------------------------------------------------------------------------------------------------------------------------------------------------------------------------------------------------------------------------------------------------------------------------------------------------------------------------------------------------------------------------------------------------------------------------------------------------------------------------------------------------------------------------------------------------------------------------------------------------------------------------------------------------------------------------------------------------------------------------------------------------------------------------------------------------------------------------------------------------------------------------------------------------------------------------------------------------------------------------------------------------------------------------------------------------------------------------------------------------------------------------------------------------------------------------------------------------------------------------------------------------------------------------------------------------------------------------------------------------------------------------------------------------------------------------------------------------------------------------------------------------------------------------------------------------|----------|----------|---------|---------|---|---------|---------|----------|---|----------|---------|---------|---|---------|---------|----------|---|---------|---------|----------|---|----------|---------|----------|---|----------|----------|----------|---|----------|----------|----------|---|----------|----------|----------|---|----------|----------|---------|---|---------|----------|----------|---|----------|----------|---------|---|----------|---------|---------|---|----------|----------|----------|---|---------|----------|----------|---|----------|----------|---------|---|---------|---------|----------|---|---------|---------|----------|---|---------|---------|----------|---|---------|----------|---------|---|---------|----------|---------|---|---------|----------|---------|---|---------|----------|----------|---|---------|----------|---------|---|---------|----------|---------|---|---------|----------|----------|
| Number of<br>(-)<br>Vibrational<br>Frequencies | 1 (-1102.6361)                                                                                                                                                                                                                                                                                                                                                                                                                                                                                                                                                                                                                                                                                                                                                                                                                                                                                                                                                                                                                                                                                                                                                                                                                                                                                                                                                                                                                                                                                                                                                                                                                                                                                                                                                                                                                                                                                                                                               |          |          |         |         |   |         |         |          |   |          |         |         |   |         |         |          |   |         |         |          |   |          |         |          |   |          |          |          |   |          |          |          |   |          |          |          |   |          |          |         |   |         |          |          |   |          |          |         |   |          |         |         |   |          |          |          |   |         |          |          |   |          |          |         |   |         |         |          |   |         |         |          |   |         |         |          |   |         |          |         |   |         |          |         |   |         |          |         |   |         |          |          |   |         |          |         |   |         |          |         |   |         |          |          |
| Absolute<br>Energies<br>(Hartrees)             | <p><b>B3LYP/6-31G(d)</b></p> <p>There are 22 positive frequencies below 100 cm<sup>-1</sup>.</p> <p>Zero-point correction: 0.570448 hartree<br/>         Enthalpy correction: 0.612656 hartree<br/>         Free Energy correction: 0.486814 hartree<br/>         Quasiharmonic Free Energy correction: 0.502634 hartree</p> <p>SCF Energy: -1626.141501 hartree<br/>         SCF Energy + ZPVE: -1625.571053 hartree<br/>         Enthalpy: -1625.528845 hartree<br/>         Free Energy: -1625.654687 hartree</p> <p>Free Energy with quasiharmonic correction: -1625.638866 hartree<br/>         (correction: 9.93 kcal/mol)</p> <p><b>B3LYP-D3/6-311+G(d,p)</b></p> <p>SCF Done: E(RB3LYP) = -1626.74314329 A.U.</p>                                                                                                                                                                                                                                                                                                                                                                                                                                                                                                                                                                                                                                                                                                                                                                                                                                                                                                                                                                                                                                                                                                                                                                                                                                    |          |          |         |         |   |         |         |          |   |          |         |         |   |         |         |          |   |         |         |          |   |          |         |          |   |          |          |          |   |          |          |          |   |          |          |          |   |          |          |         |   |         |          |          |   |          |          |         |   |          |         |         |   |          |          |          |   |         |          |          |   |          |          |         |   |         |         |          |   |         |         |          |   |         |         |          |   |         |          |         |   |         |          |         |   |         |          |         |   |         |          |          |   |         |          |         |   |         |          |         |   |         |          |          |
| Cartesian<br>Coordinates                       | <p>69</p> <p>spD3-TS3-T9.out Energy: -1020796.7260453</p> <table> <tr><td>C</td><td>-6.34553</td><td>1.88738</td><td>0.67137</td></tr> <tr><td>C</td><td>3.78149</td><td>3.44207</td><td>-1.81031</td></tr> <tr><td>O</td><td>-5.43929</td><td>1.91038</td><td>1.49047</td></tr> <tr><td>O</td><td>4.37418</td><td>4.27875</td><td>-2.48801</td></tr> <tr><td>N</td><td>2.86365</td><td>2.58251</td><td>-2.32684</td></tr> <tr><td>O</td><td>-6.40111</td><td>1.09328</td><td>-0.38940</td></tr> <tr><td>C</td><td>-3.76687</td><td>-1.45048</td><td>-1.33618</td></tr> <tr><td>C</td><td>-2.54374</td><td>-1.88692</td><td>-0.88804</td></tr> <tr><td>N</td><td>-4.22745</td><td>-0.45278</td><td>-0.49649</td></tr> <tr><td>C</td><td>-3.29569</td><td>-0.29631</td><td>0.43146</td></tr> <tr><td>O</td><td>4.86629</td><td>-2.06767</td><td>-1.16835</td></tr> <tr><td>N</td><td>-2.25305</td><td>-1.13623</td><td>0.23789</td></tr> <tr><td>C</td><td>-7.56276</td><td>2.79323</td><td>0.76240</td></tr> <tr><td>C</td><td>-4.54913</td><td>-1.90814</td><td>-2.52750</td></tr> <tr><td>H</td><td>4.01969</td><td>-2.25141</td><td>-0.70656</td></tr> <tr><td>C</td><td>-1.08383</td><td>-1.28829</td><td>1.14547</td></tr> <tr><td>C</td><td>0.52582</td><td>0.19931</td><td>-0.13786</td></tr> <tr><td>H</td><td>2.39391</td><td>1.86513</td><td>-1.77251</td></tr> <tr><td>O</td><td>1.57262</td><td>0.55763</td><td>-0.68369</td></tr> <tr><td>C</td><td>0.25054</td><td>-1.13865</td><td>0.38179</td></tr> <tr><td>C</td><td>1.50893</td><td>-1.81582</td><td>1.01458</td></tr> <tr><td>C</td><td>2.31924</td><td>-0.91682</td><td>1.94514</td></tr> <tr><td>C</td><td>4.55415</td><td>-1.21943</td><td>-2.25701</td></tr> <tr><td>O</td><td>2.36171</td><td>-2.39439</td><td>0.02706</td></tr> <tr><td>C</td><td>3.63259</td><td>-0.52179</td><td>1.66462</td></tr> <tr><td>H</td><td>3.99369</td><td>-1.74238</td><td>-3.05118</td></tr> </table> | C        | -6.34553 | 1.88738 | 0.67137 | C | 3.78149 | 3.44207 | -1.81031 | O | -5.43929 | 1.91038 | 1.49047 | O | 4.37418 | 4.27875 | -2.48801 | N | 2.86365 | 2.58251 | -2.32684 | O | -6.40111 | 1.09328 | -0.38940 | C | -3.76687 | -1.45048 | -1.33618 | C | -2.54374 | -1.88692 | -0.88804 | N | -4.22745 | -0.45278 | -0.49649 | C | -3.29569 | -0.29631 | 0.43146 | O | 4.86629 | -2.06767 | -1.16835 | N | -2.25305 | -1.13623 | 0.23789 | C | -7.56276 | 2.79323 | 0.76240 | C | -4.54913 | -1.90814 | -2.52750 | H | 4.01969 | -2.25141 | -0.70656 | C | -1.08383 | -1.28829 | 1.14547 | C | 0.52582 | 0.19931 | -0.13786 | H | 2.39391 | 1.86513 | -1.77251 | O | 1.57262 | 0.55763 | -0.68369 | C | 0.25054 | -1.13865 | 0.38179 | C | 1.50893 | -1.81582 | 1.01458 | C | 2.31924 | -0.91682 | 1.94514 | C | 4.55415 | -1.21943 | -2.25701 | O | 2.36171 | -2.39439 | 0.02706 | C | 3.63259 | -0.52179 | 1.66462 | H | 3.99369 | -1.74238 | -3.05118 |
| C                                              | -6.34553                                                                                                                                                                                                                                                                                                                                                                                                                                                                                                                                                                                                                                                                                                                                                                                                                                                                                                                                                                                                                                                                                                                                                                                                                                                                                                                                                                                                                                                                                                                                                                                                                                                                                                                                                                                                                                                                                                                                                     | 1.88738  | 0.67137  |         |         |   |         |         |          |   |          |         |         |   |         |         |          |   |         |         |          |   |          |         |          |   |          |          |          |   |          |          |          |   |          |          |          |   |          |          |         |   |         |          |          |   |          |          |         |   |          |         |         |   |          |          |          |   |         |          |          |   |          |          |         |   |         |         |          |   |         |         |          |   |         |         |          |   |         |          |         |   |         |          |         |   |         |          |         |   |         |          |          |   |         |          |         |   |         |          |         |   |         |          |          |
| C                                              | 3.78149                                                                                                                                                                                                                                                                                                                                                                                                                                                                                                                                                                                                                                                                                                                                                                                                                                                                                                                                                                                                                                                                                                                                                                                                                                                                                                                                                                                                                                                                                                                                                                                                                                                                                                                                                                                                                                                                                                                                                      | 3.44207  | -1.81031 |         |         |   |         |         |          |   |          |         |         |   |         |         |          |   |         |         |          |   |          |         |          |   |          |          |          |   |          |          |          |   |          |          |          |   |          |          |         |   |         |          |          |   |          |          |         |   |          |         |         |   |          |          |          |   |         |          |          |   |          |          |         |   |         |         |          |   |         |         |          |   |         |         |          |   |         |          |         |   |         |          |         |   |         |          |         |   |         |          |          |   |         |          |         |   |         |          |         |   |         |          |          |
| O                                              | -5.43929                                                                                                                                                                                                                                                                                                                                                                                                                                                                                                                                                                                                                                                                                                                                                                                                                                                                                                                                                                                                                                                                                                                                                                                                                                                                                                                                                                                                                                                                                                                                                                                                                                                                                                                                                                                                                                                                                                                                                     | 1.91038  | 1.49047  |         |         |   |         |         |          |   |          |         |         |   |         |         |          |   |         |         |          |   |          |         |          |   |          |          |          |   |          |          |          |   |          |          |          |   |          |          |         |   |         |          |          |   |          |          |         |   |          |         |         |   |          |          |          |   |         |          |          |   |          |          |         |   |         |         |          |   |         |         |          |   |         |         |          |   |         |          |         |   |         |          |         |   |         |          |         |   |         |          |          |   |         |          |         |   |         |          |         |   |         |          |          |
| O                                              | 4.37418                                                                                                                                                                                                                                                                                                                                                                                                                                                                                                                                                                                                                                                                                                                                                                                                                                                                                                                                                                                                                                                                                                                                                                                                                                                                                                                                                                                                                                                                                                                                                                                                                                                                                                                                                                                                                                                                                                                                                      | 4.27875  | -2.48801 |         |         |   |         |         |          |   |          |         |         |   |         |         |          |   |         |         |          |   |          |         |          |   |          |          |          |   |          |          |          |   |          |          |          |   |          |          |         |   |         |          |          |   |          |          |         |   |          |         |         |   |          |          |          |   |         |          |          |   |          |          |         |   |         |         |          |   |         |         |          |   |         |         |          |   |         |          |         |   |         |          |         |   |         |          |         |   |         |          |          |   |         |          |         |   |         |          |         |   |         |          |          |
| N                                              | 2.86365                                                                                                                                                                                                                                                                                                                                                                                                                                                                                                                                                                                                                                                                                                                                                                                                                                                                                                                                                                                                                                                                                                                                                                                                                                                                                                                                                                                                                                                                                                                                                                                                                                                                                                                                                                                                                                                                                                                                                      | 2.58251  | -2.32684 |         |         |   |         |         |          |   |          |         |         |   |         |         |          |   |         |         |          |   |          |         |          |   |          |          |          |   |          |          |          |   |          |          |          |   |          |          |         |   |         |          |          |   |          |          |         |   |          |         |         |   |          |          |          |   |         |          |          |   |          |          |         |   |         |         |          |   |         |         |          |   |         |         |          |   |         |          |         |   |         |          |         |   |         |          |         |   |         |          |          |   |         |          |         |   |         |          |         |   |         |          |          |
| O                                              | -6.40111                                                                                                                                                                                                                                                                                                                                                                                                                                                                                                                                                                                                                                                                                                                                                                                                                                                                                                                                                                                                                                                                                                                                                                                                                                                                                                                                                                                                                                                                                                                                                                                                                                                                                                                                                                                                                                                                                                                                                     | 1.09328  | -0.38940 |         |         |   |         |         |          |   |          |         |         |   |         |         |          |   |         |         |          |   |          |         |          |   |          |          |          |   |          |          |          |   |          |          |          |   |          |          |         |   |         |          |          |   |          |          |         |   |          |         |         |   |          |          |          |   |         |          |          |   |          |          |         |   |         |         |          |   |         |         |          |   |         |         |          |   |         |          |         |   |         |          |         |   |         |          |         |   |         |          |          |   |         |          |         |   |         |          |         |   |         |          |          |
| C                                              | -3.76687                                                                                                                                                                                                                                                                                                                                                                                                                                                                                                                                                                                                                                                                                                                                                                                                                                                                                                                                                                                                                                                                                                                                                                                                                                                                                                                                                                                                                                                                                                                                                                                                                                                                                                                                                                                                                                                                                                                                                     | -1.45048 | -1.33618 |         |         |   |         |         |          |   |          |         |         |   |         |         |          |   |         |         |          |   |          |         |          |   |          |          |          |   |          |          |          |   |          |          |          |   |          |          |         |   |         |          |          |   |          |          |         |   |          |         |         |   |          |          |          |   |         |          |          |   |          |          |         |   |         |         |          |   |         |         |          |   |         |         |          |   |         |          |         |   |         |          |         |   |         |          |         |   |         |          |          |   |         |          |         |   |         |          |         |   |         |          |          |
| C                                              | -2.54374                                                                                                                                                                                                                                                                                                                                                                                                                                                                                                                                                                                                                                                                                                                                                                                                                                                                                                                                                                                                                                                                                                                                                                                                                                                                                                                                                                                                                                                                                                                                                                                                                                                                                                                                                                                                                                                                                                                                                     | -1.88692 | -0.88804 |         |         |   |         |         |          |   |          |         |         |   |         |         |          |   |         |         |          |   |          |         |          |   |          |          |          |   |          |          |          |   |          |          |          |   |          |          |         |   |         |          |          |   |          |          |         |   |          |         |         |   |          |          |          |   |         |          |          |   |          |          |         |   |         |         |          |   |         |         |          |   |         |         |          |   |         |          |         |   |         |          |         |   |         |          |         |   |         |          |          |   |         |          |         |   |         |          |         |   |         |          |          |
| N                                              | -4.22745                                                                                                                                                                                                                                                                                                                                                                                                                                                                                                                                                                                                                                                                                                                                                                                                                                                                                                                                                                                                                                                                                                                                                                                                                                                                                                                                                                                                                                                                                                                                                                                                                                                                                                                                                                                                                                                                                                                                                     | -0.45278 | -0.49649 |         |         |   |         |         |          |   |          |         |         |   |         |         |          |   |         |         |          |   |          |         |          |   |          |          |          |   |          |          |          |   |          |          |          |   |          |          |         |   |         |          |          |   |          |          |         |   |          |         |         |   |          |          |          |   |         |          |          |   |          |          |         |   |         |         |          |   |         |         |          |   |         |         |          |   |         |          |         |   |         |          |         |   |         |          |         |   |         |          |          |   |         |          |         |   |         |          |         |   |         |          |          |
| C                                              | -3.29569                                                                                                                                                                                                                                                                                                                                                                                                                                                                                                                                                                                                                                                                                                                                                                                                                                                                                                                                                                                                                                                                                                                                                                                                                                                                                                                                                                                                                                                                                                                                                                                                                                                                                                                                                                                                                                                                                                                                                     | -0.29631 | 0.43146  |         |         |   |         |         |          |   |          |         |         |   |         |         |          |   |         |         |          |   |          |         |          |   |          |          |          |   |          |          |          |   |          |          |          |   |          |          |         |   |         |          |          |   |          |          |         |   |          |         |         |   |          |          |          |   |         |          |          |   |          |          |         |   |         |         |          |   |         |         |          |   |         |         |          |   |         |          |         |   |         |          |         |   |         |          |         |   |         |          |          |   |         |          |         |   |         |          |         |   |         |          |          |
| O                                              | 4.86629                                                                                                                                                                                                                                                                                                                                                                                                                                                                                                                                                                                                                                                                                                                                                                                                                                                                                                                                                                                                                                                                                                                                                                                                                                                                                                                                                                                                                                                                                                                                                                                                                                                                                                                                                                                                                                                                                                                                                      | -2.06767 | -1.16835 |         |         |   |         |         |          |   |          |         |         |   |         |         |          |   |         |         |          |   |          |         |          |   |          |          |          |   |          |          |          |   |          |          |          |   |          |          |         |   |         |          |          |   |          |          |         |   |          |         |         |   |          |          |          |   |         |          |          |   |          |          |         |   |         |         |          |   |         |         |          |   |         |         |          |   |         |          |         |   |         |          |         |   |         |          |         |   |         |          |          |   |         |          |         |   |         |          |         |   |         |          |          |
| N                                              | -2.25305                                                                                                                                                                                                                                                                                                                                                                                                                                                                                                                                                                                                                                                                                                                                                                                                                                                                                                                                                                                                                                                                                                                                                                                                                                                                                                                                                                                                                                                                                                                                                                                                                                                                                                                                                                                                                                                                                                                                                     | -1.13623 | 0.23789  |         |         |   |         |         |          |   |          |         |         |   |         |         |          |   |         |         |          |   |          |         |          |   |          |          |          |   |          |          |          |   |          |          |          |   |          |          |         |   |         |          |          |   |          |          |         |   |          |         |         |   |          |          |          |   |         |          |          |   |          |          |         |   |         |         |          |   |         |         |          |   |         |         |          |   |         |          |         |   |         |          |         |   |         |          |         |   |         |          |          |   |         |          |         |   |         |          |         |   |         |          |          |
| C                                              | -7.56276                                                                                                                                                                                                                                                                                                                                                                                                                                                                                                                                                                                                                                                                                                                                                                                                                                                                                                                                                                                                                                                                                                                                                                                                                                                                                                                                                                                                                                                                                                                                                                                                                                                                                                                                                                                                                                                                                                                                                     | 2.79323  | 0.76240  |         |         |   |         |         |          |   |          |         |         |   |         |         |          |   |         |         |          |   |          |         |          |   |          |          |          |   |          |          |          |   |          |          |          |   |          |          |         |   |         |          |          |   |          |          |         |   |          |         |         |   |          |          |          |   |         |          |          |   |          |          |         |   |         |         |          |   |         |         |          |   |         |         |          |   |         |          |         |   |         |          |         |   |         |          |         |   |         |          |          |   |         |          |         |   |         |          |         |   |         |          |          |
| C                                              | -4.54913                                                                                                                                                                                                                                                                                                                                                                                                                                                                                                                                                                                                                                                                                                                                                                                                                                                                                                                                                                                                                                                                                                                                                                                                                                                                                                                                                                                                                                                                                                                                                                                                                                                                                                                                                                                                                                                                                                                                                     | -1.90814 | -2.52750 |         |         |   |         |         |          |   |          |         |         |   |         |         |          |   |         |         |          |   |          |         |          |   |          |          |          |   |          |          |          |   |          |          |          |   |          |          |         |   |         |          |          |   |          |          |         |   |          |         |         |   |          |          |          |   |         |          |          |   |          |          |         |   |         |         |          |   |         |         |          |   |         |         |          |   |         |          |         |   |         |          |         |   |         |          |         |   |         |          |          |   |         |          |         |   |         |          |         |   |         |          |          |
| H                                              | 4.01969                                                                                                                                                                                                                                                                                                                                                                                                                                                                                                                                                                                                                                                                                                                                                                                                                                                                                                                                                                                                                                                                                                                                                                                                                                                                                                                                                                                                                                                                                                                                                                                                                                                                                                                                                                                                                                                                                                                                                      | -2.25141 | -0.70656 |         |         |   |         |         |          |   |          |         |         |   |         |         |          |   |         |         |          |   |          |         |          |   |          |          |          |   |          |          |          |   |          |          |          |   |          |          |         |   |         |          |          |   |          |          |         |   |          |         |         |   |          |          |          |   |         |          |          |   |          |          |         |   |         |         |          |   |         |         |          |   |         |         |          |   |         |          |         |   |         |          |         |   |         |          |         |   |         |          |          |   |         |          |         |   |         |          |         |   |         |          |          |
| C                                              | -1.08383                                                                                                                                                                                                                                                                                                                                                                                                                                                                                                                                                                                                                                                                                                                                                                                                                                                                                                                                                                                                                                                                                                                                                                                                                                                                                                                                                                                                                                                                                                                                                                                                                                                                                                                                                                                                                                                                                                                                                     | -1.28829 | 1.14547  |         |         |   |         |         |          |   |          |         |         |   |         |         |          |   |         |         |          |   |          |         |          |   |          |          |          |   |          |          |          |   |          |          |          |   |          |          |         |   |         |          |          |   |          |          |         |   |          |         |         |   |          |          |          |   |         |          |          |   |          |          |         |   |         |         |          |   |         |         |          |   |         |         |          |   |         |          |         |   |         |          |         |   |         |          |         |   |         |          |          |   |         |          |         |   |         |          |         |   |         |          |          |
| C                                              | 0.52582                                                                                                                                                                                                                                                                                                                                                                                                                                                                                                                                                                                                                                                                                                                                                                                                                                                                                                                                                                                                                                                                                                                                                                                                                                                                                                                                                                                                                                                                                                                                                                                                                                                                                                                                                                                                                                                                                                                                                      | 0.19931  | -0.13786 |         |         |   |         |         |          |   |          |         |         |   |         |         |          |   |         |         |          |   |          |         |          |   |          |          |          |   |          |          |          |   |          |          |          |   |          |          |         |   |         |          |          |   |          |          |         |   |          |         |         |   |          |          |          |   |         |          |          |   |          |          |         |   |         |         |          |   |         |         |          |   |         |         |          |   |         |          |         |   |         |          |         |   |         |          |         |   |         |          |          |   |         |          |         |   |         |          |         |   |         |          |          |
| H                                              | 2.39391                                                                                                                                                                                                                                                                                                                                                                                                                                                                                                                                                                                                                                                                                                                                                                                                                                                                                                                                                                                                                                                                                                                                                                                                                                                                                                                                                                                                                                                                                                                                                                                                                                                                                                                                                                                                                                                                                                                                                      | 1.86513  | -1.77251 |         |         |   |         |         |          |   |          |         |         |   |         |         |          |   |         |         |          |   |          |         |          |   |          |          |          |   |          |          |          |   |          |          |          |   |          |          |         |   |         |          |          |   |          |          |         |   |          |         |         |   |          |          |          |   |         |          |          |   |          |          |         |   |         |         |          |   |         |         |          |   |         |         |          |   |         |          |         |   |         |          |         |   |         |          |         |   |         |          |          |   |         |          |         |   |         |          |         |   |         |          |          |
| O                                              | 1.57262                                                                                                                                                                                                                                                                                                                                                                                                                                                                                                                                                                                                                                                                                                                                                                                                                                                                                                                                                                                                                                                                                                                                                                                                                                                                                                                                                                                                                                                                                                                                                                                                                                                                                                                                                                                                                                                                                                                                                      | 0.55763  | -0.68369 |         |         |   |         |         |          |   |          |         |         |   |         |         |          |   |         |         |          |   |          |         |          |   |          |          |          |   |          |          |          |   |          |          |          |   |          |          |         |   |         |          |          |   |          |          |         |   |          |         |         |   |          |          |          |   |         |          |          |   |          |          |         |   |         |         |          |   |         |         |          |   |         |         |          |   |         |          |         |   |         |          |         |   |         |          |         |   |         |          |          |   |         |          |         |   |         |          |         |   |         |          |          |
| C                                              | 0.25054                                                                                                                                                                                                                                                                                                                                                                                                                                                                                                                                                                                                                                                                                                                                                                                                                                                                                                                                                                                                                                                                                                                                                                                                                                                                                                                                                                                                                                                                                                                                                                                                                                                                                                                                                                                                                                                                                                                                                      | -1.13865 | 0.38179  |         |         |   |         |         |          |   |          |         |         |   |         |         |          |   |         |         |          |   |          |         |          |   |          |          |          |   |          |          |          |   |          |          |          |   |          |          |         |   |         |          |          |   |          |          |         |   |          |         |         |   |          |          |          |   |         |          |          |   |          |          |         |   |         |         |          |   |         |         |          |   |         |         |          |   |         |          |         |   |         |          |         |   |         |          |         |   |         |          |          |   |         |          |         |   |         |          |         |   |         |          |          |
| C                                              | 1.50893                                                                                                                                                                                                                                                                                                                                                                                                                                                                                                                                                                                                                                                                                                                                                                                                                                                                                                                                                                                                                                                                                                                                                                                                                                                                                                                                                                                                                                                                                                                                                                                                                                                                                                                                                                                                                                                                                                                                                      | -1.81582 | 1.01458  |         |         |   |         |         |          |   |          |         |         |   |         |         |          |   |         |         |          |   |          |         |          |   |          |          |          |   |          |          |          |   |          |          |          |   |          |          |         |   |         |          |          |   |          |          |         |   |          |         |         |   |          |          |          |   |         |          |          |   |          |          |         |   |         |         |          |   |         |         |          |   |         |         |          |   |         |          |         |   |         |          |         |   |         |          |         |   |         |          |          |   |         |          |         |   |         |          |         |   |         |          |          |
| C                                              | 2.31924                                                                                                                                                                                                                                                                                                                                                                                                                                                                                                                                                                                                                                                                                                                                                                                                                                                                                                                                                                                                                                                                                                                                                                                                                                                                                                                                                                                                                                                                                                                                                                                                                                                                                                                                                                                                                                                                                                                                                      | -0.91682 | 1.94514  |         |         |   |         |         |          |   |          |         |         |   |         |         |          |   |         |         |          |   |          |         |          |   |          |          |          |   |          |          |          |   |          |          |          |   |          |          |         |   |         |          |          |   |          |          |         |   |          |         |         |   |          |          |          |   |         |          |          |   |          |          |         |   |         |         |          |   |         |         |          |   |         |         |          |   |         |          |         |   |         |          |         |   |         |          |         |   |         |          |          |   |         |          |         |   |         |          |         |   |         |          |          |
| C                                              | 4.55415                                                                                                                                                                                                                                                                                                                                                                                                                                                                                                                                                                                                                                                                                                                                                                                                                                                                                                                                                                                                                                                                                                                                                                                                                                                                                                                                                                                                                                                                                                                                                                                                                                                                                                                                                                                                                                                                                                                                                      | -1.21943 | -2.25701 |         |         |   |         |         |          |   |          |         |         |   |         |         |          |   |         |         |          |   |          |         |          |   |          |          |          |   |          |          |          |   |          |          |          |   |          |          |         |   |         |          |          |   |          |          |         |   |          |         |         |   |          |          |          |   |         |          |          |   |          |          |         |   |         |         |          |   |         |         |          |   |         |         |          |   |         |          |         |   |         |          |         |   |         |          |         |   |         |          |          |   |         |          |         |   |         |          |         |   |         |          |          |
| O                                              | 2.36171                                                                                                                                                                                                                                                                                                                                                                                                                                                                                                                                                                                                                                                                                                                                                                                                                                                                                                                                                                                                                                                                                                                                                                                                                                                                                                                                                                                                                                                                                                                                                                                                                                                                                                                                                                                                                                                                                                                                                      | -2.39439 | 0.02706  |         |         |   |         |         |          |   |          |         |         |   |         |         |          |   |         |         |          |   |          |         |          |   |          |          |          |   |          |          |          |   |          |          |          |   |          |          |         |   |         |          |          |   |          |          |         |   |          |         |         |   |          |          |          |   |         |          |          |   |          |          |         |   |         |         |          |   |         |         |          |   |         |         |          |   |         |          |         |   |         |          |         |   |         |          |         |   |         |          |          |   |         |          |         |   |         |          |         |   |         |          |          |
| C                                              | 3.63259                                                                                                                                                                                                                                                                                                                                                                                                                                                                                                                                                                                                                                                                                                                                                                                                                                                                                                                                                                                                                                                                                                                                                                                                                                                                                                                                                                                                                                                                                                                                                                                                                                                                                                                                                                                                                                                                                                                                                      | -0.52179 | 1.66462  |         |         |   |         |         |          |   |          |         |         |   |         |         |          |   |         |         |          |   |          |         |          |   |          |          |          |   |          |          |          |   |          |          |          |   |          |          |         |   |         |          |          |   |          |          |         |   |          |         |         |   |          |          |          |   |         |          |          |   |          |          |         |   |         |         |          |   |         |         |          |   |         |         |          |   |         |          |         |   |         |          |         |   |         |          |         |   |         |          |          |   |         |          |         |   |         |          |         |   |         |          |          |
| H                                              | 3.99369                                                                                                                                                                                                                                                                                                                                                                                                                                                                                                                                                                                                                                                                                                                                                                                                                                                                                                                                                                                                                                                                                                                                                                                                                                                                                                                                                                                                                                                                                                                                                                                                                                                                                                                                                                                                                                                                                                                                                      | -1.74238 | -3.05118 |         |         |   |         |         |          |   |          |         |         |   |         |         |          |   |         |         |          |   |          |         |          |   |          |          |          |   |          |          |          |   |          |          |          |   |          |          |         |   |         |          |          |   |          |          |         |   |          |         |         |   |          |          |          |   |         |          |          |   |          |          |         |   |         |         |          |   |         |         |          |   |         |         |          |   |         |          |         |   |         |          |         |   |         |          |         |   |         |          |          |   |         |          |         |   |         |          |         |   |         |          |          |

|   |          |          |          |
|---|----------|----------|----------|
| C | 1.73706  | -0.47734 | 3.14463  |
| H | 5.50006  | -0.87163 | -2.68958 |
| C | 4.33482  | 0.29372  | 2.55661  |
| C | 4.01499  | 3.30353  | -0.31030 |
| C | 2.43482  | 0.33950  | 4.03343  |
| H | 3.47084  | 2.46908  | 0.13931  |
| C | 3.74304  | 0.73162  | 3.74163  |
| H | 3.72083  | 4.23749  | 0.18161  |
| H | 0.15852  | -1.96113 | -0.72158 |
| H | 5.08727  | 3.16990  | -0.13580 |
| O | -0.52533 | 1.06920  | -0.01342 |
| C | -0.36390 | 2.35303  | -0.61263 |
| C | -1.26199 | -2.62695 | 1.88763  |
| H | 1.95730  | 0.66588  | 4.95499  |
| H | 4.29361  | 1.36731  | 4.43159  |
| H | 5.35494  | 0.58634  | 2.31775  |
| H | 4.11467  | -0.86256 | 0.75674  |
| H | 0.72096  | -0.77812 | 3.39064  |
| H | -0.60038 | -2.70210 | 2.75563  |
| H | -1.05842 | -3.47527 | 1.22544  |
| H | -2.29395 | -2.70748 | 2.24559  |
| H | 1.13501  | -2.63651 | 1.64041  |
| H | -1.22058 | -0.47714 | 1.87244  |
| H | -1.83645 | -2.61431 | -1.26646 |
| H | -5.53376 | -2.29861 | -2.23843 |
| H | -4.72414 | -1.08621 | -3.23372 |
| H | -4.01298 | -2.70082 | -3.05914 |
| H | -3.35100 | 0.42225  | 1.23637  |
| H | -8.47676 | 2.19070  | 0.80437  |
| H | -1.29823 | 2.88478  | -0.42176 |
| H | 0.47753  | 2.89529  | -0.17062 |
| H | -7.49209 | 3.42378  | 1.65027  |
| H | -0.19550 | 2.26863  | -1.69099 |
| H | -7.62961 | 3.41983  | -0.13386 |
| O | 0.31095  | -2.89816 | -1.54907 |
| H | 1.74725  | -2.77945 | -0.66202 |
| C | 0.47717  | -2.36190 | -2.83407 |
| H | -0.45787 | -1.91999 | -3.22977 |
| H | 0.78275  | -3.14974 | -3.54387 |
| H | 1.24736  | -1.57122 | -2.87105 |
| H | -5.56105 | 0.49113  | -0.43432 |
| H | 2.70933  | 2.61636  | -3.32477 |
| H | 3.96775  | -0.34183 | -1.95324 |

Optimized Molecular Properties for **T9-INT3**

|                                                |                                                                                                                                                                                                                                                                                                                                                                                                                                                                                                                                                                                                                                                                                                                                                                                                                                                                                                                                                                                                                                                                                                                                                                                                                                                                                                                                                                                                                                                                                                                                                                                                                                                                                                                                                                                                                                                                                                                                                                                                                                               |          |          |         |          |   |          |         |         |   |         |         |          |   |          |         |          |   |          |         |          |   |         |         |         |   |         |          |         |   |         |          |         |   |         |          |         |   |         |          |          |   |          |          |         |   |         |          |          |   |         |         |          |   |         |          |         |   |          |          |         |   |         |          |          |   |          |         |          |   |          |         |          |   |          |         |         |   |          |          |          |   |          |          |          |   |          |          |          |   |          |          |         |   |          |          |         |   |          |          |          |   |          |          |         |   |          |          |          |
|------------------------------------------------|-----------------------------------------------------------------------------------------------------------------------------------------------------------------------------------------------------------------------------------------------------------------------------------------------------------------------------------------------------------------------------------------------------------------------------------------------------------------------------------------------------------------------------------------------------------------------------------------------------------------------------------------------------------------------------------------------------------------------------------------------------------------------------------------------------------------------------------------------------------------------------------------------------------------------------------------------------------------------------------------------------------------------------------------------------------------------------------------------------------------------------------------------------------------------------------------------------------------------------------------------------------------------------------------------------------------------------------------------------------------------------------------------------------------------------------------------------------------------------------------------------------------------------------------------------------------------------------------------------------------------------------------------------------------------------------------------------------------------------------------------------------------------------------------------------------------------------------------------------------------------------------------------------------------------------------------------------------------------------------------------------------------------------------------------|----------|----------|---------|----------|---|----------|---------|---------|---|---------|---------|----------|---|----------|---------|----------|---|----------|---------|----------|---|---------|---------|---------|---|---------|----------|---------|---|---------|----------|---------|---|---------|----------|---------|---|---------|----------|----------|---|----------|----------|---------|---|---------|----------|----------|---|---------|---------|----------|---|---------|----------|---------|---|----------|----------|---------|---|---------|----------|----------|---|----------|---------|----------|---|----------|---------|----------|---|----------|---------|---------|---|----------|----------|----------|---|----------|----------|----------|---|----------|----------|----------|---|----------|----------|---------|---|----------|----------|---------|---|----------|----------|----------|---|----------|----------|---------|---|----------|----------|----------|
| Number of<br>(-)<br>Vibrational<br>Frequencies | 0                                                                                                                                                                                                                                                                                                                                                                                                                                                                                                                                                                                                                                                                                                                                                                                                                                                                                                                                                                                                                                                                                                                                                                                                                                                                                                                                                                                                                                                                                                                                                                                                                                                                                                                                                                                                                                                                                                                                                                                                                                             |          |          |         |          |   |          |         |         |   |         |         |          |   |          |         |          |   |          |         |          |   |         |         |         |   |         |          |         |   |         |          |         |   |         |          |         |   |         |          |          |   |          |          |         |   |         |          |          |   |         |         |          |   |         |          |         |   |          |          |         |   |         |          |          |   |          |         |          |   |          |         |          |   |          |         |         |   |          |          |          |   |          |          |          |   |          |          |          |   |          |          |         |   |          |          |         |   |          |          |          |   |          |          |         |   |          |          |          |
| Absolute<br>Energies<br>(Hartrees)             | <p><b>B3LYP/6-31G(d)</b></p> <p>There are 21 positive frequencies below 100 cm<sup>-1</sup>.</p> <p>Zero-point correction: 0.574644 hartree<br/>         Enthalpy correction: 0.617771 hartree<br/>         Free Energy correction: 0.489983 hartree<br/>         Quasiharmonic Free Energy correction: 0.505837 hartree</p> <p>SCF Energy: -1626.154329 hartree<br/>         SCF Energy + ZPVE: -1625.579685 hartree<br/>         Enthalpy: -1625.536558 hartree<br/>         Free Energy: -1625.664346 hartree</p> <p>Free Energy with quasiharmonic correction: -1625.648492 hartree<br/>         (correction: 9.95 kcal/mol)</p> <p><b>B3LYP-D3/6-311+G(d,p)</b></p> <p>SCF Done: E(RB3LYP) = -1626.76120734 A.U.</p>                                                                                                                                                                                                                                                                                                                                                                                                                                                                                                                                                                                                                                                                                                                                                                                                                                                                                                                                                                                                                                                                                                                                                                                                                                                                                                                     |          |          |         |          |   |          |         |         |   |         |         |          |   |          |         |          |   |          |         |          |   |         |         |         |   |         |          |         |   |         |          |         |   |         |          |         |   |         |          |          |   |          |          |         |   |         |          |          |   |         |         |          |   |         |          |         |   |          |          |         |   |         |          |          |   |          |         |          |   |          |         |          |   |          |         |         |   |          |          |          |   |          |          |          |   |          |          |          |   |          |          |         |   |          |          |         |   |          |          |          |   |          |          |         |   |          |          |          |
| Cartesian<br>Coordinates                       | <p>69<br/>         spD3-INT3-T9.out Energy: -1020808.0614077</p> <table> <tr><td>C</td><td>7.23900</td><td>1.08920</td><td>-0.59854</td></tr> <tr><td>C</td><td>-5.23620</td><td>2.45325</td><td>0.11124</td></tr> <tr><td>O</td><td>6.39403</td><td>1.54472</td><td>-1.35442</td></tr> <tr><td>O</td><td>-6.42722</td><td>2.64569</td><td>-0.13630</td></tr> <tr><td>N</td><td>-4.53685</td><td>1.38154</td><td>-0.32794</td></tr> <tr><td>O</td><td>7.02457</td><td>0.16047</td><td>0.32327</td></tr> <tr><td>C</td><td>3.70609</td><td>-1.55760</td><td>0.93087</td></tr> <tr><td>C</td><td>2.41944</td><td>-1.50436</td><td>0.44927</td></tr> <tr><td>N</td><td>4.46805</td><td>-0.60688</td><td>0.28028</td></tr> <tr><td>C</td><td>3.64861</td><td>-0.00040</td><td>-0.56863</td></tr> <tr><td>O</td><td>-2.94231</td><td>-2.09204</td><td>2.80277</td></tr> <tr><td>N</td><td>2.39409</td><td>-0.50237</td><td>-0.50104</td></tr> <tr><td>C</td><td>8.69017</td><td>1.54171</td><td>-0.61628</td></tr> <tr><td>C</td><td>4.27758</td><td>-2.44668</td><td>1.99064</td></tr> <tr><td>H</td><td>-2.33339</td><td>-2.05760</td><td>2.03396</td></tr> <tr><td>C</td><td>1.23962</td><td>-0.10694</td><td>-1.39933</td></tr> <tr><td>C</td><td>-0.63004</td><td>1.02968</td><td>-0.15963</td></tr> <tr><td>H</td><td>-3.54073</td><td>1.24406</td><td>-0.13526</td></tr> <tr><td>O</td><td>-1.75046</td><td>1.20495</td><td>0.38309</td></tr> <tr><td>C</td><td>-0.11237</td><td>-0.12994</td><td>-0.74216</td></tr> <tr><td>C</td><td>-0.88100</td><td>-1.41517</td><td>-0.59419</td></tr> <tr><td>C</td><td>-2.28381</td><td>-1.46465</td><td>-1.21473</td></tr> <tr><td>C</td><td>-3.99118</td><td>-1.17176</td><td>2.55358</td></tr> <tr><td>O</td><td>-0.94689</td><td>-1.90214</td><td>0.78236</td></tr> <tr><td>C</td><td>-3.25880</td><td>-2.35095</td><td>-0.73466</td></tr> <tr><td>H</td><td>-3.62348</td><td>-0.19185</td><td>2.22185</td></tr> <tr><td>C</td><td>-2.58048</td><td>-0.71777</td><td>-2.36210</td></tr> </table> | C        | 7.23900  | 1.08920 | -0.59854 | C | -5.23620 | 2.45325 | 0.11124 | O | 6.39403 | 1.54472 | -1.35442 | O | -6.42722 | 2.64569 | -0.13630 | N | -4.53685 | 1.38154 | -0.32794 | O | 7.02457 | 0.16047 | 0.32327 | C | 3.70609 | -1.55760 | 0.93087 | C | 2.41944 | -1.50436 | 0.44927 | N | 4.46805 | -0.60688 | 0.28028 | C | 3.64861 | -0.00040 | -0.56863 | O | -2.94231 | -2.09204 | 2.80277 | N | 2.39409 | -0.50237 | -0.50104 | C | 8.69017 | 1.54171 | -0.61628 | C | 4.27758 | -2.44668 | 1.99064 | H | -2.33339 | -2.05760 | 2.03396 | C | 1.23962 | -0.10694 | -1.39933 | C | -0.63004 | 1.02968 | -0.15963 | H | -3.54073 | 1.24406 | -0.13526 | O | -1.75046 | 1.20495 | 0.38309 | C | -0.11237 | -0.12994 | -0.74216 | C | -0.88100 | -1.41517 | -0.59419 | C | -2.28381 | -1.46465 | -1.21473 | C | -3.99118 | -1.17176 | 2.55358 | O | -0.94689 | -1.90214 | 0.78236 | C | -3.25880 | -2.35095 | -0.73466 | H | -3.62348 | -0.19185 | 2.22185 | C | -2.58048 | -0.71777 | -2.36210 |
| C                                              | 7.23900                                                                                                                                                                                                                                                                                                                                                                                                                                                                                                                                                                                                                                                                                                                                                                                                                                                                                                                                                                                                                                                                                                                                                                                                                                                                                                                                                                                                                                                                                                                                                                                                                                                                                                                                                                                                                                                                                                                                                                                                                                       | 1.08920  | -0.59854 |         |          |   |          |         |         |   |         |         |          |   |          |         |          |   |          |         |          |   |         |         |         |   |         |          |         |   |         |          |         |   |         |          |         |   |         |          |          |   |          |          |         |   |         |          |          |   |         |         |          |   |         |          |         |   |          |          |         |   |         |          |          |   |          |         |          |   |          |         |          |   |          |         |         |   |          |          |          |   |          |          |          |   |          |          |          |   |          |          |         |   |          |          |         |   |          |          |          |   |          |          |         |   |          |          |          |
| C                                              | -5.23620                                                                                                                                                                                                                                                                                                                                                                                                                                                                                                                                                                                                                                                                                                                                                                                                                                                                                                                                                                                                                                                                                                                                                                                                                                                                                                                                                                                                                                                                                                                                                                                                                                                                                                                                                                                                                                                                                                                                                                                                                                      | 2.45325  | 0.11124  |         |          |   |          |         |         |   |         |         |          |   |          |         |          |   |          |         |          |   |         |         |         |   |         |          |         |   |         |          |         |   |         |          |         |   |         |          |          |   |          |          |         |   |         |          |          |   |         |         |          |   |         |          |         |   |          |          |         |   |         |          |          |   |          |         |          |   |          |         |          |   |          |         |         |   |          |          |          |   |          |          |          |   |          |          |          |   |          |          |         |   |          |          |         |   |          |          |          |   |          |          |         |   |          |          |          |
| O                                              | 6.39403                                                                                                                                                                                                                                                                                                                                                                                                                                                                                                                                                                                                                                                                                                                                                                                                                                                                                                                                                                                                                                                                                                                                                                                                                                                                                                                                                                                                                                                                                                                                                                                                                                                                                                                                                                                                                                                                                                                                                                                                                                       | 1.54472  | -1.35442 |         |          |   |          |         |         |   |         |         |          |   |          |         |          |   |          |         |          |   |         |         |         |   |         |          |         |   |         |          |         |   |         |          |         |   |         |          |          |   |          |          |         |   |         |          |          |   |         |         |          |   |         |          |         |   |          |          |         |   |         |          |          |   |          |         |          |   |          |         |          |   |          |         |         |   |          |          |          |   |          |          |          |   |          |          |          |   |          |          |         |   |          |          |         |   |          |          |          |   |          |          |         |   |          |          |          |
| O                                              | -6.42722                                                                                                                                                                                                                                                                                                                                                                                                                                                                                                                                                                                                                                                                                                                                                                                                                                                                                                                                                                                                                                                                                                                                                                                                                                                                                                                                                                                                                                                                                                                                                                                                                                                                                                                                                                                                                                                                                                                                                                                                                                      | 2.64569  | -0.13630 |         |          |   |          |         |         |   |         |         |          |   |          |         |          |   |          |         |          |   |         |         |         |   |         |          |         |   |         |          |         |   |         |          |         |   |         |          |          |   |          |          |         |   |         |          |          |   |         |         |          |   |         |          |         |   |          |          |         |   |         |          |          |   |          |         |          |   |          |         |          |   |          |         |         |   |          |          |          |   |          |          |          |   |          |          |          |   |          |          |         |   |          |          |         |   |          |          |          |   |          |          |         |   |          |          |          |
| N                                              | -4.53685                                                                                                                                                                                                                                                                                                                                                                                                                                                                                                                                                                                                                                                                                                                                                                                                                                                                                                                                                                                                                                                                                                                                                                                                                                                                                                                                                                                                                                                                                                                                                                                                                                                                                                                                                                                                                                                                                                                                                                                                                                      | 1.38154  | -0.32794 |         |          |   |          |         |         |   |         |         |          |   |          |         |          |   |          |         |          |   |         |         |         |   |         |          |         |   |         |          |         |   |         |          |         |   |         |          |          |   |          |          |         |   |         |          |          |   |         |         |          |   |         |          |         |   |          |          |         |   |         |          |          |   |          |         |          |   |          |         |          |   |          |         |         |   |          |          |          |   |          |          |          |   |          |          |          |   |          |          |         |   |          |          |         |   |          |          |          |   |          |          |         |   |          |          |          |
| O                                              | 7.02457                                                                                                                                                                                                                                                                                                                                                                                                                                                                                                                                                                                                                                                                                                                                                                                                                                                                                                                                                                                                                                                                                                                                                                                                                                                                                                                                                                                                                                                                                                                                                                                                                                                                                                                                                                                                                                                                                                                                                                                                                                       | 0.16047  | 0.32327  |         |          |   |          |         |         |   |         |         |          |   |          |         |          |   |          |         |          |   |         |         |         |   |         |          |         |   |         |          |         |   |         |          |         |   |         |          |          |   |          |          |         |   |         |          |          |   |         |         |          |   |         |          |         |   |          |          |         |   |         |          |          |   |          |         |          |   |          |         |          |   |          |         |         |   |          |          |          |   |          |          |          |   |          |          |          |   |          |          |         |   |          |          |         |   |          |          |          |   |          |          |         |   |          |          |          |
| C                                              | 3.70609                                                                                                                                                                                                                                                                                                                                                                                                                                                                                                                                                                                                                                                                                                                                                                                                                                                                                                                                                                                                                                                                                                                                                                                                                                                                                                                                                                                                                                                                                                                                                                                                                                                                                                                                                                                                                                                                                                                                                                                                                                       | -1.55760 | 0.93087  |         |          |   |          |         |         |   |         |         |          |   |          |         |          |   |          |         |          |   |         |         |         |   |         |          |         |   |         |          |         |   |         |          |         |   |         |          |          |   |          |          |         |   |         |          |          |   |         |         |          |   |         |          |         |   |          |          |         |   |         |          |          |   |          |         |          |   |          |         |          |   |          |         |         |   |          |          |          |   |          |          |          |   |          |          |          |   |          |          |         |   |          |          |         |   |          |          |          |   |          |          |         |   |          |          |          |
| C                                              | 2.41944                                                                                                                                                                                                                                                                                                                                                                                                                                                                                                                                                                                                                                                                                                                                                                                                                                                                                                                                                                                                                                                                                                                                                                                                                                                                                                                                                                                                                                                                                                                                                                                                                                                                                                                                                                                                                                                                                                                                                                                                                                       | -1.50436 | 0.44927  |         |          |   |          |         |         |   |         |         |          |   |          |         |          |   |          |         |          |   |         |         |         |   |         |          |         |   |         |          |         |   |         |          |         |   |         |          |          |   |          |          |         |   |         |          |          |   |         |         |          |   |         |          |         |   |          |          |         |   |         |          |          |   |          |         |          |   |          |         |          |   |          |         |         |   |          |          |          |   |          |          |          |   |          |          |          |   |          |          |         |   |          |          |         |   |          |          |          |   |          |          |         |   |          |          |          |
| N                                              | 4.46805                                                                                                                                                                                                                                                                                                                                                                                                                                                                                                                                                                                                                                                                                                                                                                                                                                                                                                                                                                                                                                                                                                                                                                                                                                                                                                                                                                                                                                                                                                                                                                                                                                                                                                                                                                                                                                                                                                                                                                                                                                       | -0.60688 | 0.28028  |         |          |   |          |         |         |   |         |         |          |   |          |         |          |   |          |         |          |   |         |         |         |   |         |          |         |   |         |          |         |   |         |          |         |   |         |          |          |   |          |          |         |   |         |          |          |   |         |         |          |   |         |          |         |   |          |          |         |   |         |          |          |   |          |         |          |   |          |         |          |   |          |         |         |   |          |          |          |   |          |          |          |   |          |          |          |   |          |          |         |   |          |          |         |   |          |          |          |   |          |          |         |   |          |          |          |
| C                                              | 3.64861                                                                                                                                                                                                                                                                                                                                                                                                                                                                                                                                                                                                                                                                                                                                                                                                                                                                                                                                                                                                                                                                                                                                                                                                                                                                                                                                                                                                                                                                                                                                                                                                                                                                                                                                                                                                                                                                                                                                                                                                                                       | -0.00040 | -0.56863 |         |          |   |          |         |         |   |         |         |          |   |          |         |          |   |          |         |          |   |         |         |         |   |         |          |         |   |         |          |         |   |         |          |         |   |         |          |          |   |          |          |         |   |         |          |          |   |         |         |          |   |         |          |         |   |          |          |         |   |         |          |          |   |          |         |          |   |          |         |          |   |          |         |         |   |          |          |          |   |          |          |          |   |          |          |          |   |          |          |         |   |          |          |         |   |          |          |          |   |          |          |         |   |          |          |          |
| O                                              | -2.94231                                                                                                                                                                                                                                                                                                                                                                                                                                                                                                                                                                                                                                                                                                                                                                                                                                                                                                                                                                                                                                                                                                                                                                                                                                                                                                                                                                                                                                                                                                                                                                                                                                                                                                                                                                                                                                                                                                                                                                                                                                      | -2.09204 | 2.80277  |         |          |   |          |         |         |   |         |         |          |   |          |         |          |   |          |         |          |   |         |         |         |   |         |          |         |   |         |          |         |   |         |          |         |   |         |          |          |   |          |          |         |   |         |          |          |   |         |         |          |   |         |          |         |   |          |          |         |   |         |          |          |   |          |         |          |   |          |         |          |   |          |         |         |   |          |          |          |   |          |          |          |   |          |          |          |   |          |          |         |   |          |          |         |   |          |          |          |   |          |          |         |   |          |          |          |
| N                                              | 2.39409                                                                                                                                                                                                                                                                                                                                                                                                                                                                                                                                                                                                                                                                                                                                                                                                                                                                                                                                                                                                                                                                                                                                                                                                                                                                                                                                                                                                                                                                                                                                                                                                                                                                                                                                                                                                                                                                                                                                                                                                                                       | -0.50237 | -0.50104 |         |          |   |          |         |         |   |         |         |          |   |          |         |          |   |          |         |          |   |         |         |         |   |         |          |         |   |         |          |         |   |         |          |         |   |         |          |          |   |          |          |         |   |         |          |          |   |         |         |          |   |         |          |         |   |          |          |         |   |         |          |          |   |          |         |          |   |          |         |          |   |          |         |         |   |          |          |          |   |          |          |          |   |          |          |          |   |          |          |         |   |          |          |         |   |          |          |          |   |          |          |         |   |          |          |          |
| C                                              | 8.69017                                                                                                                                                                                                                                                                                                                                                                                                                                                                                                                                                                                                                                                                                                                                                                                                                                                                                                                                                                                                                                                                                                                                                                                                                                                                                                                                                                                                                                                                                                                                                                                                                                                                                                                                                                                                                                                                                                                                                                                                                                       | 1.54171  | -0.61628 |         |          |   |          |         |         |   |         |         |          |   |          |         |          |   |          |         |          |   |         |         |         |   |         |          |         |   |         |          |         |   |         |          |         |   |         |          |          |   |          |          |         |   |         |          |          |   |         |         |          |   |         |          |         |   |          |          |         |   |         |          |          |   |          |         |          |   |          |         |          |   |          |         |         |   |          |          |          |   |          |          |          |   |          |          |          |   |          |          |         |   |          |          |         |   |          |          |          |   |          |          |         |   |          |          |          |
| C                                              | 4.27758                                                                                                                                                                                                                                                                                                                                                                                                                                                                                                                                                                                                                                                                                                                                                                                                                                                                                                                                                                                                                                                                                                                                                                                                                                                                                                                                                                                                                                                                                                                                                                                                                                                                                                                                                                                                                                                                                                                                                                                                                                       | -2.44668 | 1.99064  |         |          |   |          |         |         |   |         |         |          |   |          |         |          |   |          |         |          |   |         |         |         |   |         |          |         |   |         |          |         |   |         |          |         |   |         |          |          |   |          |          |         |   |         |          |          |   |         |         |          |   |         |          |         |   |          |          |         |   |         |          |          |   |          |         |          |   |          |         |          |   |          |         |         |   |          |          |          |   |          |          |          |   |          |          |          |   |          |          |         |   |          |          |         |   |          |          |          |   |          |          |         |   |          |          |          |
| H                                              | -2.33339                                                                                                                                                                                                                                                                                                                                                                                                                                                                                                                                                                                                                                                                                                                                                                                                                                                                                                                                                                                                                                                                                                                                                                                                                                                                                                                                                                                                                                                                                                                                                                                                                                                                                                                                                                                                                                                                                                                                                                                                                                      | -2.05760 | 2.03396  |         |          |   |          |         |         |   |         |         |          |   |          |         |          |   |          |         |          |   |         |         |         |   |         |          |         |   |         |          |         |   |         |          |         |   |         |          |          |   |          |          |         |   |         |          |          |   |         |         |          |   |         |          |         |   |          |          |         |   |         |          |          |   |          |         |          |   |          |         |          |   |          |         |         |   |          |          |          |   |          |          |          |   |          |          |          |   |          |          |         |   |          |          |         |   |          |          |          |   |          |          |         |   |          |          |          |
| C                                              | 1.23962                                                                                                                                                                                                                                                                                                                                                                                                                                                                                                                                                                                                                                                                                                                                                                                                                                                                                                                                                                                                                                                                                                                                                                                                                                                                                                                                                                                                                                                                                                                                                                                                                                                                                                                                                                                                                                                                                                                                                                                                                                       | -0.10694 | -1.39933 |         |          |   |          |         |         |   |         |         |          |   |          |         |          |   |          |         |          |   |         |         |         |   |         |          |         |   |         |          |         |   |         |          |         |   |         |          |          |   |          |          |         |   |         |          |          |   |         |         |          |   |         |          |         |   |          |          |         |   |         |          |          |   |          |         |          |   |          |         |          |   |          |         |         |   |          |          |          |   |          |          |          |   |          |          |          |   |          |          |         |   |          |          |         |   |          |          |          |   |          |          |         |   |          |          |          |
| C                                              | -0.63004                                                                                                                                                                                                                                                                                                                                                                                                                                                                                                                                                                                                                                                                                                                                                                                                                                                                                                                                                                                                                                                                                                                                                                                                                                                                                                                                                                                                                                                                                                                                                                                                                                                                                                                                                                                                                                                                                                                                                                                                                                      | 1.02968  | -0.15963 |         |          |   |          |         |         |   |         |         |          |   |          |         |          |   |          |         |          |   |         |         |         |   |         |          |         |   |         |          |         |   |         |          |         |   |         |          |          |   |          |          |         |   |         |          |          |   |         |         |          |   |         |          |         |   |          |          |         |   |         |          |          |   |          |         |          |   |          |         |          |   |          |         |         |   |          |          |          |   |          |          |          |   |          |          |          |   |          |          |         |   |          |          |         |   |          |          |          |   |          |          |         |   |          |          |          |
| H                                              | -3.54073                                                                                                                                                                                                                                                                                                                                                                                                                                                                                                                                                                                                                                                                                                                                                                                                                                                                                                                                                                                                                                                                                                                                                                                                                                                                                                                                                                                                                                                                                                                                                                                                                                                                                                                                                                                                                                                                                                                                                                                                                                      | 1.24406  | -0.13526 |         |          |   |          |         |         |   |         |         |          |   |          |         |          |   |          |         |          |   |         |         |         |   |         |          |         |   |         |          |         |   |         |          |         |   |         |          |          |   |          |          |         |   |         |          |          |   |         |         |          |   |         |          |         |   |          |          |         |   |         |          |          |   |          |         |          |   |          |         |          |   |          |         |         |   |          |          |          |   |          |          |          |   |          |          |          |   |          |          |         |   |          |          |         |   |          |          |          |   |          |          |         |   |          |          |          |
| O                                              | -1.75046                                                                                                                                                                                                                                                                                                                                                                                                                                                                                                                                                                                                                                                                                                                                                                                                                                                                                                                                                                                                                                                                                                                                                                                                                                                                                                                                                                                                                                                                                                                                                                                                                                                                                                                                                                                                                                                                                                                                                                                                                                      | 1.20495  | 0.38309  |         |          |   |          |         |         |   |         |         |          |   |          |         |          |   |          |         |          |   |         |         |         |   |         |          |         |   |         |          |         |   |         |          |         |   |         |          |          |   |          |          |         |   |         |          |          |   |         |         |          |   |         |          |         |   |          |          |         |   |         |          |          |   |          |         |          |   |          |         |          |   |          |         |         |   |          |          |          |   |          |          |          |   |          |          |          |   |          |          |         |   |          |          |         |   |          |          |          |   |          |          |         |   |          |          |          |
| C                                              | -0.11237                                                                                                                                                                                                                                                                                                                                                                                                                                                                                                                                                                                                                                                                                                                                                                                                                                                                                                                                                                                                                                                                                                                                                                                                                                                                                                                                                                                                                                                                                                                                                                                                                                                                                                                                                                                                                                                                                                                                                                                                                                      | -0.12994 | -0.74216 |         |          |   |          |         |         |   |         |         |          |   |          |         |          |   |          |         |          |   |         |         |         |   |         |          |         |   |         |          |         |   |         |          |         |   |         |          |          |   |          |          |         |   |         |          |          |   |         |         |          |   |         |          |         |   |          |          |         |   |         |          |          |   |          |         |          |   |          |         |          |   |          |         |         |   |          |          |          |   |          |          |          |   |          |          |          |   |          |          |         |   |          |          |         |   |          |          |          |   |          |          |         |   |          |          |          |
| C                                              | -0.88100                                                                                                                                                                                                                                                                                                                                                                                                                                                                                                                                                                                                                                                                                                                                                                                                                                                                                                                                                                                                                                                                                                                                                                                                                                                                                                                                                                                                                                                                                                                                                                                                                                                                                                                                                                                                                                                                                                                                                                                                                                      | -1.41517 | -0.59419 |         |          |   |          |         |         |   |         |         |          |   |          |         |          |   |          |         |          |   |         |         |         |   |         |          |         |   |         |          |         |   |         |          |         |   |         |          |          |   |          |          |         |   |         |          |          |   |         |         |          |   |         |          |         |   |          |          |         |   |         |          |          |   |          |         |          |   |          |         |          |   |          |         |         |   |          |          |          |   |          |          |          |   |          |          |          |   |          |          |         |   |          |          |         |   |          |          |          |   |          |          |         |   |          |          |          |
| C                                              | -2.28381                                                                                                                                                                                                                                                                                                                                                                                                                                                                                                                                                                                                                                                                                                                                                                                                                                                                                                                                                                                                                                                                                                                                                                                                                                                                                                                                                                                                                                                                                                                                                                                                                                                                                                                                                                                                                                                                                                                                                                                                                                      | -1.46465 | -1.21473 |         |          |   |          |         |         |   |         |         |          |   |          |         |          |   |          |         |          |   |         |         |         |   |         |          |         |   |         |          |         |   |         |          |         |   |         |          |          |   |          |          |         |   |         |          |          |   |         |         |          |   |         |          |         |   |          |          |         |   |         |          |          |   |          |         |          |   |          |         |          |   |          |         |         |   |          |          |          |   |          |          |          |   |          |          |          |   |          |          |         |   |          |          |         |   |          |          |          |   |          |          |         |   |          |          |          |
| C                                              | -3.99118                                                                                                                                                                                                                                                                                                                                                                                                                                                                                                                                                                                                                                                                                                                                                                                                                                                                                                                                                                                                                                                                                                                                                                                                                                                                                                                                                                                                                                                                                                                                                                                                                                                                                                                                                                                                                                                                                                                                                                                                                                      | -1.17176 | 2.55358  |         |          |   |          |         |         |   |         |         |          |   |          |         |          |   |          |         |          |   |         |         |         |   |         |          |         |   |         |          |         |   |         |          |         |   |         |          |          |   |          |          |         |   |         |          |          |   |         |         |          |   |         |          |         |   |          |          |         |   |         |          |          |   |          |         |          |   |          |         |          |   |          |         |         |   |          |          |          |   |          |          |          |   |          |          |          |   |          |          |         |   |          |          |         |   |          |          |          |   |          |          |         |   |          |          |          |
| O                                              | -0.94689                                                                                                                                                                                                                                                                                                                                                                                                                                                                                                                                                                                                                                                                                                                                                                                                                                                                                                                                                                                                                                                                                                                                                                                                                                                                                                                                                                                                                                                                                                                                                                                                                                                                                                                                                                                                                                                                                                                                                                                                                                      | -1.90214 | 0.78236  |         |          |   |          |         |         |   |         |         |          |   |          |         |          |   |          |         |          |   |         |         |         |   |         |          |         |   |         |          |         |   |         |          |         |   |         |          |          |   |          |          |         |   |         |          |          |   |         |         |          |   |         |          |         |   |          |          |         |   |         |          |          |   |          |         |          |   |          |         |          |   |          |         |         |   |          |          |          |   |          |          |          |   |          |          |          |   |          |          |         |   |          |          |         |   |          |          |          |   |          |          |         |   |          |          |          |
| C                                              | -3.25880                                                                                                                                                                                                                                                                                                                                                                                                                                                                                                                                                                                                                                                                                                                                                                                                                                                                                                                                                                                                                                                                                                                                                                                                                                                                                                                                                                                                                                                                                                                                                                                                                                                                                                                                                                                                                                                                                                                                                                                                                                      | -2.35095 | -0.73466 |         |          |   |          |         |         |   |         |         |          |   |          |         |          |   |          |         |          |   |         |         |         |   |         |          |         |   |         |          |         |   |         |          |         |   |         |          |          |   |          |          |         |   |         |          |          |   |         |         |          |   |         |          |         |   |          |          |         |   |         |          |          |   |          |         |          |   |          |         |          |   |          |         |         |   |          |          |          |   |          |          |          |   |          |          |          |   |          |          |         |   |          |          |         |   |          |          |          |   |          |          |         |   |          |          |          |
| H                                              | -3.62348                                                                                                                                                                                                                                                                                                                                                                                                                                                                                                                                                                                                                                                                                                                                                                                                                                                                                                                                                                                                                                                                                                                                                                                                                                                                                                                                                                                                                                                                                                                                                                                                                                                                                                                                                                                                                                                                                                                                                                                                                                      | -0.19185 | 2.22185  |         |          |   |          |         |         |   |         |         |          |   |          |         |          |   |          |         |          |   |         |         |         |   |         |          |         |   |         |          |         |   |         |          |         |   |         |          |          |   |          |          |         |   |         |          |          |   |         |         |          |   |         |          |         |   |          |          |         |   |         |          |          |   |          |         |          |   |          |         |          |   |          |         |         |   |          |          |          |   |          |          |          |   |          |          |          |   |          |          |         |   |          |          |         |   |          |          |          |   |          |          |         |   |          |          |          |
| C                                              | -2.58048                                                                                                                                                                                                                                                                                                                                                                                                                                                                                                                                                                                                                                                                                                                                                                                                                                                                                                                                                                                                                                                                                                                                                                                                                                                                                                                                                                                                                                                                                                                                                                                                                                                                                                                                                                                                                                                                                                                                                                                                                                      | -0.71777 | -2.36210 |         |          |   |          |         |         |   |         |         |          |   |          |         |          |   |          |         |          |   |         |         |         |   |         |          |         |   |         |          |         |   |         |          |         |   |         |          |          |   |          |          |         |   |         |          |          |   |         |         |          |   |         |          |         |   |          |          |         |   |         |          |          |   |          |         |          |   |          |         |          |   |          |         |         |   |          |          |          |   |          |          |          |   |          |          |          |   |          |          |         |   |          |          |         |   |          |          |          |   |          |          |         |   |          |          |          |

|   |          |          |          |
|---|----------|----------|----------|
| H | -4.54452 | -1.04008 | 3.49131  |
| C | -4.49541 | -2.47196 | -1.37213 |
| C | -4.42764 | 3.43338  | 0.95885  |
| C | -3.81250 | -0.84054 | -3.00678 |
| H | -3.38853 | 3.12052  | 1.08847  |
| C | -4.78039 | -1.71921 | -2.51379 |
| H | -4.90745 | 3.53022  | 1.93889  |
| H | 0.68387  | 0.50078  | 1.99091  |
| H | -4.45953 | 4.42061  | 0.48462  |
| O | 0.27444  | 2.11405  | -0.15534 |
| C | -0.28083 | 3.37271  | 0.19010  |
| C | 1.36660  | -0.93978 | -2.68976 |
| H | -4.02098 | -0.23872 | -3.88883 |
| H | -5.74330 | -1.81402 | -3.01058 |
| H | -5.23947 | -3.15786 | -0.97270 |
| H | -3.05382 | -2.93591 | 0.15515  |
| H | -1.83610 | -0.01770 | -2.72984 |
| H | 0.59662  | -0.63643 | -3.40662 |
| H | 1.25093  | -2.01174 | -2.49850 |
| H | 2.35077  | -0.79253 | -3.15001 |
| H | -0.32104 | -2.19436 | -1.13205 |
| H | 1.46573  | 0.93181  | -1.64701 |
| H | 1.52830  | -2.04818 | 0.72392  |
| H | 5.09703  | -3.06470 | 1.60065  |
| H | 4.68318  | -1.86333 | 2.82705  |
| H | 3.50789  | -3.11493 | 2.38941  |
| H | 3.94552  | 0.79996  | -1.23188 |
| H | 8.96629  | 1.95054  | 0.36196  |
| H | 0.53797  | 4.09336  | 0.10151  |
| H | -1.09625 | 3.65911  | -0.48540 |
| H | 9.34731  | 0.68590  | -0.80604 |
| H | -0.67018 | 3.38424  | 1.21425  |
| H | 8.83452  | 2.29924  | -1.38847 |
| O | 0.34413  | -0.16870 | 2.60685  |
| H | -0.49014 | -1.23951 | 1.34784  |
| C | -0.66513 | 0.43496  | 3.42418  |
| H | -0.21487 | 1.00669  | 4.24999  |
| H | -1.26504 | -0.38278 | 3.83029  |
| H | -1.31500 | 1.08415  | 2.82892  |
| H | 6.03314  | -0.13652 | 0.31631  |
| H | -5.01464 | 0.69645  | -0.89778 |
| H | -4.69784 | -1.53398 | 1.79023  |

Optimized Molecular Properties for **T9-TS4**

|                                                |                                                                                                                                                                                                                                                                                                                                                                                                                                                                                                                                                                                                                                                                                                                                                                                                                                                                                                                                                                                                                                                                                                                                                                                                                                                                                                                                                                                                                                                                                                                                                                                                                                                                                                                                                                                                                                                                                                                                                                                                                                              |          |          |         |          |   |          |         |          |   |         |         |          |   |          |         |          |   |          |         |          |   |         |         |         |   |         |          |         |   |         |          |          |   |         |          |          |   |         |          |          |   |          |          |         |   |         |          |          |   |         |         |          |   |         |          |         |   |          |          |         |   |         |          |          |   |          |         |          |   |          |         |          |   |          |         |         |   |          |          |          |   |          |          |          |   |          |          |          |   |          |         |         |   |          |          |         |   |          |          |         |   |          |         |         |   |          |          |          |
|------------------------------------------------|----------------------------------------------------------------------------------------------------------------------------------------------------------------------------------------------------------------------------------------------------------------------------------------------------------------------------------------------------------------------------------------------------------------------------------------------------------------------------------------------------------------------------------------------------------------------------------------------------------------------------------------------------------------------------------------------------------------------------------------------------------------------------------------------------------------------------------------------------------------------------------------------------------------------------------------------------------------------------------------------------------------------------------------------------------------------------------------------------------------------------------------------------------------------------------------------------------------------------------------------------------------------------------------------------------------------------------------------------------------------------------------------------------------------------------------------------------------------------------------------------------------------------------------------------------------------------------------------------------------------------------------------------------------------------------------------------------------------------------------------------------------------------------------------------------------------------------------------------------------------------------------------------------------------------------------------------------------------------------------------------------------------------------------------|----------|----------|---------|----------|---|----------|---------|----------|---|---------|---------|----------|---|----------|---------|----------|---|----------|---------|----------|---|---------|---------|---------|---|---------|----------|---------|---|---------|----------|----------|---|---------|----------|----------|---|---------|----------|----------|---|----------|----------|---------|---|---------|----------|----------|---|---------|---------|----------|---|---------|----------|---------|---|----------|----------|---------|---|---------|----------|----------|---|----------|---------|----------|---|----------|---------|----------|---|----------|---------|---------|---|----------|----------|----------|---|----------|----------|----------|---|----------|----------|----------|---|----------|---------|---------|---|----------|----------|---------|---|----------|----------|---------|---|----------|---------|---------|---|----------|----------|----------|
| Number of<br>(-)<br>Vibrational<br>Frequencies | 1 (-223.2375)                                                                                                                                                                                                                                                                                                                                                                                                                                                                                                                                                                                                                                                                                                                                                                                                                                                                                                                                                                                                                                                                                                                                                                                                                                                                                                                                                                                                                                                                                                                                                                                                                                                                                                                                                                                                                                                                                                                                                                                                                                |          |          |         |          |   |          |         |          |   |         |         |          |   |          |         |          |   |          |         |          |   |         |         |         |   |         |          |         |   |         |          |          |   |         |          |          |   |         |          |          |   |          |          |         |   |         |          |          |   |         |         |          |   |         |          |         |   |          |          |         |   |         |          |          |   |          |         |          |   |          |         |          |   |          |         |         |   |          |          |          |   |          |          |          |   |          |          |          |   |          |         |         |   |          |          |         |   |          |          |         |   |          |         |         |   |          |          |          |
| Absolute<br>Energies<br>(Hartrees)             | <p><b>B3LYP/6-31G(d)</b></p> <p>There are 21 positive frequencies below 100 cm<sup>-1</sup>.</p> <p>Zero-point correction: 0.572715 hartree<br/>         Enthalpy correction: 0.615548 hartree<br/>         Free Energy correction: 0.489044 hartree<br/>         Quasiharmonic Free Energy correction: 0.504377 hartree</p> <p>SCF Energy: -1626.142066 hartree<br/>         SCF Energy + ZPVE: -1625.569351 hartree<br/>         Enthalpy: -1625.526518 hartree<br/>         Free Energy: -1625.653022 hartree</p> <p>Free Energy with quasiharmonic correction: -1625.637689 hartree<br/>         (correction: 9.62 kcal/mol)</p> <p><b>B3LYP-D3/6-311+G(d,p)</b></p> <p>SCF Done: E(RB3LYP) = -1626.74916246 A.U.</p>                                                                                                                                                                                                                                                                                                                                                                                                                                                                                                                                                                                                                                                                                                                                                                                                                                                                                                                                                                                                                                                                                                                                                                                                                                                                                                                    |          |          |         |          |   |          |         |          |   |         |         |          |   |          |         |          |   |          |         |          |   |         |         |         |   |         |          |         |   |         |          |          |   |         |          |          |   |         |          |          |   |          |          |         |   |         |          |          |   |         |         |          |   |         |          |         |   |          |          |         |   |         |          |          |   |          |         |          |   |          |         |          |   |          |         |         |   |          |          |          |   |          |          |          |   |          |          |          |   |          |         |         |   |          |          |         |   |          |          |         |   |          |         |         |   |          |          |          |
| Cartesian<br>Coordinates                       | <p>69<br/>         spD3-TS4-T9.out Energy: -1020800.5031315</p> <table> <tr><td>C</td><td>5.43955</td><td>2.46643</td><td>-0.35522</td></tr> <tr><td>C</td><td>-4.62056</td><td>2.98712</td><td>-0.27799</td></tr> <tr><td>O</td><td>4.39902</td><td>2.57503</td><td>-0.98791</td></tr> <tr><td>O</td><td>-5.78376</td><td>3.34890</td><td>-0.45444</td></tr> <tr><td>N</td><td>-4.23584</td><td>1.68992</td><td>-0.22539</td></tr> <tr><td>O</td><td>5.91175</td><td>1.34652</td><td>0.16957</td></tr> <tr><td>C</td><td>4.19672</td><td>-2.01041</td><td>0.10157</td></tr> <tr><td>C</td><td>3.01468</td><td>-2.52912</td><td>-0.40454</td></tr> <tr><td>N</td><td>4.27209</td><td>-0.68461</td><td>-0.26225</td></tr> <tr><td>C</td><td>3.15674</td><td>-0.44677</td><td>-0.96662</td></tr> <tr><td>O</td><td>-1.78263</td><td>-0.14576</td><td>3.45950</td></tr> <tr><td>N</td><td>2.36594</td><td>-1.52380</td><td>-1.08748</td></tr> <tr><td>C</td><td>6.35705</td><td>3.64874</td><td>-0.07958</td></tr> <tr><td>C</td><td>5.27937</td><td>-2.69098</td><td>0.88365</td></tr> <tr><td>H</td><td>-1.57927</td><td>-0.56779</td><td>2.59590</td></tr> <tr><td>C</td><td>0.56597</td><td>-1.39898</td><td>-1.81668</td></tr> <tr><td>C</td><td>-0.53528</td><td>0.47456</td><td>-0.66437</td></tr> <tr><td>H</td><td>-3.26389</td><td>1.39854</td><td>-0.12144</td></tr> <tr><td>O</td><td>-1.39122</td><td>1.03669</td><td>0.03474</td></tr> <tr><td>C</td><td>-0.41009</td><td>-0.93425</td><td>-0.90714</td></tr> <tr><td>C</td><td>-1.26590</td><td>-1.86610</td><td>-0.07494</td></tr> <tr><td>C</td><td>-2.77482</td><td>-1.73523</td><td>-0.29583</td></tr> <tr><td>C</td><td>-2.27808</td><td>1.15547</td><td>3.20793</td></tr> <tr><td>O</td><td>-1.03113</td><td>-1.79384</td><td>1.33869</td></tr> <tr><td>C</td><td>-3.68038</td><td>-1.81500</td><td>0.77032</td></tr> <tr><td>H</td><td>-1.54820</td><td>1.79470</td><td>2.68994</td></tr> <tr><td>C</td><td>-3.28563</td><td>-1.62421</td><td>-1.59628</td></tr> </table> | C        | 5.43955  | 2.46643 | -0.35522 | C | -4.62056 | 2.98712 | -0.27799 | O | 4.39902 | 2.57503 | -0.98791 | O | -5.78376 | 3.34890 | -0.45444 | N | -4.23584 | 1.68992 | -0.22539 | O | 5.91175 | 1.34652 | 0.16957 | C | 4.19672 | -2.01041 | 0.10157 | C | 3.01468 | -2.52912 | -0.40454 | N | 4.27209 | -0.68461 | -0.26225 | C | 3.15674 | -0.44677 | -0.96662 | O | -1.78263 | -0.14576 | 3.45950 | N | 2.36594 | -1.52380 | -1.08748 | C | 6.35705 | 3.64874 | -0.07958 | C | 5.27937 | -2.69098 | 0.88365 | H | -1.57927 | -0.56779 | 2.59590 | C | 0.56597 | -1.39898 | -1.81668 | C | -0.53528 | 0.47456 | -0.66437 | H | -3.26389 | 1.39854 | -0.12144 | O | -1.39122 | 1.03669 | 0.03474 | C | -0.41009 | -0.93425 | -0.90714 | C | -1.26590 | -1.86610 | -0.07494 | C | -2.77482 | -1.73523 | -0.29583 | C | -2.27808 | 1.15547 | 3.20793 | O | -1.03113 | -1.79384 | 1.33869 | C | -3.68038 | -1.81500 | 0.77032 | H | -1.54820 | 1.79470 | 2.68994 | C | -3.28563 | -1.62421 | -1.59628 |
| C                                              | 5.43955                                                                                                                                                                                                                                                                                                                                                                                                                                                                                                                                                                                                                                                                                                                                                                                                                                                                                                                                                                                                                                                                                                                                                                                                                                                                                                                                                                                                                                                                                                                                                                                                                                                                                                                                                                                                                                                                                                                                                                                                                                      | 2.46643  | -0.35522 |         |          |   |          |         |          |   |         |         |          |   |          |         |          |   |          |         |          |   |         |         |         |   |         |          |         |   |         |          |          |   |         |          |          |   |         |          |          |   |          |          |         |   |         |          |          |   |         |         |          |   |         |          |         |   |          |          |         |   |         |          |          |   |          |         |          |   |          |         |          |   |          |         |         |   |          |          |          |   |          |          |          |   |          |          |          |   |          |         |         |   |          |          |         |   |          |          |         |   |          |         |         |   |          |          |          |
| C                                              | -4.62056                                                                                                                                                                                                                                                                                                                                                                                                                                                                                                                                                                                                                                                                                                                                                                                                                                                                                                                                                                                                                                                                                                                                                                                                                                                                                                                                                                                                                                                                                                                                                                                                                                                                                                                                                                                                                                                                                                                                                                                                                                     | 2.98712  | -0.27799 |         |          |   |          |         |          |   |         |         |          |   |          |         |          |   |          |         |          |   |         |         |         |   |         |          |         |   |         |          |          |   |         |          |          |   |         |          |          |   |          |          |         |   |         |          |          |   |         |         |          |   |         |          |         |   |          |          |         |   |         |          |          |   |          |         |          |   |          |         |          |   |          |         |         |   |          |          |          |   |          |          |          |   |          |          |          |   |          |         |         |   |          |          |         |   |          |          |         |   |          |         |         |   |          |          |          |
| O                                              | 4.39902                                                                                                                                                                                                                                                                                                                                                                                                                                                                                                                                                                                                                                                                                                                                                                                                                                                                                                                                                                                                                                                                                                                                                                                                                                                                                                                                                                                                                                                                                                                                                                                                                                                                                                                                                                                                                                                                                                                                                                                                                                      | 2.57503  | -0.98791 |         |          |   |          |         |          |   |         |         |          |   |          |         |          |   |          |         |          |   |         |         |         |   |         |          |         |   |         |          |          |   |         |          |          |   |         |          |          |   |          |          |         |   |         |          |          |   |         |         |          |   |         |          |         |   |          |          |         |   |         |          |          |   |          |         |          |   |          |         |          |   |          |         |         |   |          |          |          |   |          |          |          |   |          |          |          |   |          |         |         |   |          |          |         |   |          |          |         |   |          |         |         |   |          |          |          |
| O                                              | -5.78376                                                                                                                                                                                                                                                                                                                                                                                                                                                                                                                                                                                                                                                                                                                                                                                                                                                                                                                                                                                                                                                                                                                                                                                                                                                                                                                                                                                                                                                                                                                                                                                                                                                                                                                                                                                                                                                                                                                                                                                                                                     | 3.34890  | -0.45444 |         |          |   |          |         |          |   |         |         |          |   |          |         |          |   |          |         |          |   |         |         |         |   |         |          |         |   |         |          |          |   |         |          |          |   |         |          |          |   |          |          |         |   |         |          |          |   |         |         |          |   |         |          |         |   |          |          |         |   |         |          |          |   |          |         |          |   |          |         |          |   |          |         |         |   |          |          |          |   |          |          |          |   |          |          |          |   |          |         |         |   |          |          |         |   |          |          |         |   |          |         |         |   |          |          |          |
| N                                              | -4.23584                                                                                                                                                                                                                                                                                                                                                                                                                                                                                                                                                                                                                                                                                                                                                                                                                                                                                                                                                                                                                                                                                                                                                                                                                                                                                                                                                                                                                                                                                                                                                                                                                                                                                                                                                                                                                                                                                                                                                                                                                                     | 1.68992  | -0.22539 |         |          |   |          |         |          |   |         |         |          |   |          |         |          |   |          |         |          |   |         |         |         |   |         |          |         |   |         |          |          |   |         |          |          |   |         |          |          |   |          |          |         |   |         |          |          |   |         |         |          |   |         |          |         |   |          |          |         |   |         |          |          |   |          |         |          |   |          |         |          |   |          |         |         |   |          |          |          |   |          |          |          |   |          |          |          |   |          |         |         |   |          |          |         |   |          |          |         |   |          |         |         |   |          |          |          |
| O                                              | 5.91175                                                                                                                                                                                                                                                                                                                                                                                                                                                                                                                                                                                                                                                                                                                                                                                                                                                                                                                                                                                                                                                                                                                                                                                                                                                                                                                                                                                                                                                                                                                                                                                                                                                                                                                                                                                                                                                                                                                                                                                                                                      | 1.34652  | 0.16957  |         |          |   |          |         |          |   |         |         |          |   |          |         |          |   |          |         |          |   |         |         |         |   |         |          |         |   |         |          |          |   |         |          |          |   |         |          |          |   |          |          |         |   |         |          |          |   |         |         |          |   |         |          |         |   |          |          |         |   |         |          |          |   |          |         |          |   |          |         |          |   |          |         |         |   |          |          |          |   |          |          |          |   |          |          |          |   |          |         |         |   |          |          |         |   |          |          |         |   |          |         |         |   |          |          |          |
| C                                              | 4.19672                                                                                                                                                                                                                                                                                                                                                                                                                                                                                                                                                                                                                                                                                                                                                                                                                                                                                                                                                                                                                                                                                                                                                                                                                                                                                                                                                                                                                                                                                                                                                                                                                                                                                                                                                                                                                                                                                                                                                                                                                                      | -2.01041 | 0.10157  |         |          |   |          |         |          |   |         |         |          |   |          |         |          |   |          |         |          |   |         |         |         |   |         |          |         |   |         |          |          |   |         |          |          |   |         |          |          |   |          |          |         |   |         |          |          |   |         |         |          |   |         |          |         |   |          |          |         |   |         |          |          |   |          |         |          |   |          |         |          |   |          |         |         |   |          |          |          |   |          |          |          |   |          |          |          |   |          |         |         |   |          |          |         |   |          |          |         |   |          |         |         |   |          |          |          |
| C                                              | 3.01468                                                                                                                                                                                                                                                                                                                                                                                                                                                                                                                                                                                                                                                                                                                                                                                                                                                                                                                                                                                                                                                                                                                                                                                                                                                                                                                                                                                                                                                                                                                                                                                                                                                                                                                                                                                                                                                                                                                                                                                                                                      | -2.52912 | -0.40454 |         |          |   |          |         |          |   |         |         |          |   |          |         |          |   |          |         |          |   |         |         |         |   |         |          |         |   |         |          |          |   |         |          |          |   |         |          |          |   |          |          |         |   |         |          |          |   |         |         |          |   |         |          |         |   |          |          |         |   |         |          |          |   |          |         |          |   |          |         |          |   |          |         |         |   |          |          |          |   |          |          |          |   |          |          |          |   |          |         |         |   |          |          |         |   |          |          |         |   |          |         |         |   |          |          |          |
| N                                              | 4.27209                                                                                                                                                                                                                                                                                                                                                                                                                                                                                                                                                                                                                                                                                                                                                                                                                                                                                                                                                                                                                                                                                                                                                                                                                                                                                                                                                                                                                                                                                                                                                                                                                                                                                                                                                                                                                                                                                                                                                                                                                                      | -0.68461 | -0.26225 |         |          |   |          |         |          |   |         |         |          |   |          |         |          |   |          |         |          |   |         |         |         |   |         |          |         |   |         |          |          |   |         |          |          |   |         |          |          |   |          |          |         |   |         |          |          |   |         |         |          |   |         |          |         |   |          |          |         |   |         |          |          |   |          |         |          |   |          |         |          |   |          |         |         |   |          |          |          |   |          |          |          |   |          |          |          |   |          |         |         |   |          |          |         |   |          |          |         |   |          |         |         |   |          |          |          |
| C                                              | 3.15674                                                                                                                                                                                                                                                                                                                                                                                                                                                                                                                                                                                                                                                                                                                                                                                                                                                                                                                                                                                                                                                                                                                                                                                                                                                                                                                                                                                                                                                                                                                                                                                                                                                                                                                                                                                                                                                                                                                                                                                                                                      | -0.44677 | -0.96662 |         |          |   |          |         |          |   |         |         |          |   |          |         |          |   |          |         |          |   |         |         |         |   |         |          |         |   |         |          |          |   |         |          |          |   |         |          |          |   |          |          |         |   |         |          |          |   |         |         |          |   |         |          |         |   |          |          |         |   |         |          |          |   |          |         |          |   |          |         |          |   |          |         |         |   |          |          |          |   |          |          |          |   |          |          |          |   |          |         |         |   |          |          |         |   |          |          |         |   |          |         |         |   |          |          |          |
| O                                              | -1.78263                                                                                                                                                                                                                                                                                                                                                                                                                                                                                                                                                                                                                                                                                                                                                                                                                                                                                                                                                                                                                                                                                                                                                                                                                                                                                                                                                                                                                                                                                                                                                                                                                                                                                                                                                                                                                                                                                                                                                                                                                                     | -0.14576 | 3.45950  |         |          |   |          |         |          |   |         |         |          |   |          |         |          |   |          |         |          |   |         |         |         |   |         |          |         |   |         |          |          |   |         |          |          |   |         |          |          |   |          |          |         |   |         |          |          |   |         |         |          |   |         |          |         |   |          |          |         |   |         |          |          |   |          |         |          |   |          |         |          |   |          |         |         |   |          |          |          |   |          |          |          |   |          |          |          |   |          |         |         |   |          |          |         |   |          |          |         |   |          |         |         |   |          |          |          |
| N                                              | 2.36594                                                                                                                                                                                                                                                                                                                                                                                                                                                                                                                                                                                                                                                                                                                                                                                                                                                                                                                                                                                                                                                                                                                                                                                                                                                                                                                                                                                                                                                                                                                                                                                                                                                                                                                                                                                                                                                                                                                                                                                                                                      | -1.52380 | -1.08748 |         |          |   |          |         |          |   |         |         |          |   |          |         |          |   |          |         |          |   |         |         |         |   |         |          |         |   |         |          |          |   |         |          |          |   |         |          |          |   |          |          |         |   |         |          |          |   |         |         |          |   |         |          |         |   |          |          |         |   |         |          |          |   |          |         |          |   |          |         |          |   |          |         |         |   |          |          |          |   |          |          |          |   |          |          |          |   |          |         |         |   |          |          |         |   |          |          |         |   |          |         |         |   |          |          |          |
| C                                              | 6.35705                                                                                                                                                                                                                                                                                                                                                                                                                                                                                                                                                                                                                                                                                                                                                                                                                                                                                                                                                                                                                                                                                                                                                                                                                                                                                                                                                                                                                                                                                                                                                                                                                                                                                                                                                                                                                                                                                                                                                                                                                                      | 3.64874  | -0.07958 |         |          |   |          |         |          |   |         |         |          |   |          |         |          |   |          |         |          |   |         |         |         |   |         |          |         |   |         |          |          |   |         |          |          |   |         |          |          |   |          |          |         |   |         |          |          |   |         |         |          |   |         |          |         |   |          |          |         |   |         |          |          |   |          |         |          |   |          |         |          |   |          |         |         |   |          |          |          |   |          |          |          |   |          |          |          |   |          |         |         |   |          |          |         |   |          |          |         |   |          |         |         |   |          |          |          |
| C                                              | 5.27937                                                                                                                                                                                                                                                                                                                                                                                                                                                                                                                                                                                                                                                                                                                                                                                                                                                                                                                                                                                                                                                                                                                                                                                                                                                                                                                                                                                                                                                                                                                                                                                                                                                                                                                                                                                                                                                                                                                                                                                                                                      | -2.69098 | 0.88365  |         |          |   |          |         |          |   |         |         |          |   |          |         |          |   |          |         |          |   |         |         |         |   |         |          |         |   |         |          |          |   |         |          |          |   |         |          |          |   |          |          |         |   |         |          |          |   |         |         |          |   |         |          |         |   |          |          |         |   |         |          |          |   |          |         |          |   |          |         |          |   |          |         |         |   |          |          |          |   |          |          |          |   |          |          |          |   |          |         |         |   |          |          |         |   |          |          |         |   |          |         |         |   |          |          |          |
| H                                              | -1.57927                                                                                                                                                                                                                                                                                                                                                                                                                                                                                                                                                                                                                                                                                                                                                                                                                                                                                                                                                                                                                                                                                                                                                                                                                                                                                                                                                                                                                                                                                                                                                                                                                                                                                                                                                                                                                                                                                                                                                                                                                                     | -0.56779 | 2.59590  |         |          |   |          |         |          |   |         |         |          |   |          |         |          |   |          |         |          |   |         |         |         |   |         |          |         |   |         |          |          |   |         |          |          |   |         |          |          |   |          |          |         |   |         |          |          |   |         |         |          |   |         |          |         |   |          |          |         |   |         |          |          |   |          |         |          |   |          |         |          |   |          |         |         |   |          |          |          |   |          |          |          |   |          |          |          |   |          |         |         |   |          |          |         |   |          |          |         |   |          |         |         |   |          |          |          |
| C                                              | 0.56597                                                                                                                                                                                                                                                                                                                                                                                                                                                                                                                                                                                                                                                                                                                                                                                                                                                                                                                                                                                                                                                                                                                                                                                                                                                                                                                                                                                                                                                                                                                                                                                                                                                                                                                                                                                                                                                                                                                                                                                                                                      | -1.39898 | -1.81668 |         |          |   |          |         |          |   |         |         |          |   |          |         |          |   |          |         |          |   |         |         |         |   |         |          |         |   |         |          |          |   |         |          |          |   |         |          |          |   |          |          |         |   |         |          |          |   |         |         |          |   |         |          |         |   |          |          |         |   |         |          |          |   |          |         |          |   |          |         |          |   |          |         |         |   |          |          |          |   |          |          |          |   |          |          |          |   |          |         |         |   |          |          |         |   |          |          |         |   |          |         |         |   |          |          |          |
| C                                              | -0.53528                                                                                                                                                                                                                                                                                                                                                                                                                                                                                                                                                                                                                                                                                                                                                                                                                                                                                                                                                                                                                                                                                                                                                                                                                                                                                                                                                                                                                                                                                                                                                                                                                                                                                                                                                                                                                                                                                                                                                                                                                                     | 0.47456  | -0.66437 |         |          |   |          |         |          |   |         |         |          |   |          |         |          |   |          |         |          |   |         |         |         |   |         |          |         |   |         |          |          |   |         |          |          |   |         |          |          |   |          |          |         |   |         |          |          |   |         |         |          |   |         |          |         |   |          |          |         |   |         |          |          |   |          |         |          |   |          |         |          |   |          |         |         |   |          |          |          |   |          |          |          |   |          |          |          |   |          |         |         |   |          |          |         |   |          |          |         |   |          |         |         |   |          |          |          |
| H                                              | -3.26389                                                                                                                                                                                                                                                                                                                                                                                                                                                                                                                                                                                                                                                                                                                                                                                                                                                                                                                                                                                                                                                                                                                                                                                                                                                                                                                                                                                                                                                                                                                                                                                                                                                                                                                                                                                                                                                                                                                                                                                                                                     | 1.39854  | -0.12144 |         |          |   |          |         |          |   |         |         |          |   |          |         |          |   |          |         |          |   |         |         |         |   |         |          |         |   |         |          |          |   |         |          |          |   |         |          |          |   |          |          |         |   |         |          |          |   |         |         |          |   |         |          |         |   |          |          |         |   |         |          |          |   |          |         |          |   |          |         |          |   |          |         |         |   |          |          |          |   |          |          |          |   |          |          |          |   |          |         |         |   |          |          |         |   |          |          |         |   |          |         |         |   |          |          |          |
| O                                              | -1.39122                                                                                                                                                                                                                                                                                                                                                                                                                                                                                                                                                                                                                                                                                                                                                                                                                                                                                                                                                                                                                                                                                                                                                                                                                                                                                                                                                                                                                                                                                                                                                                                                                                                                                                                                                                                                                                                                                                                                                                                                                                     | 1.03669  | 0.03474  |         |          |   |          |         |          |   |         |         |          |   |          |         |          |   |          |         |          |   |         |         |         |   |         |          |         |   |         |          |          |   |         |          |          |   |         |          |          |   |          |          |         |   |         |          |          |   |         |         |          |   |         |          |         |   |          |          |         |   |         |          |          |   |          |         |          |   |          |         |          |   |          |         |         |   |          |          |          |   |          |          |          |   |          |          |          |   |          |         |         |   |          |          |         |   |          |          |         |   |          |         |         |   |          |          |          |
| C                                              | -0.41009                                                                                                                                                                                                                                                                                                                                                                                                                                                                                                                                                                                                                                                                                                                                                                                                                                                                                                                                                                                                                                                                                                                                                                                                                                                                                                                                                                                                                                                                                                                                                                                                                                                                                                                                                                                                                                                                                                                                                                                                                                     | -0.93425 | -0.90714 |         |          |   |          |         |          |   |         |         |          |   |          |         |          |   |          |         |          |   |         |         |         |   |         |          |         |   |         |          |          |   |         |          |          |   |         |          |          |   |          |          |         |   |         |          |          |   |         |         |          |   |         |          |         |   |          |          |         |   |         |          |          |   |          |         |          |   |          |         |          |   |          |         |         |   |          |          |          |   |          |          |          |   |          |          |          |   |          |         |         |   |          |          |         |   |          |          |         |   |          |         |         |   |          |          |          |
| C                                              | -1.26590                                                                                                                                                                                                                                                                                                                                                                                                                                                                                                                                                                                                                                                                                                                                                                                                                                                                                                                                                                                                                                                                                                                                                                                                                                                                                                                                                                                                                                                                                                                                                                                                                                                                                                                                                                                                                                                                                                                                                                                                                                     | -1.86610 | -0.07494 |         |          |   |          |         |          |   |         |         |          |   |          |         |          |   |          |         |          |   |         |         |         |   |         |          |         |   |         |          |          |   |         |          |          |   |         |          |          |   |          |          |         |   |         |          |          |   |         |         |          |   |         |          |         |   |          |          |         |   |         |          |          |   |          |         |          |   |          |         |          |   |          |         |         |   |          |          |          |   |          |          |          |   |          |          |          |   |          |         |         |   |          |          |         |   |          |          |         |   |          |         |         |   |          |          |          |
| C                                              | -2.77482                                                                                                                                                                                                                                                                                                                                                                                                                                                                                                                                                                                                                                                                                                                                                                                                                                                                                                                                                                                                                                                                                                                                                                                                                                                                                                                                                                                                                                                                                                                                                                                                                                                                                                                                                                                                                                                                                                                                                                                                                                     | -1.73523 | -0.29583 |         |          |   |          |         |          |   |         |         |          |   |          |         |          |   |          |         |          |   |         |         |         |   |         |          |         |   |         |          |          |   |         |          |          |   |         |          |          |   |          |          |         |   |         |          |          |   |         |         |          |   |         |          |         |   |          |          |         |   |         |          |          |   |          |         |          |   |          |         |          |   |          |         |         |   |          |          |          |   |          |          |          |   |          |          |          |   |          |         |         |   |          |          |         |   |          |          |         |   |          |         |         |   |          |          |          |
| C                                              | -2.27808                                                                                                                                                                                                                                                                                                                                                                                                                                                                                                                                                                                                                                                                                                                                                                                                                                                                                                                                                                                                                                                                                                                                                                                                                                                                                                                                                                                                                                                                                                                                                                                                                                                                                                                                                                                                                                                                                                                                                                                                                                     | 1.15547  | 3.20793  |         |          |   |          |         |          |   |         |         |          |   |          |         |          |   |          |         |          |   |         |         |         |   |         |          |         |   |         |          |          |   |         |          |          |   |         |          |          |   |          |          |         |   |         |          |          |   |         |         |          |   |         |          |         |   |          |          |         |   |         |          |          |   |          |         |          |   |          |         |          |   |          |         |         |   |          |          |          |   |          |          |          |   |          |          |          |   |          |         |         |   |          |          |         |   |          |          |         |   |          |         |         |   |          |          |          |
| O                                              | -1.03113                                                                                                                                                                                                                                                                                                                                                                                                                                                                                                                                                                                                                                                                                                                                                                                                                                                                                                                                                                                                                                                                                                                                                                                                                                                                                                                                                                                                                                                                                                                                                                                                                                                                                                                                                                                                                                                                                                                                                                                                                                     | -1.79384 | 1.33869  |         |          |   |          |         |          |   |         |         |          |   |          |         |          |   |          |         |          |   |         |         |         |   |         |          |         |   |         |          |          |   |         |          |          |   |         |          |          |   |          |          |         |   |         |          |          |   |         |         |          |   |         |          |         |   |          |          |         |   |         |          |          |   |          |         |          |   |          |         |          |   |          |         |         |   |          |          |          |   |          |          |          |   |          |          |          |   |          |         |         |   |          |          |         |   |          |          |         |   |          |         |         |   |          |          |          |
| C                                              | -3.68038                                                                                                                                                                                                                                                                                                                                                                                                                                                                                                                                                                                                                                                                                                                                                                                                                                                                                                                                                                                                                                                                                                                                                                                                                                                                                                                                                                                                                                                                                                                                                                                                                                                                                                                                                                                                                                                                                                                                                                                                                                     | -1.81500 | 0.77032  |         |          |   |          |         |          |   |         |         |          |   |          |         |          |   |          |         |          |   |         |         |         |   |         |          |         |   |         |          |          |   |         |          |          |   |         |          |          |   |          |          |         |   |         |          |          |   |         |         |          |   |         |          |         |   |          |          |         |   |         |          |          |   |          |         |          |   |          |         |          |   |          |         |         |   |          |          |          |   |          |          |          |   |          |          |          |   |          |         |         |   |          |          |         |   |          |          |         |   |          |         |         |   |          |          |          |
| H                                              | -1.54820                                                                                                                                                                                                                                                                                                                                                                                                                                                                                                                                                                                                                                                                                                                                                                                                                                                                                                                                                                                                                                                                                                                                                                                                                                                                                                                                                                                                                                                                                                                                                                                                                                                                                                                                                                                                                                                                                                                                                                                                                                     | 1.79470  | 2.68994  |         |          |   |          |         |          |   |         |         |          |   |          |         |          |   |          |         |          |   |         |         |         |   |         |          |         |   |         |          |          |   |         |          |          |   |         |          |          |   |          |          |         |   |         |          |          |   |         |         |          |   |         |          |         |   |          |          |         |   |         |          |          |   |          |         |          |   |          |         |          |   |          |         |         |   |          |          |          |   |          |          |          |   |          |          |          |   |          |         |         |   |          |          |         |   |          |          |         |   |          |         |         |   |          |          |          |
| C                                              | -3.28563                                                                                                                                                                                                                                                                                                                                                                                                                                                                                                                                                                                                                                                                                                                                                                                                                                                                                                                                                                                                                                                                                                                                                                                                                                                                                                                                                                                                                                                                                                                                                                                                                                                                                                                                                                                                                                                                                                                                                                                                                                     | -1.62421 | -1.59628 |         |          |   |          |         |          |   |         |         |          |   |          |         |          |   |          |         |          |   |         |         |         |   |         |          |         |   |         |          |          |   |         |          |          |   |         |          |          |   |          |          |         |   |         |          |          |   |         |         |          |   |         |          |         |   |          |          |         |   |         |          |          |   |          |         |          |   |          |         |          |   |          |         |         |   |          |          |          |   |          |          |          |   |          |          |          |   |          |         |         |   |          |          |         |   |          |          |         |   |          |         |         |   |          |          |          |

|   |          |          |          |
|---|----------|----------|----------|
| H | -2.51101 | 1.60976  | 4.17921  |
| C | -5.05799 | -1.78178 | 0.53802  |
| C | -3.48943 | 3.99500  | -0.08954 |
| C | -4.66003 | -1.59831 | -1.83132 |
| H | -2.51233 | 3.51966  | 0.02763  |
| C | -5.55720 | -1.67955 | -0.76233 |
| H | -3.70481 | 4.60557  | 0.79410  |
| H | 2.24395  | -1.85835 | 1.55449  |
| H | -3.47011 | 4.66946  | -0.95237 |
| O | 0.43664  | 1.22895  | -1.29048 |
| C | 0.40761  | 2.63419  | -1.05811 |
| C | 0.49790  | -2.77792 | -2.44432 |
| H | -5.03165 | -1.50432 | -2.84940 |
| H | -6.62977 | -1.65614 | -0.94109 |
| H | -5.74352 | -1.83204 | 1.38113  |
| H | -3.29909 | -1.87854 | 1.78285  |
| H | -2.59013 | -1.53389 | -2.42648 |
| H | -0.40764 | -2.86503 | -3.05856 |
| H | 0.46457  | -3.57950 | -1.69985 |
| H | 1.36885  | -2.94977 | -3.08265 |
| H | -1.02180 | -2.89323 | -0.39001 |
| H | 0.91172  | -0.64111 | -2.51138 |
| H | 2.62228  | -3.53701 | -0.35235 |
| H | 6.22547  | -2.71639 | 0.32621  |
| H | 5.48085  | -2.17528 | 1.83134  |
| H | 5.00056  | -3.72461 | 1.11688  |
| H | 2.91223  | 0.52545  | -1.36785 |
| H | 6.44931  | 3.80481  | 1.00109  |
| H | 1.37790  | 3.00842  | -1.39199 |
| H | -0.40008 | 3.11402  | -1.62459 |
| H | 7.36226  | 3.44232  | -0.46327 |
| H | 0.26549  | 2.85312  | 0.00355  |
| H | 5.95687  | 4.54901  | -0.54927 |
| O | 1.56404  | -1.71020 | 2.24032  |
| H | -0.06223 | -1.85302 | 1.51574  |
| C | 1.64219  | -0.34955 | 2.67386  |
| H | 2.53673  | -0.18194 | 3.29083  |
| H | 0.74619  | -0.15747 | 3.26960  |
| H | 1.66317  | 0.34625  | 1.82621  |
| H | 5.26867  | 0.54145  | -0.00680 |
| H | -4.93601 | 0.97213  | -0.35727 |
| H | -3.19687 | 1.14973  | 2.60232  |

Optimized Molecular Properties for **T9-product**

|                                                |                                                                                                                                                                                                                                                                                                                                                                                                                                                                                                                                                                                                                                                                                                                       |                          |                   |
|------------------------------------------------|-----------------------------------------------------------------------------------------------------------------------------------------------------------------------------------------------------------------------------------------------------------------------------------------------------------------------------------------------------------------------------------------------------------------------------------------------------------------------------------------------------------------------------------------------------------------------------------------------------------------------------------------------------------------------------------------------------------------------|--------------------------|-------------------|
| Number of<br>(-)<br>Vibrational<br>Frequencies | 0                                                                                                                                                                                                                                                                                                                                                                                                                                                                                                                                                                                                                                                                                                                     |                          |                   |
| Absolute<br>Energies<br>(Hartrees)             | <p><b>B3LYP/6-31G(d)</b></p> <p>There are 24 positive frequencies below 100 cm<sup>-1</sup>.</p> <p>Zero-point correction: 0.572855 hartree<br/>         Enthalpy correction: 0.616929 hartree<br/>         Free Energy correction: 0.485195 hartree<br/>         Quasiharmonic Free Energy correction: 0.503410 hartree</p> <p>SCF Energy: -1626.179289 hartree<br/>         SCF Energy + ZPVE: -1625.606434 hartree<br/>         Enthalpy: -1625.562360 hartree<br/>         Free Energy: -1625.694094 hartree</p> <p>Free Energy with quasiharmonic correction: -1625.675879 hartree<br/>         (correction: 11.43 kcal/mol)</p> <p><b>B3LYP-D3/6-311+G(d,p)</b></p> <p>SCF Done: E(RB3LYP) = -1626.78174933</p> |                          |                   |
| Cartesian<br>Coordinates                       | 69<br>spD3-product-T9.out                                                                                                                                                                                                                                                                                                                                                                                                                                                                                                                                                                                                                                                                                             | Energy: -1020820.9517010 |                   |
|                                                | C                                                                                                                                                                                                                                                                                                                                                                                                                                                                                                                                                                                                                                                                                                                     | 4.67325                  | 3.03789 -0.27921  |
|                                                | C                                                                                                                                                                                                                                                                                                                                                                                                                                                                                                                                                                                                                                                                                                                     | -4.87950                 | 2.91981 0.38976   |
|                                                | O                                                                                                                                                                                                                                                                                                                                                                                                                                                                                                                                                                                                                                                                                                                     | 3.53068                  | 2.66569 0.08184   |
|                                                | O                                                                                                                                                                                                                                                                                                                                                                                                                                                                                                                                                                                                                                                                                                                     | -6.02535                 | 3.34298 0.25398   |
|                                                | N                                                                                                                                                                                                                                                                                                                                                                                                                                                                                                                                                                                                                                                                                                                     | -4.50514                 | 1.65815 0.05818   |
|                                                | O                                                                                                                                                                                                                                                                                                                                                                                                                                                                                                                                                                                                                                                                                                                     | 5.68465                  | 2.29405 -0.48133  |
|                                                | C                                                                                                                                                                                                                                                                                                                                                                                                                                                                                                                                                                                                                                                                                                                     | 5.54384                  | -1.40081 -0.09574 |
|                                                | C                                                                                                                                                                                                                                                                                                                                                                                                                                                                                                                                                                                                                                                                                                                     | 4.62196                  | -2.37447 0.21996  |
|                                                | N                                                                                                                                                                                                                                                                                                                                                                                                                                                                                                                                                                                                                                                                                                                     | 4.85777                  | -0.20867 -0.02874 |
|                                                | C                                                                                                                                                                                                                                                                                                                                                                                                                                                                                                                                                                                                                                                                                                                     | 3.58482                  | -0.49208 0.31383  |
|                                                | O                                                                                                                                                                                                                                                                                                                                                                                                                                                                                                                                                                                                                                                                                                                     | -2.51263                 | -1.60273 3.11473  |
|                                                | N                                                                                                                                                                                                                                                                                                                                                                                                                                                                                                                                                                                                                                                                                                                     | 3.39220                  | -1.80073 0.47409  |
|                                                | C                                                                                                                                                                                                                                                                                                                                                                                                                                                                                                                                                                                                                                                                                                                     | 4.87885                  | 4.54757 -0.51718  |
|                                                | C                                                                                                                                                                                                                                                                                                                                                                                                                                                                                                                                                                                                                                                                                                                     | 6.99404                  | -1.48382 -0.44974 |
|                                                | H                                                                                                                                                                                                                                                                                                                                                                                                                                                                                                                                                                                                                                                                                                                     | -2.10572                 | -1.67778 2.22629  |
|                                                | C                                                                                                                                                                                                                                                                                                                                                                                                                                                                                                                                                                                                                                                                                                                     | 0.70639                  | -0.87335 -1.81727 |
|                                                | C                                                                                                                                                                                                                                                                                                                                                                                                                                                                                                                                                                                                                                                                                                                     | -0.58332                 | 0.56890 -0.31235  |
|                                                | H                                                                                                                                                                                                                                                                                                                                                                                                                                                                                                                                                                                                                                                                                                                     | -3.54651                 | 1.32879 0.11701   |
|                                                | O                                                                                                                                                                                                                                                                                                                                                                                                                                                                                                                                                                                                                                                                                                                     | -1.62681                 | 0.89980 0.23511   |
|                                                | C                                                                                                                                                                                                                                                                                                                                                                                                                                                                                                                                                                                                                                                                                                                     | -0.37029                 | -0.73271 -1.01869 |
|                                                | C                                                                                                                                                                                                                                                                                                                                                                                                                                                                                                                                                                                                                                                                                                                     | -1.34652                 | -1.85437 -0.68783 |
|                                                | C                                                                                                                                                                                                                                                                                                                                                                                                                                                                                                                                                                                                                                                                                                                     | -2.79275                 | -1.59104 -1.09529 |
|                                                | C                                                                                                                                                                                                                                                                                                                                                                                                                                                                                                                                                                                                                                                                                                                     | -2.82140                 | -0.23848 3.33024  |
|                                                | O                                                                                                                                                                                                                                                                                                                                                                                                                                                                                                                                                                                                                                                                                                                     | -1.28684                 | -2.18336 0.68842  |
|                                                | C                                                                                                                                                                                                                                                                                                                                                                                                                                                                                                                                                                                                                                                                                                                     | -3.85522                 | -1.91251 -0.24283 |
|                                                | H                                                                                                                                                                                                                                                                                                                                                                                                                                                                                                                                                                                                                                                                                                                     | -1.93420                 | 0.41178 3.27800   |
|                                                | C                                                                                                                                                                                                                                                                                                                                                                                                                                                                                                                                                                                                                                                                                                                     | -3.07991                 | -1.11120 -2.38048 |



|   |          |          |          |
|---|----------|----------|----------|
| H | -3.24720 | -0.15352 | 4.33694  |
| C | -5.17629 | -1.75449 | -0.67086 |
| C | -3.76495 | 3.78766  | 0.96626  |
| C | -4.39771 | -0.95257 | -2.80719 |
| H | -2.79413 | 3.28552  | 0.98065  |
| C | -5.45539 | -1.27748 | -1.95331 |
| H | -4.03607 | 4.07818  | 1.98692  |
| H | 1.95504  | -2.51712 | 1.12157  |
| H | -3.69321 | 4.70686  | 0.37576  |
| O | 0.50797  | 1.34434  | -0.32983 |
| C | 0.43762  | 2.63883  | 0.30050  |
| C | 1.17056  | -2.08107 | -2.57211 |
| H | -4.59936 | -0.57166 | -3.80553 |
| H | -6.48421 | -1.15707 | -2.28403 |
| H | -5.98982 | -2.00449 | 0.00608  |
| H | -3.64661 | -2.26749 | 0.75980  |
| H | -2.26162 | -0.85083 | -3.04771 |
| H | 1.36656  | -1.82310 | -3.62115 |
| H | 0.47400  | -2.92237 | -2.55018 |
| H | 2.12511  | -2.41181 | -2.14136 |
| H | -1.03113 | -2.73490 | -1.26658 |
| H | 1.36254  | -0.01175 | -1.90781 |
| H | 4.77149  | -3.44527 | 0.28249  |
| H | 7.19571  | -1.07623 | -1.44896 |
| H | 7.61935  | -0.92155 | 0.25579  |
| H | 7.32708  | -2.52717 | -0.43767 |
| H | 2.84944  | 0.29127  | 0.42418  |
| H | 4.53519  | 5.11274  | 0.35725  |
| H | 1.46058  | 3.01830  | 0.25239  |
| H | -0.26837 | 3.27698  | -0.24134 |
| H | 5.92651  | 4.78590  | -0.72230 |
| H | 0.09803  | 2.52964  | 1.33436  |
| H | 4.26493  | 4.87082  | -1.36763 |
| O | 1.12340  | -2.85700 | 1.57909  |
| H | -0.35136 | -2.45366 | 0.92371  |
| C | 1.14419  | -2.39028 | 2.92217  |
| H | 1.70516  | -3.07687 | 3.57482  |
| H | 0.11305  | -2.32638 | 3.28632  |
| H | 1.60309  | -1.39509 | 2.99936  |
| H | 5.21994  | 0.78702  | -0.20946 |
| H | -5.19141 | 1.04266  | -0.35640 |
| H | -3.56004 | 0.14865  | 2.61183  |

Optimized Molecular Properties for TArg-Int1

|                                                |                                                                                                                                                                                                                                                                                                                                                                                                                                                                                                                                                                                                                                                                                                                                                                                                                                                                                                                                                                                                                                                                                                                                                                                                                                                                                                                                                                                                                                                                                                                                                                                                                                                                                                                                                                                                                                                                                                                                                                           |          |          |         |         |   |         |         |          |   |         |          |         |   |         |          |          |   |         |          |          |   |         |          |          |   |         |          |          |   |         |          |          |   |         |         |         |   |         |          |          |   |         |          |          |   |          |         |         |   |          |          |         |   |          |          |          |   |          |         |          |   |          |         |          |   |          |         |          |   |          |         |         |   |          |         |          |   |          |         |         |   |         |         |          |   |          |         |         |   |          |          |          |   |         |         |         |   |         |         |         |   |         |          |          |
|------------------------------------------------|---------------------------------------------------------------------------------------------------------------------------------------------------------------------------------------------------------------------------------------------------------------------------------------------------------------------------------------------------------------------------------------------------------------------------------------------------------------------------------------------------------------------------------------------------------------------------------------------------------------------------------------------------------------------------------------------------------------------------------------------------------------------------------------------------------------------------------------------------------------------------------------------------------------------------------------------------------------------------------------------------------------------------------------------------------------------------------------------------------------------------------------------------------------------------------------------------------------------------------------------------------------------------------------------------------------------------------------------------------------------------------------------------------------------------------------------------------------------------------------------------------------------------------------------------------------------------------------------------------------------------------------------------------------------------------------------------------------------------------------------------------------------------------------------------------------------------------------------------------------------------------------------------------------------------------------------------------------------------|----------|----------|---------|---------|---|---------|---------|----------|---|---------|----------|---------|---|---------|----------|----------|---|---------|----------|----------|---|---------|----------|----------|---|---------|----------|----------|---|---------|----------|----------|---|---------|---------|---------|---|---------|----------|----------|---|---------|----------|----------|---|----------|---------|---------|---|----------|----------|---------|---|----------|----------|----------|---|----------|---------|----------|---|----------|---------|----------|---|----------|---------|----------|---|----------|---------|---------|---|----------|---------|----------|---|----------|---------|---------|---|---------|---------|----------|---|----------|---------|---------|---|----------|----------|----------|---|---------|---------|---------|---|---------|---------|---------|---|---------|----------|----------|
| Number of<br>(-)<br>Vibrational<br>Frequencies | 0                                                                                                                                                                                                                                                                                                                                                                                                                                                                                                                                                                                                                                                                                                                                                                                                                                                                                                                                                                                                                                                                                                                                                                                                                                                                                                                                                                                                                                                                                                                                                                                                                                                                                                                                                                                                                                                                                                                                                                         |          |          |         |         |   |         |         |          |   |         |          |         |   |         |          |          |   |         |          |          |   |         |          |          |   |         |          |          |   |         |          |          |   |         |         |         |   |         |          |          |   |         |          |          |   |          |         |         |   |          |          |         |   |          |          |          |   |          |         |          |   |          |         |          |   |          |         |          |   |          |         |         |   |          |         |          |   |          |         |         |   |         |         |          |   |          |         |         |   |          |          |          |   |         |         |         |   |         |         |         |   |         |          |          |
| Absolute<br>Energies<br>(Hartrees)             | <p><b>B3LYP/6-31G(d) (PCM)</b></p> <p>There are 20 positive frequencies below 100 cm<sup>-1</sup>.</p> <p>Zero-point correction: 0.560791 hartree<br/>         Enthalpy correction: 0.601910 hartree<br/>         Free Energy correction: 0.480874 hartree<br/>         Quasiharmonic Free Energy correction: 0.497583 hartree</p> <p>SCF Energy: -1546.445654 hartree<br/>         SCF Energy + ZPVE: -1545.884863 hartree<br/>         Enthalpy: -1545.843744 hartree<br/>         Free Energy: -1545.964780 hartree</p> <p>Free Energy with quasiharmonic correction: -1545.948071 hartree<br/>         (correction: 10.49 kcal/mol)</p> <p><b>B3LYP-D3/6-311+G(d,p) (PCM)</b></p> <p>SCF Done: E(RB3LYP) = -1546.99857596 A.U.</p>                                                                                                                                                                                                                                                                                                                                                                                                                                                                                                                                                                                                                                                                                                                                                                                                                                                                                                                                                                                                                                                                                                                                                                                                                                    |          |          |         |         |   |         |         |          |   |         |          |         |   |         |          |          |   |         |          |          |   |         |          |          |   |         |          |          |   |         |          |          |   |         |         |         |   |         |          |          |   |         |          |          |   |          |         |         |   |          |          |         |   |          |          |          |   |          |         |          |   |          |         |          |   |          |         |          |   |          |         |         |   |          |         |          |   |          |         |         |   |         |         |          |   |          |         |         |   |          |          |          |   |         |         |         |   |         |         |         |   |         |          |          |
| Cartesian<br>Coordinates                       | <p>(PCM)</p> <p>67</p> <p>spD3-R-TS2-Targ.out Energy: -970756.2549444</p> <table> <tr><td>C</td><td>6.79119</td><td>0.11935</td><td>0.18681</td></tr> <tr><td>O</td><td>5.97547</td><td>0.98698</td><td>-0.09495</td></tr> <tr><td>O</td><td>6.52475</td><td>-1.18292</td><td>0.21205</td></tr> <tr><td>C</td><td>3.13819</td><td>-2.72580</td><td>-0.57192</td></tr> <tr><td>C</td><td>1.87415</td><td>-2.30773</td><td>-0.91466</td></tr> <tr><td>N</td><td>3.95190</td><td>-1.61615</td><td>-0.44031</td></tr> <tr><td>C</td><td>3.18500</td><td>-0.56496</td><td>-0.70179</td></tr> <tr><td>N</td><td>1.91851</td><td>-0.93016</td><td>-0.99531</td></tr> <tr><td>C</td><td>8.23210</td><td>0.41592</td><td>0.54888</td></tr> <tr><td>C</td><td>3.64665</td><td>-4.11655</td><td>-0.35072</td></tr> <tr><td>C</td><td>0.78849</td><td>-0.00856</td><td>-1.36237</td></tr> <tr><td>C</td><td>-0.52072</td><td>0.07306</td><td>0.80331</td></tr> <tr><td>O</td><td>-1.48678</td><td>-0.15845</td><td>1.60434</td></tr> <tr><td>C</td><td>-0.44429</td><td>-0.23342</td><td>-0.54651</td></tr> <tr><td>C</td><td>-2.39237</td><td>1.91380</td><td>-1.14253</td></tr> <tr><td>C</td><td>-1.64832</td><td>2.98863</td><td>-0.46507</td></tr> <tr><td>O</td><td>-3.45325</td><td>1.44839</td><td>-0.71541</td></tr> <tr><td>C</td><td>-2.06013</td><td>3.45145</td><td>0.79552</td></tr> <tr><td>C</td><td>-0.55210</td><td>3.59017</td><td>-1.10235</td></tr> <tr><td>C</td><td>-1.37701</td><td>4.49668</td><td>1.40989</td></tr> <tr><td>C</td><td>0.12864</td><td>4.63872</td><td>-0.48676</td></tr> <tr><td>C</td><td>-0.28273</td><td>5.09135</td><td>0.77023</td></tr> <tr><td>H</td><td>-1.24682</td><td>-0.82714</td><td>-0.97159</td></tr> <tr><td>O</td><td>0.59300</td><td>0.72260</td><td>1.30548</td></tr> <tr><td>C</td><td>0.55961</td><td>1.06838</td><td>2.68691</td></tr> <tr><td>C</td><td>0.53342</td><td>-0.13901</td><td>-2.87094</td></tr> </table> | C        | 6.79119  | 0.11935 | 0.18681 | O | 5.97547 | 0.98698 | -0.09495 | O | 6.52475 | -1.18292 | 0.21205 | C | 3.13819 | -2.72580 | -0.57192 | C | 1.87415 | -2.30773 | -0.91466 | N | 3.95190 | -1.61615 | -0.44031 | C | 3.18500 | -0.56496 | -0.70179 | N | 1.91851 | -0.93016 | -0.99531 | C | 8.23210 | 0.41592 | 0.54888 | C | 3.64665 | -4.11655 | -0.35072 | C | 0.78849 | -0.00856 | -1.36237 | C | -0.52072 | 0.07306 | 0.80331 | O | -1.48678 | -0.15845 | 1.60434 | C | -0.44429 | -0.23342 | -0.54651 | C | -2.39237 | 1.91380 | -1.14253 | C | -1.64832 | 2.98863 | -0.46507 | O | -3.45325 | 1.44839 | -0.71541 | C | -2.06013 | 3.45145 | 0.79552 | C | -0.55210 | 3.59017 | -1.10235 | C | -1.37701 | 4.49668 | 1.40989 | C | 0.12864 | 4.63872 | -0.48676 | C | -0.28273 | 5.09135 | 0.77023 | H | -1.24682 | -0.82714 | -0.97159 | O | 0.59300 | 0.72260 | 1.30548 | C | 0.55961 | 1.06838 | 2.68691 | C | 0.53342 | -0.13901 | -2.87094 |
| C                                              | 6.79119                                                                                                                                                                                                                                                                                                                                                                                                                                                                                                                                                                                                                                                                                                                                                                                                                                                                                                                                                                                                                                                                                                                                                                                                                                                                                                                                                                                                                                                                                                                                                                                                                                                                                                                                                                                                                                                                                                                                                                   | 0.11935  | 0.18681  |         |         |   |         |         |          |   |         |          |         |   |         |          |          |   |         |          |          |   |         |          |          |   |         |          |          |   |         |          |          |   |         |         |         |   |         |          |          |   |         |          |          |   |          |         |         |   |          |          |         |   |          |          |          |   |          |         |          |   |          |         |          |   |          |         |          |   |          |         |         |   |          |         |          |   |          |         |         |   |         |         |          |   |          |         |         |   |          |          |          |   |         |         |         |   |         |         |         |   |         |          |          |
| O                                              | 5.97547                                                                                                                                                                                                                                                                                                                                                                                                                                                                                                                                                                                                                                                                                                                                                                                                                                                                                                                                                                                                                                                                                                                                                                                                                                                                                                                                                                                                                                                                                                                                                                                                                                                                                                                                                                                                                                                                                                                                                                   | 0.98698  | -0.09495 |         |         |   |         |         |          |   |         |          |         |   |         |          |          |   |         |          |          |   |         |          |          |   |         |          |          |   |         |          |          |   |         |         |         |   |         |          |          |   |         |          |          |   |          |         |         |   |          |          |         |   |          |          |          |   |          |         |          |   |          |         |          |   |          |         |          |   |          |         |         |   |          |         |          |   |          |         |         |   |         |         |          |   |          |         |         |   |          |          |          |   |         |         |         |   |         |         |         |   |         |          |          |
| O                                              | 6.52475                                                                                                                                                                                                                                                                                                                                                                                                                                                                                                                                                                                                                                                                                                                                                                                                                                                                                                                                                                                                                                                                                                                                                                                                                                                                                                                                                                                                                                                                                                                                                                                                                                                                                                                                                                                                                                                                                                                                                                   | -1.18292 | 0.21205  |         |         |   |         |         |          |   |         |          |         |   |         |          |          |   |         |          |          |   |         |          |          |   |         |          |          |   |         |          |          |   |         |         |         |   |         |          |          |   |         |          |          |   |          |         |         |   |          |          |         |   |          |          |          |   |          |         |          |   |          |         |          |   |          |         |          |   |          |         |         |   |          |         |          |   |          |         |         |   |         |         |          |   |          |         |         |   |          |          |          |   |         |         |         |   |         |         |         |   |         |          |          |
| C                                              | 3.13819                                                                                                                                                                                                                                                                                                                                                                                                                                                                                                                                                                                                                                                                                                                                                                                                                                                                                                                                                                                                                                                                                                                                                                                                                                                                                                                                                                                                                                                                                                                                                                                                                                                                                                                                                                                                                                                                                                                                                                   | -2.72580 | -0.57192 |         |         |   |         |         |          |   |         |          |         |   |         |          |          |   |         |          |          |   |         |          |          |   |         |          |          |   |         |          |          |   |         |         |         |   |         |          |          |   |         |          |          |   |          |         |         |   |          |          |         |   |          |          |          |   |          |         |          |   |          |         |          |   |          |         |          |   |          |         |         |   |          |         |          |   |          |         |         |   |         |         |          |   |          |         |         |   |          |          |          |   |         |         |         |   |         |         |         |   |         |          |          |
| C                                              | 1.87415                                                                                                                                                                                                                                                                                                                                                                                                                                                                                                                                                                                                                                                                                                                                                                                                                                                                                                                                                                                                                                                                                                                                                                                                                                                                                                                                                                                                                                                                                                                                                                                                                                                                                                                                                                                                                                                                                                                                                                   | -2.30773 | -0.91466 |         |         |   |         |         |          |   |         |          |         |   |         |          |          |   |         |          |          |   |         |          |          |   |         |          |          |   |         |          |          |   |         |         |         |   |         |          |          |   |         |          |          |   |          |         |         |   |          |          |         |   |          |          |          |   |          |         |          |   |          |         |          |   |          |         |          |   |          |         |         |   |          |         |          |   |          |         |         |   |         |         |          |   |          |         |         |   |          |          |          |   |         |         |         |   |         |         |         |   |         |          |          |
| N                                              | 3.95190                                                                                                                                                                                                                                                                                                                                                                                                                                                                                                                                                                                                                                                                                                                                                                                                                                                                                                                                                                                                                                                                                                                                                                                                                                                                                                                                                                                                                                                                                                                                                                                                                                                                                                                                                                                                                                                                                                                                                                   | -1.61615 | -0.44031 |         |         |   |         |         |          |   |         |          |         |   |         |          |          |   |         |          |          |   |         |          |          |   |         |          |          |   |         |          |          |   |         |         |         |   |         |          |          |   |         |          |          |   |          |         |         |   |          |          |         |   |          |          |          |   |          |         |          |   |          |         |          |   |          |         |          |   |          |         |         |   |          |         |          |   |          |         |         |   |         |         |          |   |          |         |         |   |          |          |          |   |         |         |         |   |         |         |         |   |         |          |          |
| C                                              | 3.18500                                                                                                                                                                                                                                                                                                                                                                                                                                                                                                                                                                                                                                                                                                                                                                                                                                                                                                                                                                                                                                                                                                                                                                                                                                                                                                                                                                                                                                                                                                                                                                                                                                                                                                                                                                                                                                                                                                                                                                   | -0.56496 | -0.70179 |         |         |   |         |         |          |   |         |          |         |   |         |          |          |   |         |          |          |   |         |          |          |   |         |          |          |   |         |          |          |   |         |         |         |   |         |          |          |   |         |          |          |   |          |         |         |   |          |          |         |   |          |          |          |   |          |         |          |   |          |         |          |   |          |         |          |   |          |         |         |   |          |         |          |   |          |         |         |   |         |         |          |   |          |         |         |   |          |          |          |   |         |         |         |   |         |         |         |   |         |          |          |
| N                                              | 1.91851                                                                                                                                                                                                                                                                                                                                                                                                                                                                                                                                                                                                                                                                                                                                                                                                                                                                                                                                                                                                                                                                                                                                                                                                                                                                                                                                                                                                                                                                                                                                                                                                                                                                                                                                                                                                                                                                                                                                                                   | -0.93016 | -0.99531 |         |         |   |         |         |          |   |         |          |         |   |         |          |          |   |         |          |          |   |         |          |          |   |         |          |          |   |         |          |          |   |         |         |         |   |         |          |          |   |         |          |          |   |          |         |         |   |          |          |         |   |          |          |          |   |          |         |          |   |          |         |          |   |          |         |          |   |          |         |         |   |          |         |          |   |          |         |         |   |         |         |          |   |          |         |         |   |          |          |          |   |         |         |         |   |         |         |         |   |         |          |          |
| C                                              | 8.23210                                                                                                                                                                                                                                                                                                                                                                                                                                                                                                                                                                                                                                                                                                                                                                                                                                                                                                                                                                                                                                                                                                                                                                                                                                                                                                                                                                                                                                                                                                                                                                                                                                                                                                                                                                                                                                                                                                                                                                   | 0.41592  | 0.54888  |         |         |   |         |         |          |   |         |          |         |   |         |          |          |   |         |          |          |   |         |          |          |   |         |          |          |   |         |          |          |   |         |         |         |   |         |          |          |   |         |          |          |   |          |         |         |   |          |          |         |   |          |          |          |   |          |         |          |   |          |         |          |   |          |         |          |   |          |         |         |   |          |         |          |   |          |         |         |   |         |         |          |   |          |         |         |   |          |          |          |   |         |         |         |   |         |         |         |   |         |          |          |
| C                                              | 3.64665                                                                                                                                                                                                                                                                                                                                                                                                                                                                                                                                                                                                                                                                                                                                                                                                                                                                                                                                                                                                                                                                                                                                                                                                                                                                                                                                                                                                                                                                                                                                                                                                                                                                                                                                                                                                                                                                                                                                                                   | -4.11655 | -0.35072 |         |         |   |         |         |          |   |         |          |         |   |         |          |          |   |         |          |          |   |         |          |          |   |         |          |          |   |         |          |          |   |         |         |         |   |         |          |          |   |         |          |          |   |          |         |         |   |          |          |         |   |          |          |          |   |          |         |          |   |          |         |          |   |          |         |          |   |          |         |         |   |          |         |          |   |          |         |         |   |         |         |          |   |          |         |         |   |          |          |          |   |         |         |         |   |         |         |         |   |         |          |          |
| C                                              | 0.78849                                                                                                                                                                                                                                                                                                                                                                                                                                                                                                                                                                                                                                                                                                                                                                                                                                                                                                                                                                                                                                                                                                                                                                                                                                                                                                                                                                                                                                                                                                                                                                                                                                                                                                                                                                                                                                                                                                                                                                   | -0.00856 | -1.36237 |         |         |   |         |         |          |   |         |          |         |   |         |          |          |   |         |          |          |   |         |          |          |   |         |          |          |   |         |          |          |   |         |         |         |   |         |          |          |   |         |          |          |   |          |         |         |   |          |          |         |   |          |          |          |   |          |         |          |   |          |         |          |   |          |         |          |   |          |         |         |   |          |         |          |   |          |         |         |   |         |         |          |   |          |         |         |   |          |          |          |   |         |         |         |   |         |         |         |   |         |          |          |
| C                                              | -0.52072                                                                                                                                                                                                                                                                                                                                                                                                                                                                                                                                                                                                                                                                                                                                                                                                                                                                                                                                                                                                                                                                                                                                                                                                                                                                                                                                                                                                                                                                                                                                                                                                                                                                                                                                                                                                                                                                                                                                                                  | 0.07306  | 0.80331  |         |         |   |         |         |          |   |         |          |         |   |         |          |          |   |         |          |          |   |         |          |          |   |         |          |          |   |         |          |          |   |         |         |         |   |         |          |          |   |         |          |          |   |          |         |         |   |          |          |         |   |          |          |          |   |          |         |          |   |          |         |          |   |          |         |          |   |          |         |         |   |          |         |          |   |          |         |         |   |         |         |          |   |          |         |         |   |          |          |          |   |         |         |         |   |         |         |         |   |         |          |          |
| O                                              | -1.48678                                                                                                                                                                                                                                                                                                                                                                                                                                                                                                                                                                                                                                                                                                                                                                                                                                                                                                                                                                                                                                                                                                                                                                                                                                                                                                                                                                                                                                                                                                                                                                                                                                                                                                                                                                                                                                                                                                                                                                  | -0.15845 | 1.60434  |         |         |   |         |         |          |   |         |          |         |   |         |          |          |   |         |          |          |   |         |          |          |   |         |          |          |   |         |          |          |   |         |         |         |   |         |          |          |   |         |          |          |   |          |         |         |   |          |          |         |   |          |          |          |   |          |         |          |   |          |         |          |   |          |         |          |   |          |         |         |   |          |         |          |   |          |         |         |   |         |         |          |   |          |         |         |   |          |          |          |   |         |         |         |   |         |         |         |   |         |          |          |
| C                                              | -0.44429                                                                                                                                                                                                                                                                                                                                                                                                                                                                                                                                                                                                                                                                                                                                                                                                                                                                                                                                                                                                                                                                                                                                                                                                                                                                                                                                                                                                                                                                                                                                                                                                                                                                                                                                                                                                                                                                                                                                                                  | -0.23342 | -0.54651 |         |         |   |         |         |          |   |         |          |         |   |         |          |          |   |         |          |          |   |         |          |          |   |         |          |          |   |         |          |          |   |         |         |         |   |         |          |          |   |         |          |          |   |          |         |         |   |          |          |         |   |          |          |          |   |          |         |          |   |          |         |          |   |          |         |          |   |          |         |         |   |          |         |          |   |          |         |         |   |         |         |          |   |          |         |         |   |          |          |          |   |         |         |         |   |         |         |         |   |         |          |          |
| C                                              | -2.39237                                                                                                                                                                                                                                                                                                                                                                                                                                                                                                                                                                                                                                                                                                                                                                                                                                                                                                                                                                                                                                                                                                                                                                                                                                                                                                                                                                                                                                                                                                                                                                                                                                                                                                                                                                                                                                                                                                                                                                  | 1.91380  | -1.14253 |         |         |   |         |         |          |   |         |          |         |   |         |          |          |   |         |          |          |   |         |          |          |   |         |          |          |   |         |          |          |   |         |         |         |   |         |          |          |   |         |          |          |   |          |         |         |   |          |          |         |   |          |          |          |   |          |         |          |   |          |         |          |   |          |         |          |   |          |         |         |   |          |         |          |   |          |         |         |   |         |         |          |   |          |         |         |   |          |          |          |   |         |         |         |   |         |         |         |   |         |          |          |
| C                                              | -1.64832                                                                                                                                                                                                                                                                                                                                                                                                                                                                                                                                                                                                                                                                                                                                                                                                                                                                                                                                                                                                                                                                                                                                                                                                                                                                                                                                                                                                                                                                                                                                                                                                                                                                                                                                                                                                                                                                                                                                                                  | 2.98863  | -0.46507 |         |         |   |         |         |          |   |         |          |         |   |         |          |          |   |         |          |          |   |         |          |          |   |         |          |          |   |         |          |          |   |         |         |         |   |         |          |          |   |         |          |          |   |          |         |         |   |          |          |         |   |          |          |          |   |          |         |          |   |          |         |          |   |          |         |          |   |          |         |         |   |          |         |          |   |          |         |         |   |         |         |          |   |          |         |         |   |          |          |          |   |         |         |         |   |         |         |         |   |         |          |          |
| O                                              | -3.45325                                                                                                                                                                                                                                                                                                                                                                                                                                                                                                                                                                                                                                                                                                                                                                                                                                                                                                                                                                                                                                                                                                                                                                                                                                                                                                                                                                                                                                                                                                                                                                                                                                                                                                                                                                                                                                                                                                                                                                  | 1.44839  | -0.71541 |         |         |   |         |         |          |   |         |          |         |   |         |          |          |   |         |          |          |   |         |          |          |   |         |          |          |   |         |          |          |   |         |         |         |   |         |          |          |   |         |          |          |   |          |         |         |   |          |          |         |   |          |          |          |   |          |         |          |   |          |         |          |   |          |         |          |   |          |         |         |   |          |         |          |   |          |         |         |   |         |         |          |   |          |         |         |   |          |          |          |   |         |         |         |   |         |         |         |   |         |          |          |
| C                                              | -2.06013                                                                                                                                                                                                                                                                                                                                                                                                                                                                                                                                                                                                                                                                                                                                                                                                                                                                                                                                                                                                                                                                                                                                                                                                                                                                                                                                                                                                                                                                                                                                                                                                                                                                                                                                                                                                                                                                                                                                                                  | 3.45145  | 0.79552  |         |         |   |         |         |          |   |         |          |         |   |         |          |          |   |         |          |          |   |         |          |          |   |         |          |          |   |         |          |          |   |         |         |         |   |         |          |          |   |         |          |          |   |          |         |         |   |          |          |         |   |          |          |          |   |          |         |          |   |          |         |          |   |          |         |          |   |          |         |         |   |          |         |          |   |          |         |         |   |         |         |          |   |          |         |         |   |          |          |          |   |         |         |         |   |         |         |         |   |         |          |          |
| C                                              | -0.55210                                                                                                                                                                                                                                                                                                                                                                                                                                                                                                                                                                                                                                                                                                                                                                                                                                                                                                                                                                                                                                                                                                                                                                                                                                                                                                                                                                                                                                                                                                                                                                                                                                                                                                                                                                                                                                                                                                                                                                  | 3.59017  | -1.10235 |         |         |   |         |         |          |   |         |          |         |   |         |          |          |   |         |          |          |   |         |          |          |   |         |          |          |   |         |          |          |   |         |         |         |   |         |          |          |   |         |          |          |   |          |         |         |   |          |          |         |   |          |          |          |   |          |         |          |   |          |         |          |   |          |         |          |   |          |         |         |   |          |         |          |   |          |         |         |   |         |         |          |   |          |         |         |   |          |          |          |   |         |         |         |   |         |         |         |   |         |          |          |
| C                                              | -1.37701                                                                                                                                                                                                                                                                                                                                                                                                                                                                                                                                                                                                                                                                                                                                                                                                                                                                                                                                                                                                                                                                                                                                                                                                                                                                                                                                                                                                                                                                                                                                                                                                                                                                                                                                                                                                                                                                                                                                                                  | 4.49668  | 1.40989  |         |         |   |         |         |          |   |         |          |         |   |         |          |          |   |         |          |          |   |         |          |          |   |         |          |          |   |         |          |          |   |         |         |         |   |         |          |          |   |         |          |          |   |          |         |         |   |          |          |         |   |          |          |          |   |          |         |          |   |          |         |          |   |          |         |          |   |          |         |         |   |          |         |          |   |          |         |         |   |         |         |          |   |          |         |         |   |          |          |          |   |         |         |         |   |         |         |         |   |         |          |          |
| C                                              | 0.12864                                                                                                                                                                                                                                                                                                                                                                                                                                                                                                                                                                                                                                                                                                                                                                                                                                                                                                                                                                                                                                                                                                                                                                                                                                                                                                                                                                                                                                                                                                                                                                                                                                                                                                                                                                                                                                                                                                                                                                   | 4.63872  | -0.48676 |         |         |   |         |         |          |   |         |          |         |   |         |          |          |   |         |          |          |   |         |          |          |   |         |          |          |   |         |          |          |   |         |         |         |   |         |          |          |   |         |          |          |   |          |         |         |   |          |          |         |   |          |          |          |   |          |         |          |   |          |         |          |   |          |         |          |   |          |         |         |   |          |         |          |   |          |         |         |   |         |         |          |   |          |         |         |   |          |          |          |   |         |         |         |   |         |         |         |   |         |          |          |
| C                                              | -0.28273                                                                                                                                                                                                                                                                                                                                                                                                                                                                                                                                                                                                                                                                                                                                                                                                                                                                                                                                                                                                                                                                                                                                                                                                                                                                                                                                                                                                                                                                                                                                                                                                                                                                                                                                                                                                                                                                                                                                                                  | 5.09135  | 0.77023  |         |         |   |         |         |          |   |         |          |         |   |         |          |          |   |         |          |          |   |         |          |          |   |         |          |          |   |         |          |          |   |         |         |         |   |         |          |          |   |         |          |          |   |          |         |         |   |          |          |         |   |          |          |          |   |          |         |          |   |          |         |          |   |          |         |          |   |          |         |         |   |          |         |          |   |          |         |         |   |         |         |          |   |          |         |         |   |          |          |          |   |         |         |         |   |         |         |         |   |         |          |          |
| H                                              | -1.24682                                                                                                                                                                                                                                                                                                                                                                                                                                                                                                                                                                                                                                                                                                                                                                                                                                                                                                                                                                                                                                                                                                                                                                                                                                                                                                                                                                                                                                                                                                                                                                                                                                                                                                                                                                                                                                                                                                                                                                  | -0.82714 | -0.97159 |         |         |   |         |         |          |   |         |          |         |   |         |          |          |   |         |          |          |   |         |          |          |   |         |          |          |   |         |          |          |   |         |         |         |   |         |          |          |   |         |          |          |   |          |         |         |   |          |          |         |   |          |          |          |   |          |         |          |   |          |         |          |   |          |         |          |   |          |         |         |   |          |         |          |   |          |         |         |   |         |         |          |   |          |         |         |   |          |          |          |   |         |         |         |   |         |         |         |   |         |          |          |
| O                                              | 0.59300                                                                                                                                                                                                                                                                                                                                                                                                                                                                                                                                                                                                                                                                                                                                                                                                                                                                                                                                                                                                                                                                                                                                                                                                                                                                                                                                                                                                                                                                                                                                                                                                                                                                                                                                                                                                                                                                                                                                                                   | 0.72260  | 1.30548  |         |         |   |         |         |          |   |         |          |         |   |         |          |          |   |         |          |          |   |         |          |          |   |         |          |          |   |         |          |          |   |         |         |         |   |         |          |          |   |         |          |          |   |          |         |         |   |          |          |         |   |          |          |          |   |          |         |          |   |          |         |          |   |          |         |          |   |          |         |         |   |          |         |          |   |          |         |         |   |         |         |          |   |          |         |         |   |          |          |          |   |         |         |         |   |         |         |         |   |         |          |          |
| C                                              | 0.55961                                                                                                                                                                                                                                                                                                                                                                                                                                                                                                                                                                                                                                                                                                                                                                                                                                                                                                                                                                                                                                                                                                                                                                                                                                                                                                                                                                                                                                                                                                                                                                                                                                                                                                                                                                                                                                                                                                                                                                   | 1.06838  | 2.68691  |         |         |   |         |         |          |   |         |          |         |   |         |          |          |   |         |          |          |   |         |          |          |   |         |          |          |   |         |          |          |   |         |         |         |   |         |          |          |   |         |          |          |   |          |         |         |   |          |          |         |   |          |          |          |   |          |         |          |   |          |         |          |   |          |         |          |   |          |         |         |   |          |         |          |   |          |         |         |   |         |         |          |   |          |         |         |   |          |          |          |   |         |         |         |   |         |         |         |   |         |          |          |
| C                                              | 0.53342                                                                                                                                                                                                                                                                                                                                                                                                                                                                                                                                                                                                                                                                                                                                                                                                                                                                                                                                                                                                                                                                                                                                                                                                                                                                                                                                                                                                                                                                                                                                                                                                                                                                                                                                                                                                                                                                                                                                                                   | -0.13901 | -2.87094 |         |         |   |         |         |          |   |         |          |         |   |         |          |          |   |         |          |          |   |         |          |          |   |         |          |          |   |         |          |          |   |         |         |         |   |         |          |          |   |         |          |          |   |          |         |         |   |          |          |         |   |          |          |          |   |          |         |          |   |          |         |          |   |          |         |          |   |          |         |         |   |          |         |          |   |          |         |         |   |         |         |          |   |          |         |         |   |          |          |          |   |         |         |         |   |         |         |         |   |         |          |          |

|   |          |          |          |
|---|----------|----------|----------|
| N | -3.80296 | -1.36897 | 0.73753  |
| N | -2.52619 | -2.70005 | 2.11006  |
| H | 0.97659  | 5.10233  | -0.98263 |
| H | 0.24787  | 5.90831  | 1.25162  |
| H | -1.69442 | 4.85378  | 2.38578  |
| H | -2.91121 | 2.97773  | 1.27344  |
| H | -0.23967 | 3.23569  | -2.08190 |
| H | -0.18789 | 0.61668  | -3.19884 |
| H | 0.11954  | -1.12462 | -3.11382 |
| H | 1.45793  | -0.00592 | -3.44238 |
| H | -2.00459 | 1.61261  | -2.12921 |
| H | 1.20564  | 0.98406  | -1.15673 |
| H | 0.96022  | -2.85545 | -1.08717 |
| H | 4.46096  | -4.36123 | -1.04407 |
| H | 4.03974  | -4.24295 | 0.66573  |
| H | 2.84790  | -4.85040 | -0.49746 |
| H | 3.52401  | 0.46068  | -0.67411 |
| H | -3.07148 | -0.65541 | 0.90442  |
| H | -1.89009 | -1.88991 | 2.14104  |
| H | 8.41243  | 1.49141  | 0.51889  |
| H | 1.50852  | 1.57183  | 2.88624  |
| H | -0.27180 | 1.74164  | 2.91566  |
| H | 8.45315  | 0.03135  | 1.55028  |
| H | 0.47548  | 0.18007  | 3.32290  |
| H | 8.90576  | -0.09183 | -0.14968 |
| O | -5.29044 | -0.43067 | -1.49602 |
| H | -4.58942 | 0.26040  | -1.43745 |
| C | -6.54619 | 0.22475  | -1.33569 |
| H | -7.32122 | -0.54660 | -1.32288 |
| H | -6.75257 | 0.90868  | -2.17014 |
| H | -6.59966 | 0.79203  | -0.39654 |
| H | 5.54161  | -1.35042 | -0.03687 |
| H | -4.51234 | -1.19329 | 0.01884  |
| H | -2.12461 | -3.61611 | 2.25458  |
| C | -3.54494 | -2.57211 | 1.23097  |
| N | -4.28484 | -3.65098 | 0.90637  |
| H | -4.16251 | -4.47157 | 1.48326  |
| C | -5.48740 | -3.58934 | 0.08203  |
| H | -5.77453 | -4.60989 | -0.17486 |
| H | -5.28640 | -3.04305 | -0.84276 |
| H | -6.32056 | -3.10553 | 0.60683  |

Optimized Molecular Properties for TArg-TS2

|                                                |                                                                                                                                                                                                                                                                                                                                                                                                                                                                                                                                                                                                                                                                                                                                                                                                                                                                                 |  |  |
|------------------------------------------------|---------------------------------------------------------------------------------------------------------------------------------------------------------------------------------------------------------------------------------------------------------------------------------------------------------------------------------------------------------------------------------------------------------------------------------------------------------------------------------------------------------------------------------------------------------------------------------------------------------------------------------------------------------------------------------------------------------------------------------------------------------------------------------------------------------------------------------------------------------------------------------|--|--|
| Number of<br>(-)<br>Vibrational<br>Frequencies | 1 (-130.1561)                                                                                                                                                                                                                                                                                                                                                                                                                                                                                                                                                                                                                                                                                                                                                                                                                                                                   |  |  |
| Absolute<br>Energies<br>(Hartrees)             | <b>B3LYP/6-31G(d) (PCM)</b><br>There are 20 positive frequencies below 100 cm <sup>-1</sup> .<br>Zero-point correction: 0.560791 hartree<br>Enthalpy correction: 0.601910 hartree<br>Free Energy correction: 0.480874 hartree<br>Quasiharmonic Free Energy correction: 0.497583 hartree<br><br>SCF Energy: -1546.445654 hartree<br>SCF Energy + ZPVE: -1545.884863 hartree<br>Enthalpy: -1545.843744 hartree<br>Free Energy: -1545.964780 hartree<br><br>Free Energy with quasiharmonic correction: -1545.948071 hartree<br>(correction: 10.49 kcal/mol)<br><br><b>B3LYP-D3/6-311+G(d,p) (PCM)</b><br>SCF Done: E(RB3LYP) = -1546.99834953 A.U.                                                                                                                                                                                                                                 |  |  |
| Cartesian<br>Coordinates                       | (PCM)<br>67<br>spD3-TS2-Targ.out Energy: -970756.1128574<br>C -6.58254 -0.15921 -0.34375<br>O -5.82960 0.76869 -0.08095<br>O -6.24357 -1.44371 -0.27375<br>C -2.82458 -2.72744 0.80981<br>C -1.60797 -2.21521 1.19151<br>N -3.68022 -1.67824 0.53023<br>C -2.98627 -0.56870 0.74185<br>N -1.72467 -0.83788 1.14593<br>C -8.01778 0.02968 -0.78913<br>C -3.25182 -4.15684 0.68589<br>C -0.66961 0.16502 1.48093<br>C 0.46551 0.07816 -0.79202<br>O 1.34338 -0.28001 -1.61286<br>C 0.56675 0.01956 0.62590<br>C 2.02178 1.70335 0.93041<br>C 1.26114 2.85330 0.35607<br>O 3.11133 1.33301 0.40491<br>C 1.54049 3.30071 -0.94397<br>C 0.30589 3.53889 1.12004<br>C 0.86260 4.39674 -1.47429<br>C -0.37238 4.63783 0.59033<br>C -0.09814 5.06792 -0.71020<br>H 1.31162 -0.68607 0.98430<br>O -0.67768 0.66787 -1.24619<br>C -0.79627 0.82938 -2.66305<br>C -0.37153 0.06995 2.98401 |  |  |

|   |          |          |          |
|---|----------|----------|----------|
| N | 3.87899  | -1.25814 | -0.79842 |
| N | 2.67256  | -2.74290 | -2.08491 |
| H | -1.10844 | 5.16224  | 1.19415  |
| H | -0.62328 | 5.92510  | -1.12324 |
| H | 1.08674  | 4.73559  | -2.48283 |
| H | 2.29611  | 2.77584  | -1.51940 |
| H | 0.10457  | 3.22034  | 2.14073  |
| H | 0.29551  | 0.87785  | 3.29836  |
| H | 0.11615  | -0.88033 | 3.22934  |
| H | -1.29530 | 0.14179  | 3.56675  |
| H | 1.86897  | 1.56848  | 2.01260  |
| H | -1.14927 | 1.12720  | 1.27191  |
| H | -0.68806 | -2.70040 | 1.48080  |
| H | -4.09847 | -4.37999 | 1.34670  |
| H | -3.57042 | -4.39195 | -0.33718 |
| H | -2.43201 | -4.83261 | 0.94872  |
| H | -3.37096 | 0.43108  | 0.60149  |
| H | 3.11483  | -0.58620 | -0.94239 |
| H | 1.95322  | -2.01539 | -2.12090 |
| H | -8.25823 | 1.09253  | -0.83727 |
| H | -1.76754 | 1.30017  | -2.82190 |
| H | -0.00014 | 1.46824  | -3.05338 |
| H | -8.16798 | -0.42893 | -1.77233 |
| H | -0.76116 | -0.13796 | -3.17322 |
| H | -8.69557 | -0.47182 | -0.09008 |
| O | 5.12625  | -0.07972 | 1.42151  |
| H | 4.32685  | 0.48404  | 1.21671  |
| C | 6.27210  | 0.75348  | 1.29479  |
| H | 7.15920  | 0.13182  | 1.45072  |
| H | 6.27656  | 1.55300  | 2.04909  |
| H | 6.34216  | 1.21714  | 0.30043  |
| H | -5.26922 | -1.53559 | 0.03141  |
| H | 4.56427  | -1.01353 | -0.07399 |
| H | 2.37032  | -3.69794 | -2.21578 |
| C | 3.69885  | -2.49385 | -1.24130 |
| N | 4.53581  | -3.49206 | -0.89896 |
| H | 4.45830  | -4.35338 | -1.42129 |
| C | 5.75127  | -3.29083 | -0.11594 |
| H | 6.15724  | -4.27121 | 0.13529  |
| H | 5.52337  | -2.76172 | 0.81304  |
| H | 6.50681  | -2.72353 | -0.67293 |

Optimized Molecular Properties for TArg-Int2-1

|                                                |                                                                                                                                                                                                                                                                                                                                                                                                                                                                                                                                                                                                                                                                                                                                                                                                                                                                                                                                                                                                                                                                                                                                                                                                                                                                                                                                                                                                                                                                                                                                                                                                                                                                                                                                                                                                                                                                                                                                                                                |          |          |         |          |   |          |         |          |   |          |          |          |   |          |          |         |   |          |          |         |   |          |          |          |   |          |          |         |   |          |          |         |   |          |         |          |   |          |          |          |   |          |          |         |   |         |          |          |   |         |          |          |   |         |          |         |   |         |         |         |   |         |         |         |   |         |          |         |   |         |         |         |   |         |         |         |   |         |         |         |   |         |         |          |   |         |         |         |   |         |          |         |   |          |         |          |   |          |         |          |   |          |          |         |
|------------------------------------------------|--------------------------------------------------------------------------------------------------------------------------------------------------------------------------------------------------------------------------------------------------------------------------------------------------------------------------------------------------------------------------------------------------------------------------------------------------------------------------------------------------------------------------------------------------------------------------------------------------------------------------------------------------------------------------------------------------------------------------------------------------------------------------------------------------------------------------------------------------------------------------------------------------------------------------------------------------------------------------------------------------------------------------------------------------------------------------------------------------------------------------------------------------------------------------------------------------------------------------------------------------------------------------------------------------------------------------------------------------------------------------------------------------------------------------------------------------------------------------------------------------------------------------------------------------------------------------------------------------------------------------------------------------------------------------------------------------------------------------------------------------------------------------------------------------------------------------------------------------------------------------------------------------------------------------------------------------------------------------------|----------|----------|---------|----------|---|----------|---------|----------|---|----------|----------|----------|---|----------|----------|---------|---|----------|----------|---------|---|----------|----------|----------|---|----------|----------|---------|---|----------|----------|---------|---|----------|---------|----------|---|----------|----------|----------|---|----------|----------|---------|---|---------|----------|----------|---|---------|----------|----------|---|---------|----------|---------|---|---------|---------|---------|---|---------|---------|---------|---|---------|----------|---------|---|---------|---------|---------|---|---------|---------|---------|---|---------|---------|---------|---|---------|---------|----------|---|---------|---------|---------|---|---------|----------|---------|---|----------|---------|----------|---|----------|---------|----------|---|----------|----------|---------|
| Number of<br>(-)<br>Vibrational<br>Frequencies | 0                                                                                                                                                                                                                                                                                                                                                                                                                                                                                                                                                                                                                                                                                                                                                                                                                                                                                                                                                                                                                                                                                                                                                                                                                                                                                                                                                                                                                                                                                                                                                                                                                                                                                                                                                                                                                                                                                                                                                                              |          |          |         |          |   |          |         |          |   |          |          |          |   |          |          |         |   |          |          |         |   |          |          |          |   |          |          |         |   |          |          |         |   |          |         |          |   |          |          |          |   |          |          |         |   |         |          |          |   |         |          |          |   |         |          |         |   |         |         |         |   |         |         |         |   |         |          |         |   |         |         |         |   |         |         |         |   |         |         |         |   |         |         |          |   |         |         |         |   |         |          |         |   |          |         |          |   |          |         |          |   |          |          |         |
| Absolute<br>Energies<br>(Hartrees)             | <p><b>B3LYP/6-31G(d) (PCM)</b></p> <p>There are 18 positive frequencies below 100 cm<sup>-1</sup>.</p> <p>Zero-point correction: 0.563626 hartree<br/>         Enthalpy correction: 0.603314 hartree<br/>         Free Energy correction: 0.485202 hartree<br/>         Quasiharmonic Free Energy correction: 0.498997 hartree</p> <p>SCF Energy: -1546.461078 hartree<br/>         SCF Energy + ZPVE: -1545.897452 hartree<br/>         Enthalpy: -1545.857764 hartree<br/>         Free Energy: -1545.975876 hartree</p> <p>Free Energy with quasiharmonic correction: -1545.962081 hartree<br/>         (correction: 8.66 kcal/mol)</p> <p><b>B3LYP-D3/6-311+G(d,p) (PCM)</b></p> <p>SCF Done: E(RB3LYP) = -1547.01835635 A.U.</p>                                                                                                                                                                                                                                                                                                                                                                                                                                                                                                                                                                                                                                                                                                                                                                                                                                                                                                                                                                                                                                                                                                                                                                                                                                          |          |          |         |          |   |          |         |          |   |          |          |          |   |          |          |         |   |          |          |         |   |          |          |          |   |          |          |         |   |          |          |         |   |          |         |          |   |          |          |          |   |          |          |         |   |         |          |          |   |         |          |          |   |         |          |         |   |         |         |         |   |         |         |         |   |         |          |         |   |         |         |         |   |         |         |         |   |         |         |         |   |         |         |          |   |         |         |         |   |         |          |         |   |          |         |          |   |          |         |          |   |          |          |         |
| Cartesian<br>Coordinates                       | <p>(PCM)</p> <p>67</p> <p>spD3-R-TS3-meoh-Targ.out Energy: -970768.6673264</p> <table> <tr><td>C</td><td>-6.42871</td><td>1.15177</td><td>-1.01980</td></tr> <tr><td>O</td><td>-5.51655</td><td>1.81452</td><td>-0.54471</td></tr> <tr><td>O</td><td>-6.43069</td><td>-0.17695</td><td>-1.09363</td></tr> <tr><td>C</td><td>-3.58838</td><td>-2.40511</td><td>0.16921</td></tr> <tr><td>C</td><td>-2.36622</td><td>-2.25820</td><td>0.77794</td></tr> <tr><td>N</td><td>-4.13999</td><td>-1.15280</td><td>-0.03196</td></tr> <tr><td>C</td><td>-3.26700</td><td>-0.28044</td><td>0.44460</td></tr> <tr><td>N</td><td>-2.17006</td><td>-0.89645</td><td>0.94763</td></tr> <tr><td>C</td><td>-7.69222</td><td>1.75764</td><td>-1.59335</td></tr> <tr><td>C</td><td>-4.29007</td><td>-3.65979</td><td>-0.24669</td></tr> <tr><td>C</td><td>-1.01334</td><td>-0.23366</td><td>1.58420</td></tr> <tr><td>C</td><td>0.17028</td><td>-0.31949</td><td>-0.68123</td></tr> <tr><td>O</td><td>0.73766</td><td>-0.97589</td><td>-1.53760</td></tr> <tr><td>C</td><td>0.28621</td><td>-0.56014</td><td>0.81090</td></tr> <tr><td>C</td><td>1.61020</td><td>0.14988</td><td>1.36094</td></tr> <tr><td>C</td><td>1.59089</td><td>1.67074</td><td>1.16548</td></tr> <tr><td>O</td><td>2.70893</td><td>-0.46154</td><td>0.79881</td></tr> <tr><td>C</td><td>1.04630</td><td>2.52032</td><td>2.13804</td></tr> <tr><td>C</td><td>2.14310</td><td>2.25270</td><td>0.01589</td></tr> <tr><td>C</td><td>1.03046</td><td>3.90652</td><td>1.96145</td></tr> <tr><td>C</td><td>2.13083</td><td>3.63589</td><td>-0.16675</td></tr> <tr><td>C</td><td>1.57080</td><td>4.47021</td><td>0.80466</td></tr> <tr><td>H</td><td>0.51209</td><td>-1.62322</td><td>0.93556</td></tr> <tr><td>O</td><td>-0.59885</td><td>0.74828</td><td>-0.97645</td></tr> <tr><td>C</td><td>-0.72397</td><td>1.07632</td><td>-2.37068</td></tr> <tr><td>C</td><td>-0.96096</td><td>-0.63840</td><td>3.06498</td></tr> </table> | C        | -6.42871 | 1.15177 | -1.01980 | O | -5.51655 | 1.81452 | -0.54471 | O | -6.43069 | -0.17695 | -1.09363 | C | -3.58838 | -2.40511 | 0.16921 | C | -2.36622 | -2.25820 | 0.77794 | N | -4.13999 | -1.15280 | -0.03196 | C | -3.26700 | -0.28044 | 0.44460 | N | -2.17006 | -0.89645 | 0.94763 | C | -7.69222 | 1.75764 | -1.59335 | C | -4.29007 | -3.65979 | -0.24669 | C | -1.01334 | -0.23366 | 1.58420 | C | 0.17028 | -0.31949 | -0.68123 | O | 0.73766 | -0.97589 | -1.53760 | C | 0.28621 | -0.56014 | 0.81090 | C | 1.61020 | 0.14988 | 1.36094 | C | 1.59089 | 1.67074 | 1.16548 | O | 2.70893 | -0.46154 | 0.79881 | C | 1.04630 | 2.52032 | 2.13804 | C | 2.14310 | 2.25270 | 0.01589 | C | 1.03046 | 3.90652 | 1.96145 | C | 2.13083 | 3.63589 | -0.16675 | C | 1.57080 | 4.47021 | 0.80466 | H | 0.51209 | -1.62322 | 0.93556 | O | -0.59885 | 0.74828 | -0.97645 | C | -0.72397 | 1.07632 | -2.37068 | C | -0.96096 | -0.63840 | 3.06498 |
| C                                              | -6.42871                                                                                                                                                                                                                                                                                                                                                                                                                                                                                                                                                                                                                                                                                                                                                                                                                                                                                                                                                                                                                                                                                                                                                                                                                                                                                                                                                                                                                                                                                                                                                                                                                                                                                                                                                                                                                                                                                                                                                                       | 1.15177  | -1.01980 |         |          |   |          |         |          |   |          |          |          |   |          |          |         |   |          |          |         |   |          |          |          |   |          |          |         |   |          |          |         |   |          |         |          |   |          |          |          |   |          |          |         |   |         |          |          |   |         |          |          |   |         |          |         |   |         |         |         |   |         |         |         |   |         |          |         |   |         |         |         |   |         |         |         |   |         |         |         |   |         |         |          |   |         |         |         |   |         |          |         |   |          |         |          |   |          |         |          |   |          |          |         |
| O                                              | -5.51655                                                                                                                                                                                                                                                                                                                                                                                                                                                                                                                                                                                                                                                                                                                                                                                                                                                                                                                                                                                                                                                                                                                                                                                                                                                                                                                                                                                                                                                                                                                                                                                                                                                                                                                                                                                                                                                                                                                                                                       | 1.81452  | -0.54471 |         |          |   |          |         |          |   |          |          |          |   |          |          |         |   |          |          |         |   |          |          |          |   |          |          |         |   |          |          |         |   |          |         |          |   |          |          |          |   |          |          |         |   |         |          |          |   |         |          |          |   |         |          |         |   |         |         |         |   |         |         |         |   |         |          |         |   |         |         |         |   |         |         |         |   |         |         |         |   |         |         |          |   |         |         |         |   |         |          |         |   |          |         |          |   |          |         |          |   |          |          |         |
| O                                              | -6.43069                                                                                                                                                                                                                                                                                                                                                                                                                                                                                                                                                                                                                                                                                                                                                                                                                                                                                                                                                                                                                                                                                                                                                                                                                                                                                                                                                                                                                                                                                                                                                                                                                                                                                                                                                                                                                                                                                                                                                                       | -0.17695 | -1.09363 |         |          |   |          |         |          |   |          |          |          |   |          |          |         |   |          |          |         |   |          |          |          |   |          |          |         |   |          |          |         |   |          |         |          |   |          |          |          |   |          |          |         |   |         |          |          |   |         |          |          |   |         |          |         |   |         |         |         |   |         |         |         |   |         |          |         |   |         |         |         |   |         |         |         |   |         |         |         |   |         |         |          |   |         |         |         |   |         |          |         |   |          |         |          |   |          |         |          |   |          |          |         |
| C                                              | -3.58838                                                                                                                                                                                                                                                                                                                                                                                                                                                                                                                                                                                                                                                                                                                                                                                                                                                                                                                                                                                                                                                                                                                                                                                                                                                                                                                                                                                                                                                                                                                                                                                                                                                                                                                                                                                                                                                                                                                                                                       | -2.40511 | 0.16921  |         |          |   |          |         |          |   |          |          |          |   |          |          |         |   |          |          |         |   |          |          |          |   |          |          |         |   |          |          |         |   |          |         |          |   |          |          |          |   |          |          |         |   |         |          |          |   |         |          |          |   |         |          |         |   |         |         |         |   |         |         |         |   |         |          |         |   |         |         |         |   |         |         |         |   |         |         |         |   |         |         |          |   |         |         |         |   |         |          |         |   |          |         |          |   |          |         |          |   |          |          |         |
| C                                              | -2.36622                                                                                                                                                                                                                                                                                                                                                                                                                                                                                                                                                                                                                                                                                                                                                                                                                                                                                                                                                                                                                                                                                                                                                                                                                                                                                                                                                                                                                                                                                                                                                                                                                                                                                                                                                                                                                                                                                                                                                                       | -2.25820 | 0.77794  |         |          |   |          |         |          |   |          |          |          |   |          |          |         |   |          |          |         |   |          |          |          |   |          |          |         |   |          |          |         |   |          |         |          |   |          |          |          |   |          |          |         |   |         |          |          |   |         |          |          |   |         |          |         |   |         |         |         |   |         |         |         |   |         |          |         |   |         |         |         |   |         |         |         |   |         |         |         |   |         |         |          |   |         |         |         |   |         |          |         |   |          |         |          |   |          |         |          |   |          |          |         |
| N                                              | -4.13999                                                                                                                                                                                                                                                                                                                                                                                                                                                                                                                                                                                                                                                                                                                                                                                                                                                                                                                                                                                                                                                                                                                                                                                                                                                                                                                                                                                                                                                                                                                                                                                                                                                                                                                                                                                                                                                                                                                                                                       | -1.15280 | -0.03196 |         |          |   |          |         |          |   |          |          |          |   |          |          |         |   |          |          |         |   |          |          |          |   |          |          |         |   |          |          |         |   |          |         |          |   |          |          |          |   |          |          |         |   |         |          |          |   |         |          |          |   |         |          |         |   |         |         |         |   |         |         |         |   |         |          |         |   |         |         |         |   |         |         |         |   |         |         |         |   |         |         |          |   |         |         |         |   |         |          |         |   |          |         |          |   |          |         |          |   |          |          |         |
| C                                              | -3.26700                                                                                                                                                                                                                                                                                                                                                                                                                                                                                                                                                                                                                                                                                                                                                                                                                                                                                                                                                                                                                                                                                                                                                                                                                                                                                                                                                                                                                                                                                                                                                                                                                                                                                                                                                                                                                                                                                                                                                                       | -0.28044 | 0.44460  |         |          |   |          |         |          |   |          |          |          |   |          |          |         |   |          |          |         |   |          |          |          |   |          |          |         |   |          |          |         |   |          |         |          |   |          |          |          |   |          |          |         |   |         |          |          |   |         |          |          |   |         |          |         |   |         |         |         |   |         |         |         |   |         |          |         |   |         |         |         |   |         |         |         |   |         |         |         |   |         |         |          |   |         |         |         |   |         |          |         |   |          |         |          |   |          |         |          |   |          |          |         |
| N                                              | -2.17006                                                                                                                                                                                                                                                                                                                                                                                                                                                                                                                                                                                                                                                                                                                                                                                                                                                                                                                                                                                                                                                                                                                                                                                                                                                                                                                                                                                                                                                                                                                                                                                                                                                                                                                                                                                                                                                                                                                                                                       | -0.89645 | 0.94763  |         |          |   |          |         |          |   |          |          |          |   |          |          |         |   |          |          |         |   |          |          |          |   |          |          |         |   |          |          |         |   |          |         |          |   |          |          |          |   |          |          |         |   |         |          |          |   |         |          |          |   |         |          |         |   |         |         |         |   |         |         |         |   |         |          |         |   |         |         |         |   |         |         |         |   |         |         |         |   |         |         |          |   |         |         |         |   |         |          |         |   |          |         |          |   |          |         |          |   |          |          |         |
| C                                              | -7.69222                                                                                                                                                                                                                                                                                                                                                                                                                                                                                                                                                                                                                                                                                                                                                                                                                                                                                                                                                                                                                                                                                                                                                                                                                                                                                                                                                                                                                                                                                                                                                                                                                                                                                                                                                                                                                                                                                                                                                                       | 1.75764  | -1.59335 |         |          |   |          |         |          |   |          |          |          |   |          |          |         |   |          |          |         |   |          |          |          |   |          |          |         |   |          |          |         |   |          |         |          |   |          |          |          |   |          |          |         |   |         |          |          |   |         |          |          |   |         |          |         |   |         |         |         |   |         |         |         |   |         |          |         |   |         |         |         |   |         |         |         |   |         |         |         |   |         |         |          |   |         |         |         |   |         |          |         |   |          |         |          |   |          |         |          |   |          |          |         |
| C                                              | -4.29007                                                                                                                                                                                                                                                                                                                                                                                                                                                                                                                                                                                                                                                                                                                                                                                                                                                                                                                                                                                                                                                                                                                                                                                                                                                                                                                                                                                                                                                                                                                                                                                                                                                                                                                                                                                                                                                                                                                                                                       | -3.65979 | -0.24669 |         |          |   |          |         |          |   |          |          |          |   |          |          |         |   |          |          |         |   |          |          |          |   |          |          |         |   |          |          |         |   |          |         |          |   |          |          |          |   |          |          |         |   |         |          |          |   |         |          |          |   |         |          |         |   |         |         |         |   |         |         |         |   |         |          |         |   |         |         |         |   |         |         |         |   |         |         |         |   |         |         |          |   |         |         |         |   |         |          |         |   |          |         |          |   |          |         |          |   |          |          |         |
| C                                              | -1.01334                                                                                                                                                                                                                                                                                                                                                                                                                                                                                                                                                                                                                                                                                                                                                                                                                                                                                                                                                                                                                                                                                                                                                                                                                                                                                                                                                                                                                                                                                                                                                                                                                                                                                                                                                                                                                                                                                                                                                                       | -0.23366 | 1.58420  |         |          |   |          |         |          |   |          |          |          |   |          |          |         |   |          |          |         |   |          |          |          |   |          |          |         |   |          |          |         |   |          |         |          |   |          |          |          |   |          |          |         |   |         |          |          |   |         |          |          |   |         |          |         |   |         |         |         |   |         |         |         |   |         |          |         |   |         |         |         |   |         |         |         |   |         |         |         |   |         |         |          |   |         |         |         |   |         |          |         |   |          |         |          |   |          |         |          |   |          |          |         |
| C                                              | 0.17028                                                                                                                                                                                                                                                                                                                                                                                                                                                                                                                                                                                                                                                                                                                                                                                                                                                                                                                                                                                                                                                                                                                                                                                                                                                                                                                                                                                                                                                                                                                                                                                                                                                                                                                                                                                                                                                                                                                                                                        | -0.31949 | -0.68123 |         |          |   |          |         |          |   |          |          |          |   |          |          |         |   |          |          |         |   |          |          |          |   |          |          |         |   |          |          |         |   |          |         |          |   |          |          |          |   |          |          |         |   |         |          |          |   |         |          |          |   |         |          |         |   |         |         |         |   |         |         |         |   |         |          |         |   |         |         |         |   |         |         |         |   |         |         |         |   |         |         |          |   |         |         |         |   |         |          |         |   |          |         |          |   |          |         |          |   |          |          |         |
| O                                              | 0.73766                                                                                                                                                                                                                                                                                                                                                                                                                                                                                                                                                                                                                                                                                                                                                                                                                                                                                                                                                                                                                                                                                                                                                                                                                                                                                                                                                                                                                                                                                                                                                                                                                                                                                                                                                                                                                                                                                                                                                                        | -0.97589 | -1.53760 |         |          |   |          |         |          |   |          |          |          |   |          |          |         |   |          |          |         |   |          |          |          |   |          |          |         |   |          |          |         |   |          |         |          |   |          |          |          |   |          |          |         |   |         |          |          |   |         |          |          |   |         |          |         |   |         |         |         |   |         |         |         |   |         |          |         |   |         |         |         |   |         |         |         |   |         |         |         |   |         |         |          |   |         |         |         |   |         |          |         |   |          |         |          |   |          |         |          |   |          |          |         |
| C                                              | 0.28621                                                                                                                                                                                                                                                                                                                                                                                                                                                                                                                                                                                                                                                                                                                                                                                                                                                                                                                                                                                                                                                                                                                                                                                                                                                                                                                                                                                                                                                                                                                                                                                                                                                                                                                                                                                                                                                                                                                                                                        | -0.56014 | 0.81090  |         |          |   |          |         |          |   |          |          |          |   |          |          |         |   |          |          |         |   |          |          |          |   |          |          |         |   |          |          |         |   |          |         |          |   |          |          |          |   |          |          |         |   |         |          |          |   |         |          |          |   |         |          |         |   |         |         |         |   |         |         |         |   |         |          |         |   |         |         |         |   |         |         |         |   |         |         |         |   |         |         |          |   |         |         |         |   |         |          |         |   |          |         |          |   |          |         |          |   |          |          |         |
| C                                              | 1.61020                                                                                                                                                                                                                                                                                                                                                                                                                                                                                                                                                                                                                                                                                                                                                                                                                                                                                                                                                                                                                                                                                                                                                                                                                                                                                                                                                                                                                                                                                                                                                                                                                                                                                                                                                                                                                                                                                                                                                                        | 0.14988  | 1.36094  |         |          |   |          |         |          |   |          |          |          |   |          |          |         |   |          |          |         |   |          |          |          |   |          |          |         |   |          |          |         |   |          |         |          |   |          |          |          |   |          |          |         |   |         |          |          |   |         |          |          |   |         |          |         |   |         |         |         |   |         |         |         |   |         |          |         |   |         |         |         |   |         |         |         |   |         |         |         |   |         |         |          |   |         |         |         |   |         |          |         |   |          |         |          |   |          |         |          |   |          |          |         |
| C                                              | 1.59089                                                                                                                                                                                                                                                                                                                                                                                                                                                                                                                                                                                                                                                                                                                                                                                                                                                                                                                                                                                                                                                                                                                                                                                                                                                                                                                                                                                                                                                                                                                                                                                                                                                                                                                                                                                                                                                                                                                                                                        | 1.67074  | 1.16548  |         |          |   |          |         |          |   |          |          |          |   |          |          |         |   |          |          |         |   |          |          |          |   |          |          |         |   |          |          |         |   |          |         |          |   |          |          |          |   |          |          |         |   |         |          |          |   |         |          |          |   |         |          |         |   |         |         |         |   |         |         |         |   |         |          |         |   |         |         |         |   |         |         |         |   |         |         |         |   |         |         |          |   |         |         |         |   |         |          |         |   |          |         |          |   |          |         |          |   |          |          |         |
| O                                              | 2.70893                                                                                                                                                                                                                                                                                                                                                                                                                                                                                                                                                                                                                                                                                                                                                                                                                                                                                                                                                                                                                                                                                                                                                                                                                                                                                                                                                                                                                                                                                                                                                                                                                                                                                                                                                                                                                                                                                                                                                                        | -0.46154 | 0.79881  |         |          |   |          |         |          |   |          |          |          |   |          |          |         |   |          |          |         |   |          |          |          |   |          |          |         |   |          |          |         |   |          |         |          |   |          |          |          |   |          |          |         |   |         |          |          |   |         |          |          |   |         |          |         |   |         |         |         |   |         |         |         |   |         |          |         |   |         |         |         |   |         |         |         |   |         |         |         |   |         |         |          |   |         |         |         |   |         |          |         |   |          |         |          |   |          |         |          |   |          |          |         |
| C                                              | 1.04630                                                                                                                                                                                                                                                                                                                                                                                                                                                                                                                                                                                                                                                                                                                                                                                                                                                                                                                                                                                                                                                                                                                                                                                                                                                                                                                                                                                                                                                                                                                                                                                                                                                                                                                                                                                                                                                                                                                                                                        | 2.52032  | 2.13804  |         |          |   |          |         |          |   |          |          |          |   |          |          |         |   |          |          |         |   |          |          |          |   |          |          |         |   |          |          |         |   |          |         |          |   |          |          |          |   |          |          |         |   |         |          |          |   |         |          |          |   |         |          |         |   |         |         |         |   |         |         |         |   |         |          |         |   |         |         |         |   |         |         |         |   |         |         |         |   |         |         |          |   |         |         |         |   |         |          |         |   |          |         |          |   |          |         |          |   |          |          |         |
| C                                              | 2.14310                                                                                                                                                                                                                                                                                                                                                                                                                                                                                                                                                                                                                                                                                                                                                                                                                                                                                                                                                                                                                                                                                                                                                                                                                                                                                                                                                                                                                                                                                                                                                                                                                                                                                                                                                                                                                                                                                                                                                                        | 2.25270  | 0.01589  |         |          |   |          |         |          |   |          |          |          |   |          |          |         |   |          |          |         |   |          |          |          |   |          |          |         |   |          |          |         |   |          |         |          |   |          |          |          |   |          |          |         |   |         |          |          |   |         |          |          |   |         |          |         |   |         |         |         |   |         |         |         |   |         |          |         |   |         |         |         |   |         |         |         |   |         |         |         |   |         |         |          |   |         |         |         |   |         |          |         |   |          |         |          |   |          |         |          |   |          |          |         |
| C                                              | 1.03046                                                                                                                                                                                                                                                                                                                                                                                                                                                                                                                                                                                                                                                                                                                                                                                                                                                                                                                                                                                                                                                                                                                                                                                                                                                                                                                                                                                                                                                                                                                                                                                                                                                                                                                                                                                                                                                                                                                                                                        | 3.90652  | 1.96145  |         |          |   |          |         |          |   |          |          |          |   |          |          |         |   |          |          |         |   |          |          |          |   |          |          |         |   |          |          |         |   |          |         |          |   |          |          |          |   |          |          |         |   |         |          |          |   |         |          |          |   |         |          |         |   |         |         |         |   |         |         |         |   |         |          |         |   |         |         |         |   |         |         |         |   |         |         |         |   |         |         |          |   |         |         |         |   |         |          |         |   |          |         |          |   |          |         |          |   |          |          |         |
| C                                              | 2.13083                                                                                                                                                                                                                                                                                                                                                                                                                                                                                                                                                                                                                                                                                                                                                                                                                                                                                                                                                                                                                                                                                                                                                                                                                                                                                                                                                                                                                                                                                                                                                                                                                                                                                                                                                                                                                                                                                                                                                                        | 3.63589  | -0.16675 |         |          |   |          |         |          |   |          |          |          |   |          |          |         |   |          |          |         |   |          |          |          |   |          |          |         |   |          |          |         |   |          |         |          |   |          |          |          |   |          |          |         |   |         |          |          |   |         |          |          |   |         |          |         |   |         |         |         |   |         |         |         |   |         |          |         |   |         |         |         |   |         |         |         |   |         |         |         |   |         |         |          |   |         |         |         |   |         |          |         |   |          |         |          |   |          |         |          |   |          |          |         |
| C                                              | 1.57080                                                                                                                                                                                                                                                                                                                                                                                                                                                                                                                                                                                                                                                                                                                                                                                                                                                                                                                                                                                                                                                                                                                                                                                                                                                                                                                                                                                                                                                                                                                                                                                                                                                                                                                                                                                                                                                                                                                                                                        | 4.47021  | 0.80466  |         |          |   |          |         |          |   |          |          |          |   |          |          |         |   |          |          |         |   |          |          |          |   |          |          |         |   |          |          |         |   |          |         |          |   |          |          |          |   |          |          |         |   |         |          |          |   |         |          |          |   |         |          |         |   |         |         |         |   |         |         |         |   |         |          |         |   |         |         |         |   |         |         |         |   |         |         |         |   |         |         |          |   |         |         |         |   |         |          |         |   |          |         |          |   |          |         |          |   |          |          |         |
| H                                              | 0.51209                                                                                                                                                                                                                                                                                                                                                                                                                                                                                                                                                                                                                                                                                                                                                                                                                                                                                                                                                                                                                                                                                                                                                                                                                                                                                                                                                                                                                                                                                                                                                                                                                                                                                                                                                                                                                                                                                                                                                                        | -1.62322 | 0.93556  |         |          |   |          |         |          |   |          |          |          |   |          |          |         |   |          |          |         |   |          |          |          |   |          |          |         |   |          |          |         |   |          |         |          |   |          |          |          |   |          |          |         |   |         |          |          |   |         |          |          |   |         |          |         |   |         |         |         |   |         |         |         |   |         |          |         |   |         |         |         |   |         |         |         |   |         |         |         |   |         |         |          |   |         |         |         |   |         |          |         |   |          |         |          |   |          |         |          |   |          |          |         |
| O                                              | -0.59885                                                                                                                                                                                                                                                                                                                                                                                                                                                                                                                                                                                                                                                                                                                                                                                                                                                                                                                                                                                                                                                                                                                                                                                                                                                                                                                                                                                                                                                                                                                                                                                                                                                                                                                                                                                                                                                                                                                                                                       | 0.74828  | -0.97645 |         |          |   |          |         |          |   |          |          |          |   |          |          |         |   |          |          |         |   |          |          |          |   |          |          |         |   |          |          |         |   |          |         |          |   |          |          |          |   |          |          |         |   |         |          |          |   |         |          |          |   |         |          |         |   |         |         |         |   |         |         |         |   |         |          |         |   |         |         |         |   |         |         |         |   |         |         |         |   |         |         |          |   |         |         |         |   |         |          |         |   |          |         |          |   |          |         |          |   |          |          |         |
| C                                              | -0.72397                                                                                                                                                                                                                                                                                                                                                                                                                                                                                                                                                                                                                                                                                                                                                                                                                                                                                                                                                                                                                                                                                                                                                                                                                                                                                                                                                                                                                                                                                                                                                                                                                                                                                                                                                                                                                                                                                                                                                                       | 1.07632  | -2.37068 |         |          |   |          |         |          |   |          |          |          |   |          |          |         |   |          |          |         |   |          |          |          |   |          |          |         |   |          |          |         |   |          |         |          |   |          |          |          |   |          |          |         |   |         |          |          |   |         |          |          |   |         |          |         |   |         |         |         |   |         |         |         |   |         |          |         |   |         |         |         |   |         |         |         |   |         |         |         |   |         |         |          |   |         |         |         |   |         |          |         |   |          |         |          |   |          |         |          |   |          |          |         |
| C                                              | -0.96096                                                                                                                                                                                                                                                                                                                                                                                                                                                                                                                                                                                                                                                                                                                                                                                                                                                                                                                                                                                                                                                                                                                                                                                                                                                                                                                                                                                                                                                                                                                                                                                                                                                                                                                                                                                                                                                                                                                                                                       | -0.63840 | 3.06498  |         |          |   |          |         |          |   |          |          |          |   |          |          |         |   |          |          |         |   |          |          |          |   |          |          |         |   |          |          |         |   |          |         |          |   |          |          |          |   |          |          |         |   |         |          |          |   |         |          |          |   |         |          |         |   |         |         |         |   |         |         |         |   |         |          |         |   |         |         |         |   |         |         |         |   |         |         |         |   |         |         |          |   |         |         |         |   |         |          |         |   |          |         |          |   |          |         |          |   |          |          |         |

|   |          |          |          |
|---|----------|----------|----------|
| N | 5.17823  | 0.04032  | 0.03011  |
| N | 3.84981  | -0.90042 | -1.58547 |
| H | 2.56492  | 4.06567  | -1.06657 |
| H | 1.56472  | 5.54811  | 0.66522  |
| H | 0.60515  | 4.54422  | 2.73245  |
| H | 0.64262  | 2.09792  | 3.05583  |
| H | 2.59563  | 1.60922  | -0.73185 |
| H | -0.22620 | -0.04466 | 3.61348  |
| H | -0.69060 | -1.69362 | 3.17909  |
| H | -1.93999 | -0.47936 | 3.52757  |
| H | 1.57574  | -0.02489 | 2.45234  |
| H | -1.22000 | 0.83665  | 1.50765  |
| H | -1.63778 | -2.98791 | 1.09716  |
| H | -5.26016 | -3.75909 | 0.25536  |
| H | -4.48134 | -3.67006 | -1.32663 |
| H | -3.68956 | -4.54074 | -0.00088 |
| H | -3.39884 | 0.79165  | 0.43007  |
| H | 4.30146  | 0.01075  | 0.61233  |
| H | 3.08493  | -0.81568 | -0.88104 |
| H | -7.81038 | 1.45708  | -2.63982 |
| H | -1.42399 | 1.91039  | -2.41231 |
| H | 0.24580  | 1.37153  | -2.77969 |
| H | -8.56598 | 1.38506  | -1.04809 |
| H | -1.11004 | 0.22224  | -2.93195 |
| H | -7.65094 | 2.84538  | -1.52379 |
| O | 2.51866  | -2.99856 | 1.63134  |
| H | 2.66931  | -2.05433 | 1.32977  |
| C | 2.62951  | -3.82585 | 0.49230  |
| H | 2.33655  | -4.84398 | 0.77654  |
| H | 3.65981  | -3.87574 | 0.09823  |
| H | 1.97530  | -3.50220 | -0.33268 |
| H | -5.56694 | -0.55198 | -0.69574 |
| H | 3.62810  | -1.02006 | -2.56293 |
| H | 6.08835  | 0.12312  | 0.45763  |
| C | 5.05319  | -0.45464 | -1.20396 |
| N | 6.09746  | -0.48792 | -2.05672 |
| H | 5.98412  | -1.03247 | -2.89973 |
| C | 7.43778  | -0.02601 | -1.72220 |
| H | 8.02651  | 0.00635  | -2.63979 |
| H | 7.94137  | -0.69038 | -1.00860 |
| H | 7.39690  | 0.98552  | -1.30709 |

Optimized Molecular Properties for TArg-Int2-2

|                                                |                                                                                                                                                                                                                                                                                                                                                                                                                                                                                                                                                                                                                                                                                                                                                                                                                                                                                                                                                                                                                                                                                                                                                                                                                                                                                                                                                                                                                                                                                                                                                                                                                                                                                                                                                                                                                                                                                                                                                                             |          |          |         |          |   |          |         |          |   |          |          |          |   |          |          |         |   |          |          |         |   |          |          |         |   |          |          |         |   |          |          |         |   |          |         |          |   |          |          |         |   |          |         |         |   |          |          |          |   |         |          |          |   |         |         |         |   |         |         |         |   |         |         |         |   |         |         |          |   |         |         |          |   |         |         |         |   |         |         |          |   |         |         |         |   |         |         |         |   |         |          |         |   |          |         |          |   |          |         |          |   |         |          |         |
|------------------------------------------------|-----------------------------------------------------------------------------------------------------------------------------------------------------------------------------------------------------------------------------------------------------------------------------------------------------------------------------------------------------------------------------------------------------------------------------------------------------------------------------------------------------------------------------------------------------------------------------------------------------------------------------------------------------------------------------------------------------------------------------------------------------------------------------------------------------------------------------------------------------------------------------------------------------------------------------------------------------------------------------------------------------------------------------------------------------------------------------------------------------------------------------------------------------------------------------------------------------------------------------------------------------------------------------------------------------------------------------------------------------------------------------------------------------------------------------------------------------------------------------------------------------------------------------------------------------------------------------------------------------------------------------------------------------------------------------------------------------------------------------------------------------------------------------------------------------------------------------------------------------------------------------------------------------------------------------------------------------------------------------|----------|----------|---------|----------|---|----------|---------|----------|---|----------|----------|----------|---|----------|----------|---------|---|----------|----------|---------|---|----------|----------|---------|---|----------|----------|---------|---|----------|----------|---------|---|----------|---------|----------|---|----------|----------|---------|---|----------|---------|---------|---|----------|----------|----------|---|---------|----------|----------|---|---------|---------|---------|---|---------|---------|---------|---|---------|---------|---------|---|---------|---------|----------|---|---------|---------|----------|---|---------|---------|---------|---|---------|---------|----------|---|---------|---------|---------|---|---------|---------|---------|---|---------|----------|---------|---|----------|---------|----------|---|----------|---------|----------|---|---------|----------|---------|
| Number of<br>(-)<br>Vibrational<br>Frequencies | 0                                                                                                                                                                                                                                                                                                                                                                                                                                                                                                                                                                                                                                                                                                                                                                                                                                                                                                                                                                                                                                                                                                                                                                                                                                                                                                                                                                                                                                                                                                                                                                                                                                                                                                                                                                                                                                                                                                                                                                           |          |          |         |          |   |          |         |          |   |          |          |          |   |          |          |         |   |          |          |         |   |          |          |         |   |          |          |         |   |          |          |         |   |          |         |          |   |          |          |         |   |          |         |         |   |          |          |          |   |         |          |          |   |         |         |         |   |         |         |         |   |         |         |         |   |         |         |          |   |         |         |          |   |         |         |         |   |         |         |          |   |         |         |         |   |         |         |         |   |         |          |         |   |          |         |          |   |          |         |          |   |         |          |         |
| Absolute<br>Energies<br>(Hartrees)             | <p><b>B3LYP/6-31G(d) (PCM)</b></p> <p>There are 19 positive frequencies below 100 cm<sup>-1</sup>.</p> <p>Zero-point correction: 0.564857 hartree<br/>         Enthalpy correction: 0.604672 hartree<br/>         Free Energy correction: 0.487994 hartree<br/>         Quasiharmonic Free Energy correction: 0.502831 hartree</p> <p>SCF Energy: -1546.466962 hartree<br/>         SCF Energy + ZPVE: -1545.902105 hartree<br/>         Enthalpy: -1545.862290 hartree<br/>         Free Energy: -1545.978968 hartree</p> <p>Free Energy with quasiharmonic correction: -1545.964131 hartree<br/>         (correction: 9.31 kcal/mol)</p> <p><b>B3LYP-D3/6-311+G(d,p) (PCM)</b></p> <p>SCF Done: E(RB3LYP) = -1547.02309325 A.U.</p>                                                                                                                                                                                                                                                                                                                                                                                                                                                                                                                                                                                                                                                                                                                                                                                                                                                                                                                                                                                                                                                                                                                                                                                                                                       |          |          |         |          |   |          |         |          |   |          |          |          |   |          |          |         |   |          |          |         |   |          |          |         |   |          |          |         |   |          |          |         |   |          |         |          |   |          |          |         |   |          |         |         |   |          |          |          |   |         |          |          |   |         |         |         |   |         |         |         |   |         |         |         |   |         |         |          |   |         |         |          |   |         |         |         |   |         |         |          |   |         |         |         |   |         |         |         |   |         |          |         |   |          |         |          |   |          |         |          |   |         |          |         |
| Cartesian<br>Coordinates                       | <p>(PCM)</p> <p>67</p> <p>spD3-opt-INT2-2-Targ.out Energy: -970771.6397760</p> <table> <tr><td>C</td><td>-6.05921</td><td>0.05763</td><td>-0.82241</td></tr> <tr><td>O</td><td>-5.17330</td><td>0.88750</td><td>-0.66584</td></tr> <tr><td>O</td><td>-5.99964</td><td>-1.19575</td><td>-0.37724</td></tr> <tr><td>C</td><td>-2.77632</td><td>-2.68207</td><td>1.13375</td></tr> <tr><td>C</td><td>-1.53638</td><td>-2.21117</td><td>1.48815</td></tr> <tr><td>N</td><td>-3.58742</td><td>-1.60809</td><td>0.81119</td></tr> <tr><td>C</td><td>-2.84995</td><td>-0.52346</td><td>0.97037</td></tr> <tr><td>N</td><td>-1.59408</td><td>-0.82852</td><td>1.38281</td></tr> <tr><td>C</td><td>-7.35682</td><td>0.34464</td><td>-1.54626</td></tr> <tr><td>C</td><td>-3.26721</td><td>-4.09433</td><td>1.07540</td></tr> <tr><td>C</td><td>-0.50871</td><td>0.13945</td><td>1.62102</td></tr> <tr><td>C</td><td>-0.02175</td><td>-0.07536</td><td>-0.88220</td></tr> <tr><td>O</td><td>0.34507</td><td>-0.87105</td><td>-1.73035</td></tr> <tr><td>C</td><td>0.57520</td><td>0.02339</td><td>0.51592</td></tr> <tr><td>C</td><td>1.68470</td><td>1.14267</td><td>0.57638</td></tr> <tr><td>C</td><td>1.17841</td><td>2.57200</td><td>0.45161</td></tr> <tr><td>O</td><td>2.63387</td><td>0.90979</td><td>-0.44922</td></tr> <tr><td>C</td><td>1.05866</td><td>3.18249</td><td>-0.80472</td></tr> <tr><td>C</td><td>0.84991</td><td>3.31655</td><td>1.59170</td></tr> <tr><td>C</td><td>0.60085</td><td>4.49500</td><td>-0.91677</td></tr> <tr><td>C</td><td>0.38375</td><td>4.62898</td><td>1.48215</td></tr> <tr><td>C</td><td>0.25503</td><td>5.22161</td><td>0.22570</td></tr> <tr><td>H</td><td>1.11584</td><td>-0.91802</td><td>0.66104</td></tr> <tr><td>O</td><td>-1.00531</td><td>0.80972</td><td>-1.08422</td></tr> <tr><td>C</td><td>-1.67458</td><td>0.76852</td><td>-2.36303</td></tr> <tr><td>C</td><td>0.05110</td><td>-0.05499</td><td>3.03620</td></tr> </table> | C        | -6.05921 | 0.05763 | -0.82241 | O | -5.17330 | 0.88750 | -0.66584 | O | -5.99964 | -1.19575 | -0.37724 | C | -2.77632 | -2.68207 | 1.13375 | C | -1.53638 | -2.21117 | 1.48815 | N | -3.58742 | -1.60809 | 0.81119 | C | -2.84995 | -0.52346 | 0.97037 | N | -1.59408 | -0.82852 | 1.38281 | C | -7.35682 | 0.34464 | -1.54626 | C | -3.26721 | -4.09433 | 1.07540 | C | -0.50871 | 0.13945 | 1.62102 | C | -0.02175 | -0.07536 | -0.88220 | O | 0.34507 | -0.87105 | -1.73035 | C | 0.57520 | 0.02339 | 0.51592 | C | 1.68470 | 1.14267 | 0.57638 | C | 1.17841 | 2.57200 | 0.45161 | O | 2.63387 | 0.90979 | -0.44922 | C | 1.05866 | 3.18249 | -0.80472 | C | 0.84991 | 3.31655 | 1.59170 | C | 0.60085 | 4.49500 | -0.91677 | C | 0.38375 | 4.62898 | 1.48215 | C | 0.25503 | 5.22161 | 0.22570 | H | 1.11584 | -0.91802 | 0.66104 | O | -1.00531 | 0.80972 | -1.08422 | C | -1.67458 | 0.76852 | -2.36303 | C | 0.05110 | -0.05499 | 3.03620 |
| C                                              | -6.05921                                                                                                                                                                                                                                                                                                                                                                                                                                                                                                                                                                                                                                                                                                                                                                                                                                                                                                                                                                                                                                                                                                                                                                                                                                                                                                                                                                                                                                                                                                                                                                                                                                                                                                                                                                                                                                                                                                                                                                    | 0.05763  | -0.82241 |         |          |   |          |         |          |   |          |          |          |   |          |          |         |   |          |          |         |   |          |          |         |   |          |          |         |   |          |          |         |   |          |         |          |   |          |          |         |   |          |         |         |   |          |          |          |   |         |          |          |   |         |         |         |   |         |         |         |   |         |         |         |   |         |         |          |   |         |         |          |   |         |         |         |   |         |         |          |   |         |         |         |   |         |         |         |   |         |          |         |   |          |         |          |   |          |         |          |   |         |          |         |
| O                                              | -5.17330                                                                                                                                                                                                                                                                                                                                                                                                                                                                                                                                                                                                                                                                                                                                                                                                                                                                                                                                                                                                                                                                                                                                                                                                                                                                                                                                                                                                                                                                                                                                                                                                                                                                                                                                                                                                                                                                                                                                                                    | 0.88750  | -0.66584 |         |          |   |          |         |          |   |          |          |          |   |          |          |         |   |          |          |         |   |          |          |         |   |          |          |         |   |          |          |         |   |          |         |          |   |          |          |         |   |          |         |         |   |          |          |          |   |         |          |          |   |         |         |         |   |         |         |         |   |         |         |         |   |         |         |          |   |         |         |          |   |         |         |         |   |         |         |          |   |         |         |         |   |         |         |         |   |         |          |         |   |          |         |          |   |          |         |          |   |         |          |         |
| O                                              | -5.99964                                                                                                                                                                                                                                                                                                                                                                                                                                                                                                                                                                                                                                                                                                                                                                                                                                                                                                                                                                                                                                                                                                                                                                                                                                                                                                                                                                                                                                                                                                                                                                                                                                                                                                                                                                                                                                                                                                                                                                    | -1.19575 | -0.37724 |         |          |   |          |         |          |   |          |          |          |   |          |          |         |   |          |          |         |   |          |          |         |   |          |          |         |   |          |          |         |   |          |         |          |   |          |          |         |   |          |         |         |   |          |          |          |   |         |          |          |   |         |         |         |   |         |         |         |   |         |         |         |   |         |         |          |   |         |         |          |   |         |         |         |   |         |         |          |   |         |         |         |   |         |         |         |   |         |          |         |   |          |         |          |   |          |         |          |   |         |          |         |
| C                                              | -2.77632                                                                                                                                                                                                                                                                                                                                                                                                                                                                                                                                                                                                                                                                                                                                                                                                                                                                                                                                                                                                                                                                                                                                                                                                                                                                                                                                                                                                                                                                                                                                                                                                                                                                                                                                                                                                                                                                                                                                                                    | -2.68207 | 1.13375  |         |          |   |          |         |          |   |          |          |          |   |          |          |         |   |          |          |         |   |          |          |         |   |          |          |         |   |          |          |         |   |          |         |          |   |          |          |         |   |          |         |         |   |          |          |          |   |         |          |          |   |         |         |         |   |         |         |         |   |         |         |         |   |         |         |          |   |         |         |          |   |         |         |         |   |         |         |          |   |         |         |         |   |         |         |         |   |         |          |         |   |          |         |          |   |          |         |          |   |         |          |         |
| C                                              | -1.53638                                                                                                                                                                                                                                                                                                                                                                                                                                                                                                                                                                                                                                                                                                                                                                                                                                                                                                                                                                                                                                                                                                                                                                                                                                                                                                                                                                                                                                                                                                                                                                                                                                                                                                                                                                                                                                                                                                                                                                    | -2.21117 | 1.48815  |         |          |   |          |         |          |   |          |          |          |   |          |          |         |   |          |          |         |   |          |          |         |   |          |          |         |   |          |          |         |   |          |         |          |   |          |          |         |   |          |         |         |   |          |          |          |   |         |          |          |   |         |         |         |   |         |         |         |   |         |         |         |   |         |         |          |   |         |         |          |   |         |         |         |   |         |         |          |   |         |         |         |   |         |         |         |   |         |          |         |   |          |         |          |   |          |         |          |   |         |          |         |
| N                                              | -3.58742                                                                                                                                                                                                                                                                                                                                                                                                                                                                                                                                                                                                                                                                                                                                                                                                                                                                                                                                                                                                                                                                                                                                                                                                                                                                                                                                                                                                                                                                                                                                                                                                                                                                                                                                                                                                                                                                                                                                                                    | -1.60809 | 0.81119  |         |          |   |          |         |          |   |          |          |          |   |          |          |         |   |          |          |         |   |          |          |         |   |          |          |         |   |          |          |         |   |          |         |          |   |          |          |         |   |          |         |         |   |          |          |          |   |         |          |          |   |         |         |         |   |         |         |         |   |         |         |         |   |         |         |          |   |         |         |          |   |         |         |         |   |         |         |          |   |         |         |         |   |         |         |         |   |         |          |         |   |          |         |          |   |          |         |          |   |         |          |         |
| C                                              | -2.84995                                                                                                                                                                                                                                                                                                                                                                                                                                                                                                                                                                                                                                                                                                                                                                                                                                                                                                                                                                                                                                                                                                                                                                                                                                                                                                                                                                                                                                                                                                                                                                                                                                                                                                                                                                                                                                                                                                                                                                    | -0.52346 | 0.97037  |         |          |   |          |         |          |   |          |          |          |   |          |          |         |   |          |          |         |   |          |          |         |   |          |          |         |   |          |          |         |   |          |         |          |   |          |          |         |   |          |         |         |   |          |          |          |   |         |          |          |   |         |         |         |   |         |         |         |   |         |         |         |   |         |         |          |   |         |         |          |   |         |         |         |   |         |         |          |   |         |         |         |   |         |         |         |   |         |          |         |   |          |         |          |   |          |         |          |   |         |          |         |
| N                                              | -1.59408                                                                                                                                                                                                                                                                                                                                                                                                                                                                                                                                                                                                                                                                                                                                                                                                                                                                                                                                                                                                                                                                                                                                                                                                                                                                                                                                                                                                                                                                                                                                                                                                                                                                                                                                                                                                                                                                                                                                                                    | -0.82852 | 1.38281  |         |          |   |          |         |          |   |          |          |          |   |          |          |         |   |          |          |         |   |          |          |         |   |          |          |         |   |          |          |         |   |          |         |          |   |          |          |         |   |          |         |         |   |          |          |          |   |         |          |          |   |         |         |         |   |         |         |         |   |         |         |         |   |         |         |          |   |         |         |          |   |         |         |         |   |         |         |          |   |         |         |         |   |         |         |         |   |         |          |         |   |          |         |          |   |          |         |          |   |         |          |         |
| C                                              | -7.35682                                                                                                                                                                                                                                                                                                                                                                                                                                                                                                                                                                                                                                                                                                                                                                                                                                                                                                                                                                                                                                                                                                                                                                                                                                                                                                                                                                                                                                                                                                                                                                                                                                                                                                                                                                                                                                                                                                                                                                    | 0.34464  | -1.54626 |         |          |   |          |         |          |   |          |          |          |   |          |          |         |   |          |          |         |   |          |          |         |   |          |          |         |   |          |          |         |   |          |         |          |   |          |          |         |   |          |         |         |   |          |          |          |   |         |          |          |   |         |         |         |   |         |         |         |   |         |         |         |   |         |         |          |   |         |         |          |   |         |         |         |   |         |         |          |   |         |         |         |   |         |         |         |   |         |          |         |   |          |         |          |   |          |         |          |   |         |          |         |
| C                                              | -3.26721                                                                                                                                                                                                                                                                                                                                                                                                                                                                                                                                                                                                                                                                                                                                                                                                                                                                                                                                                                                                                                                                                                                                                                                                                                                                                                                                                                                                                                                                                                                                                                                                                                                                                                                                                                                                                                                                                                                                                                    | -4.09433 | 1.07540  |         |          |   |          |         |          |   |          |          |          |   |          |          |         |   |          |          |         |   |          |          |         |   |          |          |         |   |          |          |         |   |          |         |          |   |          |          |         |   |          |         |         |   |          |          |          |   |         |          |          |   |         |         |         |   |         |         |         |   |         |         |         |   |         |         |          |   |         |         |          |   |         |         |         |   |         |         |          |   |         |         |         |   |         |         |         |   |         |          |         |   |          |         |          |   |          |         |          |   |         |          |         |
| C                                              | -0.50871                                                                                                                                                                                                                                                                                                                                                                                                                                                                                                                                                                                                                                                                                                                                                                                                                                                                                                                                                                                                                                                                                                                                                                                                                                                                                                                                                                                                                                                                                                                                                                                                                                                                                                                                                                                                                                                                                                                                                                    | 0.13945  | 1.62102  |         |          |   |          |         |          |   |          |          |          |   |          |          |         |   |          |          |         |   |          |          |         |   |          |          |         |   |          |          |         |   |          |         |          |   |          |          |         |   |          |         |         |   |          |          |          |   |         |          |          |   |         |         |         |   |         |         |         |   |         |         |         |   |         |         |          |   |         |         |          |   |         |         |         |   |         |         |          |   |         |         |         |   |         |         |         |   |         |          |         |   |          |         |          |   |          |         |          |   |         |          |         |
| C                                              | -0.02175                                                                                                                                                                                                                                                                                                                                                                                                                                                                                                                                                                                                                                                                                                                                                                                                                                                                                                                                                                                                                                                                                                                                                                                                                                                                                                                                                                                                                                                                                                                                                                                                                                                                                                                                                                                                                                                                                                                                                                    | -0.07536 | -0.88220 |         |          |   |          |         |          |   |          |          |          |   |          |          |         |   |          |          |         |   |          |          |         |   |          |          |         |   |          |          |         |   |          |         |          |   |          |          |         |   |          |         |         |   |          |          |          |   |         |          |          |   |         |         |         |   |         |         |         |   |         |         |         |   |         |         |          |   |         |         |          |   |         |         |         |   |         |         |          |   |         |         |         |   |         |         |         |   |         |          |         |   |          |         |          |   |          |         |          |   |         |          |         |
| O                                              | 0.34507                                                                                                                                                                                                                                                                                                                                                                                                                                                                                                                                                                                                                                                                                                                                                                                                                                                                                                                                                                                                                                                                                                                                                                                                                                                                                                                                                                                                                                                                                                                                                                                                                                                                                                                                                                                                                                                                                                                                                                     | -0.87105 | -1.73035 |         |          |   |          |         |          |   |          |          |          |   |          |          |         |   |          |          |         |   |          |          |         |   |          |          |         |   |          |          |         |   |          |         |          |   |          |          |         |   |          |         |         |   |          |          |          |   |         |          |          |   |         |         |         |   |         |         |         |   |         |         |         |   |         |         |          |   |         |         |          |   |         |         |         |   |         |         |          |   |         |         |         |   |         |         |         |   |         |          |         |   |          |         |          |   |          |         |          |   |         |          |         |
| C                                              | 0.57520                                                                                                                                                                                                                                                                                                                                                                                                                                                                                                                                                                                                                                                                                                                                                                                                                                                                                                                                                                                                                                                                                                                                                                                                                                                                                                                                                                                                                                                                                                                                                                                                                                                                                                                                                                                                                                                                                                                                                                     | 0.02339  | 0.51592  |         |          |   |          |         |          |   |          |          |          |   |          |          |         |   |          |          |         |   |          |          |         |   |          |          |         |   |          |          |         |   |          |         |          |   |          |          |         |   |          |         |         |   |          |          |          |   |         |          |          |   |         |         |         |   |         |         |         |   |         |         |         |   |         |         |          |   |         |         |          |   |         |         |         |   |         |         |          |   |         |         |         |   |         |         |         |   |         |          |         |   |          |         |          |   |          |         |          |   |         |          |         |
| C                                              | 1.68470                                                                                                                                                                                                                                                                                                                                                                                                                                                                                                                                                                                                                                                                                                                                                                                                                                                                                                                                                                                                                                                                                                                                                                                                                                                                                                                                                                                                                                                                                                                                                                                                                                                                                                                                                                                                                                                                                                                                                                     | 1.14267  | 0.57638  |         |          |   |          |         |          |   |          |          |          |   |          |          |         |   |          |          |         |   |          |          |         |   |          |          |         |   |          |          |         |   |          |         |          |   |          |          |         |   |          |         |         |   |          |          |          |   |         |          |          |   |         |         |         |   |         |         |         |   |         |         |         |   |         |         |          |   |         |         |          |   |         |         |         |   |         |         |          |   |         |         |         |   |         |         |         |   |         |          |         |   |          |         |          |   |          |         |          |   |         |          |         |
| C                                              | 1.17841                                                                                                                                                                                                                                                                                                                                                                                                                                                                                                                                                                                                                                                                                                                                                                                                                                                                                                                                                                                                                                                                                                                                                                                                                                                                                                                                                                                                                                                                                                                                                                                                                                                                                                                                                                                                                                                                                                                                                                     | 2.57200  | 0.45161  |         |          |   |          |         |          |   |          |          |          |   |          |          |         |   |          |          |         |   |          |          |         |   |          |          |         |   |          |          |         |   |          |         |          |   |          |          |         |   |          |         |         |   |          |          |          |   |         |          |          |   |         |         |         |   |         |         |         |   |         |         |         |   |         |         |          |   |         |         |          |   |         |         |         |   |         |         |          |   |         |         |         |   |         |         |         |   |         |          |         |   |          |         |          |   |          |         |          |   |         |          |         |
| O                                              | 2.63387                                                                                                                                                                                                                                                                                                                                                                                                                                                                                                                                                                                                                                                                                                                                                                                                                                                                                                                                                                                                                                                                                                                                                                                                                                                                                                                                                                                                                                                                                                                                                                                                                                                                                                                                                                                                                                                                                                                                                                     | 0.90979  | -0.44922 |         |          |   |          |         |          |   |          |          |          |   |          |          |         |   |          |          |         |   |          |          |         |   |          |          |         |   |          |          |         |   |          |         |          |   |          |          |         |   |          |         |         |   |          |          |          |   |         |          |          |   |         |         |         |   |         |         |         |   |         |         |         |   |         |         |          |   |         |         |          |   |         |         |         |   |         |         |          |   |         |         |         |   |         |         |         |   |         |          |         |   |          |         |          |   |          |         |          |   |         |          |         |
| C                                              | 1.05866                                                                                                                                                                                                                                                                                                                                                                                                                                                                                                                                                                                                                                                                                                                                                                                                                                                                                                                                                                                                                                                                                                                                                                                                                                                                                                                                                                                                                                                                                                                                                                                                                                                                                                                                                                                                                                                                                                                                                                     | 3.18249  | -0.80472 |         |          |   |          |         |          |   |          |          |          |   |          |          |         |   |          |          |         |   |          |          |         |   |          |          |         |   |          |          |         |   |          |         |          |   |          |          |         |   |          |         |         |   |          |          |          |   |         |          |          |   |         |         |         |   |         |         |         |   |         |         |         |   |         |         |          |   |         |         |          |   |         |         |         |   |         |         |          |   |         |         |         |   |         |         |         |   |         |          |         |   |          |         |          |   |          |         |          |   |         |          |         |
| C                                              | 0.84991                                                                                                                                                                                                                                                                                                                                                                                                                                                                                                                                                                                                                                                                                                                                                                                                                                                                                                                                                                                                                                                                                                                                                                                                                                                                                                                                                                                                                                                                                                                                                                                                                                                                                                                                                                                                                                                                                                                                                                     | 3.31655  | 1.59170  |         |          |   |          |         |          |   |          |          |          |   |          |          |         |   |          |          |         |   |          |          |         |   |          |          |         |   |          |          |         |   |          |         |          |   |          |          |         |   |          |         |         |   |          |          |          |   |         |          |          |   |         |         |         |   |         |         |         |   |         |         |         |   |         |         |          |   |         |         |          |   |         |         |         |   |         |         |          |   |         |         |         |   |         |         |         |   |         |          |         |   |          |         |          |   |          |         |          |   |         |          |         |
| C                                              | 0.60085                                                                                                                                                                                                                                                                                                                                                                                                                                                                                                                                                                                                                                                                                                                                                                                                                                                                                                                                                                                                                                                                                                                                                                                                                                                                                                                                                                                                                                                                                                                                                                                                                                                                                                                                                                                                                                                                                                                                                                     | 4.49500  | -0.91677 |         |          |   |          |         |          |   |          |          |          |   |          |          |         |   |          |          |         |   |          |          |         |   |          |          |         |   |          |          |         |   |          |         |          |   |          |          |         |   |          |         |         |   |          |          |          |   |         |          |          |   |         |         |         |   |         |         |         |   |         |         |         |   |         |         |          |   |         |         |          |   |         |         |         |   |         |         |          |   |         |         |         |   |         |         |         |   |         |          |         |   |          |         |          |   |          |         |          |   |         |          |         |
| C                                              | 0.38375                                                                                                                                                                                                                                                                                                                                                                                                                                                                                                                                                                                                                                                                                                                                                                                                                                                                                                                                                                                                                                                                                                                                                                                                                                                                                                                                                                                                                                                                                                                                                                                                                                                                                                                                                                                                                                                                                                                                                                     | 4.62898  | 1.48215  |         |          |   |          |         |          |   |          |          |          |   |          |          |         |   |          |          |         |   |          |          |         |   |          |          |         |   |          |          |         |   |          |         |          |   |          |          |         |   |          |         |         |   |          |          |          |   |         |          |          |   |         |         |         |   |         |         |         |   |         |         |         |   |         |         |          |   |         |         |          |   |         |         |         |   |         |         |          |   |         |         |         |   |         |         |         |   |         |          |         |   |          |         |          |   |          |         |          |   |         |          |         |
| C                                              | 0.25503                                                                                                                                                                                                                                                                                                                                                                                                                                                                                                                                                                                                                                                                                                                                                                                                                                                                                                                                                                                                                                                                                                                                                                                                                                                                                                                                                                                                                                                                                                                                                                                                                                                                                                                                                                                                                                                                                                                                                                     | 5.22161  | 0.22570  |         |          |   |          |         |          |   |          |          |          |   |          |          |         |   |          |          |         |   |          |          |         |   |          |          |         |   |          |          |         |   |          |         |          |   |          |          |         |   |          |         |         |   |          |          |          |   |         |          |          |   |         |         |         |   |         |         |         |   |         |         |         |   |         |         |          |   |         |         |          |   |         |         |         |   |         |         |          |   |         |         |         |   |         |         |         |   |         |          |         |   |          |         |          |   |          |         |          |   |         |          |         |
| H                                              | 1.11584                                                                                                                                                                                                                                                                                                                                                                                                                                                                                                                                                                                                                                                                                                                                                                                                                                                                                                                                                                                                                                                                                                                                                                                                                                                                                                                                                                                                                                                                                                                                                                                                                                                                                                                                                                                                                                                                                                                                                                     | -0.91802 | 0.66104  |         |          |   |          |         |          |   |          |          |          |   |          |          |         |   |          |          |         |   |          |          |         |   |          |          |         |   |          |          |         |   |          |         |          |   |          |          |         |   |          |         |         |   |          |          |          |   |         |          |          |   |         |         |         |   |         |         |         |   |         |         |         |   |         |         |          |   |         |         |          |   |         |         |         |   |         |         |          |   |         |         |         |   |         |         |         |   |         |          |         |   |          |         |          |   |          |         |          |   |         |          |         |
| O                                              | -1.00531                                                                                                                                                                                                                                                                                                                                                                                                                                                                                                                                                                                                                                                                                                                                                                                                                                                                                                                                                                                                                                                                                                                                                                                                                                                                                                                                                                                                                                                                                                                                                                                                                                                                                                                                                                                                                                                                                                                                                                    | 0.80972  | -1.08422 |         |          |   |          |         |          |   |          |          |          |   |          |          |         |   |          |          |         |   |          |          |         |   |          |          |         |   |          |          |         |   |          |         |          |   |          |          |         |   |          |         |         |   |          |          |          |   |         |          |          |   |         |         |         |   |         |         |         |   |         |         |         |   |         |         |          |   |         |         |          |   |         |         |         |   |         |         |          |   |         |         |         |   |         |         |         |   |         |          |         |   |          |         |          |   |          |         |          |   |         |          |         |
| C                                              | -1.67458                                                                                                                                                                                                                                                                                                                                                                                                                                                                                                                                                                                                                                                                                                                                                                                                                                                                                                                                                                                                                                                                                                                                                                                                                                                                                                                                                                                                                                                                                                                                                                                                                                                                                                                                                                                                                                                                                                                                                                    | 0.76852  | -2.36303 |         |          |   |          |         |          |   |          |          |          |   |          |          |         |   |          |          |         |   |          |          |         |   |          |          |         |   |          |          |         |   |          |         |          |   |          |          |         |   |          |         |         |   |          |          |          |   |         |          |          |   |         |         |         |   |         |         |         |   |         |         |         |   |         |         |          |   |         |         |          |   |         |         |         |   |         |         |          |   |         |         |         |   |         |         |         |   |         |          |         |   |          |         |          |   |          |         |          |   |         |          |         |
| C                                              | 0.05110                                                                                                                                                                                                                                                                                                                                                                                                                                                                                                                                                                                                                                                                                                                                                                                                                                                                                                                                                                                                                                                                                                                                                                                                                                                                                                                                                                                                                                                                                                                                                                                                                                                                                                                                                                                                                                                                                                                                                                     | -0.05499 | 3.03620  |         |          |   |          |         |          |   |          |          |          |   |          |          |         |   |          |          |         |   |          |          |         |   |          |          |         |   |          |          |         |   |          |         |          |   |          |          |         |   |          |         |         |   |          |          |          |   |         |          |          |   |         |         |         |   |         |         |         |   |         |         |         |   |         |         |          |   |         |         |          |   |         |         |         |   |         |         |          |   |         |         |         |   |         |         |         |   |         |          |         |   |          |         |          |   |          |         |          |   |         |          |         |



|   |          |          |          |
|---|----------|----------|----------|
| N | 3.72993  | -1.51565 | -0.22817 |
| N | 2.55999  | -2.95578 | -1.62339 |
| H | 0.13585  | 5.18934  | 2.37966  |
| H | -0.10071 | 6.24459  | 0.13703  |
| H | 0.51797  | 4.95375  | -1.89867 |
| H | 1.34612  | 2.62765  | -1.69132 |
| H | 0.97476  | 2.87916  | 2.57921  |
| H | 0.76962  | 0.72779  | 3.28900  |
| H | 0.56032  | -1.01939 | 3.13663  |
| H | -0.76269 | -0.01694 | 3.76636  |
| H | 2.15819  | 1.03521  | 1.56345  |
| H | -0.97960 | 1.12274  | 1.54968  |
| H | -0.64289 | -2.72846 | 1.80253  |
| H | -4.11445 | -4.24939 | 1.75421  |
| H | -3.60835 | -4.35465 | 0.06619  |
| H | -2.47465 | -4.79406 | 1.35702  |
| H | -3.18372 | 0.48318  | 0.76707  |
| H | 2.93184  | -0.06185 | -0.41938 |
| H | 1.83426  | -2.24001 | -1.63944 |
| H | -8.20450 | 0.17294  | -0.87440 |
| H | -2.59285 | 1.33834  | -2.22741 |
| H | -1.04077 | 1.22551  | -3.12695 |
| H | -7.36879 | 1.37685  | -1.89843 |
| H | -1.89823 | -0.26320 | -2.63896 |
| H | -7.47158 | -0.33839 | -2.39456 |
| O | 5.33030  | 1.21315  | 0.35780  |
| H | 4.38826  | 1.27736  | 0.09005  |
| C | 6.10428  | 1.39688  | -0.81580 |
| H | 7.15873  | 1.29984  | -0.53654 |
| H | 5.96265  | 2.39331  | -1.26289 |
| H | 5.88395  | 0.64233  | -1.58670 |
| H | -5.10843 | -1.36310 | 0.08718  |
| H | 4.62180  | -1.36328 | 0.23687  |
| H | 2.19660  | -3.90054 | -1.59326 |
| C | 3.61355  | -2.68765 | -0.77513 |
| N | 4.47499  | -3.74835 | -0.58829 |
| H | 4.49807  | -4.41130 | -1.35290 |
| C | 5.72839  | -3.58312 | 0.13123  |
| H | 6.22353  | -4.55451 | 0.19048  |
| H | 5.53231  | -3.24156 | 1.15252  |
| H | 6.41237  | -2.86940 | -0.35048 |

Optimized Molecular Properties for TArg-TS3-1

|                                                |                                                                                                                                                                                                                                                                                                                                                                                                                                                                                                                                                                                                                                                                                                                                                                                                                                                                                                                                                                                                                                                                                                                                                                                                                                                                                                                                                                                                                                                                                                                                                                                                                                                                                                                                                                                                                                                                                                                                                                             |          |          |         |         |   |         |         |         |   |         |          |         |   |         |          |          |   |         |          |          |   |         |          |          |   |         |         |          |   |         |          |          |   |         |         |         |   |         |          |          |   |         |         |          |   |          |         |         |   |          |          |         |   |          |         |          |   |          |         |          |   |          |         |          |   |          |          |          |   |          |         |          |   |          |         |          |   |          |         |          |   |          |         |         |   |          |         |          |   |          |          |          |   |         |         |         |   |         |         |         |   |         |         |          |
|------------------------------------------------|-----------------------------------------------------------------------------------------------------------------------------------------------------------------------------------------------------------------------------------------------------------------------------------------------------------------------------------------------------------------------------------------------------------------------------------------------------------------------------------------------------------------------------------------------------------------------------------------------------------------------------------------------------------------------------------------------------------------------------------------------------------------------------------------------------------------------------------------------------------------------------------------------------------------------------------------------------------------------------------------------------------------------------------------------------------------------------------------------------------------------------------------------------------------------------------------------------------------------------------------------------------------------------------------------------------------------------------------------------------------------------------------------------------------------------------------------------------------------------------------------------------------------------------------------------------------------------------------------------------------------------------------------------------------------------------------------------------------------------------------------------------------------------------------------------------------------------------------------------------------------------------------------------------------------------------------------------------------------------|----------|----------|---------|---------|---|---------|---------|---------|---|---------|----------|---------|---|---------|----------|----------|---|---------|----------|----------|---|---------|----------|----------|---|---------|---------|----------|---|---------|----------|----------|---|---------|---------|---------|---|---------|----------|----------|---|---------|---------|----------|---|----------|---------|---------|---|----------|----------|---------|---|----------|---------|----------|---|----------|---------|----------|---|----------|---------|----------|---|----------|----------|----------|---|----------|---------|----------|---|----------|---------|----------|---|----------|---------|----------|---|----------|---------|---------|---|----------|---------|----------|---|----------|----------|----------|---|---------|---------|---------|---|---------|---------|---------|---|---------|---------|----------|
| Number of<br>(-)<br>Vibrational<br>Frequencies | 0 (-1227.5912)                                                                                                                                                                                                                                                                                                                                                                                                                                                                                                                                                                                                                                                                                                                                                                                                                                                                                                                                                                                                                                                                                                                                                                                                                                                                                                                                                                                                                                                                                                                                                                                                                                                                                                                                                                                                                                                                                                                                                              |          |          |         |         |   |         |         |         |   |         |          |         |   |         |          |          |   |         |          |          |   |         |          |          |   |         |         |          |   |         |          |          |   |         |         |         |   |         |          |          |   |         |         |          |   |          |         |         |   |          |          |         |   |          |         |          |   |          |         |          |   |          |         |          |   |          |          |          |   |          |         |          |   |          |         |          |   |          |         |          |   |          |         |         |   |          |         |          |   |          |          |          |   |         |         |         |   |         |         |         |   |         |         |          |
| Absolute<br>Energies<br>(Hartrees)             | <p><b>B3LYP/6-31G(d) (PCM)</b></p> <p>There are 18 positive frequencies below 100 cm<sup>-1</sup>.</p> <p>Zero-point correction: 0.558959 hartree<br/>         Enthalpy correction: 0.598288 hartree<br/>         Free Energy correction: 0.482736 hartree<br/>         Quasiharmonic Free Energy correction: 0.497789 hartree</p> <p>SCF Energy: -1546.422087 hartree<br/>         SCF Energy + ZPVE: -1545.863128 hartree<br/>         Enthalpy: -1545.823799 hartree<br/>         Free Energy: -1545.939351 hartree</p> <p>Free Energy with quasiharmonic correction: -1545.924298 hartree<br/>         (correction: 9.45 kcal/mol)</p> <p><b>B3LYP-D3/6-311+G(d,p) (PCM)</b></p> <p>SCF Done: E(RB3LYP) = -1546.97975040 A.U.</p>                                                                                                                                                                                                                                                                                                                                                                                                                                                                                                                                                                                                                                                                                                                                                                                                                                                                                                                                                                                                                                                                                                                                                                                                                                       |          |          |         |         |   |         |         |         |   |         |          |         |   |         |          |          |   |         |          |          |   |         |          |          |   |         |         |          |   |         |          |          |   |         |         |         |   |         |          |          |   |         |         |          |   |          |         |         |   |          |          |         |   |          |         |          |   |          |         |          |   |          |         |          |   |          |          |          |   |          |         |          |   |          |         |          |   |          |         |          |   |          |         |         |   |          |         |          |   |          |          |          |   |         |         |         |   |         |         |         |   |         |         |          |
| Cartesian<br>Coordinates                       | <p>(PCM)</p> <p>67</p> <p>spD3-TS3-meoh-Targ.out Energy: -970744.4417273</p> <table> <tr><td>C</td><td>6.79934</td><td>0.81068</td><td>1.13739</td></tr> <tr><td>O</td><td>5.88474</td><td>1.62419</td><td>1.12891</td></tr> <tr><td>O</td><td>6.72512</td><td>-0.40951</td><td>0.61603</td></tr> <tr><td>C</td><td>3.66395</td><td>-1.83800</td><td>-1.13562</td></tr> <tr><td>C</td><td>2.38732</td><td>-1.44322</td><td>-1.45671</td></tr> <tr><td>N</td><td>4.29565</td><td>-0.80998</td><td>-0.45825</td></tr> <tr><td>C</td><td>3.41228</td><td>0.17338</td><td>-0.37643</td></tr> <tr><td>N</td><td>2.23807</td><td>-0.15923</td><td>-0.95981</td></tr> <tr><td>C</td><td>8.15577</td><td>1.08857</td><td>1.75246</td></tr> <tr><td>C</td><td>4.34724</td><td>-3.13913</td><td>-1.42145</td></tr> <tr><td>C</td><td>1.07683</td><td>0.75292</td><td>-1.12806</td></tr> <tr><td>C</td><td>-0.33763</td><td>0.03579</td><td>0.85098</td></tr> <tr><td>O</td><td>-1.34408</td><td>-0.25633</td><td>1.51021</td></tr> <tr><td>C</td><td>-0.23328</td><td>0.12051</td><td>-0.60279</td></tr> <tr><td>C</td><td>-1.53979</td><td>0.54955</td><td>-1.31001</td></tr> <tr><td>C</td><td>-2.22679</td><td>1.83468</td><td>-0.85093</td></tr> <tr><td>O</td><td>-2.52307</td><td>-0.51022</td><td>-1.30331</td></tr> <tr><td>C</td><td>-3.49798</td><td>2.14658</td><td>-1.36106</td></tr> <tr><td>C</td><td>-1.61141</td><td>2.76440</td><td>-0.00479</td></tr> <tr><td>C</td><td>-4.13790</td><td>3.33872</td><td>-1.02417</td></tr> <tr><td>C</td><td>-2.24708</td><td>3.96303</td><td>0.33280</td></tr> <tr><td>C</td><td>-3.51387</td><td>4.25460</td><td>-0.17241</td></tr> <tr><td>H</td><td>-0.28224</td><td>-1.20059</td><td>-1.02589</td></tr> <tr><td>O</td><td>0.83803</td><td>0.26804</td><td>1.50222</td></tr> <tr><td>C</td><td>0.82942</td><td>0.07519</td><td>2.92173</td></tr> <tr><td>C</td><td>1.04789</td><td>1.21474</td><td>-2.59518</td></tr> </table> | C        | 6.79934  | 0.81068 | 1.13739 | O | 5.88474 | 1.62419 | 1.12891 | O | 6.72512 | -0.40951 | 0.61603 | C | 3.66395 | -1.83800 | -1.13562 | C | 2.38732 | -1.44322 | -1.45671 | N | 4.29565 | -0.80998 | -0.45825 | C | 3.41228 | 0.17338 | -0.37643 | N | 2.23807 | -0.15923 | -0.95981 | C | 8.15577 | 1.08857 | 1.75246 | C | 4.34724 | -3.13913 | -1.42145 | C | 1.07683 | 0.75292 | -1.12806 | C | -0.33763 | 0.03579 | 0.85098 | O | -1.34408 | -0.25633 | 1.51021 | C | -0.23328 | 0.12051 | -0.60279 | C | -1.53979 | 0.54955 | -1.31001 | C | -2.22679 | 1.83468 | -0.85093 | O | -2.52307 | -0.51022 | -1.30331 | C | -3.49798 | 2.14658 | -1.36106 | C | -1.61141 | 2.76440 | -0.00479 | C | -4.13790 | 3.33872 | -1.02417 | C | -2.24708 | 3.96303 | 0.33280 | C | -3.51387 | 4.25460 | -0.17241 | H | -0.28224 | -1.20059 | -1.02589 | O | 0.83803 | 0.26804 | 1.50222 | C | 0.82942 | 0.07519 | 2.92173 | C | 1.04789 | 1.21474 | -2.59518 |
| C                                              | 6.79934                                                                                                                                                                                                                                                                                                                                                                                                                                                                                                                                                                                                                                                                                                                                                                                                                                                                                                                                                                                                                                                                                                                                                                                                                                                                                                                                                                                                                                                                                                                                                                                                                                                                                                                                                                                                                                                                                                                                                                     | 0.81068  | 1.13739  |         |         |   |         |         |         |   |         |          |         |   |         |          |          |   |         |          |          |   |         |          |          |   |         |         |          |   |         |          |          |   |         |         |         |   |         |          |          |   |         |         |          |   |          |         |         |   |          |          |         |   |          |         |          |   |          |         |          |   |          |         |          |   |          |          |          |   |          |         |          |   |          |         |          |   |          |         |          |   |          |         |         |   |          |         |          |   |          |          |          |   |         |         |         |   |         |         |         |   |         |         |          |
| O                                              | 5.88474                                                                                                                                                                                                                                                                                                                                                                                                                                                                                                                                                                                                                                                                                                                                                                                                                                                                                                                                                                                                                                                                                                                                                                                                                                                                                                                                                                                                                                                                                                                                                                                                                                                                                                                                                                                                                                                                                                                                                                     | 1.62419  | 1.12891  |         |         |   |         |         |         |   |         |          |         |   |         |          |          |   |         |          |          |   |         |          |          |   |         |         |          |   |         |          |          |   |         |         |         |   |         |          |          |   |         |         |          |   |          |         |         |   |          |          |         |   |          |         |          |   |          |         |          |   |          |         |          |   |          |          |          |   |          |         |          |   |          |         |          |   |          |         |          |   |          |         |         |   |          |         |          |   |          |          |          |   |         |         |         |   |         |         |         |   |         |         |          |
| O                                              | 6.72512                                                                                                                                                                                                                                                                                                                                                                                                                                                                                                                                                                                                                                                                                                                                                                                                                                                                                                                                                                                                                                                                                                                                                                                                                                                                                                                                                                                                                                                                                                                                                                                                                                                                                                                                                                                                                                                                                                                                                                     | -0.40951 | 0.61603  |         |         |   |         |         |         |   |         |          |         |   |         |          |          |   |         |          |          |   |         |          |          |   |         |         |          |   |         |          |          |   |         |         |         |   |         |          |          |   |         |         |          |   |          |         |         |   |          |          |         |   |          |         |          |   |          |         |          |   |          |         |          |   |          |          |          |   |          |         |          |   |          |         |          |   |          |         |          |   |          |         |         |   |          |         |          |   |          |          |          |   |         |         |         |   |         |         |         |   |         |         |          |
| C                                              | 3.66395                                                                                                                                                                                                                                                                                                                                                                                                                                                                                                                                                                                                                                                                                                                                                                                                                                                                                                                                                                                                                                                                                                                                                                                                                                                                                                                                                                                                                                                                                                                                                                                                                                                                                                                                                                                                                                                                                                                                                                     | -1.83800 | -1.13562 |         |         |   |         |         |         |   |         |          |         |   |         |          |          |   |         |          |          |   |         |          |          |   |         |         |          |   |         |          |          |   |         |         |         |   |         |          |          |   |         |         |          |   |          |         |         |   |          |          |         |   |          |         |          |   |          |         |          |   |          |         |          |   |          |          |          |   |          |         |          |   |          |         |          |   |          |         |          |   |          |         |         |   |          |         |          |   |          |          |          |   |         |         |         |   |         |         |         |   |         |         |          |
| C                                              | 2.38732                                                                                                                                                                                                                                                                                                                                                                                                                                                                                                                                                                                                                                                                                                                                                                                                                                                                                                                                                                                                                                                                                                                                                                                                                                                                                                                                                                                                                                                                                                                                                                                                                                                                                                                                                                                                                                                                                                                                                                     | -1.44322 | -1.45671 |         |         |   |         |         |         |   |         |          |         |   |         |          |          |   |         |          |          |   |         |          |          |   |         |         |          |   |         |          |          |   |         |         |         |   |         |          |          |   |         |         |          |   |          |         |         |   |          |          |         |   |          |         |          |   |          |         |          |   |          |         |          |   |          |          |          |   |          |         |          |   |          |         |          |   |          |         |          |   |          |         |         |   |          |         |          |   |          |          |          |   |         |         |         |   |         |         |         |   |         |         |          |
| N                                              | 4.29565                                                                                                                                                                                                                                                                                                                                                                                                                                                                                                                                                                                                                                                                                                                                                                                                                                                                                                                                                                                                                                                                                                                                                                                                                                                                                                                                                                                                                                                                                                                                                                                                                                                                                                                                                                                                                                                                                                                                                                     | -0.80998 | -0.45825 |         |         |   |         |         |         |   |         |          |         |   |         |          |          |   |         |          |          |   |         |          |          |   |         |         |          |   |         |          |          |   |         |         |         |   |         |          |          |   |         |         |          |   |          |         |         |   |          |          |         |   |          |         |          |   |          |         |          |   |          |         |          |   |          |          |          |   |          |         |          |   |          |         |          |   |          |         |          |   |          |         |         |   |          |         |          |   |          |          |          |   |         |         |         |   |         |         |         |   |         |         |          |
| C                                              | 3.41228                                                                                                                                                                                                                                                                                                                                                                                                                                                                                                                                                                                                                                                                                                                                                                                                                                                                                                                                                                                                                                                                                                                                                                                                                                                                                                                                                                                                                                                                                                                                                                                                                                                                                                                                                                                                                                                                                                                                                                     | 0.17338  | -0.37643 |         |         |   |         |         |         |   |         |          |         |   |         |          |          |   |         |          |          |   |         |          |          |   |         |         |          |   |         |          |          |   |         |         |         |   |         |          |          |   |         |         |          |   |          |         |         |   |          |          |         |   |          |         |          |   |          |         |          |   |          |         |          |   |          |          |          |   |          |         |          |   |          |         |          |   |          |         |          |   |          |         |         |   |          |         |          |   |          |          |          |   |         |         |         |   |         |         |         |   |         |         |          |
| N                                              | 2.23807                                                                                                                                                                                                                                                                                                                                                                                                                                                                                                                                                                                                                                                                                                                                                                                                                                                                                                                                                                                                                                                                                                                                                                                                                                                                                                                                                                                                                                                                                                                                                                                                                                                                                                                                                                                                                                                                                                                                                                     | -0.15923 | -0.95981 |         |         |   |         |         |         |   |         |          |         |   |         |          |          |   |         |          |          |   |         |          |          |   |         |         |          |   |         |          |          |   |         |         |         |   |         |          |          |   |         |         |          |   |          |         |         |   |          |          |         |   |          |         |          |   |          |         |          |   |          |         |          |   |          |          |          |   |          |         |          |   |          |         |          |   |          |         |          |   |          |         |         |   |          |         |          |   |          |          |          |   |         |         |         |   |         |         |         |   |         |         |          |
| C                                              | 8.15577                                                                                                                                                                                                                                                                                                                                                                                                                                                                                                                                                                                                                                                                                                                                                                                                                                                                                                                                                                                                                                                                                                                                                                                                                                                                                                                                                                                                                                                                                                                                                                                                                                                                                                                                                                                                                                                                                                                                                                     | 1.08857  | 1.75246  |         |         |   |         |         |         |   |         |          |         |   |         |          |          |   |         |          |          |   |         |          |          |   |         |         |          |   |         |          |          |   |         |         |         |   |         |          |          |   |         |         |          |   |          |         |         |   |          |          |         |   |          |         |          |   |          |         |          |   |          |         |          |   |          |          |          |   |          |         |          |   |          |         |          |   |          |         |          |   |          |         |         |   |          |         |          |   |          |          |          |   |         |         |         |   |         |         |         |   |         |         |          |
| C                                              | 4.34724                                                                                                                                                                                                                                                                                                                                                                                                                                                                                                                                                                                                                                                                                                                                                                                                                                                                                                                                                                                                                                                                                                                                                                                                                                                                                                                                                                                                                                                                                                                                                                                                                                                                                                                                                                                                                                                                                                                                                                     | -3.13913 | -1.42145 |         |         |   |         |         |         |   |         |          |         |   |         |          |          |   |         |          |          |   |         |          |          |   |         |         |          |   |         |          |          |   |         |         |         |   |         |          |          |   |         |         |          |   |          |         |         |   |          |          |         |   |          |         |          |   |          |         |          |   |          |         |          |   |          |          |          |   |          |         |          |   |          |         |          |   |          |         |          |   |          |         |         |   |          |         |          |   |          |          |          |   |         |         |         |   |         |         |         |   |         |         |          |
| C                                              | 1.07683                                                                                                                                                                                                                                                                                                                                                                                                                                                                                                                                                                                                                                                                                                                                                                                                                                                                                                                                                                                                                                                                                                                                                                                                                                                                                                                                                                                                                                                                                                                                                                                                                                                                                                                                                                                                                                                                                                                                                                     | 0.75292  | -1.12806 |         |         |   |         |         |         |   |         |          |         |   |         |          |          |   |         |          |          |   |         |          |          |   |         |         |          |   |         |          |          |   |         |         |         |   |         |          |          |   |         |         |          |   |          |         |         |   |          |          |         |   |          |         |          |   |          |         |          |   |          |         |          |   |          |          |          |   |          |         |          |   |          |         |          |   |          |         |          |   |          |         |         |   |          |         |          |   |          |          |          |   |         |         |         |   |         |         |         |   |         |         |          |
| C                                              | -0.33763                                                                                                                                                                                                                                                                                                                                                                                                                                                                                                                                                                                                                                                                                                                                                                                                                                                                                                                                                                                                                                                                                                                                                                                                                                                                                                                                                                                                                                                                                                                                                                                                                                                                                                                                                                                                                                                                                                                                                                    | 0.03579  | 0.85098  |         |         |   |         |         |         |   |         |          |         |   |         |          |          |   |         |          |          |   |         |          |          |   |         |         |          |   |         |          |          |   |         |         |         |   |         |          |          |   |         |         |          |   |          |         |         |   |          |          |         |   |          |         |          |   |          |         |          |   |          |         |          |   |          |          |          |   |          |         |          |   |          |         |          |   |          |         |          |   |          |         |         |   |          |         |          |   |          |          |          |   |         |         |         |   |         |         |         |   |         |         |          |
| O                                              | -1.34408                                                                                                                                                                                                                                                                                                                                                                                                                                                                                                                                                                                                                                                                                                                                                                                                                                                                                                                                                                                                                                                                                                                                                                                                                                                                                                                                                                                                                                                                                                                                                                                                                                                                                                                                                                                                                                                                                                                                                                    | -0.25633 | 1.51021  |         |         |   |         |         |         |   |         |          |         |   |         |          |          |   |         |          |          |   |         |          |          |   |         |         |          |   |         |          |          |   |         |         |         |   |         |          |          |   |         |         |          |   |          |         |         |   |          |          |         |   |          |         |          |   |          |         |          |   |          |         |          |   |          |          |          |   |          |         |          |   |          |         |          |   |          |         |          |   |          |         |         |   |          |         |          |   |          |          |          |   |         |         |         |   |         |         |         |   |         |         |          |
| C                                              | -0.23328                                                                                                                                                                                                                                                                                                                                                                                                                                                                                                                                                                                                                                                                                                                                                                                                                                                                                                                                                                                                                                                                                                                                                                                                                                                                                                                                                                                                                                                                                                                                                                                                                                                                                                                                                                                                                                                                                                                                                                    | 0.12051  | -0.60279 |         |         |   |         |         |         |   |         |          |         |   |         |          |          |   |         |          |          |   |         |          |          |   |         |         |          |   |         |          |          |   |         |         |         |   |         |          |          |   |         |         |          |   |          |         |         |   |          |          |         |   |          |         |          |   |          |         |          |   |          |         |          |   |          |          |          |   |          |         |          |   |          |         |          |   |          |         |          |   |          |         |         |   |          |         |          |   |          |          |          |   |         |         |         |   |         |         |         |   |         |         |          |
| C                                              | -1.53979                                                                                                                                                                                                                                                                                                                                                                                                                                                                                                                                                                                                                                                                                                                                                                                                                                                                                                                                                                                                                                                                                                                                                                                                                                                                                                                                                                                                                                                                                                                                                                                                                                                                                                                                                                                                                                                                                                                                                                    | 0.54955  | -1.31001 |         |         |   |         |         |         |   |         |          |         |   |         |          |          |   |         |          |          |   |         |          |          |   |         |         |          |   |         |          |          |   |         |         |         |   |         |          |          |   |         |         |          |   |          |         |         |   |          |          |         |   |          |         |          |   |          |         |          |   |          |         |          |   |          |          |          |   |          |         |          |   |          |         |          |   |          |         |          |   |          |         |         |   |          |         |          |   |          |          |          |   |         |         |         |   |         |         |         |   |         |         |          |
| C                                              | -2.22679                                                                                                                                                                                                                                                                                                                                                                                                                                                                                                                                                                                                                                                                                                                                                                                                                                                                                                                                                                                                                                                                                                                                                                                                                                                                                                                                                                                                                                                                                                                                                                                                                                                                                                                                                                                                                                                                                                                                                                    | 1.83468  | -0.85093 |         |         |   |         |         |         |   |         |          |         |   |         |          |          |   |         |          |          |   |         |          |          |   |         |         |          |   |         |          |          |   |         |         |         |   |         |          |          |   |         |         |          |   |          |         |         |   |          |          |         |   |          |         |          |   |          |         |          |   |          |         |          |   |          |          |          |   |          |         |          |   |          |         |          |   |          |         |          |   |          |         |         |   |          |         |          |   |          |          |          |   |         |         |         |   |         |         |         |   |         |         |          |
| O                                              | -2.52307                                                                                                                                                                                                                                                                                                                                                                                                                                                                                                                                                                                                                                                                                                                                                                                                                                                                                                                                                                                                                                                                                                                                                                                                                                                                                                                                                                                                                                                                                                                                                                                                                                                                                                                                                                                                                                                                                                                                                                    | -0.51022 | -1.30331 |         |         |   |         |         |         |   |         |          |         |   |         |          |          |   |         |          |          |   |         |          |          |   |         |         |          |   |         |          |          |   |         |         |         |   |         |          |          |   |         |         |          |   |          |         |         |   |          |          |         |   |          |         |          |   |          |         |          |   |          |         |          |   |          |          |          |   |          |         |          |   |          |         |          |   |          |         |          |   |          |         |         |   |          |         |          |   |          |          |          |   |         |         |         |   |         |         |         |   |         |         |          |
| C                                              | -3.49798                                                                                                                                                                                                                                                                                                                                                                                                                                                                                                                                                                                                                                                                                                                                                                                                                                                                                                                                                                                                                                                                                                                                                                                                                                                                                                                                                                                                                                                                                                                                                                                                                                                                                                                                                                                                                                                                                                                                                                    | 2.14658  | -1.36106 |         |         |   |         |         |         |   |         |          |         |   |         |          |          |   |         |          |          |   |         |          |          |   |         |         |          |   |         |          |          |   |         |         |         |   |         |          |          |   |         |         |          |   |          |         |         |   |          |          |         |   |          |         |          |   |          |         |          |   |          |         |          |   |          |          |          |   |          |         |          |   |          |         |          |   |          |         |          |   |          |         |         |   |          |         |          |   |          |          |          |   |         |         |         |   |         |         |         |   |         |         |          |
| C                                              | -1.61141                                                                                                                                                                                                                                                                                                                                                                                                                                                                                                                                                                                                                                                                                                                                                                                                                                                                                                                                                                                                                                                                                                                                                                                                                                                                                                                                                                                                                                                                                                                                                                                                                                                                                                                                                                                                                                                                                                                                                                    | 2.76440  | -0.00479 |         |         |   |         |         |         |   |         |          |         |   |         |          |          |   |         |          |          |   |         |          |          |   |         |         |          |   |         |          |          |   |         |         |         |   |         |          |          |   |         |         |          |   |          |         |         |   |          |          |         |   |          |         |          |   |          |         |          |   |          |         |          |   |          |          |          |   |          |         |          |   |          |         |          |   |          |         |          |   |          |         |         |   |          |         |          |   |          |          |          |   |         |         |         |   |         |         |         |   |         |         |          |
| C                                              | -4.13790                                                                                                                                                                                                                                                                                                                                                                                                                                                                                                                                                                                                                                                                                                                                                                                                                                                                                                                                                                                                                                                                                                                                                                                                                                                                                                                                                                                                                                                                                                                                                                                                                                                                                                                                                                                                                                                                                                                                                                    | 3.33872  | -1.02417 |         |         |   |         |         |         |   |         |          |         |   |         |          |          |   |         |          |          |   |         |          |          |   |         |         |          |   |         |          |          |   |         |         |         |   |         |          |          |   |         |         |          |   |          |         |         |   |          |          |         |   |          |         |          |   |          |         |          |   |          |         |          |   |          |          |          |   |          |         |          |   |          |         |          |   |          |         |          |   |          |         |         |   |          |         |          |   |          |          |          |   |         |         |         |   |         |         |         |   |         |         |          |
| C                                              | -2.24708                                                                                                                                                                                                                                                                                                                                                                                                                                                                                                                                                                                                                                                                                                                                                                                                                                                                                                                                                                                                                                                                                                                                                                                                                                                                                                                                                                                                                                                                                                                                                                                                                                                                                                                                                                                                                                                                                                                                                                    | 3.96303  | 0.33280  |         |         |   |         |         |         |   |         |          |         |   |         |          |          |   |         |          |          |   |         |          |          |   |         |         |          |   |         |          |          |   |         |         |         |   |         |          |          |   |         |         |          |   |          |         |         |   |          |          |         |   |          |         |          |   |          |         |          |   |          |         |          |   |          |          |          |   |          |         |          |   |          |         |          |   |          |         |          |   |          |         |         |   |          |         |          |   |          |          |          |   |         |         |         |   |         |         |         |   |         |         |          |
| C                                              | -3.51387                                                                                                                                                                                                                                                                                                                                                                                                                                                                                                                                                                                                                                                                                                                                                                                                                                                                                                                                                                                                                                                                                                                                                                                                                                                                                                                                                                                                                                                                                                                                                                                                                                                                                                                                                                                                                                                                                                                                                                    | 4.25460  | -0.17241 |         |         |   |         |         |         |   |         |          |         |   |         |          |          |   |         |          |          |   |         |          |          |   |         |         |          |   |         |          |          |   |         |         |         |   |         |          |          |   |         |         |          |   |          |         |         |   |          |          |         |   |          |         |          |   |          |         |          |   |          |         |          |   |          |          |          |   |          |         |          |   |          |         |          |   |          |         |          |   |          |         |         |   |          |         |          |   |          |          |          |   |         |         |         |   |         |         |         |   |         |         |          |
| H                                              | -0.28224                                                                                                                                                                                                                                                                                                                                                                                                                                                                                                                                                                                                                                                                                                                                                                                                                                                                                                                                                                                                                                                                                                                                                                                                                                                                                                                                                                                                                                                                                                                                                                                                                                                                                                                                                                                                                                                                                                                                                                    | -1.20059 | -1.02589 |         |         |   |         |         |         |   |         |          |         |   |         |          |          |   |         |          |          |   |         |          |          |   |         |         |          |   |         |          |          |   |         |         |         |   |         |          |          |   |         |         |          |   |          |         |         |   |          |          |         |   |          |         |          |   |          |         |          |   |          |         |          |   |          |          |          |   |          |         |          |   |          |         |          |   |          |         |          |   |          |         |         |   |          |         |          |   |          |          |          |   |         |         |         |   |         |         |         |   |         |         |          |
| O                                              | 0.83803                                                                                                                                                                                                                                                                                                                                                                                                                                                                                                                                                                                                                                                                                                                                                                                                                                                                                                                                                                                                                                                                                                                                                                                                                                                                                                                                                                                                                                                                                                                                                                                                                                                                                                                                                                                                                                                                                                                                                                     | 0.26804  | 1.50222  |         |         |   |         |         |         |   |         |          |         |   |         |          |          |   |         |          |          |   |         |          |          |   |         |         |          |   |         |          |          |   |         |         |         |   |         |          |          |   |         |         |          |   |          |         |         |   |          |          |         |   |          |         |          |   |          |         |          |   |          |         |          |   |          |          |          |   |          |         |          |   |          |         |          |   |          |         |          |   |          |         |         |   |          |         |          |   |          |          |          |   |         |         |         |   |         |         |         |   |         |         |          |
| C                                              | 0.82942                                                                                                                                                                                                                                                                                                                                                                                                                                                                                                                                                                                                                                                                                                                                                                                                                                                                                                                                                                                                                                                                                                                                                                                                                                                                                                                                                                                                                                                                                                                                                                                                                                                                                                                                                                                                                                                                                                                                                                     | 0.07519  | 2.92173  |         |         |   |         |         |         |   |         |          |         |   |         |          |          |   |         |          |          |   |         |          |          |   |         |         |          |   |         |          |          |   |         |         |         |   |         |          |          |   |         |         |          |   |          |         |         |   |          |          |         |   |          |         |          |   |          |         |          |   |          |         |          |   |          |          |          |   |          |         |          |   |          |         |          |   |          |         |          |   |          |         |         |   |          |         |          |   |          |          |          |   |         |         |         |   |         |         |         |   |         |         |          |
| C                                              | 1.04789                                                                                                                                                                                                                                                                                                                                                                                                                                                                                                                                                                                                                                                                                                                                                                                                                                                                                                                                                                                                                                                                                                                                                                                                                                                                                                                                                                                                                                                                                                                                                                                                                                                                                                                                                                                                                                                                                                                                                                     | 1.21474  | -2.59518 |         |         |   |         |         |         |   |         |          |         |   |         |          |          |   |         |          |          |   |         |          |          |   |         |         |          |   |         |          |          |   |         |         |         |   |         |          |          |   |         |         |          |   |          |         |         |   |          |          |         |   |          |         |          |   |          |         |          |   |          |         |          |   |          |          |          |   |          |         |          |   |          |         |          |   |          |         |          |   |          |         |         |   |          |         |          |   |          |          |          |   |         |         |         |   |         |         |         |   |         |         |          |

|   |          |          |          |
|---|----------|----------|----------|
| N | -4.95392 | -1.01456 | -0.13772 |
| N | -3.80872 | -1.43376 | 1.82034  |
| H | -1.74822 | 4.66635  | 0.99474  |
| H | -4.00897 | 5.18583  | 0.09020  |
| H | -5.12245 | 3.55648  | -1.43108 |
| H | -3.98385 | 1.44405  | -2.03182 |
| H | -0.62753 | 2.55711  | 0.40393  |
| H | 0.34674  | 2.04322  | -2.73389 |
| H | 0.76809  | 0.40189  | -3.27374 |
| H | 2.04408  | 1.56763  | -2.88040 |
| H | -1.27932 | 0.70798  | -2.36351 |
| H | 1.35255  | 1.62409  | -0.52231 |
| H | 1.56624  | -1.95635 | -1.93759 |
| H | 5.24705  | -2.99431 | -2.03248 |
| H | 4.66217  | -3.63907 | -0.49693 |
| H | 3.67869  | -3.81709 | -1.96088 |
| H | 3.59729  | 1.12344  | 0.10339  |
| H | -4.05797 | -0.73611 | -0.58196 |
| H | -2.95505 | -0.99024 | 1.44757  |
| H | 8.36214  | 0.36240  | 2.54605  |
| H | 1.85061  | 0.27532  | 3.24871  |
| H | 0.13356  | 0.76553  | 3.40681  |
| H | 8.94019  | 0.97453  | 0.99673  |
| H | 0.54606  | -0.95064 | 3.17390  |
| H | 8.18209  | 2.09930  | 2.16207  |
| O | -0.64894 | -2.28005 | -1.56315 |
| H | -2.00055 | -1.34849 | -1.50704 |
| C | -0.64004 | -3.29901 | -0.59432 |
| H | 0.37247  | -3.47989 | -0.19233 |
| H | -0.98666 | -4.24868 | -1.03342 |
| H | -1.29602 | -3.07902 | 0.26724  |
| H | 5.79506  | -0.56757 | 0.20589  |
| H | -3.84139 | -1.54567 | 2.82380  |
| H | -5.75164 | -1.18612 | -0.73064 |
| C | -4.95210 | -1.44002 | 1.12510  |
| N | -6.08764 | -1.87198 | 1.70580  |
| H | -6.01180 | -2.27859 | 2.62684  |
| C | -7.37684 | -1.94717 | 1.03071  |
| H | -8.12747 | -2.23709 | 1.76617  |
| H | -7.37592 | -2.69199 | 0.22544  |
| H | -7.65845 | -0.97070 | 0.62313  |

Optimized Molecular Properties for TArg-TS3-2

|                                                |                                                                                                                                                                                                                                                                                                                                                                                                                                                                                                                                                                                                                                                                                                                                                                                                                                                                                                                                                                                                                                                                                                                                                                                                                                                                                                                                                                                                                                                                                                                                                                                                                                                                                                                                                                                                                                                                                                                                                                                                                                                                                                                                                                                                   |          |          |   |         |          |          |   |         |          |          |   |         |          |          |   |         |         |         |   |         |         |         |   |         |          |         |   |         |          |         |   |         |          |         |   |         |          |          |   |         |         |         |   |         |          |         |   |          |          |          |   |          |          |          |   |          |          |         |   |          |          |         |   |          |          |         |   |          |         |          |   |          |          |          |   |          |          |         |   |          |          |          |   |          |          |         |   |          |          |         |   |          |         |         |   |         |          |          |   |         |          |          |   |          |          |         |   |         |         |         |   |          |         |          |   |          |          |         |
|------------------------------------------------|---------------------------------------------------------------------------------------------------------------------------------------------------------------------------------------------------------------------------------------------------------------------------------------------------------------------------------------------------------------------------------------------------------------------------------------------------------------------------------------------------------------------------------------------------------------------------------------------------------------------------------------------------------------------------------------------------------------------------------------------------------------------------------------------------------------------------------------------------------------------------------------------------------------------------------------------------------------------------------------------------------------------------------------------------------------------------------------------------------------------------------------------------------------------------------------------------------------------------------------------------------------------------------------------------------------------------------------------------------------------------------------------------------------------------------------------------------------------------------------------------------------------------------------------------------------------------------------------------------------------------------------------------------------------------------------------------------------------------------------------------------------------------------------------------------------------------------------------------------------------------------------------------------------------------------------------------------------------------------------------------------------------------------------------------------------------------------------------------------------------------------------------------------------------------------------------------|----------|----------|---|---------|----------|----------|---|---------|----------|----------|---|---------|----------|----------|---|---------|---------|---------|---|---------|---------|---------|---|---------|----------|---------|---|---------|----------|---------|---|---------|----------|---------|---|---------|----------|----------|---|---------|---------|---------|---|---------|----------|---------|---|----------|----------|----------|---|----------|----------|----------|---|----------|----------|---------|---|----------|----------|---------|---|----------|----------|---------|---|----------|---------|----------|---|----------|----------|----------|---|----------|----------|---------|---|----------|----------|----------|---|----------|----------|---------|---|----------|----------|---------|---|----------|---------|---------|---|---------|----------|----------|---|---------|----------|----------|---|----------|----------|---------|---|---------|---------|---------|---|----------|---------|----------|---|----------|----------|---------|
| Number of<br>(-)<br>Vibrational<br>Frequencies | 0 (-1280.874)                                                                                                                                                                                                                                                                                                                                                                                                                                                                                                                                                                                                                                                                                                                                                                                                                                                                                                                                                                                                                                                                                                                                                                                                                                                                                                                                                                                                                                                                                                                                                                                                                                                                                                                                                                                                                                                                                                                                                                                                                                                                                                                                                                                     |          |          |   |         |          |          |   |         |          |          |   |         |          |          |   |         |         |         |   |         |         |         |   |         |          |         |   |         |          |         |   |         |          |         |   |         |          |          |   |         |         |         |   |         |          |         |   |          |          |          |   |          |          |          |   |          |          |         |   |          |          |         |   |          |          |         |   |          |         |          |   |          |          |          |   |          |          |         |   |          |          |          |   |          |          |         |   |          |          |         |   |          |         |         |   |         |          |          |   |         |          |          |   |          |          |         |   |         |         |         |   |          |         |          |   |          |          |         |
| Absolute<br>Energies<br>(Hartrees)             | <p><b>B3LYP/6-31G(d) (PCM)</b></p> <p>There are 17 positive frequencies below 100 cm<sup>-1</sup>.</p> <p>Zero-point correction: 0.560951 hartree<br/>         Enthalpy correction: 0.599793 hartree<br/>         Free Energy correction: 0.487770 hartree<br/>         Quasiharmonic Free Energy correction: 0.500269 hartree</p> <p>SCF Energy: -1546.427312 hartree<br/>         SCF Energy + ZPVE: -1545.866361 hartree<br/>         Enthalpy: -1545.827519 hartree<br/>         Free Energy: -1545.939542 hartree</p> <p><b>B3LYP-D3/6-311+G(d,p) (PCM)</b></p> <p>SCF Done: E(RB3LYP) = -1546.98665916 A.U.</p>                                                                                                                                                                                                                                                                                                                                                                                                                                                                                                                                                                                                                                                                                                                                                                                                                                                                                                                                                                                                                                                                                                                                                                                                                                                                                                                                                                                                                                                                                                                                                                             |          |          |   |         |          |          |   |         |          |          |   |         |          |          |   |         |         |         |   |         |         |         |   |         |          |         |   |         |          |         |   |         |          |         |   |         |          |          |   |         |         |         |   |         |          |         |   |          |          |          |   |          |          |          |   |          |          |         |   |          |          |         |   |          |          |         |   |          |         |          |   |          |          |          |   |          |          |         |   |          |          |          |   |          |          |         |   |          |          |         |   |          |         |         |   |         |          |          |   |         |          |          |   |          |          |         |   |         |         |         |   |          |         |          |   |          |          |         |
| Cartesian<br>Coordinates                       | <p>(PCM)</p> <p>67</p> <p>spD3-TS3-arg-Targ.out Energy: -970748.7770396</p> <table> <tr><td>C</td><td>5.69135</td><td>-1.22862</td><td>-1.21286</td></tr> <tr><td>O</td><td>4.64456</td><td>-1.82969</td><td>-1.41686</td></tr> <tr><td>O</td><td>5.87922</td><td>-0.36129</td><td>-0.22183</td></tr> <tr><td>C</td><td>3.07262</td><td>0.78027</td><td>2.15989</td></tr> <tr><td>C</td><td>1.73892</td><td>0.49299</td><td>2.32929</td></tr> <tr><td>N</td><td>3.59006</td><td>-0.06484</td><td>1.19646</td></tr> <tr><td>C</td><td>2.58718</td><td>-0.83509</td><td>0.80330</td></tr> <tr><td>N</td><td>1.43786</td><td>-0.53984</td><td>1.45400</td></tr> <tr><td>C</td><td>6.92903</td><td>-1.39421</td><td>-2.06864</td></tr> <tr><td>C</td><td>3.91580</td><td>1.79805</td><td>2.86292</td></tr> <tr><td>C</td><td>0.11897</td><td>-1.20983</td><td>1.24230</td></tr> <tr><td>C</td><td>-0.47270</td><td>-0.73980</td><td>-1.19146</td></tr> <tr><td>O</td><td>-1.15378</td><td>-0.32060</td><td>-2.15599</td></tr> <tr><td>C</td><td>-0.75591</td><td>-0.47096</td><td>0.20355</td></tr> <tr><td>C</td><td>-2.25901</td><td>-0.34438</td><td>0.52065</td></tr> <tr><td>C</td><td>-3.08238</td><td>-1.64172</td><td>0.52825</td></tr> <tr><td>O</td><td>-2.91008</td><td>0.57720</td><td>-0.38314</td></tr> <tr><td>C</td><td>-2.65917</td><td>-2.83343</td><td>-0.07110</td></tr> <tr><td>C</td><td>-4.34973</td><td>-1.61627</td><td>1.13251</td></tr> <tr><td>C</td><td>-3.47892</td><td>-3.96657</td><td>-0.07208</td></tr> <tr><td>C</td><td>-5.17021</td><td>-2.74267</td><td>1.13632</td></tr> <tr><td>C</td><td>-4.73609</td><td>-3.92582</td><td>0.53026</td></tr> <tr><td>H</td><td>-0.27214</td><td>0.93454</td><td>0.13609</td></tr> <tr><td>O</td><td>0.69093</td><td>-1.39448</td><td>-1.42628</td></tr> <tr><td>C</td><td>1.14335</td><td>-1.46909</td><td>-2.78959</td></tr> <tr><td>C</td><td>-0.53041</td><td>-1.42560</td><td>2.61721</td></tr> <tr><td>N</td><td>0.14151</td><td>2.11822</td><td>0.08037</td></tr> <tr><td>N</td><td>-1.12235</td><td>2.77671</td><td>-1.76776</td></tr> <tr><td>H</td><td>-6.14635</td><td>-2.70032</td><td>1.61290</td></tr> </table> |          |          | C | 5.69135 | -1.22862 | -1.21286 | O | 4.64456 | -1.82969 | -1.41686 | O | 5.87922 | -0.36129 | -0.22183 | C | 3.07262 | 0.78027 | 2.15989 | C | 1.73892 | 0.49299 | 2.32929 | N | 3.59006 | -0.06484 | 1.19646 | C | 2.58718 | -0.83509 | 0.80330 | N | 1.43786 | -0.53984 | 1.45400 | C | 6.92903 | -1.39421 | -2.06864 | C | 3.91580 | 1.79805 | 2.86292 | C | 0.11897 | -1.20983 | 1.24230 | C | -0.47270 | -0.73980 | -1.19146 | O | -1.15378 | -0.32060 | -2.15599 | C | -0.75591 | -0.47096 | 0.20355 | C | -2.25901 | -0.34438 | 0.52065 | C | -3.08238 | -1.64172 | 0.52825 | O | -2.91008 | 0.57720 | -0.38314 | C | -2.65917 | -2.83343 | -0.07110 | C | -4.34973 | -1.61627 | 1.13251 | C | -3.47892 | -3.96657 | -0.07208 | C | -5.17021 | -2.74267 | 1.13632 | C | -4.73609 | -3.92582 | 0.53026 | H | -0.27214 | 0.93454 | 0.13609 | O | 0.69093 | -1.39448 | -1.42628 | C | 1.14335 | -1.46909 | -2.78959 | C | -0.53041 | -1.42560 | 2.61721 | N | 0.14151 | 2.11822 | 0.08037 | N | -1.12235 | 2.77671 | -1.76776 | H | -6.14635 | -2.70032 | 1.61290 |
| C                                              | 5.69135                                                                                                                                                                                                                                                                                                                                                                                                                                                                                                                                                                                                                                                                                                                                                                                                                                                                                                                                                                                                                                                                                                                                                                                                                                                                                                                                                                                                                                                                                                                                                                                                                                                                                                                                                                                                                                                                                                                                                                                                                                                                                                                                                                                           | -1.22862 | -1.21286 |   |         |          |          |   |         |          |          |   |         |          |          |   |         |         |         |   |         |         |         |   |         |          |         |   |         |          |         |   |         |          |         |   |         |          |          |   |         |         |         |   |         |          |         |   |          |          |          |   |          |          |          |   |          |          |         |   |          |          |         |   |          |          |         |   |          |         |          |   |          |          |          |   |          |          |         |   |          |          |          |   |          |          |         |   |          |          |         |   |          |         |         |   |         |          |          |   |         |          |          |   |          |          |         |   |         |         |         |   |          |         |          |   |          |          |         |
| O                                              | 4.64456                                                                                                                                                                                                                                                                                                                                                                                                                                                                                                                                                                                                                                                                                                                                                                                                                                                                                                                                                                                                                                                                                                                                                                                                                                                                                                                                                                                                                                                                                                                                                                                                                                                                                                                                                                                                                                                                                                                                                                                                                                                                                                                                                                                           | -1.82969 | -1.41686 |   |         |          |          |   |         |          |          |   |         |          |          |   |         |         |         |   |         |         |         |   |         |          |         |   |         |          |         |   |         |          |         |   |         |          |          |   |         |         |         |   |         |          |         |   |          |          |          |   |          |          |          |   |          |          |         |   |          |          |         |   |          |          |         |   |          |         |          |   |          |          |          |   |          |          |         |   |          |          |          |   |          |          |         |   |          |          |         |   |          |         |         |   |         |          |          |   |         |          |          |   |          |          |         |   |         |         |         |   |          |         |          |   |          |          |         |
| O                                              | 5.87922                                                                                                                                                                                                                                                                                                                                                                                                                                                                                                                                                                                                                                                                                                                                                                                                                                                                                                                                                                                                                                                                                                                                                                                                                                                                                                                                                                                                                                                                                                                                                                                                                                                                                                                                                                                                                                                                                                                                                                                                                                                                                                                                                                                           | -0.36129 | -0.22183 |   |         |          |          |   |         |          |          |   |         |          |          |   |         |         |         |   |         |         |         |   |         |          |         |   |         |          |         |   |         |          |         |   |         |          |          |   |         |         |         |   |         |          |         |   |          |          |          |   |          |          |          |   |          |          |         |   |          |          |         |   |          |          |         |   |          |         |          |   |          |          |          |   |          |          |         |   |          |          |          |   |          |          |         |   |          |          |         |   |          |         |         |   |         |          |          |   |         |          |          |   |          |          |         |   |         |         |         |   |          |         |          |   |          |          |         |
| C                                              | 3.07262                                                                                                                                                                                                                                                                                                                                                                                                                                                                                                                                                                                                                                                                                                                                                                                                                                                                                                                                                                                                                                                                                                                                                                                                                                                                                                                                                                                                                                                                                                                                                                                                                                                                                                                                                                                                                                                                                                                                                                                                                                                                                                                                                                                           | 0.78027  | 2.15989  |   |         |          |          |   |         |          |          |   |         |          |          |   |         |         |         |   |         |         |         |   |         |          |         |   |         |          |         |   |         |          |         |   |         |          |          |   |         |         |         |   |         |          |         |   |          |          |          |   |          |          |          |   |          |          |         |   |          |          |         |   |          |          |         |   |          |         |          |   |          |          |          |   |          |          |         |   |          |          |          |   |          |          |         |   |          |          |         |   |          |         |         |   |         |          |          |   |         |          |          |   |          |          |         |   |         |         |         |   |          |         |          |   |          |          |         |
| C                                              | 1.73892                                                                                                                                                                                                                                                                                                                                                                                                                                                                                                                                                                                                                                                                                                                                                                                                                                                                                                                                                                                                                                                                                                                                                                                                                                                                                                                                                                                                                                                                                                                                                                                                                                                                                                                                                                                                                                                                                                                                                                                                                                                                                                                                                                                           | 0.49299  | 2.32929  |   |         |          |          |   |         |          |          |   |         |          |          |   |         |         |         |   |         |         |         |   |         |          |         |   |         |          |         |   |         |          |         |   |         |          |          |   |         |         |         |   |         |          |         |   |          |          |          |   |          |          |          |   |          |          |         |   |          |          |         |   |          |          |         |   |          |         |          |   |          |          |          |   |          |          |         |   |          |          |          |   |          |          |         |   |          |          |         |   |          |         |         |   |         |          |          |   |         |          |          |   |          |          |         |   |         |         |         |   |          |         |          |   |          |          |         |
| N                                              | 3.59006                                                                                                                                                                                                                                                                                                                                                                                                                                                                                                                                                                                                                                                                                                                                                                                                                                                                                                                                                                                                                                                                                                                                                                                                                                                                                                                                                                                                                                                                                                                                                                                                                                                                                                                                                                                                                                                                                                                                                                                                                                                                                                                                                                                           | -0.06484 | 1.19646  |   |         |          |          |   |         |          |          |   |         |          |          |   |         |         |         |   |         |         |         |   |         |          |         |   |         |          |         |   |         |          |         |   |         |          |          |   |         |         |         |   |         |          |         |   |          |          |          |   |          |          |          |   |          |          |         |   |          |          |         |   |          |          |         |   |          |         |          |   |          |          |          |   |          |          |         |   |          |          |          |   |          |          |         |   |          |          |         |   |          |         |         |   |         |          |          |   |         |          |          |   |          |          |         |   |         |         |         |   |          |         |          |   |          |          |         |
| C                                              | 2.58718                                                                                                                                                                                                                                                                                                                                                                                                                                                                                                                                                                                                                                                                                                                                                                                                                                                                                                                                                                                                                                                                                                                                                                                                                                                                                                                                                                                                                                                                                                                                                                                                                                                                                                                                                                                                                                                                                                                                                                                                                                                                                                                                                                                           | -0.83509 | 0.80330  |   |         |          |          |   |         |          |          |   |         |          |          |   |         |         |         |   |         |         |         |   |         |          |         |   |         |          |         |   |         |          |         |   |         |          |          |   |         |         |         |   |         |          |         |   |          |          |          |   |          |          |          |   |          |          |         |   |          |          |         |   |          |          |         |   |          |         |          |   |          |          |          |   |          |          |         |   |          |          |          |   |          |          |         |   |          |          |         |   |          |         |         |   |         |          |          |   |         |          |          |   |          |          |         |   |         |         |         |   |          |         |          |   |          |          |         |
| N                                              | 1.43786                                                                                                                                                                                                                                                                                                                                                                                                                                                                                                                                                                                                                                                                                                                                                                                                                                                                                                                                                                                                                                                                                                                                                                                                                                                                                                                                                                                                                                                                                                                                                                                                                                                                                                                                                                                                                                                                                                                                                                                                                                                                                                                                                                                           | -0.53984 | 1.45400  |   |         |          |          |   |         |          |          |   |         |          |          |   |         |         |         |   |         |         |         |   |         |          |         |   |         |          |         |   |         |          |         |   |         |          |          |   |         |         |         |   |         |          |         |   |          |          |          |   |          |          |          |   |          |          |         |   |          |          |         |   |          |          |         |   |          |         |          |   |          |          |          |   |          |          |         |   |          |          |          |   |          |          |         |   |          |          |         |   |          |         |         |   |         |          |          |   |         |          |          |   |          |          |         |   |         |         |         |   |          |         |          |   |          |          |         |
| C                                              | 6.92903                                                                                                                                                                                                                                                                                                                                                                                                                                                                                                                                                                                                                                                                                                                                                                                                                                                                                                                                                                                                                                                                                                                                                                                                                                                                                                                                                                                                                                                                                                                                                                                                                                                                                                                                                                                                                                                                                                                                                                                                                                                                                                                                                                                           | -1.39421 | -2.06864 |   |         |          |          |   |         |          |          |   |         |          |          |   |         |         |         |   |         |         |         |   |         |          |         |   |         |          |         |   |         |          |         |   |         |          |          |   |         |         |         |   |         |          |         |   |          |          |          |   |          |          |          |   |          |          |         |   |          |          |         |   |          |          |         |   |          |         |          |   |          |          |          |   |          |          |         |   |          |          |          |   |          |          |         |   |          |          |         |   |          |         |         |   |         |          |          |   |         |          |          |   |          |          |         |   |         |         |         |   |          |         |          |   |          |          |         |
| C                                              | 3.91580                                                                                                                                                                                                                                                                                                                                                                                                                                                                                                                                                                                                                                                                                                                                                                                                                                                                                                                                                                                                                                                                                                                                                                                                                                                                                                                                                                                                                                                                                                                                                                                                                                                                                                                                                                                                                                                                                                                                                                                                                                                                                                                                                                                           | 1.79805  | 2.86292  |   |         |          |          |   |         |          |          |   |         |          |          |   |         |         |         |   |         |         |         |   |         |          |         |   |         |          |         |   |         |          |         |   |         |          |          |   |         |         |         |   |         |          |         |   |          |          |          |   |          |          |          |   |          |          |         |   |          |          |         |   |          |          |         |   |          |         |          |   |          |          |          |   |          |          |         |   |          |          |          |   |          |          |         |   |          |          |         |   |          |         |         |   |         |          |          |   |         |          |          |   |          |          |         |   |         |         |         |   |          |         |          |   |          |          |         |
| C                                              | 0.11897                                                                                                                                                                                                                                                                                                                                                                                                                                                                                                                                                                                                                                                                                                                                                                                                                                                                                                                                                                                                                                                                                                                                                                                                                                                                                                                                                                                                                                                                                                                                                                                                                                                                                                                                                                                                                                                                                                                                                                                                                                                                                                                                                                                           | -1.20983 | 1.24230  |   |         |          |          |   |         |          |          |   |         |          |          |   |         |         |         |   |         |         |         |   |         |          |         |   |         |          |         |   |         |          |         |   |         |          |          |   |         |         |         |   |         |          |         |   |          |          |          |   |          |          |          |   |          |          |         |   |          |          |         |   |          |          |         |   |          |         |          |   |          |          |          |   |          |          |         |   |          |          |          |   |          |          |         |   |          |          |         |   |          |         |         |   |         |          |          |   |         |          |          |   |          |          |         |   |         |         |         |   |          |         |          |   |          |          |         |
| C                                              | -0.47270                                                                                                                                                                                                                                                                                                                                                                                                                                                                                                                                                                                                                                                                                                                                                                                                                                                                                                                                                                                                                                                                                                                                                                                                                                                                                                                                                                                                                                                                                                                                                                                                                                                                                                                                                                                                                                                                                                                                                                                                                                                                                                                                                                                          | -0.73980 | -1.19146 |   |         |          |          |   |         |          |          |   |         |          |          |   |         |         |         |   |         |         |         |   |         |          |         |   |         |          |         |   |         |          |         |   |         |          |          |   |         |         |         |   |         |          |         |   |          |          |          |   |          |          |          |   |          |          |         |   |          |          |         |   |          |          |         |   |          |         |          |   |          |          |          |   |          |          |         |   |          |          |          |   |          |          |         |   |          |          |         |   |          |         |         |   |         |          |          |   |         |          |          |   |          |          |         |   |         |         |         |   |          |         |          |   |          |          |         |
| O                                              | -1.15378                                                                                                                                                                                                                                                                                                                                                                                                                                                                                                                                                                                                                                                                                                                                                                                                                                                                                                                                                                                                                                                                                                                                                                                                                                                                                                                                                                                                                                                                                                                                                                                                                                                                                                                                                                                                                                                                                                                                                                                                                                                                                                                                                                                          | -0.32060 | -2.15599 |   |         |          |          |   |         |          |          |   |         |          |          |   |         |         |         |   |         |         |         |   |         |          |         |   |         |          |         |   |         |          |         |   |         |          |          |   |         |         |         |   |         |          |         |   |          |          |          |   |          |          |          |   |          |          |         |   |          |          |         |   |          |          |         |   |          |         |          |   |          |          |          |   |          |          |         |   |          |          |          |   |          |          |         |   |          |          |         |   |          |         |         |   |         |          |          |   |         |          |          |   |          |          |         |   |         |         |         |   |          |         |          |   |          |          |         |
| C                                              | -0.75591                                                                                                                                                                                                                                                                                                                                                                                                                                                                                                                                                                                                                                                                                                                                                                                                                                                                                                                                                                                                                                                                                                                                                                                                                                                                                                                                                                                                                                                                                                                                                                                                                                                                                                                                                                                                                                                                                                                                                                                                                                                                                                                                                                                          | -0.47096 | 0.20355  |   |         |          |          |   |         |          |          |   |         |          |          |   |         |         |         |   |         |         |         |   |         |          |         |   |         |          |         |   |         |          |         |   |         |          |          |   |         |         |         |   |         |          |         |   |          |          |          |   |          |          |          |   |          |          |         |   |          |          |         |   |          |          |         |   |          |         |          |   |          |          |          |   |          |          |         |   |          |          |          |   |          |          |         |   |          |          |         |   |          |         |         |   |         |          |          |   |         |          |          |   |          |          |         |   |         |         |         |   |          |         |          |   |          |          |         |
| C                                              | -2.25901                                                                                                                                                                                                                                                                                                                                                                                                                                                                                                                                                                                                                                                                                                                                                                                                                                                                                                                                                                                                                                                                                                                                                                                                                                                                                                                                                                                                                                                                                                                                                                                                                                                                                                                                                                                                                                                                                                                                                                                                                                                                                                                                                                                          | -0.34438 | 0.52065  |   |         |          |          |   |         |          |          |   |         |          |          |   |         |         |         |   |         |         |         |   |         |          |         |   |         |          |         |   |         |          |         |   |         |          |          |   |         |         |         |   |         |          |         |   |          |          |          |   |          |          |          |   |          |          |         |   |          |          |         |   |          |          |         |   |          |         |          |   |          |          |          |   |          |          |         |   |          |          |          |   |          |          |         |   |          |          |         |   |          |         |         |   |         |          |          |   |         |          |          |   |          |          |         |   |         |         |         |   |          |         |          |   |          |          |         |
| C                                              | -3.08238                                                                                                                                                                                                                                                                                                                                                                                                                                                                                                                                                                                                                                                                                                                                                                                                                                                                                                                                                                                                                                                                                                                                                                                                                                                                                                                                                                                                                                                                                                                                                                                                                                                                                                                                                                                                                                                                                                                                                                                                                                                                                                                                                                                          | -1.64172 | 0.52825  |   |         |          |          |   |         |          |          |   |         |          |          |   |         |         |         |   |         |         |         |   |         |          |         |   |         |          |         |   |         |          |         |   |         |          |          |   |         |         |         |   |         |          |         |   |          |          |          |   |          |          |          |   |          |          |         |   |          |          |         |   |          |          |         |   |          |         |          |   |          |          |          |   |          |          |         |   |          |          |          |   |          |          |         |   |          |          |         |   |          |         |         |   |         |          |          |   |         |          |          |   |          |          |         |   |         |         |         |   |          |         |          |   |          |          |         |
| O                                              | -2.91008                                                                                                                                                                                                                                                                                                                                                                                                                                                                                                                                                                                                                                                                                                                                                                                                                                                                                                                                                                                                                                                                                                                                                                                                                                                                                                                                                                                                                                                                                                                                                                                                                                                                                                                                                                                                                                                                                                                                                                                                                                                                                                                                                                                          | 0.57720  | -0.38314 |   |         |          |          |   |         |          |          |   |         |          |          |   |         |         |         |   |         |         |         |   |         |          |         |   |         |          |         |   |         |          |         |   |         |          |          |   |         |         |         |   |         |          |         |   |          |          |          |   |          |          |          |   |          |          |         |   |          |          |         |   |          |          |         |   |          |         |          |   |          |          |          |   |          |          |         |   |          |          |          |   |          |          |         |   |          |          |         |   |          |         |         |   |         |          |          |   |         |          |          |   |          |          |         |   |         |         |         |   |          |         |          |   |          |          |         |
| C                                              | -2.65917                                                                                                                                                                                                                                                                                                                                                                                                                                                                                                                                                                                                                                                                                                                                                                                                                                                                                                                                                                                                                                                                                                                                                                                                                                                                                                                                                                                                                                                                                                                                                                                                                                                                                                                                                                                                                                                                                                                                                                                                                                                                                                                                                                                          | -2.83343 | -0.07110 |   |         |          |          |   |         |          |          |   |         |          |          |   |         |         |         |   |         |         |         |   |         |          |         |   |         |          |         |   |         |          |         |   |         |          |          |   |         |         |         |   |         |          |         |   |          |          |          |   |          |          |          |   |          |          |         |   |          |          |         |   |          |          |         |   |          |         |          |   |          |          |          |   |          |          |         |   |          |          |          |   |          |          |         |   |          |          |         |   |          |         |         |   |         |          |          |   |         |          |          |   |          |          |         |   |         |         |         |   |          |         |          |   |          |          |         |
| C                                              | -4.34973                                                                                                                                                                                                                                                                                                                                                                                                                                                                                                                                                                                                                                                                                                                                                                                                                                                                                                                                                                                                                                                                                                                                                                                                                                                                                                                                                                                                                                                                                                                                                                                                                                                                                                                                                                                                                                                                                                                                                                                                                                                                                                                                                                                          | -1.61627 | 1.13251  |   |         |          |          |   |         |          |          |   |         |          |          |   |         |         |         |   |         |         |         |   |         |          |         |   |         |          |         |   |         |          |         |   |         |          |          |   |         |         |         |   |         |          |         |   |          |          |          |   |          |          |          |   |          |          |         |   |          |          |         |   |          |          |         |   |          |         |          |   |          |          |          |   |          |          |         |   |          |          |          |   |          |          |         |   |          |          |         |   |          |         |         |   |         |          |          |   |         |          |          |   |          |          |         |   |         |         |         |   |          |         |          |   |          |          |         |
| C                                              | -3.47892                                                                                                                                                                                                                                                                                                                                                                                                                                                                                                                                                                                                                                                                                                                                                                                                                                                                                                                                                                                                                                                                                                                                                                                                                                                                                                                                                                                                                                                                                                                                                                                                                                                                                                                                                                                                                                                                                                                                                                                                                                                                                                                                                                                          | -3.96657 | -0.07208 |   |         |          |          |   |         |          |          |   |         |          |          |   |         |         |         |   |         |         |         |   |         |          |         |   |         |          |         |   |         |          |         |   |         |          |          |   |         |         |         |   |         |          |         |   |          |          |          |   |          |          |          |   |          |          |         |   |          |          |         |   |          |          |         |   |          |         |          |   |          |          |          |   |          |          |         |   |          |          |          |   |          |          |         |   |          |          |         |   |          |         |         |   |         |          |          |   |         |          |          |   |          |          |         |   |         |         |         |   |          |         |          |   |          |          |         |
| C                                              | -5.17021                                                                                                                                                                                                                                                                                                                                                                                                                                                                                                                                                                                                                                                                                                                                                                                                                                                                                                                                                                                                                                                                                                                                                                                                                                                                                                                                                                                                                                                                                                                                                                                                                                                                                                                                                                                                                                                                                                                                                                                                                                                                                                                                                                                          | -2.74267 | 1.13632  |   |         |          |          |   |         |          |          |   |         |          |          |   |         |         |         |   |         |         |         |   |         |          |         |   |         |          |         |   |         |          |         |   |         |          |          |   |         |         |         |   |         |          |         |   |          |          |          |   |          |          |          |   |          |          |         |   |          |          |         |   |          |          |         |   |          |         |          |   |          |          |          |   |          |          |         |   |          |          |          |   |          |          |         |   |          |          |         |   |          |         |         |   |         |          |          |   |         |          |          |   |          |          |         |   |         |         |         |   |          |         |          |   |          |          |         |
| C                                              | -4.73609                                                                                                                                                                                                                                                                                                                                                                                                                                                                                                                                                                                                                                                                                                                                                                                                                                                                                                                                                                                                                                                                                                                                                                                                                                                                                                                                                                                                                                                                                                                                                                                                                                                                                                                                                                                                                                                                                                                                                                                                                                                                                                                                                                                          | -3.92582 | 0.53026  |   |         |          |          |   |         |          |          |   |         |          |          |   |         |         |         |   |         |         |         |   |         |          |         |   |         |          |         |   |         |          |         |   |         |          |          |   |         |         |         |   |         |          |         |   |          |          |          |   |          |          |          |   |          |          |         |   |          |          |         |   |          |          |         |   |          |         |          |   |          |          |          |   |          |          |         |   |          |          |          |   |          |          |         |   |          |          |         |   |          |         |         |   |         |          |          |   |         |          |          |   |          |          |         |   |         |         |         |   |          |         |          |   |          |          |         |
| H                                              | -0.27214                                                                                                                                                                                                                                                                                                                                                                                                                                                                                                                                                                                                                                                                                                                                                                                                                                                                                                                                                                                                                                                                                                                                                                                                                                                                                                                                                                                                                                                                                                                                                                                                                                                                                                                                                                                                                                                                                                                                                                                                                                                                                                                                                                                          | 0.93454  | 0.13609  |   |         |          |          |   |         |          |          |   |         |          |          |   |         |         |         |   |         |         |         |   |         |          |         |   |         |          |         |   |         |          |         |   |         |          |          |   |         |         |         |   |         |          |         |   |          |          |          |   |          |          |          |   |          |          |         |   |          |          |         |   |          |          |         |   |          |         |          |   |          |          |          |   |          |          |         |   |          |          |          |   |          |          |         |   |          |          |         |   |          |         |         |   |         |          |          |   |         |          |          |   |          |          |         |   |         |         |         |   |          |         |          |   |          |          |         |
| O                                              | 0.69093                                                                                                                                                                                                                                                                                                                                                                                                                                                                                                                                                                                                                                                                                                                                                                                                                                                                                                                                                                                                                                                                                                                                                                                                                                                                                                                                                                                                                                                                                                                                                                                                                                                                                                                                                                                                                                                                                                                                                                                                                                                                                                                                                                                           | -1.39448 | -1.42628 |   |         |          |          |   |         |          |          |   |         |          |          |   |         |         |         |   |         |         |         |   |         |          |         |   |         |          |         |   |         |          |         |   |         |          |          |   |         |         |         |   |         |          |         |   |          |          |          |   |          |          |          |   |          |          |         |   |          |          |         |   |          |          |         |   |          |         |          |   |          |          |          |   |          |          |         |   |          |          |          |   |          |          |         |   |          |          |         |   |          |         |         |   |         |          |          |   |         |          |          |   |          |          |         |   |         |         |         |   |          |         |          |   |          |          |         |
| C                                              | 1.14335                                                                                                                                                                                                                                                                                                                                                                                                                                                                                                                                                                                                                                                                                                                                                                                                                                                                                                                                                                                                                                                                                                                                                                                                                                                                                                                                                                                                                                                                                                                                                                                                                                                                                                                                                                                                                                                                                                                                                                                                                                                                                                                                                                                           | -1.46909 | -2.78959 |   |         |          |          |   |         |          |          |   |         |          |          |   |         |         |         |   |         |         |         |   |         |          |         |   |         |          |         |   |         |          |         |   |         |          |          |   |         |         |         |   |         |          |         |   |          |          |          |   |          |          |          |   |          |          |         |   |          |          |         |   |          |          |         |   |          |         |          |   |          |          |          |   |          |          |         |   |          |          |          |   |          |          |         |   |          |          |         |   |          |         |         |   |         |          |          |   |         |          |          |   |          |          |         |   |         |         |         |   |          |         |          |   |          |          |         |
| C                                              | -0.53041                                                                                                                                                                                                                                                                                                                                                                                                                                                                                                                                                                                                                                                                                                                                                                                                                                                                                                                                                                                                                                                                                                                                                                                                                                                                                                                                                                                                                                                                                                                                                                                                                                                                                                                                                                                                                                                                                                                                                                                                                                                                                                                                                                                          | -1.42560 | 2.61721  |   |         |          |          |   |         |          |          |   |         |          |          |   |         |         |         |   |         |         |         |   |         |          |         |   |         |          |         |   |         |          |         |   |         |          |          |   |         |         |         |   |         |          |         |   |          |          |          |   |          |          |          |   |          |          |         |   |          |          |         |   |          |          |         |   |          |         |          |   |          |          |          |   |          |          |         |   |          |          |          |   |          |          |         |   |          |          |         |   |          |         |         |   |         |          |          |   |         |          |          |   |          |          |         |   |         |         |         |   |          |         |          |   |          |          |         |
| N                                              | 0.14151                                                                                                                                                                                                                                                                                                                                                                                                                                                                                                                                                                                                                                                                                                                                                                                                                                                                                                                                                                                                                                                                                                                                                                                                                                                                                                                                                                                                                                                                                                                                                                                                                                                                                                                                                                                                                                                                                                                                                                                                                                                                                                                                                                                           | 2.11822  | 0.08037  |   |         |          |          |   |         |          |          |   |         |          |          |   |         |         |         |   |         |         |         |   |         |          |         |   |         |          |         |   |         |          |         |   |         |          |          |   |         |         |         |   |         |          |         |   |          |          |          |   |          |          |          |   |          |          |         |   |          |          |         |   |          |          |         |   |          |         |          |   |          |          |          |   |          |          |         |   |          |          |          |   |          |          |         |   |          |          |         |   |          |         |         |   |         |          |          |   |         |          |          |   |          |          |         |   |         |         |         |   |          |         |          |   |          |          |         |
| N                                              | -1.12235                                                                                                                                                                                                                                                                                                                                                                                                                                                                                                                                                                                                                                                                                                                                                                                                                                                                                                                                                                                                                                                                                                                                                                                                                                                                                                                                                                                                                                                                                                                                                                                                                                                                                                                                                                                                                                                                                                                                                                                                                                                                                                                                                                                          | 2.77671  | -1.76776 |   |         |          |          |   |         |          |          |   |         |          |          |   |         |         |         |   |         |         |         |   |         |          |         |   |         |          |         |   |         |          |         |   |         |          |          |   |         |         |         |   |         |          |         |   |          |          |          |   |          |          |          |   |          |          |         |   |          |          |         |   |          |          |         |   |          |         |          |   |          |          |          |   |          |          |         |   |          |          |          |   |          |          |         |   |          |          |         |   |          |         |         |   |         |          |          |   |         |          |          |   |          |          |         |   |         |         |         |   |          |         |          |   |          |          |         |
| H                                              | -6.14635                                                                                                                                                                                                                                                                                                                                                                                                                                                                                                                                                                                                                                                                                                                                                                                                                                                                                                                                                                                                                                                                                                                                                                                                                                                                                                                                                                                                                                                                                                                                                                                                                                                                                                                                                                                                                                                                                                                                                                                                                                                                                                                                                                                          | -2.70032 | 1.61290  |   |         |          |          |   |         |          |          |   |         |          |          |   |         |         |         |   |         |         |         |   |         |          |         |   |         |          |         |   |         |          |         |   |         |          |          |   |         |         |         |   |         |          |         |   |          |          |          |   |          |          |          |   |          |          |         |   |          |          |         |   |          |          |         |   |          |         |          |   |          |          |          |   |          |          |         |   |          |          |          |   |          |          |         |   |          |          |         |   |          |         |         |   |         |          |          |   |         |          |          |   |          |          |         |   |         |         |         |   |          |         |          |   |          |          |         |

|   |          |          |          |
|---|----------|----------|----------|
| H | -5.37151 | -4.80746 | 0.53272  |
| H | -3.12952 | -4.88154 | -0.54356 |
| H | -1.68012 | -2.88986 | -0.53734 |
| H | -4.69466 | -0.69641 | 1.60000  |
| H | -0.83579 | -0.48616 | 3.08913  |
| H | 0.17747  | -1.92595 | 3.28495  |
| H | -1.41643 | -2.05672 | 2.52299  |
| H | -2.37105 | 0.11641  | 1.50678  |
| H | 0.39565  | -2.19735 | 0.85925  |
| H | 1.00634  | 0.91167  | 3.00196  |
| H | 4.74120  | 1.32329  | 3.40723  |
| H | 4.36215  | 2.50586  | 2.15387  |
| H | 3.32092  | 2.36810  | 3.58332  |
| H | 2.66174  | -1.59425 | 0.04194  |
| H | -2.57815 | 0.31017  | -1.27089 |
| H | -1.06795 | 1.79229  | -2.02543 |
| H | 7.21279  | -0.43091 | -2.50578 |
| H | 2.17013  | -1.83174 | -2.73185 |
| H | 0.52056  | -2.16094 | -3.36347 |
| H | 7.76863  | -1.73044 | -1.45110 |
| H | 1.11177  | -0.48385 | -3.25999 |
| H | 6.74119  | -2.11827 | -2.86242 |
| O | -3.89651 | 3.09592  | -0.98713 |
| H | -3.62613 | 2.24351  | -0.57920 |
| C | -5.09706 | 2.86278  | -1.71460 |
| H | -5.37689 | 3.80372  | -2.19706 |
| H | -5.92075 | 2.55490  | -1.05513 |
| H | -4.97297 | 2.09730  | -2.49402 |
| H | 5.02558  | -0.25382 | 0.33044  |
| H | 0.73606  | 2.41627  | 0.84604  |
| H | -2.08194 | 3.13237  | -1.81415 |
| C | -0.48289 | 3.06336  | -0.59087 |
| N | -0.52159 | 4.35882  | -0.19826 |
| H | -0.80992 | 5.03234  | -0.89395 |
| C | 0.05908  | 4.85387  | 1.03777  |
| H | -0.28008 | 5.87946  | 1.19208  |
| H | 1.15701  | 4.85020  | 1.01614  |
| H | -0.28081 | 4.24992  | 1.88552  |

Optimized Molecular Properties for TArg-Int3

|                                                |                                                                                                                                                                                                                                                                                                                                                                                                                                                                                                                                                                                                                                                                                                                                                                                                                                                                                                                                                                                                                                                                                                                                                                                                                                                                                                                                                                                                                                                                                                                                                                                                                                                                                                                                                                                                                                                                                                                                                                          |          |          |         |          |   |          |         |          |   |          |          |         |   |          |          |         |   |          |          |         |   |          |          |         |   |          |          |         |   |          |          |         |   |          |         |          |   |          |          |          |   |         |          |         |   |         |         |         |   |         |         |         |   |         |          |         |   |         |          |          |   |         |          |          |   |         |          |          |   |         |         |          |   |         |          |         |   |         |         |          |   |         |         |          |   |         |         |          |   |          |          |          |   |         |         |         |   |         |         |         |   |         |          |         |
|------------------------------------------------|--------------------------------------------------------------------------------------------------------------------------------------------------------------------------------------------------------------------------------------------------------------------------------------------------------------------------------------------------------------------------------------------------------------------------------------------------------------------------------------------------------------------------------------------------------------------------------------------------------------------------------------------------------------------------------------------------------------------------------------------------------------------------------------------------------------------------------------------------------------------------------------------------------------------------------------------------------------------------------------------------------------------------------------------------------------------------------------------------------------------------------------------------------------------------------------------------------------------------------------------------------------------------------------------------------------------------------------------------------------------------------------------------------------------------------------------------------------------------------------------------------------------------------------------------------------------------------------------------------------------------------------------------------------------------------------------------------------------------------------------------------------------------------------------------------------------------------------------------------------------------------------------------------------------------------------------------------------------------|----------|----------|---------|----------|---|----------|---------|----------|---|----------|----------|---------|---|----------|----------|---------|---|----------|----------|---------|---|----------|----------|---------|---|----------|----------|---------|---|----------|----------|---------|---|----------|---------|----------|---|----------|----------|----------|---|---------|----------|---------|---|---------|---------|---------|---|---------|---------|---------|---|---------|----------|---------|---|---------|----------|----------|---|---------|----------|----------|---|---------|----------|----------|---|---------|---------|----------|---|---------|----------|---------|---|---------|---------|----------|---|---------|---------|----------|---|---------|---------|----------|---|----------|----------|----------|---|---------|---------|---------|---|---------|---------|---------|---|---------|----------|---------|
| Number of<br>(-)<br>Vibrational<br>Frequencies | 0                                                                                                                                                                                                                                                                                                                                                                                                                                                                                                                                                                                                                                                                                                                                                                                                                                                                                                                                                                                                                                                                                                                                                                                                                                                                                                                                                                                                                                                                                                                                                                                                                                                                                                                                                                                                                                                                                                                                                                        |          |          |         |          |   |          |         |          |   |          |          |         |   |          |          |         |   |          |          |         |   |          |          |         |   |          |          |         |   |          |          |         |   |          |         |          |   |          |          |          |   |         |          |         |   |         |         |         |   |         |         |         |   |         |          |         |   |         |          |          |   |         |          |          |   |         |          |          |   |         |         |          |   |         |          |         |   |         |         |          |   |         |         |          |   |         |         |          |   |          |          |          |   |         |         |         |   |         |         |         |   |         |          |         |
| Absolute<br>Energies<br>(Hartrees)             | <p><b>B3LYP/6-31G(d) (PCM)</b></p> <p>There are 17 positive frequencies below 100 cm<sup>-1</sup>.</p> <p>Zero-point correction: 0.563954 hartree<br/>         Enthalpy correction: 0.603248 hartree<br/>         Free Energy correction: 0.491800 hartree<br/>         Quasiharmonic Free Energy correction: 0.502644 hartree</p> <p>SCF Energy: -1546.446460 hartree<br/>         SCF Energy + ZPVE: -1545.882506 hartree<br/>         Enthalpy: -1545.843212 hartree<br/>         Free Energy: -1545.954660 hartree</p> <p>Free Energy with quasiharmonic correction: -1545.943816 hartree<br/>         (correction: 6.80 kcal/mol)</p> <p><b>B3LYP-D3/6-311+G(d,p) (PCM)</b></p> <p>SCF Done: E(RB3LYP) = -1547.01074846 A.U.</p>                                                                                                                                                                                                                                                                                                                                                                                                                                                                                                                                                                                                                                                                                                                                                                                                                                                                                                                                                                                                                                                                                                                                                                                                                                    |          |          |         |          |   |          |         |          |   |          |          |         |   |          |          |         |   |          |          |         |   |          |          |         |   |          |          |         |   |          |          |         |   |          |         |          |   |          |          |          |   |         |          |         |   |         |         |         |   |         |         |         |   |         |          |         |   |         |          |          |   |         |          |          |   |         |          |          |   |         |         |          |   |         |          |         |   |         |         |          |   |         |         |          |   |         |         |          |   |          |          |          |   |         |         |         |   |         |         |         |   |         |          |         |
| Cartesian<br>Coordinates                       | <p>(PCM)</p> <p>67</p> <p>spD3-R-TS4-Targ.out Energy: -970763.8933034</p> <table> <tr><td>C</td><td>-4.65478</td><td>0.72592</td><td>-0.39378</td></tr> <tr><td>O</td><td>-3.64922</td><td>1.25861</td><td>-0.95261</td></tr> <tr><td>O</td><td>-4.65874</td><td>-0.37110</td><td>0.23849</td></tr> <tr><td>C</td><td>-2.31958</td><td>-3.08253</td><td>0.38021</td></tr> <tr><td>C</td><td>-1.01254</td><td>-3.40403</td><td>0.66013</td></tr> <tr><td>N</td><td>-2.44988</td><td>-1.73296</td><td>0.65500</td></tr> <tr><td>C</td><td>-1.27304</td><td>-1.26640</td><td>1.07885</td></tr> <tr><td>N</td><td>-0.37347</td><td>-2.25265</td><td>1.09294</td></tr> <tr><td>C</td><td>-5.97855</td><td>1.48672</td><td>-0.46851</td></tr> <tr><td>C</td><td>-3.46405</td><td>-3.92386</td><td>-0.08638</td></tr> <tr><td>C</td><td>1.11443</td><td>-2.02311</td><td>1.51579</td></tr> <tr><td>C</td><td>1.63243</td><td>0.42915</td><td>1.59300</td></tr> <tr><td>O</td><td>2.05187</td><td>1.54812</td><td>1.19981</td></tr> <tr><td>C</td><td>1.68067</td><td>-0.78700</td><td>0.90478</td></tr> <tr><td>C</td><td>2.12403</td><td>-0.77762</td><td>-0.53367</td></tr> <tr><td>C</td><td>3.49785</td><td>-0.16082</td><td>-0.81007</td></tr> <tr><td>O</td><td>1.15973</td><td>-0.14596</td><td>-1.43799</td></tr> <tr><td>C</td><td>3.76178</td><td>0.51736</td><td>-2.00645</td></tr> <tr><td>C</td><td>4.55675</td><td>-0.35878</td><td>0.08657</td></tr> <tr><td>C</td><td>5.04347</td><td>0.99531</td><td>-2.29264</td></tr> <tr><td>C</td><td>5.83928</td><td>0.10967</td><td>-0.19895</td></tr> <tr><td>C</td><td>6.09039</td><td>0.79208</td><td>-1.39241</td></tr> <tr><td>H</td><td>-1.05322</td><td>-2.59030</td><td>-1.75267</td></tr> <tr><td>O</td><td>1.03301</td><td>0.35591</td><td>2.86234</td></tr> <tr><td>C</td><td>1.11221</td><td>1.53820</td><td>3.65143</td></tr> <tr><td>C</td><td>1.87029</td><td>-3.33234</td><td>1.26852</td></tr> </table> | C        | -4.65478 | 0.72592 | -0.39378 | O | -3.64922 | 1.25861 | -0.95261 | O | -4.65874 | -0.37110 | 0.23849 | C | -2.31958 | -3.08253 | 0.38021 | C | -1.01254 | -3.40403 | 0.66013 | N | -2.44988 | -1.73296 | 0.65500 | C | -1.27304 | -1.26640 | 1.07885 | N | -0.37347 | -2.25265 | 1.09294 | C | -5.97855 | 1.48672 | -0.46851 | C | -3.46405 | -3.92386 | -0.08638 | C | 1.11443 | -2.02311 | 1.51579 | C | 1.63243 | 0.42915 | 1.59300 | O | 2.05187 | 1.54812 | 1.19981 | C | 1.68067 | -0.78700 | 0.90478 | C | 2.12403 | -0.77762 | -0.53367 | C | 3.49785 | -0.16082 | -0.81007 | O | 1.15973 | -0.14596 | -1.43799 | C | 3.76178 | 0.51736 | -2.00645 | C | 4.55675 | -0.35878 | 0.08657 | C | 5.04347 | 0.99531 | -2.29264 | C | 5.83928 | 0.10967 | -0.19895 | C | 6.09039 | 0.79208 | -1.39241 | H | -1.05322 | -2.59030 | -1.75267 | O | 1.03301 | 0.35591 | 2.86234 | C | 1.11221 | 1.53820 | 3.65143 | C | 1.87029 | -3.33234 | 1.26852 |
| C                                              | -4.65478                                                                                                                                                                                                                                                                                                                                                                                                                                                                                                                                                                                                                                                                                                                                                                                                                                                                                                                                                                                                                                                                                                                                                                                                                                                                                                                                                                                                                                                                                                                                                                                                                                                                                                                                                                                                                                                                                                                                                                 | 0.72592  | -0.39378 |         |          |   |          |         |          |   |          |          |         |   |          |          |         |   |          |          |         |   |          |          |         |   |          |          |         |   |          |          |         |   |          |         |          |   |          |          |          |   |         |          |         |   |         |         |         |   |         |         |         |   |         |          |         |   |         |          |          |   |         |          |          |   |         |          |          |   |         |         |          |   |         |          |         |   |         |         |          |   |         |         |          |   |         |         |          |   |          |          |          |   |         |         |         |   |         |         |         |   |         |          |         |
| O                                              | -3.64922                                                                                                                                                                                                                                                                                                                                                                                                                                                                                                                                                                                                                                                                                                                                                                                                                                                                                                                                                                                                                                                                                                                                                                                                                                                                                                                                                                                                                                                                                                                                                                                                                                                                                                                                                                                                                                                                                                                                                                 | 1.25861  | -0.95261 |         |          |   |          |         |          |   |          |          |         |   |          |          |         |   |          |          |         |   |          |          |         |   |          |          |         |   |          |          |         |   |          |         |          |   |          |          |          |   |         |          |         |   |         |         |         |   |         |         |         |   |         |          |         |   |         |          |          |   |         |          |          |   |         |          |          |   |         |         |          |   |         |          |         |   |         |         |          |   |         |         |          |   |         |         |          |   |          |          |          |   |         |         |         |   |         |         |         |   |         |          |         |
| O                                              | -4.65874                                                                                                                                                                                                                                                                                                                                                                                                                                                                                                                                                                                                                                                                                                                                                                                                                                                                                                                                                                                                                                                                                                                                                                                                                                                                                                                                                                                                                                                                                                                                                                                                                                                                                                                                                                                                                                                                                                                                                                 | -0.37110 | 0.23849  |         |          |   |          |         |          |   |          |          |         |   |          |          |         |   |          |          |         |   |          |          |         |   |          |          |         |   |          |          |         |   |          |         |          |   |          |          |          |   |         |          |         |   |         |         |         |   |         |         |         |   |         |          |         |   |         |          |          |   |         |          |          |   |         |          |          |   |         |         |          |   |         |          |         |   |         |         |          |   |         |         |          |   |         |         |          |   |          |          |          |   |         |         |         |   |         |         |         |   |         |          |         |
| C                                              | -2.31958                                                                                                                                                                                                                                                                                                                                                                                                                                                                                                                                                                                                                                                                                                                                                                                                                                                                                                                                                                                                                                                                                                                                                                                                                                                                                                                                                                                                                                                                                                                                                                                                                                                                                                                                                                                                                                                                                                                                                                 | -3.08253 | 0.38021  |         |          |   |          |         |          |   |          |          |         |   |          |          |         |   |          |          |         |   |          |          |         |   |          |          |         |   |          |          |         |   |          |         |          |   |          |          |          |   |         |          |         |   |         |         |         |   |         |         |         |   |         |          |         |   |         |          |          |   |         |          |          |   |         |          |          |   |         |         |          |   |         |          |         |   |         |         |          |   |         |         |          |   |         |         |          |   |          |          |          |   |         |         |         |   |         |         |         |   |         |          |         |
| C                                              | -1.01254                                                                                                                                                                                                                                                                                                                                                                                                                                                                                                                                                                                                                                                                                                                                                                                                                                                                                                                                                                                                                                                                                                                                                                                                                                                                                                                                                                                                                                                                                                                                                                                                                                                                                                                                                                                                                                                                                                                                                                 | -3.40403 | 0.66013  |         |          |   |          |         |          |   |          |          |         |   |          |          |         |   |          |          |         |   |          |          |         |   |          |          |         |   |          |          |         |   |          |         |          |   |          |          |          |   |         |          |         |   |         |         |         |   |         |         |         |   |         |          |         |   |         |          |          |   |         |          |          |   |         |          |          |   |         |         |          |   |         |          |         |   |         |         |          |   |         |         |          |   |         |         |          |   |          |          |          |   |         |         |         |   |         |         |         |   |         |          |         |
| N                                              | -2.44988                                                                                                                                                                                                                                                                                                                                                                                                                                                                                                                                                                                                                                                                                                                                                                                                                                                                                                                                                                                                                                                                                                                                                                                                                                                                                                                                                                                                                                                                                                                                                                                                                                                                                                                                                                                                                                                                                                                                                                 | -1.73296 | 0.65500  |         |          |   |          |         |          |   |          |          |         |   |          |          |         |   |          |          |         |   |          |          |         |   |          |          |         |   |          |          |         |   |          |         |          |   |          |          |          |   |         |          |         |   |         |         |         |   |         |         |         |   |         |          |         |   |         |          |          |   |         |          |          |   |         |          |          |   |         |         |          |   |         |          |         |   |         |         |          |   |         |         |          |   |         |         |          |   |          |          |          |   |         |         |         |   |         |         |         |   |         |          |         |
| C                                              | -1.27304                                                                                                                                                                                                                                                                                                                                                                                                                                                                                                                                                                                                                                                                                                                                                                                                                                                                                                                                                                                                                                                                                                                                                                                                                                                                                                                                                                                                                                                                                                                                                                                                                                                                                                                                                                                                                                                                                                                                                                 | -1.26640 | 1.07885  |         |          |   |          |         |          |   |          |          |         |   |          |          |         |   |          |          |         |   |          |          |         |   |          |          |         |   |          |          |         |   |          |         |          |   |          |          |          |   |         |          |         |   |         |         |         |   |         |         |         |   |         |          |         |   |         |          |          |   |         |          |          |   |         |          |          |   |         |         |          |   |         |          |         |   |         |         |          |   |         |         |          |   |         |         |          |   |          |          |          |   |         |         |         |   |         |         |         |   |         |          |         |
| N                                              | -0.37347                                                                                                                                                                                                                                                                                                                                                                                                                                                                                                                                                                                                                                                                                                                                                                                                                                                                                                                                                                                                                                                                                                                                                                                                                                                                                                                                                                                                                                                                                                                                                                                                                                                                                                                                                                                                                                                                                                                                                                 | -2.25265 | 1.09294  |         |          |   |          |         |          |   |          |          |         |   |          |          |         |   |          |          |         |   |          |          |         |   |          |          |         |   |          |          |         |   |          |         |          |   |          |          |          |   |         |          |         |   |         |         |         |   |         |         |         |   |         |          |         |   |         |          |          |   |         |          |          |   |         |          |          |   |         |         |          |   |         |          |         |   |         |         |          |   |         |         |          |   |         |         |          |   |          |          |          |   |         |         |         |   |         |         |         |   |         |          |         |
| C                                              | -5.97855                                                                                                                                                                                                                                                                                                                                                                                                                                                                                                                                                                                                                                                                                                                                                                                                                                                                                                                                                                                                                                                                                                                                                                                                                                                                                                                                                                                                                                                                                                                                                                                                                                                                                                                                                                                                                                                                                                                                                                 | 1.48672  | -0.46851 |         |          |   |          |         |          |   |          |          |         |   |          |          |         |   |          |          |         |   |          |          |         |   |          |          |         |   |          |          |         |   |          |         |          |   |          |          |          |   |         |          |         |   |         |         |         |   |         |         |         |   |         |          |         |   |         |          |          |   |         |          |          |   |         |          |          |   |         |         |          |   |         |          |         |   |         |         |          |   |         |         |          |   |         |         |          |   |          |          |          |   |         |         |         |   |         |         |         |   |         |          |         |
| C                                              | -3.46405                                                                                                                                                                                                                                                                                                                                                                                                                                                                                                                                                                                                                                                                                                                                                                                                                                                                                                                                                                                                                                                                                                                                                                                                                                                                                                                                                                                                                                                                                                                                                                                                                                                                                                                                                                                                                                                                                                                                                                 | -3.92386 | -0.08638 |         |          |   |          |         |          |   |          |          |         |   |          |          |         |   |          |          |         |   |          |          |         |   |          |          |         |   |          |          |         |   |          |         |          |   |          |          |          |   |         |          |         |   |         |         |         |   |         |         |         |   |         |          |         |   |         |          |          |   |         |          |          |   |         |          |          |   |         |         |          |   |         |          |         |   |         |         |          |   |         |         |          |   |         |         |          |   |          |          |          |   |         |         |         |   |         |         |         |   |         |          |         |
| C                                              | 1.11443                                                                                                                                                                                                                                                                                                                                                                                                                                                                                                                                                                                                                                                                                                                                                                                                                                                                                                                                                                                                                                                                                                                                                                                                                                                                                                                                                                                                                                                                                                                                                                                                                                                                                                                                                                                                                                                                                                                                                                  | -2.02311 | 1.51579  |         |          |   |          |         |          |   |          |          |         |   |          |          |         |   |          |          |         |   |          |          |         |   |          |          |         |   |          |          |         |   |          |         |          |   |          |          |          |   |         |          |         |   |         |         |         |   |         |         |         |   |         |          |         |   |         |          |          |   |         |          |          |   |         |          |          |   |         |         |          |   |         |          |         |   |         |         |          |   |         |         |          |   |         |         |          |   |          |          |          |   |         |         |         |   |         |         |         |   |         |          |         |
| C                                              | 1.63243                                                                                                                                                                                                                                                                                                                                                                                                                                                                                                                                                                                                                                                                                                                                                                                                                                                                                                                                                                                                                                                                                                                                                                                                                                                                                                                                                                                                                                                                                                                                                                                                                                                                                                                                                                                                                                                                                                                                                                  | 0.42915  | 1.59300  |         |          |   |          |         |          |   |          |          |         |   |          |          |         |   |          |          |         |   |          |          |         |   |          |          |         |   |          |          |         |   |          |         |          |   |          |          |          |   |         |          |         |   |         |         |         |   |         |         |         |   |         |          |         |   |         |          |          |   |         |          |          |   |         |          |          |   |         |         |          |   |         |          |         |   |         |         |          |   |         |         |          |   |         |         |          |   |          |          |          |   |         |         |         |   |         |         |         |   |         |          |         |
| O                                              | 2.05187                                                                                                                                                                                                                                                                                                                                                                                                                                                                                                                                                                                                                                                                                                                                                                                                                                                                                                                                                                                                                                                                                                                                                                                                                                                                                                                                                                                                                                                                                                                                                                                                                                                                                                                                                                                                                                                                                                                                                                  | 1.54812  | 1.19981  |         |          |   |          |         |          |   |          |          |         |   |          |          |         |   |          |          |         |   |          |          |         |   |          |          |         |   |          |          |         |   |          |         |          |   |          |          |          |   |         |          |         |   |         |         |         |   |         |         |         |   |         |          |         |   |         |          |          |   |         |          |          |   |         |          |          |   |         |         |          |   |         |          |         |   |         |         |          |   |         |         |          |   |         |         |          |   |          |          |          |   |         |         |         |   |         |         |         |   |         |          |         |
| C                                              | 1.68067                                                                                                                                                                                                                                                                                                                                                                                                                                                                                                                                                                                                                                                                                                                                                                                                                                                                                                                                                                                                                                                                                                                                                                                                                                                                                                                                                                                                                                                                                                                                                                                                                                                                                                                                                                                                                                                                                                                                                                  | -0.78700 | 0.90478  |         |          |   |          |         |          |   |          |          |         |   |          |          |         |   |          |          |         |   |          |          |         |   |          |          |         |   |          |          |         |   |          |         |          |   |          |          |          |   |         |          |         |   |         |         |         |   |         |         |         |   |         |          |         |   |         |          |          |   |         |          |          |   |         |          |          |   |         |         |          |   |         |          |         |   |         |         |          |   |         |         |          |   |         |         |          |   |          |          |          |   |         |         |         |   |         |         |         |   |         |          |         |
| C                                              | 2.12403                                                                                                                                                                                                                                                                                                                                                                                                                                                                                                                                                                                                                                                                                                                                                                                                                                                                                                                                                                                                                                                                                                                                                                                                                                                                                                                                                                                                                                                                                                                                                                                                                                                                                                                                                                                                                                                                                                                                                                  | -0.77762 | -0.53367 |         |          |   |          |         |          |   |          |          |         |   |          |          |         |   |          |          |         |   |          |          |         |   |          |          |         |   |          |          |         |   |          |         |          |   |          |          |          |   |         |          |         |   |         |         |         |   |         |         |         |   |         |          |         |   |         |          |          |   |         |          |          |   |         |          |          |   |         |         |          |   |         |          |         |   |         |         |          |   |         |         |          |   |         |         |          |   |          |          |          |   |         |         |         |   |         |         |         |   |         |          |         |
| C                                              | 3.49785                                                                                                                                                                                                                                                                                                                                                                                                                                                                                                                                                                                                                                                                                                                                                                                                                                                                                                                                                                                                                                                                                                                                                                                                                                                                                                                                                                                                                                                                                                                                                                                                                                                                                                                                                                                                                                                                                                                                                                  | -0.16082 | -0.81007 |         |          |   |          |         |          |   |          |          |         |   |          |          |         |   |          |          |         |   |          |          |         |   |          |          |         |   |          |          |         |   |          |         |          |   |          |          |          |   |         |          |         |   |         |         |         |   |         |         |         |   |         |          |         |   |         |          |          |   |         |          |          |   |         |          |          |   |         |         |          |   |         |          |         |   |         |         |          |   |         |         |          |   |         |         |          |   |          |          |          |   |         |         |         |   |         |         |         |   |         |          |         |
| O                                              | 1.15973                                                                                                                                                                                                                                                                                                                                                                                                                                                                                                                                                                                                                                                                                                                                                                                                                                                                                                                                                                                                                                                                                                                                                                                                                                                                                                                                                                                                                                                                                                                                                                                                                                                                                                                                                                                                                                                                                                                                                                  | -0.14596 | -1.43799 |         |          |   |          |         |          |   |          |          |         |   |          |          |         |   |          |          |         |   |          |          |         |   |          |          |         |   |          |          |         |   |          |         |          |   |          |          |          |   |         |          |         |   |         |         |         |   |         |         |         |   |         |          |         |   |         |          |          |   |         |          |          |   |         |          |          |   |         |         |          |   |         |          |         |   |         |         |          |   |         |         |          |   |         |         |          |   |          |          |          |   |         |         |         |   |         |         |         |   |         |          |         |
| C                                              | 3.76178                                                                                                                                                                                                                                                                                                                                                                                                                                                                                                                                                                                                                                                                                                                                                                                                                                                                                                                                                                                                                                                                                                                                                                                                                                                                                                                                                                                                                                                                                                                                                                                                                                                                                                                                                                                                                                                                                                                                                                  | 0.51736  | -2.00645 |         |          |   |          |         |          |   |          |          |         |   |          |          |         |   |          |          |         |   |          |          |         |   |          |          |         |   |          |          |         |   |          |         |          |   |          |          |          |   |         |          |         |   |         |         |         |   |         |         |         |   |         |          |         |   |         |          |          |   |         |          |          |   |         |          |          |   |         |         |          |   |         |          |         |   |         |         |          |   |         |         |          |   |         |         |          |   |          |          |          |   |         |         |         |   |         |         |         |   |         |          |         |
| C                                              | 4.55675                                                                                                                                                                                                                                                                                                                                                                                                                                                                                                                                                                                                                                                                                                                                                                                                                                                                                                                                                                                                                                                                                                                                                                                                                                                                                                                                                                                                                                                                                                                                                                                                                                                                                                                                                                                                                                                                                                                                                                  | -0.35878 | 0.08657  |         |          |   |          |         |          |   |          |          |         |   |          |          |         |   |          |          |         |   |          |          |         |   |          |          |         |   |          |          |         |   |          |         |          |   |          |          |          |   |         |          |         |   |         |         |         |   |         |         |         |   |         |          |         |   |         |          |          |   |         |          |          |   |         |          |          |   |         |         |          |   |         |          |         |   |         |         |          |   |         |         |          |   |         |         |          |   |          |          |          |   |         |         |         |   |         |         |         |   |         |          |         |
| C                                              | 5.04347                                                                                                                                                                                                                                                                                                                                                                                                                                                                                                                                                                                                                                                                                                                                                                                                                                                                                                                                                                                                                                                                                                                                                                                                                                                                                                                                                                                                                                                                                                                                                                                                                                                                                                                                                                                                                                                                                                                                                                  | 0.99531  | -2.29264 |         |          |   |          |         |          |   |          |          |         |   |          |          |         |   |          |          |         |   |          |          |         |   |          |          |         |   |          |          |         |   |          |         |          |   |          |          |          |   |         |          |         |   |         |         |         |   |         |         |         |   |         |          |         |   |         |          |          |   |         |          |          |   |         |          |          |   |         |         |          |   |         |          |         |   |         |         |          |   |         |         |          |   |         |         |          |   |          |          |          |   |         |         |         |   |         |         |         |   |         |          |         |
| C                                              | 5.83928                                                                                                                                                                                                                                                                                                                                                                                                                                                                                                                                                                                                                                                                                                                                                                                                                                                                                                                                                                                                                                                                                                                                                                                                                                                                                                                                                                                                                                                                                                                                                                                                                                                                                                                                                                                                                                                                                                                                                                  | 0.10967  | -0.19895 |         |          |   |          |         |          |   |          |          |         |   |          |          |         |   |          |          |         |   |          |          |         |   |          |          |         |   |          |          |         |   |          |         |          |   |          |          |          |   |         |          |         |   |         |         |         |   |         |         |         |   |         |          |         |   |         |          |          |   |         |          |          |   |         |          |          |   |         |         |          |   |         |          |         |   |         |         |          |   |         |         |          |   |         |         |          |   |          |          |          |   |         |         |         |   |         |         |         |   |         |          |         |
| C                                              | 6.09039                                                                                                                                                                                                                                                                                                                                                                                                                                                                                                                                                                                                                                                                                                                                                                                                                                                                                                                                                                                                                                                                                                                                                                                                                                                                                                                                                                                                                                                                                                                                                                                                                                                                                                                                                                                                                                                                                                                                                                  | 0.79208  | -1.39241 |         |          |   |          |         |          |   |          |          |         |   |          |          |         |   |          |          |         |   |          |          |         |   |          |          |         |   |          |          |         |   |          |         |          |   |          |          |          |   |         |          |         |   |         |         |         |   |         |         |         |   |         |          |         |   |         |          |          |   |         |          |          |   |         |          |          |   |         |         |          |   |         |          |         |   |         |         |          |   |         |         |          |   |         |         |          |   |          |          |          |   |         |         |         |   |         |         |         |   |         |          |         |
| H                                              | -1.05322                                                                                                                                                                                                                                                                                                                                                                                                                                                                                                                                                                                                                                                                                                                                                                                                                                                                                                                                                                                                                                                                                                                                                                                                                                                                                                                                                                                                                                                                                                                                                                                                                                                                                                                                                                                                                                                                                                                                                                 | -2.59030 | -1.75267 |         |          |   |          |         |          |   |          |          |         |   |          |          |         |   |          |          |         |   |          |          |         |   |          |          |         |   |          |          |         |   |          |         |          |   |          |          |          |   |         |          |         |   |         |         |         |   |         |         |         |   |         |          |         |   |         |          |          |   |         |          |          |   |         |          |          |   |         |         |          |   |         |          |         |   |         |         |          |   |         |         |          |   |         |         |          |   |          |          |          |   |         |         |         |   |         |         |         |   |         |          |         |
| O                                              | 1.03301                                                                                                                                                                                                                                                                                                                                                                                                                                                                                                                                                                                                                                                                                                                                                                                                                                                                                                                                                                                                                                                                                                                                                                                                                                                                                                                                                                                                                                                                                                                                                                                                                                                                                                                                                                                                                                                                                                                                                                  | 0.35591  | 2.86234  |         |          |   |          |         |          |   |          |          |         |   |          |          |         |   |          |          |         |   |          |          |         |   |          |          |         |   |          |          |         |   |          |         |          |   |          |          |          |   |         |          |         |   |         |         |         |   |         |         |         |   |         |          |         |   |         |          |          |   |         |          |          |   |         |          |          |   |         |         |          |   |         |          |         |   |         |         |          |   |         |         |          |   |         |         |          |   |          |          |          |   |         |         |         |   |         |         |         |   |         |          |         |
| C                                              | 1.11221                                                                                                                                                                                                                                                                                                                                                                                                                                                                                                                                                                                                                                                                                                                                                                                                                                                                                                                                                                                                                                                                                                                                                                                                                                                                                                                                                                                                                                                                                                                                                                                                                                                                                                                                                                                                                                                                                                                                                                  | 1.53820  | 3.65143  |         |          |   |          |         |          |   |          |          |         |   |          |          |         |   |          |          |         |   |          |          |         |   |          |          |         |   |          |          |         |   |          |         |          |   |          |          |          |   |         |          |         |   |         |         |         |   |         |         |         |   |         |          |         |   |         |          |          |   |         |          |          |   |         |          |          |   |         |         |          |   |         |          |         |   |         |         |          |   |         |         |          |   |         |         |          |   |          |          |          |   |         |         |         |   |         |         |         |   |         |          |         |
| C                                              | 1.87029                                                                                                                                                                                                                                                                                                                                                                                                                                                                                                                                                                                                                                                                                                                                                                                                                                                                                                                                                                                                                                                                                                                                                                                                                                                                                                                                                                                                                                                                                                                                                                                                                                                                                                                                                                                                                                                                                                                                                                  | -3.33234 | 1.26852  |         |          |   |          |         |          |   |          |          |         |   |          |          |         |   |          |          |         |   |          |          |         |   |          |          |         |   |          |          |         |   |          |         |          |   |          |          |          |   |         |          |         |   |         |         |         |   |         |         |         |   |         |          |         |   |         |          |          |   |         |          |          |   |         |          |          |   |         |         |          |   |         |          |         |   |         |         |          |   |         |         |          |   |         |         |          |   |          |          |          |   |         |         |         |   |         |         |         |   |         |          |         |

|   |          |          |          |
|---|----------|----------|----------|
| N | -0.91052 | 1.53399  | -0.49914 |
| N | 0.25964  | 3.40884  | 0.18629  |
| H | 6.64324  | -0.05270 | 0.51546  |
| H | 7.08825  | 1.16196  | -1.61509 |
| H | 5.22263  | 1.52646  | -3.22491 |
| H | 2.95039  | 0.67362  | -2.70815 |
| H | 4.35973  | -0.87126 | 1.02397  |
| H | 2.90128  | -3.19717 | 1.60544  |
| H | 1.89813  | -3.61596 | 0.21142  |
| H | 1.44001  | -4.16507 | 1.83607  |
| H | 2.20183  | -1.82133 | -0.86973 |
| H | 1.03534  | -1.87382 | 2.59307  |
| H | -0.50764 | -4.35347 | 0.59308  |
| H | -4.22130 | -4.02857 | 0.69902  |
| H | -3.95609 | -3.47983 | -0.95839 |
| H | -3.11436 | -4.92320 | -0.35728 |
| H | -1.06194 | -0.24450 | 1.34650  |
| H | -0.04432 | 1.02585  | -0.73618 |
| H | 1.01330  | 2.78322  | 0.53076  |
| H | -5.96693 | 2.30212  | 0.26590  |
| H | 0.63399  | 1.29271  | 4.60314  |
| H | 2.15073  | 1.83864  | 3.82750  |
| H | -6.10513 | 1.93771  | -1.45718 |
| H | 0.58615  | 2.37675  | 3.18262  |
| H | -6.82446 | 0.83355  | -0.24232 |
| O | -0.64941 | -2.03923 | -2.44401 |
| H | 0.55527  | -0.84785 | -1.76527 |
| C | -1.69700 | -1.42182 | -3.20300 |
| H | -2.31664 | -2.17439 | -3.70656 |
| H | -1.20983 | -0.80510 | -3.96119 |
| H | -2.33639 | -0.78134 | -2.58271 |
| H | -3.33381 | -1.12925 | 0.47717  |
| H | -1.82187 | 1.14334  | -0.76259 |
| H | 0.25803  | 4.36632  | 0.50451  |
| C | -0.89336 | 2.83413  | -0.18842 |
| N | -2.04215 | 3.52698  | -0.26449 |
| H | -2.85415 | 2.98620  | -0.57511 |
| C | -2.21007 | 4.89356  | 0.19942  |
| H | -1.61048 | 5.59831  | -0.38943 |
| H | -1.94675 | 5.00063  | 1.25940  |
| H | -3.25994 | 5.16466  | 0.08061  |

Optimized Molecular Properties for **TArg-TS4**

|                                                |                                                                                                                                                                                                                                                                                                                                                                                                                                                                                                                                                                                                                                                                                                                                                                                                                                                                                                                                                                                                                                                                                                                                                                                                                                                                                                                                                                                                                                                                                                                                                                                                                                                                                                                                                                                                                                                                                                                                                                                                    |          |          |   |          |         |          |   |          |         |          |   |          |          |         |   |          |          |         |   |          |          |         |   |          |          |         |   |          |          |         |   |          |          |         |   |          |         |          |   |          |          |          |   |         |          |         |   |         |         |         |   |         |         |         |   |         |          |         |   |         |          |          |   |         |          |          |   |         |          |          |   |         |         |          |   |         |          |         |   |         |         |          |   |         |         |          |   |         |         |          |   |          |          |          |   |         |         |         |   |         |         |         |   |         |          |         |
|------------------------------------------------|----------------------------------------------------------------------------------------------------------------------------------------------------------------------------------------------------------------------------------------------------------------------------------------------------------------------------------------------------------------------------------------------------------------------------------------------------------------------------------------------------------------------------------------------------------------------------------------------------------------------------------------------------------------------------------------------------------------------------------------------------------------------------------------------------------------------------------------------------------------------------------------------------------------------------------------------------------------------------------------------------------------------------------------------------------------------------------------------------------------------------------------------------------------------------------------------------------------------------------------------------------------------------------------------------------------------------------------------------------------------------------------------------------------------------------------------------------------------------------------------------------------------------------------------------------------------------------------------------------------------------------------------------------------------------------------------------------------------------------------------------------------------------------------------------------------------------------------------------------------------------------------------------------------------------------------------------------------------------------------------------|----------|----------|---|----------|---------|----------|---|----------|---------|----------|---|----------|----------|---------|---|----------|----------|---------|---|----------|----------|---------|---|----------|----------|---------|---|----------|----------|---------|---|----------|----------|---------|---|----------|---------|----------|---|----------|----------|----------|---|---------|----------|---------|---|---------|---------|---------|---|---------|---------|---------|---|---------|----------|---------|---|---------|----------|----------|---|---------|----------|----------|---|---------|----------|----------|---|---------|---------|----------|---|---------|----------|---------|---|---------|---------|----------|---|---------|---------|----------|---|---------|---------|----------|---|----------|----------|----------|---|---------|---------|---------|---|---------|---------|---------|---|---------|----------|---------|
| Number of<br>(-)<br>Vibrational<br>Frequencies | 0 (-266.7866)                                                                                                                                                                                                                                                                                                                                                                                                                                                                                                                                                                                                                                                                                                                                                                                                                                                                                                                                                                                                                                                                                                                                                                                                                                                                                                                                                                                                                                                                                                                                                                                                                                                                                                                                                                                                                                                                                                                                                                                      |          |          |   |          |         |          |   |          |         |          |   |          |          |         |   |          |          |         |   |          |          |         |   |          |          |         |   |          |          |         |   |          |          |         |   |          |         |          |   |          |          |          |   |         |          |         |   |         |         |         |   |         |         |         |   |         |          |         |   |         |          |          |   |         |          |          |   |         |          |          |   |         |         |          |   |         |          |         |   |         |         |          |   |         |         |          |   |         |         |          |   |          |          |          |   |         |         |         |   |         |         |         |   |         |          |         |
| Absolute<br>Energies<br>(Hartrees)             | <p><b>B3LYP/6-31G(d) (PCM)</b></p> <p>There are 18 positive frequencies below 100 cm<sup>-1</sup>.</p> <p>Zero-point correction: 0.563170 hartree<br/>         Enthalpy correction: 0.602292 hartree<br/>         Free Energy correction: 0.491403 hartree<br/>         Quasiharmonic Free Energy correction: 0.501820 hartree</p> <p>SCF Energy: -1546.443548 hartree<br/>         SCF Energy + ZPVE: -1545.880378 hartree<br/>         Enthalpy: -1545.841256 hartree<br/>         Free Energy: -1545.952145 hartree</p> <p>Free Energy with quasiharmonic correction: -1545.941728 hartree<br/>         (correction: 6.54 kcal/mol)</p> <p><b>B3LYP-D3/6-311+G(d,p) (PCM)</b></p> <p>SCF Done: E(RB3LYP) = -1547.00661396 A.U.</p>                                                                                                                                                                                                                                                                                                                                                                                                                                                                                                                                                                                                                                                                                                                                                                                                                                                                                                                                                                                                                                                                                                                                                                                                                                                              |          |          |   |          |         |          |   |          |         |          |   |          |          |         |   |          |          |         |   |          |          |         |   |          |          |         |   |          |          |         |   |          |          |         |   |          |         |          |   |          |          |          |   |         |          |         |   |         |         |         |   |         |         |         |   |         |          |         |   |         |          |          |   |         |          |          |   |         |          |          |   |         |         |          |   |         |          |         |   |         |         |          |   |         |         |          |   |         |         |          |   |          |          |          |   |         |         |         |   |         |         |         |   |         |          |         |
| Cartesian<br>Coordinates                       | <p>(PCM)</p> <p>67</p> <p>spD3-TS4-Targ.out Energy: -970761.2988655</p> <table border="1"> <tbody> <tr><td>C</td><td>-4.64981</td><td>0.90419</td><td>-0.28861</td></tr> <tr><td>O</td><td>-3.61373</td><td>1.38963</td><td>-0.84159</td></tr> <tr><td>O</td><td>-4.71961</td><td>-0.20556</td><td>0.30934</td></tr> <tr><td>C</td><td>-2.50142</td><td>-3.07003</td><td>0.21353</td></tr> <tr><td>C</td><td>-1.20709</td><td>-3.47526</td><td>0.45861</td></tr> <tr><td>N</td><td>-2.56257</td><td>-1.74868</td><td>0.61463</td></tr> <tr><td>C</td><td>-1.35225</td><td>-1.39254</td><td>1.07515</td></tr> <tr><td>N</td><td>-0.50557</td><td>-2.41172</td><td>0.99592</td></tr> <tr><td>C</td><td>-5.92036</td><td>1.75467</td><td>-0.33987</td></tr> <tr><td>C</td><td>-3.68558</td><td>-3.80682</td><td>-0.32589</td></tr> <tr><td>C</td><td>1.25120</td><td>-2.17986</td><td>1.39520</td></tr> <tr><td>C</td><td>1.65552</td><td>0.25067</td><td>1.62966</td></tr> <tr><td>O</td><td>2.03879</td><td>1.38476</td><td>1.28201</td></tr> <tr><td>C</td><td>1.74182</td><td>-0.94291</td><td>0.86416</td></tr> <tr><td>C</td><td>2.17551</td><td>-0.81254</td><td>-0.57714</td></tr> <tr><td>C</td><td>3.53372</td><td>-0.14524</td><td>-0.80071</td></tr> <tr><td>O</td><td>1.19013</td><td>-0.13312</td><td>-1.40642</td></tr> <tr><td>C</td><td>3.76309</td><td>0.68700</td><td>-1.90280</td></tr> <tr><td>C</td><td>4.61099</td><td>-0.43966</td><td>0.04641</td></tr> <tr><td>C</td><td>5.03154</td><td>1.22141</td><td>-2.14400</td></tr> <tr><td>C</td><td>5.88007</td><td>0.08638</td><td>-0.19565</td></tr> <tr><td>C</td><td>6.09735</td><td>0.92303</td><td>-1.29376</td></tr> <tr><td>H</td><td>-1.10047</td><td>-2.47551</td><td>-1.75387</td></tr> <tr><td>O</td><td>1.09034</td><td>0.09010</td><td>2.88802</td></tr> <tr><td>C</td><td>1.09003</td><td>1.25056</td><td>3.71919</td></tr> <tr><td>C</td><td>1.83247</td><td>-3.51186</td><td>0.95311</td></tr> </tbody> </table> |          |          | C | -4.64981 | 0.90419 | -0.28861 | O | -3.61373 | 1.38963 | -0.84159 | O | -4.71961 | -0.20556 | 0.30934 | C | -2.50142 | -3.07003 | 0.21353 | C | -1.20709 | -3.47526 | 0.45861 | N | -2.56257 | -1.74868 | 0.61463 | C | -1.35225 | -1.39254 | 1.07515 | N | -0.50557 | -2.41172 | 0.99592 | C | -5.92036 | 1.75467 | -0.33987 | C | -3.68558 | -3.80682 | -0.32589 | C | 1.25120 | -2.17986 | 1.39520 | C | 1.65552 | 0.25067 | 1.62966 | O | 2.03879 | 1.38476 | 1.28201 | C | 1.74182 | -0.94291 | 0.86416 | C | 2.17551 | -0.81254 | -0.57714 | C | 3.53372 | -0.14524 | -0.80071 | O | 1.19013 | -0.13312 | -1.40642 | C | 3.76309 | 0.68700 | -1.90280 | C | 4.61099 | -0.43966 | 0.04641 | C | 5.03154 | 1.22141 | -2.14400 | C | 5.88007 | 0.08638 | -0.19565 | C | 6.09735 | 0.92303 | -1.29376 | H | -1.10047 | -2.47551 | -1.75387 | O | 1.09034 | 0.09010 | 2.88802 | C | 1.09003 | 1.25056 | 3.71919 | C | 1.83247 | -3.51186 | 0.95311 |
| C                                              | -4.64981                                                                                                                                                                                                                                                                                                                                                                                                                                                                                                                                                                                                                                                                                                                                                                                                                                                                                                                                                                                                                                                                                                                                                                                                                                                                                                                                                                                                                                                                                                                                                                                                                                                                                                                                                                                                                                                                                                                                                                                           | 0.90419  | -0.28861 |   |          |         |          |   |          |         |          |   |          |          |         |   |          |          |         |   |          |          |         |   |          |          |         |   |          |          |         |   |          |          |         |   |          |         |          |   |          |          |          |   |         |          |         |   |         |         |         |   |         |         |         |   |         |          |         |   |         |          |          |   |         |          |          |   |         |          |          |   |         |         |          |   |         |          |         |   |         |         |          |   |         |         |          |   |         |         |          |   |          |          |          |   |         |         |         |   |         |         |         |   |         |          |         |
| O                                              | -3.61373                                                                                                                                                                                                                                                                                                                                                                                                                                                                                                                                                                                                                                                                                                                                                                                                                                                                                                                                                                                                                                                                                                                                                                                                                                                                                                                                                                                                                                                                                                                                                                                                                                                                                                                                                                                                                                                                                                                                                                                           | 1.38963  | -0.84159 |   |          |         |          |   |          |         |          |   |          |          |         |   |          |          |         |   |          |          |         |   |          |          |         |   |          |          |         |   |          |          |         |   |          |         |          |   |          |          |          |   |         |          |         |   |         |         |         |   |         |         |         |   |         |          |         |   |         |          |          |   |         |          |          |   |         |          |          |   |         |         |          |   |         |          |         |   |         |         |          |   |         |         |          |   |         |         |          |   |          |          |          |   |         |         |         |   |         |         |         |   |         |          |         |
| O                                              | -4.71961                                                                                                                                                                                                                                                                                                                                                                                                                                                                                                                                                                                                                                                                                                                                                                                                                                                                                                                                                                                                                                                                                                                                                                                                                                                                                                                                                                                                                                                                                                                                                                                                                                                                                                                                                                                                                                                                                                                                                                                           | -0.20556 | 0.30934  |   |          |         |          |   |          |         |          |   |          |          |         |   |          |          |         |   |          |          |         |   |          |          |         |   |          |          |         |   |          |          |         |   |          |         |          |   |          |          |          |   |         |          |         |   |         |         |         |   |         |         |         |   |         |          |         |   |         |          |          |   |         |          |          |   |         |          |          |   |         |         |          |   |         |          |         |   |         |         |          |   |         |         |          |   |         |         |          |   |          |          |          |   |         |         |         |   |         |         |         |   |         |          |         |
| C                                              | -2.50142                                                                                                                                                                                                                                                                                                                                                                                                                                                                                                                                                                                                                                                                                                                                                                                                                                                                                                                                                                                                                                                                                                                                                                                                                                                                                                                                                                                                                                                                                                                                                                                                                                                                                                                                                                                                                                                                                                                                                                                           | -3.07003 | 0.21353  |   |          |         |          |   |          |         |          |   |          |          |         |   |          |          |         |   |          |          |         |   |          |          |         |   |          |          |         |   |          |          |         |   |          |         |          |   |          |          |          |   |         |          |         |   |         |         |         |   |         |         |         |   |         |          |         |   |         |          |          |   |         |          |          |   |         |          |          |   |         |         |          |   |         |          |         |   |         |         |          |   |         |         |          |   |         |         |          |   |          |          |          |   |         |         |         |   |         |         |         |   |         |          |         |
| C                                              | -1.20709                                                                                                                                                                                                                                                                                                                                                                                                                                                                                                                                                                                                                                                                                                                                                                                                                                                                                                                                                                                                                                                                                                                                                                                                                                                                                                                                                                                                                                                                                                                                                                                                                                                                                                                                                                                                                                                                                                                                                                                           | -3.47526 | 0.45861  |   |          |         |          |   |          |         |          |   |          |          |         |   |          |          |         |   |          |          |         |   |          |          |         |   |          |          |         |   |          |          |         |   |          |         |          |   |          |          |          |   |         |          |         |   |         |         |         |   |         |         |         |   |         |          |         |   |         |          |          |   |         |          |          |   |         |          |          |   |         |         |          |   |         |          |         |   |         |         |          |   |         |         |          |   |         |         |          |   |          |          |          |   |         |         |         |   |         |         |         |   |         |          |         |
| N                                              | -2.56257                                                                                                                                                                                                                                                                                                                                                                                                                                                                                                                                                                                                                                                                                                                                                                                                                                                                                                                                                                                                                                                                                                                                                                                                                                                                                                                                                                                                                                                                                                                                                                                                                                                                                                                                                                                                                                                                                                                                                                                           | -1.74868 | 0.61463  |   |          |         |          |   |          |         |          |   |          |          |         |   |          |          |         |   |          |          |         |   |          |          |         |   |          |          |         |   |          |          |         |   |          |         |          |   |          |          |          |   |         |          |         |   |         |         |         |   |         |         |         |   |         |          |         |   |         |          |          |   |         |          |          |   |         |          |          |   |         |         |          |   |         |          |         |   |         |         |          |   |         |         |          |   |         |         |          |   |          |          |          |   |         |         |         |   |         |         |         |   |         |          |         |
| C                                              | -1.35225                                                                                                                                                                                                                                                                                                                                                                                                                                                                                                                                                                                                                                                                                                                                                                                                                                                                                                                                                                                                                                                                                                                                                                                                                                                                                                                                                                                                                                                                                                                                                                                                                                                                                                                                                                                                                                                                                                                                                                                           | -1.39254 | 1.07515  |   |          |         |          |   |          |         |          |   |          |          |         |   |          |          |         |   |          |          |         |   |          |          |         |   |          |          |         |   |          |          |         |   |          |         |          |   |          |          |          |   |         |          |         |   |         |         |         |   |         |         |         |   |         |          |         |   |         |          |          |   |         |          |          |   |         |          |          |   |         |         |          |   |         |          |         |   |         |         |          |   |         |         |          |   |         |         |          |   |          |          |          |   |         |         |         |   |         |         |         |   |         |          |         |
| N                                              | -0.50557                                                                                                                                                                                                                                                                                                                                                                                                                                                                                                                                                                                                                                                                                                                                                                                                                                                                                                                                                                                                                                                                                                                                                                                                                                                                                                                                                                                                                                                                                                                                                                                                                                                                                                                                                                                                                                                                                                                                                                                           | -2.41172 | 0.99592  |   |          |         |          |   |          |         |          |   |          |          |         |   |          |          |         |   |          |          |         |   |          |          |         |   |          |          |         |   |          |          |         |   |          |         |          |   |          |          |          |   |         |          |         |   |         |         |         |   |         |         |         |   |         |          |         |   |         |          |          |   |         |          |          |   |         |          |          |   |         |         |          |   |         |          |         |   |         |         |          |   |         |         |          |   |         |         |          |   |          |          |          |   |         |         |         |   |         |         |         |   |         |          |         |
| C                                              | -5.92036                                                                                                                                                                                                                                                                                                                                                                                                                                                                                                                                                                                                                                                                                                                                                                                                                                                                                                                                                                                                                                                                                                                                                                                                                                                                                                                                                                                                                                                                                                                                                                                                                                                                                                                                                                                                                                                                                                                                                                                           | 1.75467  | -0.33987 |   |          |         |          |   |          |         |          |   |          |          |         |   |          |          |         |   |          |          |         |   |          |          |         |   |          |          |         |   |          |          |         |   |          |         |          |   |          |          |          |   |         |          |         |   |         |         |         |   |         |         |         |   |         |          |         |   |         |          |          |   |         |          |          |   |         |          |          |   |         |         |          |   |         |          |         |   |         |         |          |   |         |         |          |   |         |         |          |   |          |          |          |   |         |         |         |   |         |         |         |   |         |          |         |
| C                                              | -3.68558                                                                                                                                                                                                                                                                                                                                                                                                                                                                                                                                                                                                                                                                                                                                                                                                                                                                                                                                                                                                                                                                                                                                                                                                                                                                                                                                                                                                                                                                                                                                                                                                                                                                                                                                                                                                                                                                                                                                                                                           | -3.80682 | -0.32589 |   |          |         |          |   |          |         |          |   |          |          |         |   |          |          |         |   |          |          |         |   |          |          |         |   |          |          |         |   |          |          |         |   |          |         |          |   |          |          |          |   |         |          |         |   |         |         |         |   |         |         |         |   |         |          |         |   |         |          |          |   |         |          |          |   |         |          |          |   |         |         |          |   |         |          |         |   |         |         |          |   |         |         |          |   |         |         |          |   |          |          |          |   |         |         |         |   |         |         |         |   |         |          |         |
| C                                              | 1.25120                                                                                                                                                                                                                                                                                                                                                                                                                                                                                                                                                                                                                                                                                                                                                                                                                                                                                                                                                                                                                                                                                                                                                                                                                                                                                                                                                                                                                                                                                                                                                                                                                                                                                                                                                                                                                                                                                                                                                                                            | -2.17986 | 1.39520  |   |          |         |          |   |          |         |          |   |          |          |         |   |          |          |         |   |          |          |         |   |          |          |         |   |          |          |         |   |          |          |         |   |          |         |          |   |          |          |          |   |         |          |         |   |         |         |         |   |         |         |         |   |         |          |         |   |         |          |          |   |         |          |          |   |         |          |          |   |         |         |          |   |         |          |         |   |         |         |          |   |         |         |          |   |         |         |          |   |          |          |          |   |         |         |         |   |         |         |         |   |         |          |         |
| C                                              | 1.65552                                                                                                                                                                                                                                                                                                                                                                                                                                                                                                                                                                                                                                                                                                                                                                                                                                                                                                                                                                                                                                                                                                                                                                                                                                                                                                                                                                                                                                                                                                                                                                                                                                                                                                                                                                                                                                                                                                                                                                                            | 0.25067  | 1.62966  |   |          |         |          |   |          |         |          |   |          |          |         |   |          |          |         |   |          |          |         |   |          |          |         |   |          |          |         |   |          |          |         |   |          |         |          |   |          |          |          |   |         |          |         |   |         |         |         |   |         |         |         |   |         |          |         |   |         |          |          |   |         |          |          |   |         |          |          |   |         |         |          |   |         |          |         |   |         |         |          |   |         |         |          |   |         |         |          |   |          |          |          |   |         |         |         |   |         |         |         |   |         |          |         |
| O                                              | 2.03879                                                                                                                                                                                                                                                                                                                                                                                                                                                                                                                                                                                                                                                                                                                                                                                                                                                                                                                                                                                                                                                                                                                                                                                                                                                                                                                                                                                                                                                                                                                                                                                                                                                                                                                                                                                                                                                                                                                                                                                            | 1.38476  | 1.28201  |   |          |         |          |   |          |         |          |   |          |          |         |   |          |          |         |   |          |          |         |   |          |          |         |   |          |          |         |   |          |          |         |   |          |         |          |   |          |          |          |   |         |          |         |   |         |         |         |   |         |         |         |   |         |          |         |   |         |          |          |   |         |          |          |   |         |          |          |   |         |         |          |   |         |          |         |   |         |         |          |   |         |         |          |   |         |         |          |   |          |          |          |   |         |         |         |   |         |         |         |   |         |          |         |
| C                                              | 1.74182                                                                                                                                                                                                                                                                                                                                                                                                                                                                                                                                                                                                                                                                                                                                                                                                                                                                                                                                                                                                                                                                                                                                                                                                                                                                                                                                                                                                                                                                                                                                                                                                                                                                                                                                                                                                                                                                                                                                                                                            | -0.94291 | 0.86416  |   |          |         |          |   |          |         |          |   |          |          |         |   |          |          |         |   |          |          |         |   |          |          |         |   |          |          |         |   |          |          |         |   |          |         |          |   |          |          |          |   |         |          |         |   |         |         |         |   |         |         |         |   |         |          |         |   |         |          |          |   |         |          |          |   |         |          |          |   |         |         |          |   |         |          |         |   |         |         |          |   |         |         |          |   |         |         |          |   |          |          |          |   |         |         |         |   |         |         |         |   |         |          |         |
| C                                              | 2.17551                                                                                                                                                                                                                                                                                                                                                                                                                                                                                                                                                                                                                                                                                                                                                                                                                                                                                                                                                                                                                                                                                                                                                                                                                                                                                                                                                                                                                                                                                                                                                                                                                                                                                                                                                                                                                                                                                                                                                                                            | -0.81254 | -0.57714 |   |          |         |          |   |          |         |          |   |          |          |         |   |          |          |         |   |          |          |         |   |          |          |         |   |          |          |         |   |          |          |         |   |          |         |          |   |          |          |          |   |         |          |         |   |         |         |         |   |         |         |         |   |         |          |         |   |         |          |          |   |         |          |          |   |         |          |          |   |         |         |          |   |         |          |         |   |         |         |          |   |         |         |          |   |         |         |          |   |          |          |          |   |         |         |         |   |         |         |         |   |         |          |         |
| C                                              | 3.53372                                                                                                                                                                                                                                                                                                                                                                                                                                                                                                                                                                                                                                                                                                                                                                                                                                                                                                                                                                                                                                                                                                                                                                                                                                                                                                                                                                                                                                                                                                                                                                                                                                                                                                                                                                                                                                                                                                                                                                                            | -0.14524 | -0.80071 |   |          |         |          |   |          |         |          |   |          |          |         |   |          |          |         |   |          |          |         |   |          |          |         |   |          |          |         |   |          |          |         |   |          |         |          |   |          |          |          |   |         |          |         |   |         |         |         |   |         |         |         |   |         |          |         |   |         |          |          |   |         |          |          |   |         |          |          |   |         |         |          |   |         |          |         |   |         |         |          |   |         |         |          |   |         |         |          |   |          |          |          |   |         |         |         |   |         |         |         |   |         |          |         |
| O                                              | 1.19013                                                                                                                                                                                                                                                                                                                                                                                                                                                                                                                                                                                                                                                                                                                                                                                                                                                                                                                                                                                                                                                                                                                                                                                                                                                                                                                                                                                                                                                                                                                                                                                                                                                                                                                                                                                                                                                                                                                                                                                            | -0.13312 | -1.40642 |   |          |         |          |   |          |         |          |   |          |          |         |   |          |          |         |   |          |          |         |   |          |          |         |   |          |          |         |   |          |          |         |   |          |         |          |   |          |          |          |   |         |          |         |   |         |         |         |   |         |         |         |   |         |          |         |   |         |          |          |   |         |          |          |   |         |          |          |   |         |         |          |   |         |          |         |   |         |         |          |   |         |         |          |   |         |         |          |   |          |          |          |   |         |         |         |   |         |         |         |   |         |          |         |
| C                                              | 3.76309                                                                                                                                                                                                                                                                                                                                                                                                                                                                                                                                                                                                                                                                                                                                                                                                                                                                                                                                                                                                                                                                                                                                                                                                                                                                                                                                                                                                                                                                                                                                                                                                                                                                                                                                                                                                                                                                                                                                                                                            | 0.68700  | -1.90280 |   |          |         |          |   |          |         |          |   |          |          |         |   |          |          |         |   |          |          |         |   |          |          |         |   |          |          |         |   |          |          |         |   |          |         |          |   |          |          |          |   |         |          |         |   |         |         |         |   |         |         |         |   |         |          |         |   |         |          |          |   |         |          |          |   |         |          |          |   |         |         |          |   |         |          |         |   |         |         |          |   |         |         |          |   |         |         |          |   |          |          |          |   |         |         |         |   |         |         |         |   |         |          |         |
| C                                              | 4.61099                                                                                                                                                                                                                                                                                                                                                                                                                                                                                                                                                                                                                                                                                                                                                                                                                                                                                                                                                                                                                                                                                                                                                                                                                                                                                                                                                                                                                                                                                                                                                                                                                                                                                                                                                                                                                                                                                                                                                                                            | -0.43966 | 0.04641  |   |          |         |          |   |          |         |          |   |          |          |         |   |          |          |         |   |          |          |         |   |          |          |         |   |          |          |         |   |          |          |         |   |          |         |          |   |          |          |          |   |         |          |         |   |         |         |         |   |         |         |         |   |         |          |         |   |         |          |          |   |         |          |          |   |         |          |          |   |         |         |          |   |         |          |         |   |         |         |          |   |         |         |          |   |         |         |          |   |          |          |          |   |         |         |         |   |         |         |         |   |         |          |         |
| C                                              | 5.03154                                                                                                                                                                                                                                                                                                                                                                                                                                                                                                                                                                                                                                                                                                                                                                                                                                                                                                                                                                                                                                                                                                                                                                                                                                                                                                                                                                                                                                                                                                                                                                                                                                                                                                                                                                                                                                                                                                                                                                                            | 1.22141  | -2.14400 |   |          |         |          |   |          |         |          |   |          |          |         |   |          |          |         |   |          |          |         |   |          |          |         |   |          |          |         |   |          |          |         |   |          |         |          |   |          |          |          |   |         |          |         |   |         |         |         |   |         |         |         |   |         |          |         |   |         |          |          |   |         |          |          |   |         |          |          |   |         |         |          |   |         |          |         |   |         |         |          |   |         |         |          |   |         |         |          |   |          |          |          |   |         |         |         |   |         |         |         |   |         |          |         |
| C                                              | 5.88007                                                                                                                                                                                                                                                                                                                                                                                                                                                                                                                                                                                                                                                                                                                                                                                                                                                                                                                                                                                                                                                                                                                                                                                                                                                                                                                                                                                                                                                                                                                                                                                                                                                                                                                                                                                                                                                                                                                                                                                            | 0.08638  | -0.19565 |   |          |         |          |   |          |         |          |   |          |          |         |   |          |          |         |   |          |          |         |   |          |          |         |   |          |          |         |   |          |          |         |   |          |         |          |   |          |          |          |   |         |          |         |   |         |         |         |   |         |         |         |   |         |          |         |   |         |          |          |   |         |          |          |   |         |          |          |   |         |         |          |   |         |          |         |   |         |         |          |   |         |         |          |   |         |         |          |   |          |          |          |   |         |         |         |   |         |         |         |   |         |          |         |
| C                                              | 6.09735                                                                                                                                                                                                                                                                                                                                                                                                                                                                                                                                                                                                                                                                                                                                                                                                                                                                                                                                                                                                                                                                                                                                                                                                                                                                                                                                                                                                                                                                                                                                                                                                                                                                                                                                                                                                                                                                                                                                                                                            | 0.92303  | -1.29376 |   |          |         |          |   |          |         |          |   |          |          |         |   |          |          |         |   |          |          |         |   |          |          |         |   |          |          |         |   |          |          |         |   |          |         |          |   |          |          |          |   |         |          |         |   |         |         |         |   |         |         |         |   |         |          |         |   |         |          |          |   |         |          |          |   |         |          |          |   |         |         |          |   |         |          |         |   |         |         |          |   |         |         |          |   |         |         |          |   |          |          |          |   |         |         |         |   |         |         |         |   |         |          |         |
| H                                              | -1.10047                                                                                                                                                                                                                                                                                                                                                                                                                                                                                                                                                                                                                                                                                                                                                                                                                                                                                                                                                                                                                                                                                                                                                                                                                                                                                                                                                                                                                                                                                                                                                                                                                                                                                                                                                                                                                                                                                                                                                                                           | -2.47551 | -1.75387 |   |          |         |          |   |          |         |          |   |          |          |         |   |          |          |         |   |          |          |         |   |          |          |         |   |          |          |         |   |          |          |         |   |          |         |          |   |          |          |          |   |         |          |         |   |         |         |         |   |         |         |         |   |         |          |         |   |         |          |          |   |         |          |          |   |         |          |          |   |         |         |          |   |         |          |         |   |         |         |          |   |         |         |          |   |         |         |          |   |          |          |          |   |         |         |         |   |         |         |         |   |         |          |         |
| O                                              | 1.09034                                                                                                                                                                                                                                                                                                                                                                                                                                                                                                                                                                                                                                                                                                                                                                                                                                                                                                                                                                                                                                                                                                                                                                                                                                                                                                                                                                                                                                                                                                                                                                                                                                                                                                                                                                                                                                                                                                                                                                                            | 0.09010  | 2.88802  |   |          |         |          |   |          |         |          |   |          |          |         |   |          |          |         |   |          |          |         |   |          |          |         |   |          |          |         |   |          |          |         |   |          |         |          |   |          |          |          |   |         |          |         |   |         |         |         |   |         |         |         |   |         |          |         |   |         |          |          |   |         |          |          |   |         |          |          |   |         |         |          |   |         |          |         |   |         |         |          |   |         |         |          |   |         |         |          |   |          |          |          |   |         |         |         |   |         |         |         |   |         |          |         |
| C                                              | 1.09003                                                                                                                                                                                                                                                                                                                                                                                                                                                                                                                                                                                                                                                                                                                                                                                                                                                                                                                                                                                                                                                                                                                                                                                                                                                                                                                                                                                                                                                                                                                                                                                                                                                                                                                                                                                                                                                                                                                                                                                            | 1.25056  | 3.71919  |   |          |         |          |   |          |         |          |   |          |          |         |   |          |          |         |   |          |          |         |   |          |          |         |   |          |          |         |   |          |          |         |   |          |         |          |   |          |          |          |   |         |          |         |   |         |         |         |   |         |         |         |   |         |          |         |   |         |          |          |   |         |          |          |   |         |          |          |   |         |         |          |   |         |          |         |   |         |         |          |   |         |         |          |   |         |         |          |   |          |          |          |   |         |         |         |   |         |         |         |   |         |          |         |
| C                                              | 1.83247                                                                                                                                                                                                                                                                                                                                                                                                                                                                                                                                                                                                                                                                                                                                                                                                                                                                                                                                                                                                                                                                                                                                                                                                                                                                                                                                                                                                                                                                                                                                                                                                                                                                                                                                                                                                                                                                                                                                                                                            | -3.51186 | 0.95311  |   |          |         |          |   |          |         |          |   |          |          |         |   |          |          |         |   |          |          |         |   |          |          |         |   |          |          |         |   |          |          |         |   |          |         |          |   |          |          |          |   |         |          |         |   |         |         |         |   |         |         |         |   |         |          |         |   |         |          |          |   |         |          |          |   |         |          |          |   |         |         |          |   |         |          |         |   |         |         |          |   |         |         |          |   |         |         |          |   |          |          |          |   |         |         |         |   |         |         |         |   |         |          |         |



|   |          |          |          |
|---|----------|----------|----------|
| N | -0.87348 | 1.52826  | -0.38094 |
| N | 0.38105  | 3.38621  | 0.19215  |
| H | 6.69985  | -0.15358 | 0.47752  |
| H | 7.08478  | 1.33690  | -1.48239 |
| H | 5.18557  | 1.87180  | -3.00212 |
| H | 2.93680  | 0.91609  | -2.56608 |
| H | 4.44281  | -1.07625 | 0.91097  |
| H | 2.89267  | -3.53700 | 1.22670  |
| H | 1.76327  | -3.67310 | -0.12665 |
| H | 1.33865  | -4.34782 | 1.45818  |
| H | 2.27429  | -1.82559 | -0.98958 |
| H | 1.11475  | -2.14378 | 2.47224  |
| H | -0.75523 | -4.44259 | 0.30054  |
| H | -4.45946 | -3.92869 | 0.44095  |
| H | -4.14107 | -3.27417 | -1.16790 |
| H | -3.38788 | -4.80147 | -0.66798 |
| H | -1.09672 | -0.40734 | 1.43102  |
| H | -0.02744 | 0.99986  | -0.64021 |
| H | 1.11008  | 2.74661  | 0.53812  |
| H | -5.82226 | 2.59483  | 0.35919  |
| H | 0.62475  | 0.94102  | 4.65741  |
| H | 2.10781  | 1.60666  | 3.90756  |
| H | -6.05428 | 2.17814  | -1.34021 |
| H | 0.51352  | 2.06521  | 3.26970  |
| H | -6.80062 | 1.17149  | -0.06011 |
| O | -0.68798 | -1.92097 | -2.43930 |
| H | 0.56299  | -0.81238 | -1.74378 |
| C | -1.72475 | -1.25003 | -3.16599 |
| H | -2.37605 | -1.96873 | -3.67925 |
| H | -1.22944 | -0.62971 | -3.91619 |
| H | -2.33490 | -0.60620 | -2.52022 |
| H | -3.40096 | -1.09491 | 0.49690  |
| H | -1.80274 | 1.16482  | -0.62431 |
| H | 0.42215  | 4.34870  | 0.49188  |
| C | -0.80526 | 2.83825  | -0.12374 |
| N | -1.92784 | 3.56944  | -0.19123 |
| H | -2.76465 | 3.05085  | -0.48024 |
| C | -2.02795 | 4.96236  | 0.20949  |
| H | -1.41892 | 5.61370  | -0.42912 |
| H | -1.72978 | 5.10846  | 1.25545  |
| H | -3.06951 | 5.26973  | 0.10752  |

Optimized Molecular Properties for TArgHis-TS3-1

|                                                |                                                                                                                                                                                                                                                                                                                                                                                                                                                                                                                                                                                                                                                                                                                                                                                                                                                                                                                                                                                                                                                                                                                                                                                                                                                                                                                                                                                                                                                                                                                                                                                                                                                                                                                                                                                                                                                                                                                                                                                                |          |          |          |          |   |         |          |          |   |         |          |         |   |         |         |         |   |         |         |          |   |         |          |          |   |         |         |          |   |         |         |         |   |          |          |         |   |         |         |          |   |          |         |          |   |          |         |          |   |          |          |          |   |          |         |          |   |          |         |         |   |          |         |          |   |          |         |         |   |          |         |         |   |         |          |          |   |         |         |         |   |         |          |         |   |         |         |          |   |          |          |          |   |          |          |         |   |          |         |         |   |          |         |         |
|------------------------------------------------|------------------------------------------------------------------------------------------------------------------------------------------------------------------------------------------------------------------------------------------------------------------------------------------------------------------------------------------------------------------------------------------------------------------------------------------------------------------------------------------------------------------------------------------------------------------------------------------------------------------------------------------------------------------------------------------------------------------------------------------------------------------------------------------------------------------------------------------------------------------------------------------------------------------------------------------------------------------------------------------------------------------------------------------------------------------------------------------------------------------------------------------------------------------------------------------------------------------------------------------------------------------------------------------------------------------------------------------------------------------------------------------------------------------------------------------------------------------------------------------------------------------------------------------------------------------------------------------------------------------------------------------------------------------------------------------------------------------------------------------------------------------------------------------------------------------------------------------------------------------------------------------------------------------------------------------------------------------------------------------------|----------|----------|----------|----------|---|---------|----------|----------|---|---------|----------|---------|---|---------|---------|---------|---|---------|---------|----------|---|---------|----------|----------|---|---------|---------|----------|---|---------|---------|---------|---|----------|----------|---------|---|---------|---------|----------|---|----------|---------|----------|---|----------|---------|----------|---|----------|----------|----------|---|----------|---------|----------|---|----------|---------|---------|---|----------|---------|----------|---|----------|---------|---------|---|----------|---------|---------|---|---------|----------|----------|---|---------|---------|---------|---|---------|----------|---------|---|---------|---------|----------|---|----------|----------|----------|---|----------|----------|---------|---|----------|---------|---------|---|----------|---------|---------|
| Number of<br>(-)<br>Vibrational<br>Frequencies | 1 (-1197.114)                                                                                                                                                                                                                                                                                                                                                                                                                                                                                                                                                                                                                                                                                                                                                                                                                                                                                                                                                                                                                                                                                                                                                                                                                                                                                                                                                                                                                                                                                                                                                                                                                                                                                                                                                                                                                                                                                                                                                                                  |          |          |          |          |   |         |          |          |   |         |          |         |   |         |         |         |   |         |         |          |   |         |          |          |   |         |         |          |   |         |         |         |   |          |          |         |   |         |         |          |   |          |         |          |   |          |         |          |   |          |          |          |   |          |         |          |   |          |         |         |   |          |         |          |   |          |         |         |   |          |         |         |   |         |          |          |   |         |         |         |   |         |          |         |   |         |         |          |   |          |          |          |   |          |          |         |   |          |         |         |   |          |         |         |
| Absolute<br>Energies<br>(Hartrees)             | <p><b>B3LYP/6-31G(d) (PCM)</b></p> <p>There are 13 positive frequencies below 100 cm<sup>-1</sup>.</p> <p>Zero-point correction: 0.510809 hartree<br/>         Enthalpy correction: 0.543856 hartree<br/>         Free Energy correction: 0.447769 hartree<br/>         Quasiharmonic Free Energy correction: 0.455825 hartree</p> <p>SCF Energy: -1317.773791 hartree<br/>         SCF Energy + ZPVE: -1317.262982 hartree<br/>         Enthalpy: -1317.229935 hartree<br/>         Free Energy: -1317.326022 hartree</p> <p>Free Energy with quasiharmonic correction: -1317.317966 hartree<br/>         (correction: 5.06 kcal/mol)</p> <p><b>B3LYP-D3/6-311+G(d,p) (PCM)</b></p> <p>SCF Done: E(RB3LYP) = -1318.23873771 A.U.</p>                                                                                                                                                                                                                                                                                                                                                                                                                                                                                                                                                                                                                                                                                                                                                                                                                                                                                                                                                                                                                                                                                                                                                                                                                                                          |          |          |          |          |   |         |          |          |   |         |          |         |   |         |         |         |   |         |         |          |   |         |          |          |   |         |         |          |   |         |         |         |   |          |          |         |   |         |         |          |   |          |         |          |   |          |         |          |   |          |          |          |   |          |         |          |   |          |         |         |   |          |         |          |   |          |         |         |   |          |         |         |   |         |          |          |   |         |         |         |   |         |          |         |   |         |         |          |   |          |          |          |   |          |          |         |   |          |         |         |   |          |         |         |
| Cartesian<br>Coordinates                       | <p>(PCM)</p> <p>60</p> <p>spD3-TS3-meoh-TArgHis.out Energy: -827207.2903156</p> <table> <tbody> <tr><td>C</td><td>4.92734</td><td>-1.05794</td><td>-0.40868</td></tr> <tr><td>C</td><td>3.67825</td><td>-0.70269</td><td>-0.83796</td></tr> <tr><td>N</td><td>5.30049</td><td>-0.07755</td><td>0.50105</td></tr> <tr><td>C</td><td>4.31954</td><td>0.82790</td><td>0.62023</td></tr> <tr><td>N</td><td>3.32267</td><td>0.46803</td><td>-0.18319</td></tr> <tr><td>C</td><td>5.79805</td><td>-2.21702</td><td>-0.75987</td></tr> <tr><td>C</td><td>2.06504</td><td>1.27083</td><td>-0.39398</td></tr> <tr><td>C</td><td>0.51043</td><td>0.06811</td><td>1.20051</td></tr> <tr><td>O</td><td>-0.52321</td><td>-0.44813</td><td>1.62910</td></tr> <tr><td>C</td><td>0.81767</td><td>0.39300</td><td>-0.19480</td></tr> <tr><td>C</td><td>-0.41427</td><td>0.74647</td><td>-1.06302</td></tr> <tr><td>C</td><td>-1.34035</td><td>1.86448</td><td>-0.59156</td></tr> <tr><td>O</td><td>-1.21433</td><td>-0.42655</td><td>-1.31613</td></tr> <tr><td>C</td><td>-2.51676</td><td>2.11405</td><td>-1.31759</td></tr> <tr><td>C</td><td>-1.03850</td><td>2.70587</td><td>0.48474</td></tr> <tr><td>C</td><td>-3.37090</td><td>3.15850</td><td>-0.96783</td></tr> <tr><td>C</td><td>-1.88987</td><td>3.75772</td><td>0.83689</td></tr> <tr><td>C</td><td>-3.06067</td><td>3.98630</td><td>0.11505</td></tr> <tr><td>H</td><td>1.03652</td><td>-0.82049</td><td>-0.78470</td></tr> <tr><td>O</td><td>1.53995</td><td>0.33448</td><td>2.06042</td></tr> <tr><td>C</td><td>1.33843</td><td>-0.06347</td><td>3.42559</td></tr> <tr><td>C</td><td>2.19888</td><td>1.96366</td><td>-1.75781</td></tr> <tr><td>N</td><td>-3.78994</td><td>-1.32637</td><td>-0.86842</td></tr> <tr><td>N</td><td>-2.86842</td><td>-1.87116</td><td>1.17569</td></tr> <tr><td>H</td><td>-1.63514</td><td>4.39545</td><td>1.67932</td></tr> <tr><td>H</td><td>-3.72343</td><td>4.80277</td><td>0.38863</td></tr> </tbody> </table> | C        | 4.92734  | -1.05794 | -0.40868 | C | 3.67825 | -0.70269 | -0.83796 | N | 5.30049 | -0.07755 | 0.50105 | C | 4.31954 | 0.82790 | 0.62023 | N | 3.32267 | 0.46803 | -0.18319 | C | 5.79805 | -2.21702 | -0.75987 | C | 2.06504 | 1.27083 | -0.39398 | C | 0.51043 | 0.06811 | 1.20051 | O | -0.52321 | -0.44813 | 1.62910 | C | 0.81767 | 0.39300 | -0.19480 | C | -0.41427 | 0.74647 | -1.06302 | C | -1.34035 | 1.86448 | -0.59156 | O | -1.21433 | -0.42655 | -1.31613 | C | -2.51676 | 2.11405 | -1.31759 | C | -1.03850 | 2.70587 | 0.48474 | C | -3.37090 | 3.15850 | -0.96783 | C | -1.88987 | 3.75772 | 0.83689 | C | -3.06067 | 3.98630 | 0.11505 | H | 1.03652 | -0.82049 | -0.78470 | O | 1.53995 | 0.33448 | 2.06042 | C | 1.33843 | -0.06347 | 3.42559 | C | 2.19888 | 1.96366 | -1.75781 | N | -3.78994 | -1.32637 | -0.86842 | N | -2.86842 | -1.87116 | 1.17569 | H | -1.63514 | 4.39545 | 1.67932 | H | -3.72343 | 4.80277 | 0.38863 |
| C                                              | 4.92734                                                                                                                                                                                                                                                                                                                                                                                                                                                                                                                                                                                                                                                                                                                                                                                                                                                                                                                                                                                                                                                                                                                                                                                                                                                                                                                                                                                                                                                                                                                                                                                                                                                                                                                                                                                                                                                                                                                                                                                        | -1.05794 | -0.40868 |          |          |   |         |          |          |   |         |          |         |   |         |         |         |   |         |         |          |   |         |          |          |   |         |         |          |   |         |         |         |   |          |          |         |   |         |         |          |   |          |         |          |   |          |         |          |   |          |          |          |   |          |         |          |   |          |         |         |   |          |         |          |   |          |         |         |   |          |         |         |   |         |          |          |   |         |         |         |   |         |          |         |   |         |         |          |   |          |          |          |   |          |          |         |   |          |         |         |   |          |         |         |
| C                                              | 3.67825                                                                                                                                                                                                                                                                                                                                                                                                                                                                                                                                                                                                                                                                                                                                                                                                                                                                                                                                                                                                                                                                                                                                                                                                                                                                                                                                                                                                                                                                                                                                                                                                                                                                                                                                                                                                                                                                                                                                                                                        | -0.70269 | -0.83796 |          |          |   |         |          |          |   |         |          |         |   |         |         |         |   |         |         |          |   |         |          |          |   |         |         |          |   |         |         |         |   |          |          |         |   |         |         |          |   |          |         |          |   |          |         |          |   |          |          |          |   |          |         |          |   |          |         |         |   |          |         |          |   |          |         |         |   |          |         |         |   |         |          |          |   |         |         |         |   |         |          |         |   |         |         |          |   |          |          |          |   |          |          |         |   |          |         |         |   |          |         |         |
| N                                              | 5.30049                                                                                                                                                                                                                                                                                                                                                                                                                                                                                                                                                                                                                                                                                                                                                                                                                                                                                                                                                                                                                                                                                                                                                                                                                                                                                                                                                                                                                                                                                                                                                                                                                                                                                                                                                                                                                                                                                                                                                                                        | -0.07755 | 0.50105  |          |          |   |         |          |          |   |         |          |         |   |         |         |         |   |         |         |          |   |         |          |          |   |         |         |          |   |         |         |         |   |          |          |         |   |         |         |          |   |          |         |          |   |          |         |          |   |          |          |          |   |          |         |          |   |          |         |         |   |          |         |          |   |          |         |         |   |          |         |         |   |         |          |          |   |         |         |         |   |         |          |         |   |         |         |          |   |          |          |          |   |          |          |         |   |          |         |         |   |          |         |         |
| C                                              | 4.31954                                                                                                                                                                                                                                                                                                                                                                                                                                                                                                                                                                                                                                                                                                                                                                                                                                                                                                                                                                                                                                                                                                                                                                                                                                                                                                                                                                                                                                                                                                                                                                                                                                                                                                                                                                                                                                                                                                                                                                                        | 0.82790  | 0.62023  |          |          |   |         |          |          |   |         |          |         |   |         |         |         |   |         |         |          |   |         |          |          |   |         |         |          |   |         |         |         |   |          |          |         |   |         |         |          |   |          |         |          |   |          |         |          |   |          |          |          |   |          |         |          |   |          |         |         |   |          |         |          |   |          |         |         |   |          |         |         |   |         |          |          |   |         |         |         |   |         |          |         |   |         |         |          |   |          |          |          |   |          |          |         |   |          |         |         |   |          |         |         |
| N                                              | 3.32267                                                                                                                                                                                                                                                                                                                                                                                                                                                                                                                                                                                                                                                                                                                                                                                                                                                                                                                                                                                                                                                                                                                                                                                                                                                                                                                                                                                                                                                                                                                                                                                                                                                                                                                                                                                                                                                                                                                                                                                        | 0.46803  | -0.18319 |          |          |   |         |          |          |   |         |          |         |   |         |         |         |   |         |         |          |   |         |          |          |   |         |         |          |   |         |         |         |   |          |          |         |   |         |         |          |   |          |         |          |   |          |         |          |   |          |          |          |   |          |         |          |   |          |         |         |   |          |         |          |   |          |         |         |   |          |         |         |   |         |          |          |   |         |         |         |   |         |          |         |   |         |         |          |   |          |          |          |   |          |          |         |   |          |         |         |   |          |         |         |
| C                                              | 5.79805                                                                                                                                                                                                                                                                                                                                                                                                                                                                                                                                                                                                                                                                                                                                                                                                                                                                                                                                                                                                                                                                                                                                                                                                                                                                                                                                                                                                                                                                                                                                                                                                                                                                                                                                                                                                                                                                                                                                                                                        | -2.21702 | -0.75987 |          |          |   |         |          |          |   |         |          |         |   |         |         |         |   |         |         |          |   |         |          |          |   |         |         |          |   |         |         |         |   |          |          |         |   |         |         |          |   |          |         |          |   |          |         |          |   |          |          |          |   |          |         |          |   |          |         |         |   |          |         |          |   |          |         |         |   |          |         |         |   |         |          |          |   |         |         |         |   |         |          |         |   |         |         |          |   |          |          |          |   |          |          |         |   |          |         |         |   |          |         |         |
| C                                              | 2.06504                                                                                                                                                                                                                                                                                                                                                                                                                                                                                                                                                                                                                                                                                                                                                                                                                                                                                                                                                                                                                                                                                                                                                                                                                                                                                                                                                                                                                                                                                                                                                                                                                                                                                                                                                                                                                                                                                                                                                                                        | 1.27083  | -0.39398 |          |          |   |         |          |          |   |         |          |         |   |         |         |         |   |         |         |          |   |         |          |          |   |         |         |          |   |         |         |         |   |          |          |         |   |         |         |          |   |          |         |          |   |          |         |          |   |          |          |          |   |          |         |          |   |          |         |         |   |          |         |          |   |          |         |         |   |          |         |         |   |         |          |          |   |         |         |         |   |         |          |         |   |         |         |          |   |          |          |          |   |          |          |         |   |          |         |         |   |          |         |         |
| C                                              | 0.51043                                                                                                                                                                                                                                                                                                                                                                                                                                                                                                                                                                                                                                                                                                                                                                                                                                                                                                                                                                                                                                                                                                                                                                                                                                                                                                                                                                                                                                                                                                                                                                                                                                                                                                                                                                                                                                                                                                                                                                                        | 0.06811  | 1.20051  |          |          |   |         |          |          |   |         |          |         |   |         |         |         |   |         |         |          |   |         |          |          |   |         |         |          |   |         |         |         |   |          |          |         |   |         |         |          |   |          |         |          |   |          |         |          |   |          |          |          |   |          |         |          |   |          |         |         |   |          |         |          |   |          |         |         |   |          |         |         |   |         |          |          |   |         |         |         |   |         |          |         |   |         |         |          |   |          |          |          |   |          |          |         |   |          |         |         |   |          |         |         |
| O                                              | -0.52321                                                                                                                                                                                                                                                                                                                                                                                                                                                                                                                                                                                                                                                                                                                                                                                                                                                                                                                                                                                                                                                                                                                                                                                                                                                                                                                                                                                                                                                                                                                                                                                                                                                                                                                                                                                                                                                                                                                                                                                       | -0.44813 | 1.62910  |          |          |   |         |          |          |   |         |          |         |   |         |         |         |   |         |         |          |   |         |          |          |   |         |         |          |   |         |         |         |   |          |          |         |   |         |         |          |   |          |         |          |   |          |         |          |   |          |          |          |   |          |         |          |   |          |         |         |   |          |         |          |   |          |         |         |   |          |         |         |   |         |          |          |   |         |         |         |   |         |          |         |   |         |         |          |   |          |          |          |   |          |          |         |   |          |         |         |   |          |         |         |
| C                                              | 0.81767                                                                                                                                                                                                                                                                                                                                                                                                                                                                                                                                                                                                                                                                                                                                                                                                                                                                                                                                                                                                                                                                                                                                                                                                                                                                                                                                                                                                                                                                                                                                                                                                                                                                                                                                                                                                                                                                                                                                                                                        | 0.39300  | -0.19480 |          |          |   |         |          |          |   |         |          |         |   |         |         |         |   |         |         |          |   |         |          |          |   |         |         |          |   |         |         |         |   |          |          |         |   |         |         |          |   |          |         |          |   |          |         |          |   |          |          |          |   |          |         |          |   |          |         |         |   |          |         |          |   |          |         |         |   |          |         |         |   |         |          |          |   |         |         |         |   |         |          |         |   |         |         |          |   |          |          |          |   |          |          |         |   |          |         |         |   |          |         |         |
| C                                              | -0.41427                                                                                                                                                                                                                                                                                                                                                                                                                                                                                                                                                                                                                                                                                                                                                                                                                                                                                                                                                                                                                                                                                                                                                                                                                                                                                                                                                                                                                                                                                                                                                                                                                                                                                                                                                                                                                                                                                                                                                                                       | 0.74647  | -1.06302 |          |          |   |         |          |          |   |         |          |         |   |         |         |         |   |         |         |          |   |         |          |          |   |         |         |          |   |         |         |         |   |          |          |         |   |         |         |          |   |          |         |          |   |          |         |          |   |          |          |          |   |          |         |          |   |          |         |         |   |          |         |          |   |          |         |         |   |          |         |         |   |         |          |          |   |         |         |         |   |         |          |         |   |         |         |          |   |          |          |          |   |          |          |         |   |          |         |         |   |          |         |         |
| C                                              | -1.34035                                                                                                                                                                                                                                                                                                                                                                                                                                                                                                                                                                                                                                                                                                                                                                                                                                                                                                                                                                                                                                                                                                                                                                                                                                                                                                                                                                                                                                                                                                                                                                                                                                                                                                                                                                                                                                                                                                                                                                                       | 1.86448  | -0.59156 |          |          |   |         |          |          |   |         |          |         |   |         |         |         |   |         |         |          |   |         |          |          |   |         |         |          |   |         |         |         |   |          |          |         |   |         |         |          |   |          |         |          |   |          |         |          |   |          |          |          |   |          |         |          |   |          |         |         |   |          |         |          |   |          |         |         |   |          |         |         |   |         |          |          |   |         |         |         |   |         |          |         |   |         |         |          |   |          |          |          |   |          |          |         |   |          |         |         |   |          |         |         |
| O                                              | -1.21433                                                                                                                                                                                                                                                                                                                                                                                                                                                                                                                                                                                                                                                                                                                                                                                                                                                                                                                                                                                                                                                                                                                                                                                                                                                                                                                                                                                                                                                                                                                                                                                                                                                                                                                                                                                                                                                                                                                                                                                       | -0.42655 | -1.31613 |          |          |   |         |          |          |   |         |          |         |   |         |         |         |   |         |         |          |   |         |          |          |   |         |         |          |   |         |         |         |   |          |          |         |   |         |         |          |   |          |         |          |   |          |         |          |   |          |          |          |   |          |         |          |   |          |         |         |   |          |         |          |   |          |         |         |   |          |         |         |   |         |          |          |   |         |         |         |   |         |          |         |   |         |         |          |   |          |          |          |   |          |          |         |   |          |         |         |   |          |         |         |
| C                                              | -2.51676                                                                                                                                                                                                                                                                                                                                                                                                                                                                                                                                                                                                                                                                                                                                                                                                                                                                                                                                                                                                                                                                                                                                                                                                                                                                                                                                                                                                                                                                                                                                                                                                                                                                                                                                                                                                                                                                                                                                                                                       | 2.11405  | -1.31759 |          |          |   |         |          |          |   |         |          |         |   |         |         |         |   |         |         |          |   |         |          |          |   |         |         |          |   |         |         |         |   |          |          |         |   |         |         |          |   |          |         |          |   |          |         |          |   |          |          |          |   |          |         |          |   |          |         |         |   |          |         |          |   |          |         |         |   |          |         |         |   |         |          |          |   |         |         |         |   |         |          |         |   |         |         |          |   |          |          |          |   |          |          |         |   |          |         |         |   |          |         |         |
| C                                              | -1.03850                                                                                                                                                                                                                                                                                                                                                                                                                                                                                                                                                                                                                                                                                                                                                                                                                                                                                                                                                                                                                                                                                                                                                                                                                                                                                                                                                                                                                                                                                                                                                                                                                                                                                                                                                                                                                                                                                                                                                                                       | 2.70587  | 0.48474  |          |          |   |         |          |          |   |         |          |         |   |         |         |         |   |         |         |          |   |         |          |          |   |         |         |          |   |         |         |         |   |          |          |         |   |         |         |          |   |          |         |          |   |          |         |          |   |          |          |          |   |          |         |          |   |          |         |         |   |          |         |          |   |          |         |         |   |          |         |         |   |         |          |          |   |         |         |         |   |         |          |         |   |         |         |          |   |          |          |          |   |          |          |         |   |          |         |         |   |          |         |         |
| C                                              | -3.37090                                                                                                                                                                                                                                                                                                                                                                                                                                                                                                                                                                                                                                                                                                                                                                                                                                                                                                                                                                                                                                                                                                                                                                                                                                                                                                                                                                                                                                                                                                                                                                                                                                                                                                                                                                                                                                                                                                                                                                                       | 3.15850  | -0.96783 |          |          |   |         |          |          |   |         |          |         |   |         |         |         |   |         |         |          |   |         |          |          |   |         |         |          |   |         |         |         |   |          |          |         |   |         |         |          |   |          |         |          |   |          |         |          |   |          |          |          |   |          |         |          |   |          |         |         |   |          |         |          |   |          |         |         |   |          |         |         |   |         |          |          |   |         |         |         |   |         |          |         |   |         |         |          |   |          |          |          |   |          |          |         |   |          |         |         |   |          |         |         |
| C                                              | -1.88987                                                                                                                                                                                                                                                                                                                                                                                                                                                                                                                                                                                                                                                                                                                                                                                                                                                                                                                                                                                                                                                                                                                                                                                                                                                                                                                                                                                                                                                                                                                                                                                                                                                                                                                                                                                                                                                                                                                                                                                       | 3.75772  | 0.83689  |          |          |   |         |          |          |   |         |          |         |   |         |         |         |   |         |         |          |   |         |          |          |   |         |         |          |   |         |         |         |   |          |          |         |   |         |         |          |   |          |         |          |   |          |         |          |   |          |          |          |   |          |         |          |   |          |         |         |   |          |         |          |   |          |         |         |   |          |         |         |   |         |          |          |   |         |         |         |   |         |          |         |   |         |         |          |   |          |          |          |   |          |          |         |   |          |         |         |   |          |         |         |
| C                                              | -3.06067                                                                                                                                                                                                                                                                                                                                                                                                                                                                                                                                                                                                                                                                                                                                                                                                                                                                                                                                                                                                                                                                                                                                                                                                                                                                                                                                                                                                                                                                                                                                                                                                                                                                                                                                                                                                                                                                                                                                                                                       | 3.98630  | 0.11505  |          |          |   |         |          |          |   |         |          |         |   |         |         |         |   |         |         |          |   |         |          |          |   |         |         |          |   |         |         |         |   |          |          |         |   |         |         |          |   |          |         |          |   |          |         |          |   |          |          |          |   |          |         |          |   |          |         |         |   |          |         |          |   |          |         |         |   |          |         |         |   |         |          |          |   |         |         |         |   |         |          |         |   |         |         |          |   |          |          |          |   |          |          |         |   |          |         |         |   |          |         |         |
| H                                              | 1.03652                                                                                                                                                                                                                                                                                                                                                                                                                                                                                                                                                                                                                                                                                                                                                                                                                                                                                                                                                                                                                                                                                                                                                                                                                                                                                                                                                                                                                                                                                                                                                                                                                                                                                                                                                                                                                                                                                                                                                                                        | -0.82049 | -0.78470 |          |          |   |         |          |          |   |         |          |         |   |         |         |         |   |         |         |          |   |         |          |          |   |         |         |          |   |         |         |         |   |          |          |         |   |         |         |          |   |          |         |          |   |          |         |          |   |          |          |          |   |          |         |          |   |          |         |         |   |          |         |          |   |          |         |         |   |          |         |         |   |         |          |          |   |         |         |         |   |         |          |         |   |         |         |          |   |          |          |          |   |          |          |         |   |          |         |         |   |          |         |         |
| O                                              | 1.53995                                                                                                                                                                                                                                                                                                                                                                                                                                                                                                                                                                                                                                                                                                                                                                                                                                                                                                                                                                                                                                                                                                                                                                                                                                                                                                                                                                                                                                                                                                                                                                                                                                                                                                                                                                                                                                                                                                                                                                                        | 0.33448  | 2.06042  |          |          |   |         |          |          |   |         |          |         |   |         |         |         |   |         |         |          |   |         |          |          |   |         |         |          |   |         |         |         |   |          |          |         |   |         |         |          |   |          |         |          |   |          |         |          |   |          |          |          |   |          |         |          |   |          |         |         |   |          |         |          |   |          |         |         |   |          |         |         |   |         |          |          |   |         |         |         |   |         |          |         |   |         |         |          |   |          |          |          |   |          |          |         |   |          |         |         |   |          |         |         |
| C                                              | 1.33843                                                                                                                                                                                                                                                                                                                                                                                                                                                                                                                                                                                                                                                                                                                                                                                                                                                                                                                                                                                                                                                                                                                                                                                                                                                                                                                                                                                                                                                                                                                                                                                                                                                                                                                                                                                                                                                                                                                                                                                        | -0.06347 | 3.42559  |          |          |   |         |          |          |   |         |          |         |   |         |         |         |   |         |         |          |   |         |          |          |   |         |         |          |   |         |         |         |   |          |          |         |   |         |         |          |   |          |         |          |   |          |         |          |   |          |          |          |   |          |         |          |   |          |         |         |   |          |         |          |   |          |         |         |   |          |         |         |   |         |          |          |   |         |         |         |   |         |          |         |   |         |         |          |   |          |          |          |   |          |          |         |   |          |         |         |   |          |         |         |
| C                                              | 2.19888                                                                                                                                                                                                                                                                                                                                                                                                                                                                                                                                                                                                                                                                                                                                                                                                                                                                                                                                                                                                                                                                                                                                                                                                                                                                                                                                                                                                                                                                                                                                                                                                                                                                                                                                                                                                                                                                                                                                                                                        | 1.96366  | -1.75781 |          |          |   |         |          |          |   |         |          |         |   |         |         |         |   |         |         |          |   |         |          |          |   |         |         |          |   |         |         |         |   |          |          |         |   |         |         |          |   |          |         |          |   |          |         |          |   |          |          |          |   |          |         |          |   |          |         |         |   |          |         |          |   |          |         |         |   |          |         |         |   |         |          |          |   |         |         |         |   |         |          |         |   |         |         |          |   |          |          |          |   |          |          |         |   |          |         |         |   |          |         |         |
| N                                              | -3.78994                                                                                                                                                                                                                                                                                                                                                                                                                                                                                                                                                                                                                                                                                                                                                                                                                                                                                                                                                                                                                                                                                                                                                                                                                                                                                                                                                                                                                                                                                                                                                                                                                                                                                                                                                                                                                                                                                                                                                                                       | -1.32637 | -0.86842 |          |          |   |         |          |          |   |         |          |         |   |         |         |         |   |         |         |          |   |         |          |          |   |         |         |          |   |         |         |         |   |          |          |         |   |         |         |          |   |          |         |          |   |          |         |          |   |          |          |          |   |          |         |          |   |          |         |         |   |          |         |          |   |          |         |         |   |          |         |         |   |         |          |          |   |         |         |         |   |         |          |         |   |         |         |          |   |          |          |          |   |          |          |         |   |          |         |         |   |          |         |         |
| N                                              | -2.86842                                                                                                                                                                                                                                                                                                                                                                                                                                                                                                                                                                                                                                                                                                                                                                                                                                                                                                                                                                                                                                                                                                                                                                                                                                                                                                                                                                                                                                                                                                                                                                                                                                                                                                                                                                                                                                                                                                                                                                                       | -1.87116 | 1.17569  |          |          |   |         |          |          |   |         |          |         |   |         |         |         |   |         |         |          |   |         |          |          |   |         |         |          |   |         |         |         |   |          |          |         |   |         |         |          |   |          |         |          |   |          |         |          |   |          |          |          |   |          |         |          |   |          |         |         |   |          |         |          |   |          |         |         |   |          |         |         |   |         |          |          |   |         |         |         |   |         |          |         |   |         |         |          |   |          |          |          |   |          |          |         |   |          |         |         |   |          |         |         |
| H                                              | -1.63514                                                                                                                                                                                                                                                                                                                                                                                                                                                                                                                                                                                                                                                                                                                                                                                                                                                                                                                                                                                                                                                                                                                                                                                                                                                                                                                                                                                                                                                                                                                                                                                                                                                                                                                                                                                                                                                                                                                                                                                       | 4.39545  | 1.67932  |          |          |   |         |          |          |   |         |          |         |   |         |         |         |   |         |         |          |   |         |          |          |   |         |         |          |   |         |         |         |   |          |          |         |   |         |         |          |   |          |         |          |   |          |         |          |   |          |          |          |   |          |         |          |   |          |         |         |   |          |         |          |   |          |         |         |   |          |         |         |   |         |          |          |   |         |         |         |   |         |          |         |   |         |         |          |   |          |          |          |   |          |          |         |   |          |         |         |   |          |         |         |
| H                                              | -3.72343                                                                                                                                                                                                                                                                                                                                                                                                                                                                                                                                                                                                                                                                                                                                                                                                                                                                                                                                                                                                                                                                                                                                                                                                                                                                                                                                                                                                                                                                                                                                                                                                                                                                                                                                                                                                                                                                                                                                                                                       | 4.80277  | 0.38863  |          |          |   |         |          |          |   |         |          |         |   |         |         |         |   |         |         |          |   |         |          |          |   |         |         |          |   |         |         |         |   |          |          |         |   |         |         |          |   |          |         |          |   |          |         |          |   |          |          |          |   |          |         |          |   |          |         |         |   |          |         |          |   |          |         |         |   |          |         |         |   |         |          |          |   |         |         |         |   |         |          |         |   |         |         |          |   |          |          |          |   |          |          |         |   |          |         |         |   |          |         |         |

|   |          |          |          |
|---|----------|----------|----------|
| H | -4.27620 | 3.33124  | -1.54415 |
| H | -2.75783 | 1.48247  | -2.16791 |
| H | -0.13398 | 2.54609  | 1.06331  |
| H | 1.40515  | 2.70440  | -1.88516 |
| H | 2.14934  | 1.25130  | -2.58712 |
| H | 3.15817  | 2.48763  | -1.81212 |
| H | -0.02247 | 1.06410  | -2.03710 |
| H | 2.13675  | 2.04185  | 0.38040  |
| H | 2.97728  | -1.20514 | -1.49599 |
| H | 6.74092  | -1.88711 | -1.21035 |
| H | 6.03749  | -2.81971 | 0.12342  |
| H | 5.28353  | -2.85741 | -1.47956 |
| H | 4.33460  | 1.69360  | 1.26246  |
| H | -2.89050 | -0.89067 | -1.12506 |
| H | -2.04258 | -1.28617 | 0.99650  |
| H | 2.24796  | 0.22771  | 3.95260  |
| H | 0.47195  | 0.44530  | 3.85503  |
| H | 1.18910  | -1.14422 | 3.49598  |
| O | 0.96665  | -1.84293 | -1.54599 |
| H | -0.55217 | -1.13348 | -1.58476 |
| C | 0.94741  | -3.01351 | -0.76458 |
| H | 1.88495  | -3.15242 | -0.19553 |
| H | 0.82737  | -3.90079 | -1.40595 |
| H | 0.12084  | -3.02384 | -0.03259 |
| H | -3.00944 | -2.13980 | 2.13915  |
| H | -4.48162 | -1.48202 | -1.58555 |
| C | -3.89942 | -1.91633 | 0.32257  |
| N | -5.03019 | -2.55528 | 0.67000  |
| H | -5.03925 | -3.03582 | 1.55770  |
| C | -6.19849 | -2.69292 | -0.19135 |
| H | -6.97860 | -3.19794 | 0.37840  |
| H | -5.97899 | -3.29398 | -1.08166 |
| H | -6.57789 | -1.71213 | -0.49678 |
| H | 6.17270  | -0.04749 | 1.01482  |

Optimized Molecular Properties for TArgHis-TS3-2

|                                                |                                                                                                                                                                                                                                                                                                                                                                                                                                                                                                                                                                                                                                                                                                                                                                                                                                                                                                                                                                                                                                                                                                                                                                                                                                                                                                                                                                                                                                                                                                                                                                                                                                                                                                                                                                                                                                                                                                                                                                                                |          |          |          |          |   |         |          |          |   |         |         |          |   |         |         |          |   |         |         |          |   |         |          |          |   |         |         |          |   |         |         |         |   |          |          |         |   |         |         |          |   |          |         |          |   |          |         |          |   |          |          |         |   |          |         |         |   |          |         |          |   |          |         |         |   |          |         |          |   |          |         |          |   |         |          |          |   |         |         |         |   |         |         |         |   |         |         |          |   |         |          |          |   |          |          |         |   |          |         |          |   |          |         |          |
|------------------------------------------------|------------------------------------------------------------------------------------------------------------------------------------------------------------------------------------------------------------------------------------------------------------------------------------------------------------------------------------------------------------------------------------------------------------------------------------------------------------------------------------------------------------------------------------------------------------------------------------------------------------------------------------------------------------------------------------------------------------------------------------------------------------------------------------------------------------------------------------------------------------------------------------------------------------------------------------------------------------------------------------------------------------------------------------------------------------------------------------------------------------------------------------------------------------------------------------------------------------------------------------------------------------------------------------------------------------------------------------------------------------------------------------------------------------------------------------------------------------------------------------------------------------------------------------------------------------------------------------------------------------------------------------------------------------------------------------------------------------------------------------------------------------------------------------------------------------------------------------------------------------------------------------------------------------------------------------------------------------------------------------------------|----------|----------|----------|----------|---|---------|----------|----------|---|---------|---------|----------|---|---------|---------|----------|---|---------|---------|----------|---|---------|----------|----------|---|---------|---------|----------|---|---------|---------|---------|---|----------|----------|---------|---|---------|---------|----------|---|----------|---------|----------|---|----------|---------|----------|---|----------|----------|---------|---|----------|---------|---------|---|----------|---------|----------|---|----------|---------|---------|---|----------|---------|----------|---|----------|---------|----------|---|---------|----------|----------|---|---------|---------|---------|---|---------|---------|---------|---|---------|---------|----------|---|---------|----------|----------|---|----------|----------|---------|---|----------|---------|----------|---|----------|---------|----------|
| Number of<br>(-)<br>Vibrational<br>Frequencies | 1 (-1099.3385)                                                                                                                                                                                                                                                                                                                                                                                                                                                                                                                                                                                                                                                                                                                                                                                                                                                                                                                                                                                                                                                                                                                                                                                                                                                                                                                                                                                                                                                                                                                                                                                                                                                                                                                                                                                                                                                                                                                                                                                 |          |          |          |          |   |         |          |          |   |         |         |          |   |         |         |          |   |         |         |          |   |         |          |          |   |         |         |          |   |         |         |         |   |          |          |         |   |         |         |          |   |          |         |          |   |          |         |          |   |          |          |         |   |          |         |         |   |          |         |          |   |          |         |         |   |          |         |          |   |          |         |          |   |         |          |          |   |         |         |         |   |         |         |         |   |         |         |          |   |         |          |          |   |          |          |         |   |          |         |          |   |          |         |          |
| Absolute<br>Energies<br>(Hartrees)             | <p><b>B3LYP/6-31G(d) (PCM)</b></p> <p>There are 13 positive frequencies below 100 cm<sup>-1</sup>.</p> <p>Zero-point correction: 0.512228 hartree<br/>         Enthalpy correction: 0.544985 hartree<br/>         Free Energy correction: 0.450025 hartree<br/>         Quasiharmonic Free Energy correction: 0.457771 hartree</p> <p>SCF Energy: -1317.772984 hartree<br/>         SCF Energy + ZPVE: -1317.260756 hartree<br/>         Enthalpy: -1317.227999 hartree<br/>         Free Energy: -1317.322959 hartree</p> <p>Free Energy with quasiharmonic correction: -1317.315213 hartree<br/>         (correction: 4.86 kcal/mol)</p> <p><b>B3LYP-D3/6-311+G(d,p) (PCM)</b></p> <p>SCF Done: E(RB3LYP) = -1318.24029925 A.U.</p>                                                                                                                                                                                                                                                                                                                                                                                                                                                                                                                                                                                                                                                                                                                                                                                                                                                                                                                                                                                                                                                                                                                                                                                                                                                          |          |          |          |          |   |         |          |          |   |         |         |          |   |         |         |          |   |         |         |          |   |         |          |          |   |         |         |          |   |         |         |         |   |          |          |         |   |         |         |          |   |          |         |          |   |          |         |          |   |          |          |         |   |          |         |         |   |          |         |          |   |          |         |         |   |          |         |          |   |          |         |          |   |         |          |          |   |         |         |         |   |         |         |         |   |         |         |          |   |         |          |          |   |          |          |         |   |          |         |          |   |          |         |          |
| Cartesian<br>Coordinates                       | <p>(PCM)</p> <p>60</p> <p>spD3-TS3-arg-TArgHis.out Energy: -827208.2701968</p> <table> <tbody> <tr><td>C</td><td>4.47011</td><td>-0.80100</td><td>-0.31851</td></tr> <tr><td>C</td><td>3.11833</td><td>-0.78485</td><td>-0.52737</td></tr> <tr><td>N</td><td>4.84811</td><td>0.53158</td><td>-0.25912</td></tr> <tr><td>C</td><td>3.77461</td><td>1.31639</td><td>-0.41995</td></tr> <tr><td>N</td><td>2.70910</td><td>0.53805</td><td>-0.58710</td></tr> <tr><td>C</td><td>5.43474</td><td>-1.92772</td><td>-0.16328</td></tr> <tr><td>C</td><td>1.32548</td><td>1.06561</td><td>-0.83632</td></tr> <tr><td>C</td><td>0.45818</td><td>0.32453</td><td>1.43602</td></tr> <tr><td>O</td><td>-0.36226</td><td>-0.13822</td><td>2.26025</td></tr> <tr><td>C</td><td>0.27247</td><td>0.32256</td><td>-0.00335</td></tr> <tr><td>C</td><td>-1.18702</td><td>0.62131</td><td>-0.46042</td></tr> <tr><td>C</td><td>-1.58177</td><td>2.10160</td><td>-0.46193</td></tr> <tr><td>O</td><td>-2.14761</td><td>-0.12631</td><td>0.30657</td></tr> <tr><td>C</td><td>-1.39709</td><td>2.92271</td><td>0.66095</td></tr> <tr><td>C</td><td>-2.19205</td><td>2.65398</td><td>-1.59573</td></tr> <tr><td>C</td><td>-1.80709</td><td>4.25604</td><td>0.64554</td></tr> <tr><td>C</td><td>-2.60047</td><td>3.99001</td><td>-1.61780</td></tr> <tr><td>C</td><td>-2.40766</td><td>4.79594</td><td>-0.49545</td></tr> <tr><td>H</td><td>0.29891</td><td>-1.17678</td><td>-0.32571</td></tr> <tr><td>O</td><td>1.65060</td><td>0.79353</td><td>1.87969</td></tr> <tr><td>C</td><td>1.90663</td><td>0.65811</td><td>3.29033</td></tr> <tr><td>C</td><td>1.08879</td><td>1.02092</td><td>-2.35487</td></tr> <tr><td>N</td><td>0.17423</td><td>-2.34504</td><td>-0.66378</td></tr> <tr><td>N</td><td>-1.11946</td><td>-2.89503</td><td>1.19260</td></tr> <tr><td>H</td><td>-3.07072</td><td>4.39694</td><td>-2.50901</td></tr> <tr><td>H</td><td>-2.72383</td><td>5.83537</td><td>-0.50654</td></tr> </tbody> </table> | C        | 4.47011  | -0.80100 | -0.31851 | C | 3.11833 | -0.78485 | -0.52737 | N | 4.84811 | 0.53158 | -0.25912 | C | 3.77461 | 1.31639 | -0.41995 | N | 2.70910 | 0.53805 | -0.58710 | C | 5.43474 | -1.92772 | -0.16328 | C | 1.32548 | 1.06561 | -0.83632 | C | 0.45818 | 0.32453 | 1.43602 | O | -0.36226 | -0.13822 | 2.26025 | C | 0.27247 | 0.32256 | -0.00335 | C | -1.18702 | 0.62131 | -0.46042 | C | -1.58177 | 2.10160 | -0.46193 | O | -2.14761 | -0.12631 | 0.30657 | C | -1.39709 | 2.92271 | 0.66095 | C | -2.19205 | 2.65398 | -1.59573 | C | -1.80709 | 4.25604 | 0.64554 | C | -2.60047 | 3.99001 | -1.61780 | C | -2.40766 | 4.79594 | -0.49545 | H | 0.29891 | -1.17678 | -0.32571 | O | 1.65060 | 0.79353 | 1.87969 | C | 1.90663 | 0.65811 | 3.29033 | C | 1.08879 | 1.02092 | -2.35487 | N | 0.17423 | -2.34504 | -0.66378 | N | -1.11946 | -2.89503 | 1.19260 | H | -3.07072 | 4.39694 | -2.50901 | H | -2.72383 | 5.83537 | -0.50654 |
| C                                              | 4.47011                                                                                                                                                                                                                                                                                                                                                                                                                                                                                                                                                                                                                                                                                                                                                                                                                                                                                                                                                                                                                                                                                                                                                                                                                                                                                                                                                                                                                                                                                                                                                                                                                                                                                                                                                                                                                                                                                                                                                                                        | -0.80100 | -0.31851 |          |          |   |         |          |          |   |         |         |          |   |         |         |          |   |         |         |          |   |         |          |          |   |         |         |          |   |         |         |         |   |          |          |         |   |         |         |          |   |          |         |          |   |          |         |          |   |          |          |         |   |          |         |         |   |          |         |          |   |          |         |         |   |          |         |          |   |          |         |          |   |         |          |          |   |         |         |         |   |         |         |         |   |         |         |          |   |         |          |          |   |          |          |         |   |          |         |          |   |          |         |          |
| C                                              | 3.11833                                                                                                                                                                                                                                                                                                                                                                                                                                                                                                                                                                                                                                                                                                                                                                                                                                                                                                                                                                                                                                                                                                                                                                                                                                                                                                                                                                                                                                                                                                                                                                                                                                                                                                                                                                                                                                                                                                                                                                                        | -0.78485 | -0.52737 |          |          |   |         |          |          |   |         |         |          |   |         |         |          |   |         |         |          |   |         |          |          |   |         |         |          |   |         |         |         |   |          |          |         |   |         |         |          |   |          |         |          |   |          |         |          |   |          |          |         |   |          |         |         |   |          |         |          |   |          |         |         |   |          |         |          |   |          |         |          |   |         |          |          |   |         |         |         |   |         |         |         |   |         |         |          |   |         |          |          |   |          |          |         |   |          |         |          |   |          |         |          |
| N                                              | 4.84811                                                                                                                                                                                                                                                                                                                                                                                                                                                                                                                                                                                                                                                                                                                                                                                                                                                                                                                                                                                                                                                                                                                                                                                                                                                                                                                                                                                                                                                                                                                                                                                                                                                                                                                                                                                                                                                                                                                                                                                        | 0.53158  | -0.25912 |          |          |   |         |          |          |   |         |         |          |   |         |         |          |   |         |         |          |   |         |          |          |   |         |         |          |   |         |         |         |   |          |          |         |   |         |         |          |   |          |         |          |   |          |         |          |   |          |          |         |   |          |         |         |   |          |         |          |   |          |         |         |   |          |         |          |   |          |         |          |   |         |          |          |   |         |         |         |   |         |         |         |   |         |         |          |   |         |          |          |   |          |          |         |   |          |         |          |   |          |         |          |
| C                                              | 3.77461                                                                                                                                                                                                                                                                                                                                                                                                                                                                                                                                                                                                                                                                                                                                                                                                                                                                                                                                                                                                                                                                                                                                                                                                                                                                                                                                                                                                                                                                                                                                                                                                                                                                                                                                                                                                                                                                                                                                                                                        | 1.31639  | -0.41995 |          |          |   |         |          |          |   |         |         |          |   |         |         |          |   |         |         |          |   |         |          |          |   |         |         |          |   |         |         |         |   |          |          |         |   |         |         |          |   |          |         |          |   |          |         |          |   |          |          |         |   |          |         |         |   |          |         |          |   |          |         |         |   |          |         |          |   |          |         |          |   |         |          |          |   |         |         |         |   |         |         |         |   |         |         |          |   |         |          |          |   |          |          |         |   |          |         |          |   |          |         |          |
| N                                              | 2.70910                                                                                                                                                                                                                                                                                                                                                                                                                                                                                                                                                                                                                                                                                                                                                                                                                                                                                                                                                                                                                                                                                                                                                                                                                                                                                                                                                                                                                                                                                                                                                                                                                                                                                                                                                                                                                                                                                                                                                                                        | 0.53805  | -0.58710 |          |          |   |         |          |          |   |         |         |          |   |         |         |          |   |         |         |          |   |         |          |          |   |         |         |          |   |         |         |         |   |          |          |         |   |         |         |          |   |          |         |          |   |          |         |          |   |          |          |         |   |          |         |         |   |          |         |          |   |          |         |         |   |          |         |          |   |          |         |          |   |         |          |          |   |         |         |         |   |         |         |         |   |         |         |          |   |         |          |          |   |          |          |         |   |          |         |          |   |          |         |          |
| C                                              | 5.43474                                                                                                                                                                                                                                                                                                                                                                                                                                                                                                                                                                                                                                                                                                                                                                                                                                                                                                                                                                                                                                                                                                                                                                                                                                                                                                                                                                                                                                                                                                                                                                                                                                                                                                                                                                                                                                                                                                                                                                                        | -1.92772 | -0.16328 |          |          |   |         |          |          |   |         |         |          |   |         |         |          |   |         |         |          |   |         |          |          |   |         |         |          |   |         |         |         |   |          |          |         |   |         |         |          |   |          |         |          |   |          |         |          |   |          |          |         |   |          |         |         |   |          |         |          |   |          |         |         |   |          |         |          |   |          |         |          |   |         |          |          |   |         |         |         |   |         |         |         |   |         |         |          |   |         |          |          |   |          |          |         |   |          |         |          |   |          |         |          |
| C                                              | 1.32548                                                                                                                                                                                                                                                                                                                                                                                                                                                                                                                                                                                                                                                                                                                                                                                                                                                                                                                                                                                                                                                                                                                                                                                                                                                                                                                                                                                                                                                                                                                                                                                                                                                                                                                                                                                                                                                                                                                                                                                        | 1.06561  | -0.83632 |          |          |   |         |          |          |   |         |         |          |   |         |         |          |   |         |         |          |   |         |          |          |   |         |         |          |   |         |         |         |   |          |          |         |   |         |         |          |   |          |         |          |   |          |         |          |   |          |          |         |   |          |         |         |   |          |         |          |   |          |         |         |   |          |         |          |   |          |         |          |   |         |          |          |   |         |         |         |   |         |         |         |   |         |         |          |   |         |          |          |   |          |          |         |   |          |         |          |   |          |         |          |
| C                                              | 0.45818                                                                                                                                                                                                                                                                                                                                                                                                                                                                                                                                                                                                                                                                                                                                                                                                                                                                                                                                                                                                                                                                                                                                                                                                                                                                                                                                                                                                                                                                                                                                                                                                                                                                                                                                                                                                                                                                                                                                                                                        | 0.32453  | 1.43602  |          |          |   |         |          |          |   |         |         |          |   |         |         |          |   |         |         |          |   |         |          |          |   |         |         |          |   |         |         |         |   |          |          |         |   |         |         |          |   |          |         |          |   |          |         |          |   |          |          |         |   |          |         |         |   |          |         |          |   |          |         |         |   |          |         |          |   |          |         |          |   |         |          |          |   |         |         |         |   |         |         |         |   |         |         |          |   |         |          |          |   |          |          |         |   |          |         |          |   |          |         |          |
| O                                              | -0.36226                                                                                                                                                                                                                                                                                                                                                                                                                                                                                                                                                                                                                                                                                                                                                                                                                                                                                                                                                                                                                                                                                                                                                                                                                                                                                                                                                                                                                                                                                                                                                                                                                                                                                                                                                                                                                                                                                                                                                                                       | -0.13822 | 2.26025  |          |          |   |         |          |          |   |         |         |          |   |         |         |          |   |         |         |          |   |         |          |          |   |         |         |          |   |         |         |         |   |          |          |         |   |         |         |          |   |          |         |          |   |          |         |          |   |          |          |         |   |          |         |         |   |          |         |          |   |          |         |         |   |          |         |          |   |          |         |          |   |         |          |          |   |         |         |         |   |         |         |         |   |         |         |          |   |         |          |          |   |          |          |         |   |          |         |          |   |          |         |          |
| C                                              | 0.27247                                                                                                                                                                                                                                                                                                                                                                                                                                                                                                                                                                                                                                                                                                                                                                                                                                                                                                                                                                                                                                                                                                                                                                                                                                                                                                                                                                                                                                                                                                                                                                                                                                                                                                                                                                                                                                                                                                                                                                                        | 0.32256  | -0.00335 |          |          |   |         |          |          |   |         |         |          |   |         |         |          |   |         |         |          |   |         |          |          |   |         |         |          |   |         |         |         |   |          |          |         |   |         |         |          |   |          |         |          |   |          |         |          |   |          |          |         |   |          |         |         |   |          |         |          |   |          |         |         |   |          |         |          |   |          |         |          |   |         |          |          |   |         |         |         |   |         |         |         |   |         |         |          |   |         |          |          |   |          |          |         |   |          |         |          |   |          |         |          |
| C                                              | -1.18702                                                                                                                                                                                                                                                                                                                                                                                                                                                                                                                                                                                                                                                                                                                                                                                                                                                                                                                                                                                                                                                                                                                                                                                                                                                                                                                                                                                                                                                                                                                                                                                                                                                                                                                                                                                                                                                                                                                                                                                       | 0.62131  | -0.46042 |          |          |   |         |          |          |   |         |         |          |   |         |         |          |   |         |         |          |   |         |          |          |   |         |         |          |   |         |         |         |   |          |          |         |   |         |         |          |   |          |         |          |   |          |         |          |   |          |          |         |   |          |         |         |   |          |         |          |   |          |         |         |   |          |         |          |   |          |         |          |   |         |          |          |   |         |         |         |   |         |         |         |   |         |         |          |   |         |          |          |   |          |          |         |   |          |         |          |   |          |         |          |
| C                                              | -1.58177                                                                                                                                                                                                                                                                                                                                                                                                                                                                                                                                                                                                                                                                                                                                                                                                                                                                                                                                                                                                                                                                                                                                                                                                                                                                                                                                                                                                                                                                                                                                                                                                                                                                                                                                                                                                                                                                                                                                                                                       | 2.10160  | -0.46193 |          |          |   |         |          |          |   |         |         |          |   |         |         |          |   |         |         |          |   |         |          |          |   |         |         |          |   |         |         |         |   |          |          |         |   |         |         |          |   |          |         |          |   |          |         |          |   |          |          |         |   |          |         |         |   |          |         |          |   |          |         |         |   |          |         |          |   |          |         |          |   |         |          |          |   |         |         |         |   |         |         |         |   |         |         |          |   |         |          |          |   |          |          |         |   |          |         |          |   |          |         |          |
| O                                              | -2.14761                                                                                                                                                                                                                                                                                                                                                                                                                                                                                                                                                                                                                                                                                                                                                                                                                                                                                                                                                                                                                                                                                                                                                                                                                                                                                                                                                                                                                                                                                                                                                                                                                                                                                                                                                                                                                                                                                                                                                                                       | -0.12631 | 0.30657  |          |          |   |         |          |          |   |         |         |          |   |         |         |          |   |         |         |          |   |         |          |          |   |         |         |          |   |         |         |         |   |          |          |         |   |         |         |          |   |          |         |          |   |          |         |          |   |          |          |         |   |          |         |         |   |          |         |          |   |          |         |         |   |          |         |          |   |          |         |          |   |         |          |          |   |         |         |         |   |         |         |         |   |         |         |          |   |         |          |          |   |          |          |         |   |          |         |          |   |          |         |          |
| C                                              | -1.39709                                                                                                                                                                                                                                                                                                                                                                                                                                                                                                                                                                                                                                                                                                                                                                                                                                                                                                                                                                                                                                                                                                                                                                                                                                                                                                                                                                                                                                                                                                                                                                                                                                                                                                                                                                                                                                                                                                                                                                                       | 2.92271  | 0.66095  |          |          |   |         |          |          |   |         |         |          |   |         |         |          |   |         |         |          |   |         |          |          |   |         |         |          |   |         |         |         |   |          |          |         |   |         |         |          |   |          |         |          |   |          |         |          |   |          |          |         |   |          |         |         |   |          |         |          |   |          |         |         |   |          |         |          |   |          |         |          |   |         |          |          |   |         |         |         |   |         |         |         |   |         |         |          |   |         |          |          |   |          |          |         |   |          |         |          |   |          |         |          |
| C                                              | -2.19205                                                                                                                                                                                                                                                                                                                                                                                                                                                                                                                                                                                                                                                                                                                                                                                                                                                                                                                                                                                                                                                                                                                                                                                                                                                                                                                                                                                                                                                                                                                                                                                                                                                                                                                                                                                                                                                                                                                                                                                       | 2.65398  | -1.59573 |          |          |   |         |          |          |   |         |         |          |   |         |         |          |   |         |         |          |   |         |          |          |   |         |         |          |   |         |         |         |   |          |          |         |   |         |         |          |   |          |         |          |   |          |         |          |   |          |          |         |   |          |         |         |   |          |         |          |   |          |         |         |   |          |         |          |   |          |         |          |   |         |          |          |   |         |         |         |   |         |         |         |   |         |         |          |   |         |          |          |   |          |          |         |   |          |         |          |   |          |         |          |
| C                                              | -1.80709                                                                                                                                                                                                                                                                                                                                                                                                                                                                                                                                                                                                                                                                                                                                                                                                                                                                                                                                                                                                                                                                                                                                                                                                                                                                                                                                                                                                                                                                                                                                                                                                                                                                                                                                                                                                                                                                                                                                                                                       | 4.25604  | 0.64554  |          |          |   |         |          |          |   |         |         |          |   |         |         |          |   |         |         |          |   |         |          |          |   |         |         |          |   |         |         |         |   |          |          |         |   |         |         |          |   |          |         |          |   |          |         |          |   |          |          |         |   |          |         |         |   |          |         |          |   |          |         |         |   |          |         |          |   |          |         |          |   |         |          |          |   |         |         |         |   |         |         |         |   |         |         |          |   |         |          |          |   |          |          |         |   |          |         |          |   |          |         |          |
| C                                              | -2.60047                                                                                                                                                                                                                                                                                                                                                                                                                                                                                                                                                                                                                                                                                                                                                                                                                                                                                                                                                                                                                                                                                                                                                                                                                                                                                                                                                                                                                                                                                                                                                                                                                                                                                                                                                                                                                                                                                                                                                                                       | 3.99001  | -1.61780 |          |          |   |         |          |          |   |         |         |          |   |         |         |          |   |         |         |          |   |         |          |          |   |         |         |          |   |         |         |         |   |          |          |         |   |         |         |          |   |          |         |          |   |          |         |          |   |          |          |         |   |          |         |         |   |          |         |          |   |          |         |         |   |          |         |          |   |          |         |          |   |         |          |          |   |         |         |         |   |         |         |         |   |         |         |          |   |         |          |          |   |          |          |         |   |          |         |          |   |          |         |          |
| C                                              | -2.40766                                                                                                                                                                                                                                                                                                                                                                                                                                                                                                                                                                                                                                                                                                                                                                                                                                                                                                                                                                                                                                                                                                                                                                                                                                                                                                                                                                                                                                                                                                                                                                                                                                                                                                                                                                                                                                                                                                                                                                                       | 4.79594  | -0.49545 |          |          |   |         |          |          |   |         |         |          |   |         |         |          |   |         |         |          |   |         |          |          |   |         |         |          |   |         |         |         |   |          |          |         |   |         |         |          |   |          |         |          |   |          |         |          |   |          |          |         |   |          |         |         |   |          |         |          |   |          |         |         |   |          |         |          |   |          |         |          |   |         |          |          |   |         |         |         |   |         |         |         |   |         |         |          |   |         |          |          |   |          |          |         |   |          |         |          |   |          |         |          |
| H                                              | 0.29891                                                                                                                                                                                                                                                                                                                                                                                                                                                                                                                                                                                                                                                                                                                                                                                                                                                                                                                                                                                                                                                                                                                                                                                                                                                                                                                                                                                                                                                                                                                                                                                                                                                                                                                                                                                                                                                                                                                                                                                        | -1.17678 | -0.32571 |          |          |   |         |          |          |   |         |         |          |   |         |         |          |   |         |         |          |   |         |          |          |   |         |         |          |   |         |         |         |   |          |          |         |   |         |         |          |   |          |         |          |   |          |         |          |   |          |          |         |   |          |         |         |   |          |         |          |   |          |         |         |   |          |         |          |   |          |         |          |   |         |          |          |   |         |         |         |   |         |         |         |   |         |         |          |   |         |          |          |   |          |          |         |   |          |         |          |   |          |         |          |
| O                                              | 1.65060                                                                                                                                                                                                                                                                                                                                                                                                                                                                                                                                                                                                                                                                                                                                                                                                                                                                                                                                                                                                                                                                                                                                                                                                                                                                                                                                                                                                                                                                                                                                                                                                                                                                                                                                                                                                                                                                                                                                                                                        | 0.79353  | 1.87969  |          |          |   |         |          |          |   |         |         |          |   |         |         |          |   |         |         |          |   |         |          |          |   |         |         |          |   |         |         |         |   |          |          |         |   |         |         |          |   |          |         |          |   |          |         |          |   |          |          |         |   |          |         |         |   |          |         |          |   |          |         |         |   |          |         |          |   |          |         |          |   |         |          |          |   |         |         |         |   |         |         |         |   |         |         |          |   |         |          |          |   |          |          |         |   |          |         |          |   |          |         |          |
| C                                              | 1.90663                                                                                                                                                                                                                                                                                                                                                                                                                                                                                                                                                                                                                                                                                                                                                                                                                                                                                                                                                                                                                                                                                                                                                                                                                                                                                                                                                                                                                                                                                                                                                                                                                                                                                                                                                                                                                                                                                                                                                                                        | 0.65811  | 3.29033  |          |          |   |         |          |          |   |         |         |          |   |         |         |          |   |         |         |          |   |         |          |          |   |         |         |          |   |         |         |         |   |          |          |         |   |         |         |          |   |          |         |          |   |          |         |          |   |          |          |         |   |          |         |         |   |          |         |          |   |          |         |         |   |          |         |          |   |          |         |          |   |         |          |          |   |         |         |         |   |         |         |         |   |         |         |          |   |         |          |          |   |          |          |         |   |          |         |          |   |          |         |          |
| C                                              | 1.08879                                                                                                                                                                                                                                                                                                                                                                                                                                                                                                                                                                                                                                                                                                                                                                                                                                                                                                                                                                                                                                                                                                                                                                                                                                                                                                                                                                                                                                                                                                                                                                                                                                                                                                                                                                                                                                                                                                                                                                                        | 1.02092  | -2.35487 |          |          |   |         |          |          |   |         |         |          |   |         |         |          |   |         |         |          |   |         |          |          |   |         |         |          |   |         |         |         |   |          |          |         |   |         |         |          |   |          |         |          |   |          |         |          |   |          |          |         |   |          |         |         |   |          |         |          |   |          |         |         |   |          |         |          |   |          |         |          |   |         |          |          |   |         |         |         |   |         |         |         |   |         |         |          |   |         |          |          |   |          |          |         |   |          |         |          |   |          |         |          |
| N                                              | 0.17423                                                                                                                                                                                                                                                                                                                                                                                                                                                                                                                                                                                                                                                                                                                                                                                                                                                                                                                                                                                                                                                                                                                                                                                                                                                                                                                                                                                                                                                                                                                                                                                                                                                                                                                                                                                                                                                                                                                                                                                        | -2.34504 | -0.66378 |          |          |   |         |          |          |   |         |         |          |   |         |         |          |   |         |         |          |   |         |          |          |   |         |         |          |   |         |         |         |   |          |          |         |   |         |         |          |   |          |         |          |   |          |         |          |   |          |          |         |   |          |         |         |   |          |         |          |   |          |         |         |   |          |         |          |   |          |         |          |   |         |          |          |   |         |         |         |   |         |         |         |   |         |         |          |   |         |          |          |   |          |          |         |   |          |         |          |   |          |         |          |
| N                                              | -1.11946                                                                                                                                                                                                                                                                                                                                                                                                                                                                                                                                                                                                                                                                                                                                                                                                                                                                                                                                                                                                                                                                                                                                                                                                                                                                                                                                                                                                                                                                                                                                                                                                                                                                                                                                                                                                                                                                                                                                                                                       | -2.89503 | 1.19260  |          |          |   |         |          |          |   |         |         |          |   |         |         |          |   |         |         |          |   |         |          |          |   |         |         |          |   |         |         |         |   |          |          |         |   |         |         |          |   |          |         |          |   |          |         |          |   |          |          |         |   |          |         |         |   |          |         |          |   |          |         |         |   |          |         |          |   |          |         |          |   |         |          |          |   |         |         |         |   |         |         |         |   |         |         |          |   |         |          |          |   |          |          |         |   |          |         |          |   |          |         |          |
| H                                              | -3.07072                                                                                                                                                                                                                                                                                                                                                                                                                                                                                                                                                                                                                                                                                                                                                                                                                                                                                                                                                                                                                                                                                                                                                                                                                                                                                                                                                                                                                                                                                                                                                                                                                                                                                                                                                                                                                                                                                                                                                                                       | 4.39694  | -2.50901 |          |          |   |         |          |          |   |         |         |          |   |         |         |          |   |         |         |          |   |         |          |          |   |         |         |          |   |         |         |         |   |          |          |         |   |         |         |          |   |          |         |          |   |          |         |          |   |          |          |         |   |          |         |         |   |          |         |          |   |          |         |         |   |          |         |          |   |          |         |          |   |         |          |          |   |         |         |         |   |         |         |         |   |         |         |          |   |         |          |          |   |          |          |         |   |          |         |          |   |          |         |          |
| H                                              | -2.72383                                                                                                                                                                                                                                                                                                                                                                                                                                                                                                                                                                                                                                                                                                                                                                                                                                                                                                                                                                                                                                                                                                                                                                                                                                                                                                                                                                                                                                                                                                                                                                                                                                                                                                                                                                                                                                                                                                                                                                                       | 5.83537  | -0.50654 |          |          |   |         |          |          |   |         |         |          |   |         |         |          |   |         |         |          |   |         |          |          |   |         |         |          |   |         |         |         |   |          |          |         |   |         |         |          |   |          |         |          |   |          |         |          |   |          |          |         |   |          |         |         |   |          |         |          |   |          |         |         |   |          |         |          |   |          |         |          |   |         |          |          |   |         |         |         |   |         |         |         |   |         |         |          |   |         |          |          |   |          |          |         |   |          |         |          |   |          |         |          |

|   |          |          |          |
|---|----------|----------|----------|
| H | -1.65887 | 4.87499  | 1.52650  |
| H | -0.94312 | 2.51883  | 1.56150  |
| H | -2.35740 | 2.02897  | -2.47131 |
| H | 0.98372  | -0.00602 | -2.71938 |
| H | 1.92786  | 1.48756  | -2.87997 |
| H | 0.18651  | 1.57759  | -2.61447 |
| H | -1.30219 | 0.25649  | -1.48618 |
| H | 1.40027  | 2.11917  | -0.53648 |
| H | 2.42264  | -1.60562 | -0.60187 |
| H | 6.18053  | -1.92829 | -0.96599 |
| H | 5.96614  | -1.86619 | 0.79295  |
| H | 4.89991  | -2.87942 | -0.19448 |
| H | 3.77611  | 2.39462  | -0.40948 |
| H | -1.80174 | -0.13229 | 1.22808  |
| H | -0.65917 | -2.12005 | 1.66632  |
| H | 2.89950  | 1.08138  | 3.44488  |
| H | 1.16358  | 1.20721  | 3.87253  |
| H | 1.88997  | -0.39346 | 3.58713  |
| O | -3.86112 | -2.37059 | 0.58212  |
| H | -3.41840 | -1.53849 | 0.30909  |
| C | -5.12187 | -2.04689 | 1.16439  |
| H | -5.57824 | -2.98405 | 1.49305  |
| H | -5.79236 | -1.56836 | 0.43816  |
| H | -5.01595 | -1.38542 | 2.03466  |
| H | 0.28325  | -2.49002 | -1.66295 |
| H | -2.11041 | -2.96134 | 1.42825  |
| C | -0.85981 | -3.00255 | -0.13665 |
| N | -1.64606 | -3.83658 | -0.85137 |
| H | -2.52529 | -4.08251 | -0.41135 |
| C | -1.58853 | -3.94769 | -2.30241 |
| H | -2.33918 | -4.67429 | -2.61542 |
| H | -0.61012 | -4.31857 | -2.62393 |
| H | -1.79638 | -2.99304 | -2.80298 |
| H | 5.79022  | 0.87298  | -0.11244 |

**POTENTIAL ENERGY SURFACE SCAN RESULTS FOR C-C BOND FORMATION STEP**

| T3               |                                | T4               |                                | T5               |                                | T7               |                                | T8               |                                | T9               |                                |
|------------------|--------------------------------|------------------|--------------------------------|------------------|--------------------------------|------------------|--------------------------------|------------------|--------------------------------|------------------|--------------------------------|
| $d_{C-C}$<br>(Å) | $\Delta\Delta E$<br>(kcal/mol) | $d_{C-C}$<br>(Å) | $\Delta\Delta E$<br>(kcal/mol) | $d_{C-C}$<br>(Å) | $\Delta\Delta E$<br>(kcal/mol) | $d_{C-C}$<br>(Å) | $\Delta\Delta E$<br>(kcal/mol) | $d_{C-C}$<br>(Å) | $\Delta\Delta E$<br>(kcal/mol) | $d_{C-C}$<br>(Å) | $\Delta\Delta E$<br>(kcal/mol) |
| 3.15             | 3.02                           | 3.14             | 7.69                           | 3.12             | 12.56                          | 3.14             | 9.59                           | 3.14             | 11.45                          | -                | -                              |
| 3.05             | 3.13                           | 3.04             | 7.48                           | 3.02             | 12.23                          | 3.04             | 9.33                           | 3.04             | 10.94                          | -                | -                              |
| 2.95             | 4.48                           | 2.94             | 7.33                           | 2.92             | 11.94                          | 2.94             | 9.10                           | 2.94             | 10.47                          | 2.99             | 9.35                           |
| 2.85             | 4.52                           | 2.84             | 7.28                           | 2.82             | 11.73                          | 2.84             | 8.94                           | 2.84             | 10.06                          | 2.89             | 9.11                           |
| 2.75             | 4.68                           | 2.74             | 7.32                           | 2.72             | 11.59                          | 2.74             | 8.90                           | 2.74             | 9.67                           | 2.79             | 8.96                           |
| 2.65             | 4.96                           | 2.64             | 7.48                           | 2.62             | 11.52                          | 2.64             | 9.04                           | 2.64             | 9.34                           | 2.69             | 8.91                           |
| 2.55             | 5.38                           | 2.54             | 7.76                           | 2.52             | 11.44                          | 2.54             | 9.00                           | 2.54             | 9.06                           | 2.59             | 8.93                           |
| 2.45             | 5.87                           | 2.44             | 7.60                           | 2.42             | 11.06                          | 2.44             | 8.76                           | 2.44             | 8.79                           | 2.49             | 8.83                           |
| 2.35             | 6.44                           | 2.34             | 7.46                           | 2.32             | 10.55                          | 2.34             | 8.46                           | 2.34             | 8.48                           | 2.39             | 8.52                           |
| 2.25             | 6.30                           | 2.24             | 7.10                           | 2.22             | 9.82                           | 2.24             | 8.02                           | 2.24             | 8.02                           | 2.29             | 8.10                           |
| 2.15             | 5.94                           | 2.14             | 6.50                           | 2.12             | 8.78                           | 2.14             | 7.32                           | 2.14             | 7.30                           | 2.19             | 7.48                           |
| 2.05             | 5.16                           | 2.04             | 5.56                           | 2.02             | 7.31                           | 2.04             | 6.13                           | 2.04             | 6.18                           | 2.09             | 6.52                           |
| 1.95             | 3.95                           | 1.94             | 4.20                           | 1.92             | 5.39                           | 1.94             | 4.56                           | 1.94             | 4.61                           | 1.99             | 5.16                           |
| 1.85             | 2.39                           | 1.84             | 2.52                           | 1.82             | 3.14                           | 1.84             | 2.70                           | 1.84             | 2.72                           | 1.89             | 3.43                           |
| 1.75             | 0.82                           | 1.74             | 0.84                           | 1.72             | 1.03                           | 1.74             | 0.90                           | 1.74             | 0.90                           | 1.79             | 1.52                           |
| 1.65             | 0.00                           | 1.64             | 0.00                           | 1.62             | 0.00                           | 1.64             | 0.00                           | 1.64             | 0.00                           | 1.69             | 0.00                           |
